# Supplementary material for: Trifluoromethylation of pyridines through skeletal rearrangement
Source: Royal Society of Chemistry journal article supplement (doi:10.1039/d6sc04438g), 2026-06-17

# Trifluoromethylation of Pyridines through Skeletal Rearrangement

Haiwen Wang<sup>§</sup>, Nilanjan Bhaduri<sup>§</sup>, and Michael F. Greaney\*

## Supporting Information

### Table of Contents

|                                                   |    |
|---------------------------------------------------|----|
| 1. General Methods                                | 2  |
| 2. Reaction Optimization                          | 3  |
| 3. General Synthetic Procedures                   | 3  |
| 4. Limitations                                    | 6  |
| 5. Synthesis of Pyridine Starting Materials       | 7  |
| 6. Synthesis of Zincke Ketones                    | 11 |
| 7. Synthesis of Zincke Imines                     | 15 |
| 8. Synthesis of Rearranged Pyridine Products      | 17 |
| 9. Product Derivatization                         | 26 |
| 10. Sequentially functionalized Pyridine Products | 27 |
| 11. X-Ray Crystallization                         | 29 |
| 12. References                                    | 44 |
| 13. NMR Spectra                                   | 45 |

## 1. General Methods

Nuclear magnetic resonance spectra were acquired on either 500 MHz (Bruker® AVII+ 500, Bruker AVIII HD 500) or 400 MHz (Bruker AVIII HD 400, Bruker AVIII 400). All <sup>1</sup>H NMR spectra are reported in parts per million (ppm) and were measured relative to the signals at 7.26 ppm (CDCl<sub>3</sub>), 2.05 ppm (Acetone-d<sub>6</sub>). All <sup>13</sup>C NMR spectra were reported in ppm relative to residual CDCl<sub>3</sub> (77.16 ppm), and were obtained with <sup>1</sup>H-decoupling. All <sup>19</sup>F chemical shifts were unadjusted from raw data. Data for <sup>1</sup>H NMR are described as follows: chemical shift ( $\delta$  in ppm), multiplicity (s, singlet; d, doublet; t, triplet; q, quartet; quin, quintet; m, multiplet; br, broad signal), coupling constant (Hz), and integration.

High resolution mass spectra were obtained on ThermoFisher Scientific Q-Exactive™, Thermo Scientific Exactive plus EMR, and Agilent 6530 Q-TOF instruments, using either electrospray ionisation (ESI), atmospheric-pressure chemical ionisation (APCI) as ionisation methods in the positive and negative mode.

Flash column chromatography was carried out by using re-used 10g, 25g, or 50g Biotage® Snap Ultra or Biotage Sfär Silica cartridges on a Biotage Isolera Four automated column, using 35-70  $\mu$ m, 60 Å silica gel for chromatography from ThermoFisher Scientific® or 40-63  $\mu$ m 60 Å silica gel from Sigma Aldrich.

Melting points (mp) were recorded on a Griffin melting point apparatus to the nearest degree and are uncorrected.

All air and/or moisture-sensitive reactions were performed under an atmosphere of dry nitrogen using anhydrous solvents. All solvents for air-sensitive reactions were degassed by bubbling N<sub>2</sub> on the Schlenk line. All commercially available reagents and solvents were used as received without further purification.

## 2. Reaction Optimization

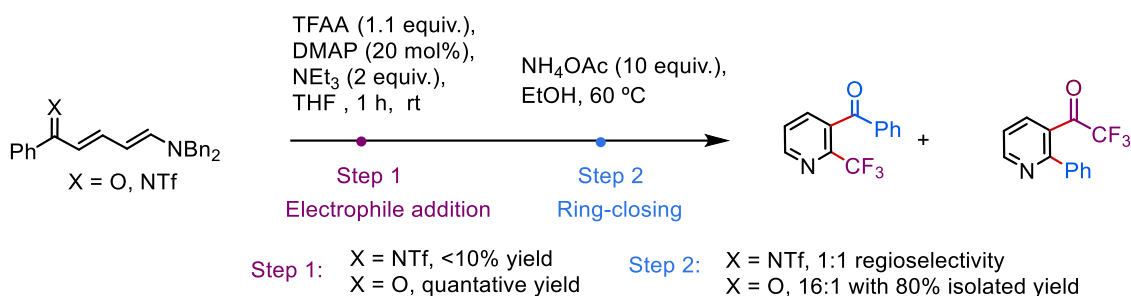

| Entry | Variation from standard condition  | Yield (%) |
|-------|------------------------------------|-----------|
| 1     | None                               | 80        |
| 2     | Without DMAP in Step 1             | 0         |
| 3     | 60 °C instead of r.t. in Step 1    | 77        |
| 4     | 0 °C instead of r.t. in Step 1     | 80        |
| 5     | overnight instead of 1 h in Step 1 | 80        |

**Table 1:** All reactions were carried out on a 0.1 mmol scale, isolated yields.

## 3. General Synthetic Procedures

### General Procedure A: Suzuki coupling of bromopyridines and (hetero)aryl boronic acids

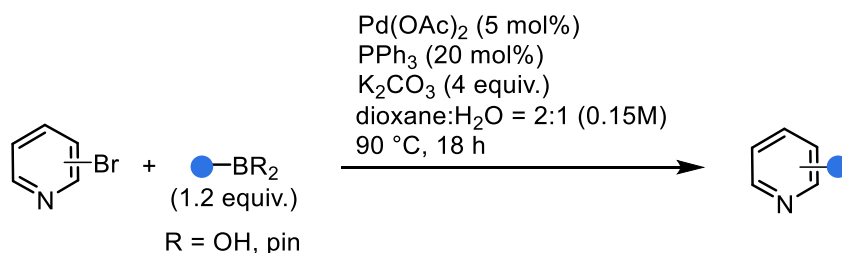

To the reaction vessel was added respective bromopyridines (1 equiv.), appropriate boronic acid/boronic pinacol ester (1.2 equiv.), K<sub>2</sub>CO<sub>3</sub> (4 equiv.), Pd(OAc)<sub>2</sub> (5 mol%), and PPh<sub>3</sub> (20 mol%), and the vessel was evacuated and refilled with N<sub>2</sub> three times on a Schlenk line. A 2:1 mixture of 1,4-dioxane and water (0.15 M), previously degassed by bubbling through N<sub>2</sub> for 5 minutes, was added, and the resulting biphasic mixture was heated to 90 °C, while stirring for 18 h. The mixture was allowed to cool to room temperature, diluted with H<sub>2</sub>O, and extracted three times with EtOAc. The combined organic extracts were dried over MgSO<sub>4</sub>, filtered, and concentrated in vacuo to yield the crude product, which was purified by silica column chromatography.

### General Procedure B: Synthesis of Zincke ketone

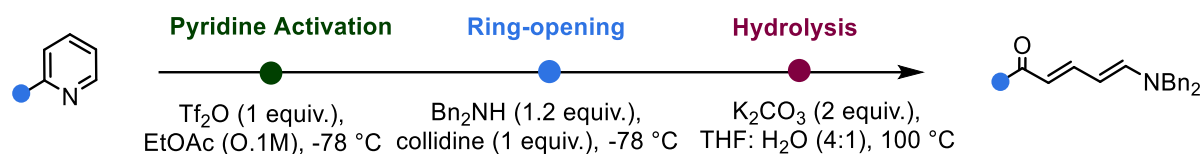

a) An oven-dried microwave vial containing pyridine substrate (1.0 equiv.) was evacuated and backfilled 3 times with nitrogen. EtOAc (0.1 M) was added (*pyridine substrates with low boiling points were added after EtOAc*). The reaction vial was cooled to  $-78\text{ }^{\circ}\text{C}$ , and Tf<sub>2</sub>O (1.0 equiv.) was added dropwise over 5 minutes. The reaction was stirred for 30 minutes before dibenzylamine (1.2 equiv.) was added dropwise as a solution (1.0 M in EtOAc) followed by collidine (1.0 equiv.). The reaction was stirred for a further 30 minutes at  $-78\text{ }^{\circ}\text{C}$ . The cooling bath was removed, and the reaction was allowed to warm to room temperature while stirring for approximately 30 minutes.

b) The solvent was removed in vacuo, and K<sub>2</sub>CO<sub>3</sub> (2.0 equiv.) and a 2:1 mixture of THF: H<sub>2</sub>O (0.1M) were added. The reaction mixture was stirred at 100 °C for 18-24 hours. The organic layer was separated. The aqueous layer was washed with EtOAc (3 ×). The mixture was allowed to cool to room temperature, diluted with H<sub>2</sub>O, and extracted three times with EtOAc. The combined organic extracts were dried over MgSO<sub>4</sub>, filtered, and concentrated in vacuo to yield the crude product, which was purified by silica column chromatography.

### General Procedure C: Synthesis of Zincke imine

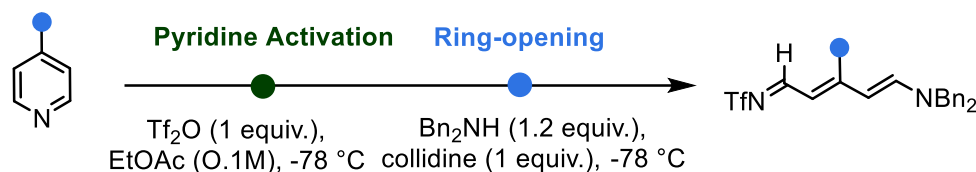

An oven-dried microwave vial containing pyridine substrate (1.0 equiv.) was evacuated and backfilled 3 times with nitrogen; EtOAc (0.1 M) was added to it. The reaction vial was cooled to  $-78\text{ }^{\circ}\text{C}$ , and Tf<sub>2</sub>O (1.0 equiv.) was added dropwise over 5 minutes. The reaction was stirred for 30 minutes before dibenzylamine (1.2 equiv.) was added dropwise as a solution (1.0 M in EtOAc) followed by collidine (1.0 equiv.). The reaction was stirred for a further 30 minutes at  $-78\text{ }^{\circ}\text{C}$ . The cooling bath was removed, and the reaction was allowed to warm to room temperature while stirring for approximately 30 minutes. The reaction was diluted with EtOAc and washed with H<sub>2</sub>O (3 ×), followed by brine (2 ×). The organic extract was dried over Na<sub>2</sub>SO<sub>4</sub> and filtered.

After filtration, the organic extract was dissolved in 1-2 mL DCM and added dropwise to excess hexane (*approx.* 100 mL per 1.0 mmol) and, was kept overnight in a  $-20\text{ }^{\circ}\text{C}$  fridge. Then, the excess hexane was decanted off, and the residual solid/oil was washed with hexane, redissolved in DCM and concentrated *in vacuo*, to provide the pure Zincke imine product.

### General Procedure D: Skeletal rearrangement

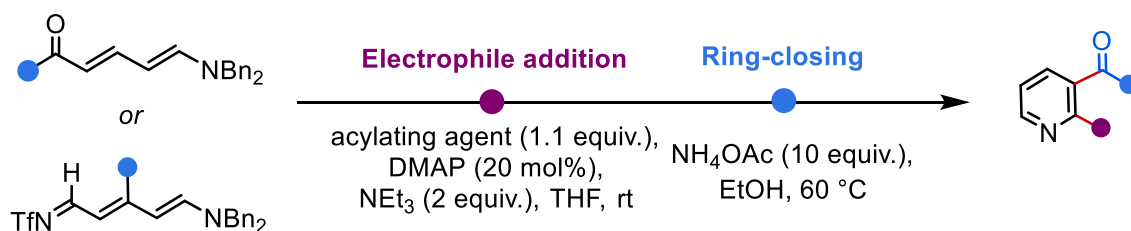

a) An oven-dried microwave vial containing Zincke ketone substrate (1.0 equiv.), DMAP (20 mol%) and  $\text{Et}_3\text{N}$  (2.0 equiv.) were taken in dry THF (0.1 M). The acylating reagent (1.1 equiv.) was added to it. The reaction was stirred at room temperature for 1-2 hours. However, for disubstituted arene bearing Zincke ketones (15i and 15j), the reaction was performed at 0 °C. For Zincke imines (1 equiv.), 1.2 equivalents of TFAA were used at 40 °C.

b)  $\text{NH}_4\text{OAc}$  (10.0 equiv.) and EtOH (0.05 M) were added. The reaction mixture was stirred at 60 °C for 2-4 hours and then concentrated under reduced pressure. The residue was redissolved with water (8 mL) and DCM (30 mL) and extracted with DCM (10 mL  $\times$  3). The combined organic layers were washed with brine, dried over  $\text{Na}_2\text{SO}_4$ , and concentrated under reduced pressure. The crude product was then purified by flash column chromatography to afford the rearrangement product.

### General Procedure E: Sequential functionalization (incorporating C5 halogenation)

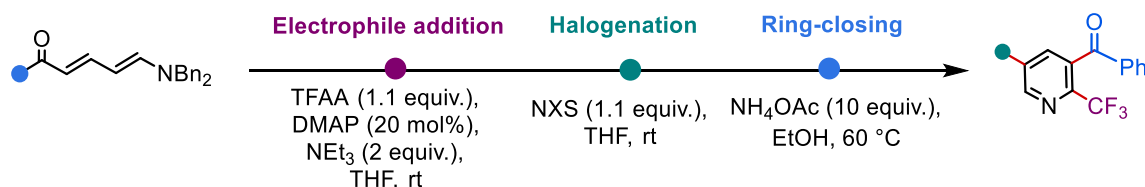

a) To the solution of 2-phenyl Zincke ketone (1.0 equiv.) in dry THF (0.1 M), DMAP (20 mol%) and  $\text{Et}_3\text{N}$  (2.0 equiv.) were added. Subsequently, trifluoroacetic anhydride (0.22 mmol, 1.1 equiv.). The reaction was stirred at room temperature for 1-2 hours.

b) *N*-halo succinimide (1.1 equiv.) was added to the above. The reaction mixture was stirred at room temperature for 1 h. However, for fluorination, NFSI (2 equiv.) was added to the above, and the reaction was stirred overnight.

c)  $\text{NH}_4\text{OAc}$  (10.0 equiv.) and EtOH (0.05 M) were added. The reaction mixture was stirred at 60 °C for 2-4 hours and then concentrated under reduced pressure. The residue was redissolved with water (8 mL) and DCM (30 mL) and extracted with DCM (10 mL  $\times$  3). The combined organic layers were washed with brine, dried over  $\text{Na}_2\text{SO}_4$ , and concentrated under reduced pressure. The crude product was then purified by flash column chromatography to afford the rearranged trisubstituted product.



## 5. Synthesis of Pyridine Starting Materials

### 2-([1,1'-biphenyl]-4-yl)pyridine (S1)

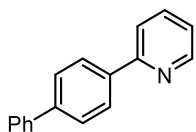

Prepared according to *General Procedure A* using 2-bromopyridine (0.24 mL, 2.5 mmol), 4-biphenylboronic acid (594.1 mg, 3 mmol),  $K_2CO_3$  (1.382 g, 10 mmol),  $Pd(OAc)_2$  (28.06 mg, 0.125 mmol) and  $PPh_3$  (131.2 mg, 0.5 mmol) in 1,4-dioxane (10 mL) and water (5 mL) to yield the titled compound as a white solid (439 mg, 76%).

$^1H$  NMR (400 MHz,  $CDCl_3$ )  $\delta$  8.75 – 8.61 (m, 1H), 8.07 – 7.94 (m, 2H), 7.78 – 7.54 (m, 6H), 7.46 – 7.27 (m, 2H), 7.24 – 7.17 (m, 2H).

$^{13}C$  NMR (101 MHz,  $CDCl_3$ )  $\delta$  156.0, 148.7, 141.0, 139.7, 137.1, 136.2, 128.0, 126.7, 126.5, 126.3, 121.3, 119.7.

The data are consistent with the literature.<sup>[1]</sup>

### 2-(4-vinylphenyl)pyridine (S2)

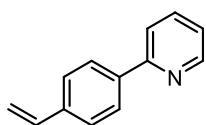

Prepared according to *General Procedure A* using 2-bromopyridine (0.24 mL, 2.5 mmol), 4-vinylphenylboronic acid (443.9 mg, 3 mmol),  $K_2CO_3$  (1.382 g, 10 mmol),  $Pd(OAc)_2$  (28.06 mg, 0.125 mmol) and  $PPh_3$  (131.2 mg, 0.5 mmol) in 1,4-dioxane (10 mL) and water (5 mL) to yield the titled compound as a colourless oil (407.5 mg, 90%).

$^1H$  NMR (400 MHz,  $CDCl_3$ )  $\delta$  8.69 (dt,  $J$  = 4.9, 1.6 Hz, 1H), 8.02 – 7.94 (m, 2H), 7.77 – 7.72 (m, 2H), 7.56 – 7.49 (m, 2H), 7.22 (ddd,  $J$  = 5.8, 4.9, 2.8 Hz, 1H), 6.77 (dd,  $J$  = 17.6, 10.9 Hz, 1H), 5.83 (dd,  $J$  = 17.6, 0.9 Hz, 1H), 5.31 (dd,  $J$  = 10.9, 0.9 Hz, 1H).

$^{13}C$  NMR (101 MHz,  $CDCl_3$ )  $\delta$  157.1, 149.8, 138.7, 138.3, 136.9, 136.5, 127.2, 126.8, 122.2, 120.6, 114.7.

The data are consistent with the literature.<sup>[1]</sup>

### 2-([1,1'-biphenyl]-4-yl)-4-phenylpyridine (S3)

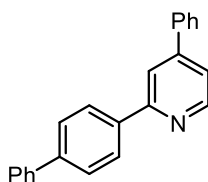

Prepared according to *General Procedure A* using 2-bromo-4-phenylpyridine (585 mg, 2.5 mmol), 4-biphenylboronic acid (594.1 mg, 3 mmol),  $K_2CO_3$  (1.382 g, 10 mmol),  $Pd(OAc)_2$  (28.06 mg, 0.125 mmol) and  $PPh_3$  (131.2 mg, 0.5 mmol) to yield the titled compound as a pale yellow solid (729.13 mg, 95%).

$^1H$  NMR (500 MHz,  $CDCl_3$ )  $\delta$  8.66 (d,  $J$  = 5.1 Hz, 1H), 8.05 (d,  $J$  = 7.9 Hz, 2H), 7.88 (s, 1H), 7.68 – 7.53 (m, 6H), 7.42 (t,  $J$  = 7.3 Hz, 2H), 7.37 (t,  $J$  = 7.4 Hz, 4H), 7.27 (t,  $J$  = 7.4 Hz, 1H).  $^{13}C$  NMR (126 MHz,  $CDCl_3$ )  $\delta$  157.6, 150.1, 149.5, 141.9, 140.6, 138.5, 138.2, 129.2, 129.2, 128.9, 127.6, 127.5, 127.5, 127.2, 120.4, 118.8, 115.9.

The data are consistent with the literature.<sup>[2]</sup>

### 2-(naphthalen-2-yl)-4-phenylpyridine (S4)

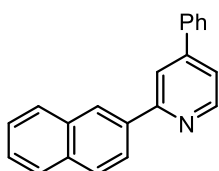

Prepared according to *General Procedure A* using 2-bromo-4-phenylpyridine (585 mg, 2.5 mmol), 2-naphthylboronic acid (516 mg, 3 mmol),  $K_2CO_3$  (1.382 g, 10 mmol),  $Pd(OAc)_2$  (28.06 mg, 0.125 mmol) and  $PPh_3$  (131.2 mg, 0.5 mmol) to yield the titled compound as yellow oil (576 mg, 82%).

$^1H$  NMR (500 MHz,  $CDCl_3$ )  $\delta$  8.80 (d,  $J$  = 5.1 Hz, 1H), 8.56 (d,  $J$  = 1.9 Hz, 1H), 8.21 (dd,  $J$  = 8.6, 1.8 Hz, 1H), 8.08 (d,  $J$  = 1.7 Hz, 1H), 7.98 (d,  $J$  = 8.2 Hz, 2H), 7.93 – 7.87 (m, 1H), 7.77 – 7.70 (m, 2H), 7.56 – 7.51 (m, 4H), 7.48 (dd,  $J$  = 6.4, 3.8 Hz, 2H).  $^{13}C$  NMR (126 MHz,  $CDCl_3$ )  $\delta$  158.0, 150.2, 149.6, 138.6, 136.7, 133.8, 133.6, 129.3, 129.2, 128.9, 128.6, 127.8, 127.2, 126.7, 126.6, 126.5, 124.8, 120.5, 119.2.

The data are consistent with the literature.<sup>[2]</sup>

## 2-(furan-3-yl)pyridine (S5)

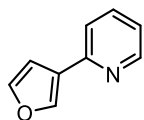

Prepared according to *General Procedure A* using 2-bromopyridine (0.24 mL, 2.5 mmol), 3-furylboronic acid (335.7 mg, 3 mmol),  $K_2CO_3$  (1.382 g, 10 mmol),  $Pd(OAc)_2$  (28.06 mg, 0.125 mmol) and  $PPh_3$  (131.2 mg, 0.5 mmol) to yield the titled compound as a colourless liquid (275.6 mg, 76%).

$^1H$  NMR (400 MHz,  $CDCl_3$ )  $\delta$  8.58 (ddd,  $J = 4.9, 2.0, 1.0$  Hz, 1H), 8.03 (q,  $J = 1.3$  Hz, 1H), 7.67 (td,  $J = 7.7, 1.9$  Hz, 1H), 7.52 – 7.41 (m, 2H), 7.14 (dddt,  $J = 6.0, 4.8, 1.9, 1.1$  Hz, 1H), 6.90 (dd,  $J = 1.9, 0.9$  Hz, 1H).

$^{13}C$  NMR (101 MHz,  $CDCl_3$ )  $\delta$  151.9, 149.7, 144.0, 141.3, 136.8, 127.1, 121.9, 120.2, 108.7.

The data are consistent with the literature.<sup>[1]</sup>

## 6'-(trifluoromethyl)-2,3'-bipyridine (S6)

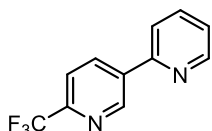

Prepared according to *General Procedure A* using 2-bromopyridine (0.24 mL, 2.5 mmol), (6-(Trifluoromethyl)pyridin-3-yl)boronic acid (572.8 mg, 3 mmol),  $K_2CO_3$  (1.382 g, 10 mmol),  $Pd(OAc)_2$  (28.06 mg, 0.125 mmol) and  $PPh_3$  (131.2 mg, 0.5 mmol) to yield the titled compound as a white solid (487.33 mg, 87%).

$^1H$  NMR (400 MHz,  $CDCl_3$ )  $\delta$  9.32 – 9.26 (m, 1H), 8.81 – 8.73 (m, 1H), 8.57 – 8.47 (m, 1H), 7.83 (m, 3H), 7.37 (m, 1H).

$^{13}C$  NMR (101 MHz,  $CDCl_3$ )  $\delta$  153.2, 150.3, 148.4, 148.1 (q,  $J = 34.7$  Hz), 137.4, 135.7, 123.7, 121.6 (q,  $J = 274.1$  Hz), 121.0, 120.5.

The data are consistent with the literature.<sup>[4]</sup>

## 2-(dibenzo[b,d]furan-3-yl)pyridine (S7)

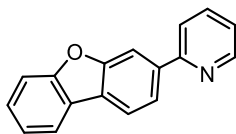

Prepared according to *General Procedure A* using 2-bromopyridine (0.24 mL, 2.5 mmol), 2-(Dibenzo[b,d]furan-3-yl)-4,4,5,5-tetramethyl-1,3,2-dioxaborolane (882.45 mg, 3 mmol),  $K_2CO_3$  (1.382 g, 10 mmol),  $Pd(OAc)_2$  (28.06 mg, 0.125 mmol) and  $PPh_3$  (131.2 mg, 0.5 mmol) to yield the titled compound as a white solid (557.6 mg, 91%).

$^1H$  NMR (400 MHz,  $CDCl_3$ )  $\delta$  8.77 – 8.72 (m, 1H), 8.24 (t,  $J = 1.1$  Hz, 1H), 8.03 (t,  $J = 1.2$  Hz, 2H), 7.99 (d,  $J = 7.6$  Hz, 1H), 7.86 – 7.76 (m, 2H), 7.60 (d,  $J = 8.2$  Hz, 1H), 7.52 – 7.44 (m, 1H), 7.37 (t,  $J = 7.5$  Hz, 1H), 7.30 – 7.26 (m, 1H).

$^{13}C$  NMR (101 MHz,  $CDCl_3$ )  $\delta$  157.2, 157.1, 157.0, 149.8, 138.8, 137.1, 127.6, 125.1, 124.1, 123.0, 122.4, 121.9, 121.0, 121.0, 120.9, 111.9, 110.3.

The data are consistent with the literature.<sup>[3]</sup>

## 9-phenyl-3-(pyridin-2-yl)-9H-carbazole (S8)

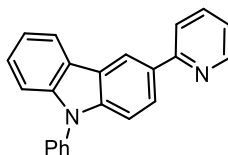

Prepared according to *General Procedure A* using 2-bromopyridine (0.24 mL, 2.5 mmol) 9-phenyl-3-(4,4,5,5-tetramethyl-1,3,2-dioxaborolan-2-yl)-9H-carbazole (1.1 g, 3 mmol),  $K_2CO_3$  (1.382 g, 10 mmol),  $Pd(OAc)_2$  (28.06 mg, 0.125 mmol) and  $PPh_3$  (131.2 mg, 0.5 mmol) to yield the titled compound as a white solid (736 mg, 92%).

$^1H$  NMR (400 MHz,  $CDCl_3$ )  $\delta$  8.84 (s, 1H), 8.74 (d,  $J = 4.8$  Hz, 1H), 8.24 (d,  $J = 7.8$  Hz, 1H), 8.07 (d,  $J = 8.7$  Hz, 1H), 7.87 (d,  $J = 8.0$  Hz, 1H), 7.78 (t,  $J = 7.8$  Hz, 1H), 7.70 – 7.56 (m, 4H), 7.54 – 7.40 (m, 4H), 7.32 (dt,  $J = 8.1, 4.0$  Hz, 1H), 7.24 (d,  $J = 13.1$  Hz, 1H).

$^{13}C$  NMR (101 MHz,  $CDCl_3$ )  $\delta$  158.1, 149.6, 141.5, 137.6, 136.8, 131.6, 130.0, 127.6, 127.1, 126.3, 125.2, 124.0, 123.7, 121.4, 120.7, 120.4, 119.2, 110.0.

The data are consistent with the literature.<sup>[1]</sup>

## 2-methyl-8-(pyridin-2-yl)benzofuro[2,3-b]pyridine (S9)

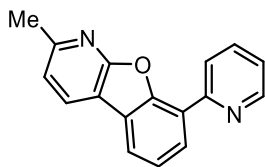

Prepared according to *General Procedure A* using 2-bromopyridine (0.24 mL, 2.5 mmol), 2-Methyl-8-(4,4,5,5-tetramethyl-1,3,2-dioxaborolan-2-yl)benzofuro[2,3-b]pyridine (927.4 mg, 3 mmol),  $K_2CO_3$  (1.382 g, 10 mmol),  $Pd(OAc)_2$  (28.06 mg, 0.125 mmol) and  $PPh_3$  (131.2 mg, 0.5 mmol) to yield the titled compound as an off-white solid (585.2 mg, 90%).

$^1H$  NMR (400 MHz,  $CDCl_3$ )  $\delta$  8.76 (qd,  $J = 2.9, 1.2$  Hz, 1H), 8.53 (m, 1H), 8.37 (dt,  $J = 7.9, 1.6$  Hz, 1H), 8.16 (dd,  $J = 7.8, 2.9$  Hz, 1H), 7.99 – 7.90 (m, 1H), 7.83 (tt,  $J = 8.2, 1.5$  Hz, 1H), 7.51 (d,  $J = 2.8$  Hz, 1H), 7.28 (tdd,  $J = 7.8, 3.6, 2.1$  Hz, 1H), 7.21 (dd,  $J = 7.7, 2.7$  Hz, 1H), 2.70 (s, 3H).  $^{13}C$  NMR (101 MHz,  $CDCl_3$ )  $\delta$  161.9, 155.5, 151.9, 150.8, 148.6, 135.8, 128.9, 126.7, 123.7, 123.3, 122.8, 122.5, 121.6, 120.4, 118.0, 112.6, 23.7.

The data are consistent with the literature.<sup>[1]</sup>

## 4-(3-vinylphenyl)pyridine (S10)

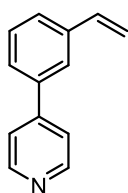

Prepared according to *General Procedure A* using 4-bromopyridine hydrochloride (487.5 mg, 2.5 mmol), 3-vinylphenylboronic acid (444 mg, 3 mmol),  $K_2CO_3$  (1.382 g, 10 mmol),  $Pd(OAc)_2$  (28.06 mg, 0.125 mmol) and  $PPh_3$  (131.2 mg, 0.5 mmol) to yield the titled compound as yellow oil (400 mg, 88%).

$^1H$  NMR (400 MHz,  $CDCl_3$ )  $\delta$  8.73 – 8.52 (m, 2H), 7.65 (d,  $J = 1.8$  Hz, 1H), 7.58 – 7.39 (m, 5H), 6.79 (dd,  $J = 17.6, 10.9$  Hz, 1H), 5.84 (dd,  $J = 17.6, 0.8$  Hz, 1H), 5.34 (dd,  $J = 10.9, 0.8$  Hz, 1H).

$^{13}C$  NMR (101 MHz,  $CDCl_3$ )  $\delta$  149.6, 138.5, 138.3, 136.3, 129.4, 126.9, 126.5, 125.0, 121.9, 115.0.

The data are consistent with the literature.

## 4-(4-methoxyphenyl)pyridine (S11)

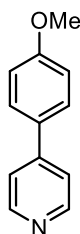

Prepared according to *General Procedure A* using 4-bromopyridine hydrochloride (487.5 mg, 2.5 mmol), 4-methoxyphenylboronic acid (456 mg, 3 mmol),  $K_2CO_3$  (1.382 g, 10 mmol),  $Pd(OAc)_2$  (28.06 mg, 0.125 mmol) and  $PPh_3$  (131.2 mg, 0.5 mmol) to yield the titled compound as a pale yellow solid (393.1 mg, 85%).

$^1H$  NMR (500 MHz,  $CDCl_3$ )  $\delta$  8.64 (s, 2H), 7.62 – 7.55 (m, 2H), 7.49 (d,  $J = 5.1$  Hz, 2H), 7.00 (d,  $J = 8.6$  Hz, 2H), 3.85 (s, 3H).

$^{13}C$  NMR (126 MHz,  $CDCl_3$ )  $\delta$  160.8, 149.6, 148.4, 130.2, 128.3, 121.3, 114.7, 55.5.

The data are consistent with the literature.<sup>[5]</sup>

## 4-(naphthalen-2-yl)pyridine (S12)

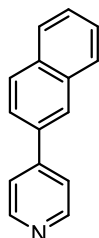

Prepared according to *General Procedure A* using 4-bromopyridine hydrochloride (487.5 mg, 2.5 mmol), 2-naphthylboronic acid (516 mg, 3 mmol),  $K_2CO_3$  (1.382 g, 10 mmol),  $Pd(OAc)_2$  (28.06 mg, 0.125 mmol) and  $PPh_3$  (131.2 mg, 0.5 mmol) to yield the titled compound as a white solid (400 mg, 78%).

$^1H$  NMR (400 MHz,  $CDCl_3$ )  $\delta$  8.69 (d,  $J = 5.9$  Hz, 2H), 8.07 (s, 1H), 7.94 – 7.82 (m, 3H), 7.74 – 7.66 (m, 1H), 7.58 (d,  $J = 5.1$  Hz, 2H), 7.53 (dt,  $J = 6.2, 3.6$  Hz, 2H).

$^{13}C$  NMR (101 MHz,  $CDCl_3$ )  $\delta$  150.2, 148.3, 135.2, 133.4, 129.0, 128.5, 127.7, 126.9, 126.7, 126.4, 124.5, 121.8.

The data are consistent with the literature.<sup>[6]</sup>

#### 4-(thiophen-3-yl)pyridine (S13)

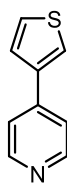

Prepared according to *General Procedure A* using 4-bromopyridine hydrochloride (487.5 mg, 2.5 mmol), 3-thienylboronic acid (384 mg, 3 mmol),  $K_2CO_3$  (1.382 g, 10 mmol),  $Pd(OAc)_2$  (28.06 mg, 0.125 mmol) and  $PPh_3$  (131.2 mg, 0.5 mmol) to yield the titled compound as an off-white solid (322 mg, 80%).

$^1H$  NMR (400 MHz,  $CDCl_3$ )  $\delta$  8.65 – 8.60 (m, 2H), 7.69 (dd,  $J$  = 2.6, 1.7 Hz, 1H), 7.53 – 7.50 (m, 2H), 7.46 – 7.44 (m, 2H).

$^{13}C$  NMR (126 MHz,  $CDCl_3$ )  $\delta$  150.0, 142.9, 139.3, 127.2, 125.7, 123.3, 120.9.

The data are consistent with the literature.<sup>[6]</sup>

#### 2-(3-((5-(4-fluorophenyl)thiophen-2-yl)methyl)-4-methylphenyl)pyridine (S14)

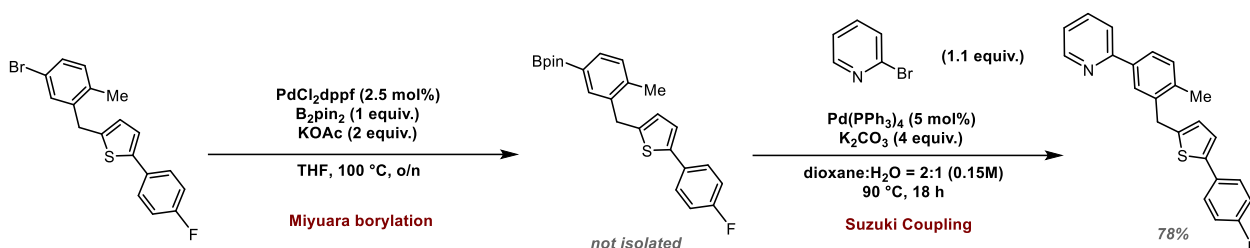

**Step 1 (Miyuara borylation):** In an oven-dried microwave vial, 2-(5-bromo-2-methylbenzyl)-5-(4-fluorophenyl)thiophene (1.1 g, 3 mmol) was added with  $PdCl_2 \cdot dppf$  (54.88 mg, 0.075 mmol, 2.5 mol%),  $KOAc$  (588.9 mg, 6 mmol, 2.0 equiv.), and  $B_2pin_2$  (761.8 mg, 3 mmol, 1.0 equiv.). The vial was evacuated and backfilled 3 times with nitrogen, and then dry THF (15 mL) was added to it. The reaction mixture was heated to 90 °C while stirring overnight. The mixture was allowed to cool to room temperature, diluted with  $H_2O$ , and extracted three times with  $EtOAc$ . The combined organic extracts were dried over  $MgSO_4$ , filtered, and concentrated in vacuo to yield the crude product, which was used for the next step without purification.

**Step 2 (Suzuki coupling):** To the reaction vessel with crude product, 2-bromopyridine (0.32 mL, 3.3 mmol, 1.1 equiv.),  $K_2CO_3$  (1.65 g, 12 mmol, 4 equiv.), and  $Pd(PPh_3)_4$  (173.3 mg, 0.15 mmol, 5 mol%) were added, and the vessel was evacuated and refilled with  $N_2$  three times on a Schlenk line. A 2:1 mixture of 1,4-dioxane (12 mL) and water (6 mL), previously degassed by bubbling through  $N_2$  for 5 minutes, was added, and the resulting biphasic mixture was heated to 90 °C while stirring for 18 h. The mixture was allowed to cool to room temperature, diluted with  $H_2O$ , and extracted three times with  $EtOAc$ . The combined organic extracts were dried over  $MgSO_4$ , filtered, and concentrated in vacuo to yield the crude product, which was purified by silica column chromatography to yield the titled compound as a white solid (850 mg, 78%).

$^1H$  NMR (400 MHz,  $CDCl_3$ )  $\delta$  8.69 (d,  $J$  = 4.8 Hz, 1H), 7.92 (d,  $J$  = 2.0 Hz, 1H), 7.82 (dd,  $J$  = 7.9, 2.0 Hz, 1H), 7.76 – 7.68 (m, 2H), 7.47 (ddd,  $J$  = 8.7, 5.4, 2.7 Hz, 2H), 7.30 (d,  $J$  = 7.9 Hz, 1H), 7.21 (td,  $J$  = 4.6, 2.3 Hz, 1H), 7.06 – 6.96 (m, 3H), 6.70 (d,  $J$  = 3.6 Hz, 1H), 4.22 (s, 2H), 2.38 (s, 3H).

$^{19}F$  NMR (376 MHz,  $CDCl_3$ )  $\delta$  -115.21.

$^{13}C$  NMR (101 MHz,  $CDCl_3$ )  $\delta$  162.2 (d,  $J$  = 246.5 Hz), 157.3, 149.6, 143.5, 141.6, 138.7, 137.7, 137.4, 137.0, 131.0 (d,  $J$  = 3.4 Hz), 128.3, 127.2 (d,  $J$  = 8.0 Hz), 125.8 (d,  $J$  = 48.7 Hz), 125.6, 122.8, 122.1, 120.6, 115.9, 115.8, 34.5, 19.5.

**HRMS** (+APCI): Calculated for:  $C_{23}H_{19}FN$   $[M+H]^+$  360.1222, found 360.1216.

## 6. Synthesis of Zincke ketones

### (2E,4E)-5-(dibenzylamino)-1-phenylpenta-2,4-dien-1-one (15b)

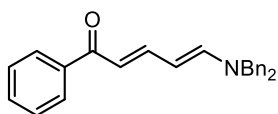

Prepared according to *General Procedure B* using 2-phenylpyridine (155.2 mg, 1 mmol), Tf<sub>2</sub>O (169 μL, 1 mmol), Bn<sub>2</sub>NH (179 μL, 1.2 mmol), collidine (132 μL, 1 mmol), and K<sub>2</sub>CO<sub>3</sub> (276.4 mg, 2 mmol) to yield the titled compound as a yellow solid (289.4 mg, 82%).

**<sup>1</sup>H NMR** (400 MHz, CDCl<sub>3</sub>) δ 7.91 (d, *J* = 7.0 Hz, 2H), 7.68 (dd, *J* = 14.2, 11.7 Hz, 1H), 7.49 – 7.30 (m, 9H), 7.19 (d, *J* = 7.1 Hz, 4H), 7.14 (d, *J* = 12.7 Hz, 1H), 6.61 (d, *J* = 14.3 Hz, 1H), 5.56 (t, *J* = 12.2 Hz, 1H), 4.36 (s, 4H).

**<sup>13</sup>C NMR** (101 MHz, CDCl<sub>3</sub>) δ 189.8, 152.3, 148.9, 139.9, 136.1, 131.4, 129.0, 128.3, 128.0, 127.5, 113.8, 98.9.

**HRMS** (+APCI): Calculated for: C<sub>25</sub>H<sub>24</sub>NO [M+H]<sup>+</sup> 354.1858, found 354.1850.

The data are consistent with the literature.<sup>[1,7]</sup>

### (2E,4E)-5-(dibenzylamino)-1-(*p*-tolyl)penta-2,4-dien-1-one (15c)

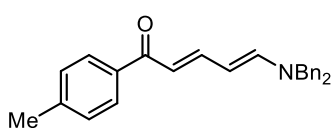

Prepared according to *General Procedure B* using 2-(*p*-tolyl)pyridine (0.17mL, 1 mmol), Tf<sub>2</sub>O (169 μL, 1 mmol), Bn<sub>2</sub>NH (179 μL, 1.2 mmol), collidine (132 μL, 1 mmol), and K<sub>2</sub>CO<sub>3</sub> (276.4 mg, 2 mmol) to yield the titled compound as a yellow solid (290 mg, 79%).

**<sup>1</sup>H NMR** (400 MHz, CDCl<sub>3</sub>) δ 7.83 (d, *J* = 7.9 Hz, 2H), 7.66 (dd, *J* = 14.3, 11.6 Hz, 1H), 7.45 – 7.31 (m, 6H), 7.23 – 7.18 (m, 6H), 7.13 (d, *J* = 12.8 Hz, 1H), 6.62 (d, *J* = 14.2 Hz, 1H), 5.54 (t, *J* = 12.2 Hz, 1H), 4.35 (s, 4H), 2.39 (s, 3H).

**<sup>13</sup>C NMR** (101 MHz, CDCl<sub>3</sub>) δ 189.4, 152.1, 148.4, 142.0, 137.2, 136.2, 129.0, 129.0, 128.2, 128.0, 127.6, 113.8, 98.9, 21.7.

**HRMS** (+APCI): Calculated for: C<sub>26</sub>H<sub>26</sub>NO [M+H]<sup>+</sup> 368.2014, found 368.2014.

The data are consistent with the literature.<sup>[1]</sup>

### (2E,4E)-5-(dibenzylamino)-1-(4-methoxyphenyl)penta-2,4-dien-1-one (15d)

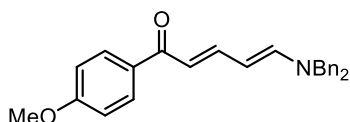

Prepared according to *General Procedure B* using 2-(4-methoxyphenyl)pyridine (185.3 mg, 1 mmol), Tf<sub>2</sub>O (169 μL, 1 mmol), Bn<sub>2</sub>NH (179 μL, 1.2 mmol), collidine (132 μL, 1 mmol), and K<sub>2</sub>CO<sub>3</sub> (276.4 mg, 2 mmol) to yield the titled compound as a yellow solid (264.2 mg, 70%).

**<sup>1</sup>H NMR** (400 MHz, CDCl<sub>3</sub>) δ 8.02 – 7.88 (m, 2H), 7.66 (dd, *J* = 14.2, 11.6 Hz, 1H), 7.39 – 7.29 (m, 6H), 7.24 – 7.16 (m, 4H), 7.13 (d, *J* = 12.8 Hz, 1H), 6.93 – 6.88 (m, 2H), 6.62 (d, *J* = 14.2 Hz, 1H), 5.54 (t, *J* = 12.2 Hz, 1H), 4.35 (s, 4H), 3.85 (s, 3H).

**<sup>13</sup>C NMR** (101 MHz, CDCl<sub>3</sub>) δ 188.3, 162.5, 152.0, 148.0, 136.2, 132.6, 130.1, 129.0, 128.0, 127.6, 113.5, 98.9, 55.5.

**HRMS** (+APCI): Calculated for: C<sub>26</sub>H<sub>26</sub>NO<sub>2</sub> [M+H]<sup>+</sup> 384.1964, found 384.1958.

The data are consistent with the literature.<sup>[1]</sup>

### (2E,4E)-5-(dibenzylamino)-1-(4-vinylphenyl)penta-2,4-dien-1-one (15e)

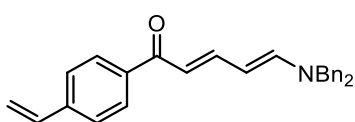

Prepared according to *General Procedure B* using 2-(4-vinylphenyl)pyridine (181.1 mg, 1 mmol), Tf<sub>2</sub>O (169 μL, 1 mmol), Bn<sub>2</sub>NH (179 μL, 1.2 mmol), collidine (132 μL, 1 mmol), and K<sub>2</sub>CO<sub>3</sub> (276.4 mg, 2 mmol) to yield the titled compound as a yellow solid (276.8 mg, 73%).

**<sup>1</sup>H NMR** (500 MHz, CDCl<sub>3</sub>) δ 7.92 – 7.86 (m, 2H), 7.67 (dd, *J* = 14.2, 11.6 Hz, 1H), 7.47 – 7.42 (m, 2H), 7.40 – 7.28 (m, 6H), 7.19 (dd, *J* = 6.9, 1.8 Hz, 4H), 7.15 (d, *J* = 12.8 Hz, 1H), 6.74 (dd, *J* = 17.6, 10.9 Hz, 1H), 6.61 (d, *J* = 14.3 Hz, 1H), 5.83 (d, *J* = 17.7 Hz, 1H), 5.56 (t, *J* = 12.2 Hz, 1H), 5.33 (d, *J* = 11.1 Hz, 1H), 4.36 (s, 4H).

**<sup>13</sup>C NMR** (101 MHz, CDCl<sub>3</sub>) δ 189.0, 152.4, 148.8, 140.6, 139.2, 136.4, 136.1, 129.0, 128.4, 128.0, 127.6, 126.2, 115.7, 113.7, 99.0.

**HRMS** (+APCI): Calculated for: C<sub>27</sub>H<sub>26</sub>NO [M+H]<sup>+</sup> 380.2014, found 380.2002.

**Melting Point:** 98 – 100 °C.

**(2E,4E)-1-([1,1'-biphenyl]-4-yl)-5-(dibenzylamino)penta-2,4-dien-1-one (15f)**

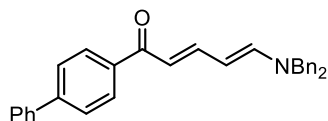

Prepared according to *General Procedure B* using 2-([1,1'-biphenyl]-4-yl)pyridine (231.1 mg, 1 mmol), Tf<sub>2</sub>O (169 μL, 1 mmol), Bn<sub>2</sub>NH (179 μL, 1.2 mmol), collidine (132 μL, 1 mmol), and K<sub>2</sub>CO<sub>3</sub> (276.4 mg, 2 mmol) to yield the titled compound as a yellow solid (321.9 mg, 75%).

**<sup>1</sup>H NMR** (400 MHz, CDCl<sub>3</sub>) δ 8.00 (d, *J* = 7.8 Hz, 2H), 7.78 – 7.59 (m, 5H), 7.45 (t, *J* = 7.3 Hz, 2H), 7.35 (dt, *J* = 13.0, 6.9 Hz, 7H), 7.18 (dd, *J* = 16.1, 10.0 Hz, 5H), 6.66 (d, *J* = 14.2 Hz, 1H), 5.58 (t, *J* = 12.2 Hz, 1H), 4.37 (s, 4H).

**<sup>13</sup>C NMR** (101 MHz, CDCl<sub>3</sub>) δ 189.2, 152.4, 148.9, 144.2, 140.5, 138.7, 136.1, 129.1, 129.0, 128.6, 128.1, 127.9, 127.6, 127.4, 127.0, 113.7, 99.0.

**HRMS** (+APCI): Calculated for: C<sub>31</sub>H<sub>28</sub>NO [M+H]<sup>+</sup> 430.2171, found 430.2169.

The data are consistent with the literature.<sup>[1]</sup>

**(2E,4E)-1-(4-bromophenyl)-5-(dibenzylamino)penta-2,4-dien-1-one (15g)**

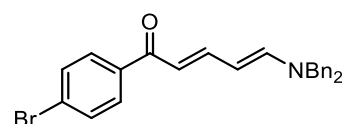

Prepared according to *General Procedure B* using 2-(4-bromophenyl)pyridine (234.1 mg, 1 mmol), Tf<sub>2</sub>O (169 μL, 1 mmol), Bn<sub>2</sub>NH (179 μL, 1.2 mmol), collidine (132 μL, 1 mmol), and K<sub>2</sub>CO<sub>3</sub> (276.4 mg, 2 mmol) to yield the titled compound as a yellow solid (310.4 mg, 72%).

**<sup>1</sup>H NMR** (500 MHz, CDCl<sub>3</sub>) δ 7.77 (d, *J* = 8.3 Hz, 2H), 7.67 (dd, *J* = 14.2, 11.7 Hz, 1H), 7.54 (d, *J* = 8.3 Hz, 2H), 7.34 (dq, *J* = 14.3, 7.1 Hz, 6H), 7.21 – 7.13 (m, 5H), 6.54 (d, *J* = 14.2 Hz, 1H), 5.55 (t, *J* = 12.2 Hz, 1H), 4.36 (s, 4H).

**<sup>13</sup>C NMR** (101 MHz, CDCl<sub>3</sub>) δ 188.4, 152.8, 149.5, 138.7, 135.9, 131.6, 129.7, 129.1, 128.1, 127.6, 126.2, 113.1, 99.0.

**HRMS** (+APCI): Calculated for: C<sub>25</sub>H<sub>23</sub>BrNO [M+H]<sup>+</sup> 432.0963, found 432.0964.

The data are consistent with the literature.<sup>[1]</sup>

**(2E,4E)-5-(dibenzylamino)-1-(2,4-difluorophenyl)penta-2,4-dien-1-one (15h)**

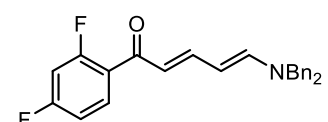

Prepared according to *General Procedure B* using 2-(2,4-difluorophenyl)pyridine (0.15 mL, 1 mmol), Tf<sub>2</sub>O (169 μL, 1 mmol), Bn<sub>2</sub>NH (179 μL, 1.2 mmol), collidine (132 μL, 1 mmol), and K<sub>2</sub>CO<sub>3</sub> (276.4 mg, 2 mmol) to yield the titled compound as a yellow solid (233.5 mg, 60%).

**<sup>1</sup>H NMR** (500 MHz, CDCl<sub>3</sub>) δ 7.78 (td, *J* = 8.5, 6.7 Hz, 1H), 7.63 – 7.56 (m, 1H), 7.35 (dp, *J* = 14.3, 6.9 Hz, 6H), 7.18 (d, *J* = 7.4 Hz, 4H), 7.14 (d, *J* = 12.7 Hz, 1H), 6.91 (td, *J* = 8.2, 2.4 Hz, 1H), 6.81 (ddd, *J* = 11.0, 8.8, 2.4 Hz, 1H), 6.42 (dd, *J* = 14.3, 2.9 Hz, 1H), 5.55 (t, *J* = 12.2 Hz, 1H), 4.35 (s, 4H).

**<sup>19</sup>F NMR** (376 MHz, CDCl<sub>3</sub>) δ -106.05, -107.18.

**<sup>13</sup>C NMR** (101 MHz, CDCl<sub>3</sub>) δ 186.4 (d, *J* = 3.2 Hz), 164.1 (dd, *J* = 313.7, 12.0 Hz), 161.6 (dd, *J* = 315.0, 12.2 Hz), 153.0, 149.7, 135.9, 132.5 (dd, *J* = 10.2, 4.8 Hz), 129.0, 128.1, 127.6, 125.2 (dd, *J* = 14.3, 3.7 Hz), 117.2 (d, *J* = 6.8 Hz), 111.6 (dd, *J* = 21.1, 3.6 Hz), 104.4 (dd, *J* = 27.6, 25.2 Hz), 99.0.

**HRMS** (+APCI): Calculated for: C<sub>25</sub>H<sub>22</sub>F<sub>2</sub>NO [M+H]<sup>+</sup> 390.1669, found 390.1666.

The data are consistent with the literature.<sup>[1]</sup>

**(2Z,4E)-1-([1,1'-biphenyl]-4-yl)-5-(dibenzylamino)-3-phenylpenta-2,4-dien-1-one (15i)**

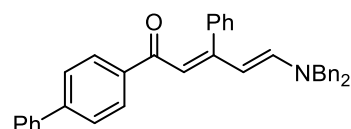

Prepared according to *General Procedure B* using 2-([1,1'-biphenyl]-4-yl)-4-phenylpyridine (307 mg, 1 mmol), Tf<sub>2</sub>O (169 μL, 1 mmol), Bn<sub>2</sub>NH (179 μL, 1.2 mmol), collidine (132 μL, 1 mmol), and K<sub>2</sub>CO<sub>3</sub> (276.4 mg, 2 mmol) to yield the titled compound as a yellow solid (257.7 mg, 51%).

**<sup>1</sup>H NMR** (400 MHz, CDCl<sub>3</sub>) δ 7.91 (d, *J* = 8.0 Hz, 2H), 7.81 (d, *J* = 13.5 Hz, 1H), 7.53 (d, *J* = 7.9 Hz, 4H), 7.36 (d, *J* = 7.1 Hz, 6H), 7.31 (d, *J* = 5.5 Hz, 3H), 7.25 (d, *J* = 7.5 Hz, 4H), 7.13 (d, *J* = 19.8 Hz, 5H), 6.89 (d, *J* = 13.4 Hz, 1H), 6.25 (s, 1H), 4.36 (s, 4H).

**<sup>13</sup>C NMR** (101 MHz, CDCl<sub>3</sub>) δ 189.2, 160.9, 153.9, 143.7, 142.3, 140.6, 140.5, 136.2, 130.5, 129.2, 128.9, 128.3, 128.2, 128.2, 127.9, 127.8, 127.3, 127.0, 111.3, 99.7.

**HRMS** (+APCI): Calculated for: C<sub>37</sub>H<sub>32</sub>NO [M+H]<sup>+</sup> 506.2484, found 506.2467.

**Melting Point:** 88 – 90 °C.

### (2Z,4E)-5-(dibenzylamino)-1-(naphthalen-2-yl)-3-phenylpenta-2,4-dien-1-one (15j)

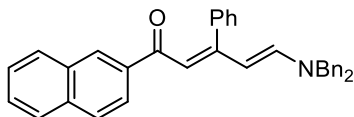

Prepared according to *General Procedure B* using 2-(naphthalen-2-yl)-4-phenylpyridine (281 mg, 1 mmol), Tf<sub>2</sub>O (169 μL, 1 mmol), Bn<sub>2</sub>NH (179 μL, 1.2 mmol), collidine (132 μL, 1 mmol), and K<sub>2</sub>CO<sub>3</sub> (276.4 mg, 2 mmol) to yield the titled compound as a yellow solid (220.4 mg, 46%).

**<sup>1</sup>H NMR** (400 MHz, CDCl<sub>3</sub>) δ 8.43 (d, *J* = 1.7 Hz, 1H), 8.07 – 8.04 (m, 1H), 7.96 – 7.82 (m, 5H), 7.53 – 7.47 (m, 5H), 7.44 – 7.41 (m, 2H), 7.36 (t, *J* = 7.0 Hz, 5H), 7.32 (d, *J* = 1.5 Hz, 1H), 7.24 – 7.17 (m, 3H), 7.00 (d, *J* = 13.5 Hz, 1H), 6.47 (s, 1H), 4.36 (s, 4H).

**<sup>13</sup>C NMR** (126 MHz, CDCl<sub>3</sub>) δ 189.4, 160.9, 153.9, 142.3, 138.9, 136.1, 134.7, 132.8, 130.2, 129.3, 129.2, 128.8, 128.2, 128.1, 127.9, 127.9, 127.6, 127.3, 126.2, 124.7, 111.3, 99.6.

**HRMS** (+APCI): C<sub>35</sub>H<sub>30</sub>NO [M+H]<sup>+</sup> 480.2327, found 480.2324.

**Melting Point:** 88 – 90 °C.

### (2E,4E)-5-(dibenzylamino)-1-(thiophen-3-yl)penta-2,4-dien-1-one (15k)

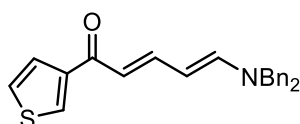

Prepared according to *General Procedure B* using 2-(3-thienyl)pyridine (0.15 mL, 1 mmol), Tf<sub>2</sub>O (169 μL, 1 mmol), Bn<sub>2</sub>NH (179 μL, 1.2 mmol), collidine (132 μL, 1 mmol), and K<sub>2</sub>CO<sub>3</sub> (276.4 mg, 2 mmol) to yield the titled compound as a yellow solid (233.7 mg, 65%).

**<sup>1</sup>H NMR** (400 MHz, CDCl<sub>3</sub>) δ 7.95 (dd, *J* = 2.9, 1.3 Hz, 1H), 7.65 (dd, *J* = 14.3, 11.7 Hz, 1H), 7.56 (dt, *J* = 6.4, 3.2 Hz, 1H), 7.39 – 7.30 (m, 6H), 7.29 – 7.26 (m, 1H), 7.23 – 7.17 (m, 4H), 7.13 (d, *J* = 12.7 Hz, 1H), 6.48 (d, *J* = 14.2 Hz, 1H), 5.52 (t, *J* = 12.2 Hz, 1H), 4.35 (s, 4H).

**<sup>13</sup>C NMR** (126 MHz, CDCl<sub>3</sub>) δ 183.7, 152.2, 148.1, 144.5, 136.1, 129.7, 129.0, 128.0, 127.5, 125.7, 114.5, 98.7.

**HRMS** (+APCI): Calculated for: C<sub>23</sub>H<sub>22</sub>NOS [M+H]<sup>+</sup> 360.1422, found 360.1421.

**Melting Point:** 92 – 94 °C.

The data are consistent with the literature.<sup>[1]</sup>

### (2E,4E)-5-(dibenzylamino)-1-(furan-3-yl)penta-2,4-dien-1-one (15l)

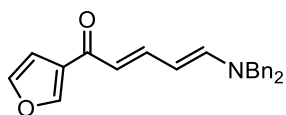

Prepared according to *General Procedure B* using 2-(furan-3-yl)pyridine (145 mg, 1 mmol), Tf<sub>2</sub>O (169 μL, 1 mmol), Bn<sub>2</sub>NH (179 μL, 1.2 mmol), collidine (132 μL, 1 mmol), and K<sub>2</sub>CO<sub>3</sub> (276.4 mg, 2 mmol) to yield the titled compound as a yellow solid (195.5 mg, 57%).

**<sup>1</sup>H NMR** (400 MHz, CDCl<sub>3</sub>) δ 7.95 (s, 1H), 7.62 (t, *J* = 12.9 Hz, 1H), 7.36 (td, *J* = 13.4, 6.6 Hz, 7H), 7.19 (d, *J* = 7.2 Hz, 4H), 7.12 (d, *J* = 12.9 Hz, 1H), 6.80 (s, 1H), 6.27 (d, *J* = 14.3 Hz, 1H), 5.47 (t, *J* = 12.2 Hz, 1H), 4.35 (s, 4H).

**<sup>13</sup>C NMR** (126 MHz, CDCl<sub>3</sub>) δ 183.8, 152.2, 147.4, 145.8, 143.6, 136.1, 129.2, 129.0, 128.0, 127.6, 114.9, 109.4, 98.4.

**HRMS** (+APCI): Calculated for: C<sub>23</sub>H<sub>22</sub>NO<sub>2</sub> [M+H]<sup>+</sup> 344.1651, found 344.1647.

The data are consistent with the literature.<sup>[1]</sup>

### (2E,4E)-5-(dibenzylamino)-1-(6-(trifluoromethyl)pyridin-3-yl)penta-2,4-dien-1-one (15m)

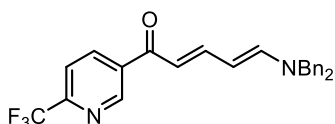

Prepared according to *General Procedure B* using 6'-(trifluoromethyl)-2,3'-bipyridine (224 mg, 1 mmol), Tf<sub>2</sub>O (169 μL, 1 mmol), Bn<sub>2</sub>NH (179 μL, 1.2 mmol), collidine (132 μL, 1 mmol), and K<sub>2</sub>CO<sub>3</sub> (276.4 mg, 2 mmol) to yield the titled compound as a yellow oil (177.3 mg, 42%).

**<sup>1</sup>H NMR** (400 MHz, Acetone) δ 9.15 (d, *J* = 2.0 Hz, 1H), 8.45 (dd, *J* = 8.1, 2.1 Hz, 1H), 7.92 (dd, *J* = 8.2, 0.9 Hz, 1H), 7.72 (dd, *J* = 14.1, 11.8 Hz, 1H), 7.64 (d, *J* = 12.6 Hz, 1H), 7.43–7.29 (m, 10H), 6.61 (d, *J* = 14.1 Hz, 1H), 5.66 (t, *J* = 12.2 Hz, 1H), 4.55 (s, 4H).

**<sup>19</sup>F NMR** (376 MHz, CDCl<sub>3</sub>) δ -68.48.

**<sup>13</sup>C NMR** (101 MHz, CDCl<sub>3</sub>) δ 186.2, 154.3, 151.4, 149.6 (q, *J* = 33.9 Hz), 137.7, 137.0, 135.5, 130.5, 129.2, 128.3, 127.6, 121.5 (q, *J* = 274.4 Hz), 120.3 (d, *J* = 2.7 Hz), 112.3, 99.3.

**HRMS** (+APCI): Calculated for: C<sub>25</sub>H<sub>22</sub>F<sub>3</sub>N<sub>2</sub>O [M+H]<sup>+</sup> 423.1684, found 423.1676.

### (2E,4E)-1-(dibenzo[b,d]furan-3-yl)-5-(dibenzylamino)penta-2,4-dien-1-one (15n)

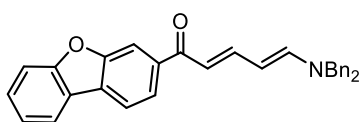

Prepared according to *General Procedure B* using 2-(dibenzo[b,d]furan-3-yl)pyridine (245.3 mg, 1 mmol), Tf<sub>2</sub>O (169 μL, 1 mmol), Bn<sub>2</sub>NH (179 μL, 1.2 mmol), collidine (132 μL, 1 mmol), and K<sub>2</sub>CO<sub>3</sub> (276.4 mg, 2 mmol) to yield the titled compound as a yellow solid (243.75 mg, 55%).

**<sup>1</sup>H NMR** (400 MHz, CDCl<sub>3</sub>) δ 8.14 (t, *J* = 1.0 Hz, 1H), 8.00–7.95 (m, 3H), 7.74 (dd, *J* = 14.1, 11.7 Hz, 1H), 7.59 (dt, *J* = 8.3, 1.0 Hz, 1H), 7.49 (ddt, *J* = 8.4, 7.1, 1.2 Hz, 1H), 7.40–7.31 (m, 7H), 7.23–7.16 (m, 5H), 6.71 (d, *J* = 14.2 Hz, 1H), 5.60 (t, *J* = 12.2 Hz, 1H), 4.38 (s, 4H).

**<sup>13</sup>C NMR** (101 MHz, CDCl<sub>3</sub>) δ 188.9, 157.4, 156.2, 152.6, 149.2, 139.2, 136.0, 130.5, 129.1, 128.1, 127.6, 127.2, 123.9, 123.1, 123.0, 121.3, 120.3, 113.7, 112.0, 111.5, 99.1

**HRMS** (+APCI): Calculated for: C<sub>31</sub>H<sub>26</sub>NO<sub>2</sub> [M+H]<sup>+</sup> 444.1964, found 444.1960.

**Melting Point:** 96–98 °C.

### (2E,4E)-5-(dibenzylamino)-1-(9-phenyl-9H-carbazol-3-yl)penta-2,4-dien-1-one (15o)

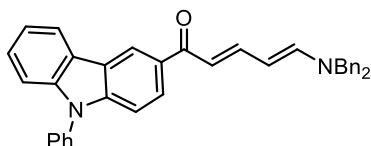

Prepared according to *General Procedure B* using 9-phenyl-3-(pyridin-2-yl)-9H-carbazole (320.4 mg, 1 mmol), Tf<sub>2</sub>O (169 μL, 1 mmol), Bn<sub>2</sub>NH (179 μL, 1.2 mmol), collidine (132 μL, 1 mmol), and K<sub>2</sub>CO<sub>3</sub> (276.4 mg, 2 mmol) to yield the titled compound as an orange solid (300.7 mg, 58%).

**<sup>1</sup>H NMR** (500 MHz, CDCl<sub>3</sub>) δ 8.82 (s, 1H), 8.20 (d, *J* = 7.8 Hz, 1H), 8.12–8.03 (m, 1H), 7.77 (dd, *J* = 14.2, 11.6 Hz, 1H), 7.62 (t, *J* = 7.7 Hz, 2H), 7.56 (d, *J* = 7.7 Hz, 2H), 7.49 (t, *J* = 7.4 Hz, 1H), 7.42–7.35 (m, 7H), 7.33 (t, *J* = 7.0 Hz, 3H), 7.22 (d, *J* = 7.4 Hz, 4H), 7.17 (d, *J* = 12.8 Hz, 1H), 6.87 (d, *J* = 14.2 Hz, 1H), 5.63 (t, *J* = 12.2 Hz, 1H), 4.37 (s, 4H).

**<sup>13</sup>C NMR** (126 MHz, CDCl<sub>3</sub>) δ 189.0, 151.8, 147.8, 143.0, 141.7, 137.3, 136.2, 132.1, 130.1, 129.0, 127.9, 127.9, 127.5, 127.2, 126.7, 126.4, 123.8, 123.2, 121.2, 120.7, 120.7, 114.0, 110.2, 109.3, 99.0.

**HRMS** (+APCI): Calculated for: C<sub>37</sub>H<sub>31</sub>N<sub>2</sub>O [M+H]<sup>+</sup> 519.2436, found 519.2441.

The data are consistent with the literature.<sup>[1]</sup>

### (2E,4E)-5-(dibenzylamino)-1-(2-methylbenzofuro[2,3-b]pyridin-7-yl)penta-2,4-dien-1-one (15p)

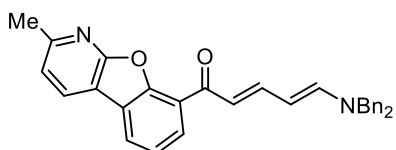

Prepared according to *General Procedure B* using 2-methyl-7-(pyridin-2-yl)benzofuro[2,3-b]pyridine (261 mg, 1 mmol), Tf<sub>2</sub>O (169 μL, 1 mmol), Bn<sub>2</sub>NH (179 μL, 1.2 mmol), collidine (132 μL, 1 mmol), and K<sub>2</sub>CO<sub>3</sub> (276.4 mg, 2 mmol) to yield the titled compound as an orange solid (265.75 mg, 58%).

**<sup>1</sup>H NMR** (500 MHz, CDCl<sub>3</sub>) δ 8.13 (td, *J* = 6.0, 2.9 Hz, 2H), 7.97 (dd, *J* = 7.6, 1.4 Hz, 1H), 7.84 (dd, *J* = 14.2, 11.8 Hz, 1H), 7.42 (t, *J* = 7.7 Hz, 1H), 7.37 (t, *J* = 7.4 Hz, 4H), 7.31 (t, *J* = 7.2 Hz, 2H), 7.24–7.16 (m, 7H), 5.75 (t, *J* = 12.2 Hz, 1H), 4.38 (s, 4H), 2.69 (s, 3H).

**<sup>13</sup>C NMR** (101 MHz, CDCl<sub>3</sub>) δ 186.0, 163.0, 156.7, 153.0, 152.3, 149.5, 136.0, 130.0, 129.1, 129.0, 128.0, 127.6,

125.5, 123.8, 123.6, 123.4, 119.2, 117.3, 113.5, 99.8, 24.6.

**HRMS** (+APCI): Calculated for: C<sub>31</sub>H<sub>27</sub>O<sub>2</sub>N<sub>2</sub> [M+H]<sup>+</sup> 459.2073, found 459.2067.

The data are consistent with the literature.<sup>[1]</sup>

### (2E,4E)-5-(dibenzylamino)-1-(3-((5-(4-fluorophenyl)thiophen-2-yl)methyl)-4-methylphenyl)penta-2,4-dien-1-one (15q)

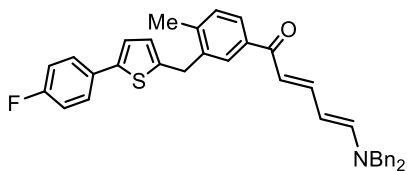

Prepared according to *General Procedure B* using 2-(3-((5-(4-fluorophenyl)thiophen-2-yl)methyl)-4-methylphenyl)pyridine (360 mg, 1 mmol), Tf<sub>2</sub>O (169 μL, 1 mmol), Bn<sub>2</sub>NH (179 μL, 1.2 mmol), collidine (132 μL, 1 mmol), and K<sub>2</sub>CO<sub>3</sub> (276.4 mg, 2 mmol) to yield the titled compound as a yellow solid (334.2 mg, 60%).

**<sup>1</sup>H NMR** (500 MHz, CDCl<sub>3</sub>) δ 7.83 (d, *J* = 1.9 Hz, 1H), 7.75 (dd, *J* = 7.9, 1.9 Hz, 1H), 7.67 (dd, *J* = 14.2, 11.6 Hz, 1H), 7.47 – 7.44 (m, 2H), 7.36 (dd, *J* = 8.0, 6.2 Hz, 4H), 7.32 (d, *J* = 7.1 Hz, 2H), 7.25 – 7.14 (m, 5H), 7.13 (d, *J* = 12.7 Hz, 1H), 7.04 – 6.98 (m, 3H), 6.65 (d, *J* = 3.6 Hz, 1H), 6.61 (d, *J* = 14.3 Hz, 1H), 5.55 (t, *J* = 12.2 Hz, 1H), 4.34 (s, 4H), 4.16 (s, 2H), 2.35 (s, 3H).

**<sup>19</sup>F NMR** (376 MHz, CDCl<sub>3</sub>) δ -115.21.

**<sup>13</sup>C NMR** (126 MHz, CDCl<sub>3</sub>) δ 189.4, 162.2 (d, *J* = 246.6 Hz), 152.3, 148.7, 143.3, 141.6, 140.6, 138.1 (d, *J* = 9.8 Hz), 136.1, 130.6, 129.5, 129.0, 128.0, 127.6, 127.2 (d, *J* = 7.9 Hz), 126.9, 126.1, 122.8, 115.8 (d, *J* = 21.9 Hz), 113.8, 99.0, 34.4, 19.7.

**HRMS** (+APCI): Calculated for: C<sub>37</sub>H<sub>33</sub>FNOS [M+H]<sup>+</sup> 558.2267, found 558.2259.

**Melting Point:** 98 – 99 °C.

## 7. Synthesis of Zincke Imines

### *N*-((1E,2Z,4E)-5-(dibenzylamino)-3-phenylpenta-2,4-dien-1-ylidene)-1,1,1-trifluoromethanesulfonamide (15r)

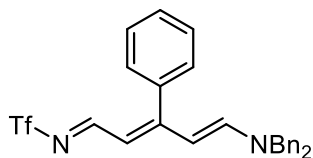

Prepared according to *General Procedure C* using 4-phenylpyridine (154 mg, 1 mmol), Tf<sub>2</sub>O (169 μL, 1 mmol), Bn<sub>2</sub>NH (179 μL, 1.2 mmol), and collidine (132 μL, 1 mmol) to yield the titled compound as an yellow solid (397 mg, 82%)

**<sup>1</sup>H NMR** (400 MHz, CDCl<sub>3</sub>) δ 7.95 (d, *J* = 11.4 Hz, 1H), 7.44 – 7.35 (m, 10H), 7.20 (dd, *J* = 19.9, 6.8 Hz, 4H), 7.04 (d, *J* = 8.8 Hz, 2H), 6.31 (d, *J* = 11.4 Hz, 1H), 5.97 (d, *J* = 12.4 Hz, 1H), 4.52 (s, 2H), 4.33 (s, 2H).

**<sup>19</sup>F NMR** (376 MHz, CDCl<sub>3</sub>) δ -77.81.

**<sup>13</sup>C NMR** (101 MHz, CDCl<sub>3</sub>) δ 174.9, 173.4, 157.0, 134.8, 133.8, 133.7, 130.6, 129.8, 129.6, 129.4, 129.2, 129.1, 128.1, 127.4, 120.0 (q, *J* = 323.8 Hz), 117.7, 105.6, 60.3, 52.0.

The data are consistent with the literature.<sup>[7]</sup>

### *N*-((1E,2Z,4E)-5-(dibenzylamino)-3-(3-vinylphenyl)penta-2,4-dien-1-ylidene)-1,1,1-trifluoromethanesulfonamide (15s)

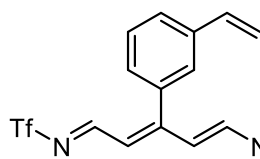

Prepared according to *General Procedure C* using 4-(3-vinylphenyl)pyridine (245.3 mg, 1 mmol), Tf<sub>2</sub>O (169 μL, 1 mmol), Bn<sub>2</sub>NH (179 μL, 1.2 mmol), and collidine (132 μL, 1 mmol) to yield the titled compound as an orange solid (423.8 mg, 82%).

**<sup>1</sup>H NMR** (400 MHz, CDCl<sub>3</sub>) δ 7.98 (d, *J* = 11.4 Hz, 1H), 7.48 (d, *J* = 7.8 Hz, 1H), 7.41 – 7.34 (m, 8H), 7.25 – 7.12 (m, 4H), 7.06 – 7.02 (m, 2H), 6.71 (dd, *J* = 17.6, 10.9 Hz, 1H), 6.31 (d, *J* = 11.3 Hz, 1H), 5.97 (d, *J* = 12.5 Hz, 1H), 5.78 (d, *J* = 17.5 Hz, 1H), 5.34 (d, *J* = 10.9 Hz, 1H), 4.52 (s, 2H), 4.33 (s, 2H).

**<sup>19</sup>F NMR** (376 MHz, CDCl<sub>3</sub>) δ -77.81.

**<sup>13</sup>C NMR** (101 MHz, CDCl<sub>3</sub>) δ 174.6, 173.4, 156.8, 138.0, 136.0, 133.8, 133.7, 130.6, 129.4, 129.1, 129.1, 129.0, 128.9, 128.7, 128.2, 127.6, 127.4, 120.0 (q, *J* = 324.2 Hz), 117.6, 115.5, 105.5, 60.2, 52.1.

**HRMS** (+APCI): Calculated for: C<sub>28</sub>H<sub>26</sub>F<sub>3</sub>N<sub>2</sub>O<sub>2</sub>S [M+H]<sup>+</sup> 511.1667, found 511.1662.

**Melting Point:** 98 – 100 °C.

***N*-((1*E*,2*Z*,4*E*)-5-(dibenzylamino)-3-(4-methoxyphenyl)penta-2,4-dien-1-ylidene)-1,1,1-trifluoromethanesulfonamide (15t)**

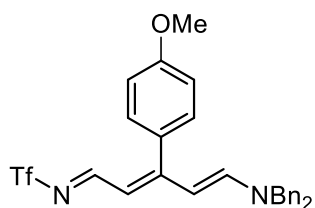

Prepared according to *General Procedure C* using 4-(4-methoxyphenyl)pyridine (245.3 mg, 1 mmol), Tf<sub>2</sub>O (169 μL, 1 mmol), Bn<sub>2</sub>NH (179 μL, 1.2 mmol), and collidine (132 μL, 1 mmol) to yield the titled compound as a yellow solid (421.6 mg, 82%).

**<sup>1</sup>H NMR** (400 MHz, CDCl<sub>3</sub>) δ 8.00 (d, *J* = 10.7 Hz, 1H), 7.38 (p, *J* = 7.9 Hz, 7H), 7.18 (d, *J* = 7.4 Hz, 4H), 7.10 – 7.05 (m, 2H), 6.94 – 6.89 (m, 2H), 6.29 (d, *J* = 11.6 Hz, 1H), 5.95 (d, *J* = 12.5 Hz, 1H), 4.51 (s, 2H), 4.36 (s, 2H), 3.86 (s, 3H).

**<sup>19</sup>F NMR** (376 MHz, CDCl<sub>3</sub>) δ -77.81.

**<sup>13</sup>C NMR** (101 MHz, CDCl<sub>3</sub>) δ 174.9, 173.3, 157.1, 134.0, 133.7, 131.4, 129.4, 129.1, 128.7, 128.5, 128.3, 128.1, 127.7, 127.4, 126.9, 120.1 (q, *J* = 323.2 Hz), 114.2, 105.6, 60.3, 55.5, 52.0.

**HRMS** (+APCI): Calculated for: C<sub>27</sub>H<sub>26</sub>F<sub>3</sub>N<sub>2</sub>O<sub>3</sub>S [M+H]<sup>+</sup> 515.1616, found 515.1611.

**Melting Point:** 100 – 120 °C.

***N*-((1*E*,2*Z*,4*E*)-5-(dibenzylamino)-3-(naphthalen-2-yl)penta-2,4-dien-1-ylidene)-1,1,1-trifluoromethanesulfonamide (15u)**

Prepared according to *General Procedure C* using 4-(naphthalen-2-yl)pyridine (205.1 mg, 1 mmol), Tf<sub>2</sub>O (169 μL, 1 mmol), Bn<sub>2</sub>NH (179 μL, 1.2 mmol), and collidine (132 μL, 1 mmol) to yield the titled compound as an orange solid (461 mg, 86%).

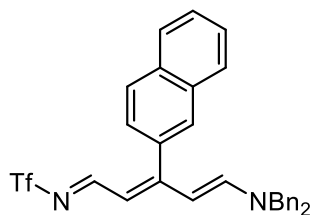

**<sup>1</sup>H NMR** (400 MHz, CDCl<sub>3</sub>) δ 8.00 (d, *J* = 12.2 Hz, 1H), 7.92 – 7.82 (m, 4H), 7.71 (s, 1H), 7.58 (h, *J* = 5.9 Hz, 3H), 7.38 (ddt, *J* = 19.1, 9.1, 4.7 Hz, 6H), 7.19 (d, *J* = 7.3 Hz, 2H), 7.03 – 6.94 (m, 2H), 6.40 (d, *J* = 11.3 Hz, 1H), 6.04 (d, *J* = 12.5 Hz, 1H), 4.53 (s, 2H), 4.27 (s, 2H).

**<sup>19</sup>F NMR** (376 MHz, CDCl<sub>3</sub>) δ -77.97.

**<sup>13</sup>C NMR** (126 MHz, CDCl<sub>3</sub>) δ 174.9, 173.4, 159.3, 157.1, 150.2, 133.6, 132.7, 129.4, 129.3, 129.0, 128.7, 128.5, 128.2, 128.0, 127.4, 127.1, 127.0, 124.6, 122.0, 120.0 (q, *J* = 322.4 Hz), 117.8, 105.8, 60.2, 52.2.

**HRMS** (+APCI): Calculated for: C<sub>27</sub>H<sub>26</sub>F<sub>3</sub>N<sub>2</sub>O<sub>3</sub>S [M+H]<sup>+</sup> 535.1665, found 535.1649.

**Melting Point:** 100 – 120 °C.

***N*-((1*E*,2*Z*,4*E*)-5-(dibenzylamino)-3-(thiophen-3-yl)penta-2,4-dien-1-ylidene)-1,1,1-trifluoromethanesulfonamide (15v)**

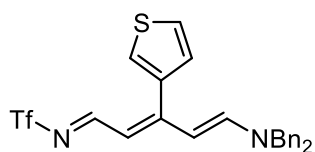

Prepared according to *General Procedure C* using 4-(thiophen-3-yl)pyridine (161 mg, 1 mmol), Tf<sub>2</sub>O (169 μL, 1 mmol), Bn<sub>2</sub>NH (179 μL, 1.2 mmol), and collidine (132 μL, 1 mmol) to yield the titled compound as a yellow solid (392 mg, 80%).

**<sup>1</sup>H NMR** (400 MHz, CDCl<sub>3</sub>) δ 8.13 (d, *J* = 10.5 Hz, 1H), 7.45 – 7.33 (m, 9H), 7.18 (d, *J* = 7.1 Hz, 2H), 7.12 – 7.03 (m, 3H), 6.30 (d, *J* = 11.0 Hz, 1H), 5.94 (d, *J* = 12.4 Hz, 1H), 4.53 (s, 2H), 4.40 (s, 2H).

**<sup>19</sup>F NMR** (376 MHz, CDCl<sub>3</sub>) δ -77.76.

**<sup>13</sup>C NMR** (101 MHz, CDCl<sub>3</sub>) δ 172.9, 169.1, 156.5, 133.9, 133.7, 130.6, 129.5, 129.1, 129.0, 128.7, 128.3, 127.4, 127.0, 125.8, 120.0 (q, *J* = 323.8 Hz), 117.6, 105.3, 60.3, 52.2.

**HRMS** (+APCI): Calculated for: C<sub>24</sub>H<sub>22</sub>F<sub>2</sub>N<sub>2</sub>O<sub>2</sub>S<sub>2</sub> [M+H]<sup>+</sup> 491.1075, found 491.1059.

**Melting Point:** 88 – 90 °C.

## ***N*-((1*E*,2*Z*,4*E*)-5-(dibenzylamino)-3-methoxypenta-2,4-dien-1-ylidene)-1,1,1-trifluoromethanesulfonamide(15w)**

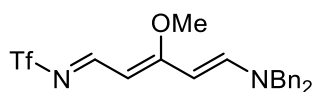

Prepared according to *General Procedure C* using 4-methoxypyridine (109.1 mg, 1 mmol), Tf<sub>2</sub>O (169 μL, 1 mmol), Bn<sub>2</sub>NH (150 μL, 1 mmol), and collidine (132 μL, 1 mmol) to yield the titled compound as a greenish-yellow oil (262.9 mg, 60%).

<sup>1</sup>H NMR (400 MHz, CDCl<sub>3</sub>) δ 8.53 (d, *J* = 11.4 Hz, 1H), 7.95 (d, *J* = 12.3 Hz, 1H), 7.43 – 7.32 (m, 6H), 7.22 – 7.14 (m, 4H), 5.80 (d, *J* = 11.4 Hz, 1H), 5.57 (d, *J* = 12.4 Hz, 1H), 4.55 (s, 2H), 4.41 (s, 2H), 3.89 (s, 3H).

<sup>19</sup>F NMR (376 MHz, CDCl<sub>3</sub>) δ -77.88.

<sup>13</sup>C NMR (101 MHz, CDCl<sub>3</sub>) δ 168.8, 166.0, 153.1, 130.7, 129.3, 129.1, 128.8, 128.4, 127.9, 127.9, 127.3, 120.0 (q, *J* = 322.8 Hz), 97.1, 87.3, 60.4, 57.1, 51.5.

HRMS (+APCI): Calculated for: C<sub>21</sub>H<sub>22</sub>F<sub>3</sub>N<sub>2</sub>O<sub>3</sub>S [M+H]<sup>+</sup> 439.1303, found 439.1295.

## **8. Synthesis of Rearranged Pyridine Products**

### **phenyl(2-(trifluoromethyl)pyridin-3-yl)methanone (17a)**

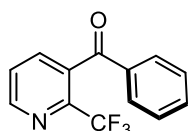

Prepared according to *General Procedure D* using corresponding Zincke ketone (70 mg, 0.2 mmol), TFAA (32 μL, 0.22 mmol), DMAP (4.88 mg, 0.04 mmol), NEt<sub>3</sub> (55.8 μL, 0.4 mmol), and NH<sub>4</sub>OAc (155.7 mg, 2 mmol) to yield the titled compound as a colorless oil (43 mg, 80%).

#### ***Gram-scale reaction***

Prepared according to *General Procedure C* using corresponding Zincke ketone (1.1 g, 3 mmol), TFAA (0.46 mL, 3.3 mmol), DMAP (73.3 mg, 0.6 mmol), NEt<sub>3</sub> (0.84 mL, 0.6 mmol), and NH<sub>4</sub>OAc (2.34 g, 30 mmol) to yield the titled compound as a colorless oil (620 mg, 80%).

#### ***Telescope reaction***

*Step 1:* Prepared according to *General Procedure B* using 2-phenylpyridine (31.04 mg, 0.2 mmol), Tf<sub>2</sub>O (33.9 μL, 0.2 mmol), Bn<sub>2</sub>NH (35.8 μL, 0.24 mmol), collidine (26.4 μL, 0.2 mmol), and K<sub>2</sub>CO<sub>3</sub> (55.3 mg, 0.4 mmol) to yield the crude product. The organic layer was separated, and the aqueous layer was washed with EtOAc (10 mL × 3). The combined organic layers were washed with brine, dried over Na<sub>2</sub>SO<sub>4</sub>, and concentrated under reduced pressure. The crude product was dried under vacuum.

*Step 2:* Prepared according to *General Procedure C* using the crude product, TFAA (67.8 μL, 0.4 mmol), DMAP (9.76 mg, 0.08 mmol), NEt<sub>3</sub> (111.6 μL, 0.8 mmol), and NH<sub>4</sub>OAc (155.7 mg, 2 mmol) to yield the titled compound as a colorless oil (60%).

<sup>1</sup>H NMR (400 MHz, CDCl<sub>3</sub>) δ 8.84 (d, *J* = 4.0 Hz, 1H), 7.81 – 7.72 (m, 3H), 7.66 – 7.56 (m, 2H), 7.48 (t, *J* = 7.8 Hz, 2H).

<sup>19</sup>F NMR (377 MHz, CDCl<sub>3</sub>) δ -63.27.

<sup>13</sup>C NMR (101 MHz, CDCl<sub>3</sub>) δ 193.4, 150.4, 144.9 (q, *J* = 34.9 Hz), 136.7, 135.9, 134.5, 130.1, 128.9, 126.0, 121.3 (q, *J* = 275.5 Hz).

HRMS (+APCI): Calculated for: C<sub>13</sub>H<sub>9</sub>F<sub>3</sub>NO [M+H]<sup>+</sup> 252.0636, found 252.0634.

### **(2-(difluoromethyl)pyridin-3-yl)(phenyl)methanone (17b)**

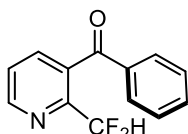

Prepared according to *General Procedure D* using corresponding Zincke ketone (70 mg, 0.2 mmol), difluoroacetic anhydride (29 μL, 0.22 mmol), DMAP (4.88 mg, 0.04 mmol), NEt<sub>3</sub> (55.8 μL, 0.4 mmol), and NH<sub>4</sub>OAc (155.7 mg, 2 mmol) to yield the titled compound as a colorless oil (37 mg, 75%).

<sup>1</sup>H NMR (400 MHz, CDCl<sub>3</sub>) δ 8.84 (dd, *J* = 4.8, 1.4 Hz, 1H), 7.82 – 7.75 (m, 3H), 7.69 – 7.59 (m, 1H), 7.53 – 7.43 (m, 3H), 6.84 (t, *J* = 54.6 Hz, 1H).

<sup>19</sup>F NMR (377 MHz, CDCl<sub>3</sub>) δ -115.05.

<sup>13</sup>C NMR (101 MHz, CDCl<sub>3</sub>) δ 194.6, 150.8, 150.2 (t, *J* = 23.6 Hz), 137.1, 136.3, 134.3, 134.0 (t, *J* = 2.2 Hz), 130.3,

128.9, 124.7, 112.2 (t,  $J = 241.7$  Hz).

**HRMS** (+APCI): Calculated for:  $C_{13}H_{10}F_2NO$   $[M+H]^+$   $[M+H]^+$  234.0730, found 234.0718.

### (2-(chlorodifluoromethyl)pyridin-3-yl)(phenyl)methanone (17c)

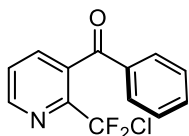

Prepared according to *General Procedure D* using corresponding Zincke ketone (70 mg, 0.2 mmol), chlorodifluoroacetic anhydride (40  $\mu$ L, 0.22 mmol), DMAP (4.88 mg, 0.04 mmol),  $NEt_3$  (55.8  $\mu$ L, 0.4 mmol), and  $NH_4OAc$  (155.7 mg, 2 mmol) to yield the titled compound as a colorless oil (48 mg, 85%).

**$^1H$  NMR** (400 MHz,  $CDCl_3$ )  $\delta$  8.88 – 8.83 (m, 1H), 7.78 – 7.71 (m, 3H), 7.63 (t,  $J = 7.4$  Hz, 1H), 7.56 (dd,  $J = 7.8, 4.7$  Hz, 1H), 7.48 (t,  $J = 7.8$  Hz, 2H).

**$^{19}F$  NMR** (376 MHz,  $CDCl_3$ )  $\delta$  -51.20.

**$^{13}C$  NMR** (101 MHz,  $CDCl_3$ )  $\delta$  193.6, 150.3, 149.0 (t,  $J = 29.2$  Hz), 136.7, 136.0, 134.5, 133.0, 130.2, 128.9, 125.5, 124.4 (t,  $J = 291.5$  Hz).

**HRMS** (+APCI): Calculated for:  $C_{13}H_9ClF_2NO$   $[M+H]^+$  268.0335, found 268.0327.

### (2-(perfluoroethyl)pyridin-3-yl)(phenyl)methanone (17d)

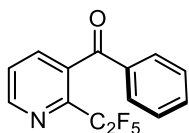

Prepared according to *General Procedure D* using corresponding Zincke ketone (70 mg, 0.2 mmol), pentafluoropropionic anhydride (46  $\mu$ L, 0.22 mmol), DMAP (4.88 mg, 0.04 mmol),  $NEt_3$  (55.8  $\mu$ L, 0.4 mmol), and  $NH_4OAc$  (155.7 mg, 2 mmol) to yield the titled compound as a colorless oil (35 mg, 55%).

**$^1H$  NMR** (400 MHz,  $CDCl_3$ )  $\delta$  8.90 – 8.84 (m, 1H), 7.79 – 7.71 (m, 3H), 7.66 – 7.57 (m, 2H), 7.48 (t,  $J = 7.8$  Hz, 2H).

**$^{19}F$  NMR** (377 MHz,  $CDCl_3$ )  $\delta$  -81.6, -110.13.

**$^{13}C$  NMR** (101 MHz,  $CDCl_3$ )  $\delta$  193.2, 150.2, 144.6 (t,  $J = 26.3$  Hz), 136.6, 136.2, 136.0, 134.5, 130.1, 128.9, 125.7, 118.8 (qt,  $J = 288.4, 36.9$  Hz), 111.9 (tq,  $J = 257.4, 38.3$  Hz).

**HRMS** (+APCI): Calculated for:  $C_{14}H_9F_5NO$   $[M+H]^+$  302.0599, found 302.0598.

### (2-(perfluoropropyl)pyridin-3-yl)(phenyl)methanone (17e)

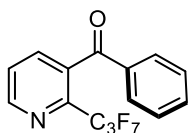

Prepared according to *General Procedure D* using corresponding Zincke ketone (70 mg, 0.2 mmol), heptafluorobutyric anhydride (57  $\mu$ L, 0.22 mmol), DMAP (4.88 mg, 0.04 mmol),  $NEt_3$  (55.8  $\mu$ L, 0.4 mmol), and  $NH_4OAc$  (155.7 mg, 2 mmol) to yield the titled compound as a colorless oil (34 mg, 46%).

**$^1H$  NMR** (500 MHz,  $CDCl_3$ )  $\delta$  8.88 (d,  $J = 4.6$  Hz, 1H), 7.74 (t,  $J = 6.2$  Hz, 3H), 7.64 – 7.57 (m, 2H), 7.47 (t,  $J = 7.8$  Hz, 2H).

**$^{19}F$  NMR** (471 MHz,  $CDCl_3$ )  $\delta$  -80.2, -108.0, -124.51.

**$^{13}C$  NMR** (126 MHz,  $CDCl_3$ )  $\delta$  193.1, 150.2, 144.6 (t,  $J = 26.5$  Hz), 136.5, 136.3, 136.1, 134.4, 130.1, 128.9, 125.7, 117.9 (qt,  $J = 288.4, 33.9$  Hz), 113.5 (tt,  $J = 258.3, 31.3$  Hz), 109.0 (tq,  $J = 264.6, 37.8$  Hz).

**HRMS** (+APCI): Calculated for:  $C_{15}H_9F_7NO$   $[M+H]^+$  352.0567, found 352.0580.

### methyl 3-benzoylpicolinate (17f)

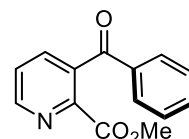

Prepared according to *General Procedure D* using corresponding Zincke ketone (70 mg, 0.2 mmol), methyl oxalyl chloride (22  $\mu$ L, 0.22 mmol), DMAP (4.88 mg, 0.04 mmol),  $NEt_3$  (55.8  $\mu$ L, 0.4 mmol), and  $NH_4OAc$  (155.7 mg, 2 mmol) to yield the titled compound as a yellow solid (26 mg, 51%).

**$^1H$  NMR** (400 MHz,  $CDCl_3$ )  $\delta$  8.85 (dd,  $J = 4.7, 1.6$  Hz, 1H), 7.81 (dd,  $J = 7.8, 1.6$  Hz, 1H), 7.77 – 7.71 (m, 2H), 7.62 – 7.55 (m, 2H), 7.45 (t,  $J = 7.7$  Hz, 2H), 3.76 (s, 3H).

**$^{13}C$  NMR** (101 MHz,  $CDCl_3$ )  $\delta$  194.7, 165.2, 150.5, 146.3, 138.0, 136.6, 136.5, 133.7, 129.4, 128.9, 126.3, 53.1.

**HRMS** (+APCI): Calculated for:  $C_{14}H_{12}NO_3$   $[M+H]^+$  242.0812, found 242.0809.

**Melting point:** 102-106 °C.

### ethyl 3-benzoylpicolinate (17g)

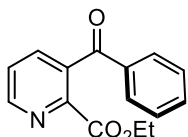

Prepared according to *General Procedure D* using corresponding Zincke ketone (70 mg, 0.2 mmol), ethyl oxalyl chloride (22  $\mu$ L, 0.22 mmol), DMAP (4.88 mg, 0.04 mmol),  $\text{NEt}_3$  (55.8  $\mu$ L, 0.4 mmol), and  $\text{NH}_4\text{OAc}$  (155.7 mg, 2 mmol) to yield the titled compound as a yellow solid (25 mg, 51%).

$^1\text{H NMR}$  (400 MHz,  $\text{CDCl}_3$ )  $\delta$  8.87 (dd,  $J = 4.7, 1.6$  Hz, 1H), 7.81 (dd,  $J = 7.8, 1.6$  Hz, 1H), 7.77 – 7.72 (m, 2H), 7.63 – 7.55 (m, 2H), 7.45 (t,  $J = 7.7$  Hz, 2H), 4.22 (q,  $J = 7.1$  Hz, 2H), 1.17 (t,  $J = 7.1$  Hz, 3H).

$^{13}\text{C NMR}$  (101 MHz,  $\text{CDCl}_3$ )  $\delta$  194.8, 164.7, 150.6, 146.7, 137.8, 136.7, 136.5, 133.7, 129.5, 128.9, 126.1, 62.6, 13.9.

**HRMS** (+APCI): Calculated for:  $\text{C}_{15}\text{H}_{14}\text{NO}_3$   $[\text{M}+\text{H}]^+$  256.0968, found 256.0980.

**Melting point:** 102-106  $^\circ\text{C}$ .

### *p*-tolyl(2-(trifluoromethyl)pyridin-3-yl)methanone (17h)

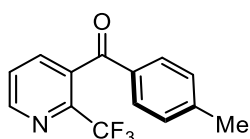

Prepared according to *General Procedure D* using corresponding Zincke ketone (73.5 mg, 0.2 mmol), TFAA (32  $\mu$ L, 0.22 mmol), DMAP (4.88 mg, 0.04 mmol),  $\text{NEt}_3$  (55.8  $\mu$ L, 0.4 mmol), and  $\text{NH}_4\text{OAc}$  (155.7 mg, 2 mmol) to yield the titled compound as a yellow oil (40.3 mg, 76%).

$^1\text{H NMR}$  (400 MHz,  $\text{CDCl}_3$ )  $\delta$  8.84 (dd,  $J = 4.7, 1.6$  Hz, 1H), 7.77 (d,  $J = 6.2$  Hz, 1H), 7.65 (d,  $J = 8.4$  Hz, 2H), 7.60 (dd,  $J = 7.8, 4.8$  Hz, 1H), 7.28 (d,  $J = 8.0$  Hz, 2H), 2.43 (s, 3H).

$^{19}\text{F NMR}$  (376 MHz,  $\text{CDCl}_3$ )  $\delta$  -63.34.

$^{13}\text{C NMR}$  (101 MHz,  $\text{CDCl}_3$ )  $\delta$  193.1, 150.3, 145.8, 144.9 (q,  $J = 34.8$  Hz), 136.7, 134.8, 133.5, 129.7, 125.9, 121.3 (q,  $J = 275.5$  Hz), 21.9.

**HRMS** (+APCI): Calculated for:  $\text{C}_{14}\text{H}_{11}\text{F}_3\text{NO}$   $[\text{M}+\text{H}]^+$  266.0793, found 266.0787.

### (2-(difluoromethyl)pyridin-3-yl)(*p*-tolyl)methanone (17i)

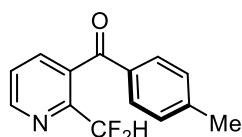

Prepared according to *General Procedure D* using corresponding Zincke ketone (73.5 mg, 0.2 mmol), difluoroacetic anhydride (29  $\mu$ L, 0.22 mmol), DMAP (4.88 mg, 0.04 mmol),  $\text{NEt}_3$  (55.8  $\mu$ L, 0.4 mmol), and  $\text{NH}_4\text{OAc}$  (155.7 mg, 2 mmol) to yield the titled compound as a colourless oil (36 mg, 73%).

$^1\text{H NMR}$  (500 MHz,  $\text{CDCl}_3$ )  $\delta$  8.84 – 8.80 (m, 1H), 7.77 (d,  $J = 7.7$  Hz, 1H), 7.67 (d,  $J = 7.9$  Hz, 2H), 7.50 (dd,  $J = 7.8, 4.8$  Hz, 1H), 7.28 (d,  $J = 8.0$  Hz, 2H), 6.81 (t,  $J = 54.6$  Hz, 1H), 2.43 (s, 3H).

$^{19}\text{F NMR}$  (376 MHz,  $\text{CDCl}_3$ )  $\delta$  -115.03.

$^{13}\text{C NMR}$  (101 MHz,  $\text{CDCl}_3$ )  $\delta$  194.2, 150.7, 150.2 (t,  $J = 23.6$  Hz), 145.5, 136.9, 134.3 (t,  $J = 2.4$  Hz), 134.0, 130.5, 129.6, 124.6, 112.4 (t,  $J = 241.7$  Hz), 21.9.

**HRMS** (+APCI): Calculated for:  $\text{C}_{14}\text{H}_{12}\text{F}_2\text{NO}$   $[\text{M}+\text{H}]^+$  248.0887, found 248.0887.

### (2-(chlorodifluoromethyl)pyridin-3-yl)(4-methoxyphenyl)methanone (17j)

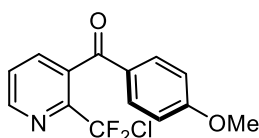

Prepared according to *General Procedure D* using corresponding Zincke ketone (76.6 mg, 0.2 mmol), chlorodifluoroacetic anhydride (40  $\mu$ L, 0.22 mmol), DMAP (4.88 mg, 0.04 mmol),  $\text{NEt}_3$  (55.8  $\mu$ L, 0.4 mmol), and  $\text{NH}_4\text{OAc}$  (155.7 mg, 2 mmol) to yield the titled compound as a yellow solid (39.2 mg, 66%).

$^1\text{H NMR}$  (500 MHz,  $\text{CDCl}_3$ )  $\delta$  8.84 (dd,  $J = 4.8, 1.6$  Hz, 1H), 7.76 – 7.69 (m, 3H), 7.55 (dd,  $J = 7.8, 4.7$  Hz, 1H), 6.97 – 6.92 (m, 2H), 3.88 (s, 3H).

$^{19}\text{F NMR}$  (376 MHz,  $\text{CDCl}_3$ )  $\delta$  -51.35.

$^{13}\text{C NMR}$  (126 MHz,  $\text{CDCl}_3$ )  $\delta$  192.1, 164.7, 150.1, 148.9 (t,  $J = 29.1$  Hz), 136.7, 133.3, 132.6, 129.1, 125.5, 124.4 (t,  $J = 291.5$  Hz), 114.2, 55.8.

**HRMS** (+APCI): Calculated for:  $\text{C}_{14}\text{H}_{10}\text{ClF}_2\text{NO}_2$   $[\text{M}+\text{H}]^+$  298.0446, found 298.0444.

### (2-(difluoromethyl)pyridin-3-yl)(4-vinylphenyl)methanone (17k)

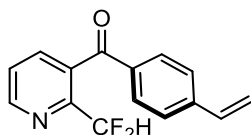

Prepared according to *General Procedure D* using corresponding Zincke ketone (75.8 mg, 0.2 mmol), difluoroacetic anhydride (29  $\mu$ L, 0.22 mmol), DMAP (4.88 mg, 0.04 mmol),  $\text{NEt}_3$  (55.8  $\mu$ L, 0.4 mmol), and  $\text{NH}_4\text{OAc}$  (155.7 mg, 2 mmol) to yield the titled compound as a colourless oil (37.3 mg, 72%).

**$^1\text{H NMR}$**  (500 MHz,  $\text{CDCl}_3$ )  $\delta$  8.82 (dd,  $J = 4.9, 1.6$  Hz, 1H), 7.78 (dd,  $J = 7.9, 1.6$  Hz, 1H), 7.76 – 7.72 (m, 2H), 7.52 – 7.48 (m, 3H), 6.94 – 6.70 (m, 2H), 5.90 (d,  $J = 17.6$  Hz, 1H), 5.44 (d,  $J = 10.8$  Hz, 1H).

**$^{19}\text{F NMR}$**  (376 MHz,  $\text{CDCl}_3$ )  $\delta$  -114.93.

**$^{13}\text{C NMR}$**  (101 MHz,  $\text{CDCl}_3$ )  $\delta$  193.9, 143.3, 136.9, 135.8, 135.5, 134.1 (t,  $J = 2.3$  Hz), 130.7, 126.6, 124.6 (d,  $J = 1.8$  Hz), 117.9, 112.4 (t,  $J = 241.8$  Hz).

**HRMS** (+APCI): Calculated for:  $\text{C}_{15}\text{H}_{12}\text{F}_2\text{NO}$   $[\text{M}+\text{H}]^+$  260.0887, found 260.0878.

### [1,1'-biphenyl]-4-yl(2-(trifluoromethyl)pyridin-3-yl)methanone (17l)

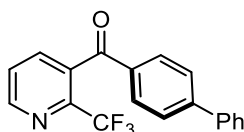

Prepared according to *General Procedure D* using corresponding Zincke ketone (85.8 mg, 0.2 mmol), TFAA (32  $\mu$ L, 0.22 mmol), DMAP (4.88 mg, 0.04 mmol),  $\text{NEt}_3$  (55.8  $\mu$ L, 0.4 mmol), and  $\text{NH}_4\text{OAc}$  (155.7 mg, 2 mmol) to yield the titled compound as a pale-yellow solid (36 mg, 55%).

**$^1\text{H NMR}$**  (500 MHz,  $\text{CDCl}_3$ )  $\delta$  8.88 (dd,  $J = 4.9, 1.6$  Hz, 1H), 7.84 – 7.81 (m, 3H), 7.72 – 7.69 (m, 2H), 7.63 (dt,  $J = 6.2, 1.5$  Hz, 3H), 7.50 – 7.47 (m, 2H), 7.43 (d,  $J = 6.0$  Hz, 1H).

**$^{19}\text{F NMR}$**  (376 MHz,  $\text{CDCl}_3$ )  $\delta$  -63.27.

**$^{13}\text{C NMR}$**  (101 MHz,  $\text{CDCl}_3$ )  $\delta$  193.0, 150.4, 147.3, 145.0 (q,  $J = 34.8$  Hz), 139.6, 136.7, 134.7, 130.8, 129.2, 128.8, 127.6, 127.5, 126.0, 121.4 (q,  $J = 275.6$  Hz).

**HRMS** (+APCI): Calculated for:  $\text{C}_{19}\text{H}_{13}\text{F}_3\text{NO}$   $[\text{M}+\text{H}]^+$  328.0949, found 328.0947.

**Melting Point:** 112 – 114  $^\circ\text{C}$ .

### (4-bromophenyl)(2-(chlorodifluoromethyl)pyridin-3-yl)methanone (17m)

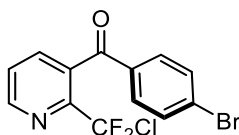

Prepared according to *General Procedure D* using corresponding Zincke ketone (85 mg, 0.2 mmol), chlorodifluoroacetic anhydride (40  $\mu$ L, 0.22 mmol), DMAP (4.88 mg, 0.04 mmol),  $\text{NEt}_3$  (55.8  $\mu$ L, 0.4 mmol), and  $\text{NH}_4\text{OAc}$  (155.7 mg, 2 mmol) to yield the titled compound as an orange solid (44.1 mg, 64%).

**$^1\text{H NMR}$**  (400 MHz,  $\text{CDCl}_3$ )  $\delta$  8.86 (dd,  $J = 4.8, 1.6$  Hz, 1H), 7.72 (dd,  $J = 7.8, 1.7$  Hz, 1H), 7.65 – 7.55 (m, 5H).

**$^{19}\text{F NMR}$**  (376 MHz,  $\text{CDCl}_3$ )  $\delta$  -51.22.

**$^{13}\text{C NMR}$**  (101 MHz,  $\text{CDCl}_3$ )  $\delta$  192.6, 150.5, 149.0 (t,  $J = 29.3$  Hz), 136.6, 134.8, 132.5, 132.3, 131.5, 130.1, 125.6, 124.3 (t,  $J = 291.2$  Hz).

**HRMS** (+APCI): Calculated for:  $\text{C}_{13}\text{H}_7\text{BrClF}_2\text{NO}$   $[\text{M}+\text{H}]^+$  345.9446, found 345.9441.

**Melting Point:** 58 – 60  $^\circ\text{C}$ .

### (2,4-difluorophenyl)(2-(trifluoromethyl)pyridin-3-yl)methanone (17n)

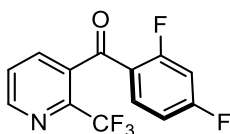

Prepared according to *General Procedure D* using corresponding Zincke ketone (77.8 mg, 0.2 mmol), TFAA (32  $\mu$ L, 0.22 mmol), DMAP (4.88 mg, 0.04 mmol),  $\text{NEt}_3$  (55.8  $\mu$ L, 0.4 mmol), and  $\text{NH}_4\text{OAc}$  (155.7 mg, 2 mmol) to yield the titled compound as a yellow oil (39 mg, 68%).

**$^1\text{H NMR}$**  (500 MHz,  $\text{CDCl}_3$ )  $\delta$  8.84 – 8.80 (m, 1H), 7.97 (td,  $J = 8.6, 6.4$  Hz, 1H), 7.78 – 7.73 (m, 1H), 7.59 (dd,  $J = 7.9, 4.7$  Hz, 1H), 7.05 – 7.02 (m, 1H), 6.83 (ddd,  $J = 10.9, 8.5, 2.5$  Hz, 1H).

**$^{19}\text{F NMR}$**  (376 MHz,  $\text{CDCl}_3$ )  $\delta$  -63.49, -98.14, -103.54.

**$^{13}\text{C NMR}$**  (101 MHz,  $\text{CDCl}_3$ )  $\delta$  188.8, 166.4 (dd,  $J = 392.7, 12.7$  Hz), 163.8 (dd,  $J = 393.7, 12.7$  Hz), 150.4, 144.0 (td,  $J = 36.0, 34.1$  Hz), 136.2, 135.7 (d,  $J = 2.4$  Hz), 133.6 (dd,  $J = 10.7, 2.4$  Hz), 126.2, 121.3 (dd,  $J = 9.7, 3.6$  Hz), 121.3 (q,  $J = 275.3$  Hz), 112.8 (dd,  $J = 21.9, 3.5$  Hz), 105.3 (t,  $J = 25.8$  Hz).

**HRMS** (+APCI): Calculated for:  $\text{C}_{13}\text{H}_7\text{F}_5\text{NO}$   $[\text{M}+\text{H}]^+$  288.0448, found 288.0439.

### [1,1'-biphenyl]-4-yl(4-phenyl-2-(trifluoromethyl)pyridin-3-yl)methanone (17o)

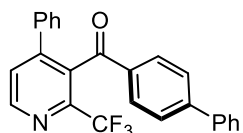

Prepared according to *General Procedure D* using corresponding Zincke ketone (101 mg, 0.2 mmol), TFAA (32  $\mu$ L, 0.22 mmol), DMAP (4.88 mg, 0.04 mmol),  $\text{NEt}_3$  (55.8  $\mu$ L, 0.4 mmol), and  $\text{NH}_4\text{OAc}$  (155.7 mg, 2 mmol) to yield the titled compound as a red solid (42 mg, 53%).

**$^1\text{H NMR}$**  (500 MHz,  $\text{CDCl}_3$ )  $\delta$  8.89 (d,  $J = 5.0$  Hz, 1H), 7.64 – 7.57 (m, 4H), 7.57 – 7.50 (m, 5H), 7.46 – 7.41 (m, 3H), 7.41 – 7.36 (m, 2H), 7.27 (d,  $J = 1.0$  Hz, 1H).

**$^{19}\text{F NMR}$**  (376 MHz,  $\text{CDCl}_3$ )  $\delta$  -62.46.

**$^{13}\text{C NMR}$**  (101 MHz,  $\text{CDCl}_3$ )  $\delta$  193.6, 150.1, 149.8, 146.5, 145.2 (q,  $J = 34.2$  Hz), 139.6, 136.4, 135.4, 133.4, 130.0, 129.3, 129.1, 128.9, 128.7, 128.6, 127.4, 127.4, 127.2, 121.6 (q,  $J = 276.3$  Hz).

**HRMS** (+APCI): Calculated for:  $\text{C}_{25}\text{H}_{17}\text{F}_3\text{NO}$   $[\text{M}+\text{H}]^+$  404.1262, found 404.1265.

**Melting Point:** 98 – 100  $^\circ\text{C}$ .

### naphthalen-2-yl(4-phenyl-2-(trifluoromethyl)pyridin-3-yl)methanone (17p)

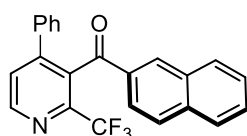

Prepared according to *General Procedure D* using corresponding Zincke ketone (95.8 mg, 0.2 mmol), TFAA (32  $\mu$ L, 0.22 mmol), DMAP (4.88 mg, 0.04 mmol),  $\text{NEt}_3$  (55.8  $\mu$ L, 0.4 mmol), and  $\text{NH}_4\text{OAc}$  (155.7 mg, 2 mmol) to yield the titled compound as a brown solid (38 mg, 51%).

**$^1\text{H NMR}$**  (500 MHz,  $\text{CDCl}_3$ )  $\delta$  8.91 (d,  $J = 4.9$  Hz, 1H), 7.93 (s, 1H), 7.78 (dd,  $J = 8.1, 6.5$  Hz, 2H), 7.76 – 7.73 (m, 2H), 7.61 (d,  $J = 5.0$  Hz, 1H), 7.59 – 7.54 (m, 1H), 7.49 (ddd,  $J = 8.1, 6.9, 1.2$  Hz, 1H), 7.26 – 7.22 (m, 2H), 7.18 (dq,  $J = 6.3, 3.5$  Hz, 3H).

**$^{19}\text{F NMR}$**  (376 MHz,  $\text{CDCl}_3$ )  $\delta$  -62.44.

**$^{13}\text{C NMR}$**  (101 MHz,  $\text{CDCl}_3$ )  $\delta$  194.0, 150.2, 149.9, 145.3 (q,  $J = 34.2$  Hz), 136.4, 135.9, 134.1, 133.4, 132.3, 132.2, 129.8, 129.2, 129.2, 128.8, 128.7, 127.9, 127.5, 127.0, 124.0, 121.6 (q,  $J = 276.3$  Hz).

**HRMS** (+APCI): Calculated for:  $\text{C}_{23}\text{H}_{15}\text{F}_3\text{NO}$   $[\text{M}+\text{H}]^+$  378.1106, found 378.1089.

**Melting Point:** 94 – 96  $^\circ\text{C}$ .

### thiophen-3-yl(2-(trifluoromethyl)pyridin-3-yl)methanone (17q)

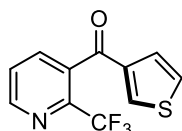

Prepared according to *General Procedure D* using corresponding Zincke ketone (71.8 mg, 0.2 mmol), TFAA (32  $\mu$ L, 0.22 mmol), DMAP (4.88 mg, 0.04 mmol),  $\text{NEt}_3$  (55.8  $\mu$ L, 0.4 mmol), and  $\text{NH}_4\text{OAc}$  (155.7 mg, 2 mmol) to yield the titled compound as a yellow oil (31.9 mg, 62%).

**$^1\text{H NMR}$**  (400 MHz,  $\text{CDCl}_3$ )  $\delta$  8.85 (d,  $J = 4.7$  Hz, 1H), 7.84 (d,  $J = 7.8$  Hz, 1H), 7.73 (dt,  $J = 2.7, 1.1$  Hz, 1H), 7.61 (dd,  $J = 7.8, 4.8$  Hz, 1H), 7.56 (d,  $J = 5.1$  Hz, 1H), 7.42 – 7.39 (m, 1H).

**$^{19}\text{F NMR}$**  (376 MHz,  $\text{CDCl}_3$ )  $\delta$  -63.26.

**$^{13}\text{C NMR}$**  (101 MHz,  $\text{CDCl}_3$ )  $\delta$  186.8, 150.5, 144.7 (q,  $J = 35.0$  Hz), 141.6, 136.5, 136.3, 134.9, 127.5, 127.4, 126.0, 121.3 (q,  $J = 275.7$  Hz).

**HRMS** (+APCI): Calculated for:  $\text{C}_{11}\text{H}_7\text{F}_3\text{NOS}$   $[\text{M}+\text{H}]^+$  258.0200, found 258.0197.

### furan-3-yl(2-(trifluoromethyl)pyridin-3-yl)methanone (17r)

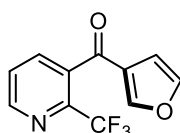

Prepared according to *General Procedure D* using corresponding Zincke ketone (68.6 mg, 0.2 mmol), TFAA (32  $\mu$ L, 0.22 mmol), DMAP (4.88 mg, 0.04 mmol),  $\text{NEt}_3$  (55.8  $\mu$ L, 0.4 mmol), and  $\text{NH}_4\text{OAc}$  (155.7 mg, 2 mmol) to yield the titled compound as a yellow oil (25.1 mg, 52%).

**$^1\text{H NMR}$**  (400 MHz,  $\text{CDCl}_3$ )  $\delta$  8.85 (d,  $J = 4.7$  Hz, 1H), 7.84 (d,  $J = 7.8$  Hz, 1H), 7.73 (dt,  $J = 2.7, 1.1$  Hz, 1H), 7.61 (dd,  $J = 7.8, 4.8$  Hz, 1H), 7.56 (d,  $J = 5.1$  Hz, 1H), 7.42 – 7.39 (m, 1H).

**$^{19}\text{F NMR}$**  (376 MHz,  $\text{CDCl}_3$ )  $\delta$  -63.26.

**$^{13}\text{C NMR}$**  (101 MHz,  $\text{CDCl}_3$ )  $\delta$  186.7, 150.6, 150.2, 145.2, 144.8 (d,  $J = 35.1$  Hz), 136.4, 134.8, 127.9, 126.0, 121.3 (q,  $J = 275.6$  Hz), 109.0.

**HRMS** (+APCI): Calculated for:  $\text{C}_{11}\text{H}_7\text{F}_3\text{NO}_2$   $[\text{M}+\text{H}]^+$  242.0429, found 242.0419.

### (2-(trifluoromethyl)pyridin-3-yl)(6-(trifluoromethyl)pyridin-3-yl)methanone (17s)

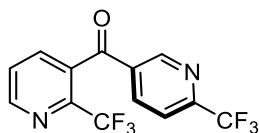

Prepared according to *General Procedure D* using corresponding Zincke ketone (84.43 mg, 0.2 mmol), TFAA (32  $\mu$ L, 0.22 mmol), DMAP (4.88 mg, 0.04 mmol), NEt<sub>3</sub> (55.8  $\mu$ L, 0.4 mmol), and NH<sub>4</sub>OAc (155.7 mg, 2 mmol) to yield the titled compound as a yellow oil (37.1 mg, 58%).

**<sup>1</sup>H NMR** (500 MHz, CDCl<sub>3</sub>)  $\delta$  8.99 (d,  $J$  = 2.1 Hz, 1H), 8.94 (dd,  $J$  = 4.8, 1.5 Hz, 1H), 8.29 (dd,  $J$  = 8.2, 2.2 Hz, 1H), 7.85 (dd,  $J$  = 8.2, 0.9 Hz, 1H), 7.83 (dd,  $J$  = 7.8, 1.6 Hz, 1H), 7.69 (dd,  $J$  = 7.8, 4.8 Hz, 1H).

**<sup>19</sup>F NMR** (376 MHz, CDCl<sub>3</sub>)  $\delta$  -63.05, -68.35.

**<sup>13</sup>C NMR** (101 MHz, CDCl<sub>3</sub>)  $\delta$  191.1, 152.3 (q,  $J$  = 35.4 Hz), 151.4, 151.2, 145.1 (q,  $J$  = 35.2 Hz), 138.6, 136.6, 133.5, 132.8, 126.3, 121.1 (q,  $J$  = 275.6 Hz), 121.0 (q,  $J$  = 274.9 Hz), 120.8 (d,  $J$  = 2.7 Hz).

**HRMS** (+APCI): Calculated for: C<sub>13</sub>H<sub>7</sub>F<sub>6</sub>N<sub>2</sub>O [M+H]<sup>+</sup> 321.0463, found 321.0455.

### dibenzo[b,d]furan-3-yl(2-(trifluoromethyl)pyridin-3-yl)methanone (17t)

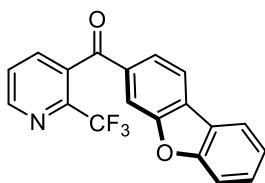

Prepared according to *General Procedure D* using corresponding Zincke ketone (88.6 mg, 0.2 mmol), TFAA (32  $\mu$ L, 0.22 mmol), DMAP (4.88 mg, 0.04 mmol), NEt<sub>3</sub> (55.8  $\mu$ L, 0.4 mmol), and NH<sub>4</sub>OAc (155.7 mg, 2 mmol) to yield the titled compound as a yellow solid (30 mg, 44%).

**<sup>1</sup>H NMR** (400 MHz, CDCl<sub>3</sub>)  $\delta$  8.91 (dd,  $J$  = 4.8, 1.6 Hz, 1H), 8.02 (ddd,  $J$  = 7.8, 3.0, 2.0 Hz, 2H), 7.98 (d,  $J$  = 1.5 Hz, 1H), 7.86 (dd,  $J$  = 7.8, 1.6 Hz, 1H), 7.75 (dd,  $J$  = 8.1, 1.5 Hz, 1H), 7.68 – 7.53 (m, 3H), 7.41 (ddd,  $J$  = 8.1, 7.1, 1.2 Hz, 1H).

**<sup>19</sup>F NMR** (376 MHz, CDCl<sub>3</sub>)  $\delta$  -63.26.

**<sup>13</sup>C NMR** (101 MHz, CDCl<sub>3</sub>)  $\delta$  192.8, 158.0, 155.8, 150.5, 145.0 (q,  $J$  = 34.8 Hz), 136.7, 134.8, 134.7, 130.1, 129.4, 126.0, 125.1, 123.6, 123.1, 121.9, 121.4 (q,  $J$  = 275.6 Hz), 120.9, 113.6, 112.3.

**HRMS** (+APCI): Calculated for: C<sub>19</sub>H<sub>11</sub>F<sub>3</sub>NO<sub>2</sub> [M+H]<sup>+</sup> 342.0742, found 342.0726.

**Melting Point:** 118 – 120 °C.

### (9-phenyl-9H-carbazol-3-yl)(2-(trifluoromethyl)pyridin-3-yl)methanone (17u)

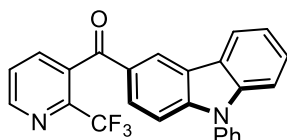

Prepared according to *General Procedure D* using corresponding Zincke ketone (103.7 mg, 0.2 mmol), TFAA (32  $\mu$ L, 0.22 mmol), DMAP (4.88 mg, 0.04 mmol), NEt<sub>3</sub> (55.8  $\mu$ L, 0.4 mmol), and NH<sub>4</sub>OAc (155.7 mg, 2 mmol) to yield the titled compound as a yellow solid (34.1 mg, 41%).

**<sup>1</sup>H NMR** (400 MHz, CDCl<sub>3</sub>)  $\delta$  8.90 (dd,  $J$  = 4.8, 1.6 Hz, 1H), 8.54 (d,  $J$  = 1.8 Hz, 1H), 8.12 (d,  $J$  = 7.8 Hz, 1H), 7.87 (ddd,  $J$  = 10.7, 8.2, 1.7 Hz, 2H), 7.67 – 7.61 (m, 3H), 7.55 (d,  $J$  = 7.8 Hz, 3H), 7.48 – 7.45 (m, 1H), 7.39 (d,  $J$  = 8.3 Hz, 2H), 7.37 – 7.32 (m, 1H).

**<sup>19</sup>F NMR** (376 MHz, CDCl<sub>3</sub>)  $\delta$  -63.30.

**<sup>13</sup>C NMR** (101 MHz, CDCl<sub>3</sub>)  $\delta$  192.9, 150.2, 144.9 (d,  $J$  = 34.7 Hz), 144.4, 142.1, 136.9, 136.7, 135.4, 130.3, 128.6, 128.4, 127.3, 126.0, 124.0, 123.5, 123.3, 121.5 (d,  $J$  = 275.3 Hz), 121.4, 120.8, 110.6, 110.0.

**HRMS** (+APCI): Calculated for: C<sub>25</sub>H<sub>16</sub>F<sub>3</sub>N<sub>2</sub>O [M+H]<sup>+</sup> 417.1215, found 417.1207.

### 2-methylbenzofuro[2,3-b]pyridin-8-yl(2-(trifluoromethyl)pyridin-3-yl)methanone (17v)

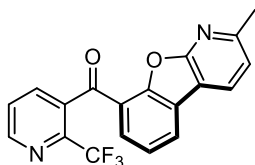

Prepared according to *General Procedure D* using corresponding Zincke ketone (91.6 mg, 0.2 mmol), TFAA (32  $\mu$ L, 0.22 mmol), DMAP (4.88 mg, 0.04 mmol), NEt<sub>3</sub> (55.8  $\mu$ L, 0.4 mmol), and NH<sub>4</sub>OAc (155.7 mg, 2 mmol) to yield the titled compound as a yellow solid (48.4 mg, 68%).

**<sup>1</sup>H NMR** (500 MHz, CDCl<sub>3</sub>)  $\delta$  8.90 (d,  $J$  = 4.7 Hz, 1H), 8.15 (dd,  $J$  = 7.8, 2.3 Hz, 2H), 7.99 – 7.94 (m, 1H), 7.88 (dd,  $J$  = 7.9, 1.5 Hz, 1H), 7.64 (dd,  $J$  = 7.8, 4.7 Hz, 1H), 7.49 (t,  $J$  = 7.7 Hz, 1H), 7.20 (d,  $J$  = 7.7 Hz, 1H), 2.62 (s, 3H).

**<sup>19</sup>F NMR** (376 MHz, CDCl<sub>3</sub>)  $\delta$  -63.29.

**<sup>13</sup>C NMR** (101 MHz, CDCl<sub>3</sub>)  $\delta$  190.3, 163.1, 157.8, 152.9, 150.6, 144.6 (q,  $J$  = 34.9 Hz), 136.5, 136.0, 130.2, 129.4, 127.0, 126.2, 124.7, 123.5, 121.5, 121.4 (q,  $J$  = 275.6 Hz), 119.8, 112.5, 24.6.

**HRMS** (+APCI): Calculated for: C<sub>19</sub>H<sub>12</sub>F<sub>3</sub>N<sub>2</sub>O<sub>2</sub> [M+H]<sup>+</sup> 357.0851, found 357.0858.

**Melting Point:** 190 – 192 °C.

### **(3-((5-(4-fluorophenyl)thiophen-2-yl)methyl)-4-methylphenyl)(2-(trifluoromethyl)pyridin-3-yl)methanone (17w)**

Prepared according to *General Procedure D* using corresponding Zincke ketone (111.4 mg, 0.2 mmol), TFAA (32 μL, 0.22 mmol), DMAP (4.88 mg, 0.04 mmol), NEt<sub>3</sub> (55.8 μL, 0.4 mmol), and NH<sub>4</sub>OAc (155.7 mg, 2 mmol) to yield the titled compound as a pale-yellow oil (41 mg, 45%).

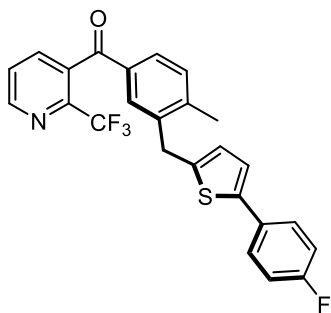

**<sup>1</sup>H NMR** (500 MHz, CDCl<sub>3</sub>) δ 8.82 (d, *J* = 4.8 Hz, 1H), 7.77 (d, *J* = 7.8 Hz, 1H), 7.64 (d, *J* = 1.9 Hz, 1H), 7.56 (dd, *J* = 7.8, 4.8 Hz, 1H), 7.53 (dd, *J* = 7.9, 1.9 Hz, 1H), 7.46 (dd, *J* = 8.6, 5.3 Hz, 2H), 7.29 (d, *J* = 7.9 Hz, 1H), 7.08 – 6.98 (m, 3H), 6.64 (d, *J* = 3.5 Hz, 1H), 4.15 (s, 2H), 2.41 (s, 3H).

**<sup>19</sup>F NMR** (376 MHz, CDCl<sub>3</sub>) δ -63.25, -114.85.

**<sup>13</sup>C NMR** (101 MHz, CDCl<sub>3</sub>) δ 193.0, 162.3 (d, *J* = 247.0 Hz), 150.3, 144.8 (q, *J* = 35.0 Hz), 144.3, 142.0, 141.9, 139.2, 136.7, 134.7, 134.3, 131.1 (d, *J* = 7.4 Hz), 130.8 (d, *J* = 3.4 Hz), 129.1, 127.3 (d, *J* = 8.0 Hz), 126.5, 125.9, 122.5, 121.3 (q, *J* = 275.6 Hz), 116.0, 115.8, 34.1, 20.1.

**HRMS** (+APCI): Calculated for: C<sub>25</sub>H<sub>18</sub>F<sub>4</sub>NOS [M+H]<sup>+</sup> 456.1045, found 456.1044.

### **4-phenyl-2-(trifluoromethyl)nicotinaldehyde (19a)**

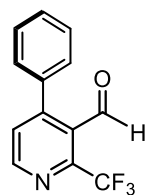

Prepared according to *General Procedure D* using corresponding Zincke imine (96.8 mg, 0.2 mmol), TFAA (35 μL, 0.24 mmol), DMAP (4.88 mg, 0.04 mmol), NEt<sub>3</sub> (55.8 μL, 0.4 mmol), and NH<sub>4</sub>OAc (155.7 mg, 2 mmol) to yield the titled compound as a yellow solid (16.1 mg, 32%).

**<sup>1</sup>H NMR** (400 MHz, CDCl<sub>3</sub>) δ 10.20 (d, *J* = 1.9 Hz, 1H), 8.83 (d, *J* = 5.0 Hz, 1H), 7.58 (d, *J* = 5.0 Hz, 1H), 7.53 – 7.48 (m, 3H), 7.33 (dd, *J* = 6.7, 2.9 Hz, 2H).

**<sup>19</sup>F NMR** (376 MHz, CDCl<sub>3</sub>) δ -62.16

**<sup>13</sup>C NMR** (101 MHz, CDCl<sub>3</sub>) δ 190.8, 152.7, 150.6, 146.1 (q, *J* = 35.5 Hz), 135.3, 130.6, 129.9, 129.4, 129.2, 128.2, 121.4 (q, *J* = 276.1 Hz).

**HRMS** (+APCI): Calculated for: C<sub>13</sub>H<sub>9</sub>F<sub>3</sub>NO [M+H]<sup>+</sup> 252.0636, found 252.0620.

**Melting Point:** 64 – 66 °C.

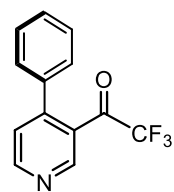

The non-rearranged product, **2,2,2-trifluoro-1-(4-phenylpyridin-3-yl)ethan-1-one 20a** was isolated by flash column chromatography (30% EA:Hexane) as yellow oil (33.1 mg, 66%).

**<sup>1</sup>H NMR** (500 MHz, CDCl<sub>3</sub>) δ 8.88 (s, 1H), 8.82 (d, *J* = 5.1 Hz, 1H), 7.49 – 7.43 (m, 4H), 7.31 – 7.27 (m, 2H).

**<sup>19</sup>F NMR** (376 MHz, CDCl<sub>3</sub>) δ -73.71.

**<sup>13</sup>C NMR** (101 MHz, CDCl<sub>3</sub>) δ 185.0 (q, *J* = 37.7 Hz), 153.0, 151.2, 149.0, 136.9, 129.7, 129.2, 128.4, 125.5, 115.6 (q, *J* = 291.8 Hz).

**HRMS** (+APCI): Calculated for: C<sub>13</sub>H<sub>9</sub>F<sub>3</sub>NO [M+H]<sup>+</sup> 252.0636, found 252.0619.

### **2-(trifluoromethyl)-4-(3-vinylphenyl)nicotinaldehyde (19b)**

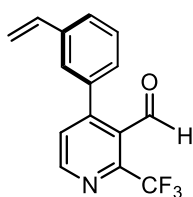

Prepared according to *General Procedure D* using corresponding Zincke imine (102 mg, 0.2 mmol), TFAA (35 μL, 0.24 mmol), DMAP (4.88 mg, 0.04 mmol), NEt<sub>3</sub> (55.8 μL, 0.4 mmol), and NH<sub>4</sub>OAc (155.7 mg, 2 mmol) to yield the titled compound as a yellow solid (18.8 mg, 34%).

**<sup>1</sup>H NMR** (400 MHz, CDCl<sub>3</sub>) δ 10.24 (s, 1H), 8.89 – 8.83 (m, 1H), 7.67 – 7.45 (m, 3H), 7.35 – 7.20 (m, 1H), 6.78 (d, *J* = 19.6 Hz, 1H), 5.84 (d, *J* = 17.3 Hz, 1H), 5.39 (d, *J* = 10.8 Hz, 1H).

**<sup>19</sup>F NMR** (376 MHz, CDCl<sub>3</sub>) δ -62.19

**<sup>13</sup>C NMR** (101 MHz, CDCl<sub>3</sub>) δ 190.6, 152.5, 150.6, 146.1 (d, *J* = 35.7 Hz), 145.6, 138.6, 135.8, 130.6, 129.4, 128.6, 128.1, 127.5, 127.1, 121.4 (d, *J* = 275.8 Hz), 116.0.

**HRMS** (+APCI): Calculated for: C<sub>15</sub>H<sub>11</sub>F<sub>3</sub>NO [M+H]<sup>+</sup> 278.0714, found 278.0779.

**Melting Point:** 66 – 68 °C.

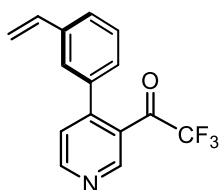

The non-rearranged product, **2,2,2-trifluoro-1-(4-(3-vinylphenyl)pyridin-3-yl)ethan-1-one 20b** was isolated by flash column chromatography (30% EA:Hexane) as yellow oil (35.5 mg, 64%).

**<sup>1</sup>H NMR** (500 MHz, CDCl<sub>3</sub>) δ 8.89 (s, 1H), 8.84 (d, *J* = 5.2 Hz, 1H), 7.55 – 7.48 (m, 2H), 7.43 (t, *J* = 7.7 Hz, 1H), 7.37 (s, 1H), 7.32 (t, *J* = 1.8 Hz, 1H), 7.17 (dt, *J* = 7.6, 1.5 Hz, 1H), 6.74 (dd, *J* = 17.6, 10.9 Hz, 1H), 5.79 (d, *J* = 17.6 Hz, 1H), 5.34 (d, *J* = 10.9 Hz, 1H).

**<sup>19</sup>F NMR** (376 MHz, CDCl<sub>3</sub>) δ -73.66.

**<sup>13</sup>C NMR** (101 MHz, CDCl<sub>3</sub>) δ 184.9 (q, *J* = 37.4 Hz), 152.8, 151.3, 148.9 (q, *J* = 2.8 Hz), 138.7, 137.1, 136.0, 129.5, 127.7, 127.5, 126.2, 125.5, 115.6, 115.6 (q, *J* = 292.0 Hz).

**HRMS** (+APCI): Calculated for: C<sub>15</sub>H<sub>11</sub>F<sub>3</sub>NO [M+H]<sup>+</sup> 278.0714, found 278.0776.

#### 4-(4-methoxyphenyl)-2-(trifluoromethyl)nicotinaldehyde (19c)

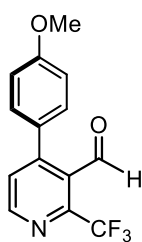

Prepared according to *General Procedure D* using corresponding Zincke imine (102.8 mg, 0.2 mmol), TFAA (35 μL, 0.24 mmol), DMAP (4.88 mg, 0.04 mmol), NEt<sub>3</sub> (55.8 μL, 0.4 mmol), and NH<sub>4</sub>OAc (155.7 mg, 2 mmol) to yield the titled compound as a yellow oil (15.7 mg, 28%).

**<sup>1</sup>H NMR** (400 MHz, CDCl<sub>3</sub>) δ 10.11 (d, *J* = 1.6 Hz, 1H), 8.72 (d, *J* = 4.9 Hz, 1H), 7.50 (d, *J* = 4.9 Hz, 1H), 7.24 – 7.17 (m, 2H), 6.95 (d, *J* = 8.3 Hz, 2H), 3.81 (d, *J* = 1.0 Hz, 3H).

**<sup>19</sup>F NMR** (376 MHz, CDCl<sub>3</sub>) δ -62.20.

**<sup>13</sup>C NMR** (101 MHz, CDCl<sub>3</sub>) δ 191.0, 161.1, 152.3, 150.4, 145.9 (q, *J* = 35.4 Hz), 131.0, 130.4, 128.0, 127.3, 121.4 (d, *J* = 275.9 Hz), 114.7, 55.6.

**HRMS** (+APCI): Calculated for: C<sub>14</sub>H<sub>11</sub>F<sub>3</sub>NO<sub>2</sub> [M+H]<sup>+</sup> 282.0742, found 282.0725.

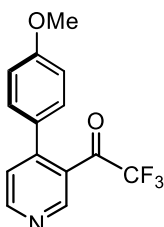

The non-rearranged product, **2,2,2-trifluoro-1-(4-(4-methoxyphenyl)pyridin-3-yl)ethan-1-one 20c** was isolated by flash column chromatography (30% EA:Hexane) as yellow oil (38.2 mg, 68%).

**<sup>1</sup>H NMR** (400 MHz, CDCl<sub>3</sub>) δ 8.91 – 8.64 (m, 2H), 7.41 (d, *J* = 4.8 Hz, 1H), 7.25 – 7.21 (m, 2H), 7.00 – 6.95 (m, 2H), 3.84 (s, 3H).

**<sup>19</sup>F NMR** (376 MHz, CDCl<sub>3</sub>) δ -73.70.

**<sup>13</sup>C NMR** (101 MHz, CDCl<sub>3</sub>) δ 185.8 (q, *J* = 37.2 Hz), 160.9, 153.1, 150.4, 149.3, 129.9, 129.2, 125.0, 115.6 (q, *J* = 291.7 Hz), 114.8, 55.5.

**HRMS** (+APCI): Calculated for: C<sub>14</sub>H<sub>11</sub>F<sub>3</sub>NO<sub>2</sub> [M+H]<sup>+</sup> 282.0742, found 282.0730.

#### 4-(naphthalen-2-yl)-2-(trifluoromethyl)nicotinaldehyde (19d)

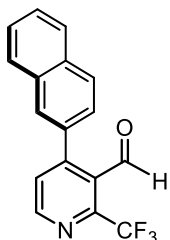

Prepared according to *General Procedure D* using corresponding Zincke imine (106.8 mg, 0.2 mmol), TFAA (35 μL, 0.24 mmol), DMAP (4.88 mg, 0.04 mmol), NEt<sub>3</sub> (55.8 μL, 0.4 mmol), and NH<sub>4</sub>OAc (155.7 mg, 2 mmol) to yield the titled compound as a yellow solid (19.9 mg, 33%).

**<sup>1</sup>H NMR** (400 MHz, CDCl<sub>3</sub>) δ 10.25 (d, *J* = 1.9 Hz, 1H), 8.86 (d, *J* = 5.0 Hz, 1H), 7.97 (d, *J* = 8.5 Hz, 1H), 7.94 – 7.87 (m, 2H), 7.80 (d, *J* = 1.9 Hz, 1H), 7.67 (d, *J* = 5.0 Hz, 1H), 7.61 – 7.58 (m, 2H), 7.43 (dd, *J* = 8.4, 1.9 Hz, 1H).

**<sup>19</sup>F NMR** (376 MHz, CDCl<sub>3</sub>) δ -62.11.

**<sup>13</sup>C NMR** (101 MHz, CDCl<sub>3</sub>) δ 190.6, 152.6, 150.6, 146.3 (q, *J* = 35.2 Hz), 133.4, 133.0, 132.8, 130.7, 129.4, 129.2, 128.5, 128.4, 128.0, 127.7, 127.5, 126.2, 121.5 (q, *J* = 276.0 Hz).

**HRMS** (+APCI): Calculated for: C<sub>17</sub>H<sub>11</sub>F<sub>3</sub>NO [M+H]<sup>+</sup> 302.0793, found 302.0798.

**Melting Point:** 92 – 94 °C.

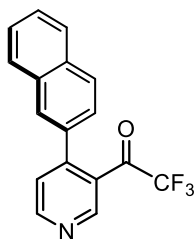

The non-rearranged product, **2,2,2-trifluoro-1-(4-(naphthalen-2-yl)pyridin-3-yl)ethan-1-one 20d** was isolated by flash column chromatography (30% EA:Hexane) as yellow oil (39.7 mg, 66%).

**<sup>1</sup>H NMR** (400 MHz, CDCl<sub>3</sub>) δ 8.95 (s, 1H), 8.86 (d, *J* = 5.2 Hz, 1H), 7.94 (d, *J* = 8.5 Hz, 1H), 7.91 – 7.83 (m, 2H), 7.76 (s, 1H), 7.56 (dt, *J* = 10.8, 6.0 Hz, 3H), 7.44 – 7.36 (m, 1H).

**<sup>19</sup>F NMR** (376 MHz, CDCl<sub>3</sub>) δ -73.45.

**<sup>13</sup>C NMR** (101 MHz, CDCl<sub>3</sub>) δ 185.0 (q, *J* = 37.1 Hz), 153.2, 151.1, 149.4 (q, *J* = 2.6 Hz), 134.4,

133.4, 133.2, 129.2, 128.6, 128.5, 128.2, 128.0, 127.5, 127.2, 125.7, 125.5, 115.7 (q, *J* = 291.8 Hz).

**HRMS** (+APCI): Calculated for: C<sub>17</sub>H<sub>11</sub>F<sub>3</sub>NO [M+H]<sup>+</sup> 302.0793, found 302.0788.

#### 4-(thiophen-3-yl)-2-(trifluoromethyl)nicotinaldehyde (19e)

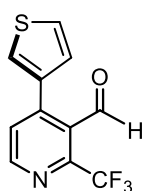

Prepared according to *General Procedure D* using corresponding Zincke imine (98 mg, 0.2 mmol), TFAA (35 μL, 0.24 mmol), DMAP (4.88 mg, 0.04 mmol), NEt<sub>3</sub> (55.8 μL, 0.4 mmol), and NH<sub>4</sub>OAc (155.7 mg, 2 mmol) to yield the titled compound as a yellow solid (18.5 mg, 36%).

**<sup>1</sup>H NMR** (400 MHz, CDCl<sub>3</sub>) δ 10.27 (d, *J* = 1.9 Hz, 1H), 8.80 (d, *J* = 5.1 Hz, 1H), 7.62 (d, *J* = 5.1 Hz, 1H), 7.51 (dd, *J* = 5.0, 2.9 Hz, 1H), 7.43 (dd, *J* = 2.9, 1.4 Hz, 1H), 7.18 (dd, *J* = 5.0, 1.4 Hz, 1H).

**<sup>19</sup>F NMR** (376 MHz, CDCl<sub>3</sub>) δ -62.23.

**<sup>13</sup>C NMR** (101 MHz, CDCl<sub>3</sub>) δ 191.1, 150.6, 146.6, 146.0 (d, *J* = 35.5 Hz), 135.7, 130.5, 128.3, 127.8, 127.6, 127.5, 121.4 (d, *J* = 276.0 Hz).

**HRMS** (+APCI): Calculated for: C<sub>11</sub>H<sub>7</sub>F<sub>3</sub>NOS [M+H]<sup>+</sup> 257.0200, found 258.0181.

**Melting Point:** 62 – 64 °C.

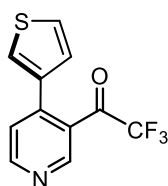

The non-rearranged product, **2,2,2-trifluoro-1-(4-(thiophen-3-yl)pyridin-3-yl)ethan-1-one 20e** was isolated by flash column chromatography (30% EA:Hexane) as yellow oil (33.7 mg, 62%).

**<sup>1</sup>H NMR** (400 MHz, CDCl<sub>3</sub>) 8.82 (s, 2H), 7.52 – 7.44 (m, 2H), 7.38 (dd, *J* = 3.0, 1.4 Hz, 1H), 7.11 (d, *J* = 1.4 Hz, 1H).

**<sup>19</sup>F NMR** (376 MHz, CDCl<sub>3</sub>) δ -74.00.

**<sup>13</sup>C NMR** (101 MHz, CDCl<sub>3</sub>) δ 185.4 (d, *J* = 37.3 Hz), 153.0, 148.8, 145.2, 137.3, 127.8, 127.4, 126.2, 124.9, 119.5 (q, *J* = 319.4 Hz).

**HRMS** (+APCI): Calculated for: C<sub>11</sub>H<sub>7</sub>F<sub>3</sub>NOS [M+H]<sup>+</sup> 257.0200, found 258.0185.

#### 4-methoxy-2-(trifluoromethyl)nicotinaldehyde (19f)

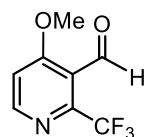

Prepared according to *General Procedure D* using corresponding Zincke imine (87.6 mg, 0.2 mmol), TFAA (35 μL, 0.24 mmol), DMAP (4.88 mg, 0.04 mmol), NEt<sub>3</sub> (55.8 μL, 0.4 mmol), and NH<sub>4</sub>OAc (155.7 mg, 2 mmol) to yield the titled compound as a white solid (14.8 mg, 36%).

**<sup>1</sup>H NMR** (400 MHz, CDCl<sub>3</sub>) δ 10.47 (d, *J* = 2.0 Hz, 1H), 8.66 (d, *J* = 5.5 Hz, 2H), 7.13 (d, *J* = 5.4 Hz, 1H), 4.01 (s, 3H).

**<sup>19</sup>F NMR** (376 MHz, CDCl<sub>3</sub>) δ -62.51

**<sup>13</sup>C NMR** (101 MHz, CDCl<sub>3</sub>) δ 188.3, 166.7, 153.2, 147.7 (q, *J* = 35.2 Hz), 121.3, 121.2 (q, *J* = 275.8 Hz), 110.2, 56.8.

**HRMS** (+APCI): Calculated for: C<sub>11</sub>H<sub>7</sub>F<sub>3</sub>NOS [M+H]<sup>+</sup> 206.0429, found 206.0427.

**Melting Point:** 74 – 76 °C.

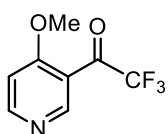

Due to the volatile nature of the non-rearranged compound, **2,2,2-trifluoro-1-(4-methoxy-3-pyridinyl)ethan-1-one 20f** could not be isolated.

## 9. Product Derivatization

### 3-(1-phenylvinyl)-2-(trifluoromethyl)pyridine (21)

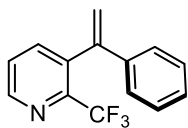

To the microwave vial was added phenyl(2-(trifluoromethyl)pyridin-3-yl)methanone (51 mg, 0.2 mmol), evacuated and backfilled 3 times with nitrogen. Dry THF (2 mL, 0.1 M) was added as solvent, followed by Tebbe reagent (68.3 mg, 0.24 mmol), and the reaction mixture was stirred at 60 °C overnight. The reaction mixture was cooled and quenched with NaHCO<sub>3</sub> aqueous solution.

The mixture was filtered through filter paper, and the residue was washed with DCM. The solution obtained was concentrated under reduced pressure. The residue was redissolved in water (8 mL) and DCM (30 mL) and then extracted with DCM (10 mL × 3). The combined organic layers were washed with brine, dried over Na<sub>2</sub>SO<sub>4</sub>, and concentrated under reduced pressure. The crude product was then purified by flash column chromatography (Hex: EtOAc = 10:1 ~ 10:5) to afford the 3-alkenyl pyridine as a yellow liquid (46 mg, 90% yield).

**<sup>1</sup>H NMR** (400 MHz, CDCl<sub>3</sub>) δ 8.72 (dd, *J* = 4.7, 1.2 Hz, 1H), 7.69 – 7.64 (m, 1H), 7.50 (dd, *J* = 7.8, 4.7 Hz, 1H), 7.35 – 7.28 (m, 3H), 7.24 – 7.20 (m, 2H), 5.94 (s, 1H), 5.27 (s, 1H).

**<sup>19</sup>F NMR** (376 MHz, CDCl<sub>3</sub>) δ -62.40.

**<sup>13</sup>C NMR** (101 MHz, CDCl<sub>3</sub>) δ 148.4, 145.9 (q, *J* = 32.6 Hz), 144.3, 140.4, 139.4, 136.8, 128.6, 128.3, 126.7, 126.0, 121.9 (d, *J* = 275.9 Hz), 117.1.

**HRMS** (+APCI): Calculated for: C<sub>14</sub>H<sub>11</sub>F<sub>3</sub>N [M+H]<sup>+</sup> 250.0838, found 250.0848.

### phenyl(2-(trifluoromethyl)pyridin-3-yl)methanol (22)

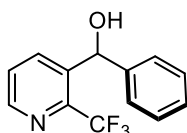

To the microwave vial was added phenyl(2-(trifluoromethyl)pyridin-3-yl)methanone (51 mg, 0.2 mmol), and NaBH<sub>4</sub> (15.2 mg, 0.4 mmol), evacuated and backfilled 3 times with nitrogen.

Butanol (0.1M) was added as a solvent. The reaction mixture was stirred at 120 °C overnight.

The reaction was cooled down to room temperature. To this mixture was slowly added water (10 mL) and then extracted with EtOAc (10 mL × 3). The combined organic layers were washed

with brine, dried over Na<sub>2</sub>SO<sub>4</sub>, and concentrated under reduced pressure. The crude product was then purified by flash column chromatography (Hex: EtOAc = 10:1 ~ 10:5) to afford the 3-benzyl pyridine as a colorless liquid (41 mg, 90% yield).

**<sup>1</sup>H NMR** (400 MHz, CDCl<sub>3</sub>) δ 8.62 – 8.58 (m, 1H), 8.09 (d, *J* = 8.0 Hz, 1H), 7.50 (dd, *J* = 8.0, 4.6 Hz, 1H), 7.39 – 7.27 (m, 5H), 6.34 (s, 1H), 2.66 (s, 1H).

**<sup>19</sup>F NMR** (376 MHz, CDCl<sub>3</sub>) δ -61.80.

**<sup>13</sup>C NMR** (101 MHz, CDCl<sub>3</sub>) δ 148.2, 144.5 (q, *J* = 33.3 Hz), 142.0, 138.6, 138.2, 128.8, 128.2, 127.0, 126.6, 122.3 (q, *J* = 275.7 Hz), 69.9 (d, *J* = 3.0 Hz).

**HRMS** (+APCI): Calculated for: C<sub>13</sub>H<sub>11</sub>F<sub>3</sub>NO [M+H]<sup>+</sup> 254.0787, found 254.0779.

### 3-benzoylpicolinic acid (23)

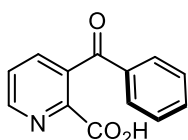

Ethyl 3-benzoylpicolinate (46 mg, 0.2 mmol) was taken in a microwave vial with THF (1 mL) solvent. Aq. NaOH solution (1 mL, 1.0 M) was added slowly at 0 °C. The reaction mixture was stirred at room temperature for 2 hours. The starting material consumption was monitored with TLC. Then, the reaction was neutralized by 1M HCl solution and extracted with EtOAc (10 mL × 3). The combined organic layers were washed with brine, dried over Na<sub>2</sub>SO<sub>4</sub>, and concentrated

under reduced pressure. The crude product was then purified by flash column chromatography (Hex: EtOAc = 10:1 ~ 10:5) to afford the 3-benzoyl picolinic acid as an orange solid (40 mg, 85% yield).

**<sup>1</sup>H NMR** (400 MHz, CDCl<sub>3</sub>) δ 8.84 (d, *J* = 2.5 Hz, 1H), 8.60 – 8.10 (bs, 1H), 7.86 (d, *J* = 7.6 Hz, 1H), 7.78 – 7.66 (m, 3H), 7.58 (t, *J* = 7.2 Hz, 1H), 7.44 (t, *J* = 7.5 Hz, 2H).

**<sup>13</sup>C NMR** (101 MHz, CDCl<sub>3</sub>) δ 194.2, 163.7, 149.0, 144.1, 138.4, 137.4, 136.4, 133.9, 129.5, 128.8, 127.5.

**HRMS** (+APCI): Calculated for: C<sub>13</sub>H<sub>10</sub>NO<sub>3</sub> [M+H]<sup>+</sup> 228.0655, found 228.0657.

The data are consistent with the literature.<sup>[8]</sup>

## 10. Sequentially functionalized Pyridine Products

### (5-fluoro-2-(trifluoromethyl)pyridin-3-yl)(phenyl)methanone (24a)

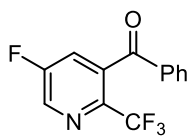

Prepared according to *General Procedure E* using corresponding Zincke ketone (70 mg, 0.2 mmol) and TFAA (32  $\mu$ L, 0.22 mmol), DMAP (4.88 mg, 0.04 mmol),  $\text{NEt}_3$  (55.8  $\mu$ L, 0.4 mmol), NFSI (126.1 mg, 0.4 mmol), and  $\text{NH}_4\text{OAc}$  (155.7 mg, 2 mmol) to yield the titled compound as a colorless oil (23 mg, 40%).

**$^1\text{H NMR}$**  (400 MHz,  $\text{CDCl}_3$ )  $\delta$  8.69 (d,  $J$  = 2.6 Hz, 1H), 7.81 – 7.72 (m, 2H), 7.67 (t,  $J$  = 7.4 Hz, 1H), 7.56 – 7.47 (m, 3H).

**$^{19}\text{F NMR}$**  (376 MHz,  $\text{CDCl}_3$ )  $\delta$  -62.56, -120.1.

**$^{13}\text{C NMR}$**  (101 MHz,  $\text{CDCl}_3$ )  $\delta$  191.5, 159.8 (d,  $J$  = 262.6 Hz), 141.0 (dq,  $J$  = 35.8, 4.2 Hz), 139.2 (d,  $J$  = 20.2 Hz), 136.4 (d,  $J$  = 3.0 Hz), 135.4, 134.9, 130.2, 129.1, 123.4 (d,  $J$  = 20.2 Hz), 121.0 (q,  $J$  = 275.7 Hz).

**HRMS** (+APCI): Calculated for:  $\text{C}_{13}\text{H}_8\text{F}_4\text{NO}$  [ $\text{M}+\text{H}$ ] $^+$  270.0537, found 270.0537.

### (5-chloro-2-(trifluoromethyl)pyridin-3-yl)(phenyl)methanone (24b)

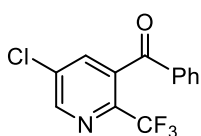

Prepared according to *General Procedure E* using corresponding Zincke ketone (70 mg, 0.2 mmol) and TFAA (32  $\mu$ L, 0.22 mmol), DMAP (4.88 mg, 0.04 mmol),  $\text{NEt}_3$  (55.8  $\mu$ L, 0.4 mmol), *N*-chlorosuccinamide (29.4 mg, 0.22 mmol) and  $\text{NH}_4\text{OAc}$  (155.7 mg, 2 mmol) to yield the titled compound as a white solid (26 mg, 45%).

**$^1\text{H NMR}$**  (400 MHz,  $\text{CDCl}_3$ )  $\delta$  8.79 (d,  $J$  = 2.1 Hz, 1H), 7.80 – 7.72 (m, 3H), 7.67 (t,  $J$  = 7.4 Hz, 1H), 7.52 (t,  $J$  = 7.8 Hz, 2H).

**$^{19}\text{F NMR}$**  (376 MHz,  $\text{CDCl}_3$ )  $\delta$  -63.05.

**$^{13}\text{C NMR}$**  (101 MHz,  $\text{CDCl}_3$ )  $\delta$  191.7, 149.4, 143.0 (q,  $J$  = 35.4 Hz), 136.1, 135.5, 135.5, 135.0, 134.9, 130.2, 129.1, 121.1 (q,  $J$  = 275.7).

**HRMS** (+APCI): Calculated for:  $\text{C}_{13}\text{H}_8\text{ClF}_3\text{NO}$  [ $\text{M}+\text{H}$ ] $^+$  286.0241, found 286.0233.

**Melting point:** 116 – 118  $^\circ\text{C}$ .

### (5-bromo-2-(trifluoromethyl)pyridin-3-yl)(phenyl)methanone (24c)

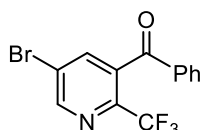

Prepared according to *General Procedure E* using corresponding Zincke ketone (70 mg, 0.2 mmol) and TFAA (32  $\mu$ L, 0.22 mmol), DMAP (4.88 mg, 0.04 mmol),  $\text{NEt}_3$  (55.8  $\mu$ L, 0.4 mmol), *N*-bromosuccinamide (39.2 mg, 0.22 mmol) and  $\text{NH}_4\text{OAc}$  (155.7 mg, 2 mmol) to yield the titled compound as a yellow solid (25 mg, 36%).

**$^1\text{H NMR}$**  (400 MHz,  $\text{CDCl}_3$ )  $\delta$  8.89 (d,  $J$  = 1.9 Hz, 1H), 7.91 (d,  $J$  = 1.9 Hz, 1H), 7.80 – 7.72 (m, 2H), 7.71 – 7.62 (m, 1H), 7.51 (t,  $J$  = 7.8 Hz, 2H).

**$^{19}\text{F NMR}$**  (376 MHz,  $\text{CDCl}_3$ )  $\delta$  -63.18.

**$^{13}\text{C NMR}$**  (101 MHz,  $\text{CDCl}_3$ )  $\delta$  191.6, 151.7, 143.4 (q,  $J$  = 35.5 Hz), 138.9, 135.7, 135.5, 134.9, 130.2, 129.1, 123.7, 121.2 (q,  $J$  = 276.7 Hz).

**HRMS** (+APCI): Calculated for:  $\text{C}_{13}\text{H}_8\text{BrF}_3\text{NO}$  [ $\text{M}+\text{H}$ ] $^+$  329.9736, found 329.9745.

**Melting point:** 124 – 128  $^\circ\text{C}$ .

### (5-iodo-2-(trifluoromethyl)pyridin-3-yl)(phenyl)methanone (24d)

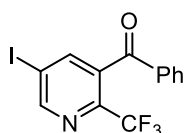

Prepared according to *General Procedure E* using corresponding Zincke ketone (70 mg, 0.2 mmol) and TFAA (32  $\mu$ L, 0.22 mmol), DMAP (4.88 mg, 0.04 mmol),  $\text{NEt}_3$  (55.8  $\mu$ L, 0.4 mmol), *N*-iodosuccinamide (49.5 mg, 0.22 mmol) with additive TFA (16.9  $\mu$ L, 0.22 mmol) and  $\text{NH}_4\text{OAc}$  (155.7 mg, 2 mmol) to yield the titled compound as a white solid (32 mg, 40%).

**$^1\text{H NMR}$**  (400 MHz,  $\text{CDCl}_3$ )  $\delta$  9.05 (d,  $J$  = 1.6 Hz, 1H), 8.09 (d,  $J$  = 1.5 Hz, 1H), 7.79 – 7.73 (m, 2H), 7.69 – 7.62 (m, 1H), 7.55 – 7.45 (m, 2H).

**$^{19}\text{F NMR}$**  (377 MHz,  $\text{CDCl}_3$ )  $\delta$  -63.36.

**$^{13}\text{C NMR}$**  (101 MHz,  $\text{CDCl}_3$ )  $\delta$  191.7, 156.6, 144.4, 143.8 (q,  $J$  = 35.4 Hz), 135.8, 135.5, 134.8, 130.2, 129.1, 121.3 (q,  $J$  = 275.6 Hz), 96.4.

**HRMS** (+APCI): Calculated for: C<sub>13</sub>H<sub>8</sub>F<sub>3</sub>NO [M+H]<sup>+</sup> 377.9597, found 377.9583.

**Melting point:** 102 - 108 °C.

#### (4-(4-methoxyphenyl)-2-(trifluoromethyl)pyridin-3-yl)(phenyl)methanone (25a)

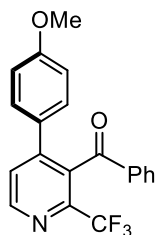

Prepared according to *General Procedure F* using corresponding Zincke ketone (70 mg, 0.2 mmol), 4-iodoanisole (56.2 mg, 0.24 mmol), Pd(OAc)<sub>2</sub> (4.5 mg, 0.02 mmol), K<sub>2</sub>CO<sub>3</sub> (55.3 mg, 0.4 mmol), TFAA (32 μL, 0.22 mmol), DMAP (4.88 mg, 0.04 mmol), NEt<sub>3</sub> (55.8 μL, 0.4 mmol) and NH<sub>4</sub>OAc (155.7 mg, 2 mmol) to yield the titled compound as a yellow solid (54 mg, 35%).

**<sup>1</sup>H NMR** (400 MHz, CDCl<sub>3</sub>) δ 8.82 (d, J = 5.0 Hz, 1H), 7.54 (t, J = 5.5 Hz, 3H), 7.45 (t, J = 7.4 Hz, 1H), 7.29 (t, J = 7.7 Hz, 2H), 7.17 (d, J = 8.7 Hz, 2H), 6.75 (d, J = 8.7 Hz, 2H), 3.72 (s, 3H).

**<sup>19</sup>F NMR** (377 MHz, CDCl<sub>3</sub>) δ -62.48.

**<sup>13</sup>C NMR** (101 MHz, CDCl<sub>3</sub>) δ 194.5, 160.3, 149.8, 149.7, 145.1 (q, J = 34.3 Hz), 136.6, 134.0, 133.2, 130.3, 129.4, 128.7, 128.6, 127.4, 121.6 (q, J = 276.7 Hz), 114.2, 55.3.

**HRMS** (+APCI): Calculated for: C<sub>20</sub>H<sub>15</sub>F<sub>3</sub>NO<sub>2</sub> [M+H]<sup>+</sup> 358.1050, found 358.1054.

**Melting point:** 142 - 150 °C.

#### (4-([1,1'-biphenyl]-4-yl)-2-(trifluoromethyl)pyridin-3-yl)(phenyl)methanone (25b)

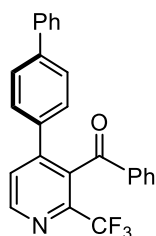

Prepared according to *General Procedure F* using corresponding Zincke ketone (70 mg, 0.2 mmol), 4-iodo-1,1'-biphenyl (67.2 mg, 0.24 mmol), Pd(OAc)<sub>2</sub> (4.5 mg, 0.02 mmol), K<sub>2</sub>CO<sub>3</sub> (55.3 mg, 0.4 mmol), TFAA (32 μL, 0.22 mmol), DMAP (4.88 mg, 0.04 mmol), NEt<sub>3</sub> (55.8 μL, 0.4 mmol) and NH<sub>4</sub>OAc (155.7 mg, 2 mmol) to yield the titled compound as a yellow solid (62 mg, 36%).

**<sup>1</sup>H NMR** (500 MHz, CDCl<sub>3</sub>) δ 8.77 (d, J = 4.4 Hz, 1H), 7.48 (d, J = 8.5 Hz, 3H), 7.44 - 7.27 (m, 7H), 7.27 - 7.13 (m, 5H).

**<sup>13</sup>C NMR** (126 MHz, CDCl<sub>3</sub>) δ 194.2, 149.8, 149.7, 145.2 (q, J = 34.0 Hz), 141.9, 139.8, 136.7, 135.2,

134.0, 133.3, 129.4, 129.3, 129.0, 128.6, 128.0, 127.3 (2C overlap), 127.1, 121.5 (q, J = 277.2 Hz).

**<sup>19</sup>F NMR** (471 MHz, CDCl<sub>3</sub>) δ -62.41.

**HRMS** (+APCI): Calculated for: C<sub>25</sub>H<sub>17</sub>F<sub>3</sub>NO [M+H]<sup>+</sup> 404.1257, found 404.1253.

**Melting point:** 180 - 186 °C.

#### (4-(dibenzo[b,d]furan-2-yl)-2-(trifluoromethyl)pyridin-3-yl)(phenyl)methanone (25c)

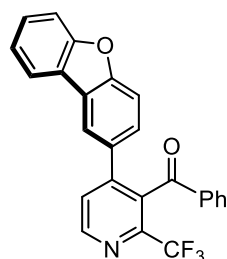

Prepared according to *General Procedure F* using corresponding Zincke ketone (70 mg, 0.2 mmol), 2-bromo dibenzo[b,d]furan (59.3 mg, 0.24 mmol), Pd(OAc)<sub>2</sub> (4.5 mg, 0.02 mmol), K<sub>2</sub>CO<sub>3</sub> (55.3 mg, 0.4 mmol), TFAA (32 μL, 0.22 mmol), DMAP (4.88 mg, 0.04 mmol), NEt<sub>3</sub> (55.8 μL, 0.4 mmol) and NH<sub>4</sub>OAc (155.7 mg, 2 mmol) to yield the titled compound as a yellow solid (57 mg, 32%).

**<sup>1</sup>H NMR** (400 MHz, CDCl<sub>3</sub>) δ 8.76 (d, J = 5.0 Hz, 1H), 7.74 - 7.67 (m, 2H), 7.52 (d, J = 5.0 Hz, 1H), 7.45 (d, J = 7.3 Hz, 2H), 7.41 - 7.17 (m, 6H), 7.16 - 7.09 (m, 2H).

**<sup>19</sup>F NMR** (376 MHz, CDCl<sub>3</sub>) δ -62.36.

**<sup>13</sup>C NMR** (101 MHz, CDCl<sub>3</sub>) δ 194.3, 156.6, 156.2, 149.9, 149.7, 145.1 (q, J = 238 34.3 Hz), 136.5, 134.0, 133.5, 131.0, 129.2, 128.6, 128.0, 127.9, 127.7, 124.7, 123.4, 123.2, 121.5 (q, J = 276.7 Hz), 121.4, 120.9, 111.9, 111.9.

**HRMS** (+APCI): Calculated for: C<sub>25</sub>H<sub>15</sub>F<sub>3</sub>NO<sub>2</sub> [M+H]<sup>+</sup> 418.1050, found 418.1040.

**Melting point:** 146 - 148 °C.

## (4-(dibenzo[b,d]thiophen-2-yl)-2-(trifluoromethyl)pyridin-3-yl)(phenyl)methanone (25d)

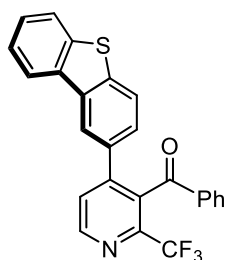

Prepared according to *General Procedure F* using corresponding Zincke ketone (70 mg, 0.2 mmol), 2-bromodibenzothiophene (63.2 mg, 0.24 mmol), Pd(OAc)<sub>2</sub> (4.5 mg, 0.02 mmol), K<sub>2</sub>CO<sub>3</sub> (55.3 mg, 0.4 mmol), TFAA (32 μL, 0.22 mmol), DMAP (4.88 mg, 0.04 mmol), NEt<sub>3</sub> (55.8 μL, 0.4 mmol) and NH<sub>4</sub>OAc (155.7 mg, 2 mmol) to yield the titled compound as a yellow solid (56 mg, 31%).

**<sup>1</sup>H NMR** (400 MHz, CDCl<sub>3</sub>) δ 8.92 (d, *J* = 4.7 Hz, 1H), 8.03 (s, 1H), 8.01 – 7.97 (m, 1H), 7.82 (d, *J* = 7.6 Hz, 1H), 7.73 (d, *J* = 8.3 Hz, 1H), 7.67 (d, *J* = 4.8 Hz, 1H), 7.61 (d, *J* = 7.7 Hz, 2H), 7.50 – 7.39 (m, 3H), 7.34 (d, *J* = 8.3 Hz, 1H), 7.29 (d, *J* = 7.3 Hz, 2H).

**<sup>19</sup>F NMR** (377 MHz, CDCl<sub>3</sub>) δ -62.39.

**<sup>13</sup>C NMR** (101 MHz, CDCl<sub>3</sub>) δ 194.9, 149.8, 149.8, 145.2 (q, *J* = 34.3 Hz), 140.5, 139.9, 136.7, 135.7, 134.9, 134.1, 133.5, 132.6, 129.3, 128.7, 127.7, 127.4, 126.9, 124.8, 123.2, 123.0, 122.1, 121.8, 120.1 (q, *J* = 276.7 Hz).

**HRMS** (+APCI): Calculated for: C<sub>25</sub>H<sub>15</sub>F<sub>3</sub>NOS [M+H]<sup>+</sup> 434.0821, found 434.0822.

**Melting point:** 188 – 192 °C.

## 11. X-Ray Crystallography

All data collections, crystal structure determinations, and refinements were done by the X-ray crystallography service (Dr. Avantika Hasija) at The University of Manchester.

Crystallographic data for 15b, 17j, 17l, 17m, 17t, 17v, 23, 24b, 24c, 25a, and 25d have been deposited in the Cambridge Crystallographic Data Centre, with deposition numbers *CCDC 2487297 (14a)*, *CCDC 2515794 (17j)*, *CCDC 2487303 (17l)*, *CCDC 2515794 (17m)*, *CCDC 2478546 (17t)*, *CCDC 2515793 (17v)*, *CCDC 2487299 (23)*, *CCDC 2475756 (24b)*, *CCDC 2475750 (24c)*, *CCDC 2475751 (25a)*, and *CCDC 2475672 (25d)*, are available free of charge via <https://www.ccdc.cam.ac.uk/structures/>.

### *X-Ray structure of (2E,4E)-5-(dibenzylamino)-1-phenylpenta-2,4-dien-1-one (15b)*

**CCDC Deposition Number: 2487297**

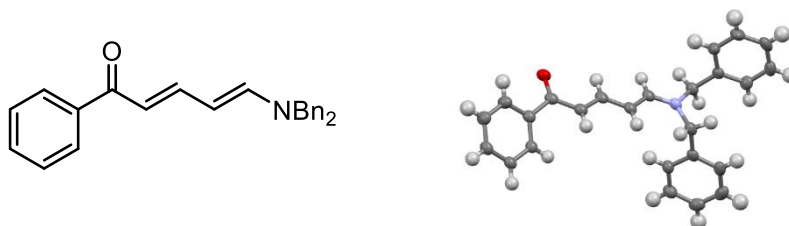

|                 |                |                    |                   |
|-----------------|----------------|--------------------|-------------------|
| Bond precision: | C-C = 0.0022 Å | Wavelength=1.54184 | Temperature:100 K |
| Cell:           | a=10.2927(1)   | b=20.50005(19)     | c=18.53109(19)    |
|                 | alpha=90       | beta=90.1212(9)    | gamma=90          |

|                        | Calculated                          | Reported                            |
|------------------------|-------------------------------------|-------------------------------------|
| Volume                 | 3910.07(7)                          | 3910.07(7)                          |
| Space group            | P 21/c                              | P 1 21/c 1                          |
| Hall group             | -P 2ybc                             | -P 2ybc                             |
| Moiety formula         | C <sub>25</sub> H <sub>23</sub> N O | C <sub>25</sub> H <sub>23</sub> N O |
| Sum formula            | C <sub>25</sub> H <sub>23</sub> N O | C <sub>25</sub> H <sub>23</sub> N O |
| Mr                     | 353.44                              | 353.44                              |
| Dx, g cm <sup>-3</sup> | 1.201                               | 1.201                               |
| Z                      | 8                                   | 8                                   |

|           |             |             |
|-----------|-------------|-------------|
| Mu (mm-1) | 0.561       | 0.561       |
| F000      | 1504.0      | 1504.0      |
| F000'     | 1508.05     |             |
| h,k,lmax  | 12,24,22    | 12,24,22    |
| Nref      | 6901        | 6625        |
| Tmin,Tmax | 0.966,0.976 | 0.931,1.000 |
| Tmin'     | 0.960       |             |

Correction method= #

Reported T Limits: Tmin=0.931 Tmax=1.000

AbsCorr = GAUSSIAN

Data completeness= 0.960

Theta(max)= 66.599

R(reflections)= 0.0405( 5486)

wR2(reflections)= 0.1047( 6625)

S = 1.019

Npar= 487

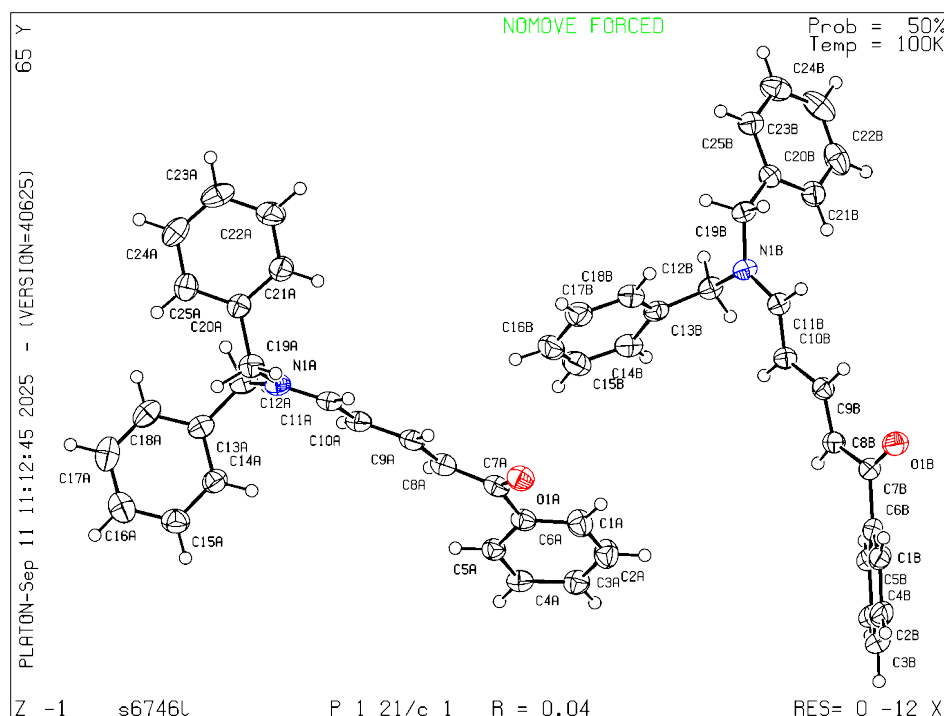

**X-Ray structure of 2-(chlorodifluoromethyl)pyridin-3-yl(4-methoxyphenyl)methanone (17j)**

CCDC Deposition Number: 2515794

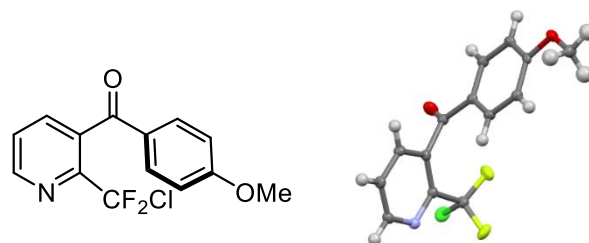

|                 |                |                    |                   |
|-----------------|----------------|--------------------|-------------------|
| Bond precision: | C-C = 0.0018 Å | Wavelength=1.54184 | Temperature:100 K |
| Cell:           | a=10.69639(17) | b=11.34198(17)     | c=21.1345(3)      |
|                 | alpha=90       | beta=90            | gamma=90          |

|                | Calculated         | Reported           |
|----------------|--------------------|--------------------|
| Volume         | 2564.00(7)         | 2564.00(7)         |
| Space group    | P b c a            | P b c a            |
| Hall group     | -P 2ac 2ab         | -P 2ac 2ab         |
| Moiety formula | C14 H10 Cl F2 N O2 | C14 H10 Cl F2 N O2 |
| Sum formula    | C14 H10 Cl F2 N O2 | C14 H10 Cl F2 N O2 |
| Mr             | 297.68             | 297.68             |
| Dx,g cm-3      | 1.542              | 1.542              |
| Z              | 8                  | 8                  |
| Mu (mm-1)      | 2.896              | 2.896              |
| F000           | 1216.0             | 1216.0             |
| F000'          | 1223.01            |                    |
| h,k,lmax       | 13,14,26           | 13,14,26           |
| Nref           | 2743               | 2640               |
| Tmin,Tmax      | 0.630,0.796        | 0.608,1.000        |
| Tmin'          | 0.468              |                    |

Correction method= #

Reported T Limits: Tmin=0.608 Tmax=1.000

AbsCorr = GAUSSIAN

Data completeness= 0.962

Theta(max)= 77.911

R(reflections)= 0.0296( 2375)

wR2(reflections)= 0.0799( 2640)

S = 1.085

Npar= 182

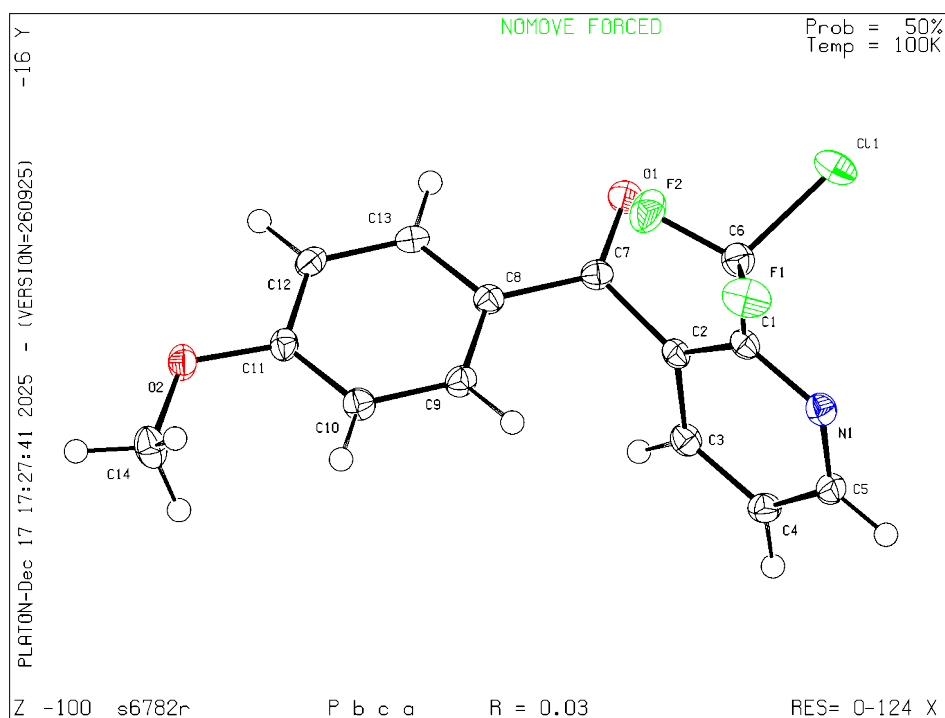

**X-Ray structure of [1,1'-biphenyl]-4-yl(2-(trifluoromethyl)pyridin-3-yl)methanone (17l)**

CCDC Deposition Number: 2487303

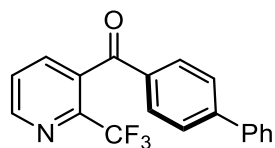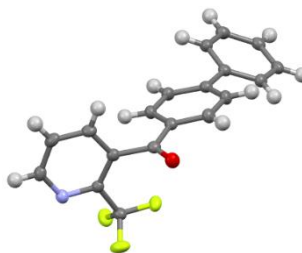

|                 |                |                    |                   |
|-----------------|----------------|--------------------|-------------------|
| Bond precision: | C-C = 0.0031 A | Wavelength=1.54184 | Temperature:100 K |
| Cell:           | a=31.5336(3)   | b=35.2182(4)       | c=8.0829(1)       |
|                 | alpha=90       | beta=90            | gamma=90          |

|                | Calculated                                         | Reported                                           |
|----------------|----------------------------------------------------|----------------------------------------------------|
| Volume         | 8976.52(17)                                        | 8976.52(17)                                        |
| Space group    | A b a 2                                            | A e a 2                                            |
| Hall group     | A 2 -2ac                                           | A 2 -2ac                                           |
| Moiety formula | C <sub>19</sub> H <sub>12</sub> F <sub>3</sub> N O | C <sub>19</sub> H <sub>12</sub> F <sub>3</sub> N O |
| Sum formula    | C <sub>19</sub> H <sub>12</sub> F <sub>3</sub> N O | C <sub>19</sub> H <sub>12</sub> F <sub>3</sub> N O |
| Mr             | 327.30                                             | 327.30                                             |
| Dx,g cm-3      | 1.453                                              | 1.453                                              |
| Z              | 24                                                 | 24                                                 |
| Mu (mm-1)      | 0.986                                              | 0.986                                              |
| F000           | 4032.0                                             | 4032.0                                             |
| F000'          | 4046.85                                            |                                                    |
| h,k,lmax       | 39,44,10                                           | 39,44,10                                           |
| Nref           | 9575[ 5142]                                        | 9357                                               |
| Tmin,Tmax      | 0.899,0.943                                        | 0.822,1.000                                        |
| Tmin'          | 0.774                                              |                                                    |

Correction method= #

Reported T Limits: Tmin=0.822 Tmax=1.000

AbsCorr = MULTI-SCAN

Data completeness= 1.82/0.98

Theta(max)= 77.821

R(reflections)= 0.0324( 8633)

wR2(reflections)= 0.0790( 9357)

S = 1.037

Npar= 649

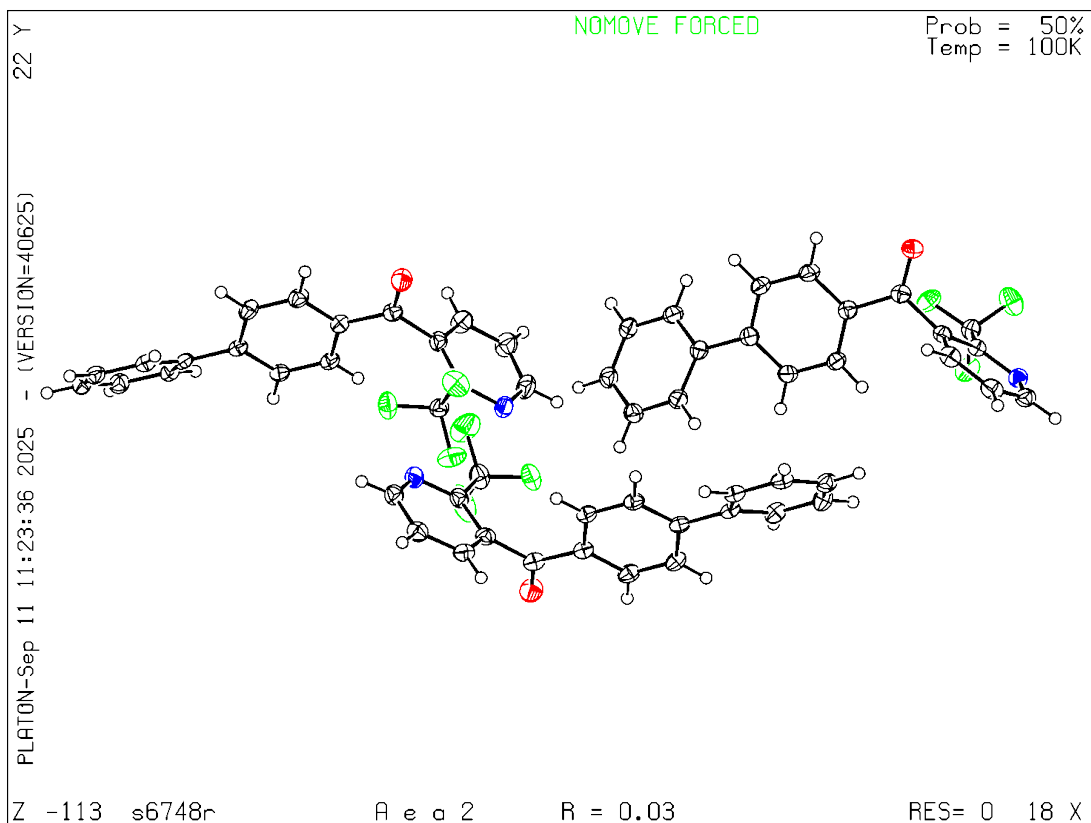

**X-Ray structure of (4-bromophenyl)(2-(chlorodifluoromethyl)pyridin-3-yl)methanone (17m)**

CCDC Deposition Number: 2515792

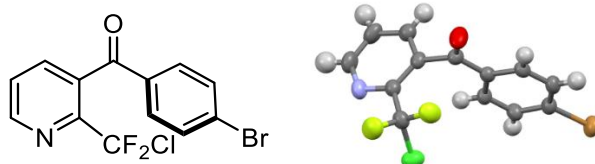

|                 |                 |                    |                   |
|-----------------|-----------------|--------------------|-------------------|
| Bond precision: | C-C = 0.0062 Å  | Wavelength=1.54184 | Temperature:100 K |
| Cell:           | a=8.0757(3)     | b=10.1580(4)       | c=16.3029(5)      |
|                 | alpha=85.467(3) | beta=78.465(3)     | gamma=88.991(3)   |

|                        | Calculated                                              | Reported                                                |
|------------------------|---------------------------------------------------------|---------------------------------------------------------|
| Volume                 | 1306.26(8)                                              | 1306.27(8)                                              |
| Space group            | P -1                                                    | P -1                                                    |
| Hall group             | -P 1                                                    | -P 1                                                    |
| Moiety formula         | C <sub>13</sub> H <sub>7</sub> Br Cl F <sub>2</sub> N O | C <sub>13</sub> H <sub>7</sub> Br Cl F <sub>2</sub> N O |
| Sum formula            | C <sub>13</sub> H <sub>7</sub> Br Cl F <sub>2</sub> N O | C <sub>13</sub> H <sub>7</sub> Br Cl F <sub>2</sub> N O |
| Mr                     | 346.55                                                  | 346.56                                                  |
| Dx, g cm <sup>-3</sup> | 1.762                                                   | 1.762                                                   |
| Z                      | 4                                                       | 4                                                       |
| Mu (mm <sup>-1</sup> ) | 6.335                                                   | 6.334                                                   |
| F000                   | 680.0                                                   | 680.0                                                   |
| F000'                  | 680.56                                                  |                                                         |
| h,k,lmax               | 10,12,20                                                | 9,12,20                                                 |
| Nref                   | 5564                                                    | 5108                                                    |

|           |             |             |
|-----------|-------------|-------------|
| Tmin,Tmax | 0.636,0.881 | 0.665,0.929 |
| Tmin'     | 0.471       |             |

Correction method= #

Reported T Limits: Tmin=0.665 Tmax=0.929

AbsCorr = GAUSSIAN

Data completeness= 0.918

Theta(max)= 77.571

R(reflections)= 0.0441( 4059)

wR2(reflections)= 0.1187( 5108)

S = 1.029

Npar= 343

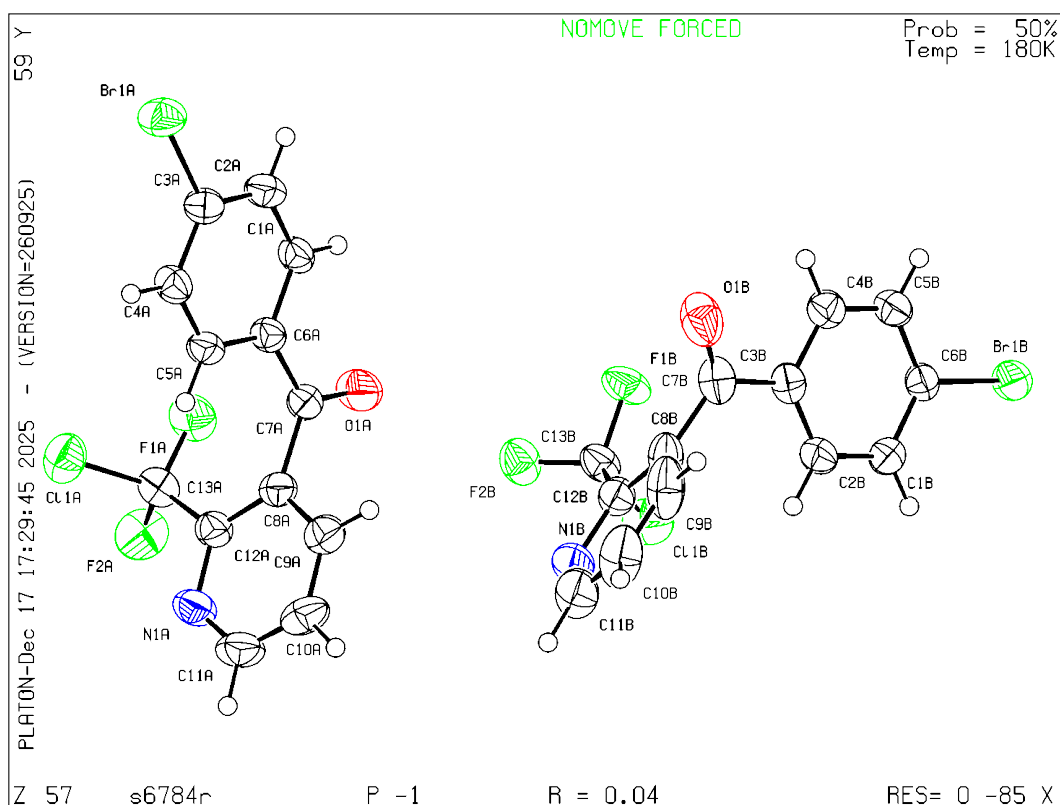

**X-Ray structure of dibenzo[b,d]furan-3-yl(2-(trifluoromethyl)pyridin-3-yl)methanone (17t)**

CCDC Deposition Number: 2478546

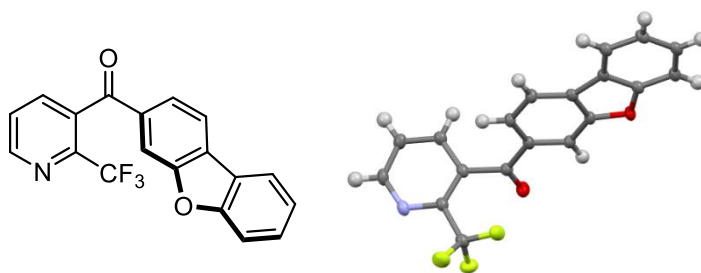

|                 |                  |                    |                   |
|-----------------|------------------|--------------------|-------------------|
| Bond precision: | C-C = 0.0023 Å   | Wavelength=1.54184 | Temperature:100 K |
| Cell:           | a=6.3172(3)      | b=9.4347(4)        | c=13.0054(5)      |
|                 | alpha=104.381(3) | beta=101.852(4)    | gamma=95.556(4)   |

|                | Calculated                                                      | Reported                                                        |
|----------------|-----------------------------------------------------------------|-----------------------------------------------------------------|
| Volume         | 725.85(6)                                                       | 725.85(5)                                                       |
| Space group    | P -1                                                            | P -1                                                            |
| Hall group     | -P 1                                                            | -P 1                                                            |
| Moiety formula | C <sub>19</sub> H <sub>10</sub> F <sub>3</sub> N O <sub>2</sub> | C <sub>19</sub> H <sub>10</sub> F <sub>3</sub> N O <sub>2</sub> |
| Sum formula    | C <sub>19</sub> H <sub>10</sub> F <sub>3</sub> N O <sub>2</sub> | C <sub>19</sub> H <sub>10</sub> F <sub>3</sub> N O <sub>2</sub> |
| Mr             | 341.28                                                          | 341.28                                                          |
| Dx,g cm-3      | 1.561                                                           | 1.561                                                           |
| Z              | 2                                                               | 2                                                               |
| Mu (mm-1)      | 1.099                                                           | 1.099                                                           |
| F000           | 348.0                                                           | 348.0                                                           |
| F000'          | 349.34                                                          |                                                                 |
| h,k,lmax       | 8,11,16                                                         | 8,11,16                                                         |
| Nref           | 3083                                                            | 2906                                                            |
| Tmin,Tmax      | 0.917,0.960                                                     | 0.878,1.000                                                     |
| Tmin'          | 0.859                                                           |                                                                 |

Correction method= #

Reported T Limits: Tmin=0.878 Tmax=1.000

AbsCorr = GAUSSIAN

Data completeness= 0.943

Theta(max)= 77.783

R(reflections)= 0.0405( 2422)

wR2(reflections)= 0.1091( 2906)

S = 1.048

Npar= 226

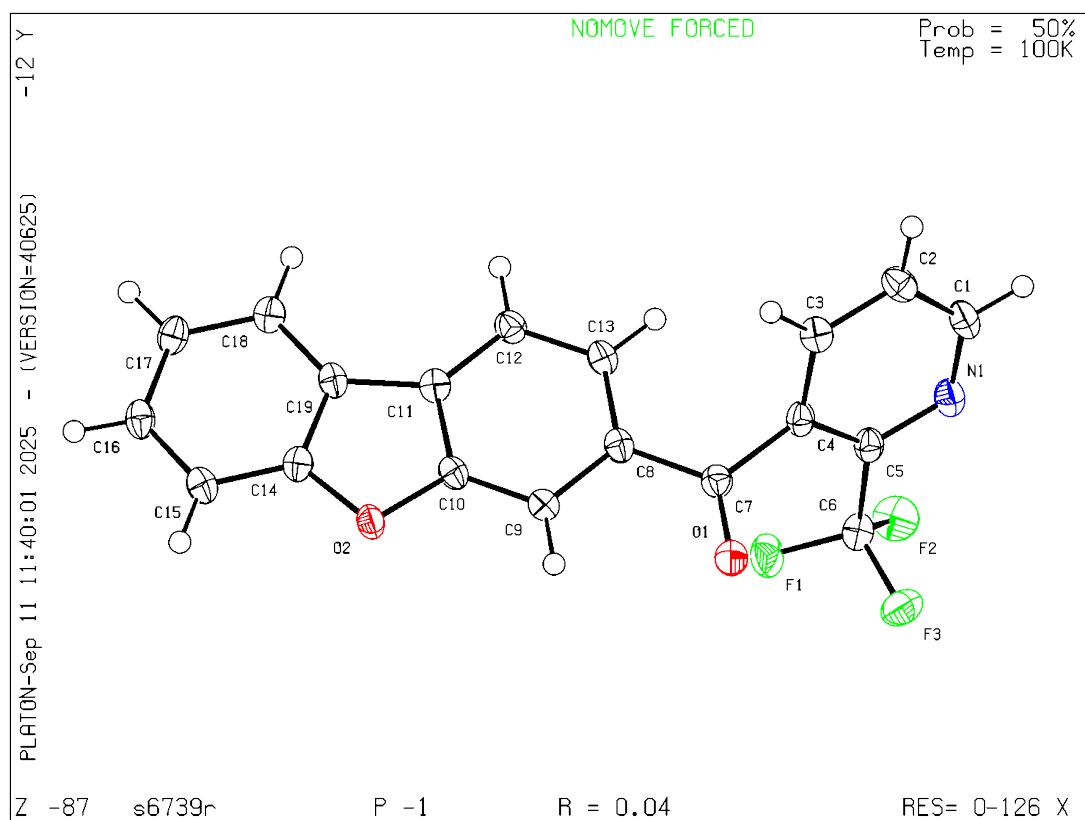

**X-Ray structure of (4-bromophenyl)(2-(chlorodifluoromethyl)pyridin-3-yl)methanone (17v)**

CCDC Deposition Number: 2515793

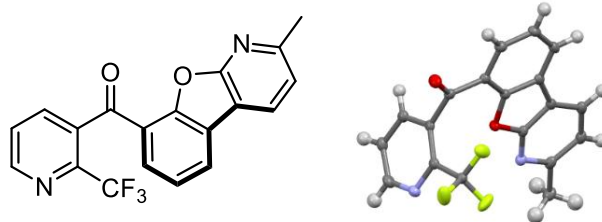

|                 |                |                    |                   |
|-----------------|----------------|--------------------|-------------------|
| Bond precision: | C-C = 0.0018 Å | Wavelength=1.54184 | Temperature:100 K |
| Cell:           | a=14.7181(2)   | b=7.14966(9)       | c=15.2683(2)      |
|                 | alpha=90       | beta=108.6911(14)  | gamma=90          |

|                | Calculated       | Reported         |
|----------------|------------------|------------------|
| Volume         | 1521.94(4)       | 1521.94(4)       |
| Space group    | P 21/c           | P 1 21/c 1       |
| Hall group     | -P 2ybc          | -P 2ybc          |
| Moiety formula | C19 H11 F3 N2 O2 | C19 H11 F3 N2 O2 |
| Sum formula    | C19 H11 F3 N2 O2 | C19 H11 F3 N2 O2 |
| Mr             | 356.30           | 356.30           |
| Dx,g cm-3      | 1.555            | 1.555            |
| Z              | 4                | 4                |
| Mu (mm-1)      | 1.094            | 1.094            |
| F000           | 728.0            | 728.0            |
| F000'          | 730.77           |                  |
| h,k,lmax       | 18,9,19          | 18,8,18          |
| Nref           | 3235             | 3120             |
| Tmin,Tmax      | 0.826,0.885      | 0.924,0.992      |
| Tmin'          | 0.826            |                  |

Correction method= #

Reported T Limits: Tmin=0.924 Tmax=0.992

AbsCorr = GAUSSIAN

Data completeness= 0.964

Theta(max)= 77.602

R(reflections)= 0.0330( 2863)

wR2(reflections)= 0.0856( 3120)

S = 1.043

Npar= 236

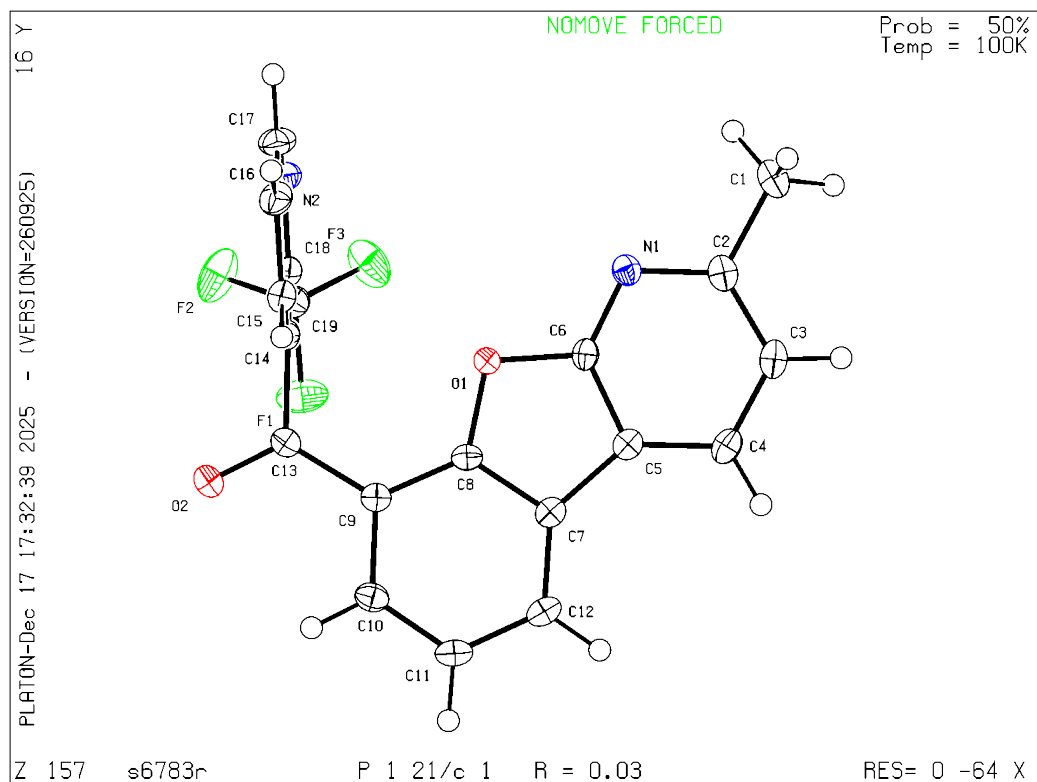

### X-Ray structure of 3-benzoylpicolinic acid (23)

CCDC Deposition Number: 2487299

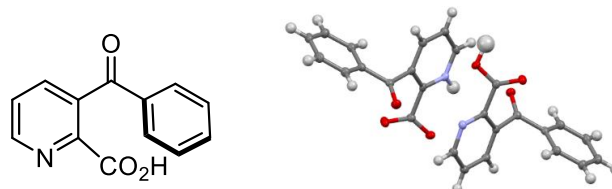

|                 |                |                    |                   |
|-----------------|----------------|--------------------|-------------------|
| Bond precision: | C-C = 0.0035 Å | Wavelength=1.54184 | Temperature:100 K |
| Cell:           | a=6.0757(1)    | b=24.4204(5)       | c=7.3631(2)       |
|                 | alpha=90       | beta=111.530(3)    | gamma=90          |

|                        | Calculated                                      | Reported                                        |
|------------------------|-------------------------------------------------|-------------------------------------------------|
| Volume                 | 1016.24(4)                                      | 1016.24(4)                                      |
| Space group            | P 21                                            | P 1 21 1                                        |
| Hall group             | P 2yb                                           | P 2yb                                           |
| Moiety formula         | C <sub>13</sub> H <sub>9</sub> N O <sub>3</sub> | C <sub>13</sub> H <sub>9</sub> N O <sub>3</sub> |
| Sum formula            | C <sub>13</sub> H <sub>9</sub> N O <sub>3</sub> | C <sub>13</sub> H <sub>9</sub> N O <sub>3</sub> |
| Mr                     | 227.21                                          | 227.21                                          |
| Dx, g cm <sup>-3</sup> | 1.485                                           | 1.485                                           |
| Z                      | 4                                               | 4                                               |
| Mu (mm <sup>-1</sup> ) | 0.889                                           | 0.889                                           |
| F000                   | 472.0                                           | 472.0                                           |
| F000'                  | 473.58                                          |                                                 |
| h,k,lmax               | 7,30,9                                          | 7,30,9                                          |
| Nref                   | 4262[ 2183]                                     | 3162                                            |

|           |             |             |
|-----------|-------------|-------------|
| Tmin,Tmax | 0.867,0.940 | 0.655,1.000 |
| Tmin'     | 0.867       |             |

Correction method= #

Reported T Limits: Tmin=0.655 Tmax=1.000

AbsCorr = GAUSSIAN

Data completeness= 1.45/0.74

Theta(max)= 76.177

R(reflections)= 0.0288( 3073)

wR2(reflections)= 0.0794( 3162)

S = 1.063

Npar= 315

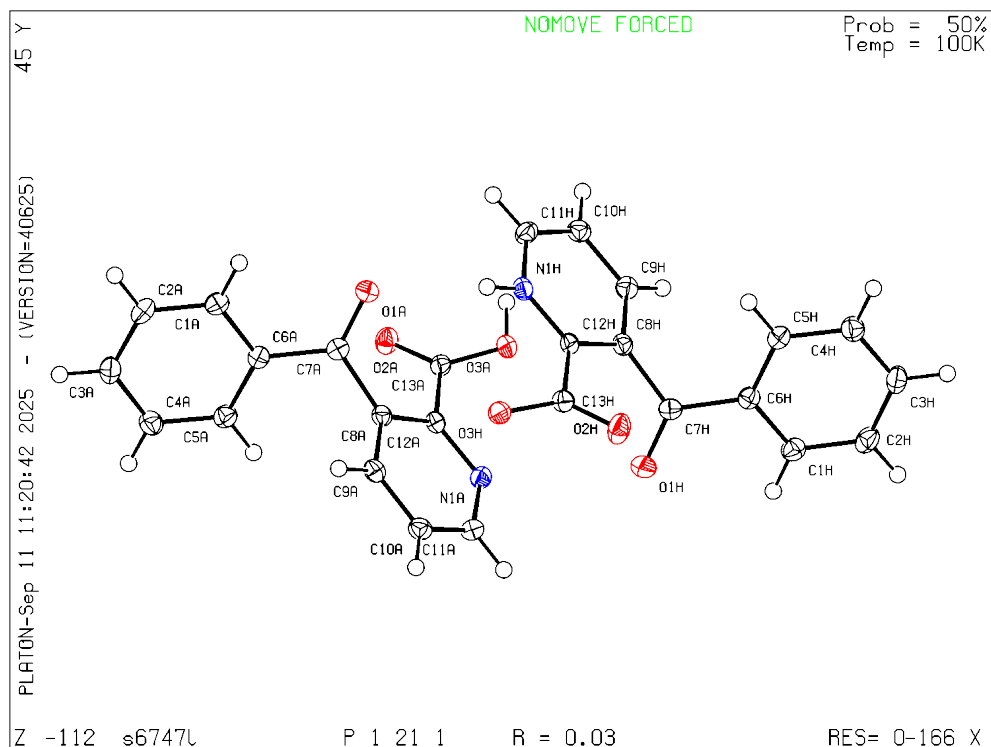

### X-Ray structure of (5-chloro-2-(trifluoromethyl)pyridin-3-yl)(phenyl)methanone (24b)

CCDC Deposition Number: 2475756

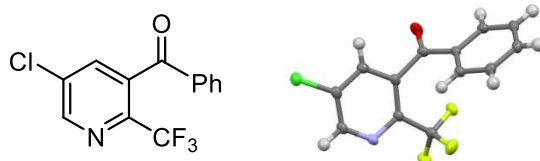

|                 |                |                    |                   |
|-----------------|----------------|--------------------|-------------------|
| Bond precision: | C-C = 0.0030 Å | Wavelength=1.54184 | Temperature:100 K |
| Cell:           | a=9.6528(4)    | b=7.5835(3)        | c=16.5958(6)      |
|                 | alpha=90       | beta=105.477(4)    | gamma=90          |

|             |            |            |
|-------------|------------|------------|
|             | Calculated | Reported   |
| Volume      | 1170.79(8) | 1170.79(7) |
| Space group | P 21/c     | P 1 21/c 1 |

|                |                  |                  |
|----------------|------------------|------------------|
| Hall group     | -P 2ybc          | -P 2ybc          |
| Moiety formula | C13 H7 Cl F3 N O | C13 H7 Cl F3 N O |
| Sum formula    | C13 H7 Cl F3 N O | C13 H7 Cl F3 N O |
| Mr             | 285.65           | 285.65           |
| Dx,g cm-3      | 1.621            | 1.621            |
| Z              | 4                | 4                |
| Mu (mm-1)      | 3.206            | 3.206            |
| F000           | 576.0            | 576.0            |
| F000'          | 579.53           |                  |
| h,k,lmax       | 12,9,21          | 12,9,20          |
| Nref           | 2496             | 2353             |
| Tmin,Tmax      | 0.760,0.914      | 0.740,1.000      |
| Tmin'          | 0.608            |                  |

Correction method= #

Reported T Limits: Tmin=0.740 Tmax=1.000

AbsCorr = GAUSSIAN

Data completeness= 0.943

Theta(max)= 77.377

R(reflections)= 0.0390(1919)

wR2(reflections)= 0.0972( 2353)

S = 1.057

Npar= 172

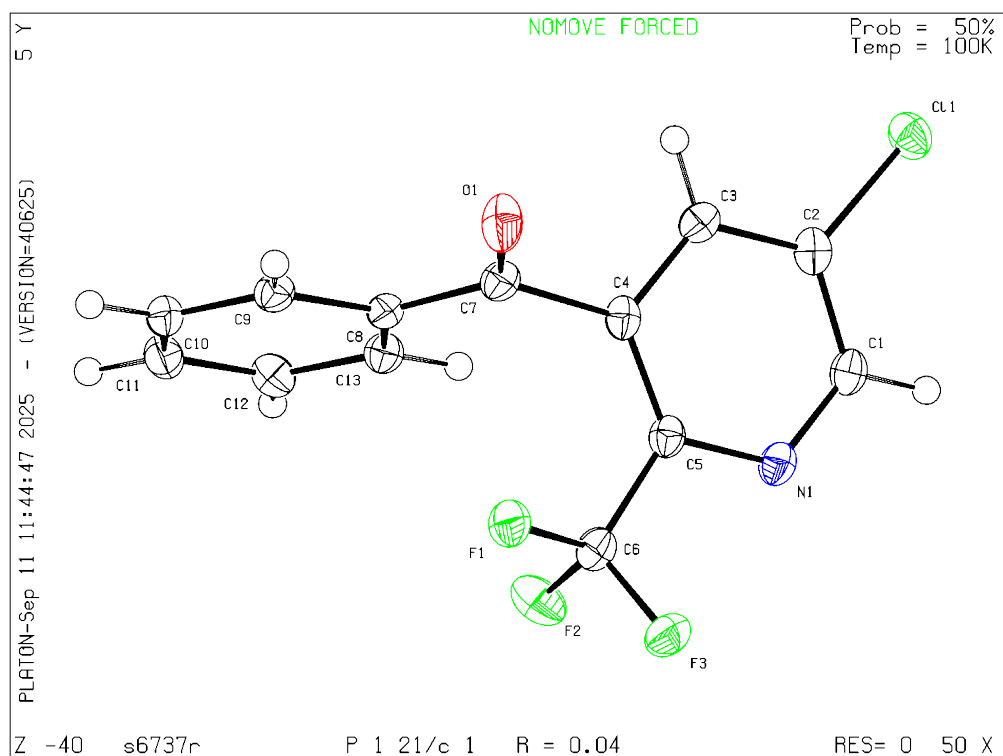

**X-Ray structure of (5-bromo-2-(trifluoromethyl)pyridin-3-yl)(phenyl)methanone (24c)**

CCDC Deposition Number: 2475750

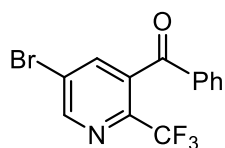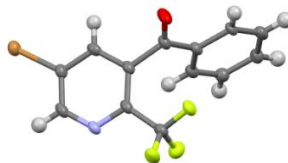

|                 |                |                    |                   |
|-----------------|----------------|--------------------|-------------------|
| Bond precision: | C-C = 0.0051 Å | Wavelength=1.54184 | Temperature:100 K |
| Cell:           | a=9.7276(3)    | b=7.63087(19)      | c=16.6784(5)      |
|                 | alpha=90       | beta=105.133(3)    | gamma=90          |

|                        | Calculated       | Reported         |
|------------------------|------------------|------------------|
| Volume                 | 1195.11(6)       | 1195.11(6)       |
| Space group            | P 21/c           | P 1 21/c 1       |
| Hall group             | -P 2ybc          | -P 2ybc          |
| Moiety formula         | C13 H7 Br F3 N O | C13 H7 Br F3 N O |
| Sum formula            | C13 H7 Br F3 N O | C13 H7 Br F3 N O |
| Mr                     | 330.10           | 330.10           |
| Dx,g cm <sup>-3</sup>  | 1.835            | 1.835            |
| Z                      | 4                | 4                |
| Mu (mm <sup>-1</sup> ) | 5.002            | 5.002            |
| F000                   | 648.0            | 648.0            |
| F000'                  | 647.36           |                  |
| h,k,lmax               | 12,9,21          | 12,9,20          |
| Nref                   | 2559             | 2423             |
| Tmin,Tmax              | 0.728,0.878      | 0.571,1.000      |
| Tmin'                  | 0.327            |                  |

Correction method= #

Reported T Limits: Tmin=0.571 Tmax=1.000

AbsCorr = GAUSSIAN

Data completeness= 0.947

Theta(max)= 78.071

R(reflections)= 0.0430( 2057)

wR2(reflections)= 0.1198( 2423)

S = 1.081

Npar= 172

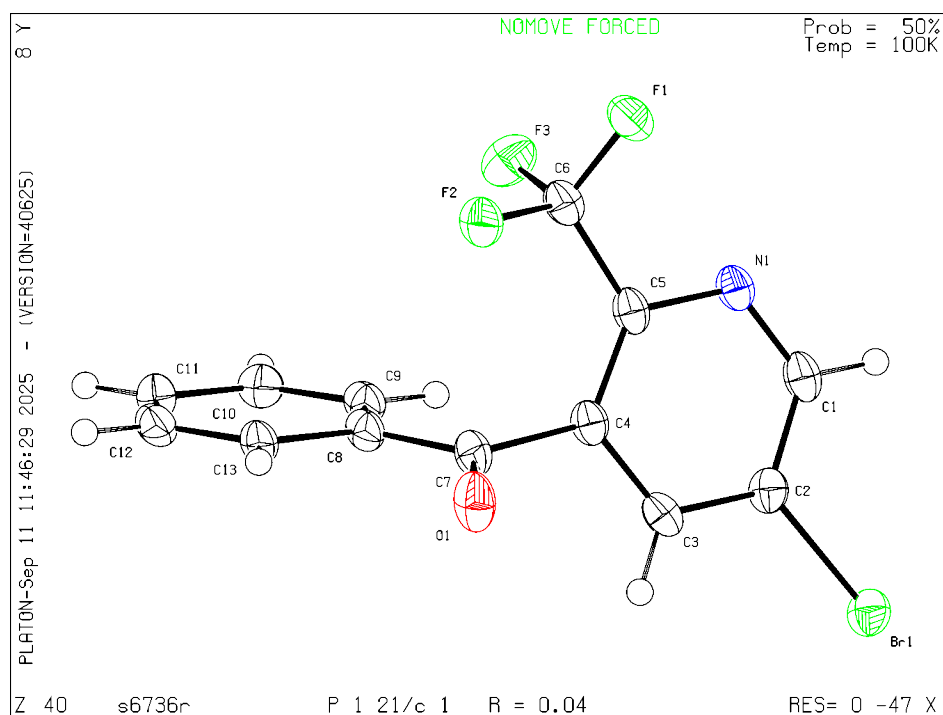

**X-Ray structure of (4-(4-methoxyphenyl)-2-(trifluoromethyl)pyridin-3-yl)(phenyl)methanone (25a)**

CCDC Deposition Number: 2475751

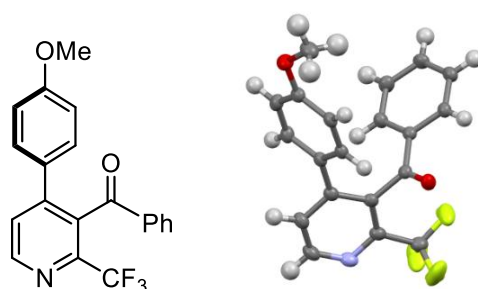

|                 |                |                    |                   |
|-----------------|----------------|--------------------|-------------------|
| Bond precision: | C-C = 0.0020 Å | Wavelength=1.54184 | Temperature:100 K |
| Cell:           | a=8.3940(2)    | b=21.4396(5)       | c=9.3120(2)       |
|                 | alpha=90       | beta=90.923(2)     | gamma=90          |

|                        | Calculated                                                      | Reported                                                        |
|------------------------|-----------------------------------------------------------------|-----------------------------------------------------------------|
| Volume                 | 1675.61(7)                                                      | 1675.62(7)                                                      |
| Space group            | P 21/n                                                          | P 1 21/n 1                                                      |
| Hall group             | -P 2yn                                                          | -P 2yn                                                          |
| Moiety formula         | C <sub>20</sub> H <sub>14</sub> F <sub>3</sub> N O <sub>2</sub> | C <sub>20</sub> H <sub>14</sub> F <sub>3</sub> N O <sub>2</sub> |
| Sum formula            | C <sub>20</sub> H <sub>14</sub> F <sub>3</sub> N O <sub>2</sub> | C <sub>20</sub> H <sub>14</sub> F <sub>3</sub> N O <sub>2</sub> |
| Mr                     | 357.32                                                          | 357.32                                                          |
| Dx, g cm <sup>-3</sup> | 1.416                                                           | 1.416                                                           |
| Z                      | 4                                                               | 4                                                               |
| Mu (mm <sup>-1</sup> ) | 0.974                                                           | 0.974                                                           |
| F000                   | 736.0                                                           | 736.0                                                           |
| F000'                  | 738.74                                                          |                                                                 |
| h,k,lmax               | 10,27,11                                                        | 10,26,11                                                        |
| Nref                   | 3516                                                            | 3432                                                            |

|           |             |             |
|-----------|-------------|-------------|
| Tmin,Tmax | 0.962,0.968 | 0.968,1.000 |
| Tmin'     | 0.953       |             |

Correction method= #

Reported T Limits: Tmin=0.968 Tmax=1.000

AbsCorr = GAUSSIAN

Data completeness= 0.976

Theta(max)= 76.359

R(reflections)= 0.0374(2824)

wR2(reflections)= 0.1015(3432)

S = 1.051

Npar= 265

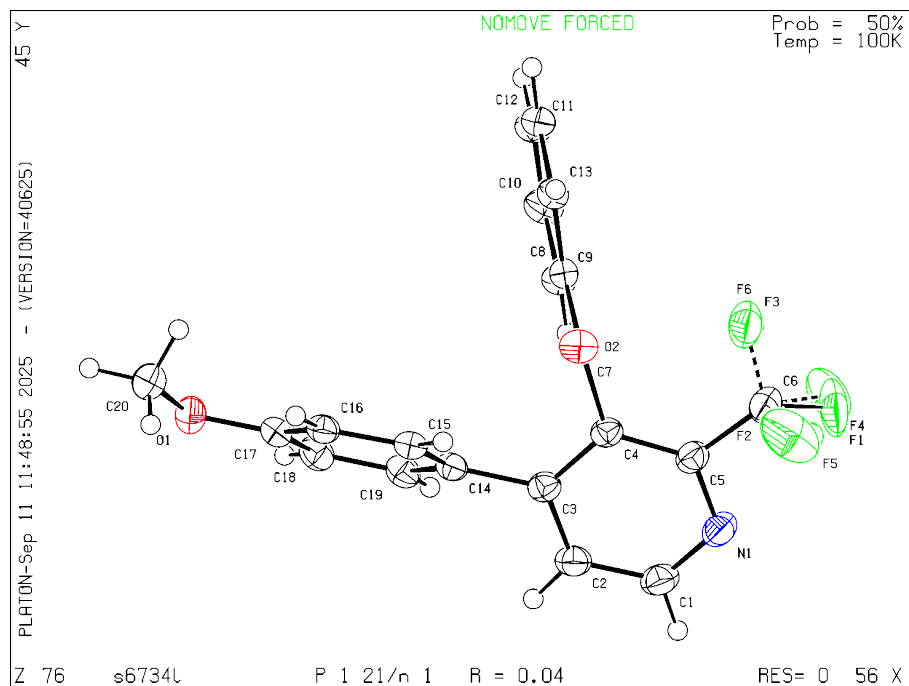

**X-Ray structure of (4-(dibenzo[*b,d*]furan-2-yl)-2-(trifluoromethyl)pyridin-3-yl)(phenyl)methanone (25d)**

CCDC Deposition Number: 2475672

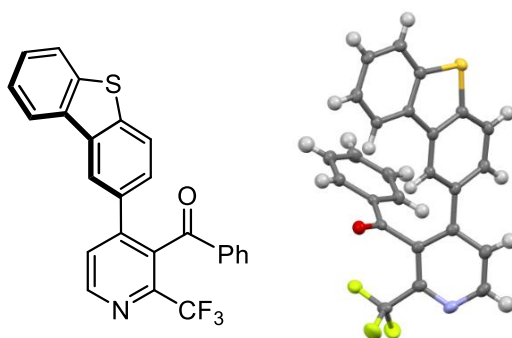

|                 |                |                    |                   |
|-----------------|----------------|--------------------|-------------------|
| Bond precision: | C-C = 0.0023 Å | Wavelength=1.54184 | Temperature:100 K |
| Cell:           | a=8.36426(13)  | b=25.5739(4)       | c=9.21252(14)     |
|                 | alpha=90       | beta=91.2344(14)   | gamma=90          |

|                        | Calculated                                           | Reported                                             |
|------------------------|------------------------------------------------------|------------------------------------------------------|
| Volume                 | 1970.16(5)                                           | 1970.16(5)                                           |
| Space group            | P 21/n                                               | P 1 21/n 1                                           |
| Hall group             | -P 2yn                                               | -P 2yn                                               |
| Moiety formula         | C <sub>25</sub> H <sub>14</sub> F <sub>3</sub> N O S | C <sub>25</sub> H <sub>14</sub> F <sub>3</sub> N O S |
| Sum formula            | C <sub>25</sub> H <sub>14</sub> F <sub>3</sub> N O S | C <sub>25</sub> H <sub>14</sub> F <sub>3</sub> N O S |
| Mr                     | 433.43                                               | 433.43                                               |
| Dx,g cm <sup>-3</sup>  | 1.461                                                | 1.461                                                |
| Z                      | 4                                                    | 4                                                    |
| Mu (mm <sup>-1</sup> ) | 1.867                                                | 1.867                                                |
| F000                   | 888.0                                                | 888.0                                                |
| F000'                  | 892.23                                               |                                                      |
| h,k,lmax               | 10,32,11                                             | 10,32,11                                             |
| Nref                   | 4213                                                 | 4032                                                 |
| Tmin,Tmax              | 0.845,0.906                                          | 0.874,0.978                                          |
| Tmin'                  | 0.814                                                |                                                      |

Correction method= #

Reported T Limits: Tmin=0.874 Tmax=1.000

AbsCorr = GAUSSIAN

Data completeness= 0.957

Theta(max)= 77.990

R(reflections)= 0.0375(3333)

wR2(reflections)= 0.0943(4032)

S = 1.048

Npar= 280

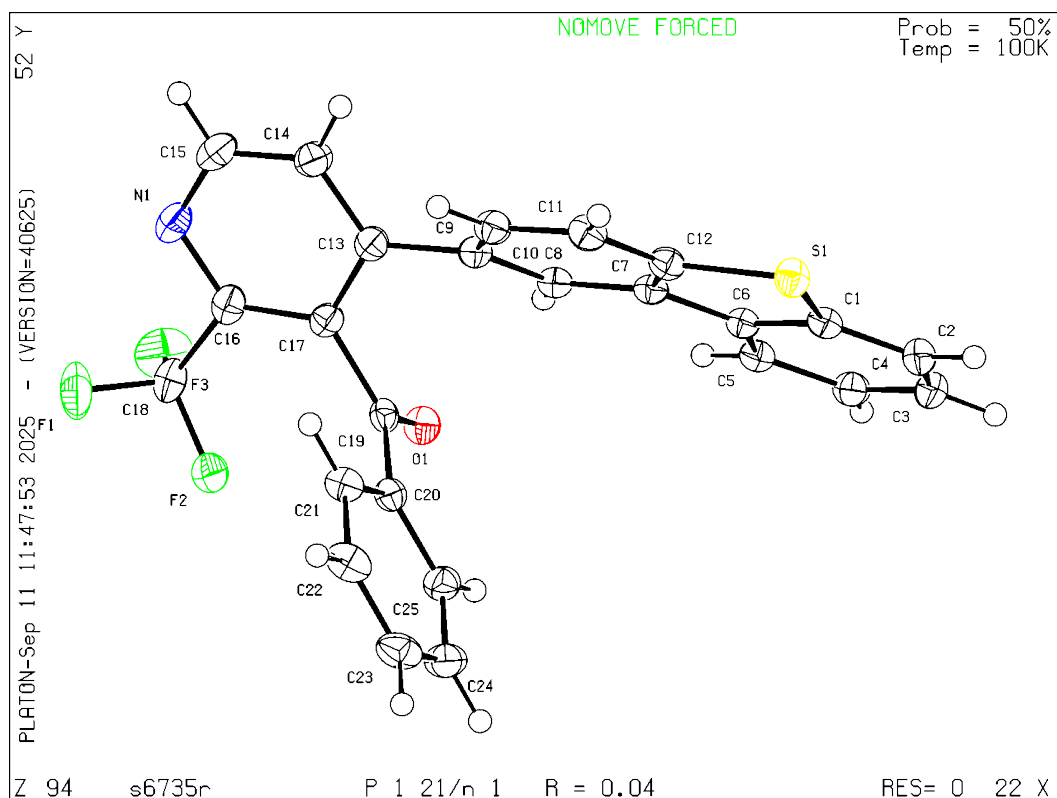

## 12. References

1. Z. Liu and M. F. Greaney, *Angew. Chem. Int. Ed.*, 2025, **64**, e202512321.
2. H. Huang, J. Cai, L. Tang, Z. Wang, F. Li and G.-J. Deng, *J. Org. Chem.*, 2016, **81**, 1499–1505.
3. M. C. Hilton, X. Zhang, B. T. Boyle, J. V. Alegre-Requena, R. S. Paton and A. McNally, *Science*, 2018, **362**, 799–804.
4. S. Bhowmick, A. Awasthi, K. Tiwari, P. Yadav and D. K. Tiwari, *Org. Lett.*, 2025, **27**, 2289–2294.
5. S. Panda, A. Coffin, Q. N. Nguyen, D. J. Tantillo and J. M. Ready, *Angew. Chem. Int. Ed.*, 2016, **55**, 2205–2209.
6. X. Duan, R. Sun, J. Tang, S. Li, X. Zheng, R. Li, H. Chen, H. Fu and M. Yuan, *J. Org. Chem.*, 2022, **87**, 7975–7988.
7. H. Wang and M. F. Greaney, *Angew. Chem. Int. Ed.*, 2024, **63**, e202315.
8. H. Natsugari, Y. Ikeura, Y. Kiyota, Y. Ishichi, T. Ishimaru, O. Saga, H. Shirafuji, T. Tanaka and I. Kamo, *J. Med. Chem.*, 1995, **38**, 3106–3120.

### 13. NMR Spectra

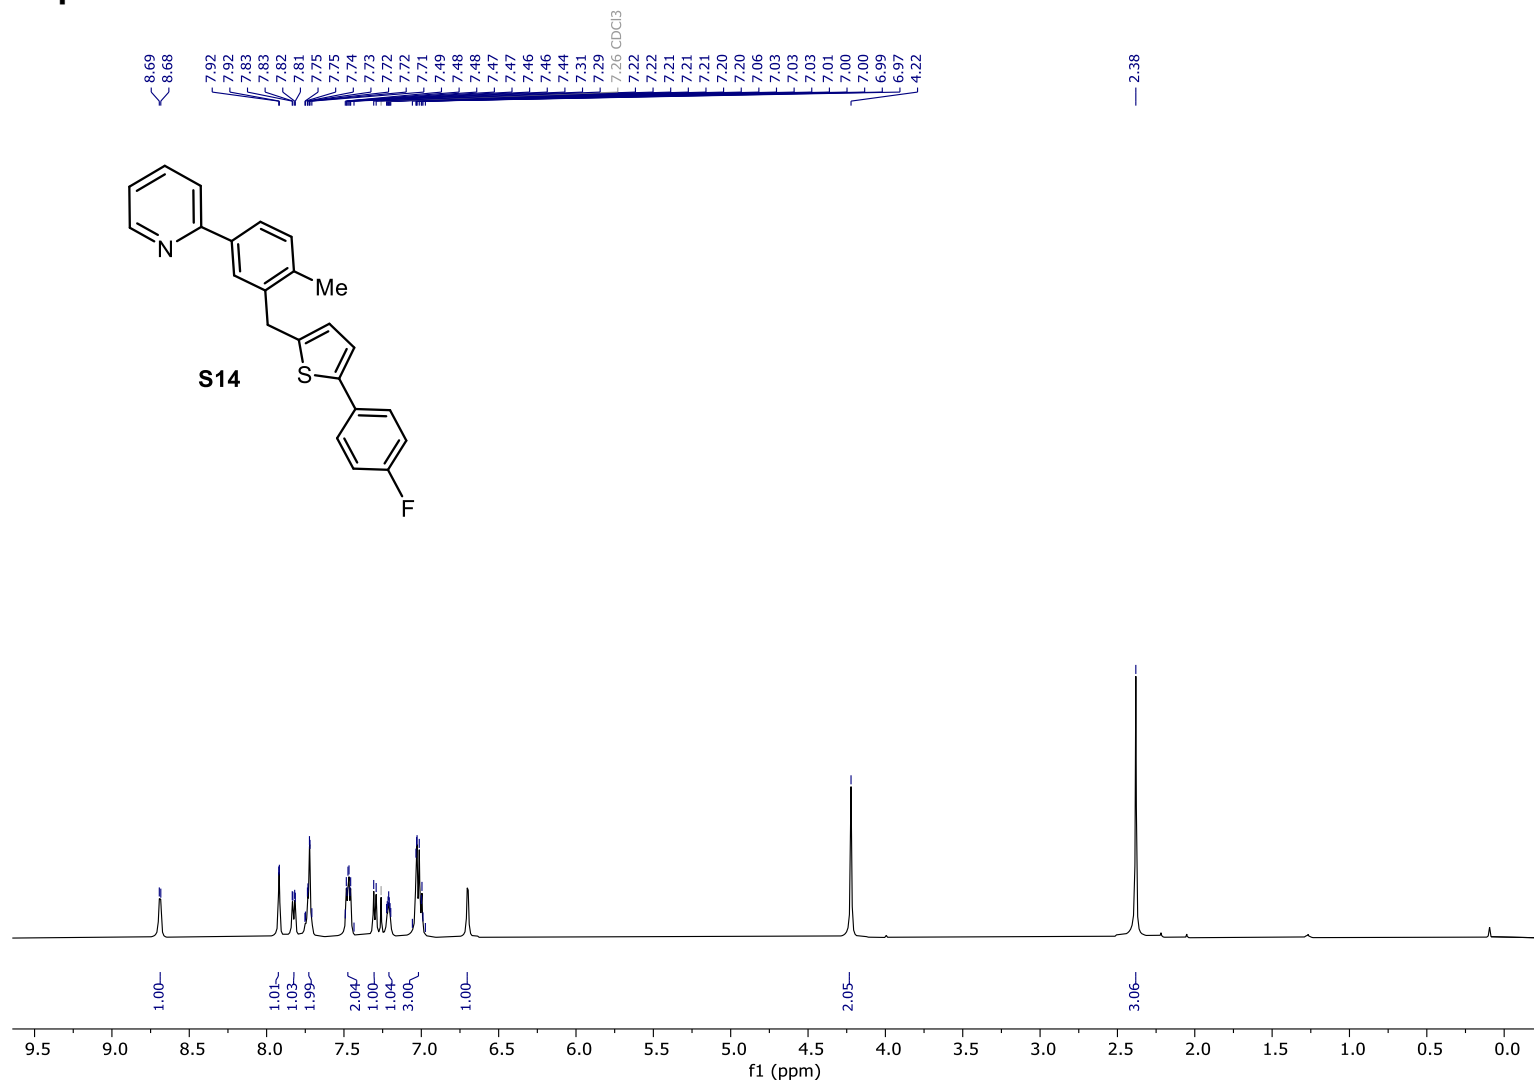

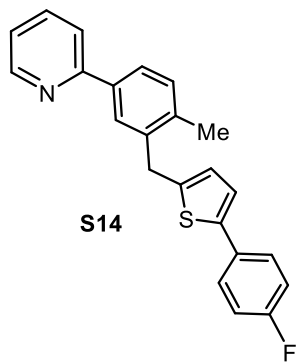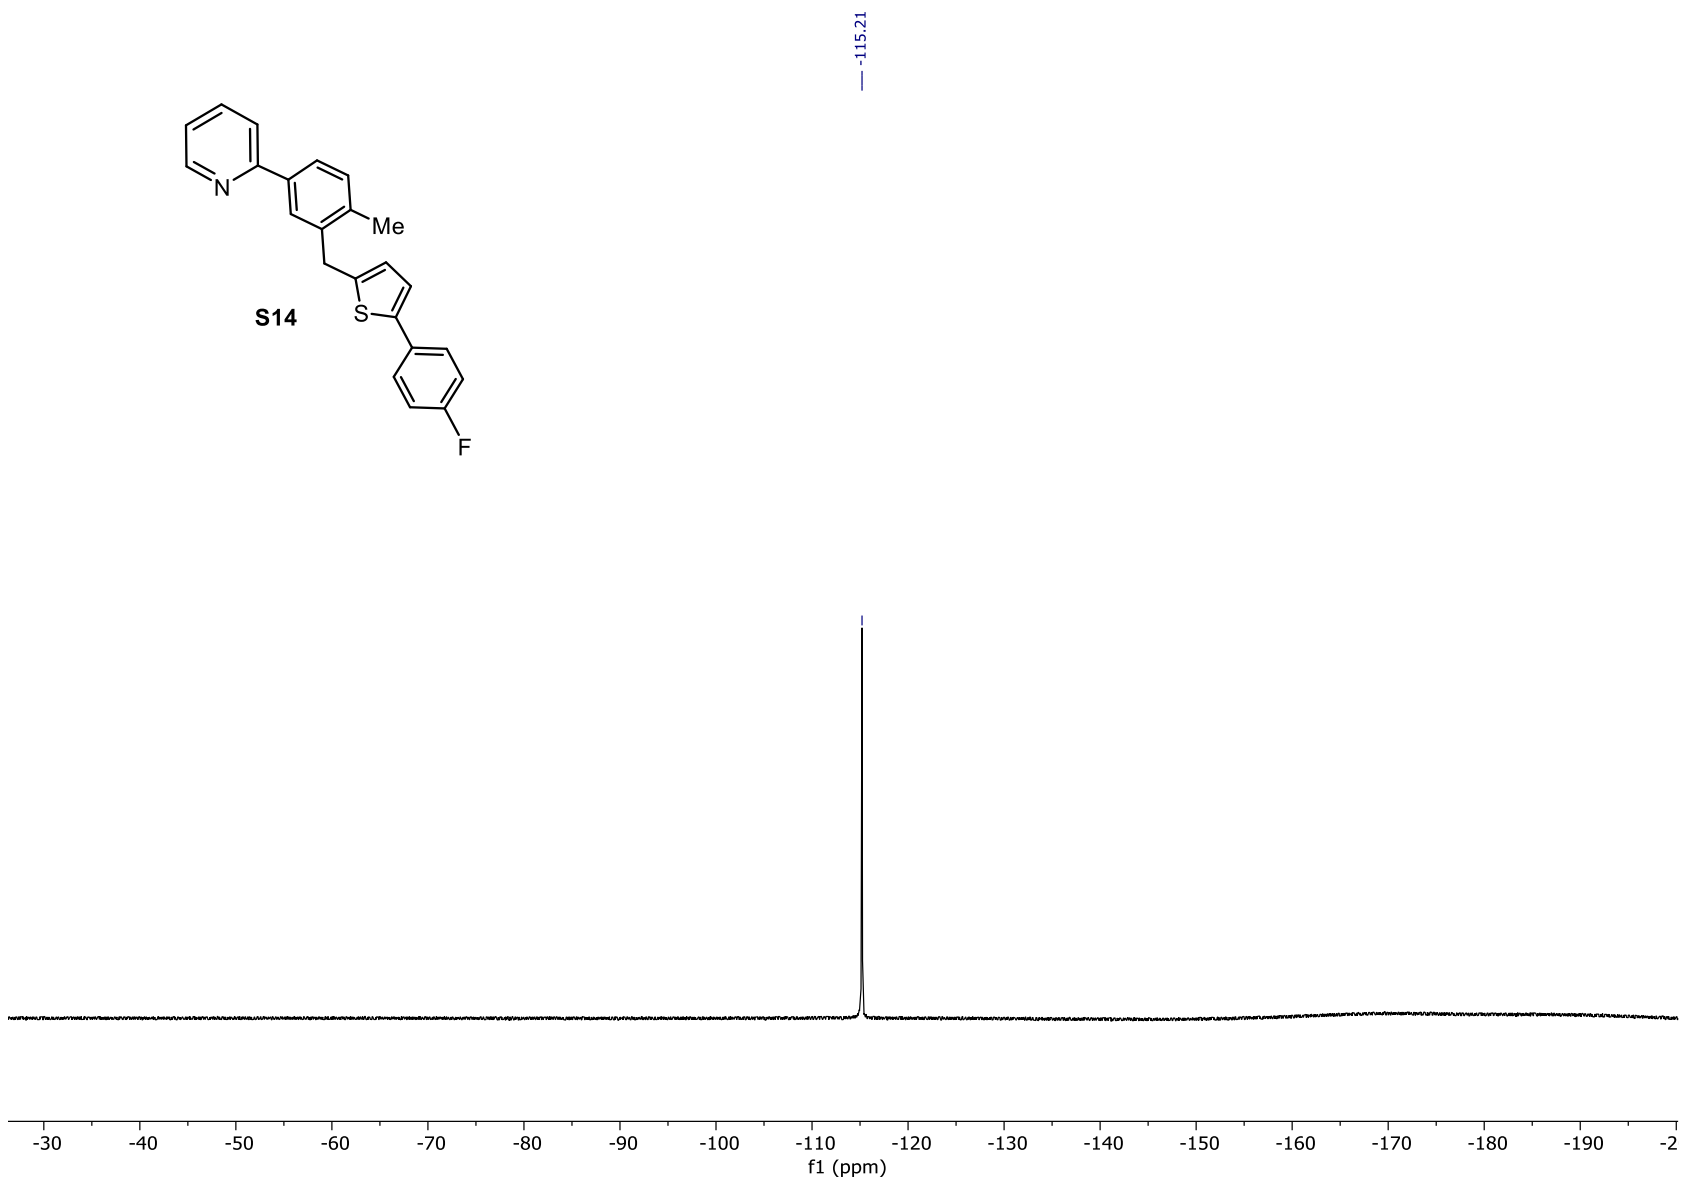

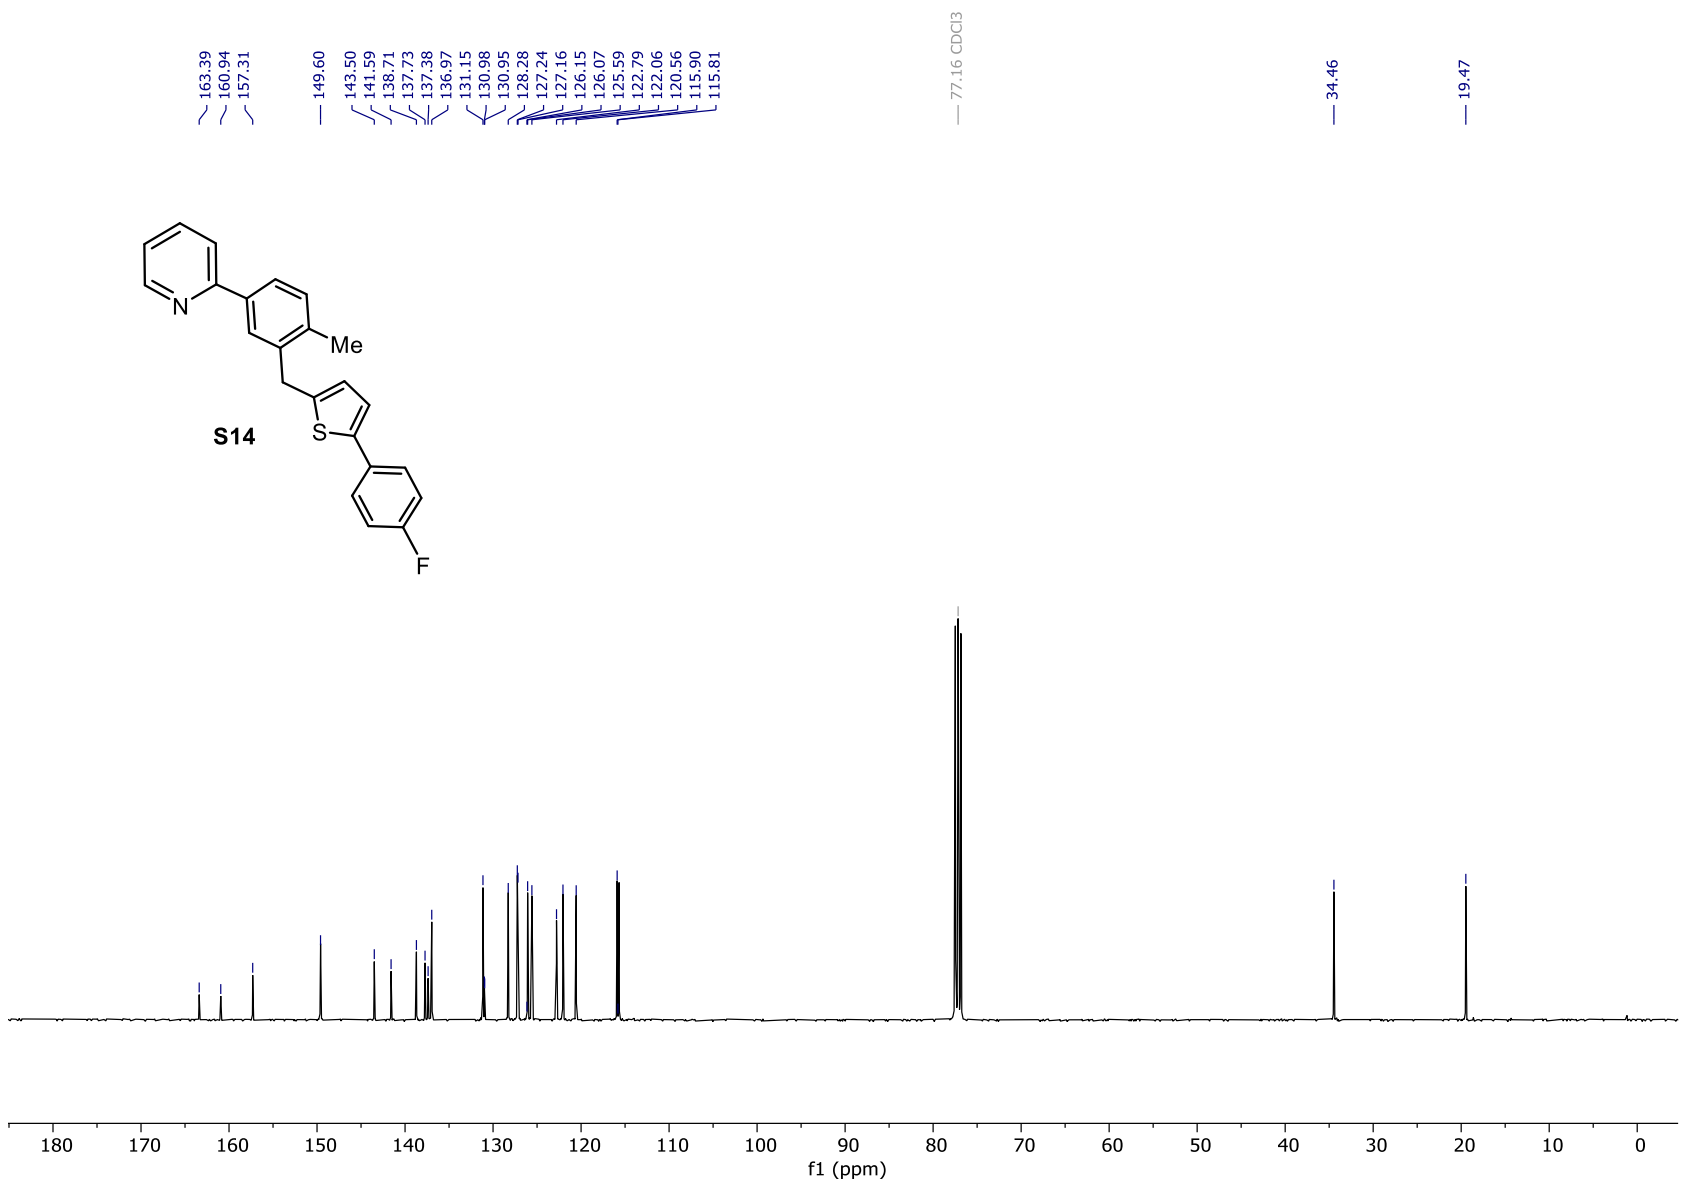

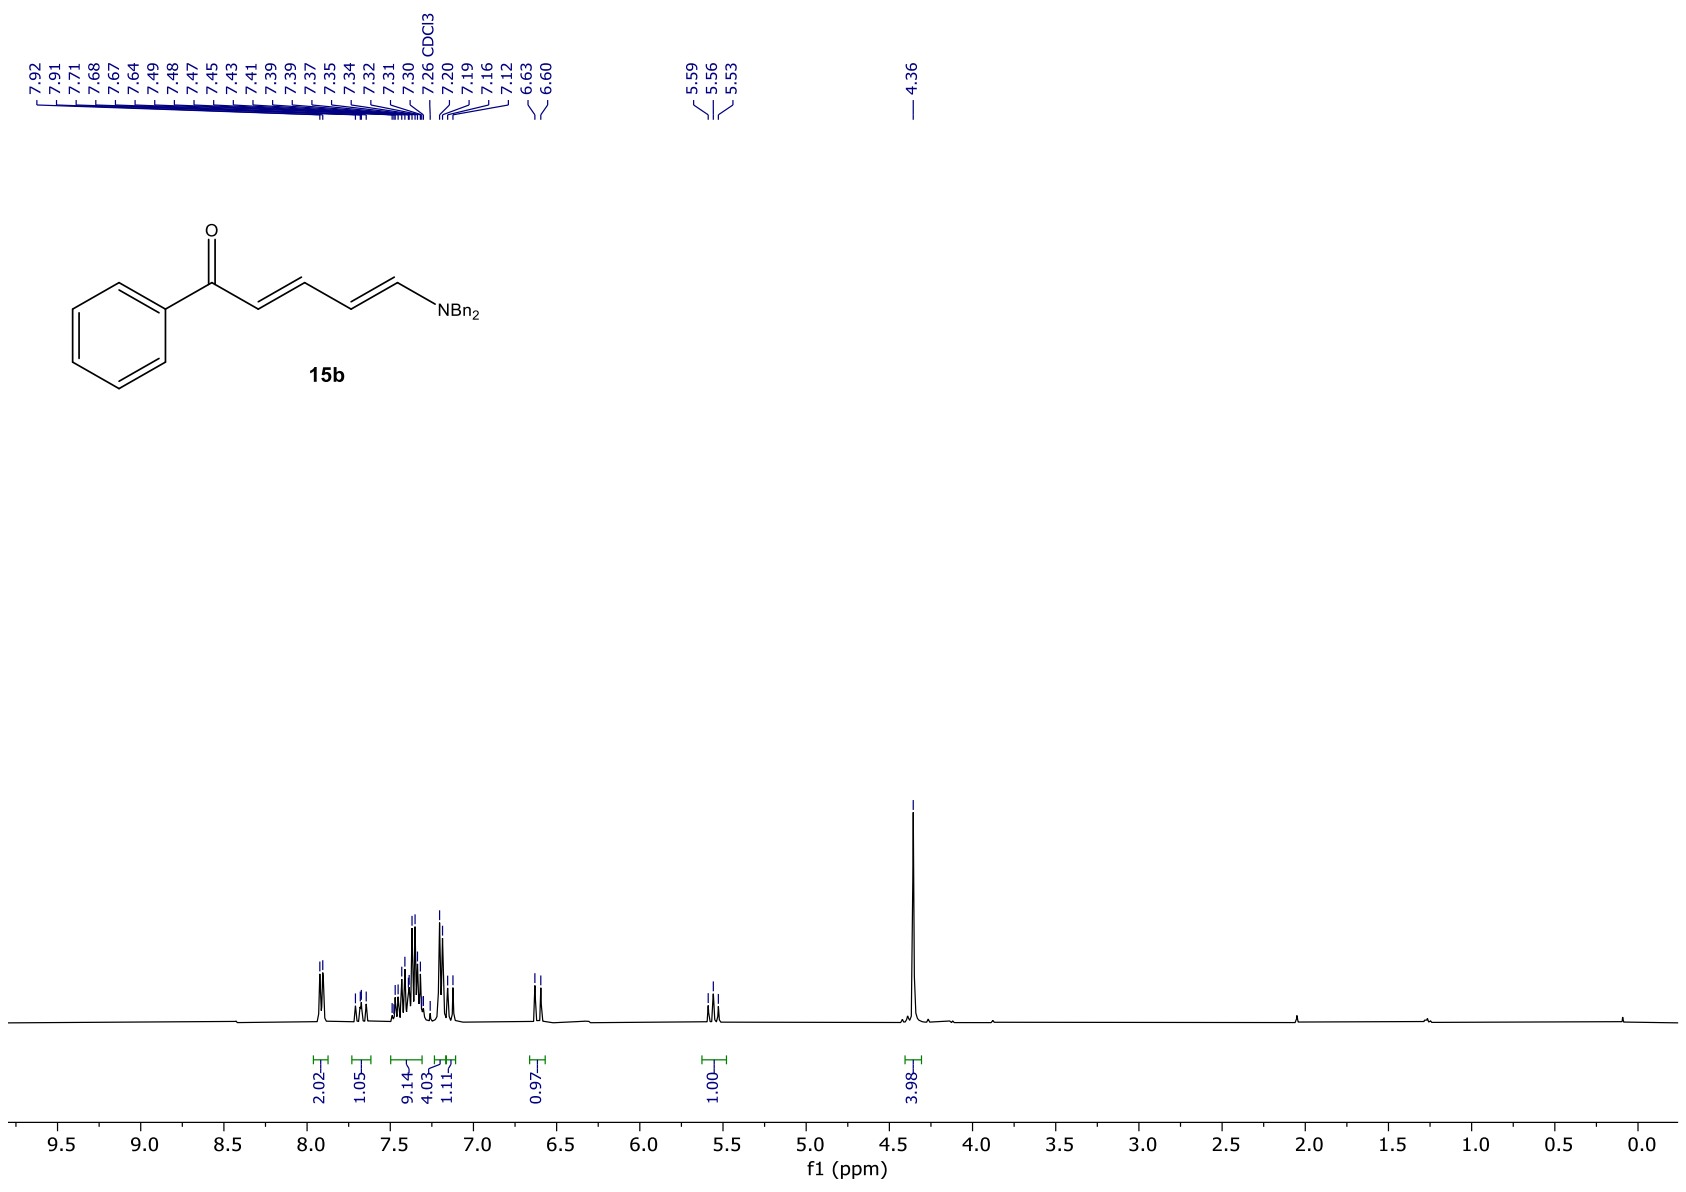

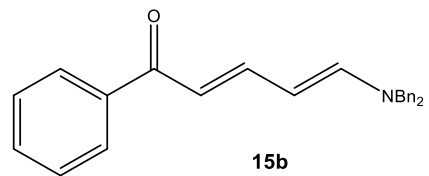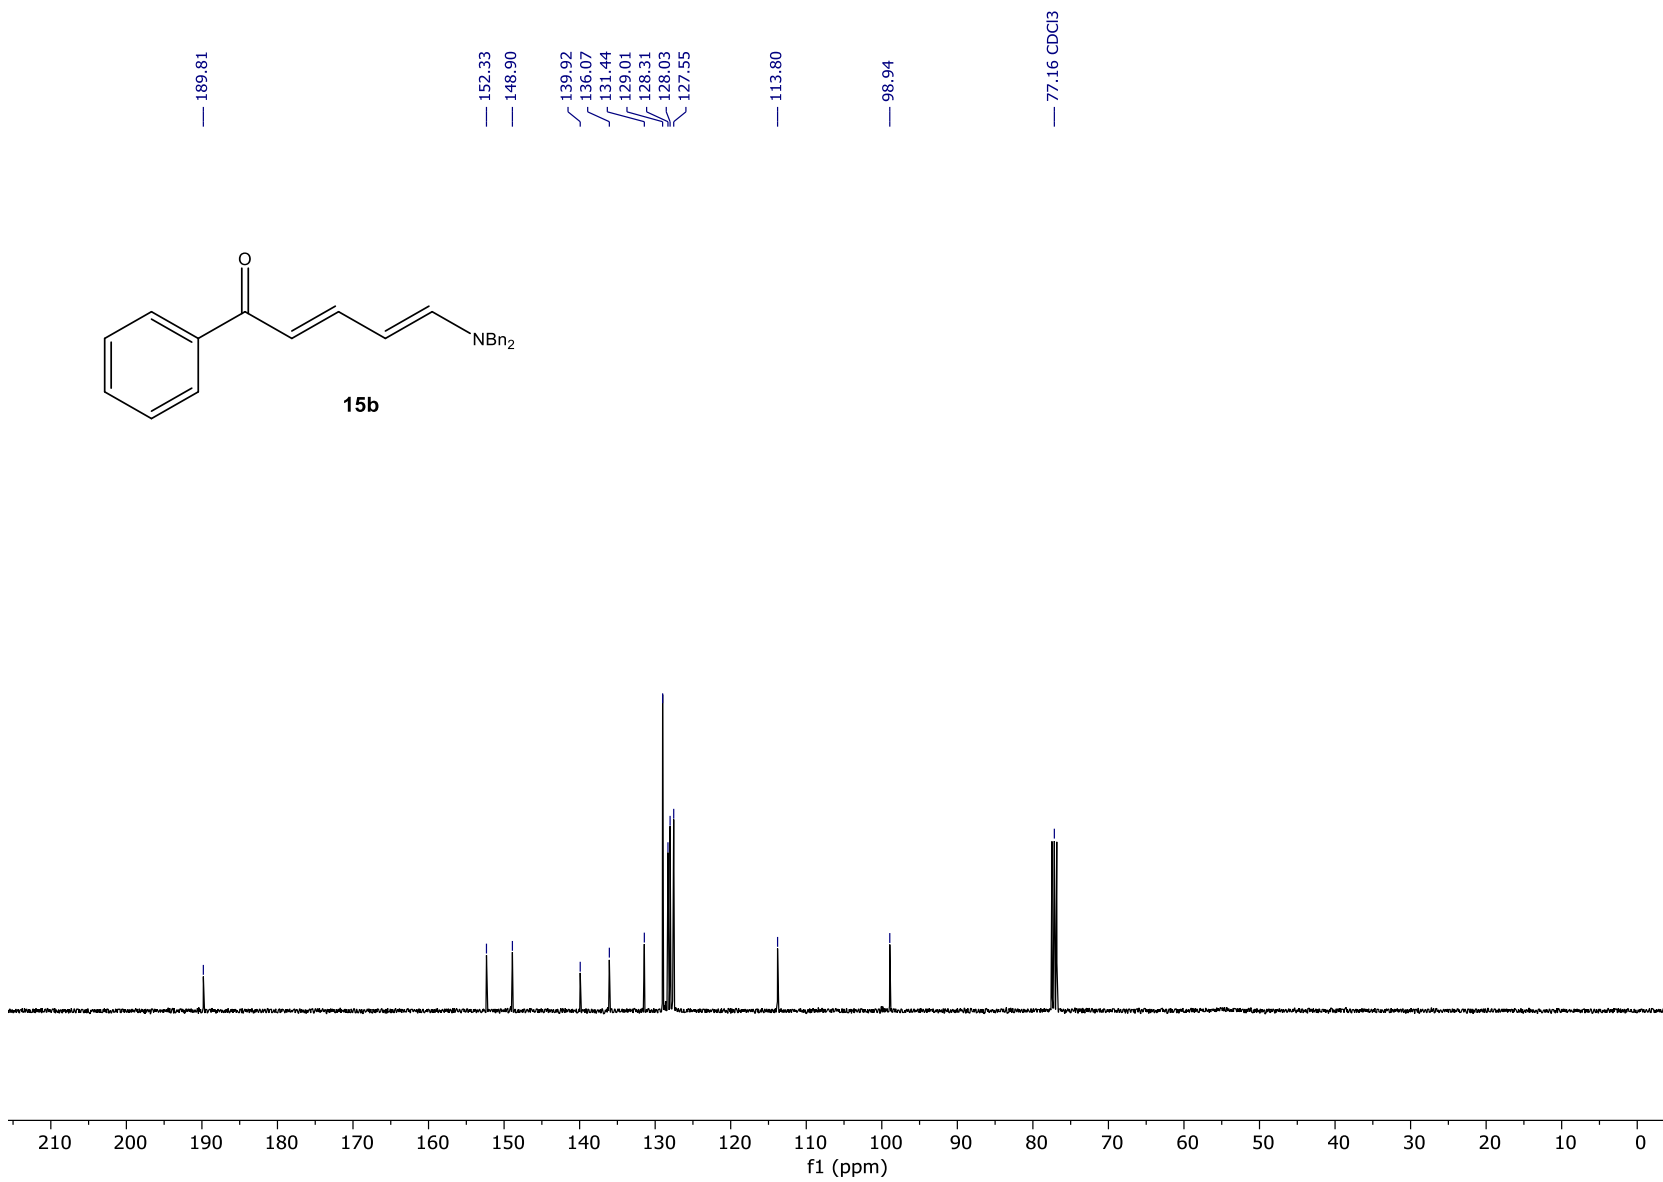

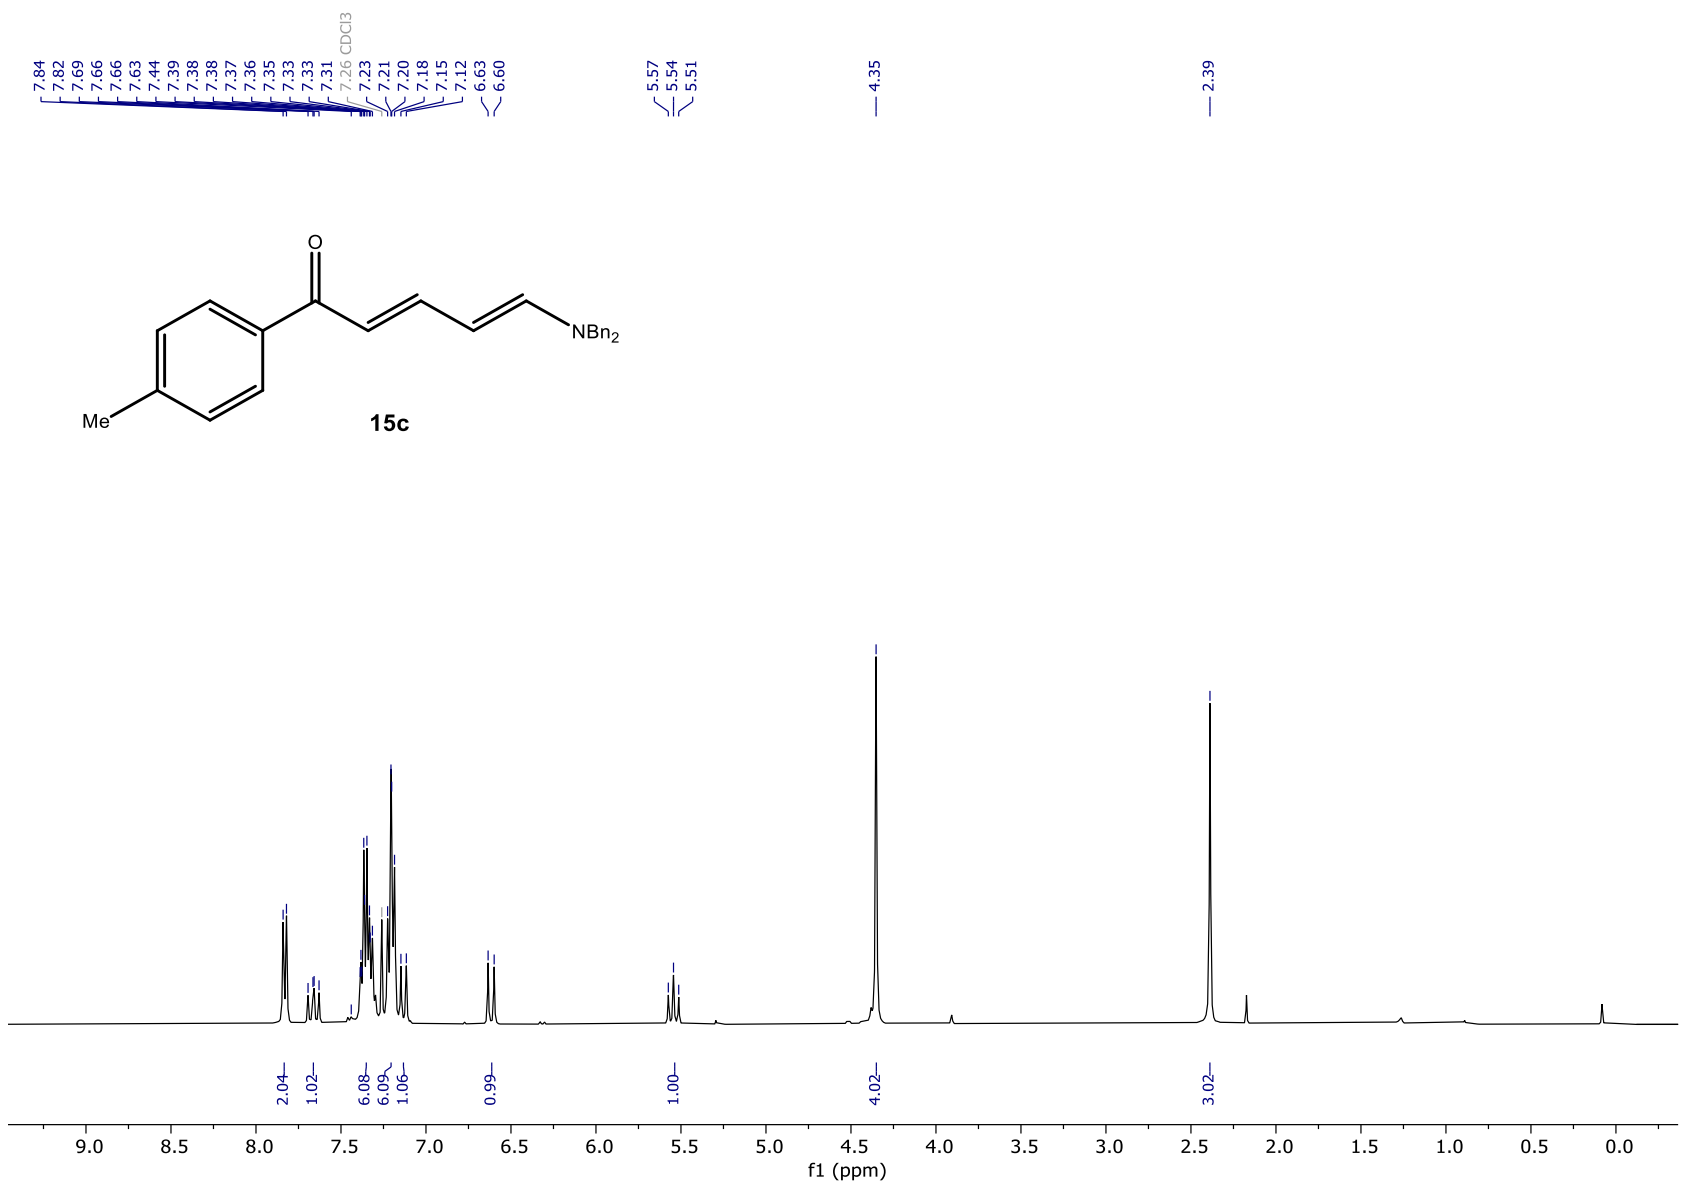

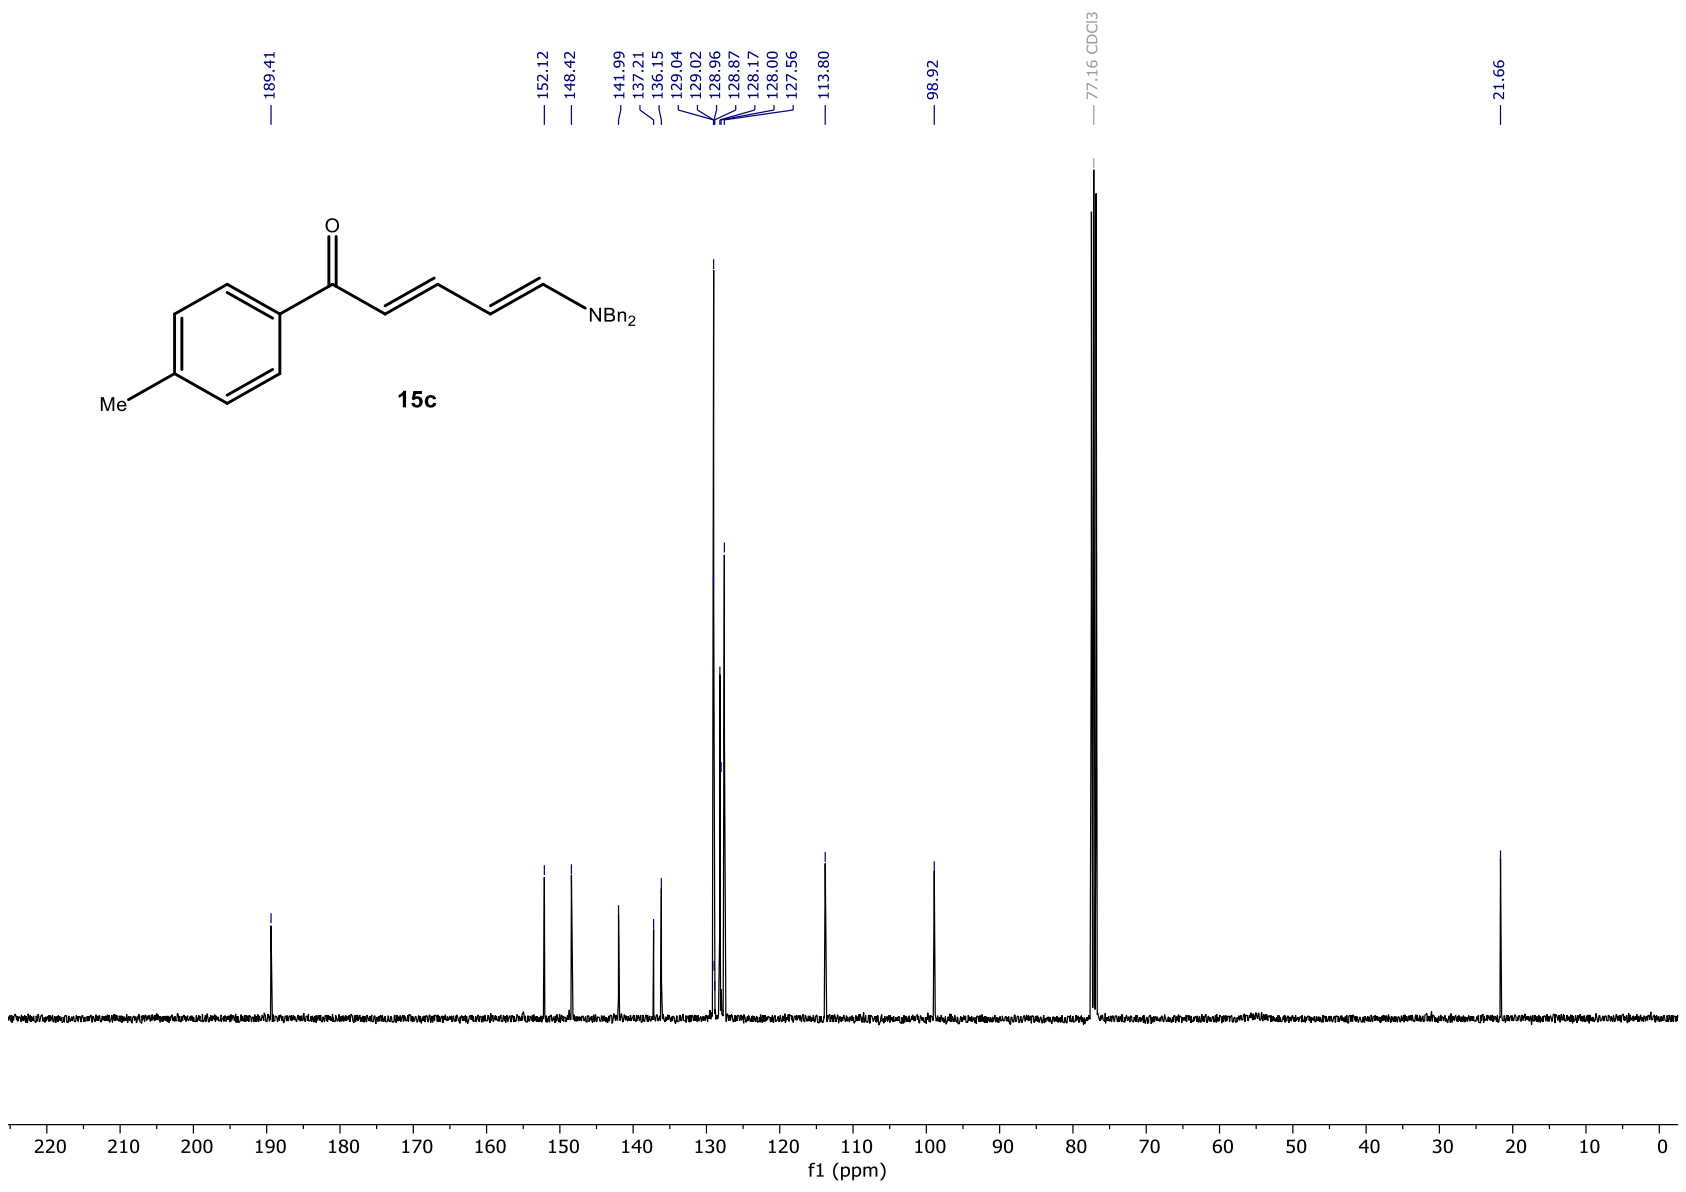

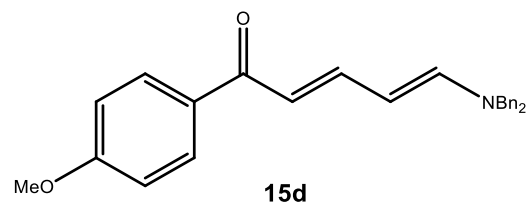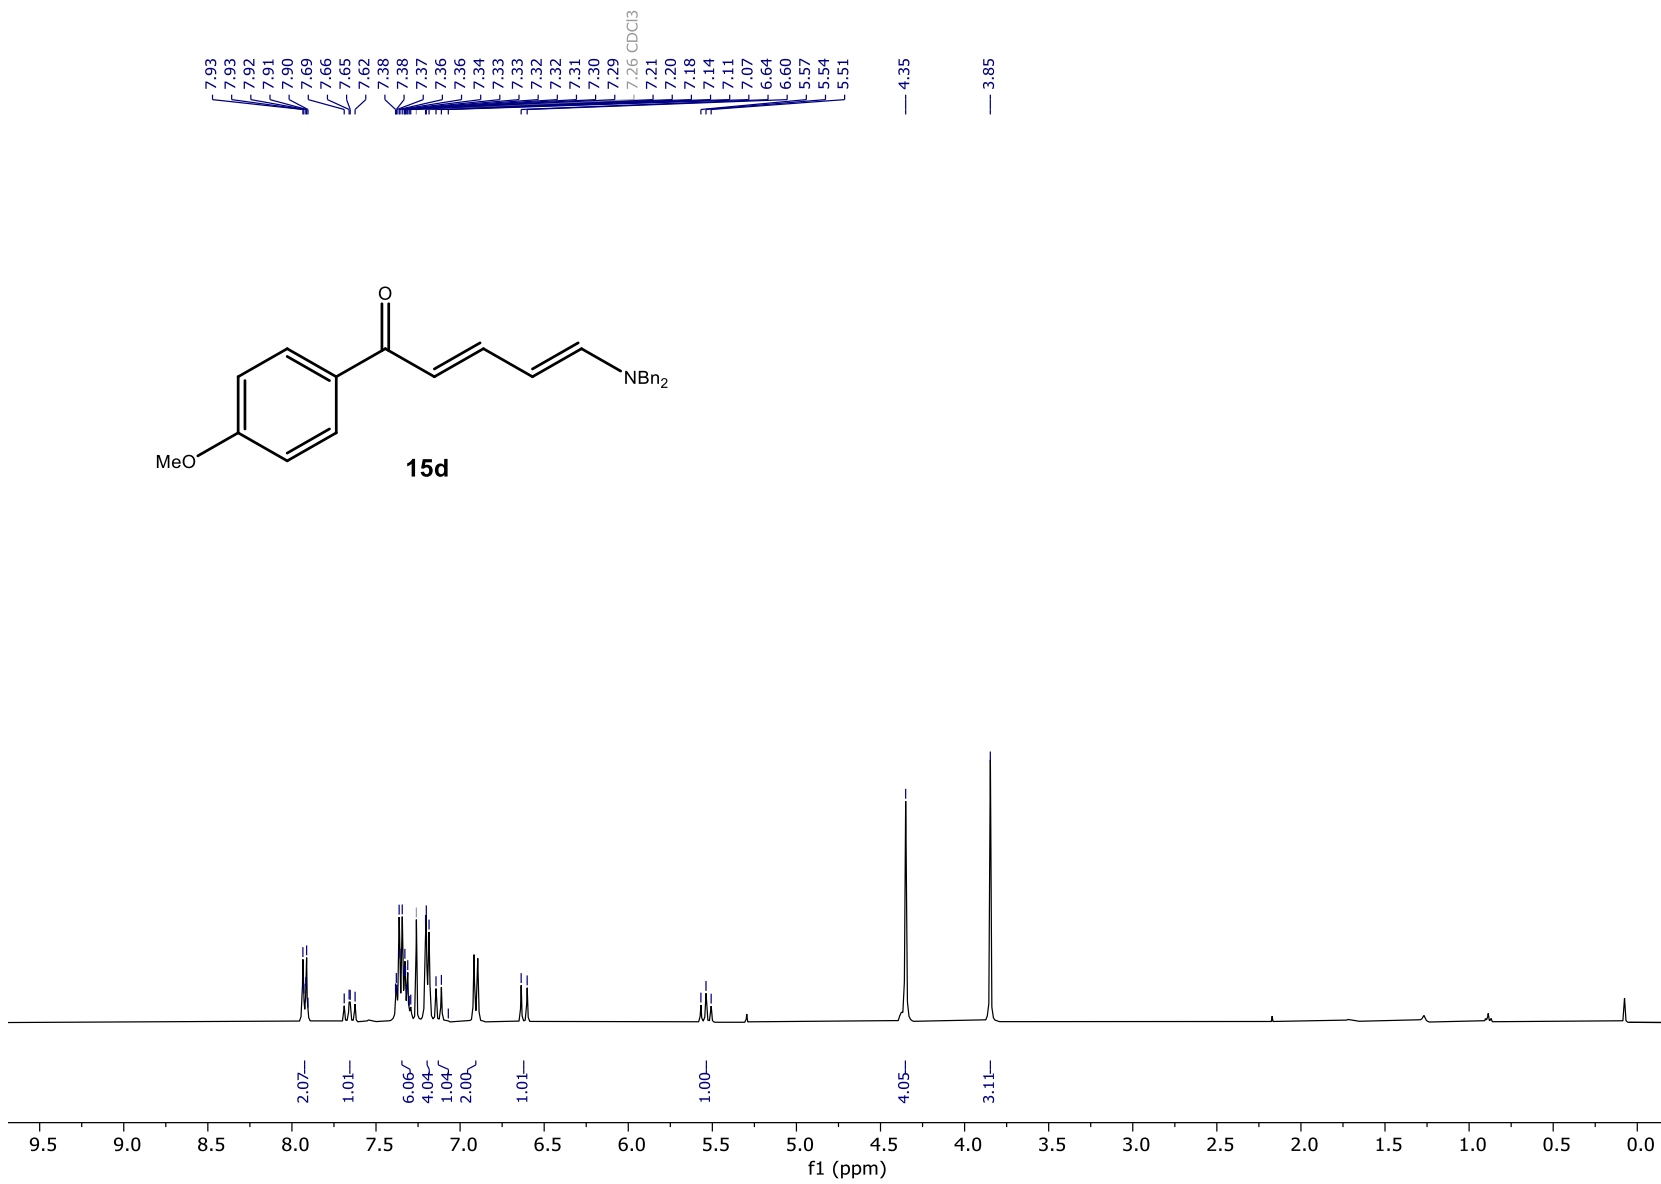

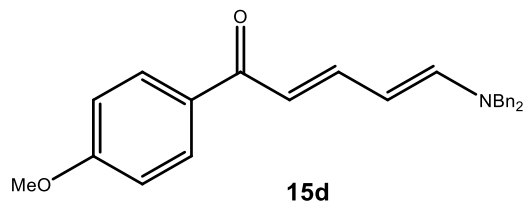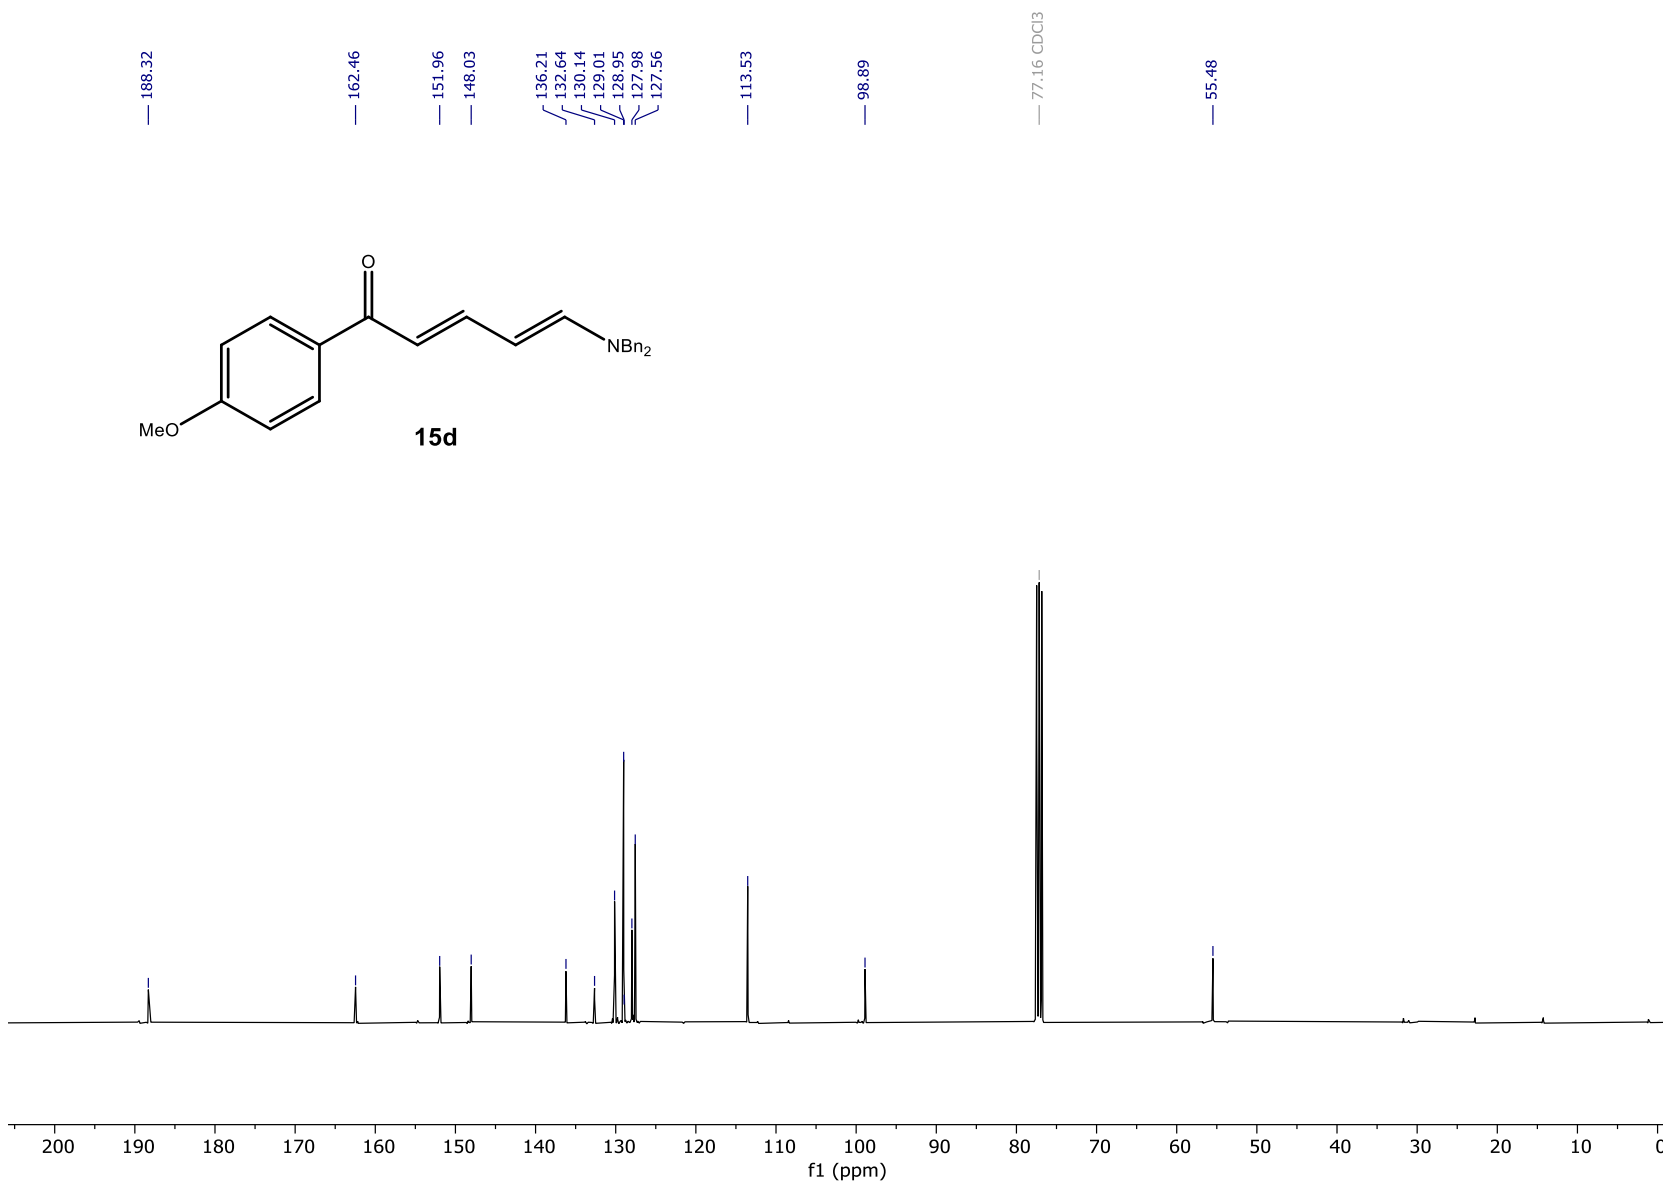

7.92  
7.91  
7.90  
7.89  
7.88  
7.88  
7.71  
7.70  
7.67  
7.67  
7.64  
7.47  
7.45  
7.44  
7.44  
7.42  
7.42  
7.39  
7.39  
7.38  
7.38  
7.38  
7.37  
7.36  
7.35  
7.35  
7.33  
7.33  
7.33  
7.32  
7.32  
7.31  
7.30  
7.30  
7.30  
7.29  
7.29  
7.26 CDCl3  
7.22  
7.20  
7.20  
7.19  
7.19  
7.16  
7.14  
6.81  
6.79  
6.79  
6.78  
6.77  
6.76  
6.75  
6.74  
6.72  
6.63  
6.60  
5.85  
5.84  
5.81  
5.58  
5.56  
5.53  
5.50  
5.35  
5.34  
5.33  
5.32  
4.36

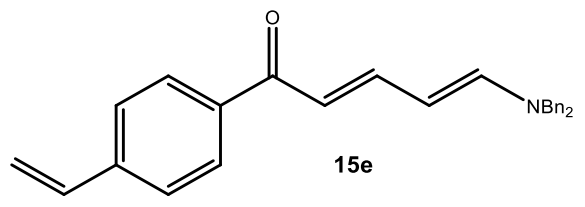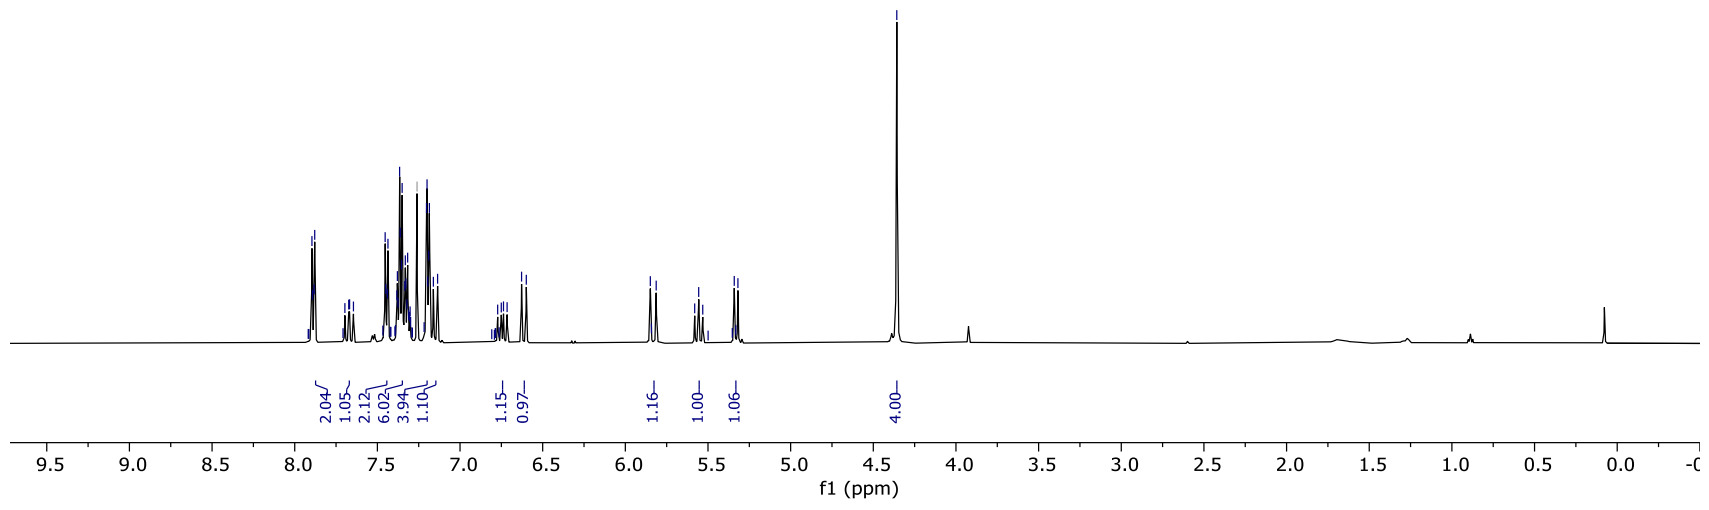

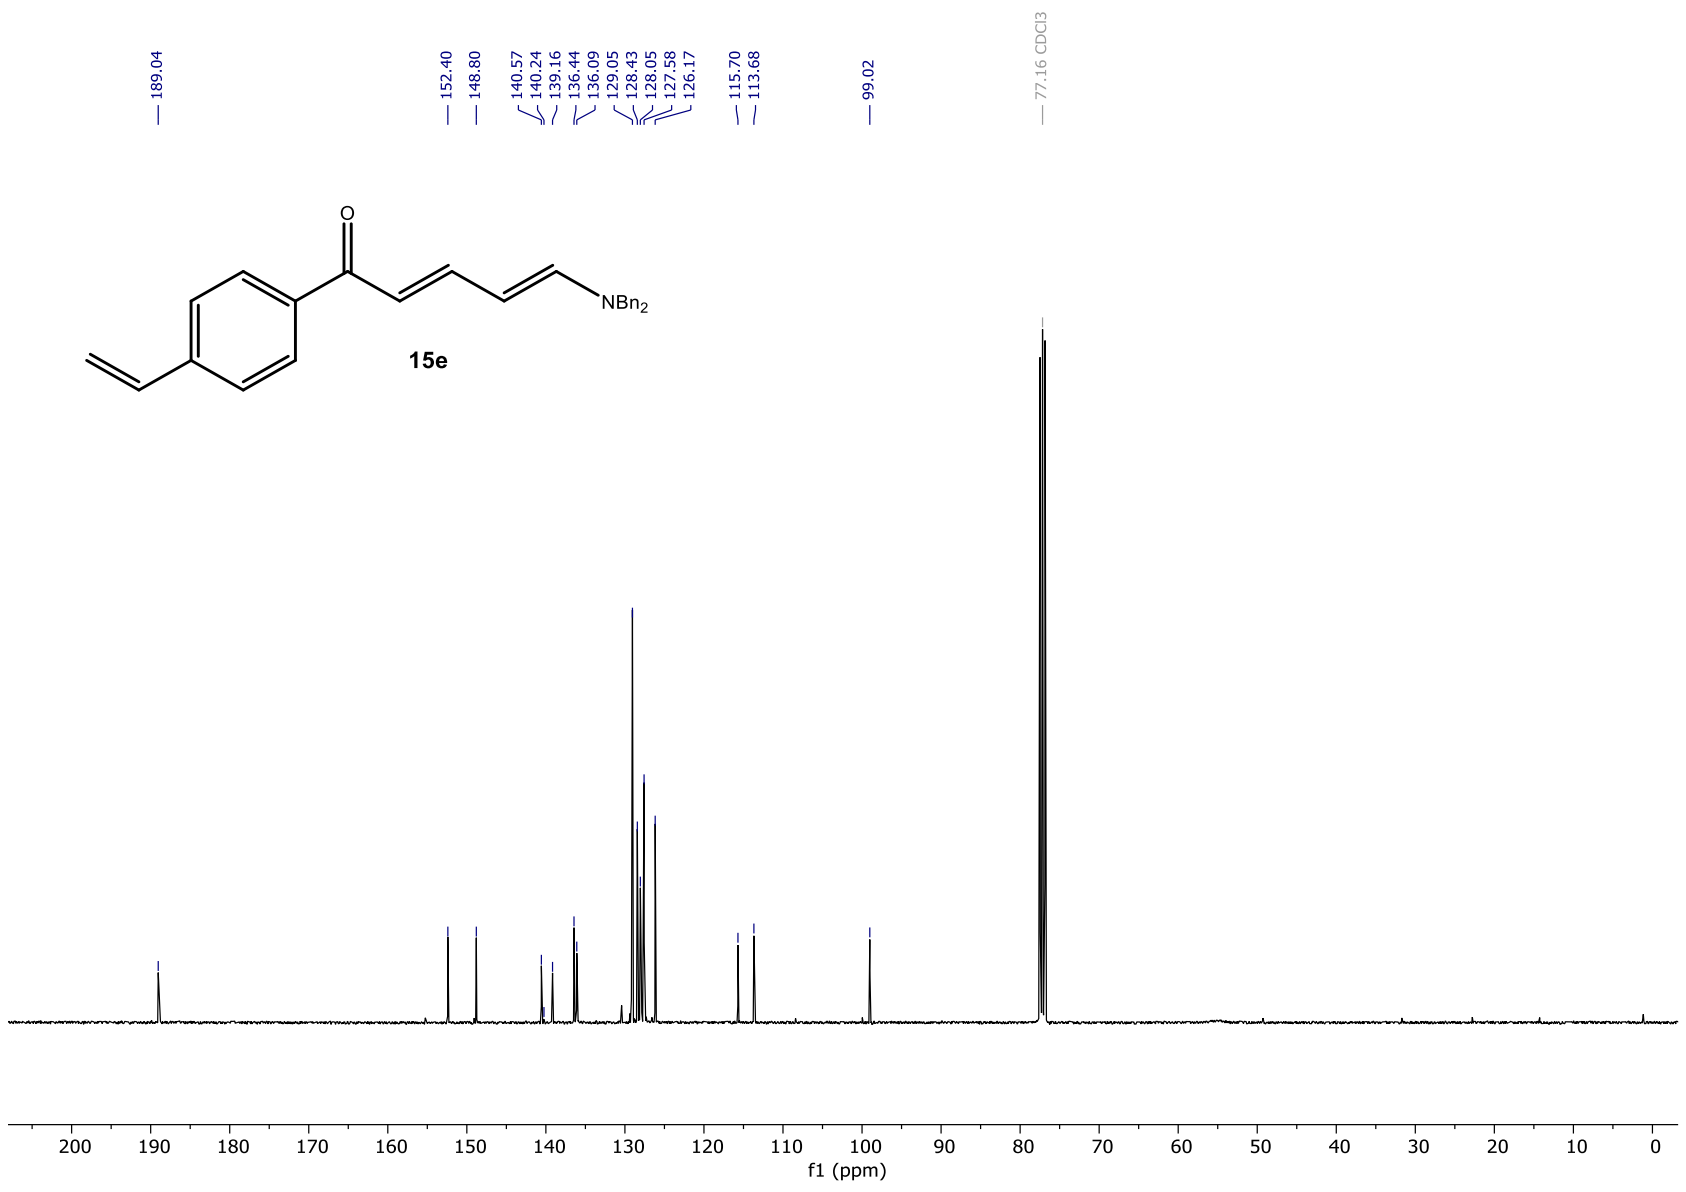

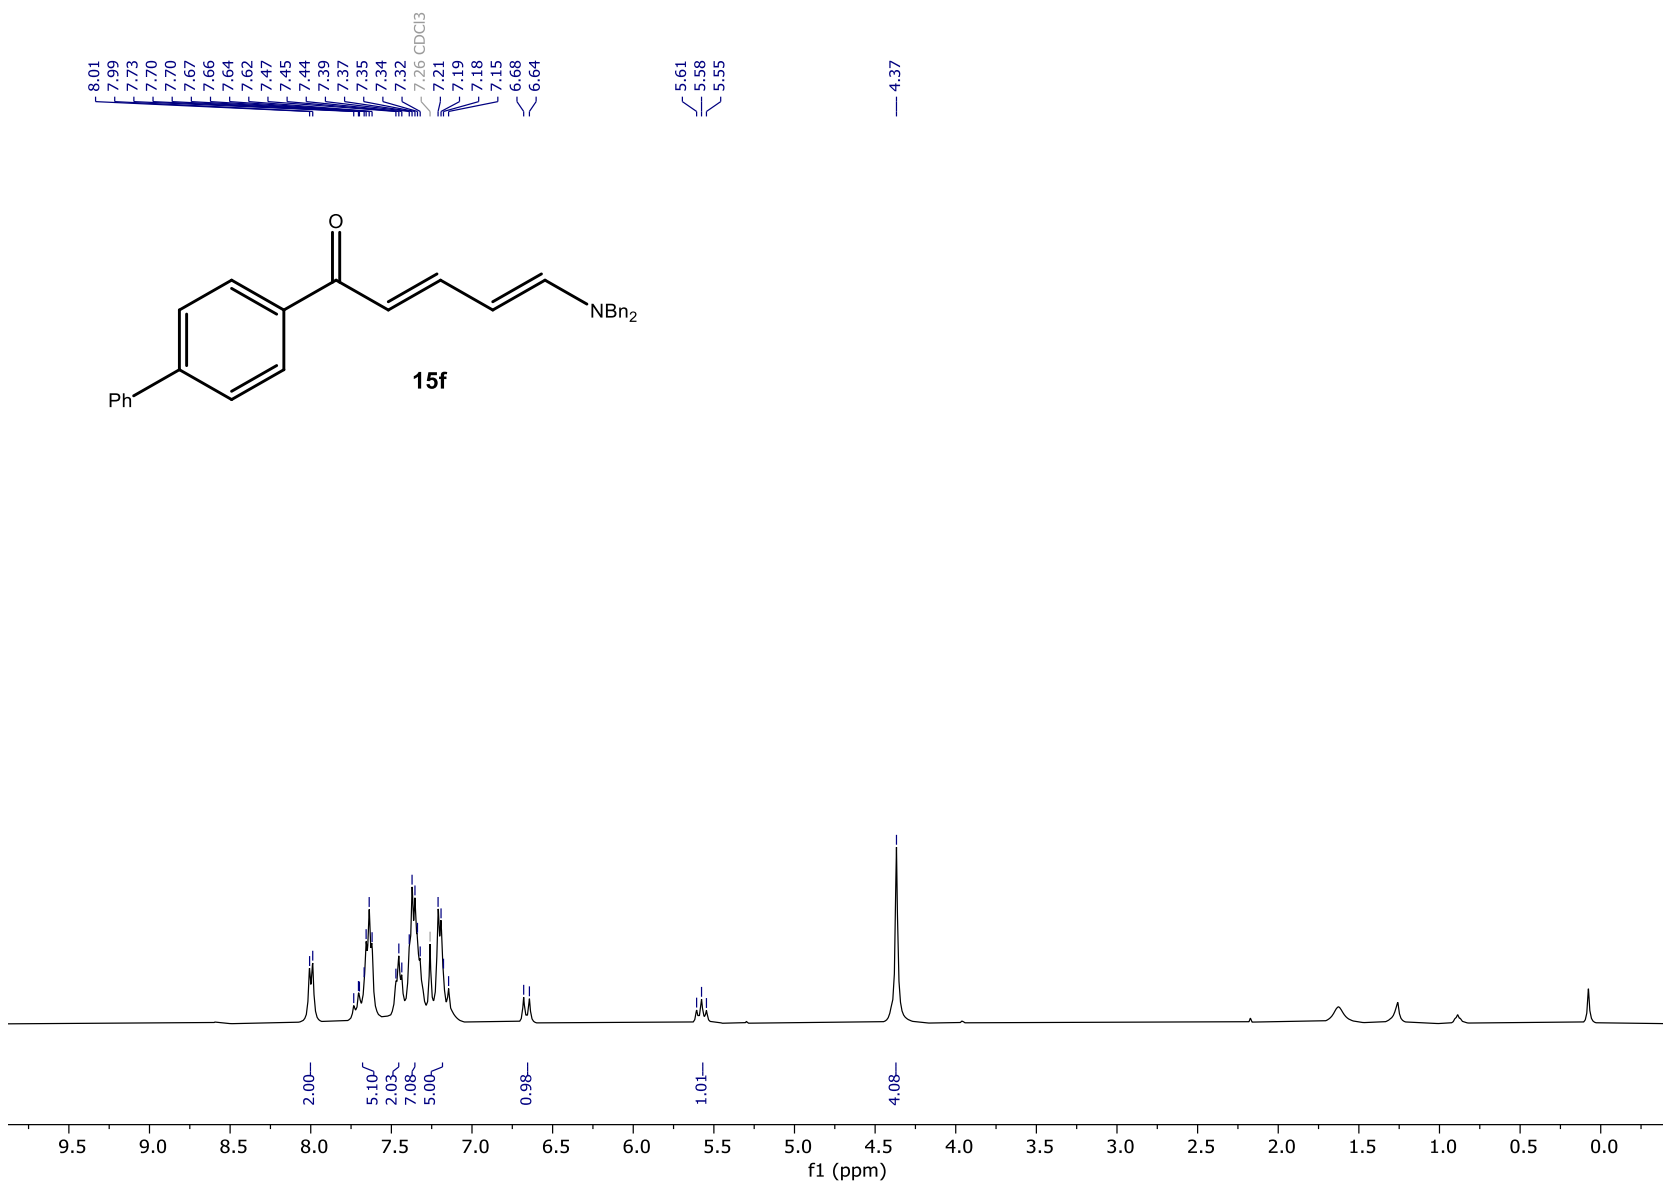

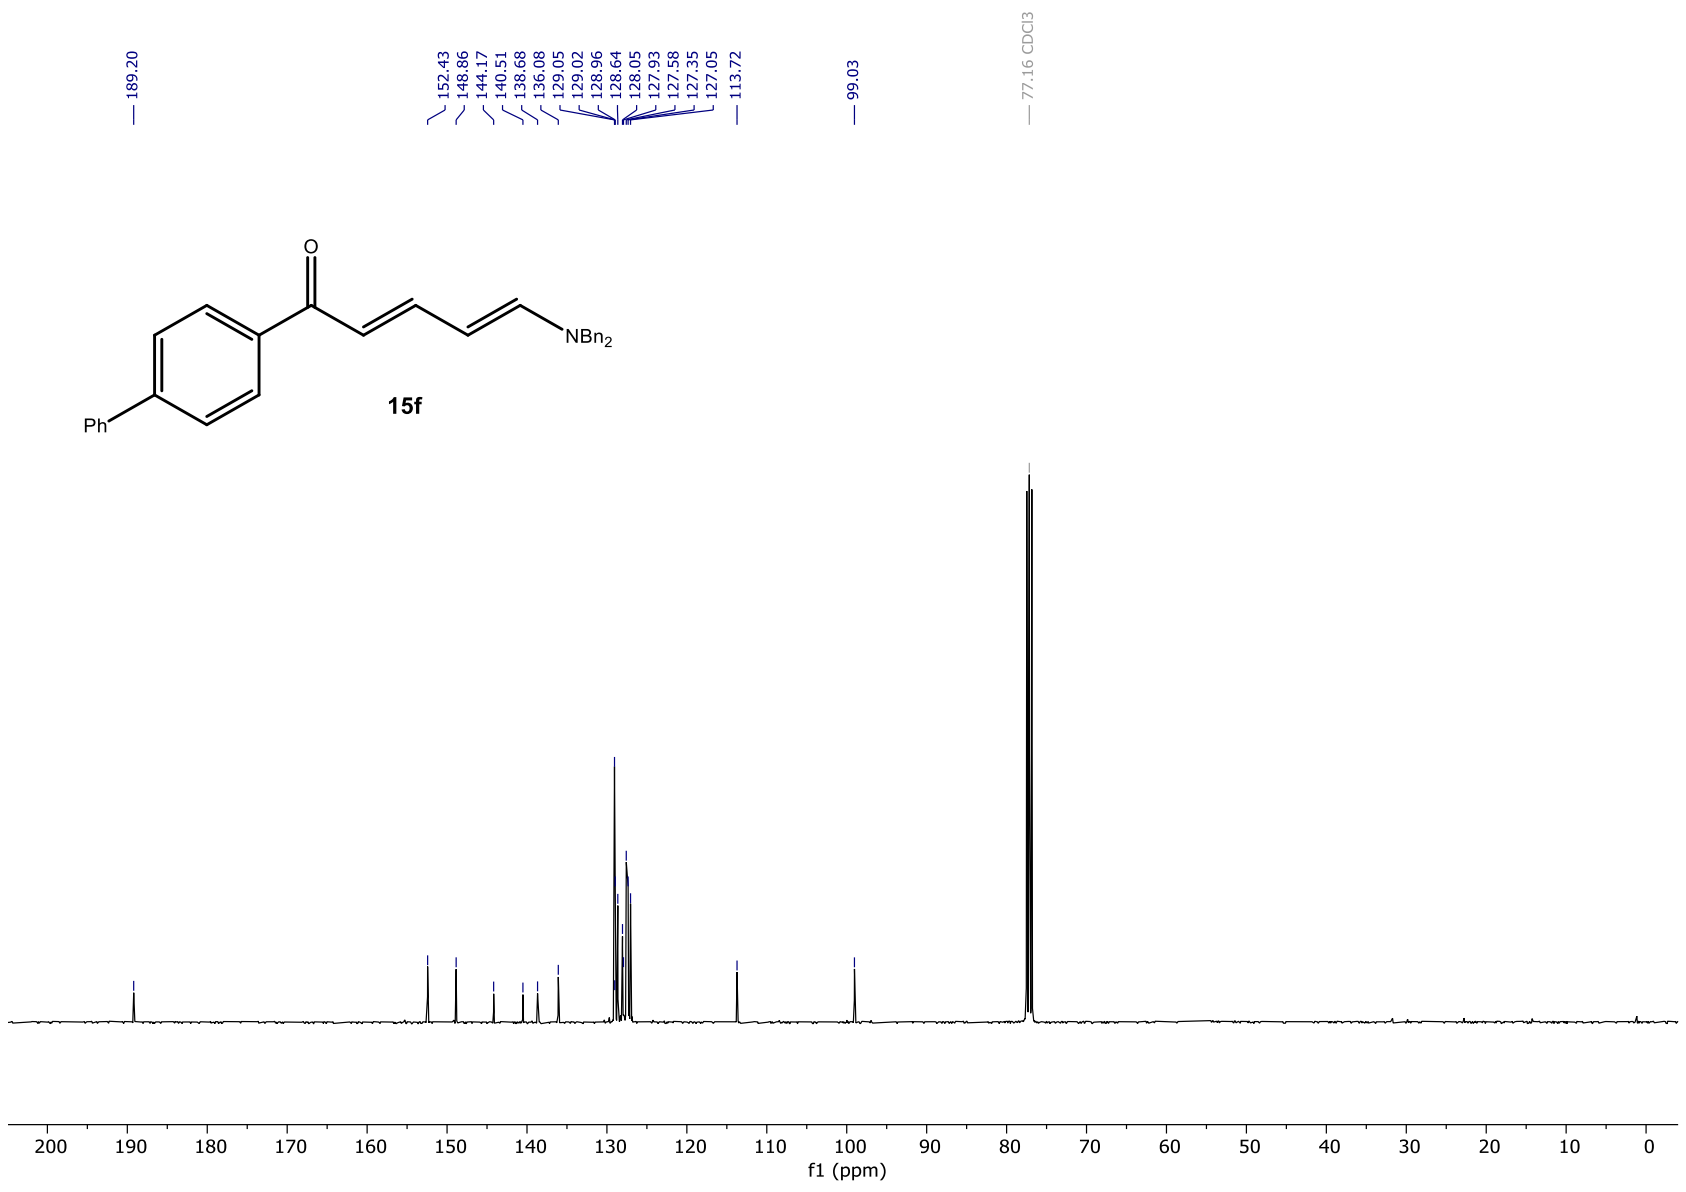

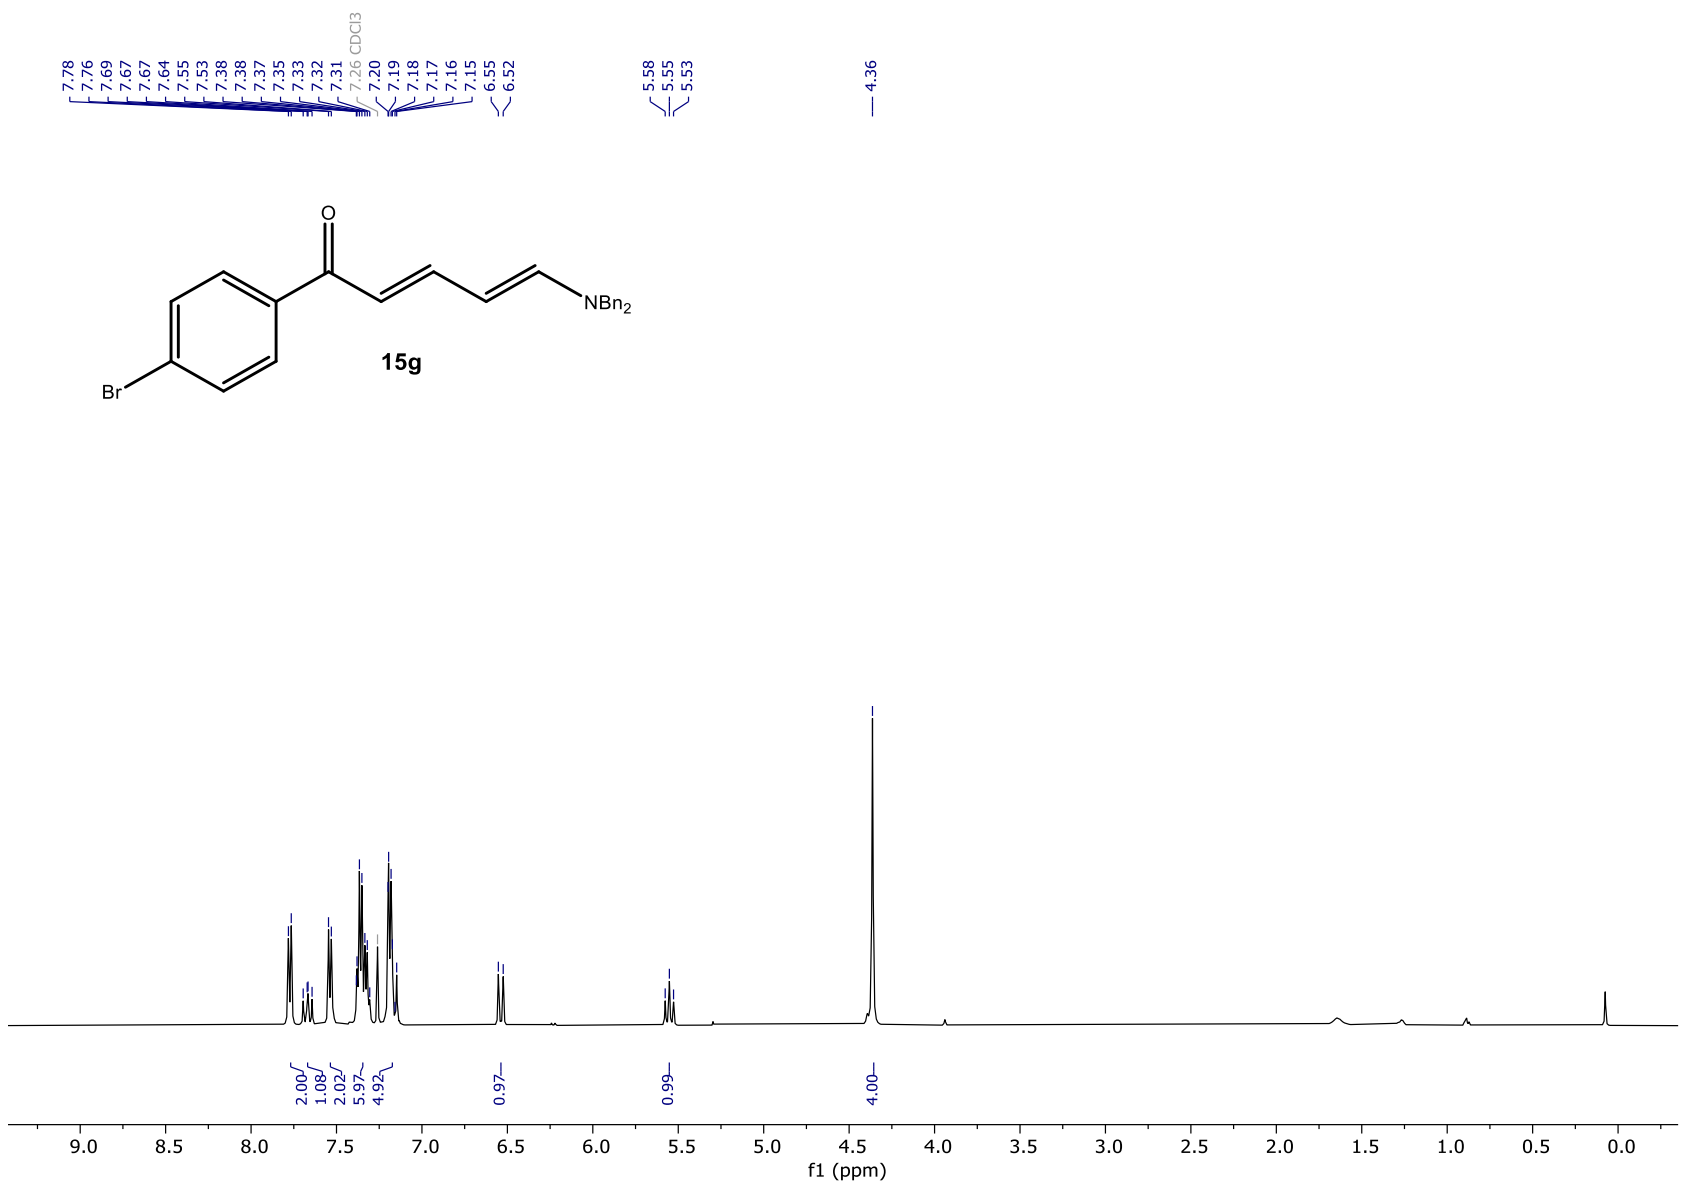

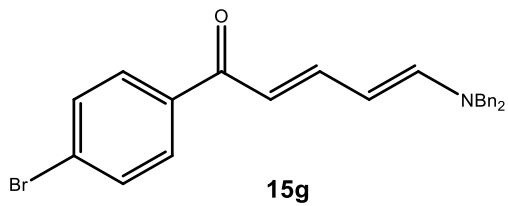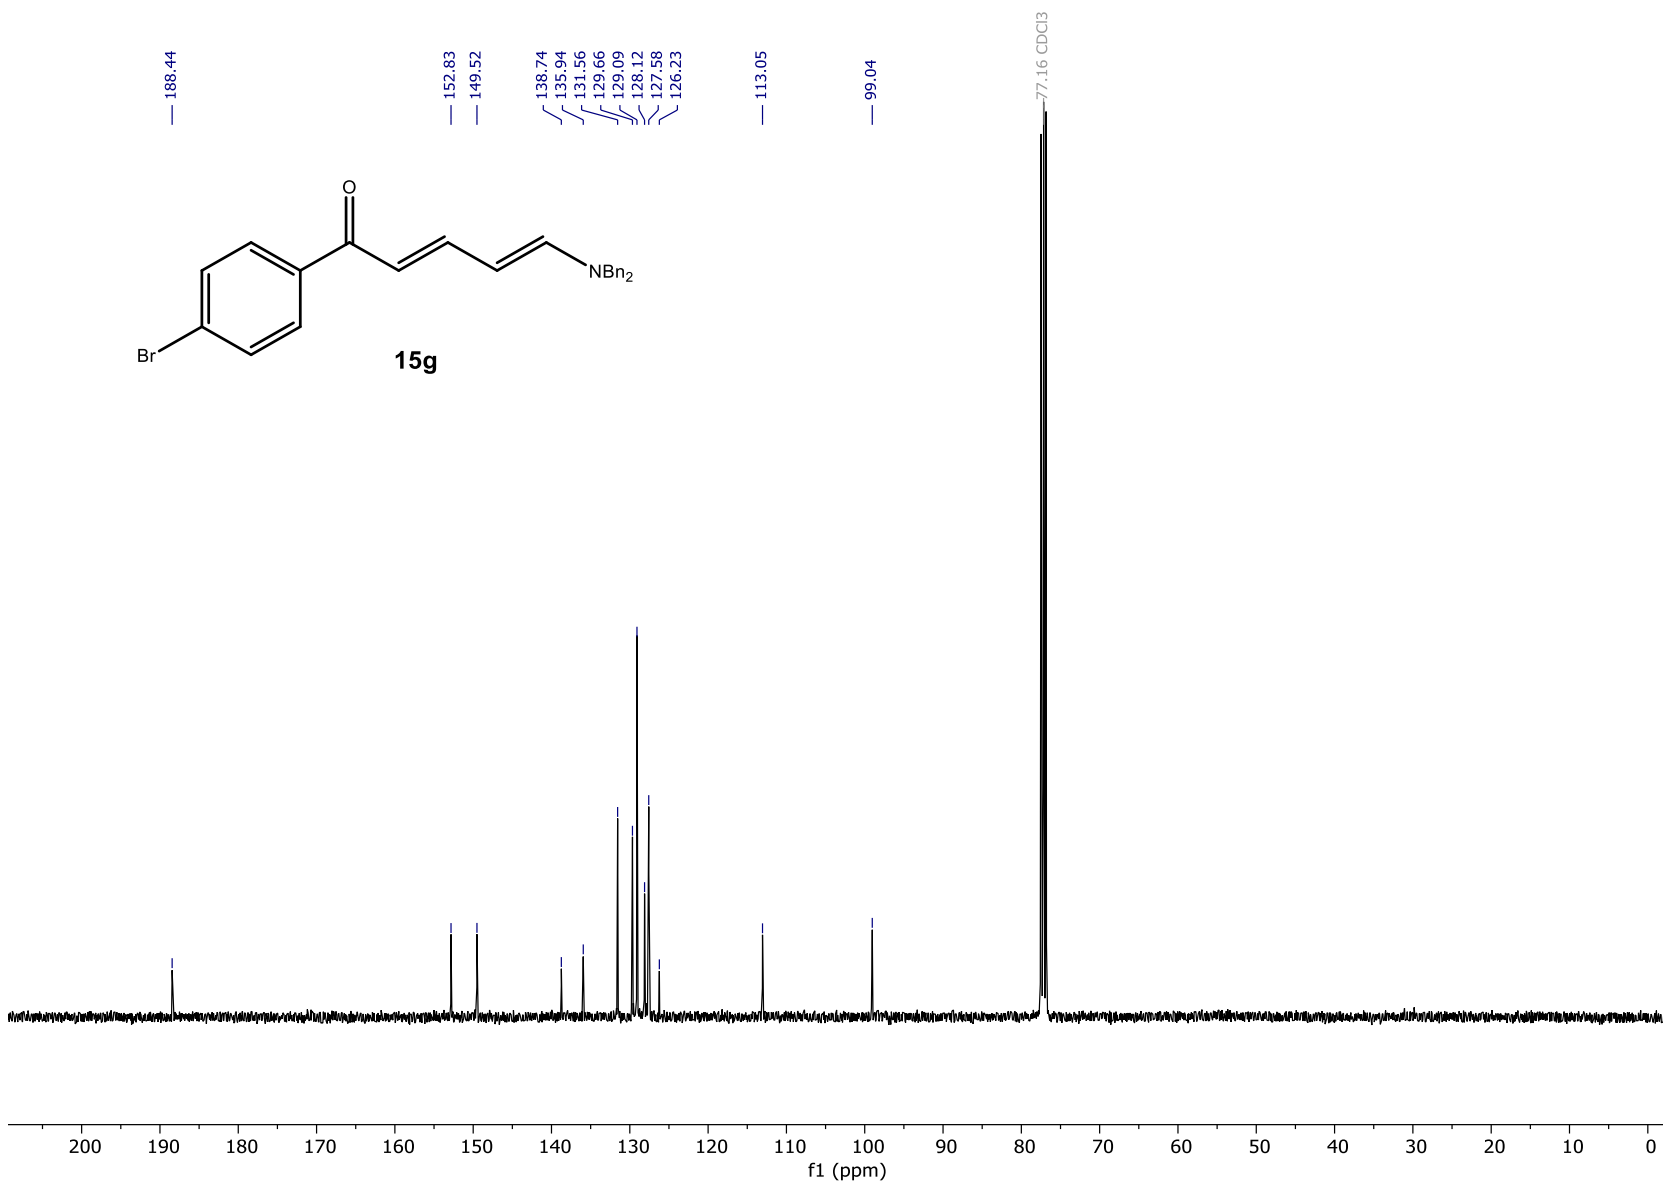

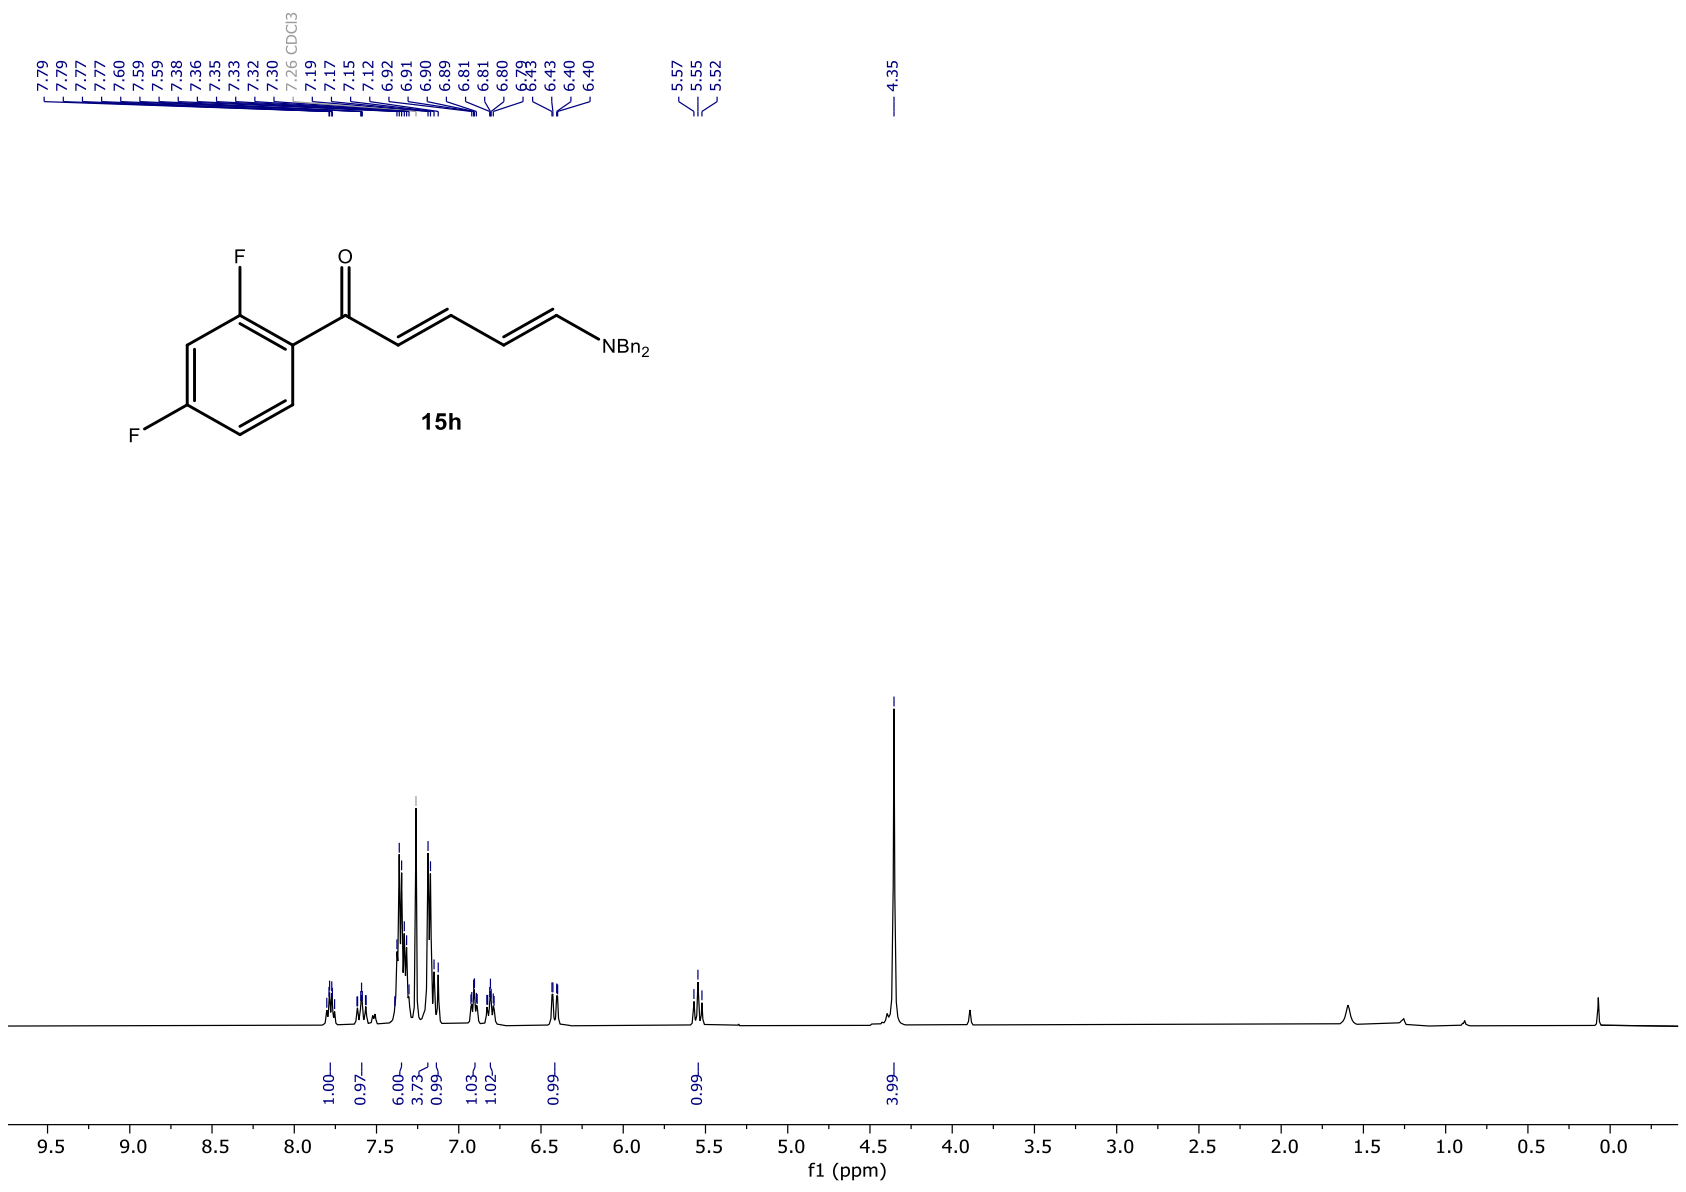

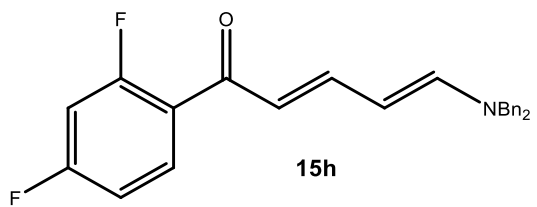

-106.03  
-106.06  
-107.17  
-107.19

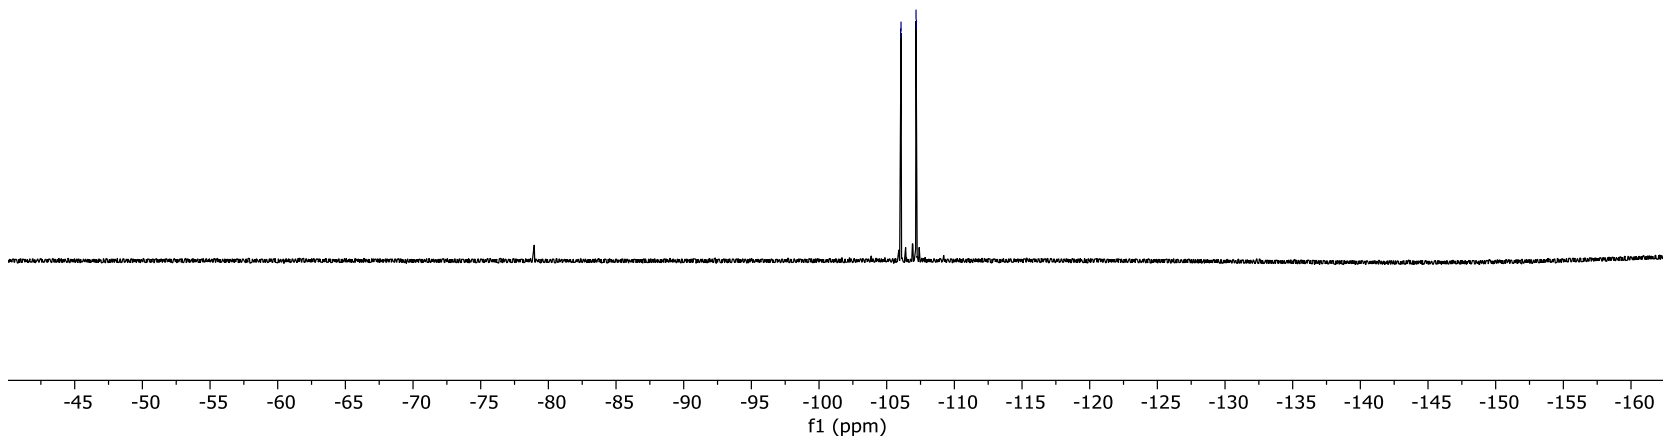

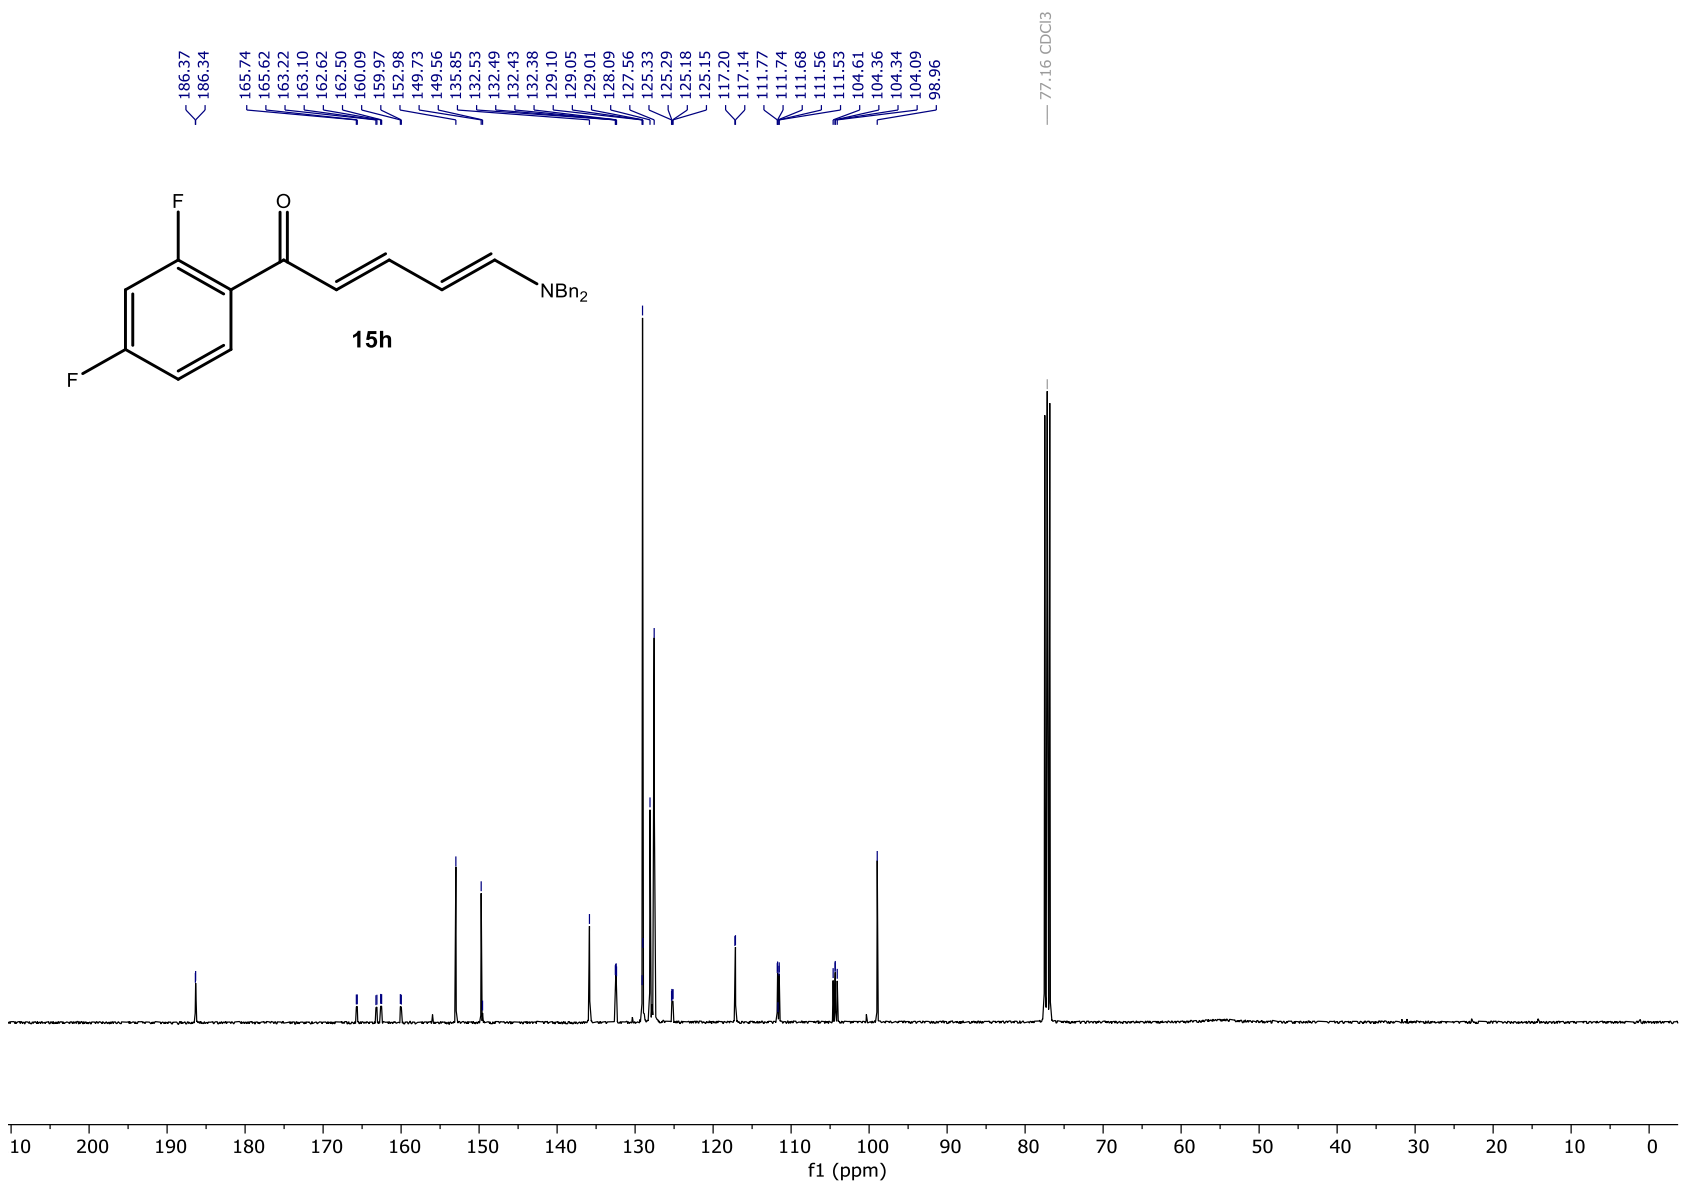

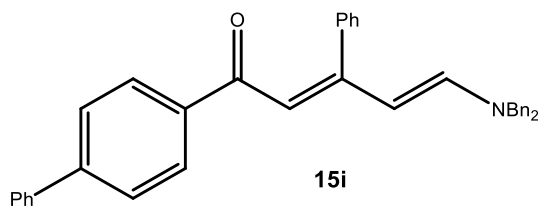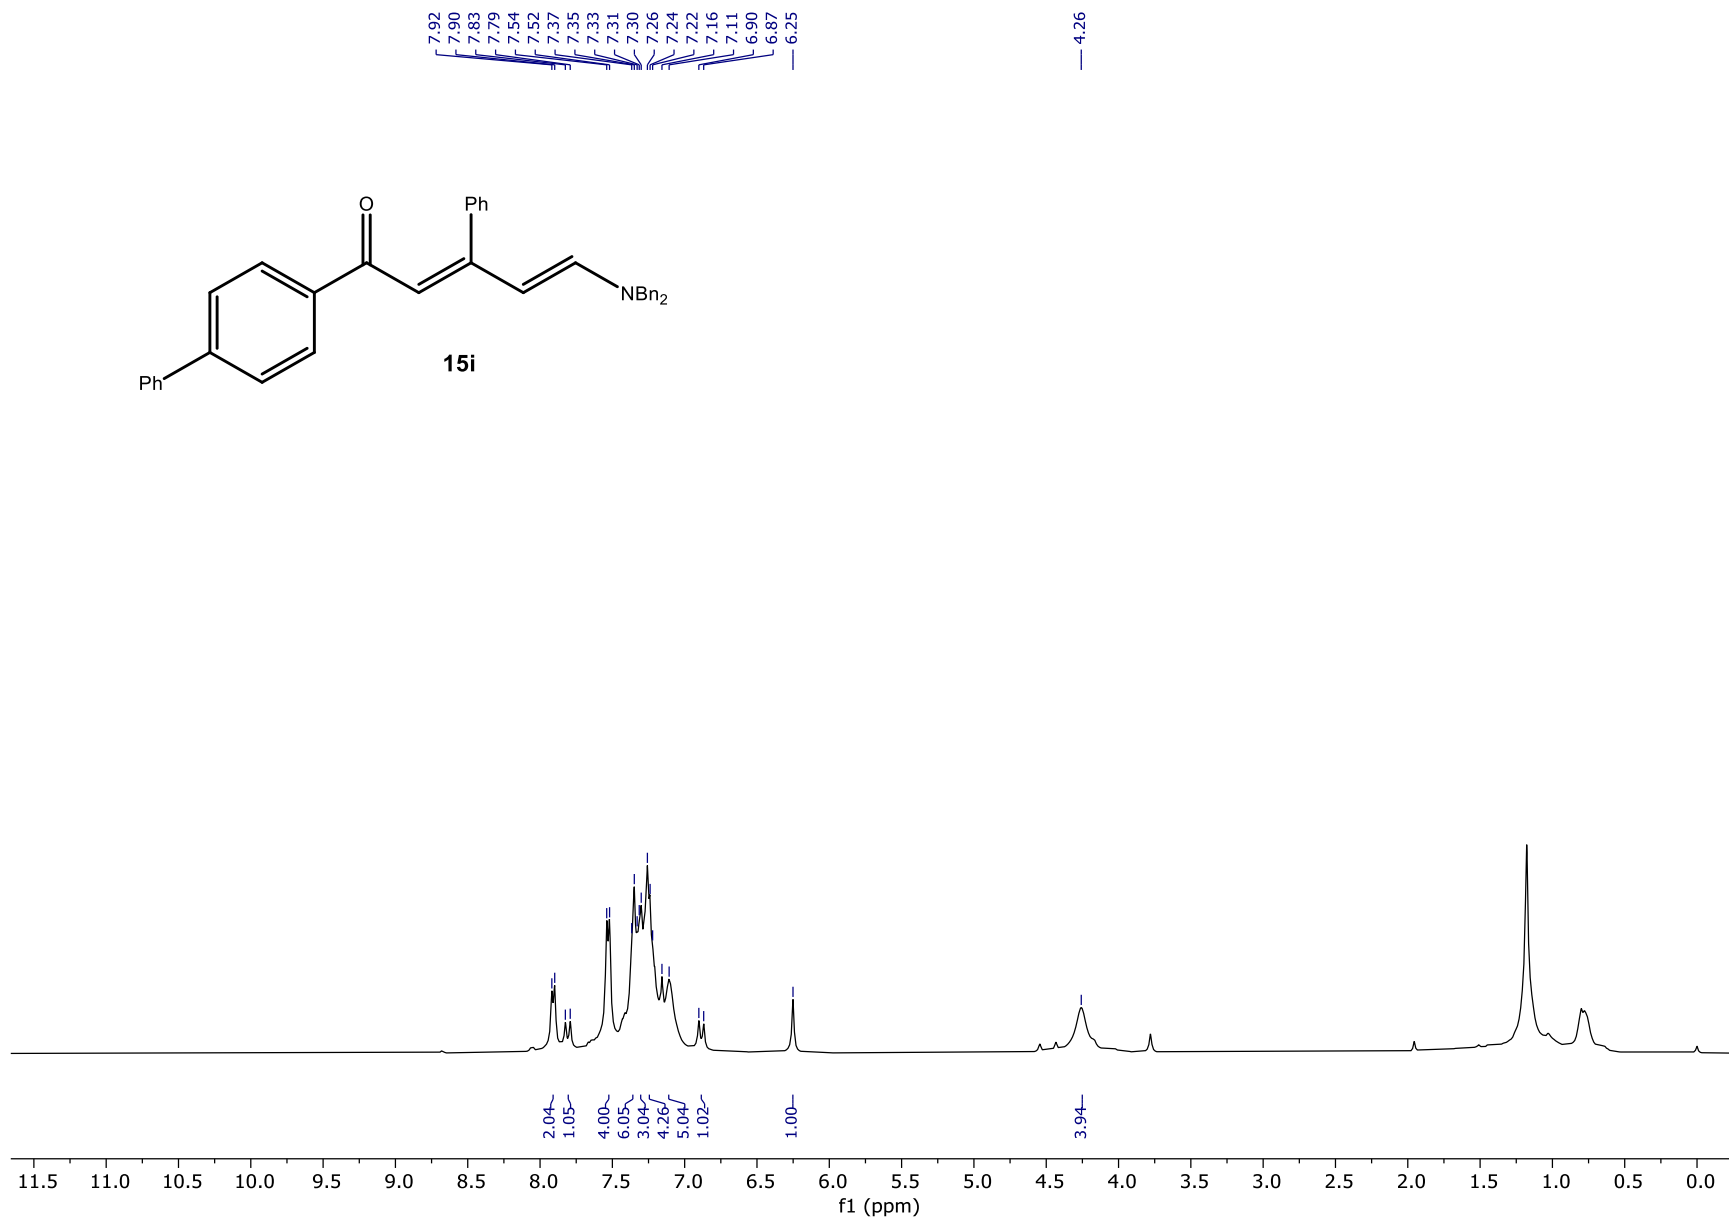

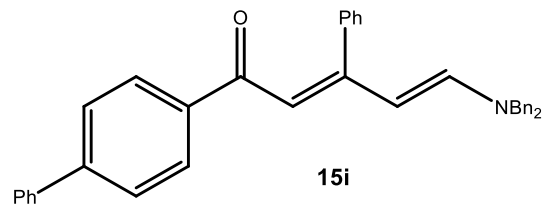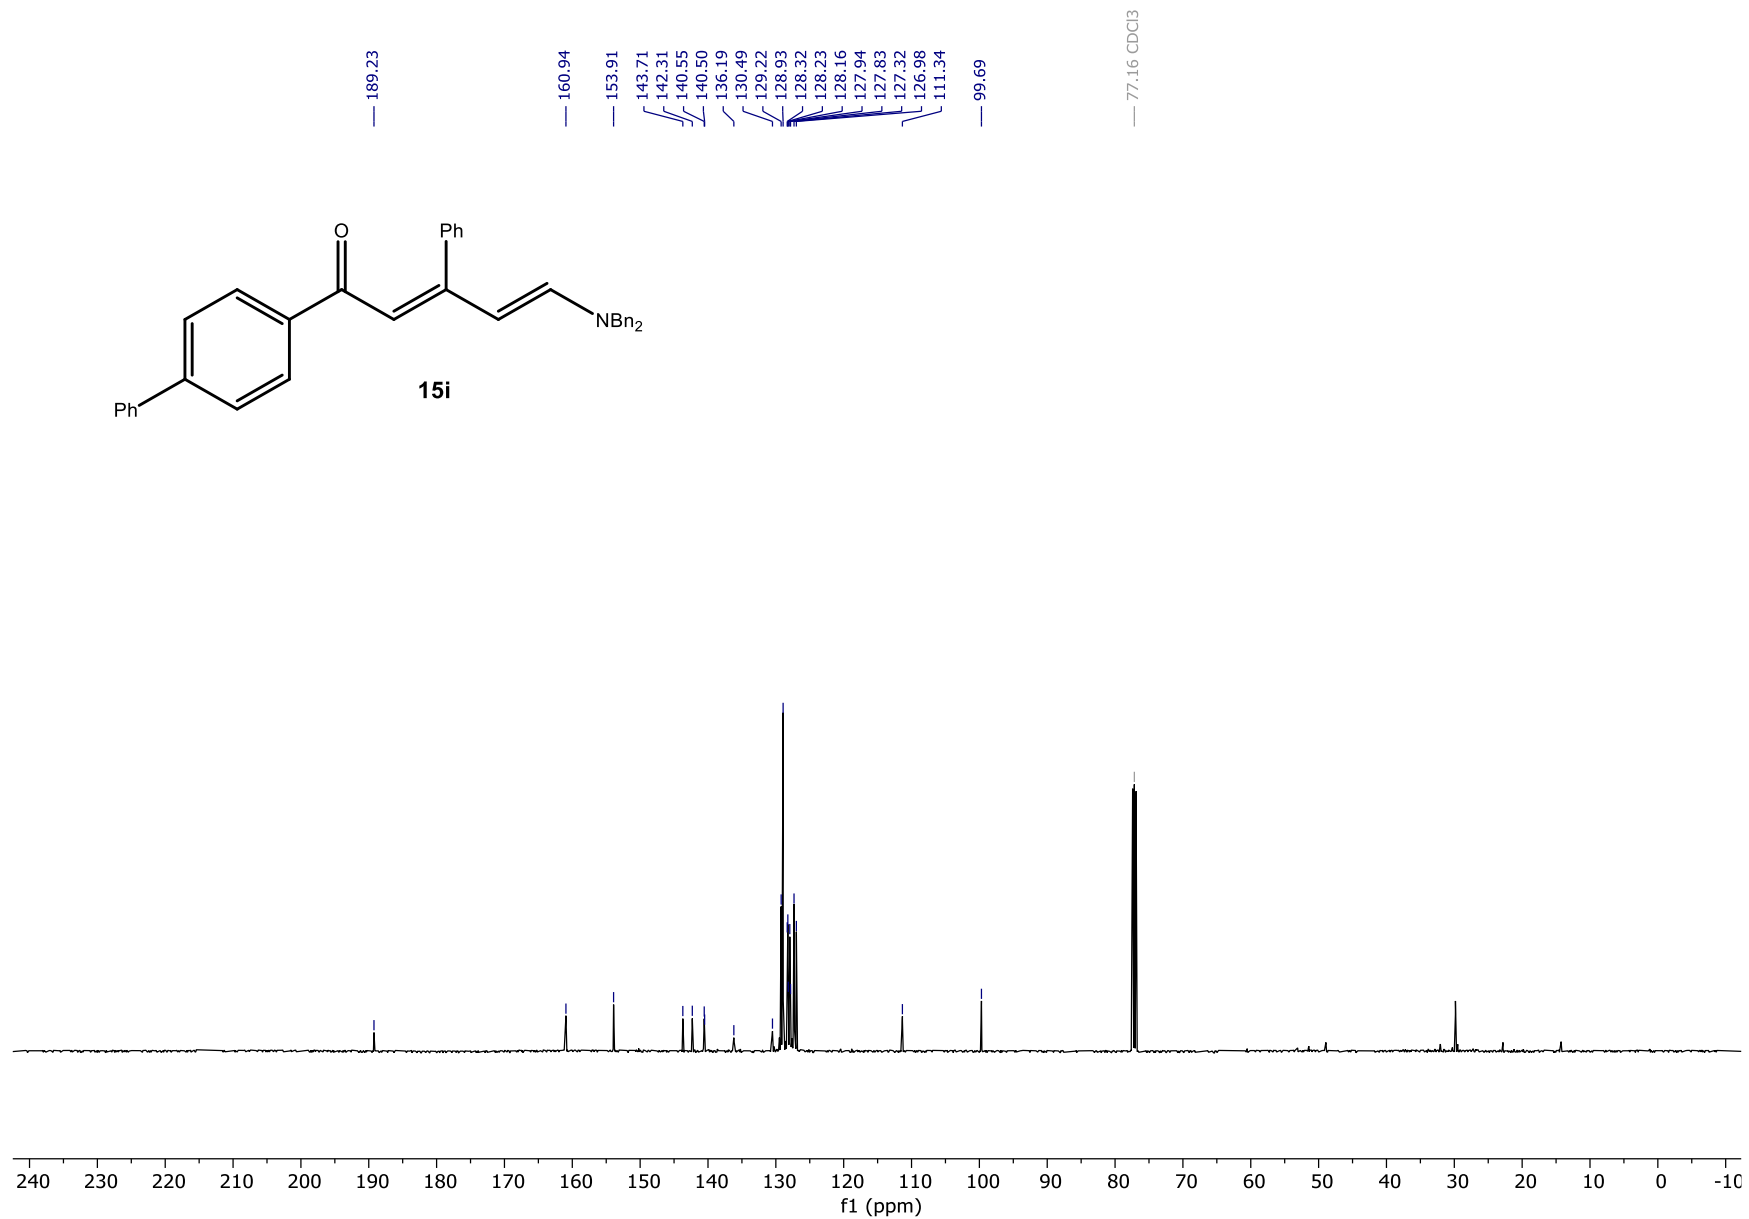

8.43  
8.43  
8.07  
8.06  
7.96  
7.93  
7.92  
7.90  
7.89  
7.88  
7.87  
7.86  
7.85  
7.85  
7.84  
7.83  
7.53  
7.52  
7.52  
7.52  
7.51  
7.50  
7.50  
7.49  
7.48  
7.48  
7.48  
7.47  
7.47  
7.43  
7.43  
7.42  
7.42  
7.41  
7.38  
7.37  
7.36  
7.36  
7.35  
7.34  
7.33  
7.32  
7.32  
7.26 CDCl3  
7.24  
7.22  
7.21  
7.20  
7.18  
7.01  
6.98  
6.47  
4.36

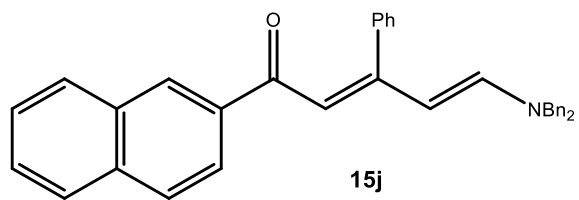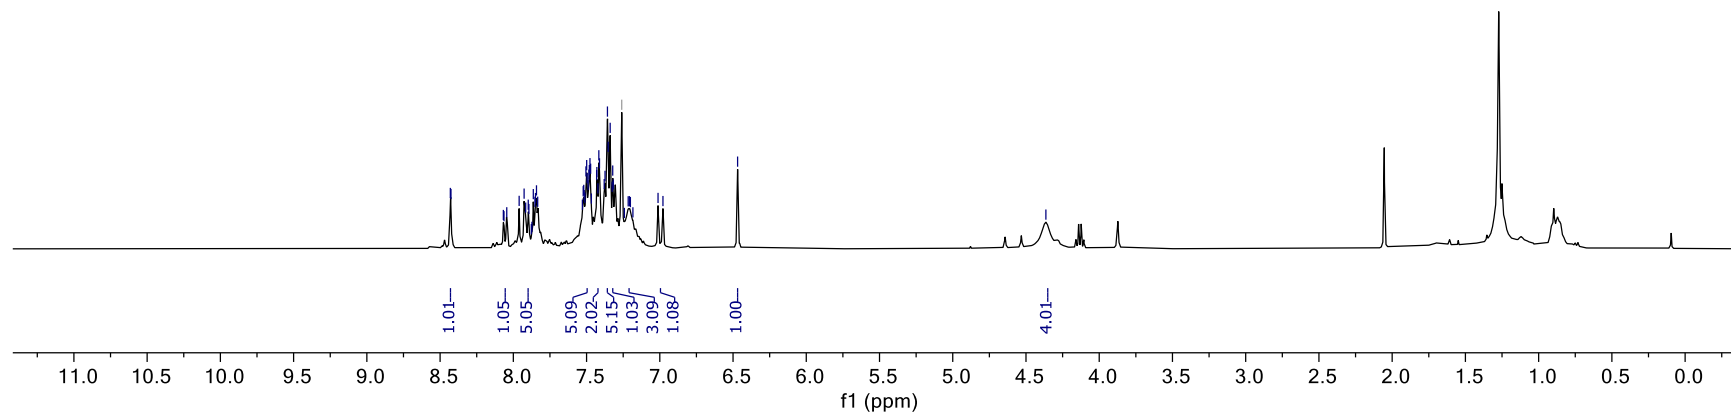

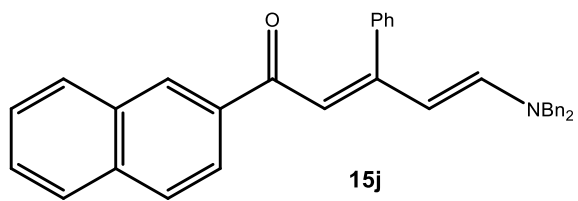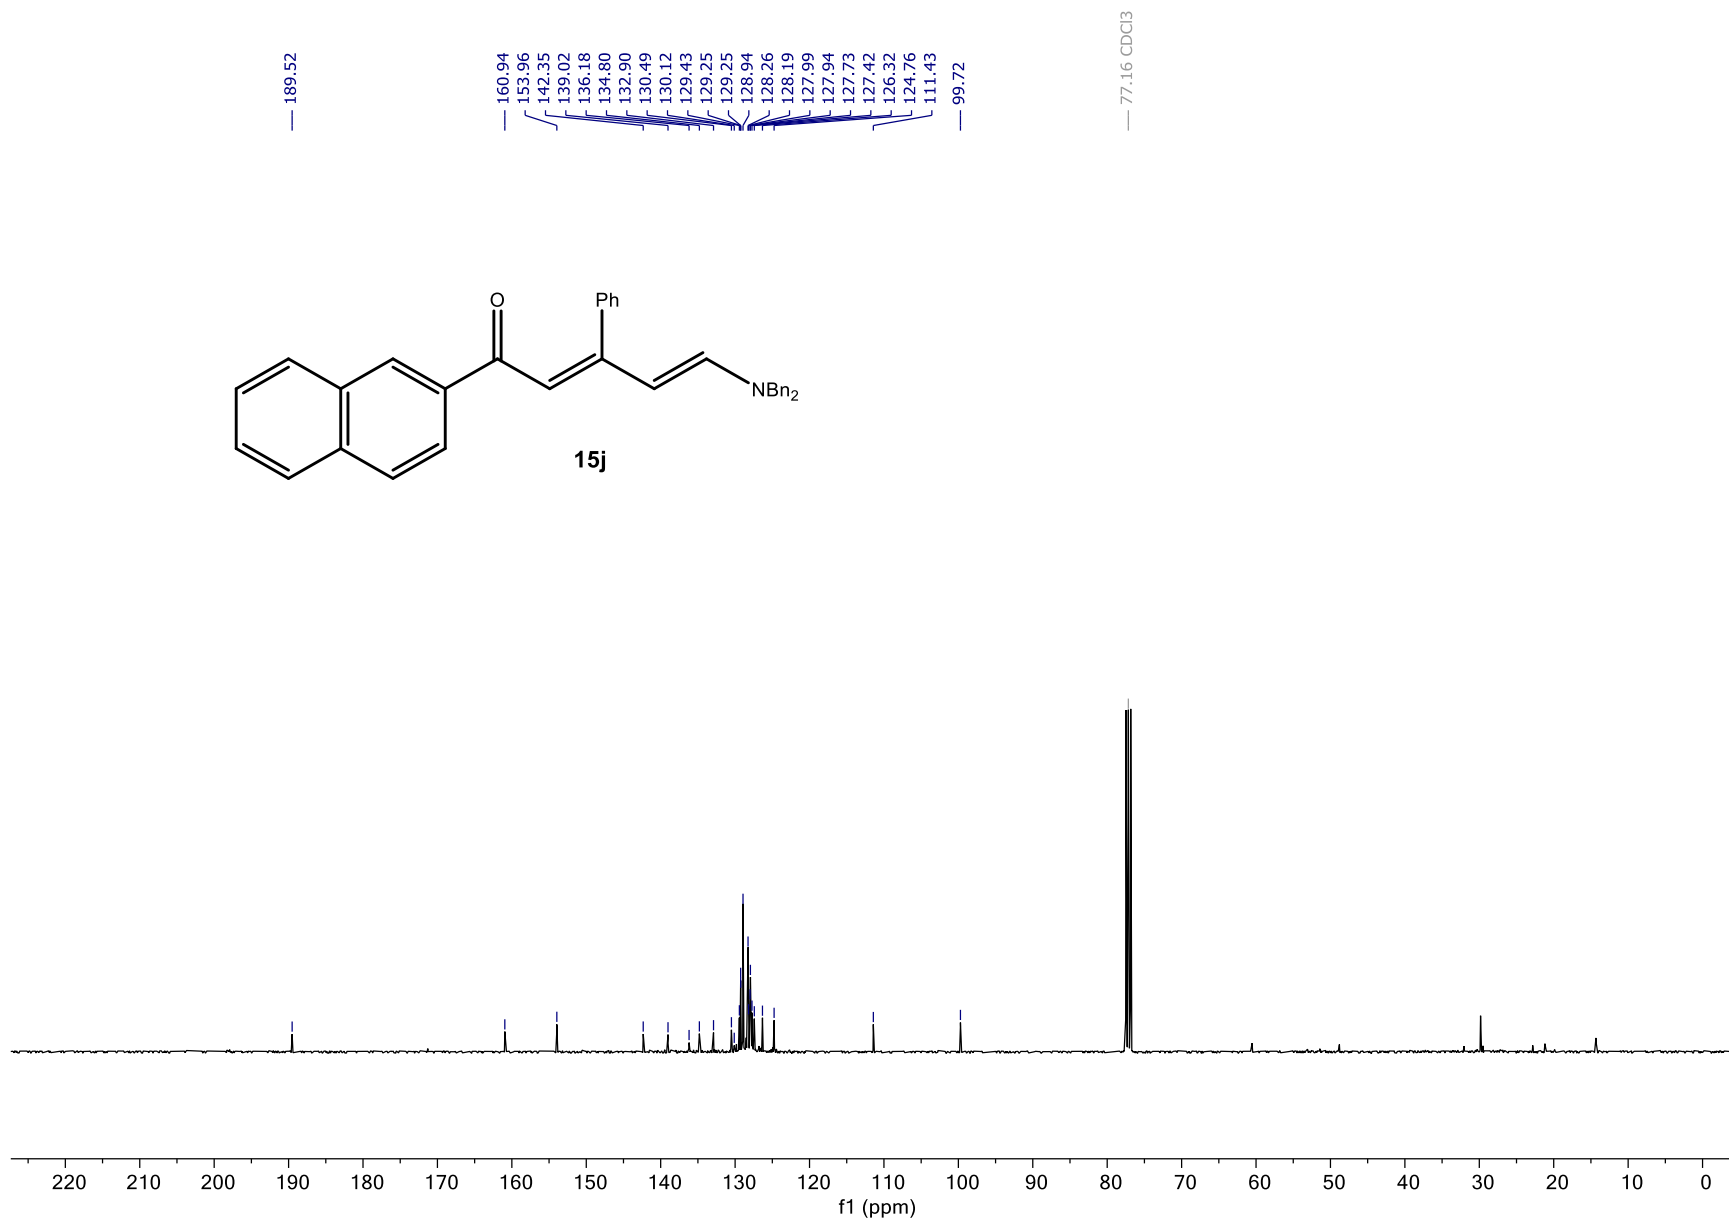

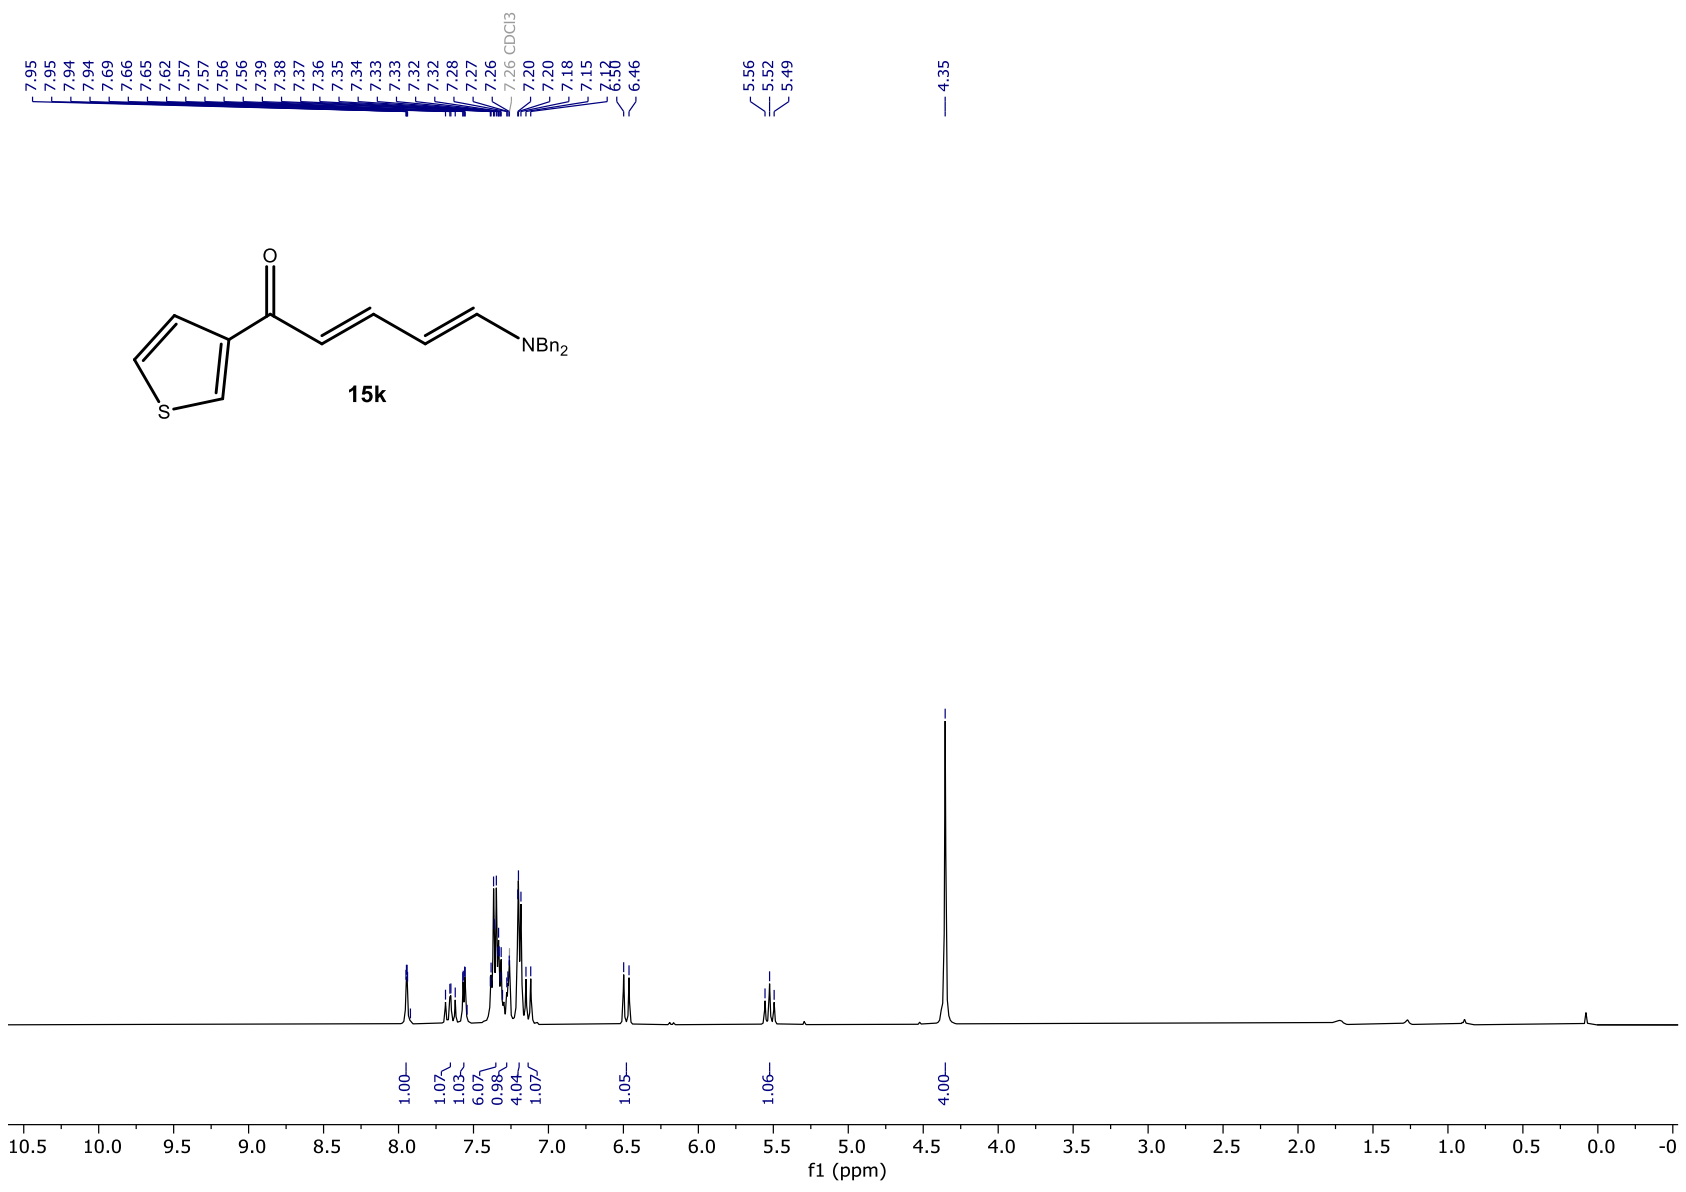

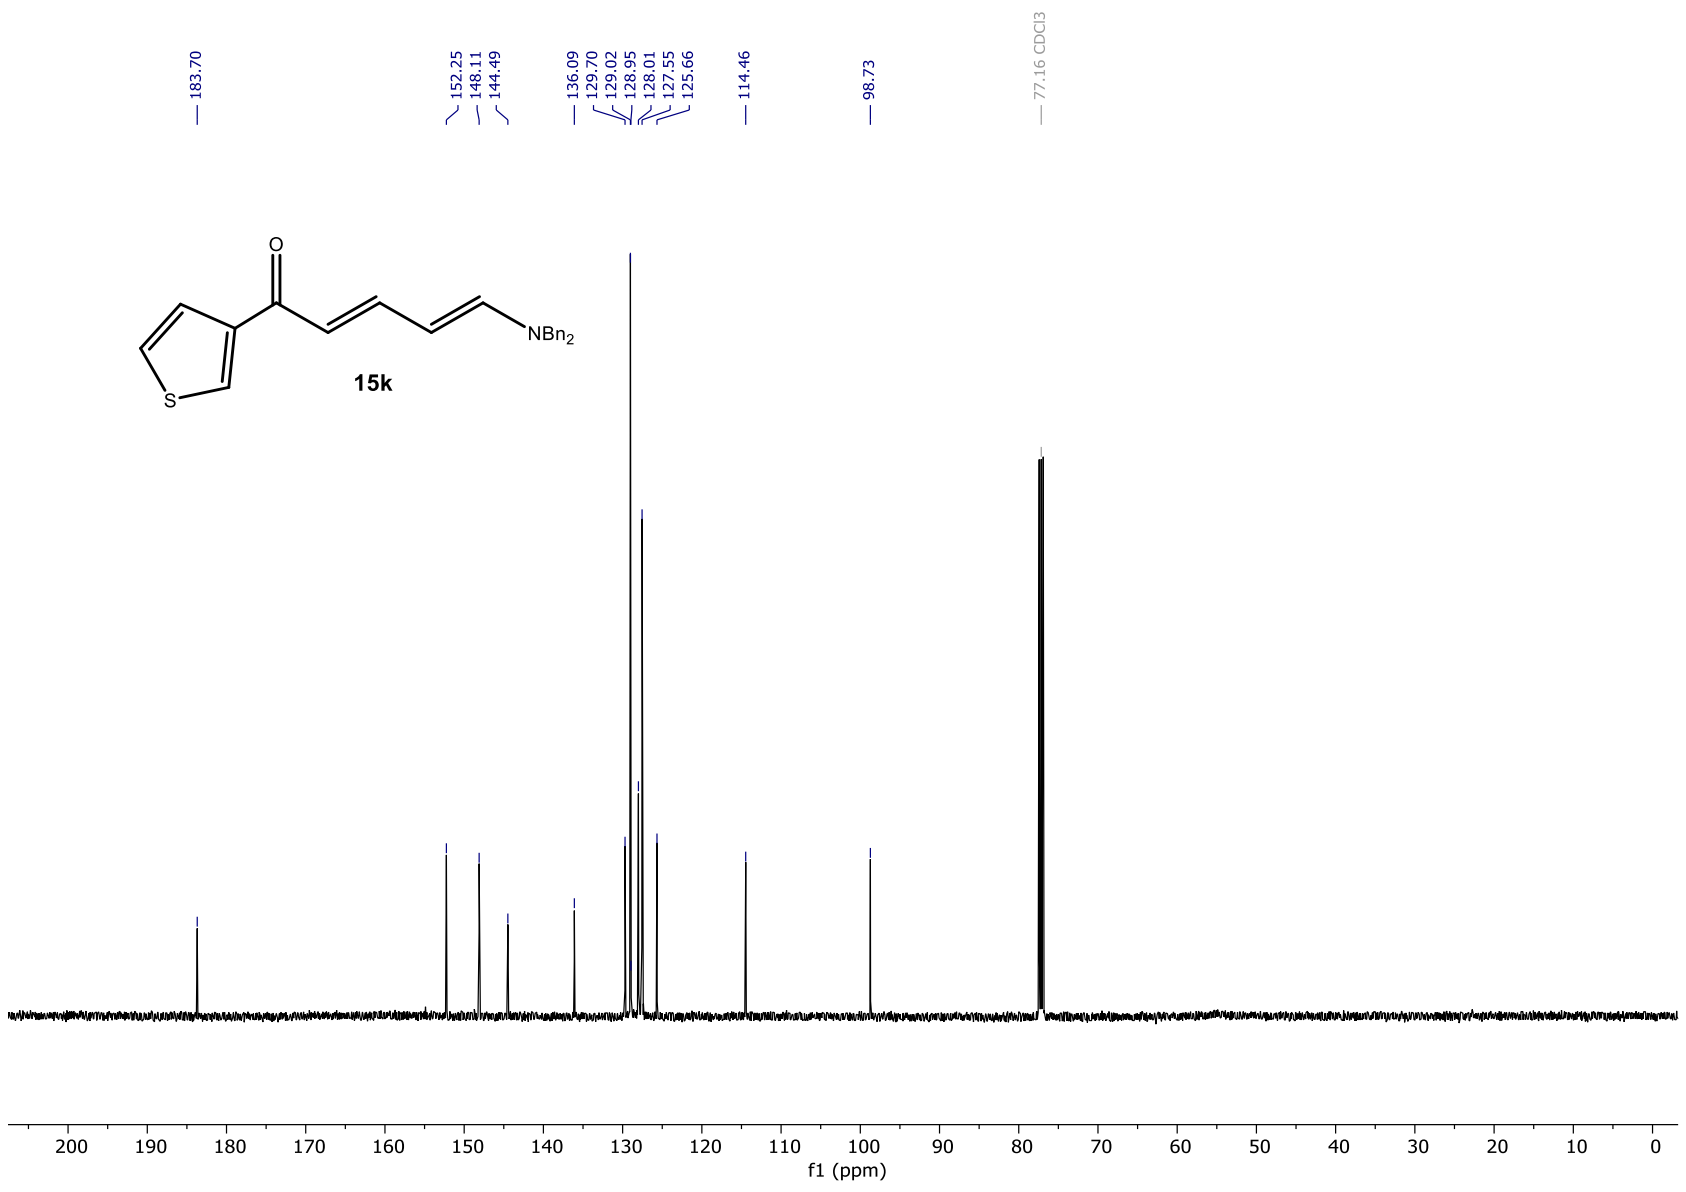

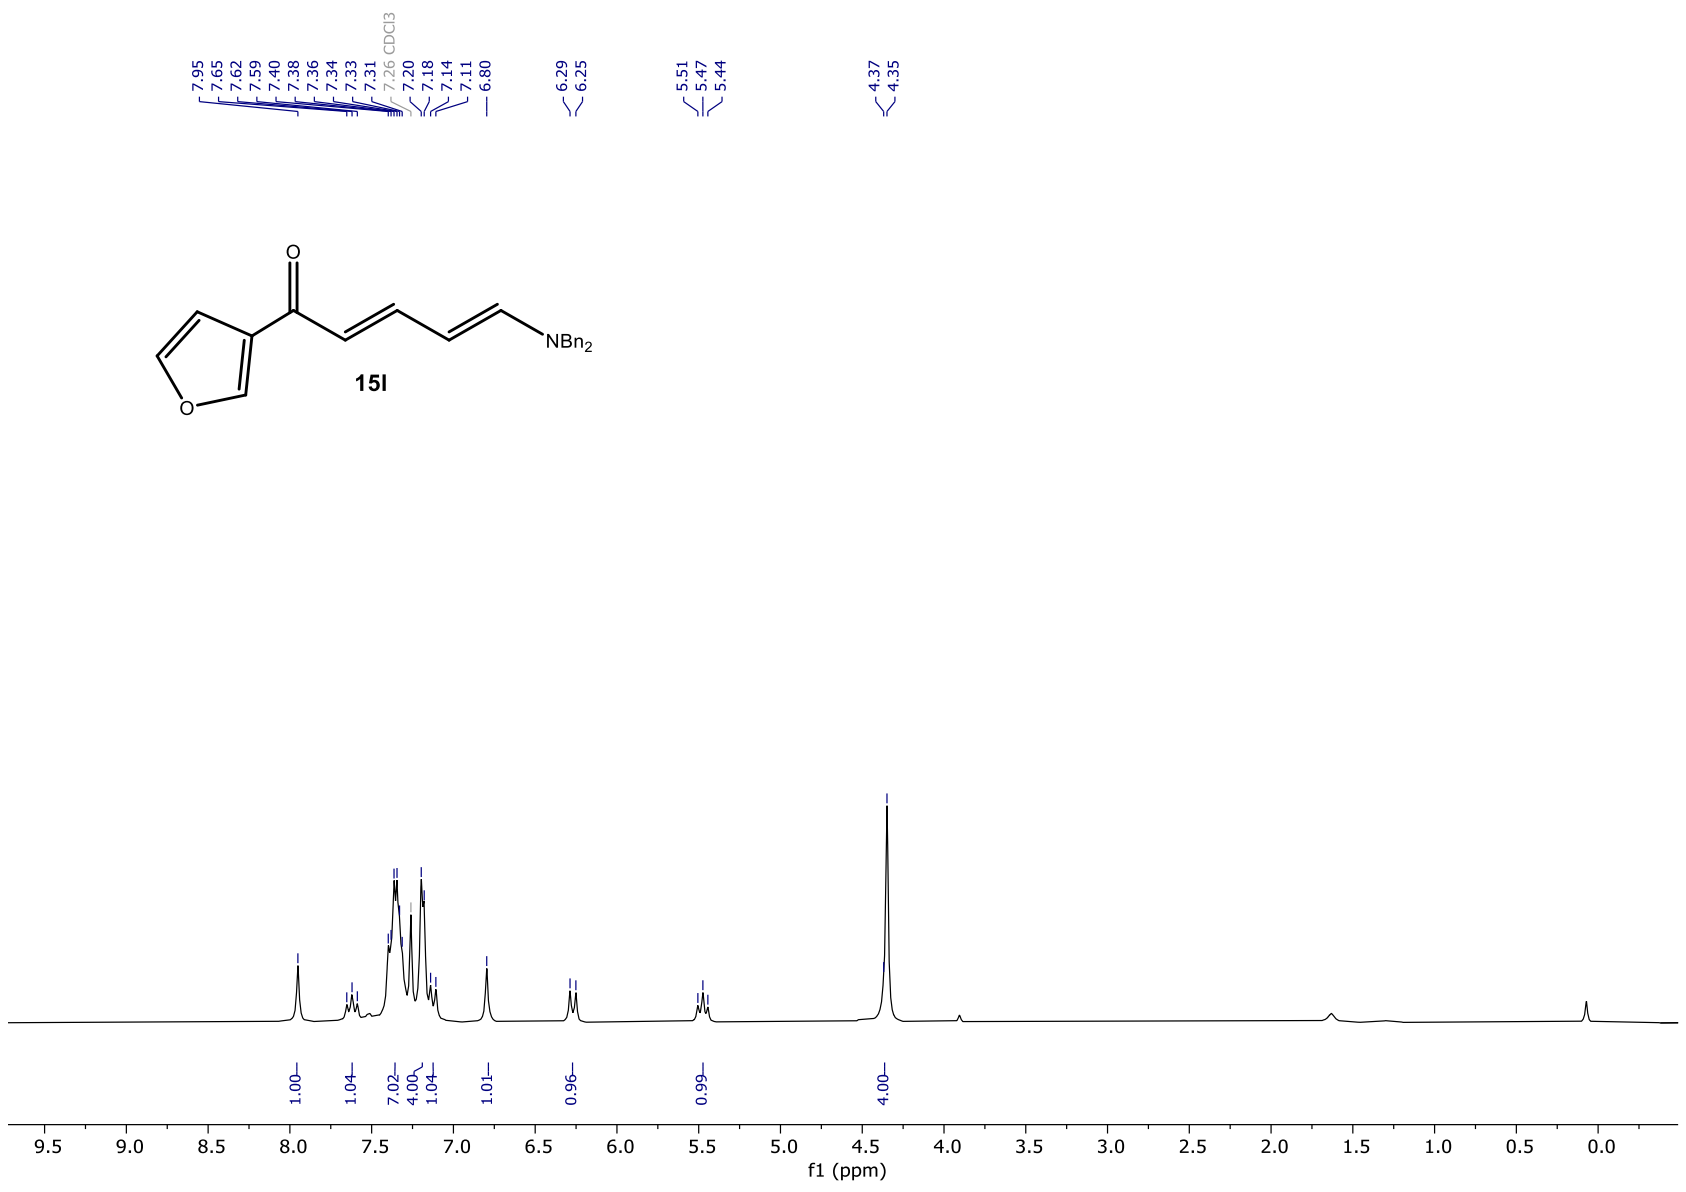

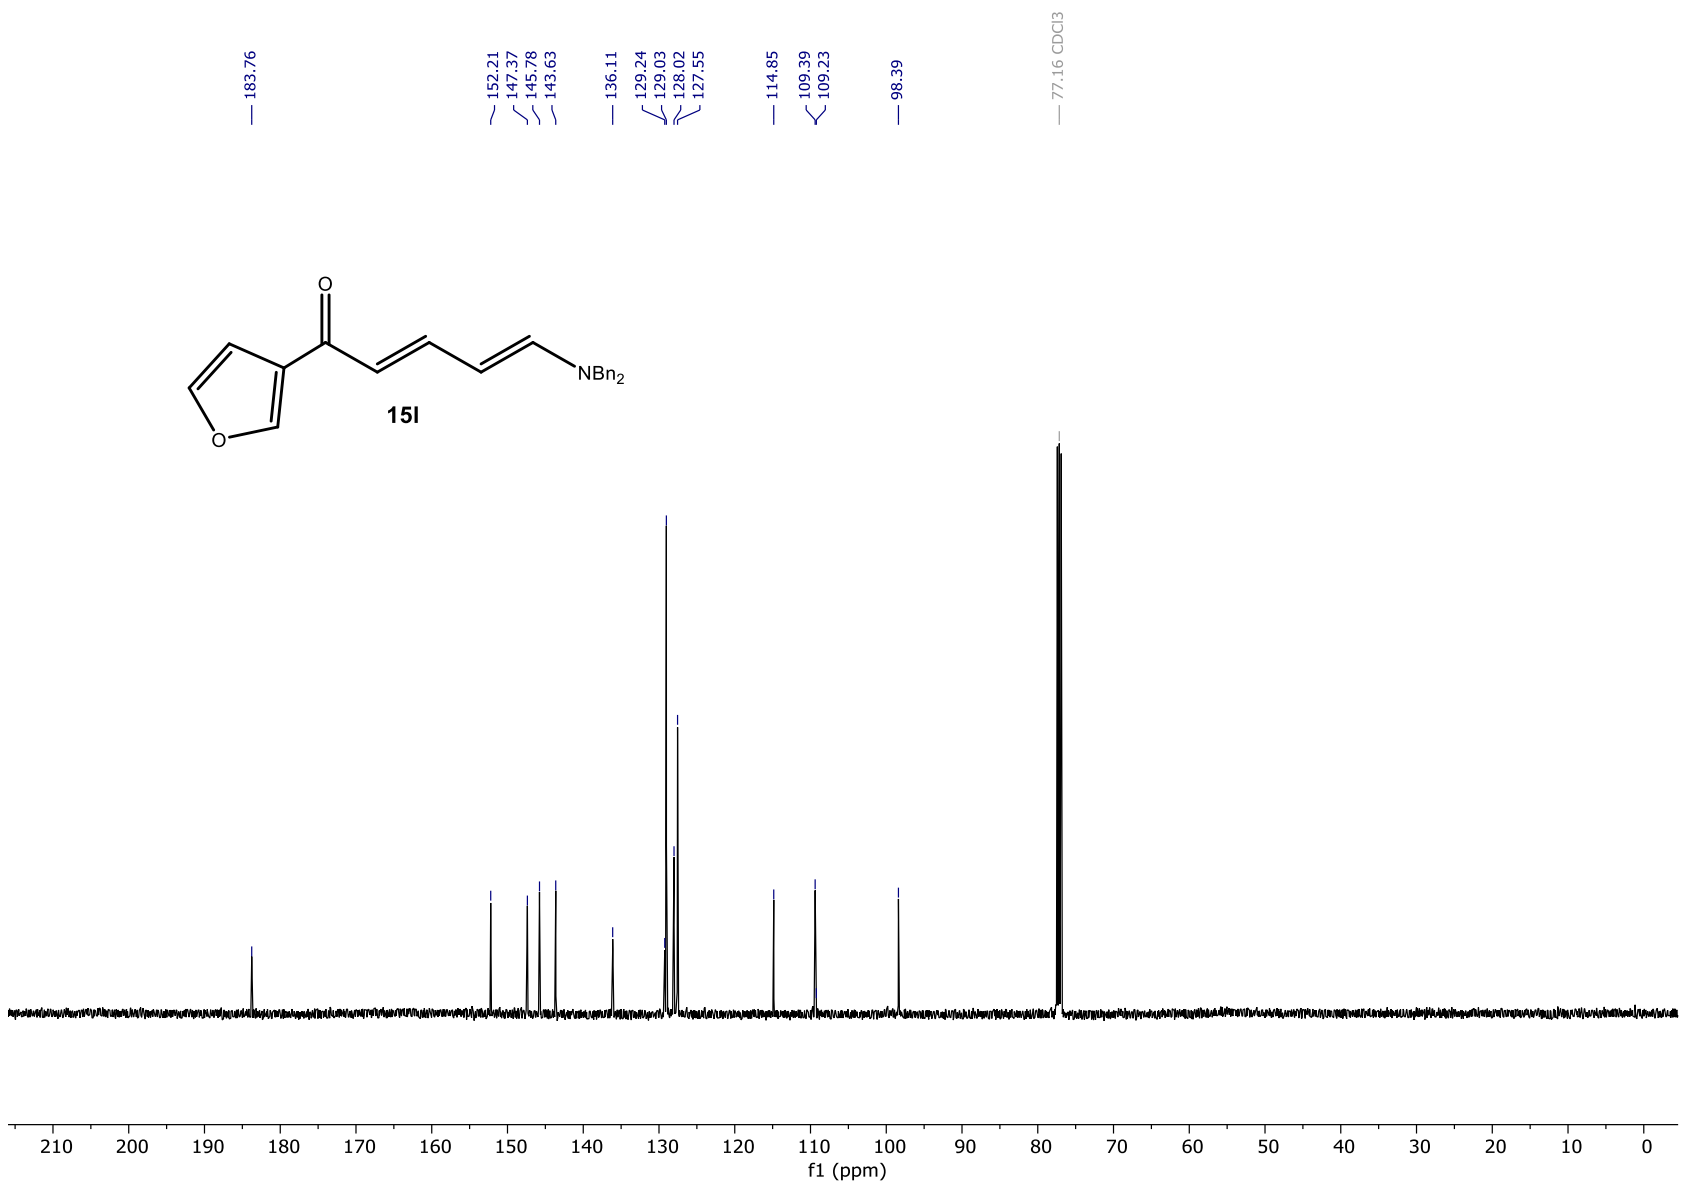

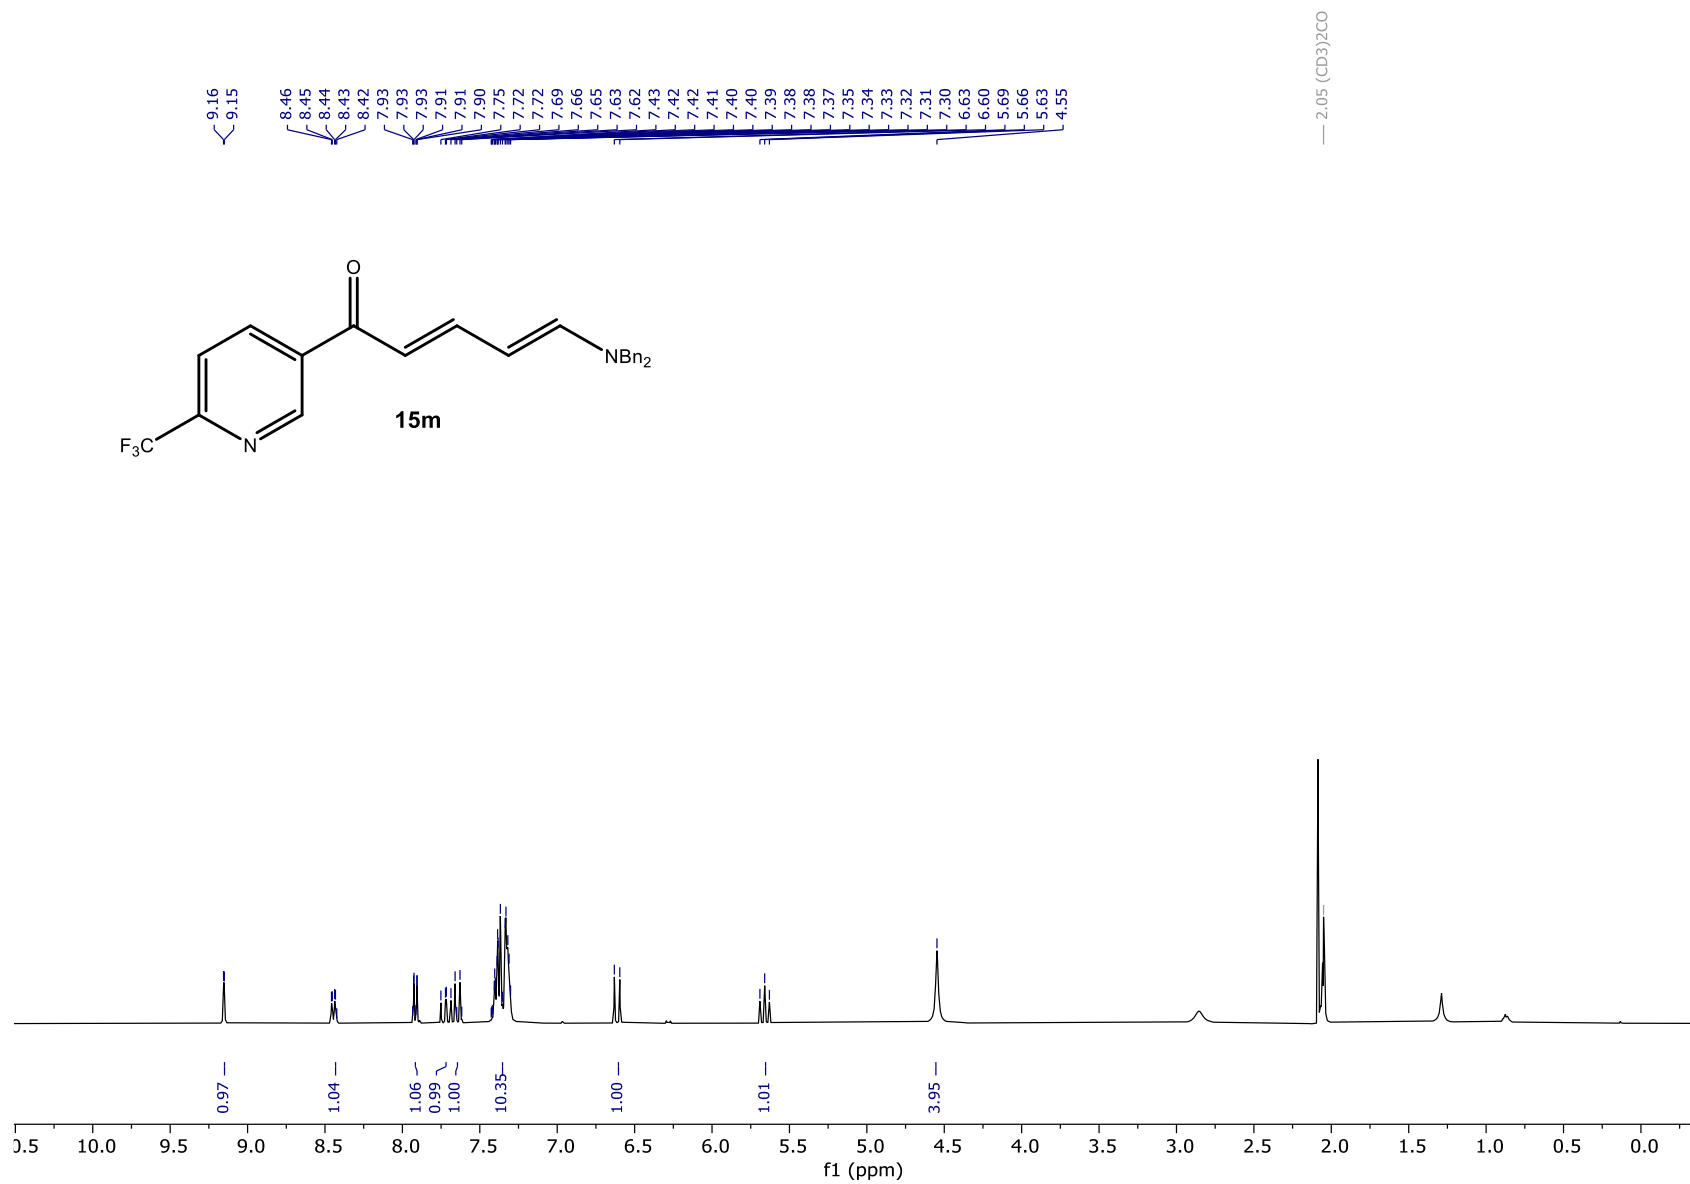

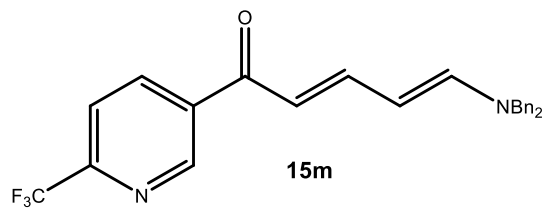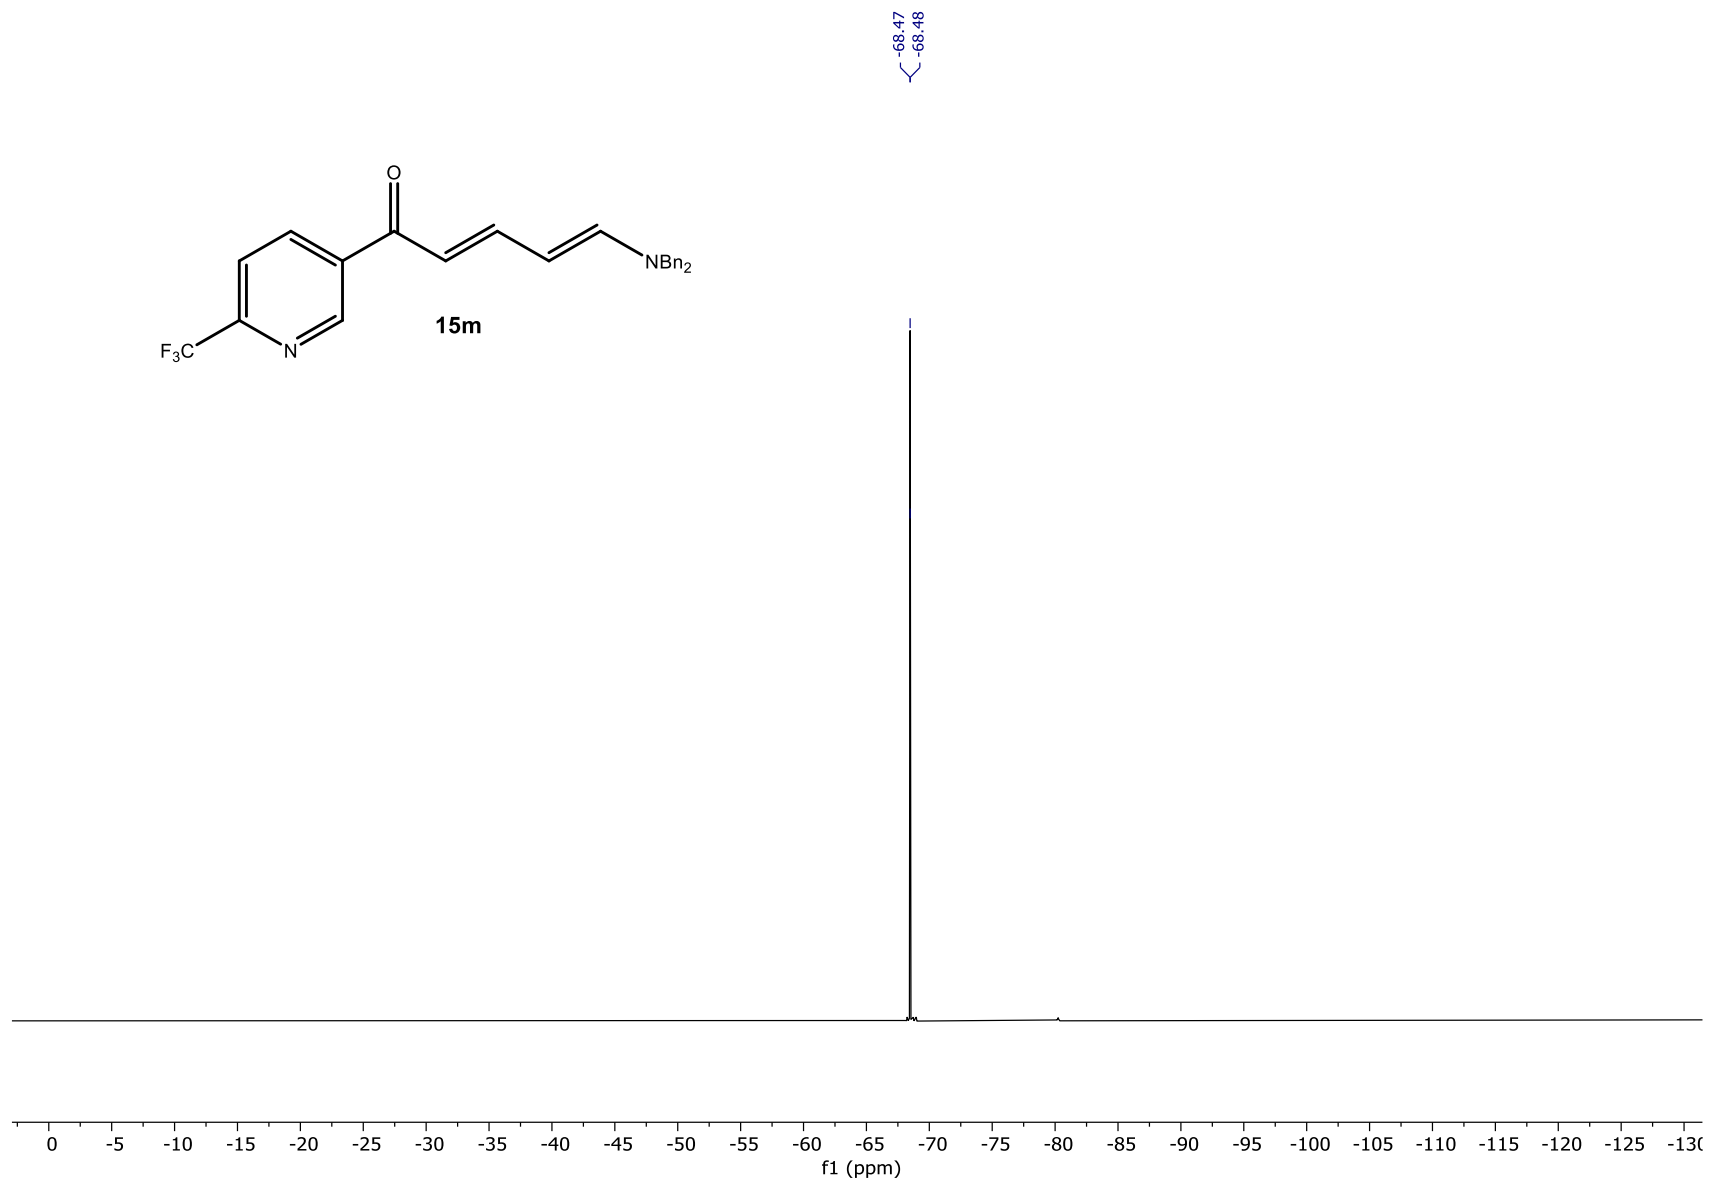

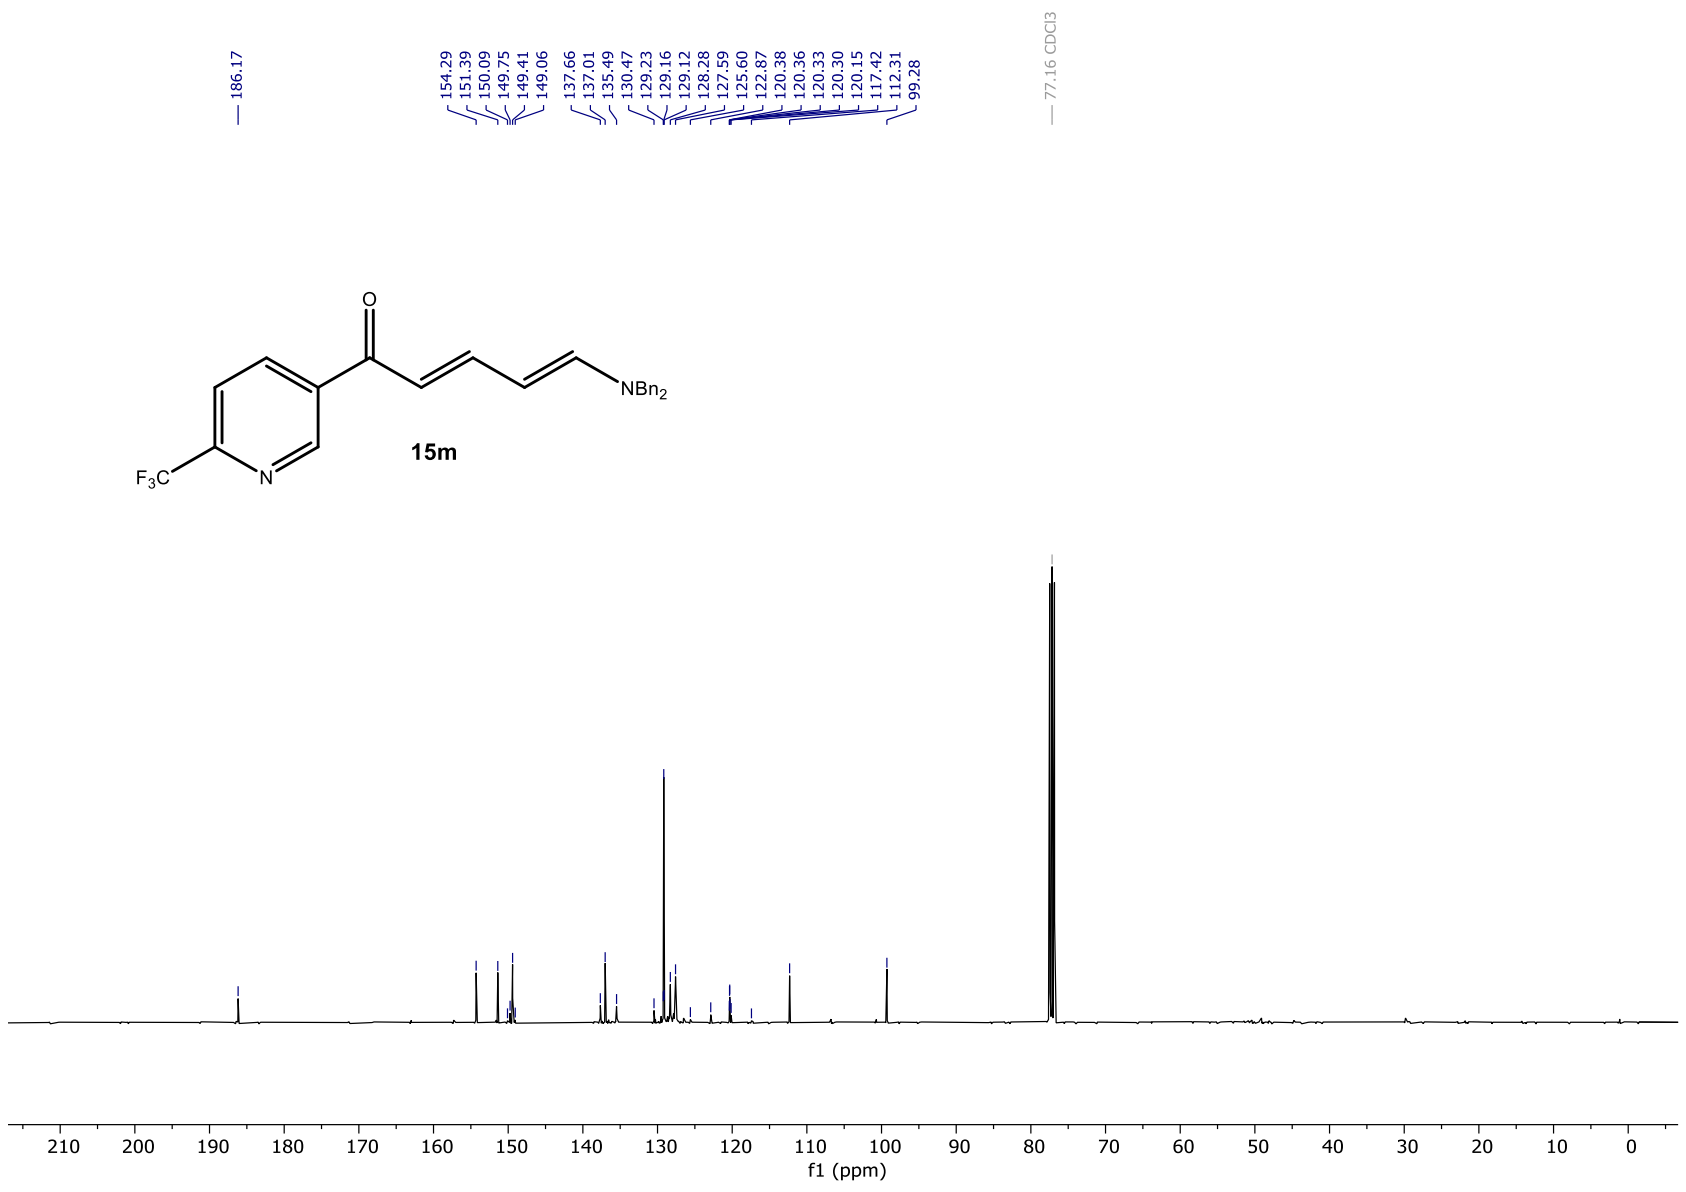

8.14  
8.14  
8.14  
7.98  
7.96  
7.96  
7.95  
7.77  
7.74  
7.73  
7.73  
7.70  
7.70  
7.60  
7.60  
7.60  
7.58  
7.58  
7.58  
7.56  
7.52  
7.52  
7.51  
7.51  
7.51  
7.50  
7.50  
7.49  
7.49  
7.49  
7.48  
7.47  
7.47  
7.47  
7.40  
7.40  
7.39  
7.39  
7.38  
7.38  
7.37  
7.37  
7.36  
7.36  
7.34  
7.34  
7.34  
7.33  
7.33  
7.32  
7.26 CDCl3  
7.21  
7.20  
7.17  
6.73  
6.69  
6.69  
5.63  
5.60  
5.57  
4.38

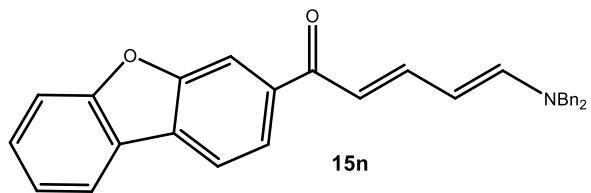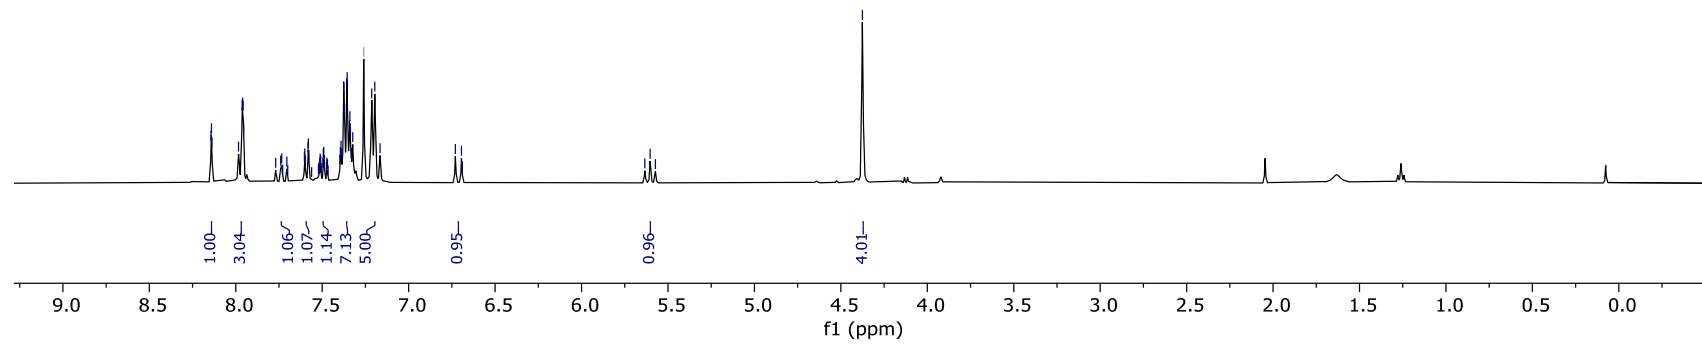

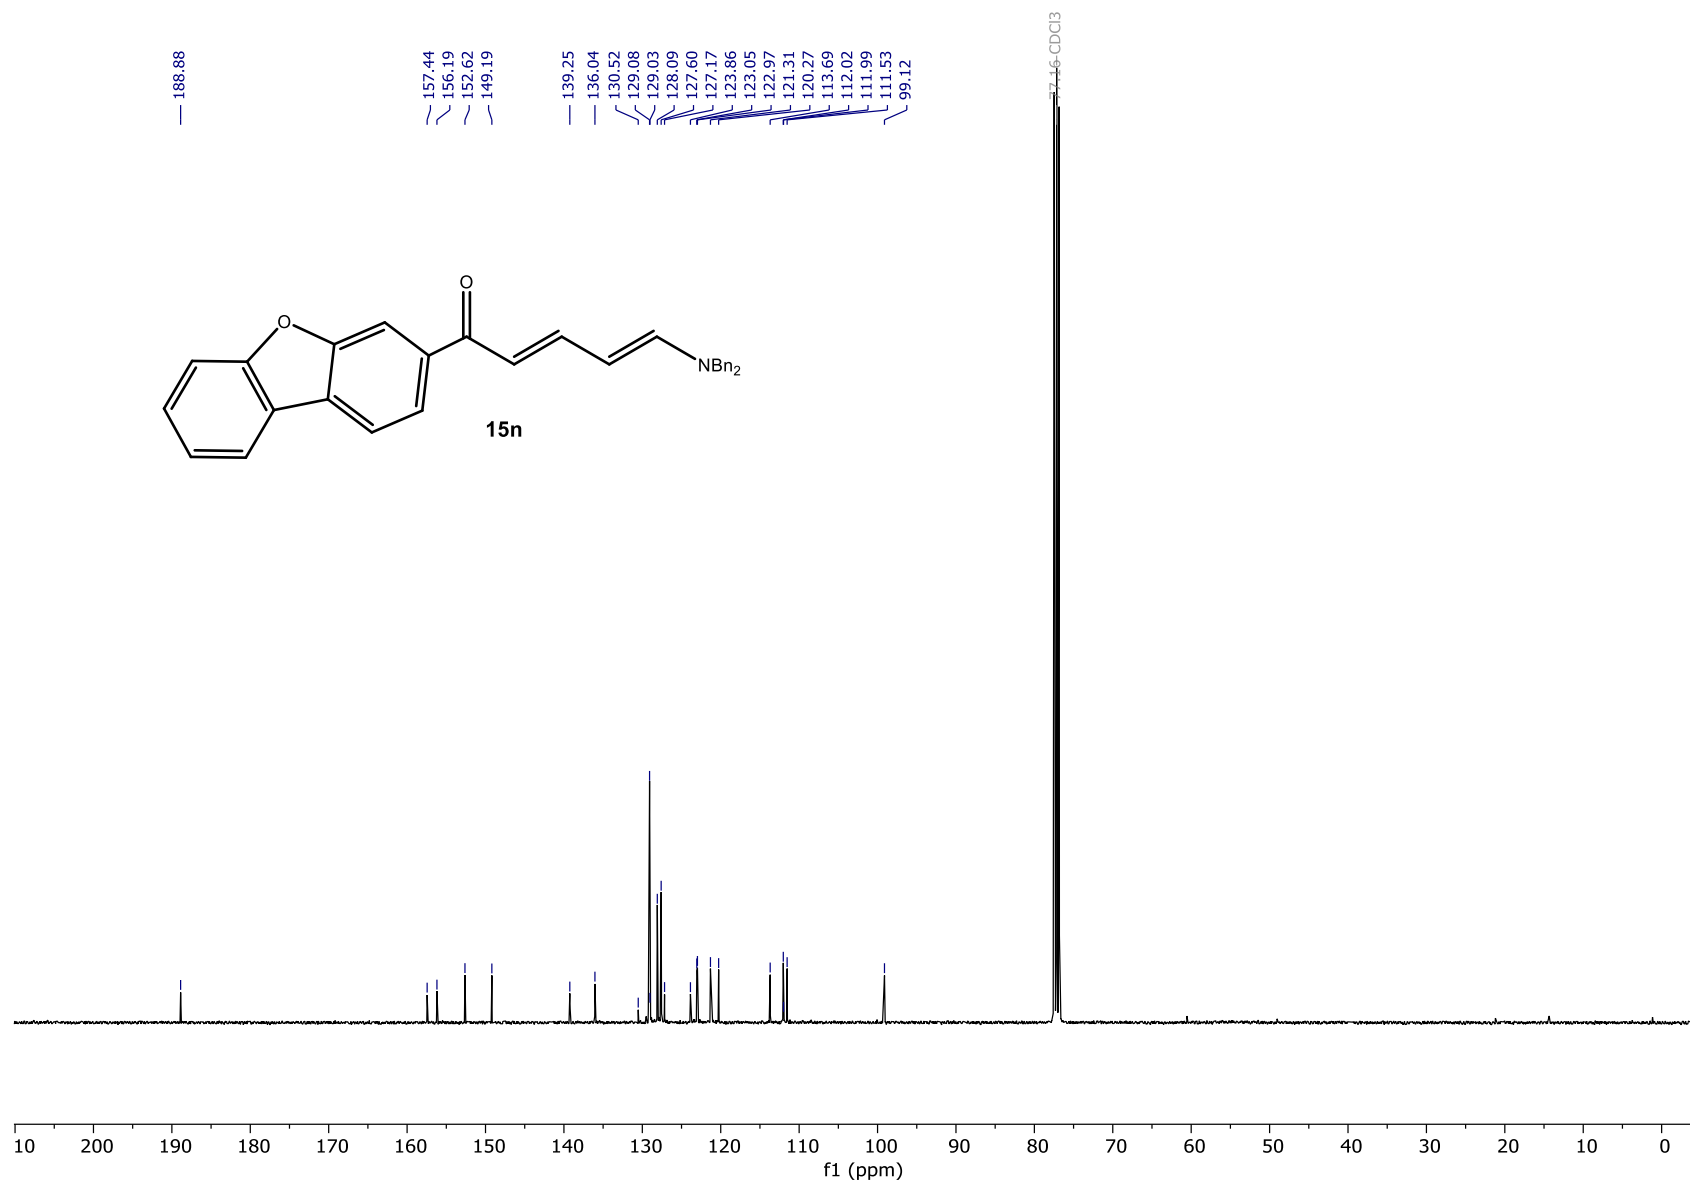

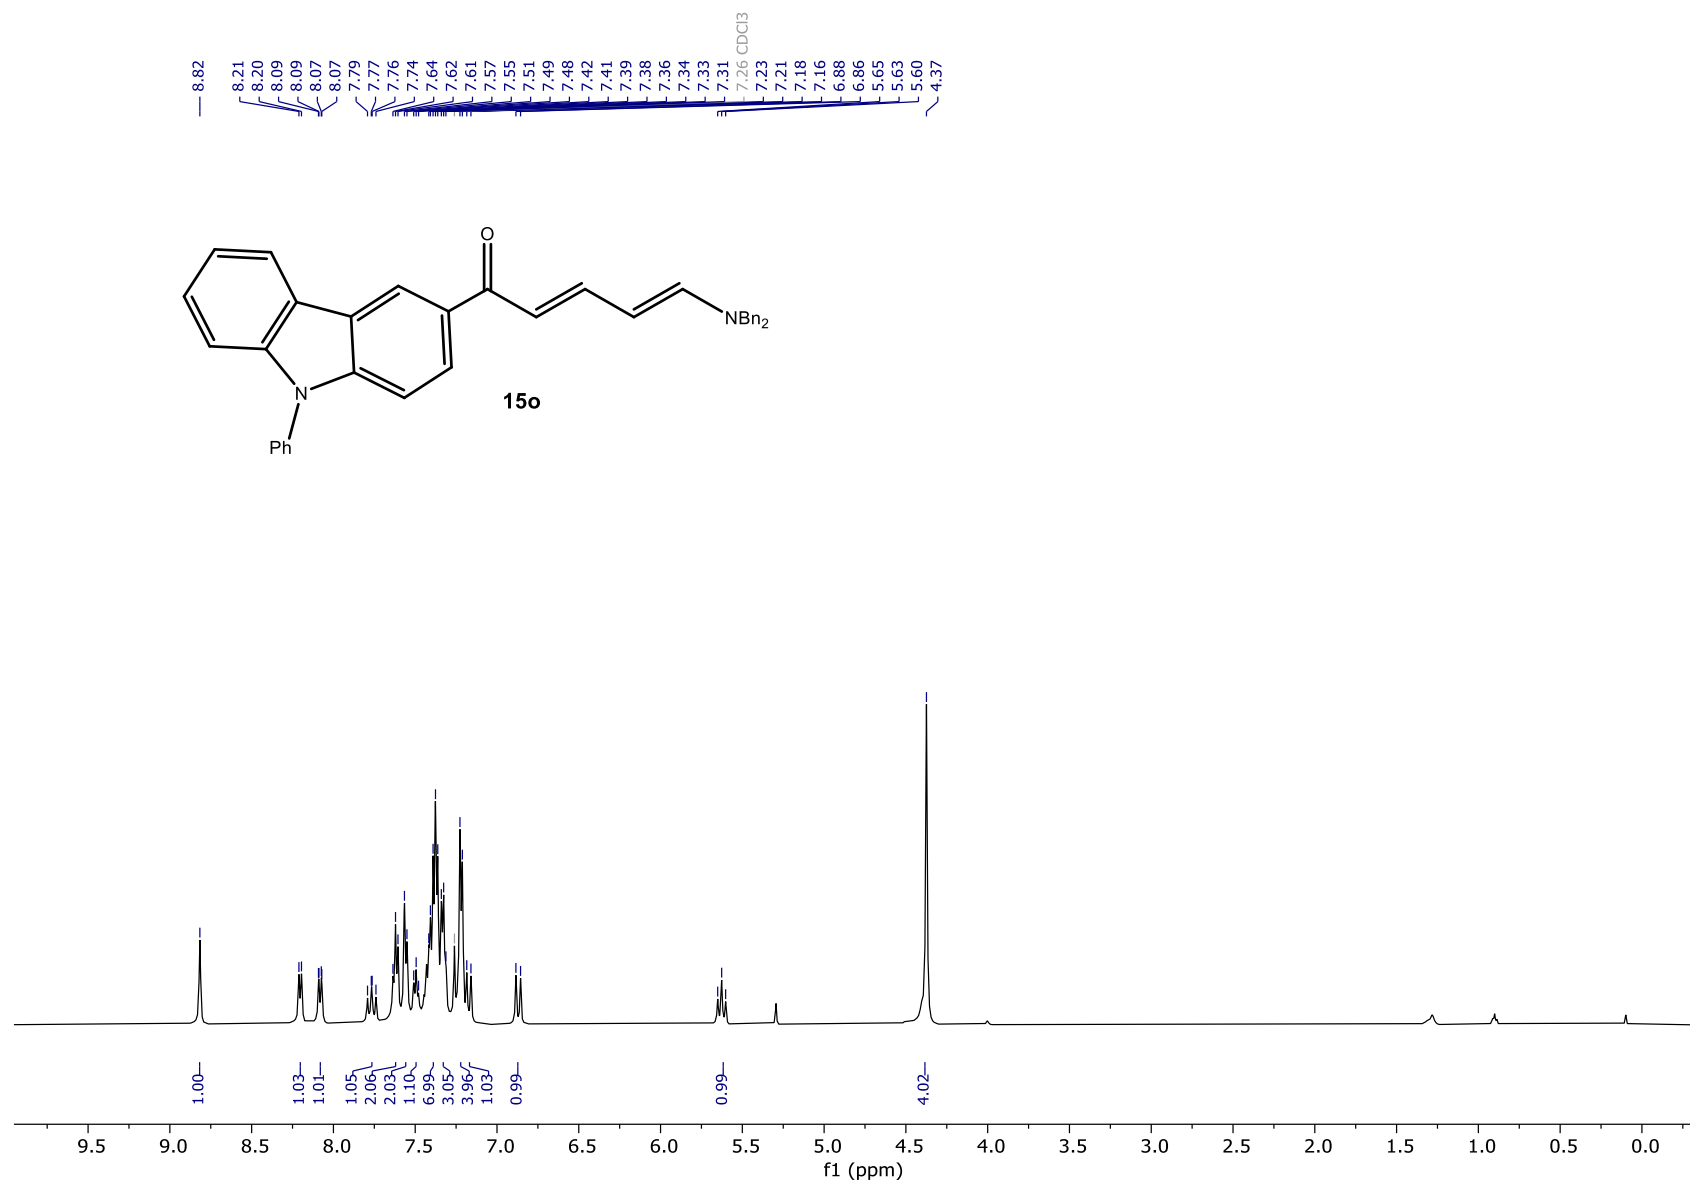

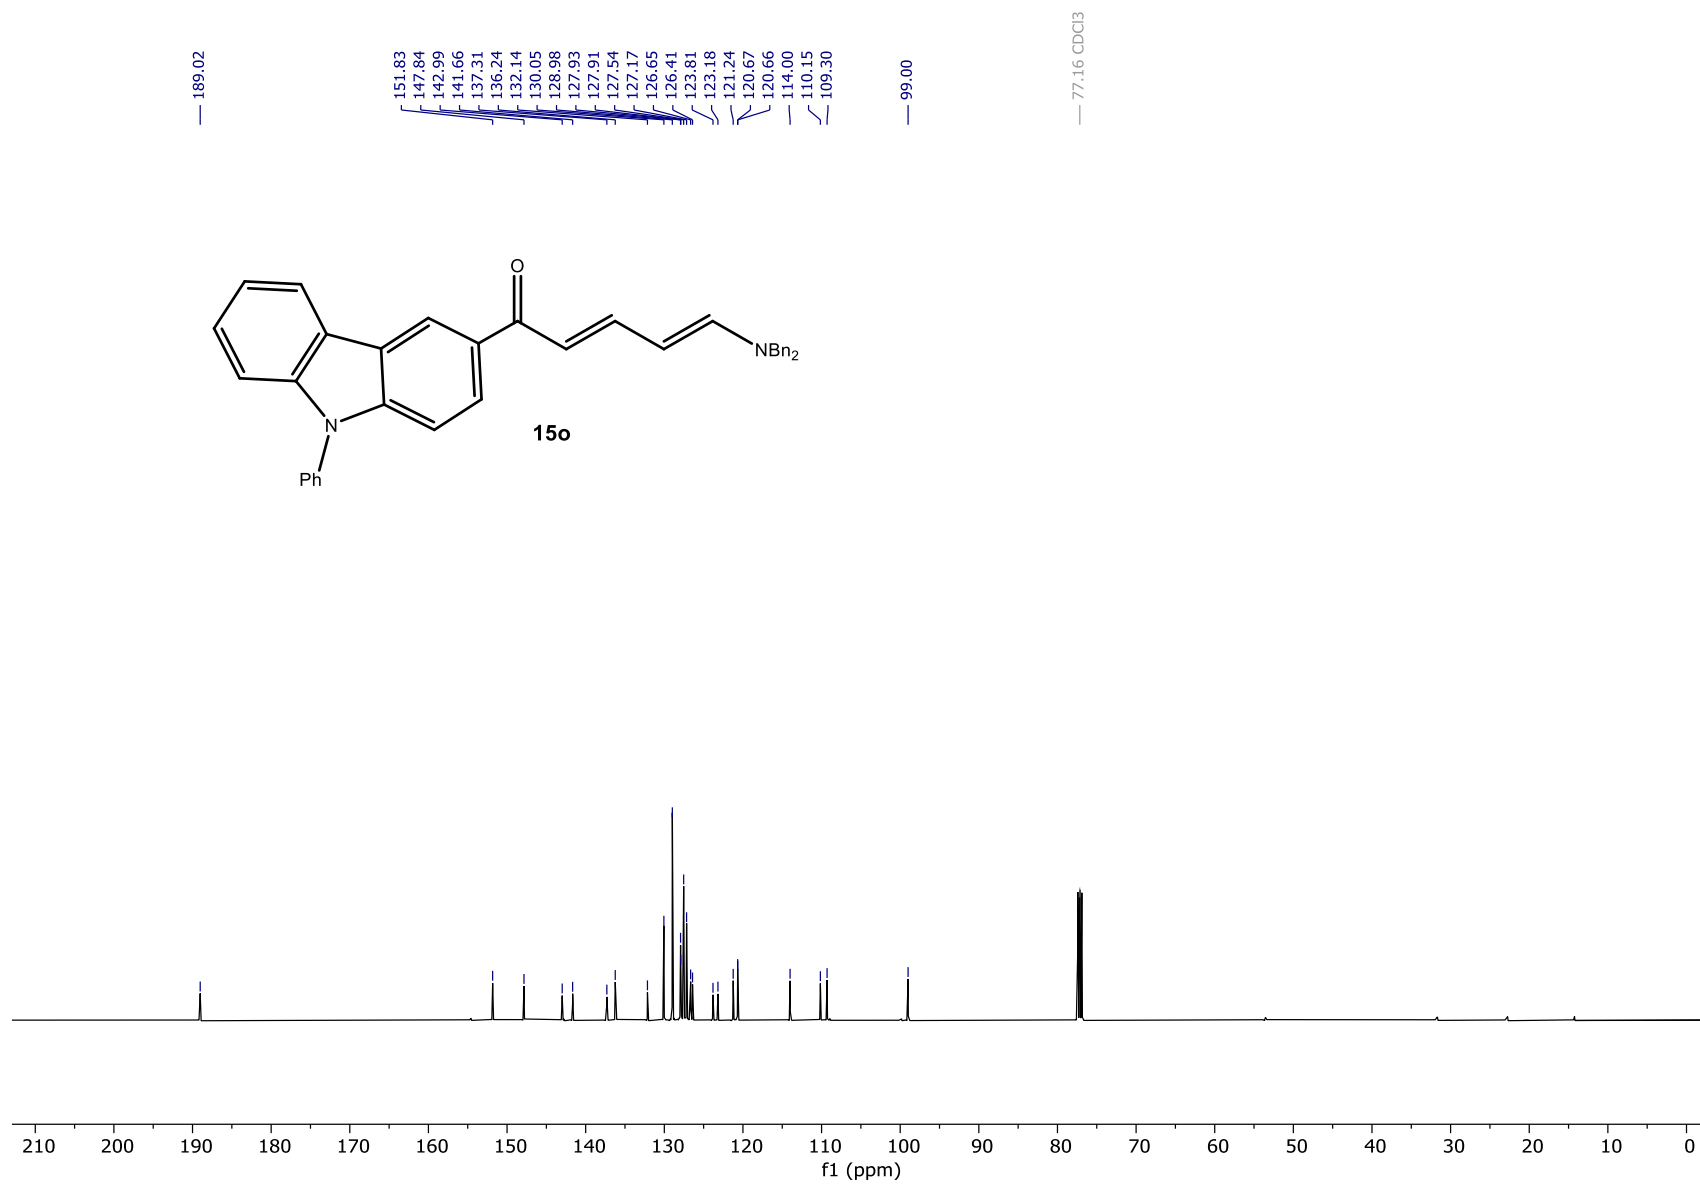

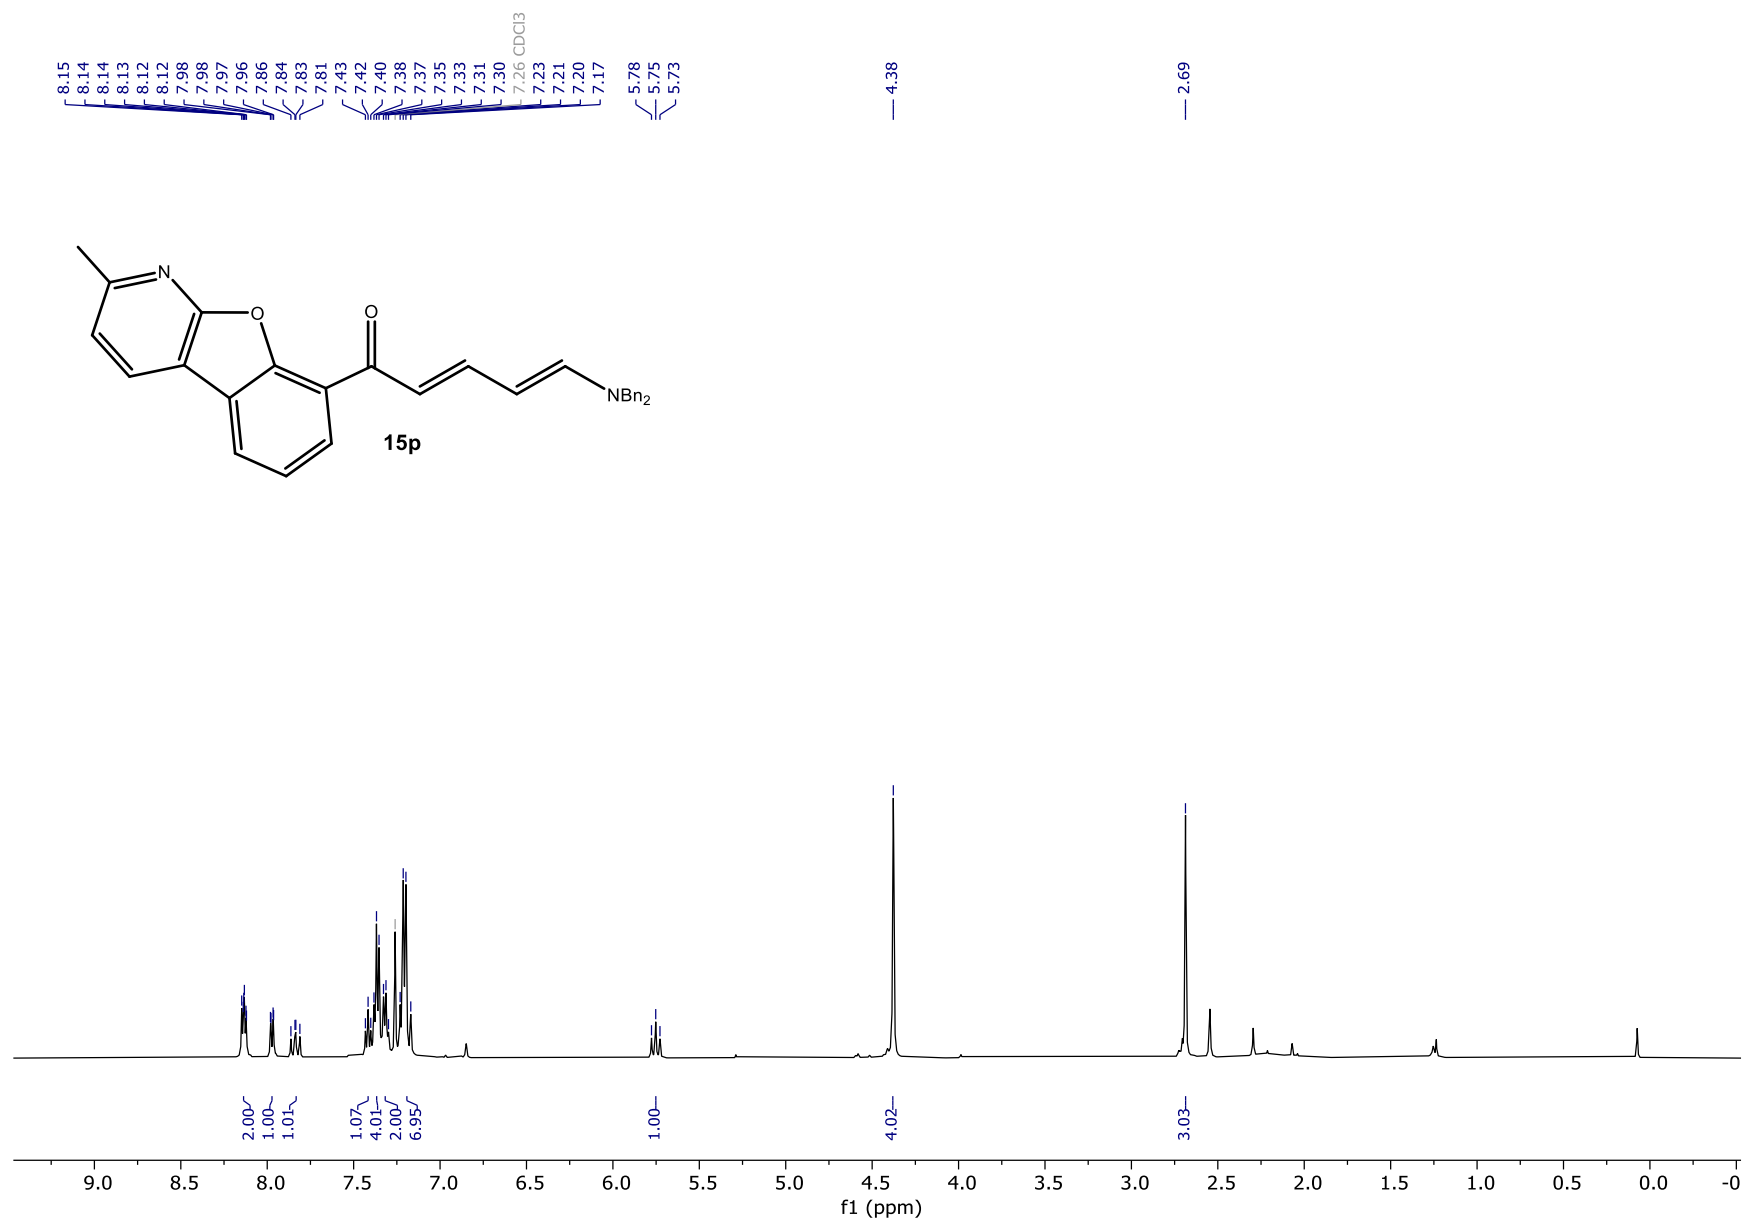

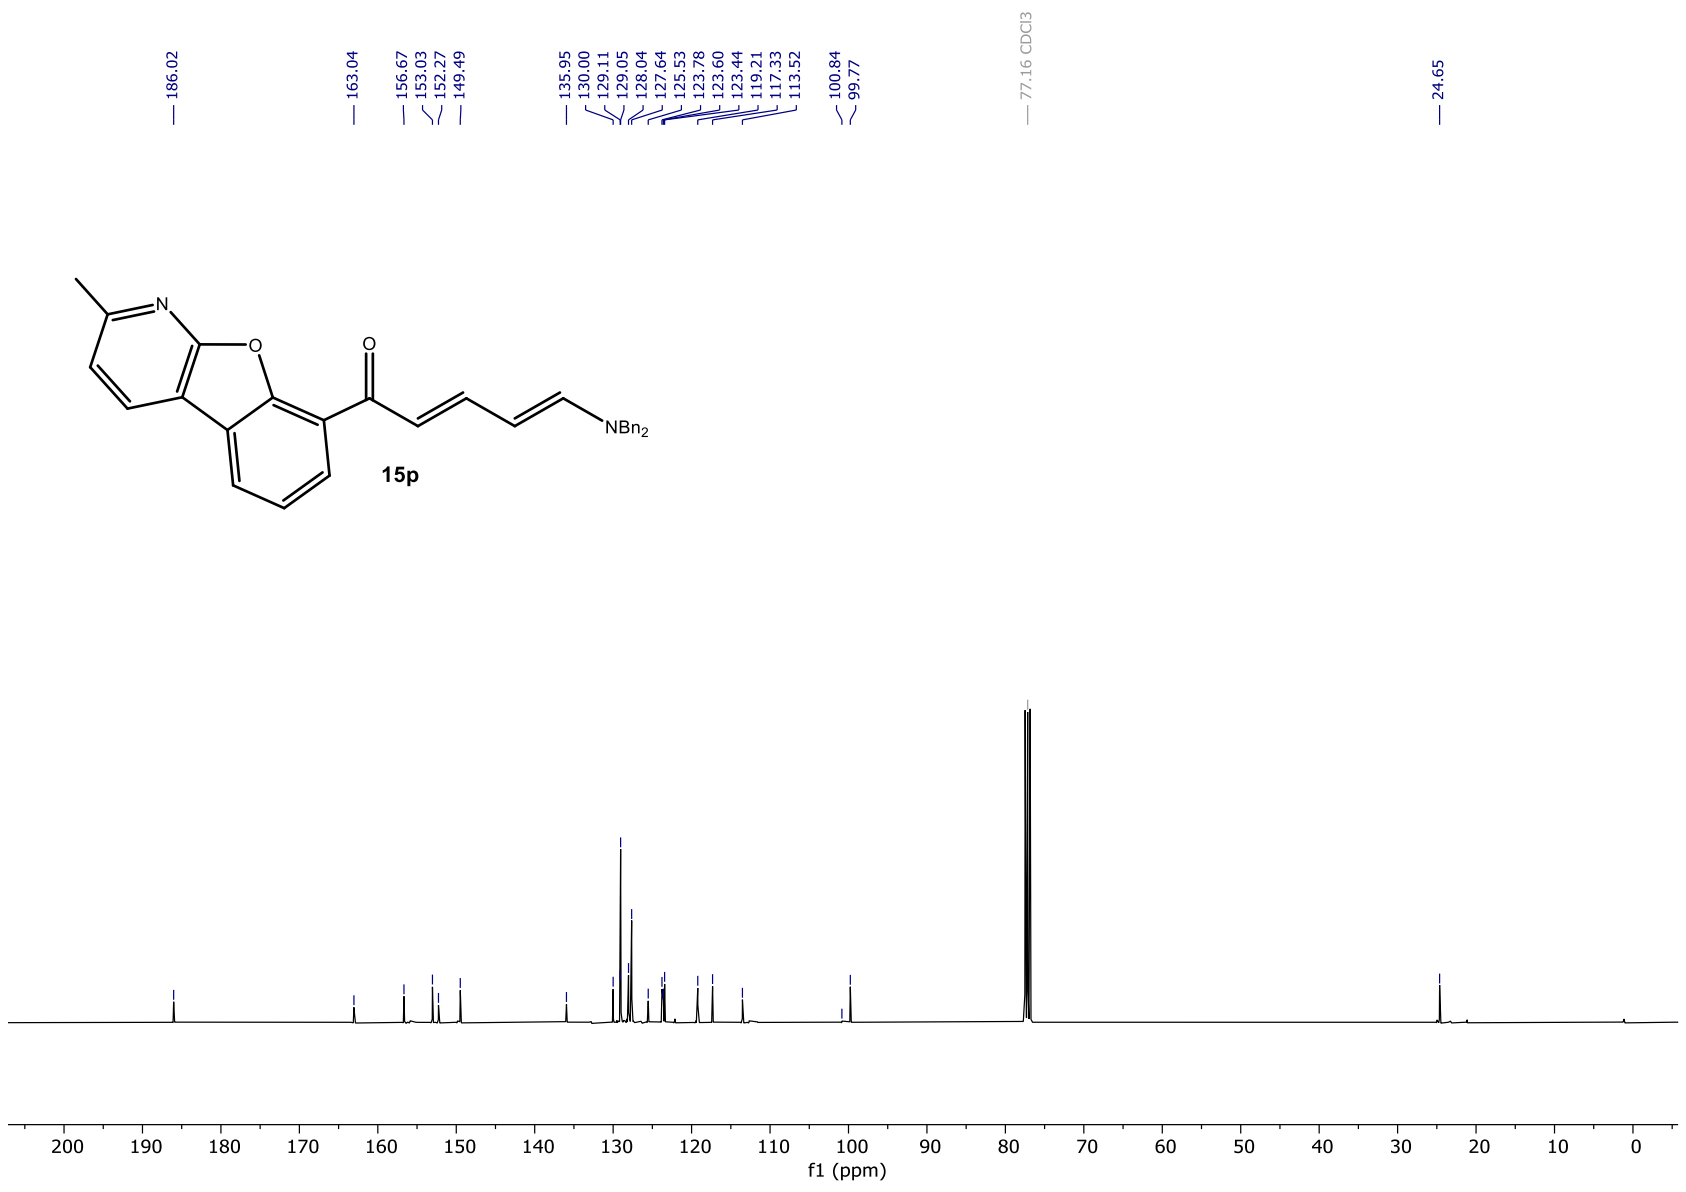

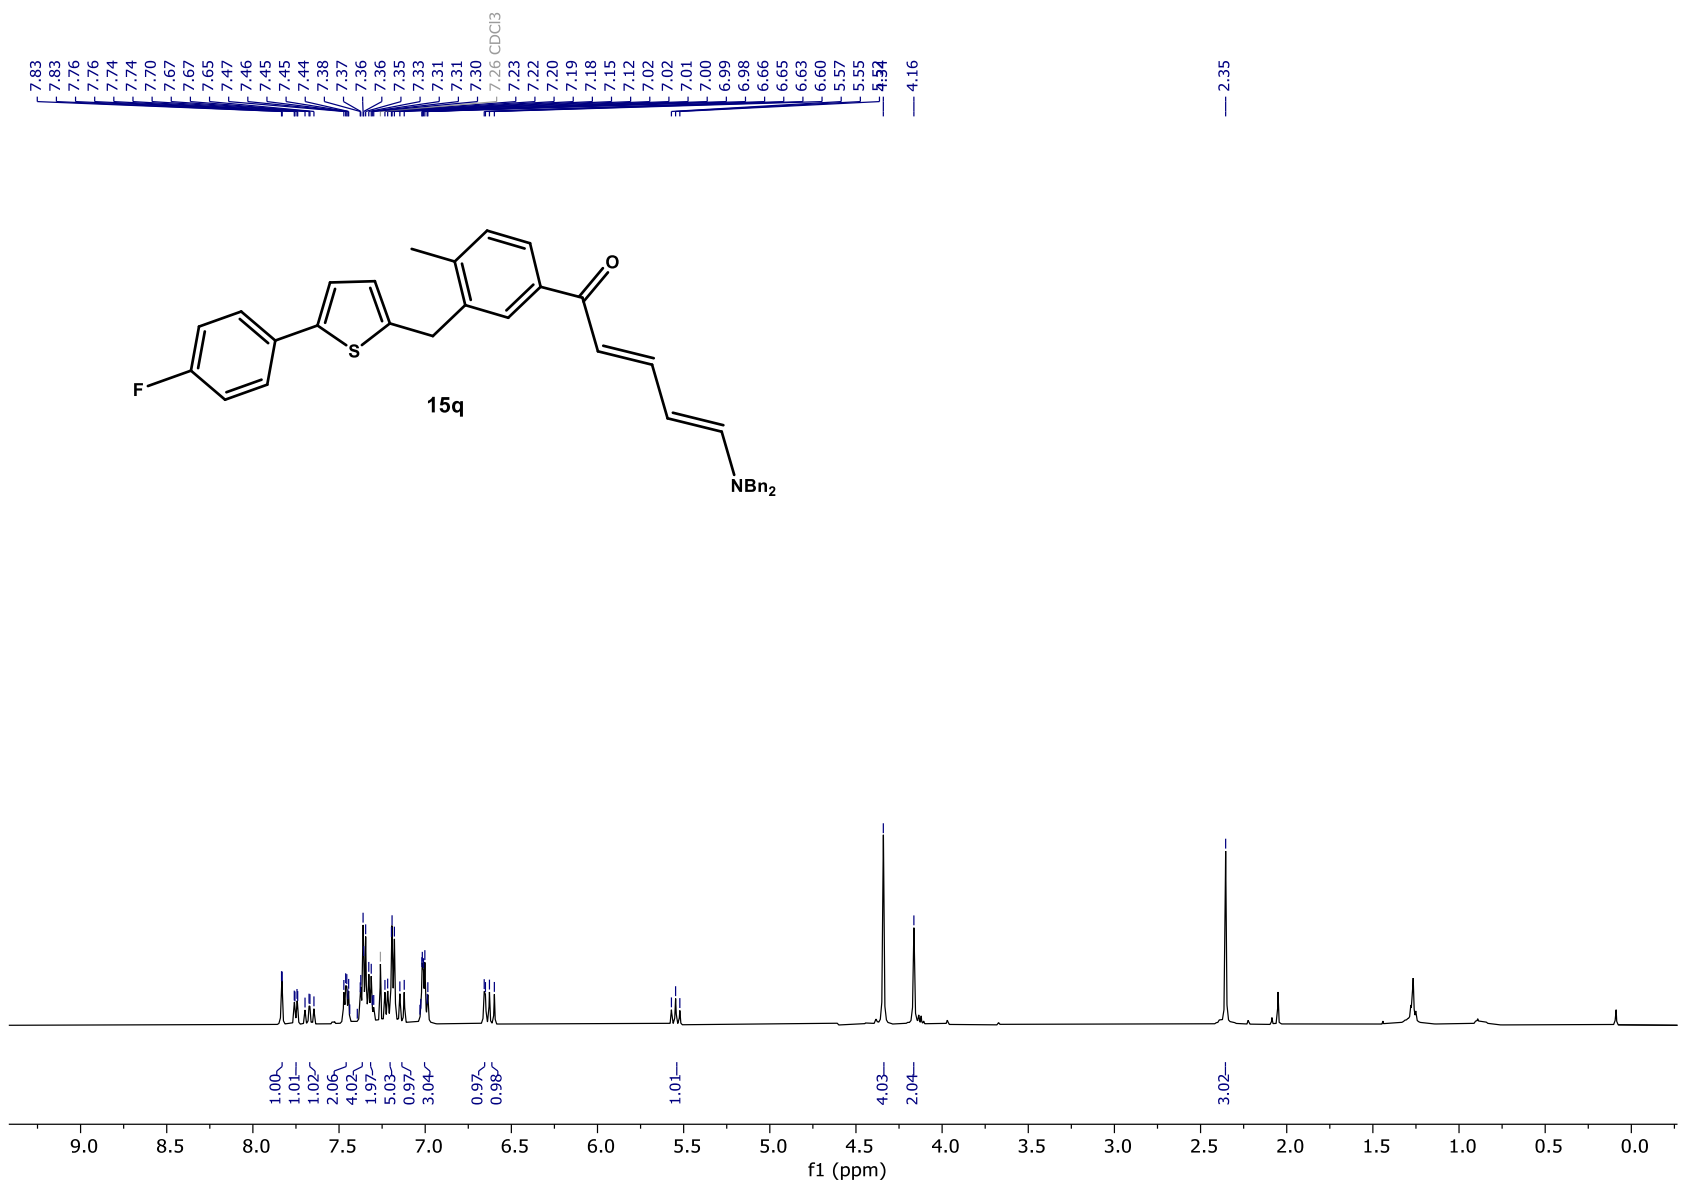

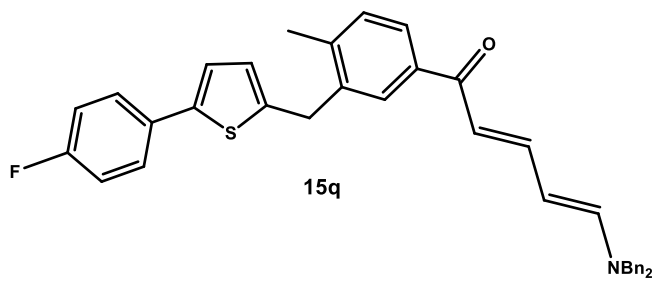

— -115.21

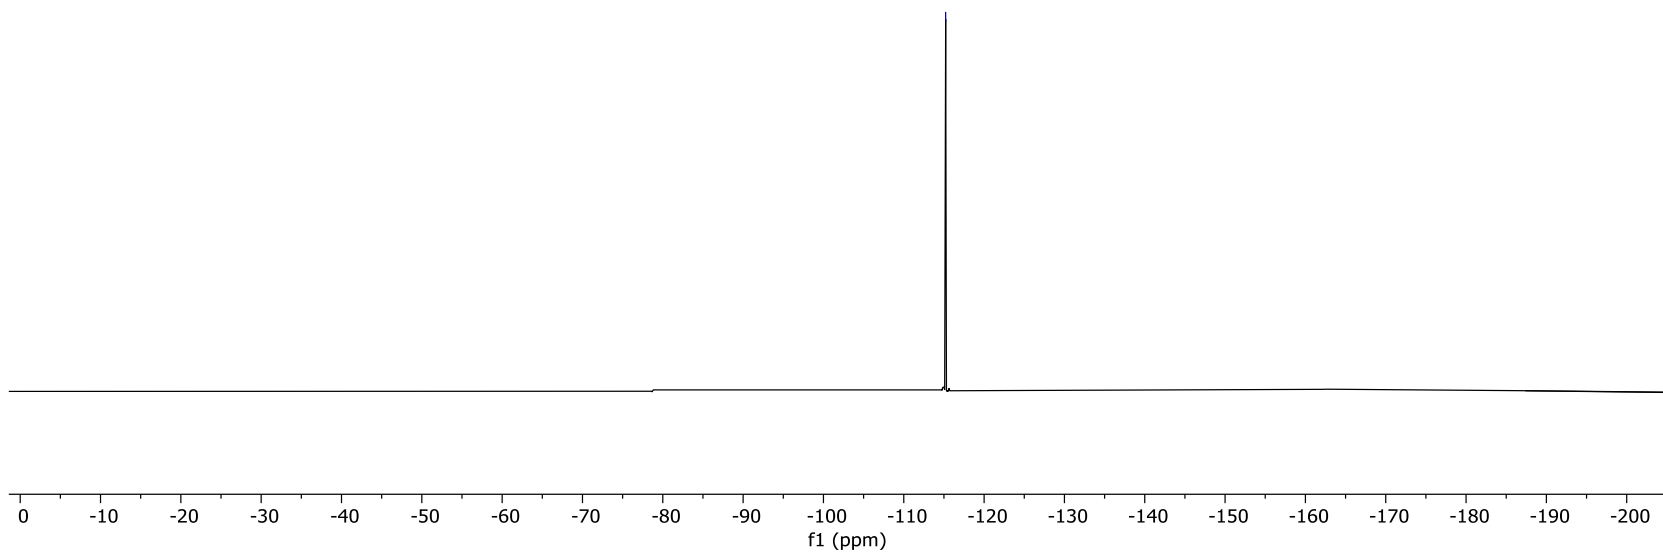

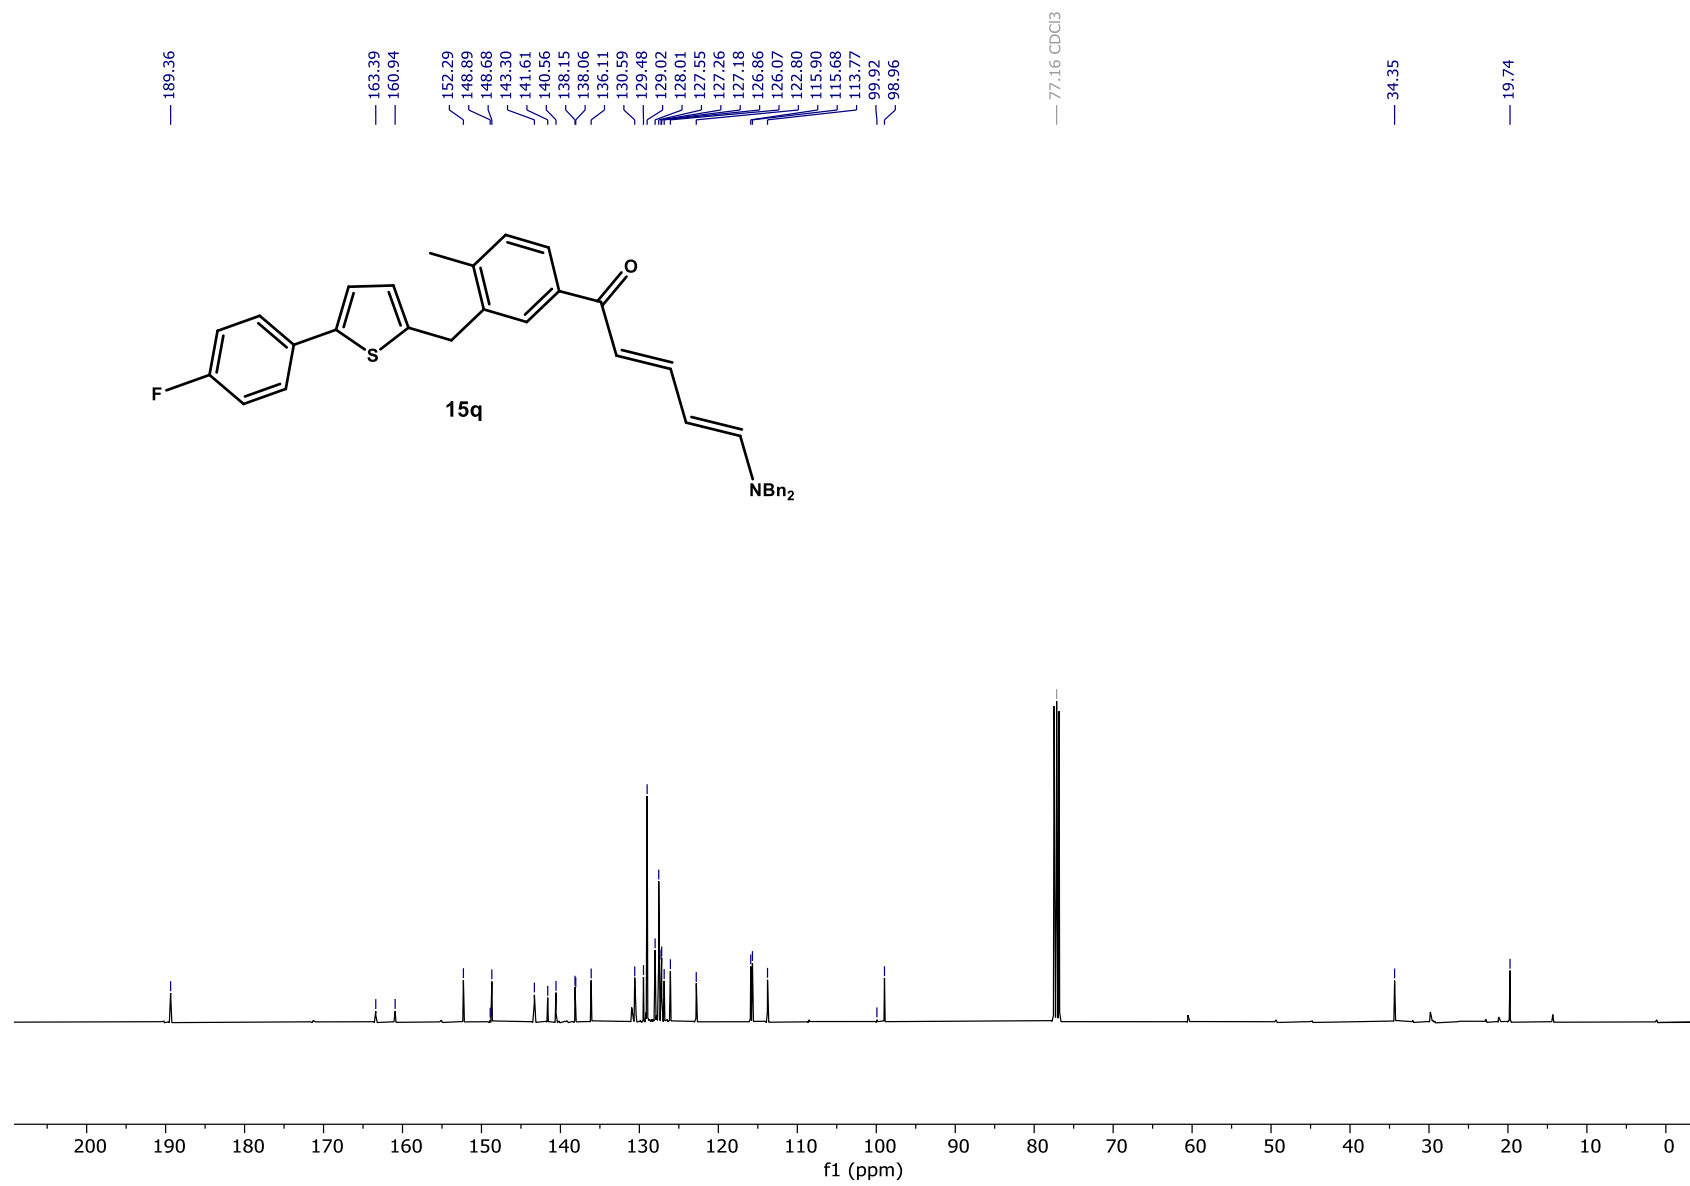

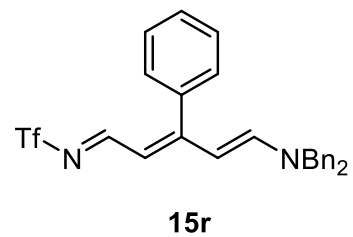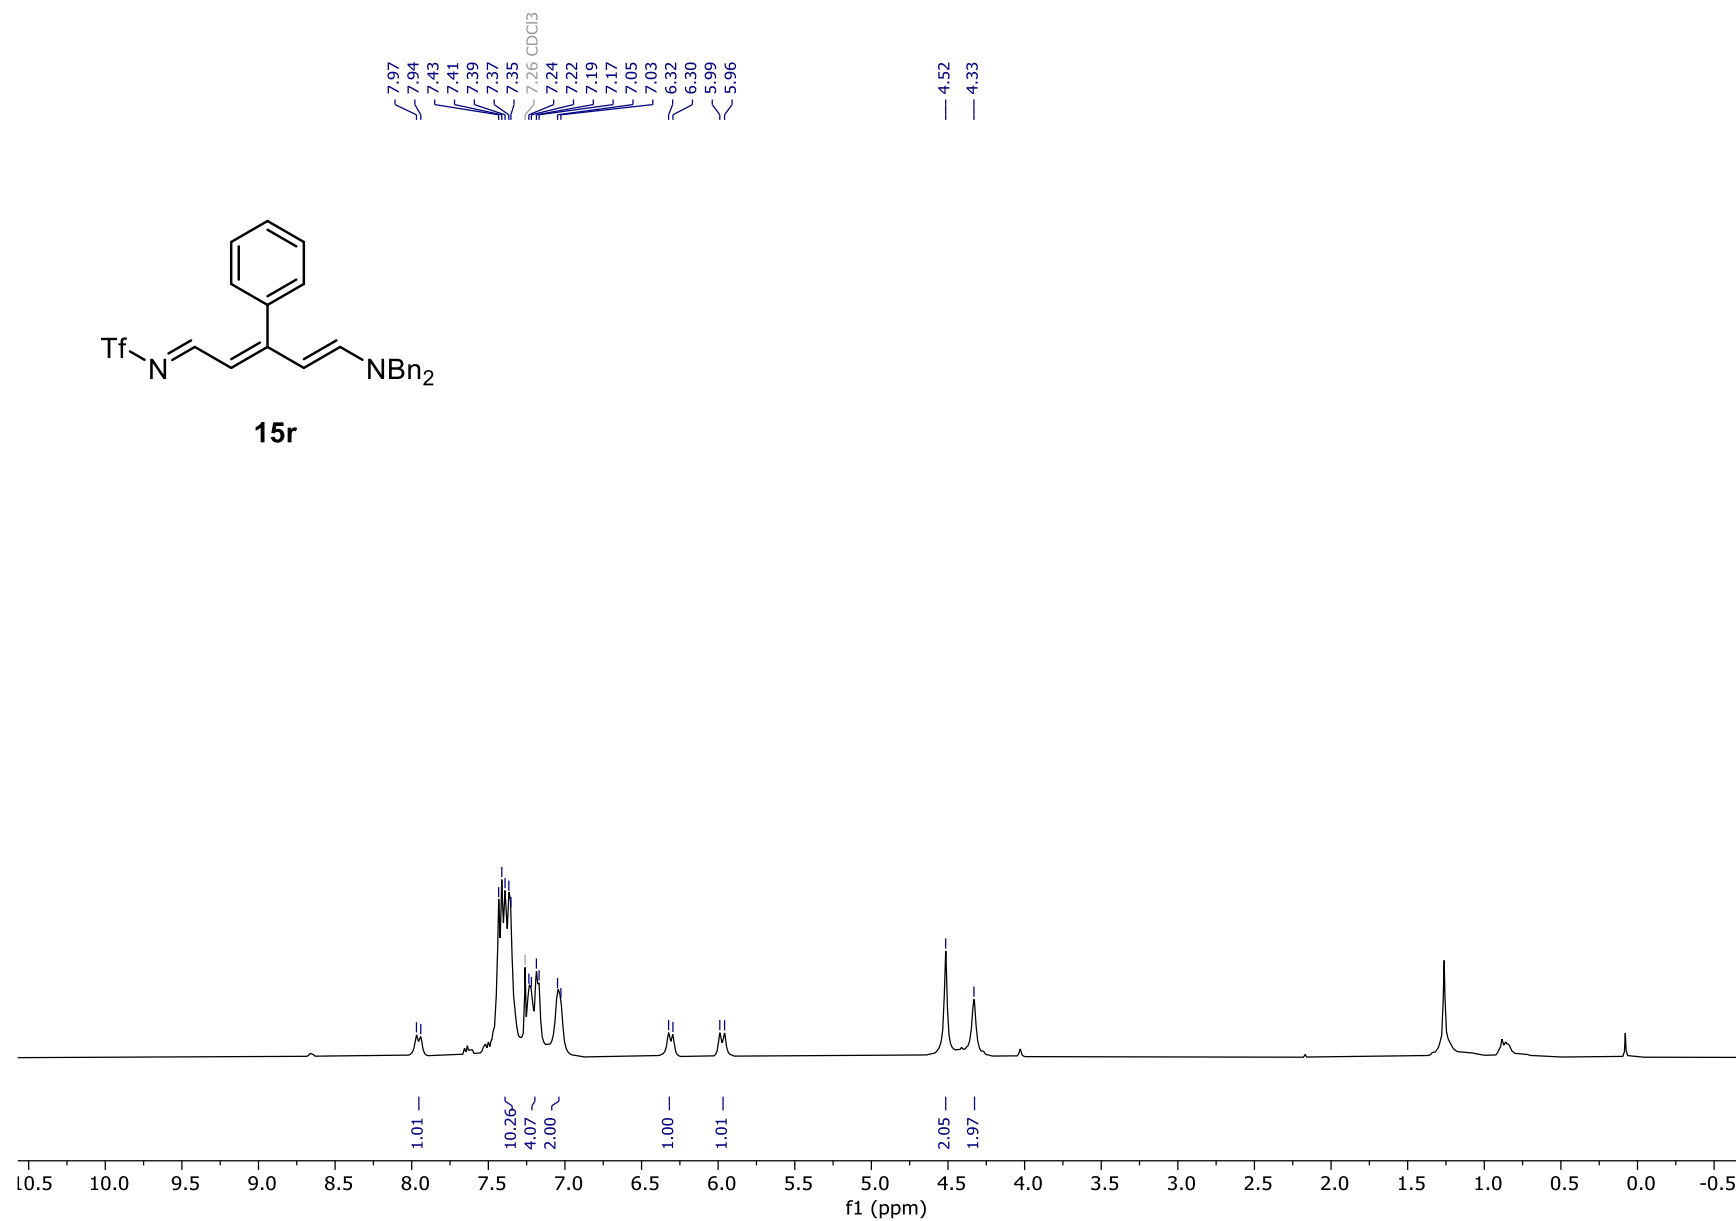

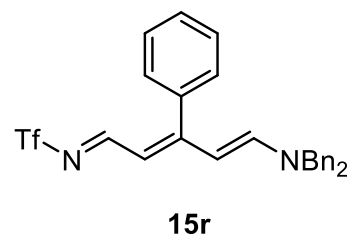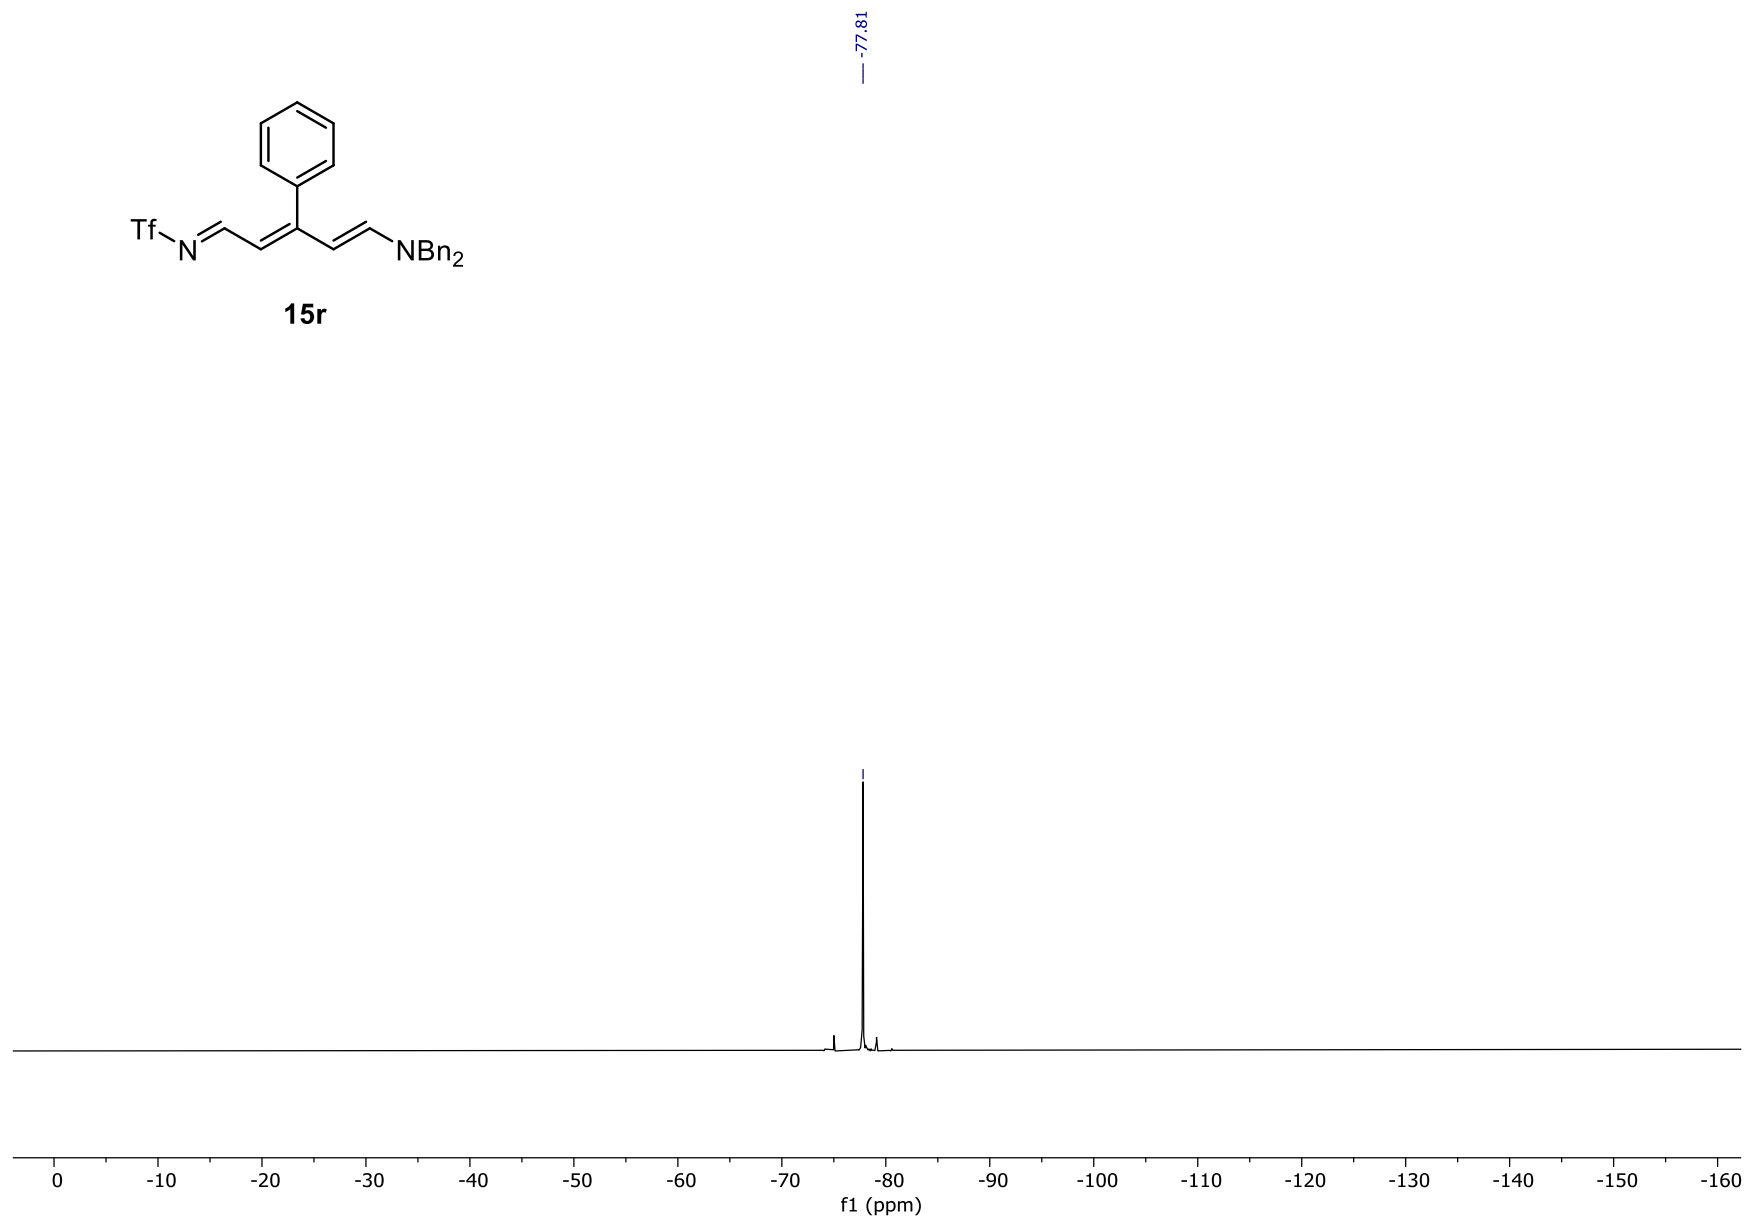

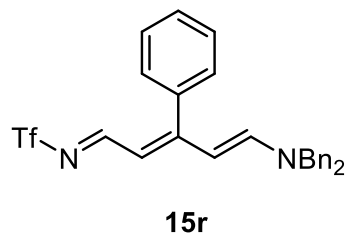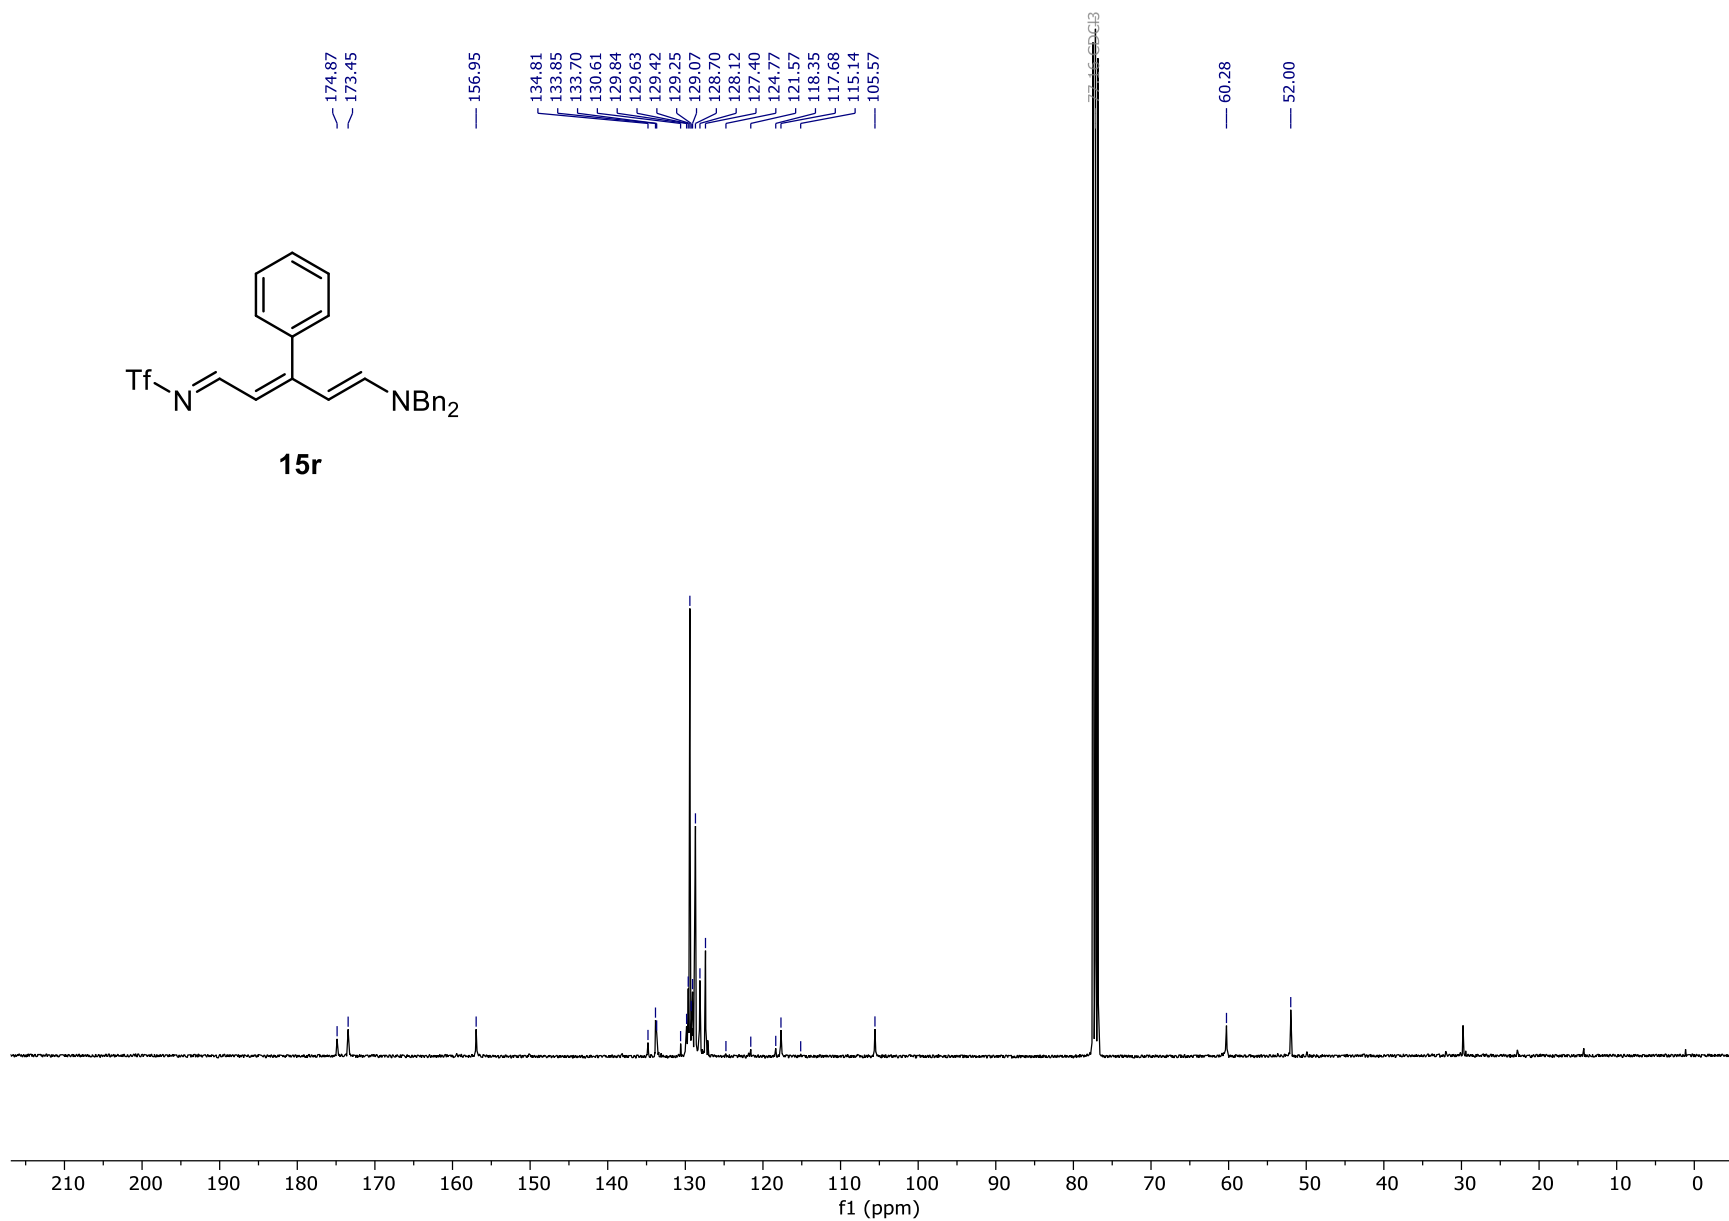

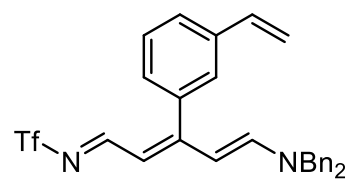

15s

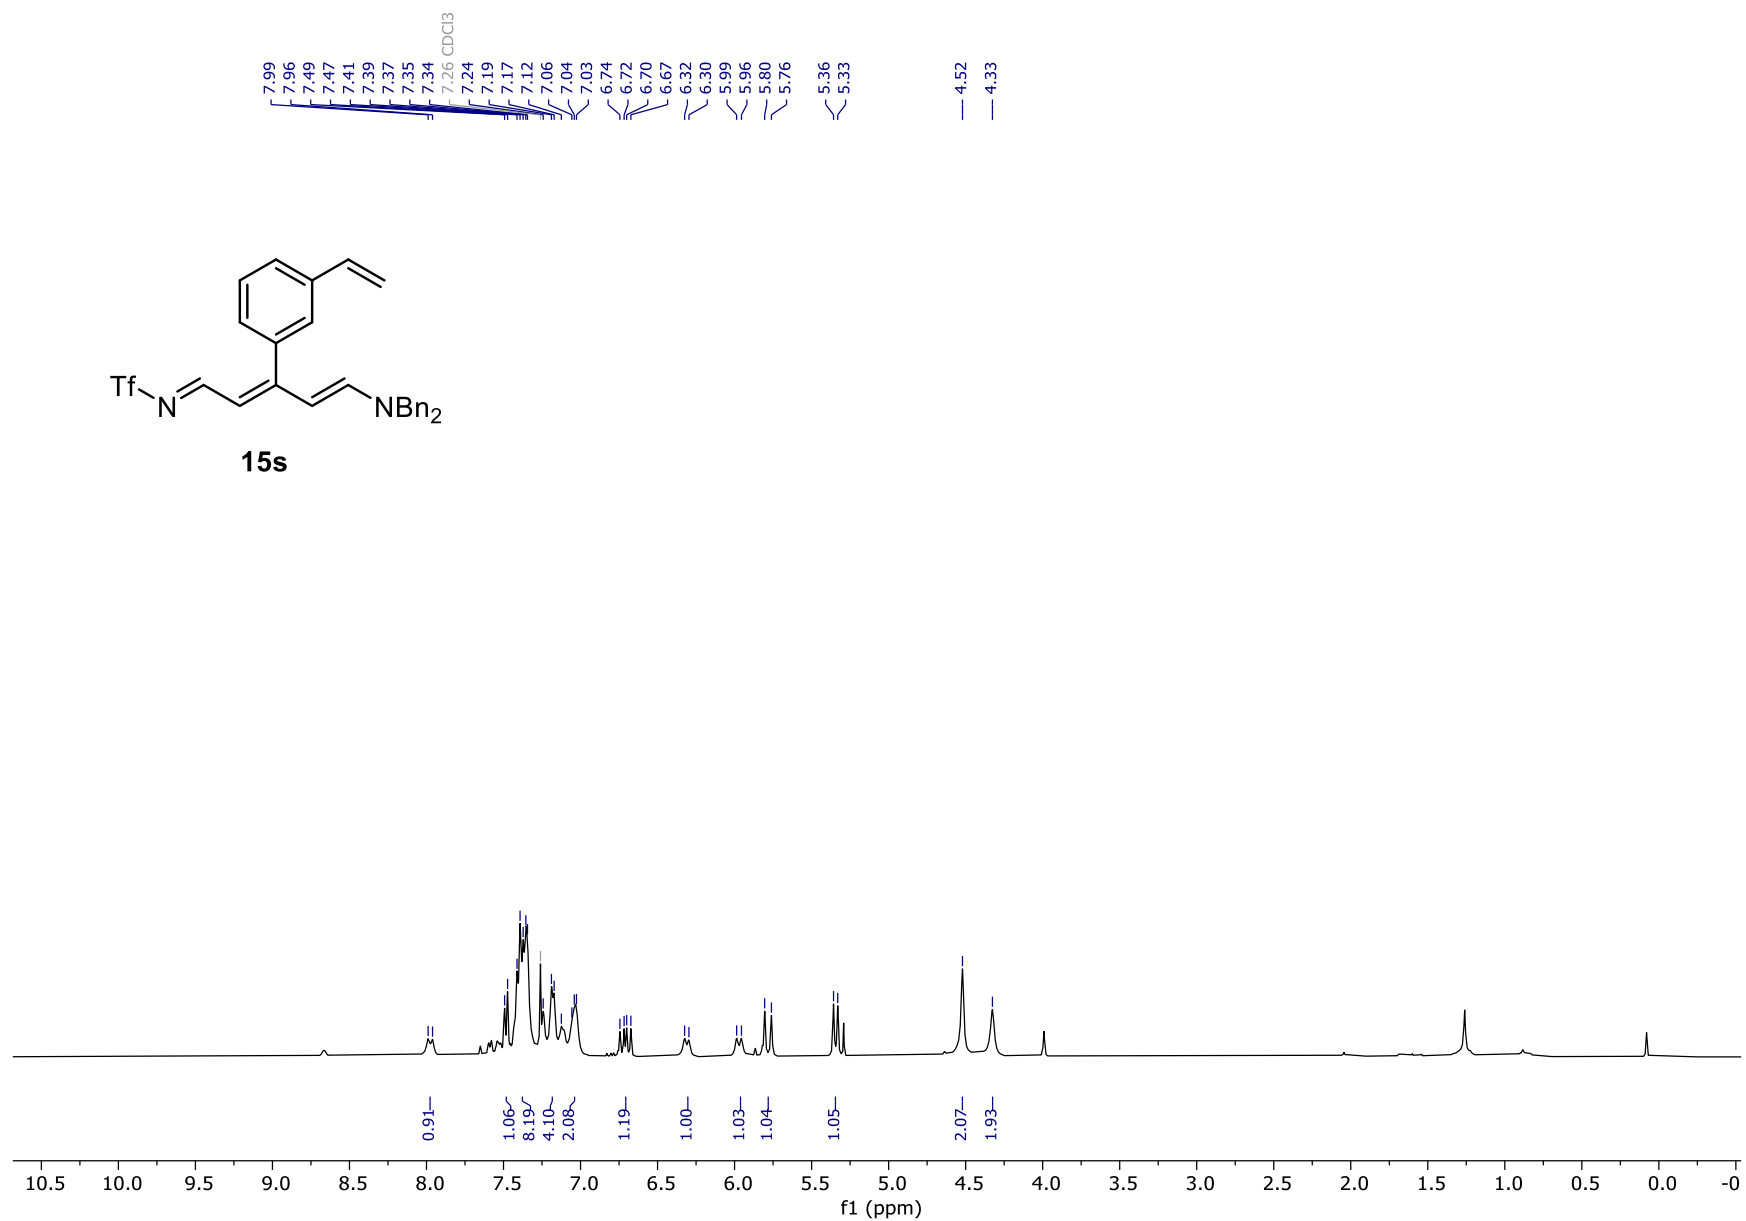

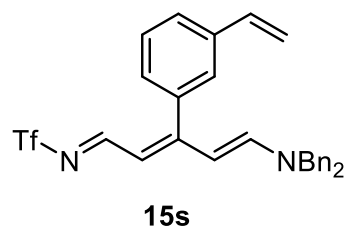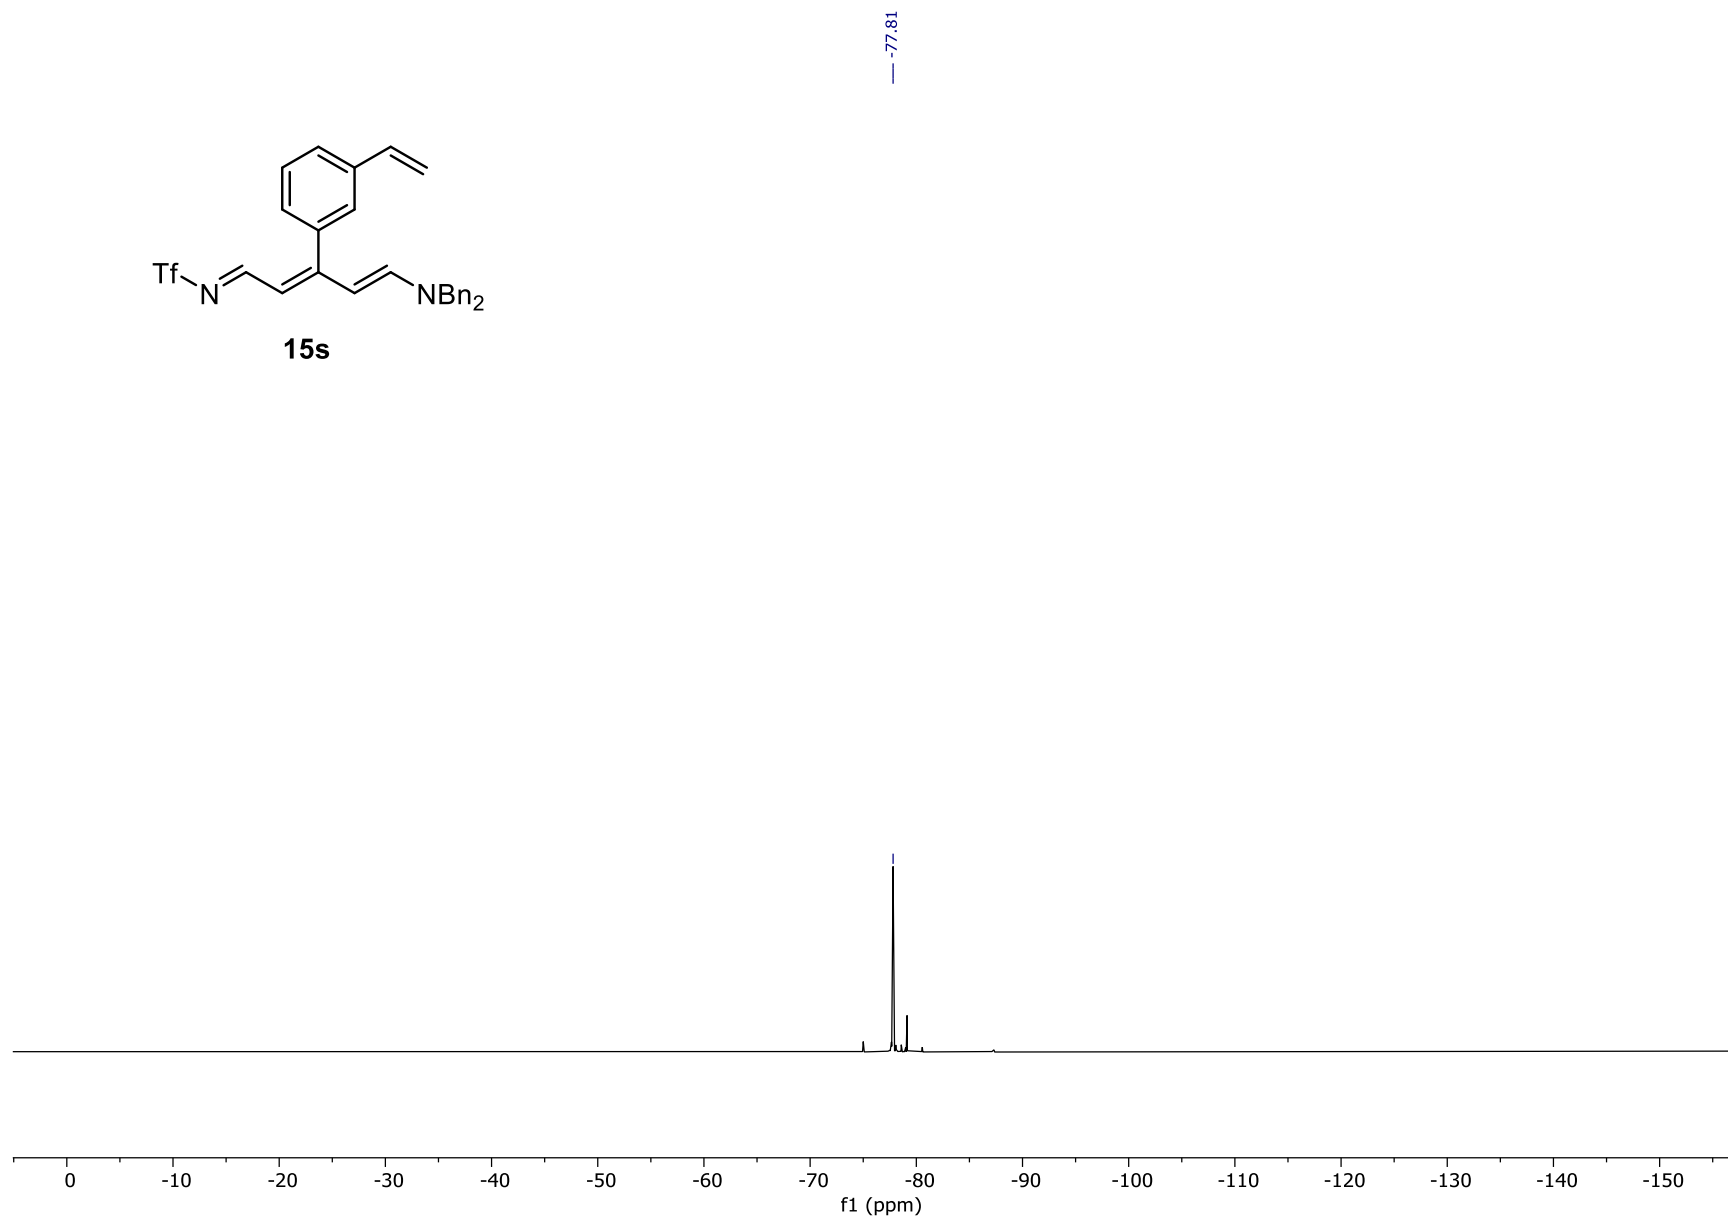

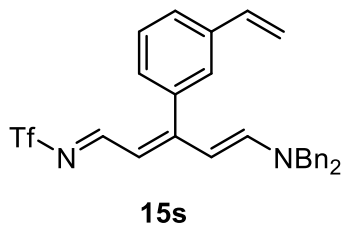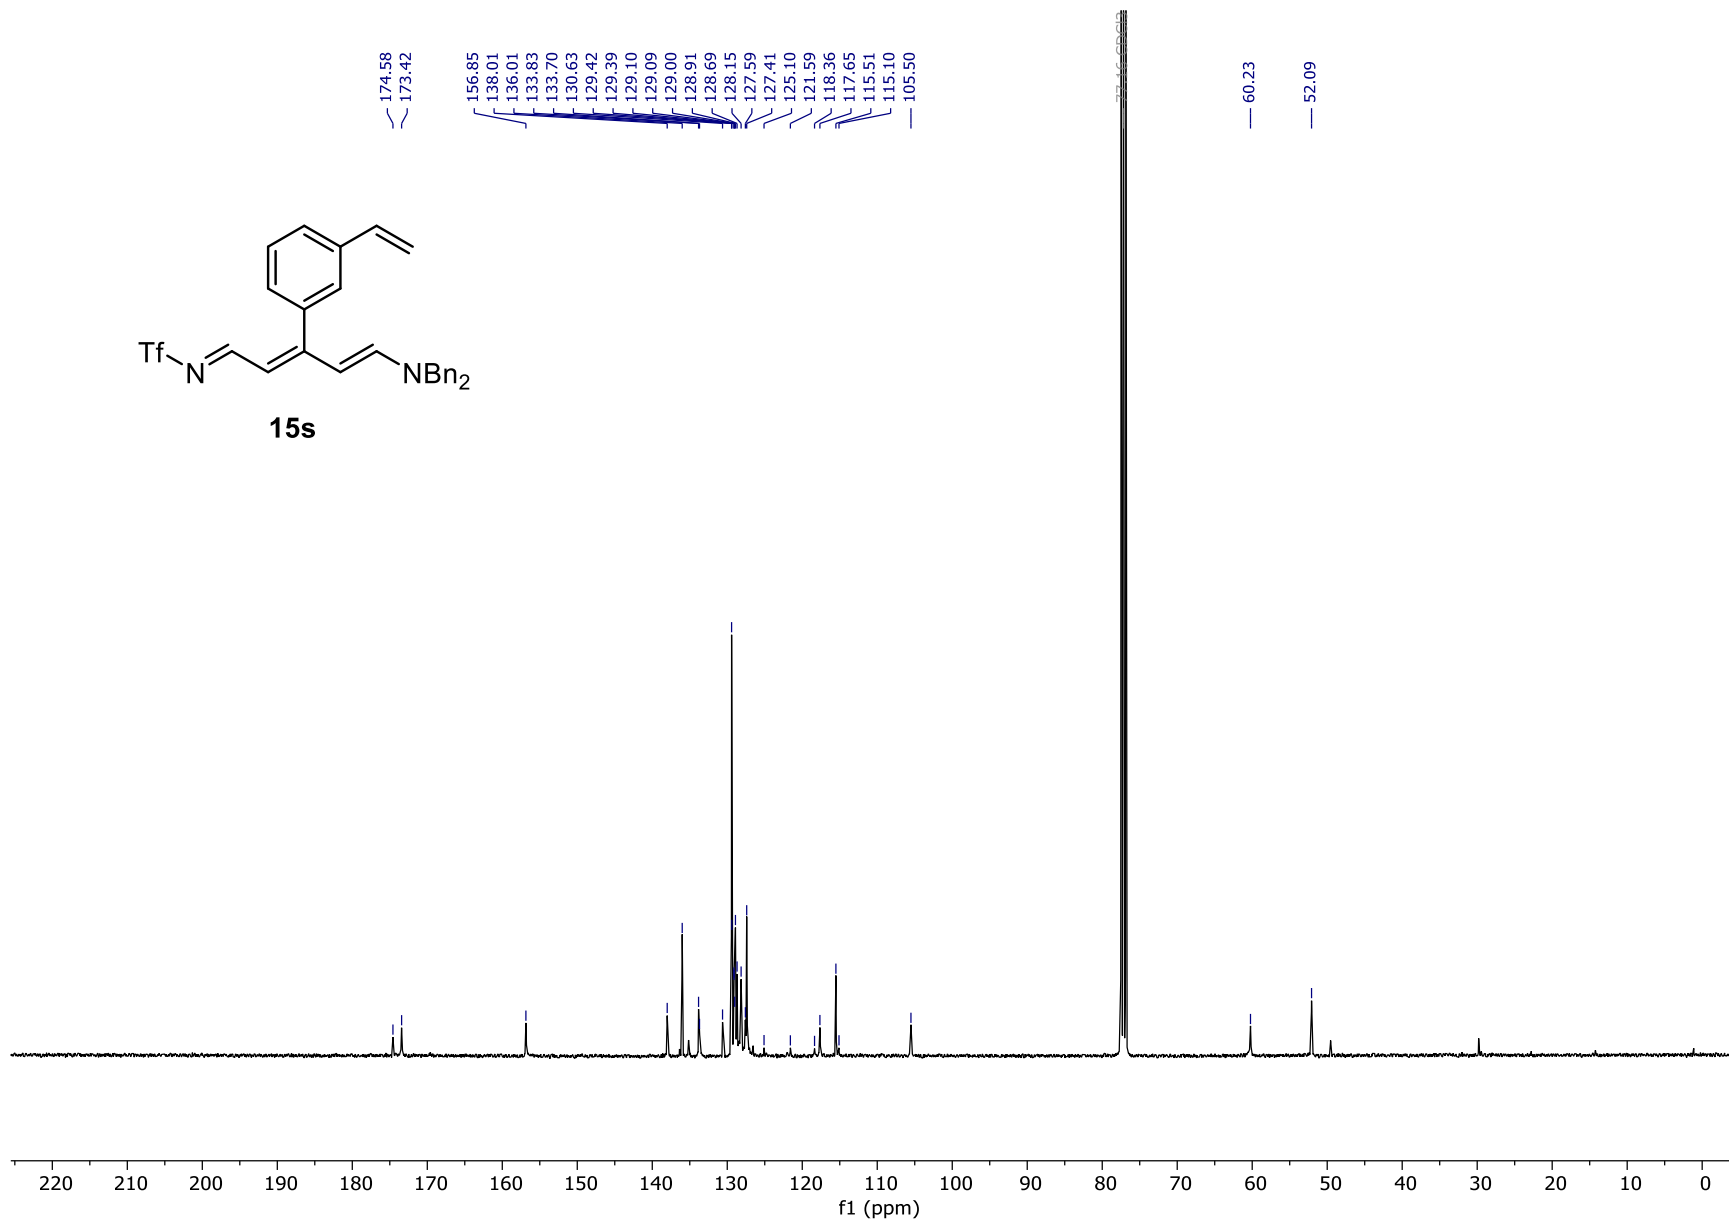

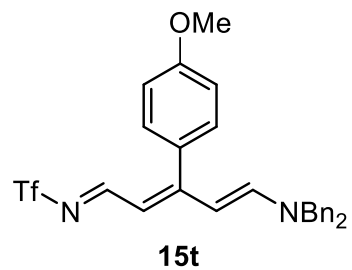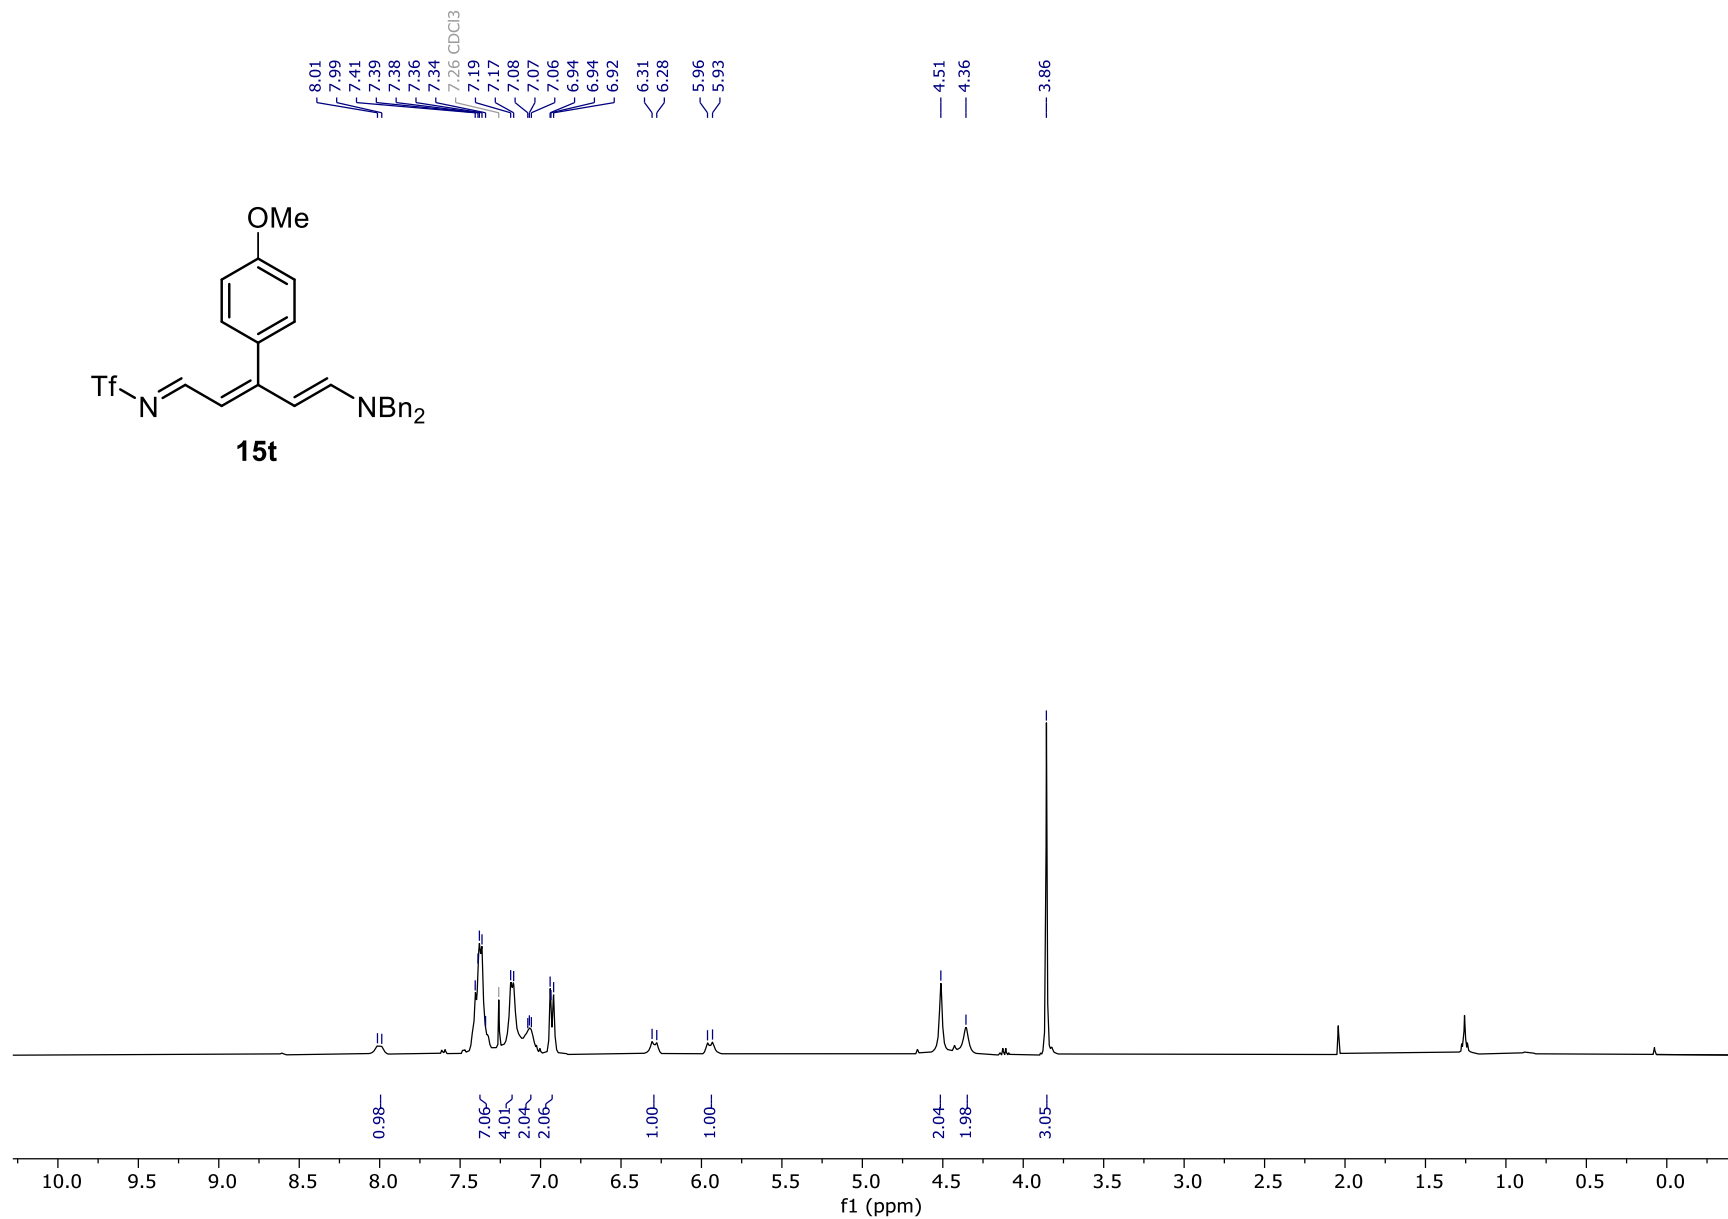

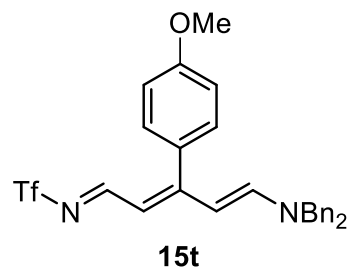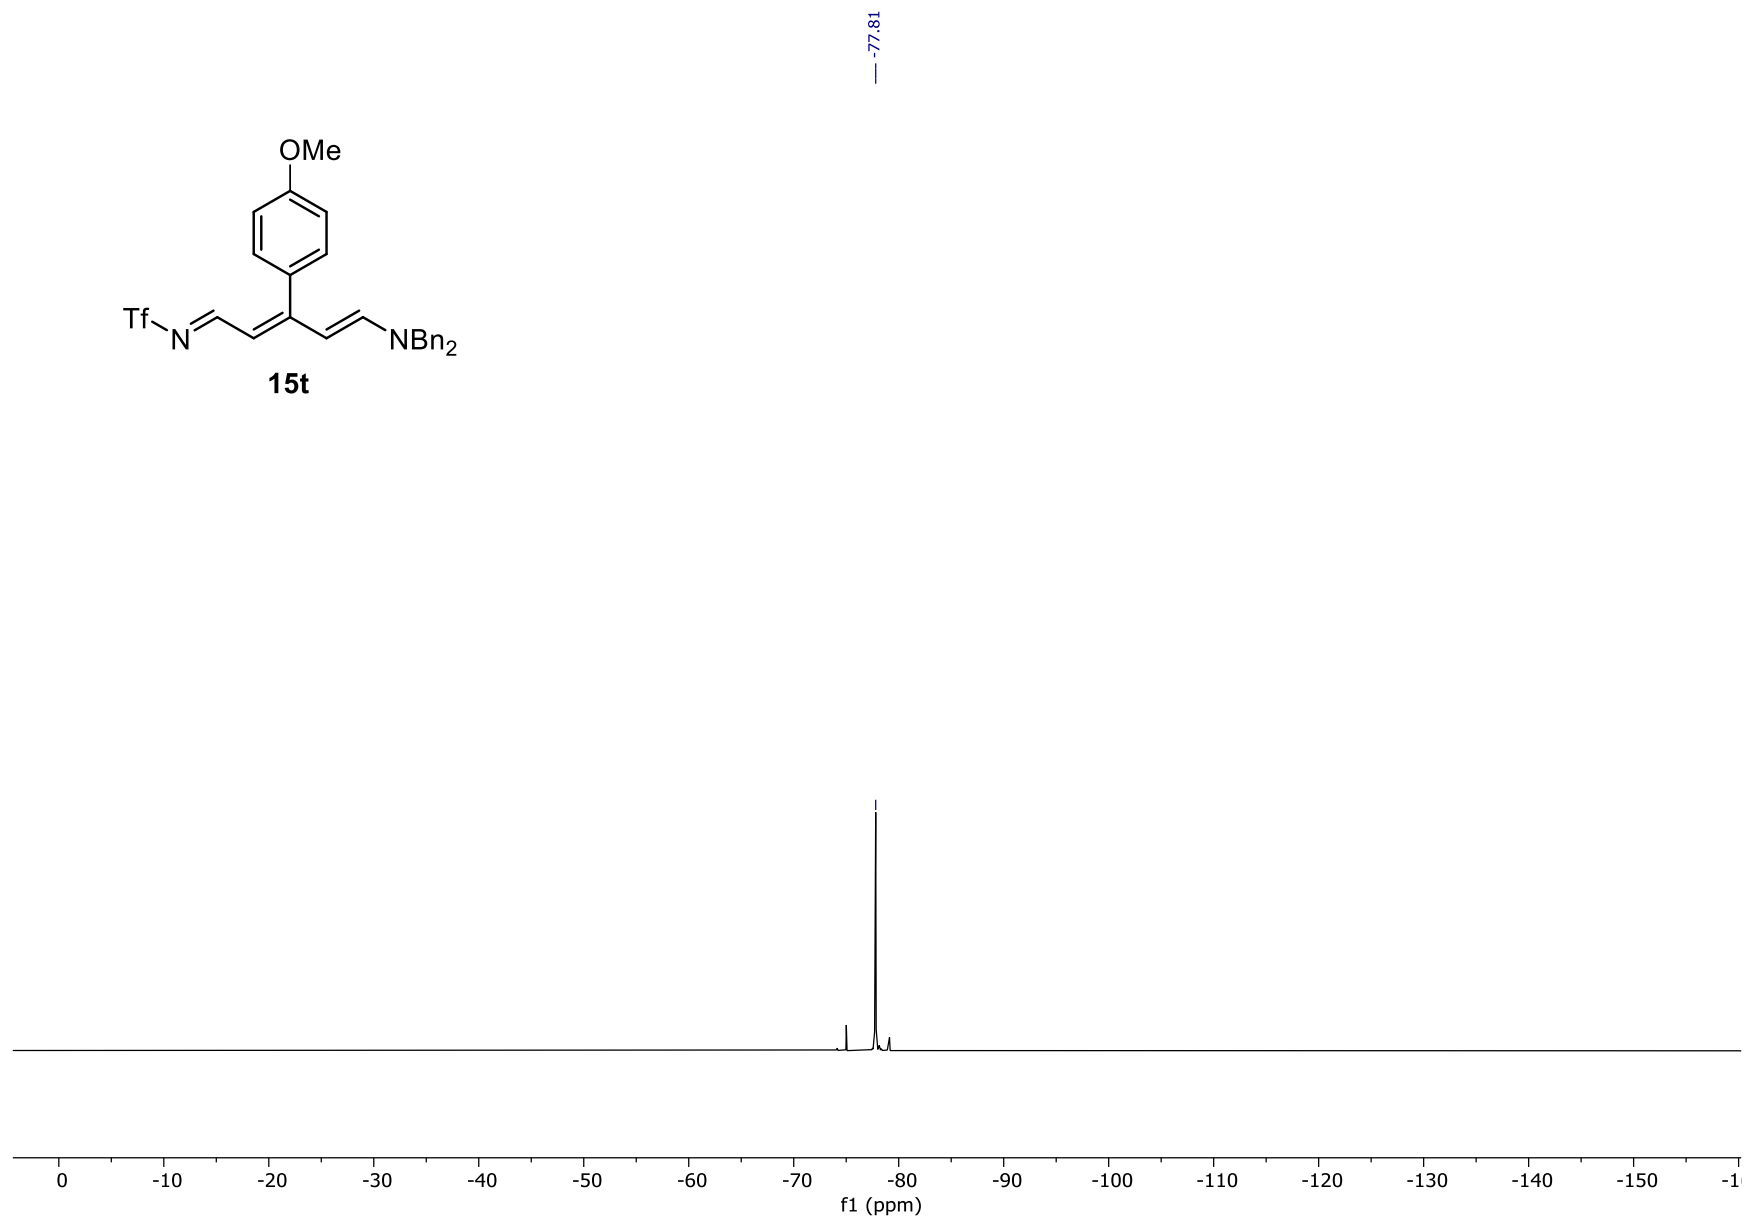

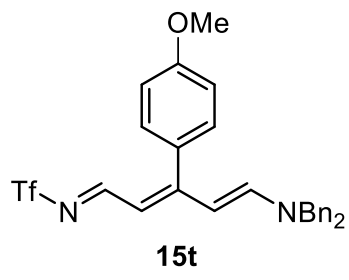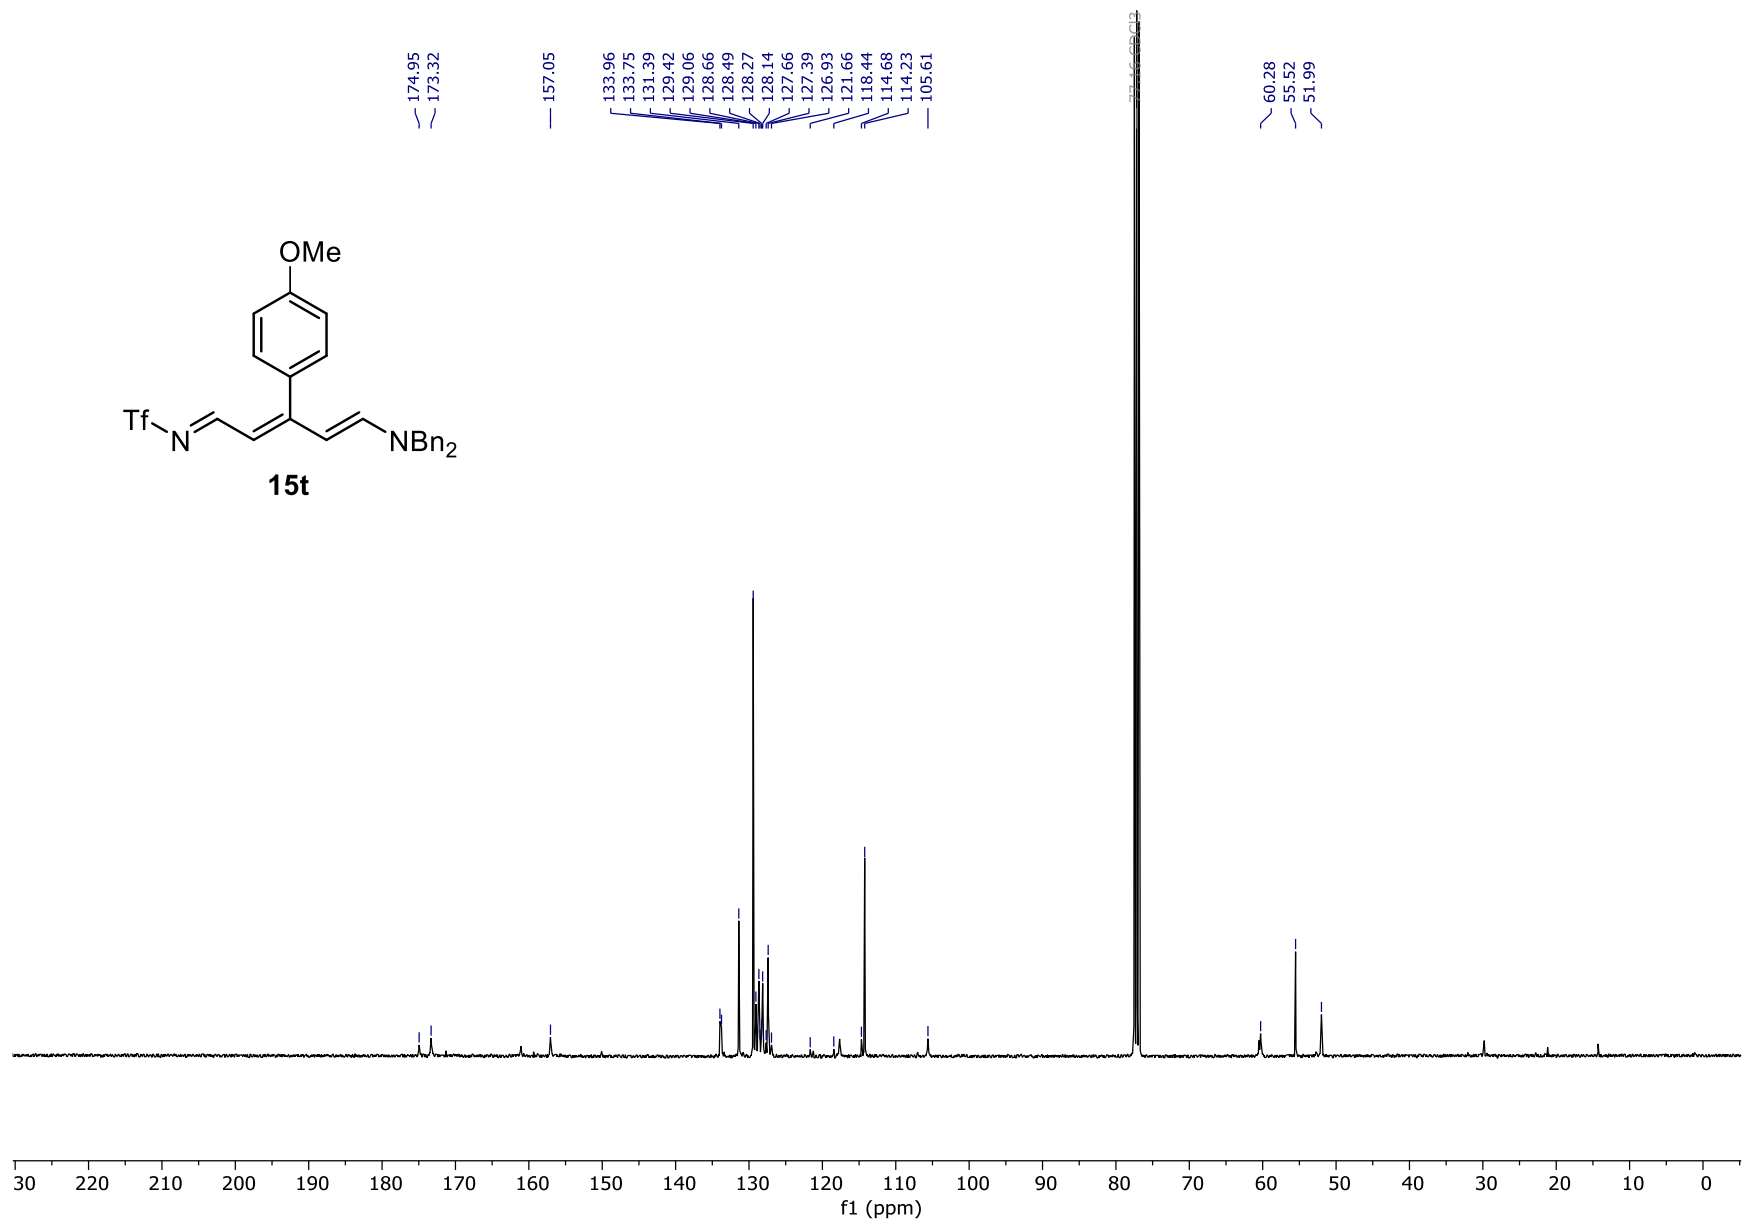

8.01  
7.98  
7.90  
7.89  
7.87  
7.86  
7.85  
7.84  
7.71  
7.61  
7.60  
7.59  
7.58  
7.57  
7.55  
7.44  
7.42  
7.41  
7.40  
7.38  
7.37  
7.36  
7.35  
7.34  
7.33  
7.32  
7.32  
7.26 CDCl<sub>3</sub>  
7.20  
7.18  
6.99  
6.98  
6.41  
6.38  
6.06  
6.02

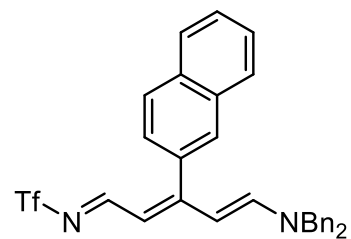

**15u**

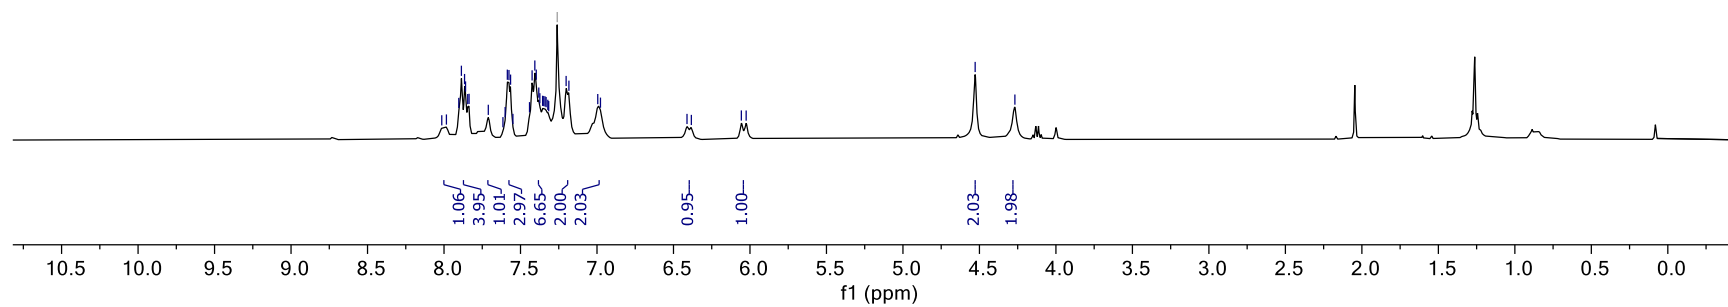

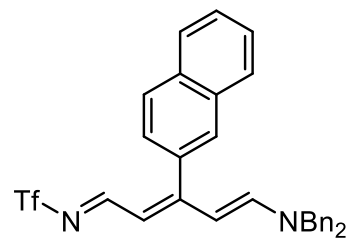

15u

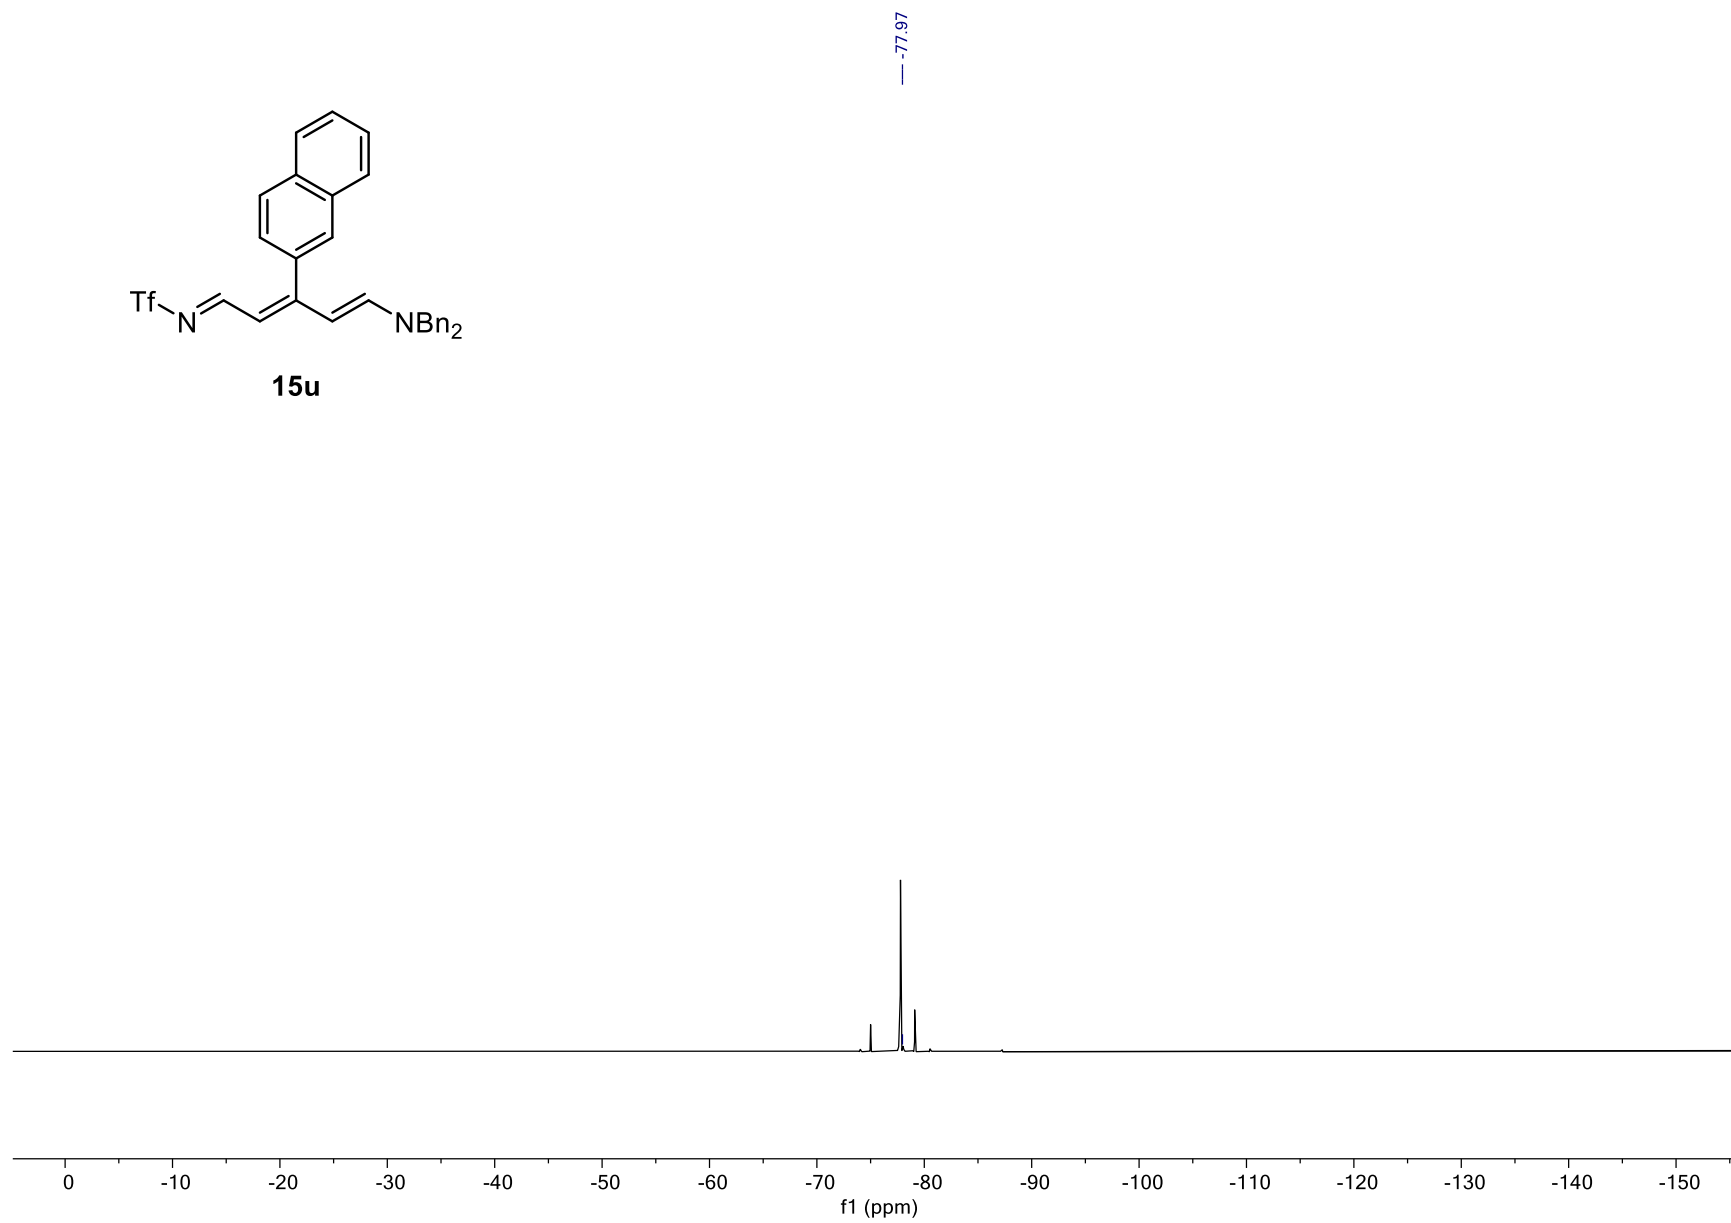

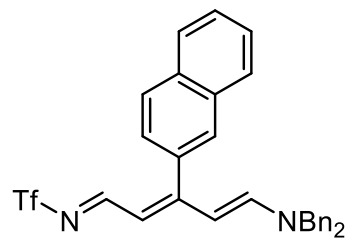

**15u**

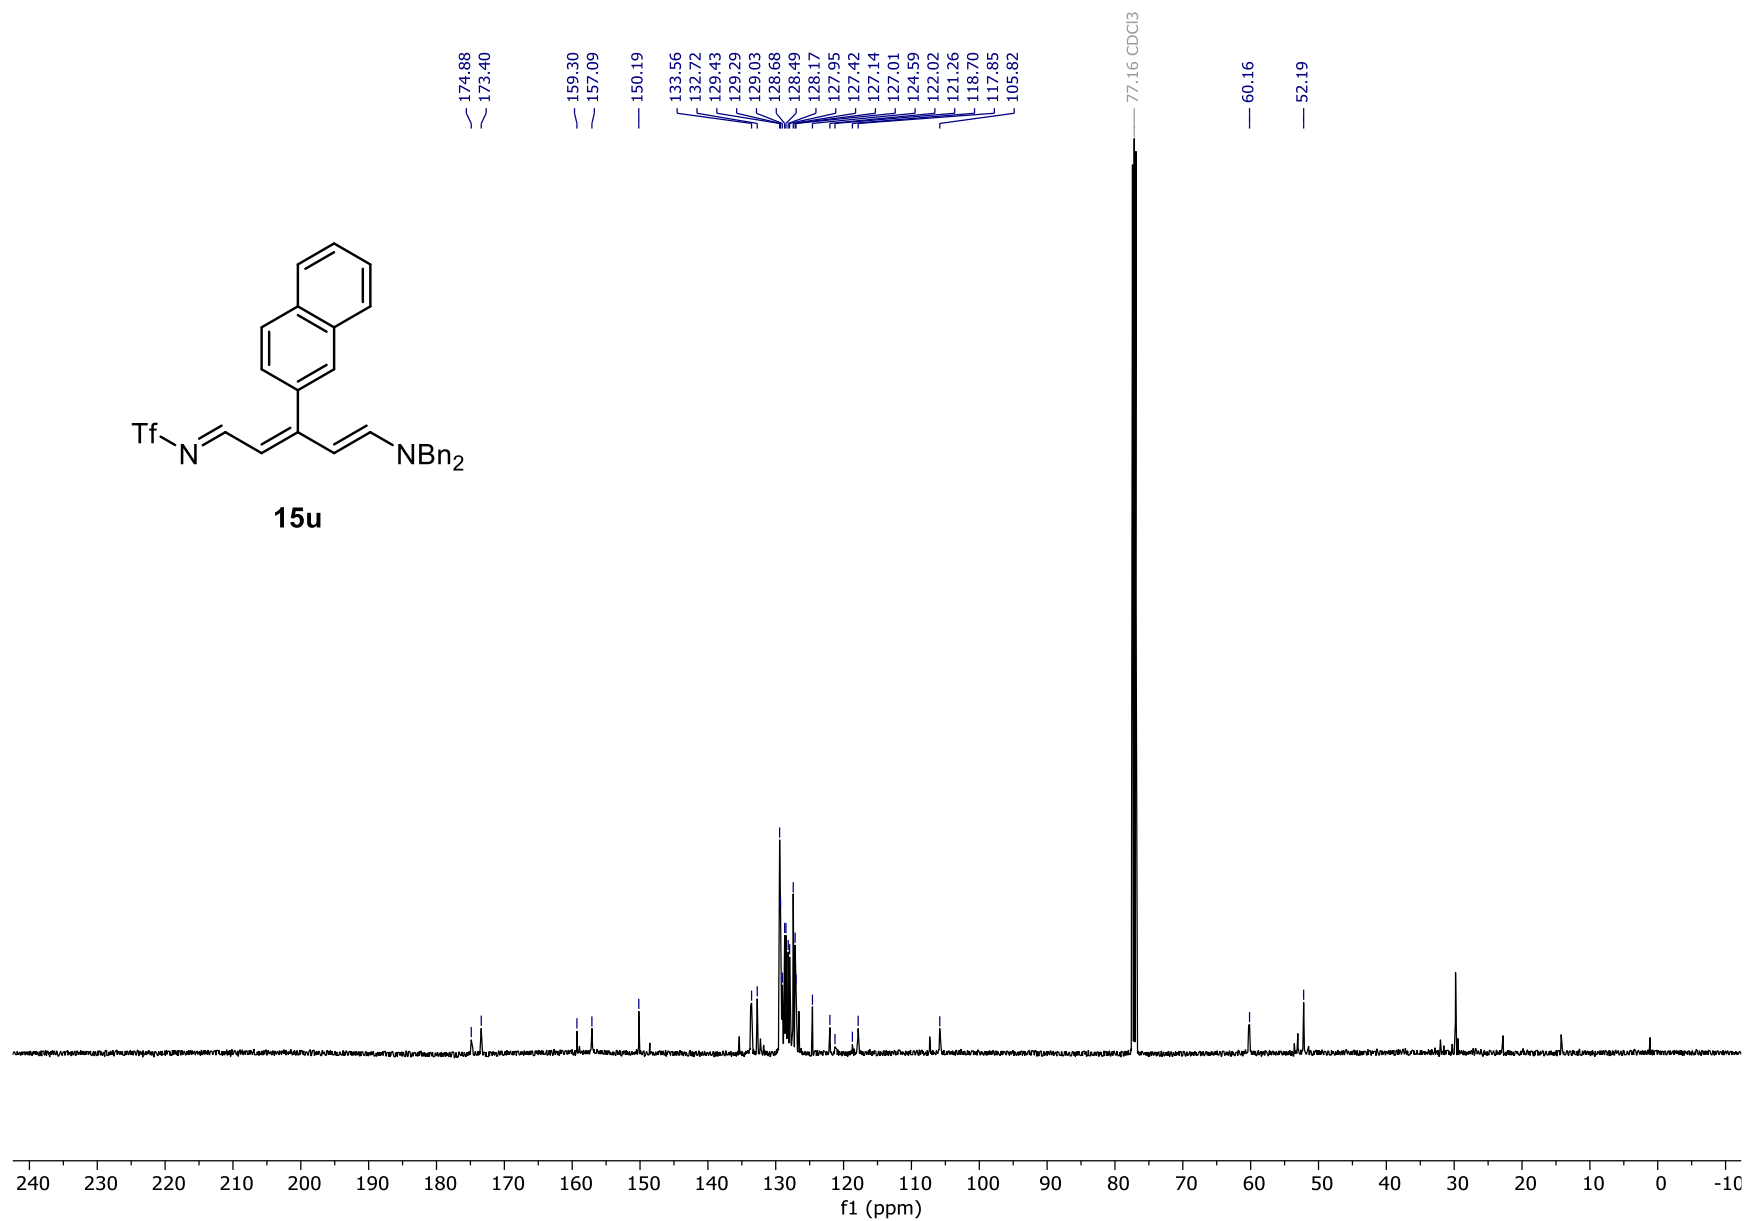

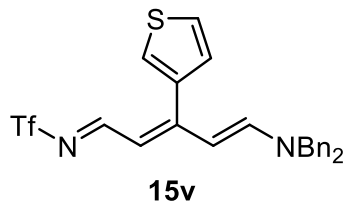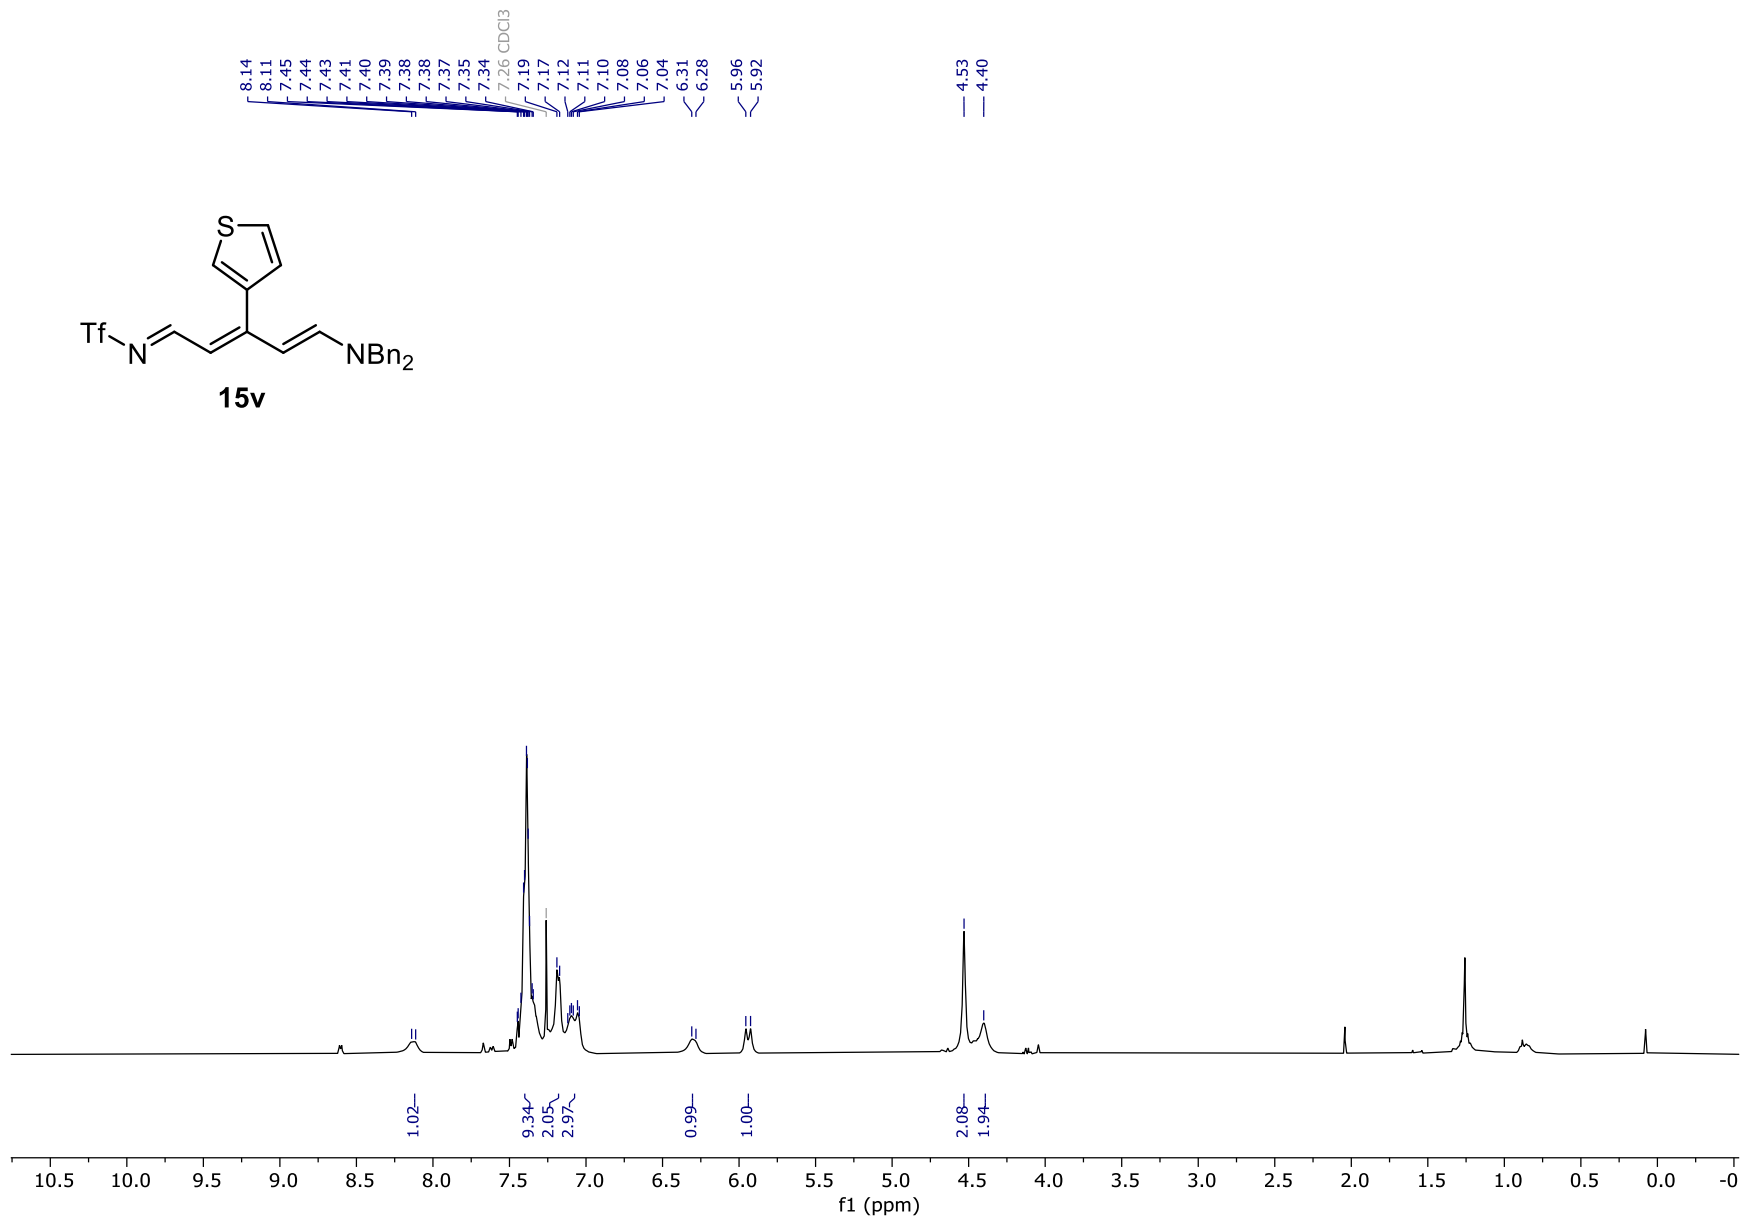

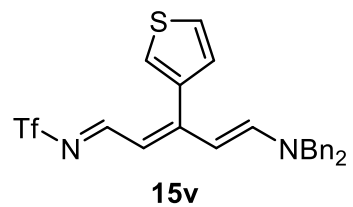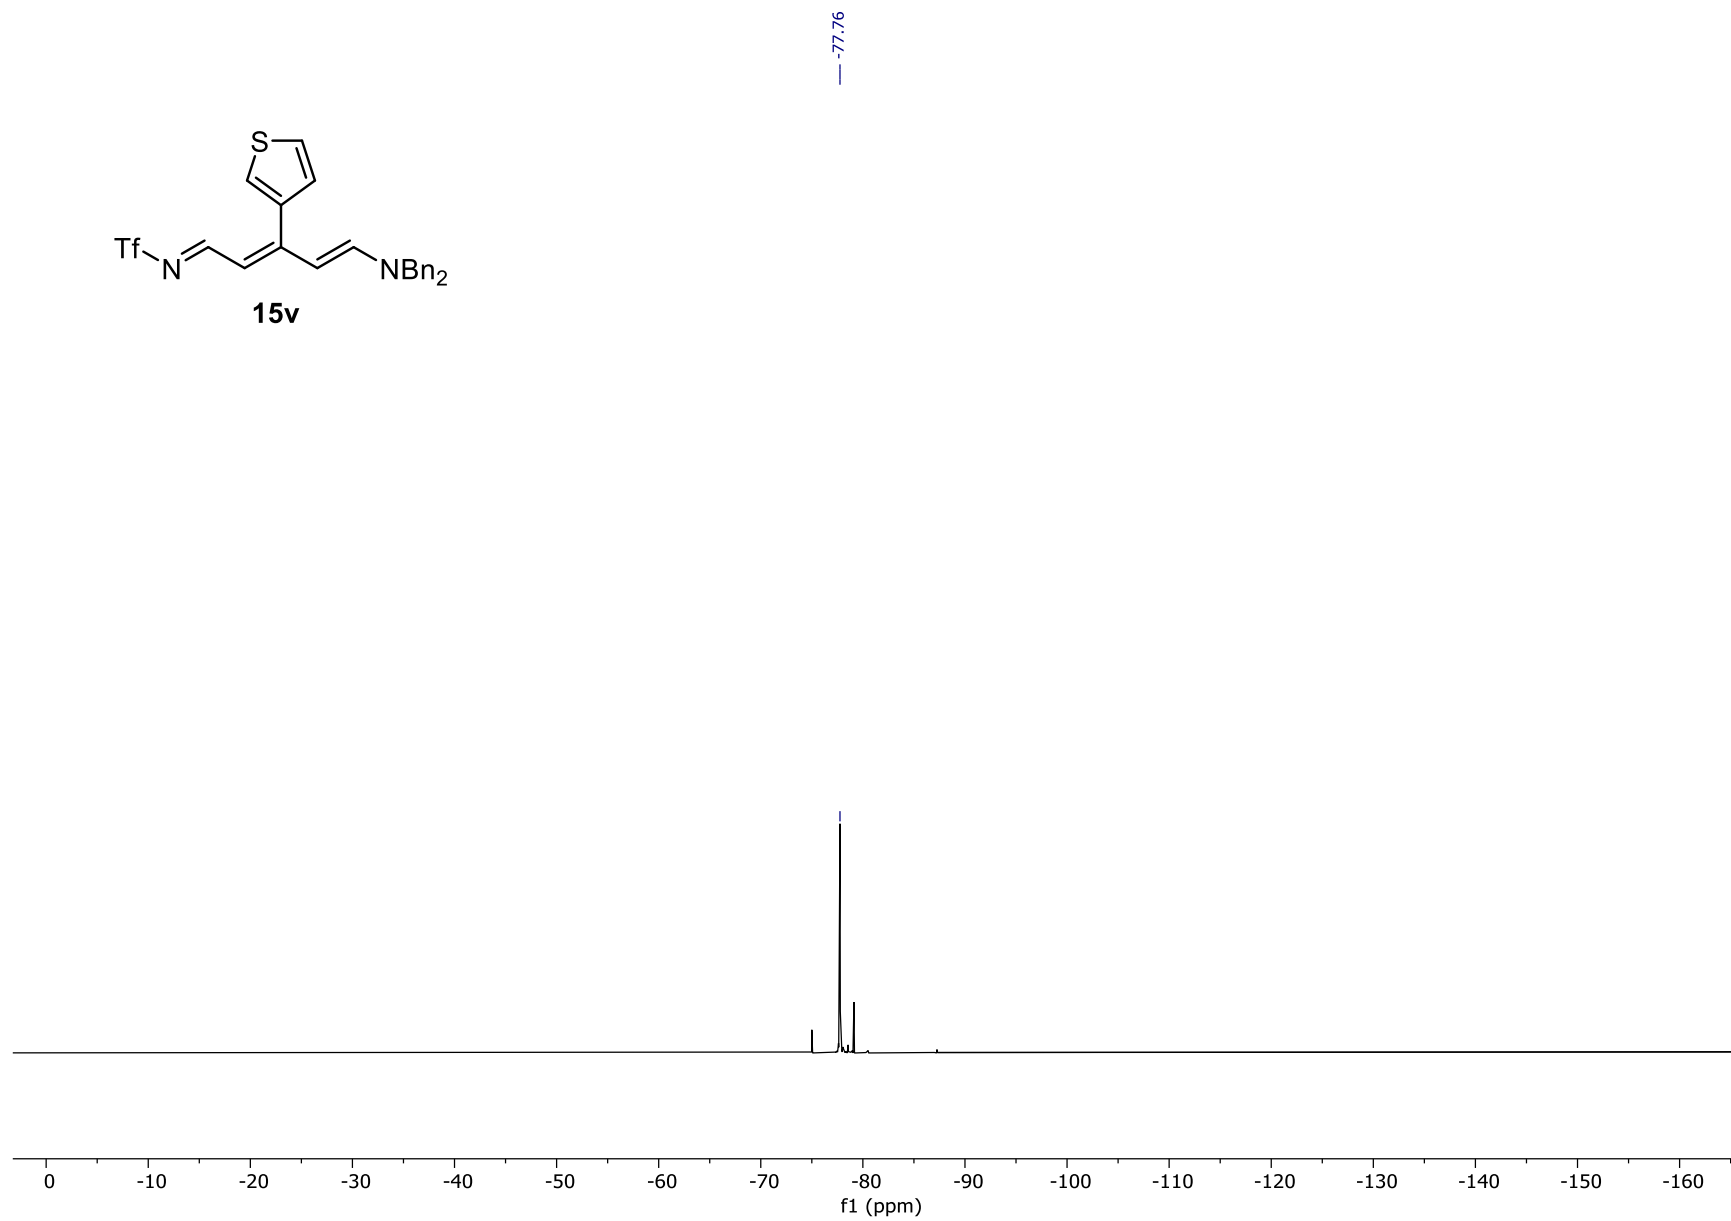

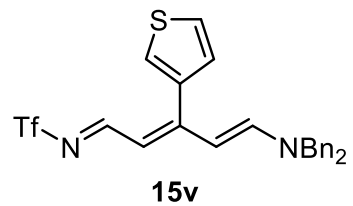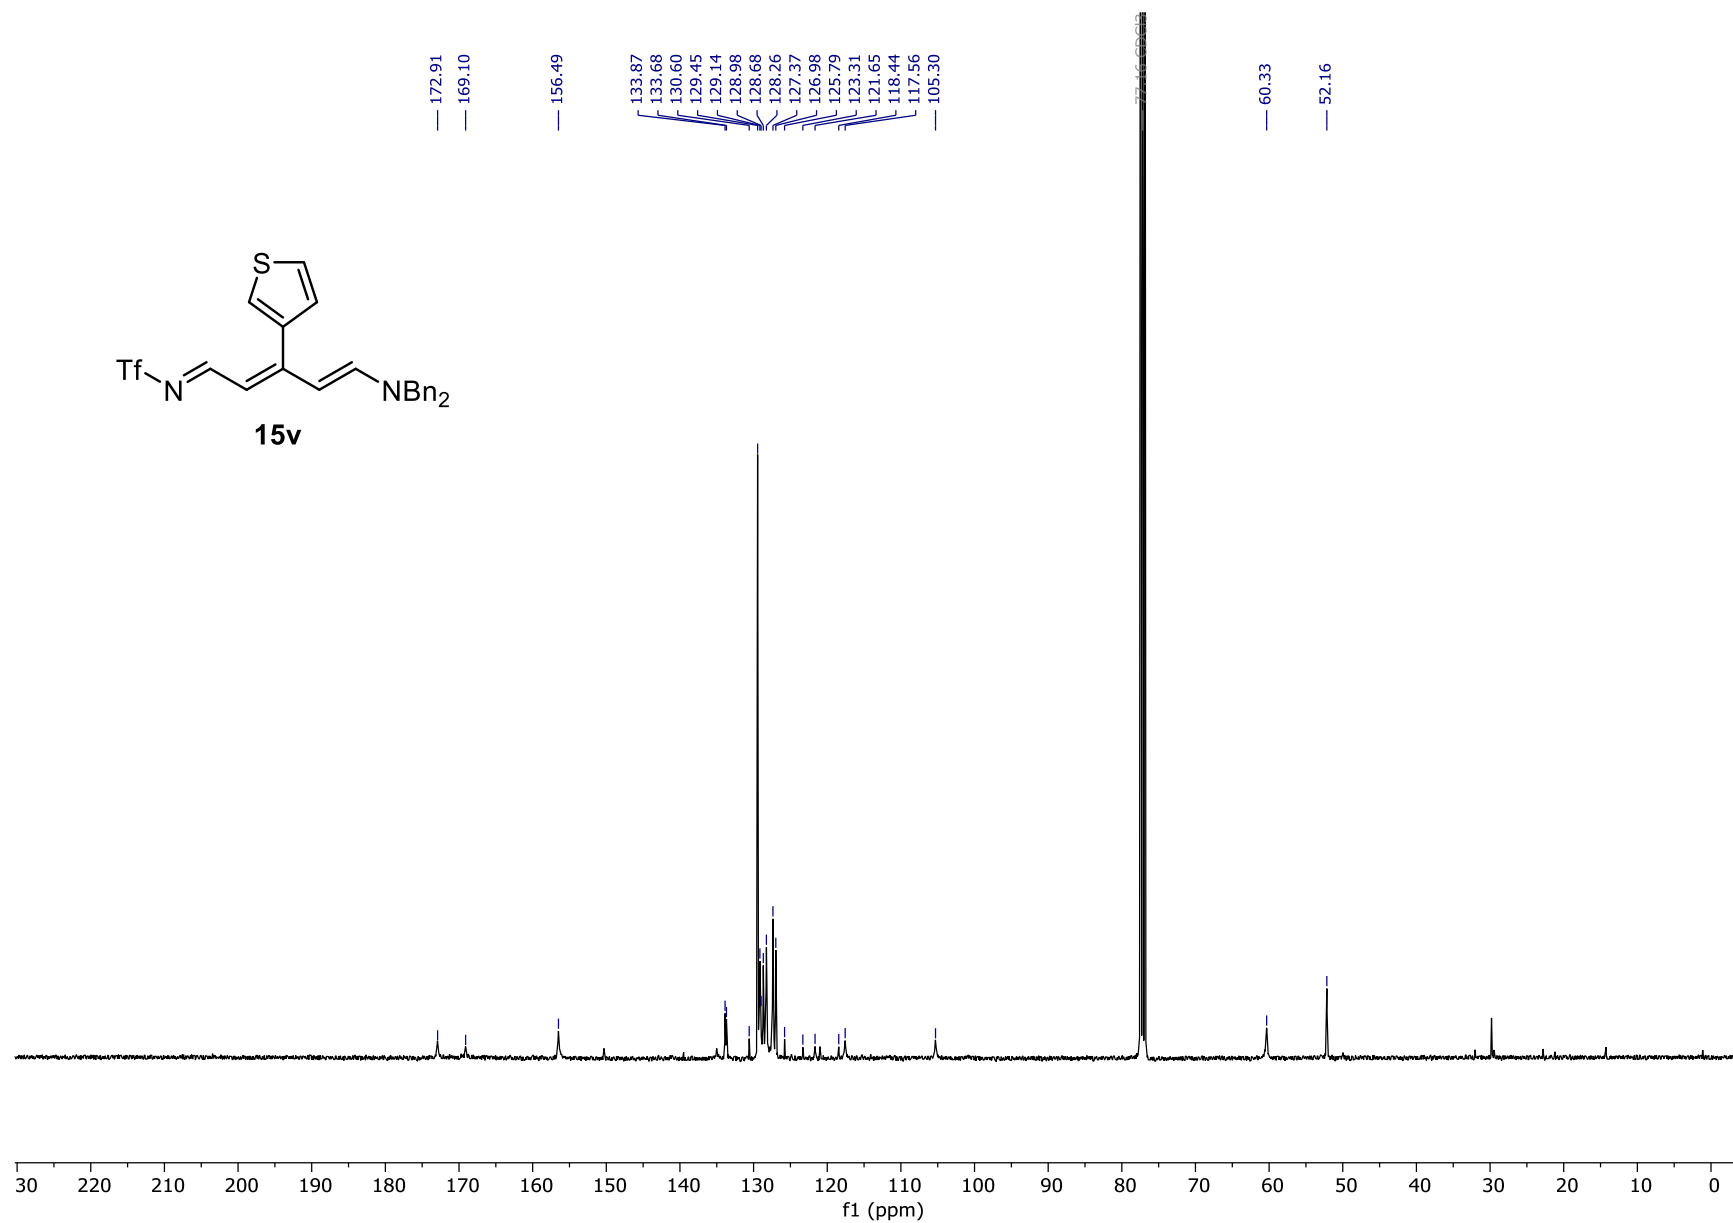

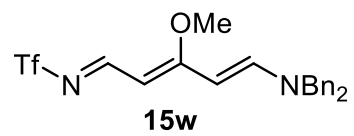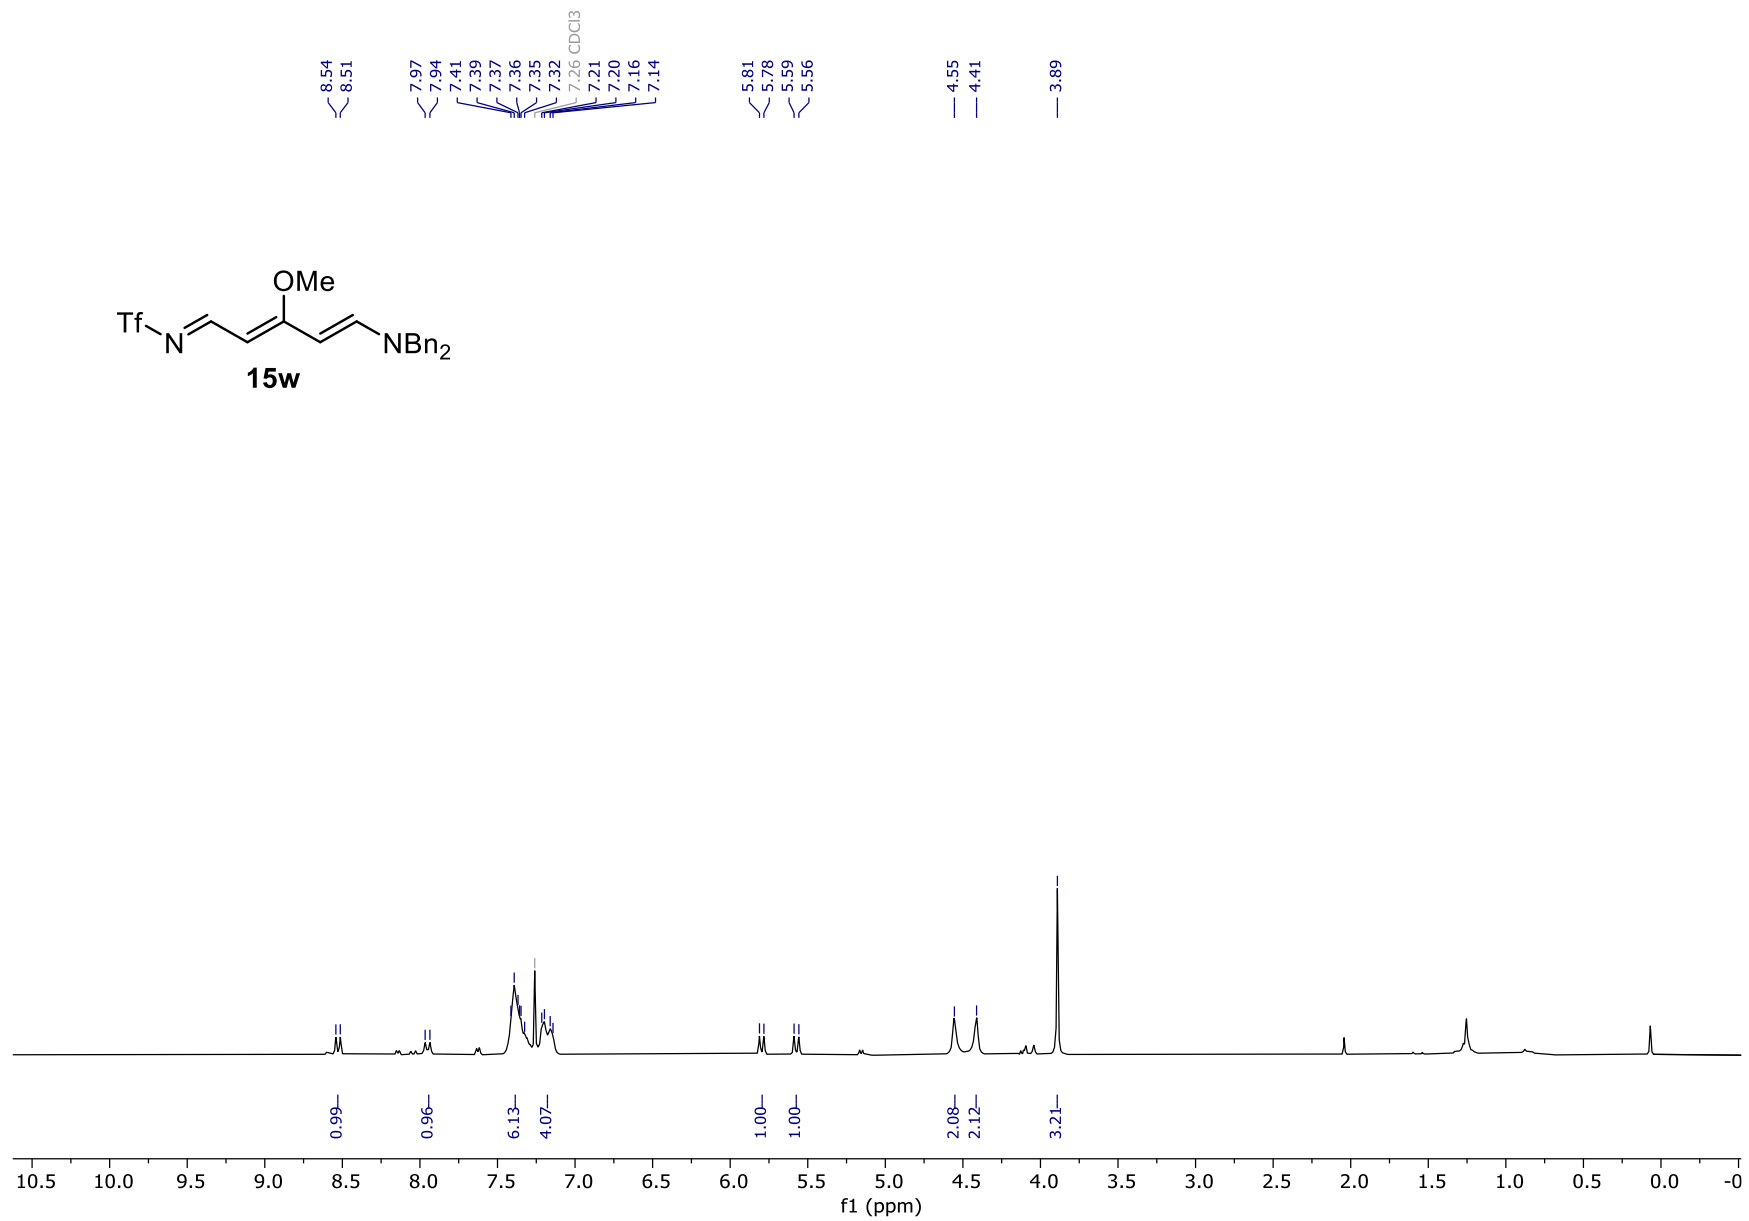

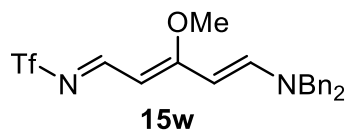

-77.88

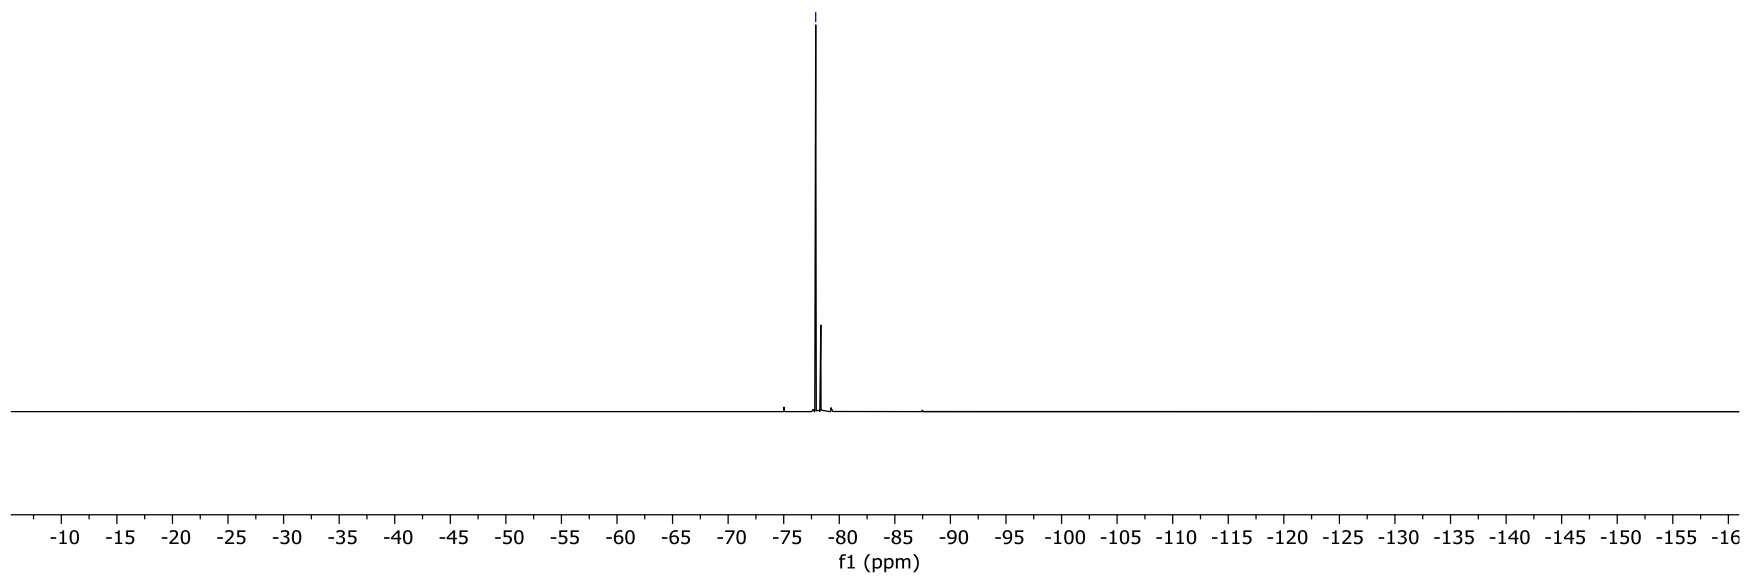

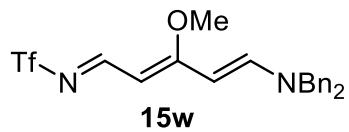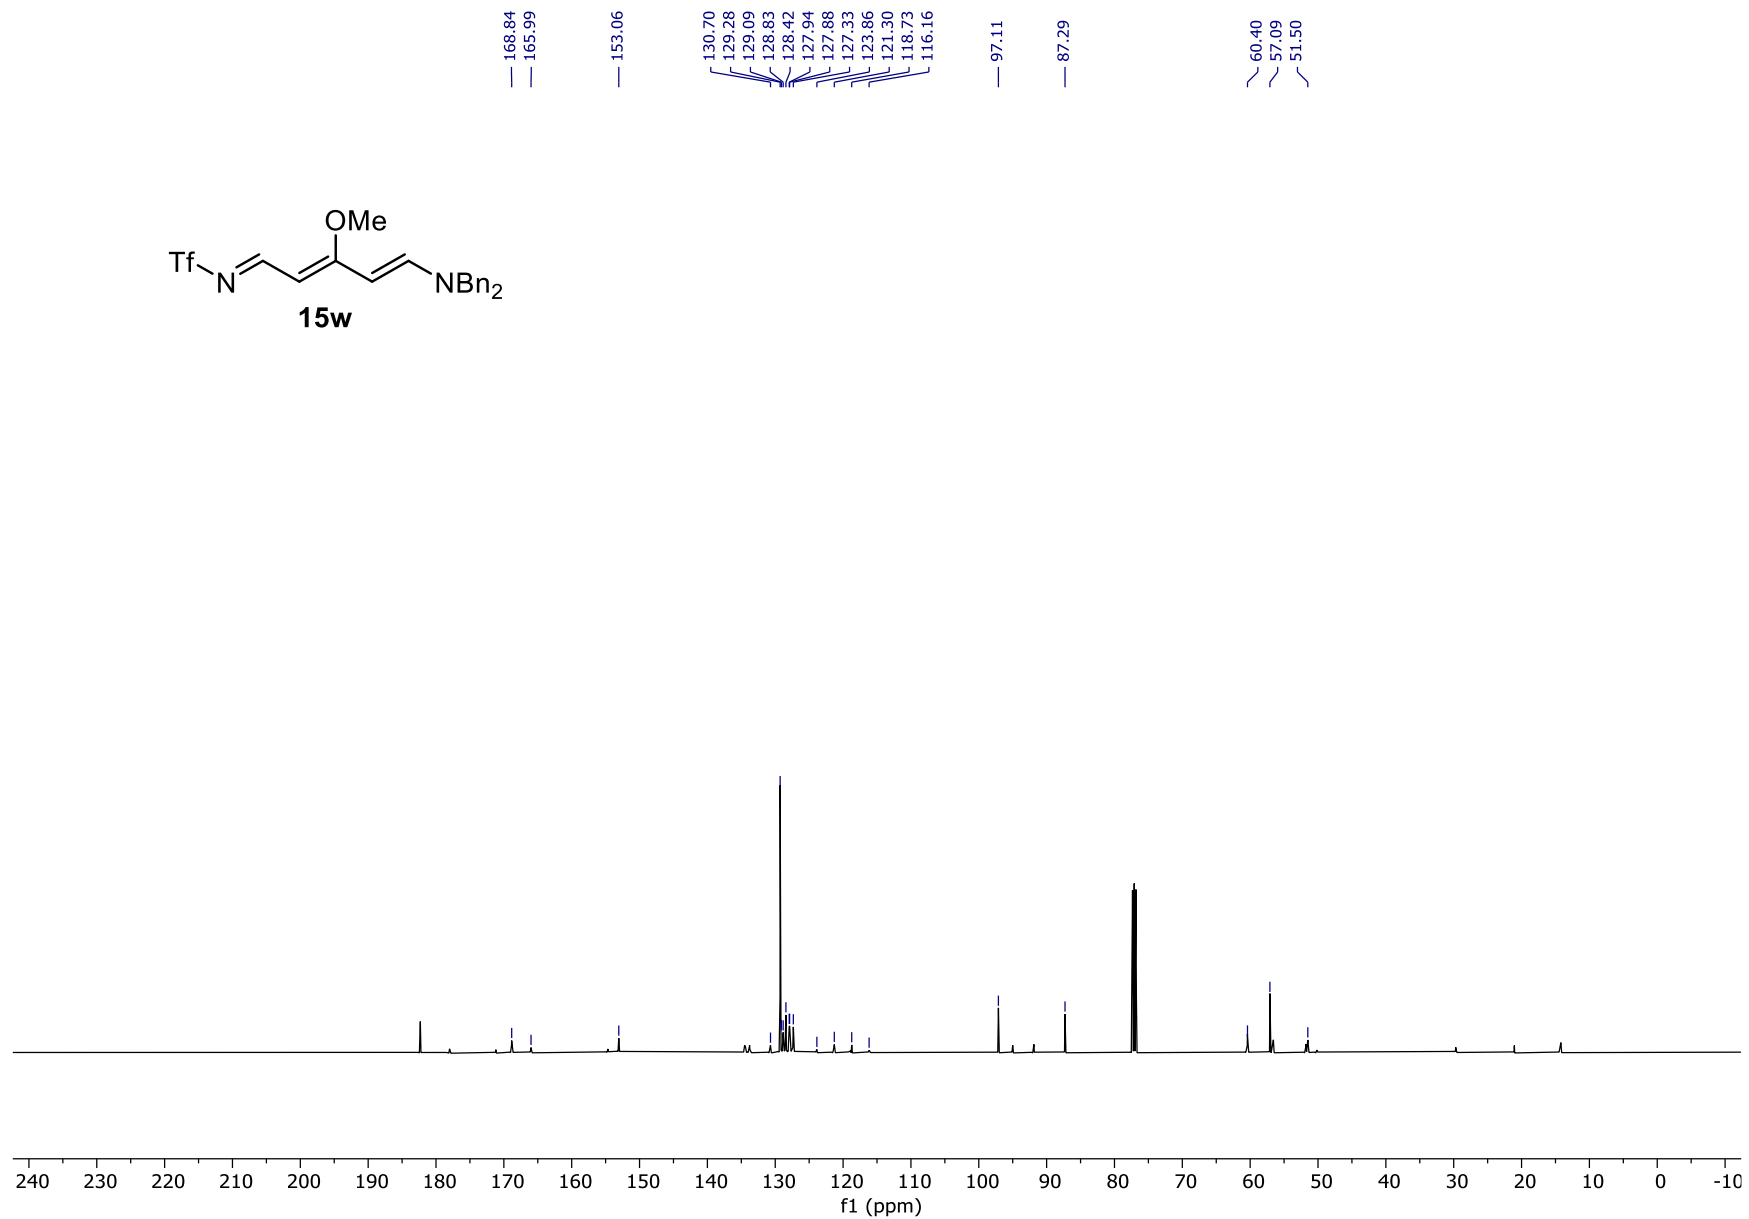

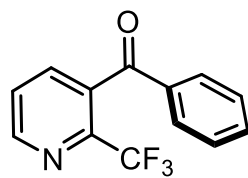

17a

8.85  
8.84  
7.79  
7.77  
7.77  
7.75  
7.74  
7.73  
7.65  
7.63  
7.62  
7.61  
7.61  
7.60  
7.59  
7.49  
7.48  
7.46  
7.26 CDCl<sub>3</sub>

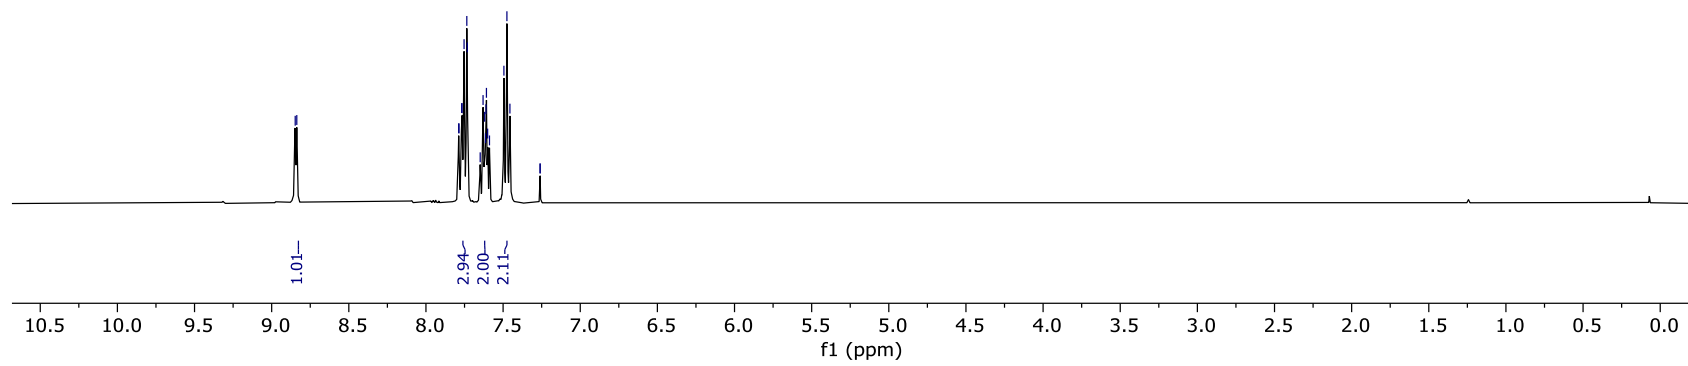

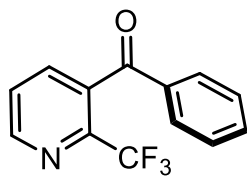

17a

-63.27

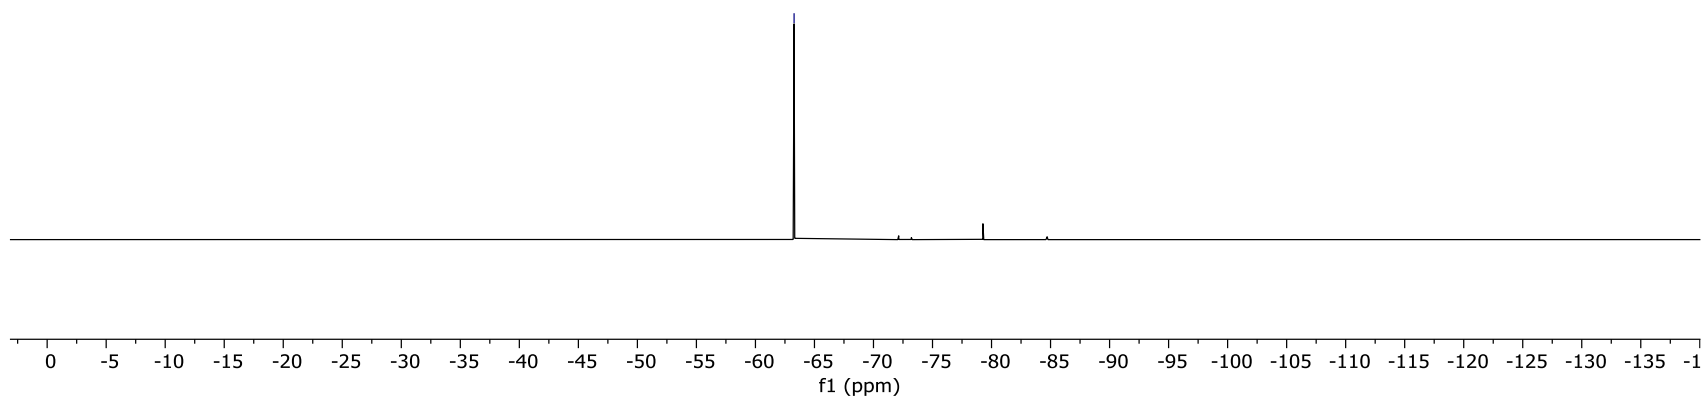

— 193.44

150.36  
145.38  
145.03  
144.68  
144.34  
136.68  
135.87  
134.54  
130.14  
128.94  
125.95  
125.40  
122.66  
119.92  
117.18

— 77.16 CDCl<sub>3</sub>

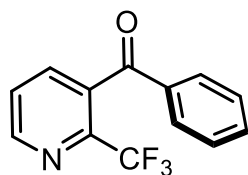

**17a**

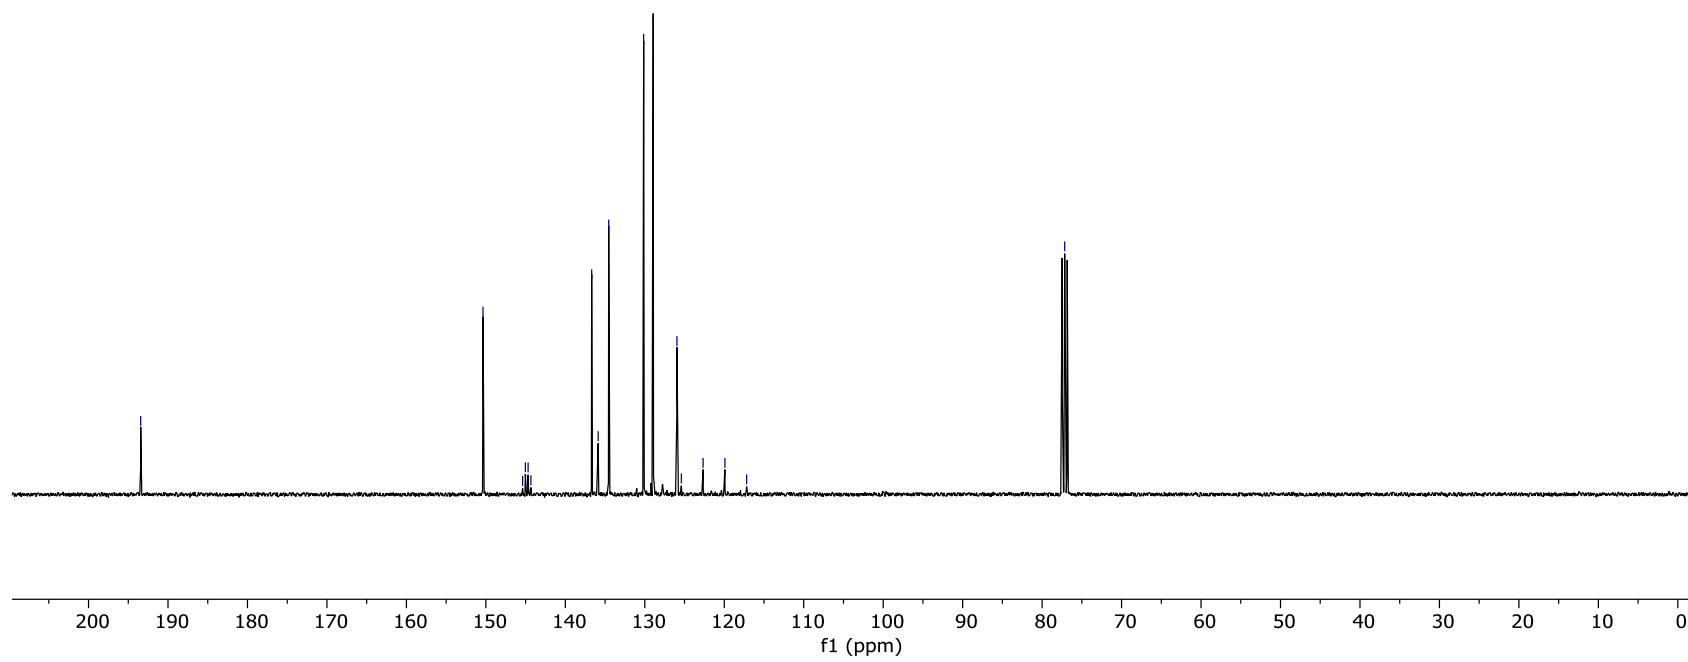

8.85  
8.84  
8.84  
8.83  
7.81  
7.80  
7.80  
7.79  
7.79  
7.78  
7.77  
7.77  
7.66  
7.66  
7.66  
7.64  
7.63  
7.63  
7.62  
7.53  
7.52  
7.52  
7.50  
7.48  
7.48  
7.26 CDCl3  
6.98  
6.84  
6.70

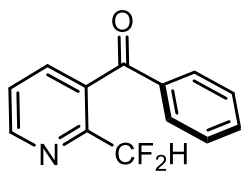

17b

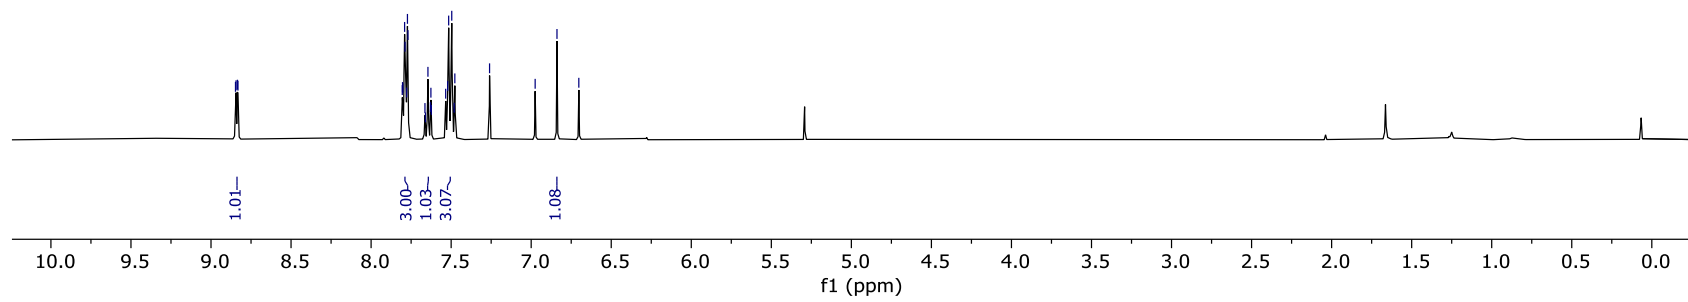

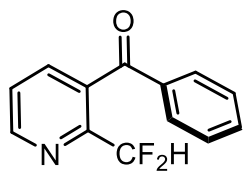

**17b**

-115.05

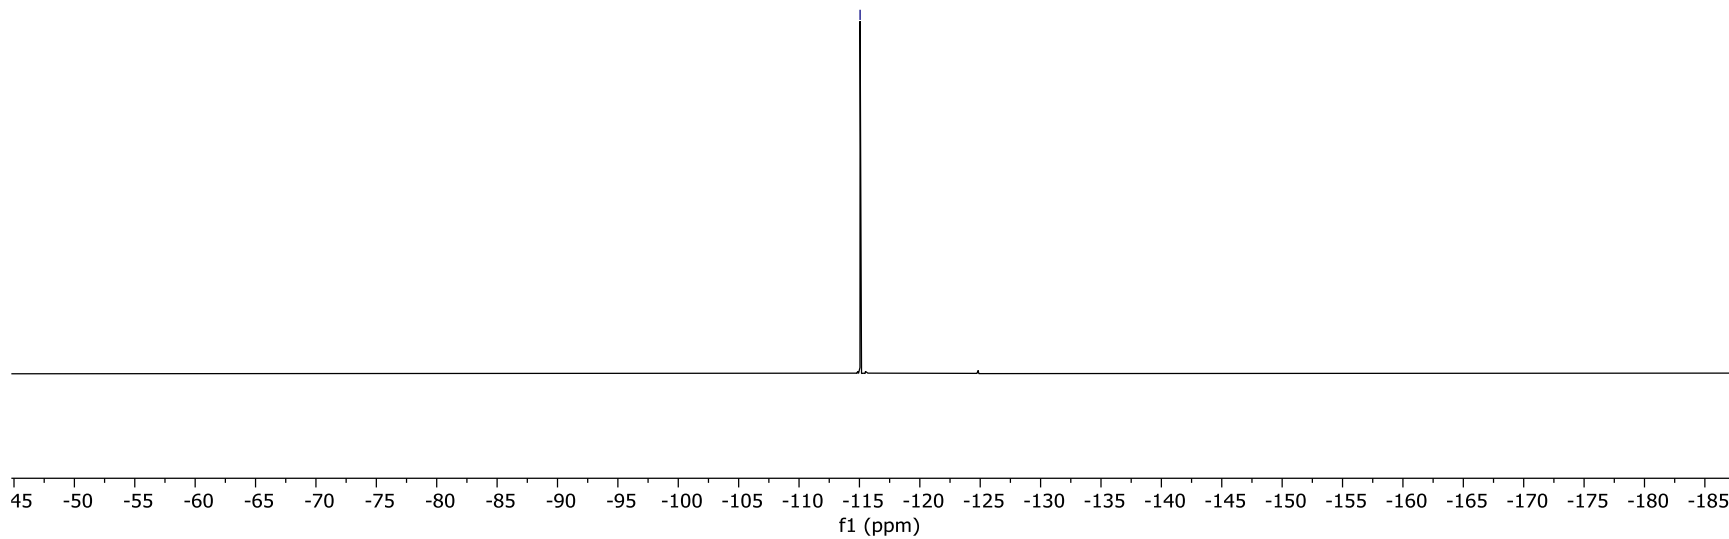

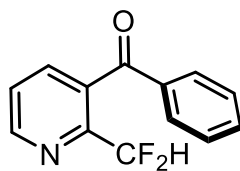

**17b**

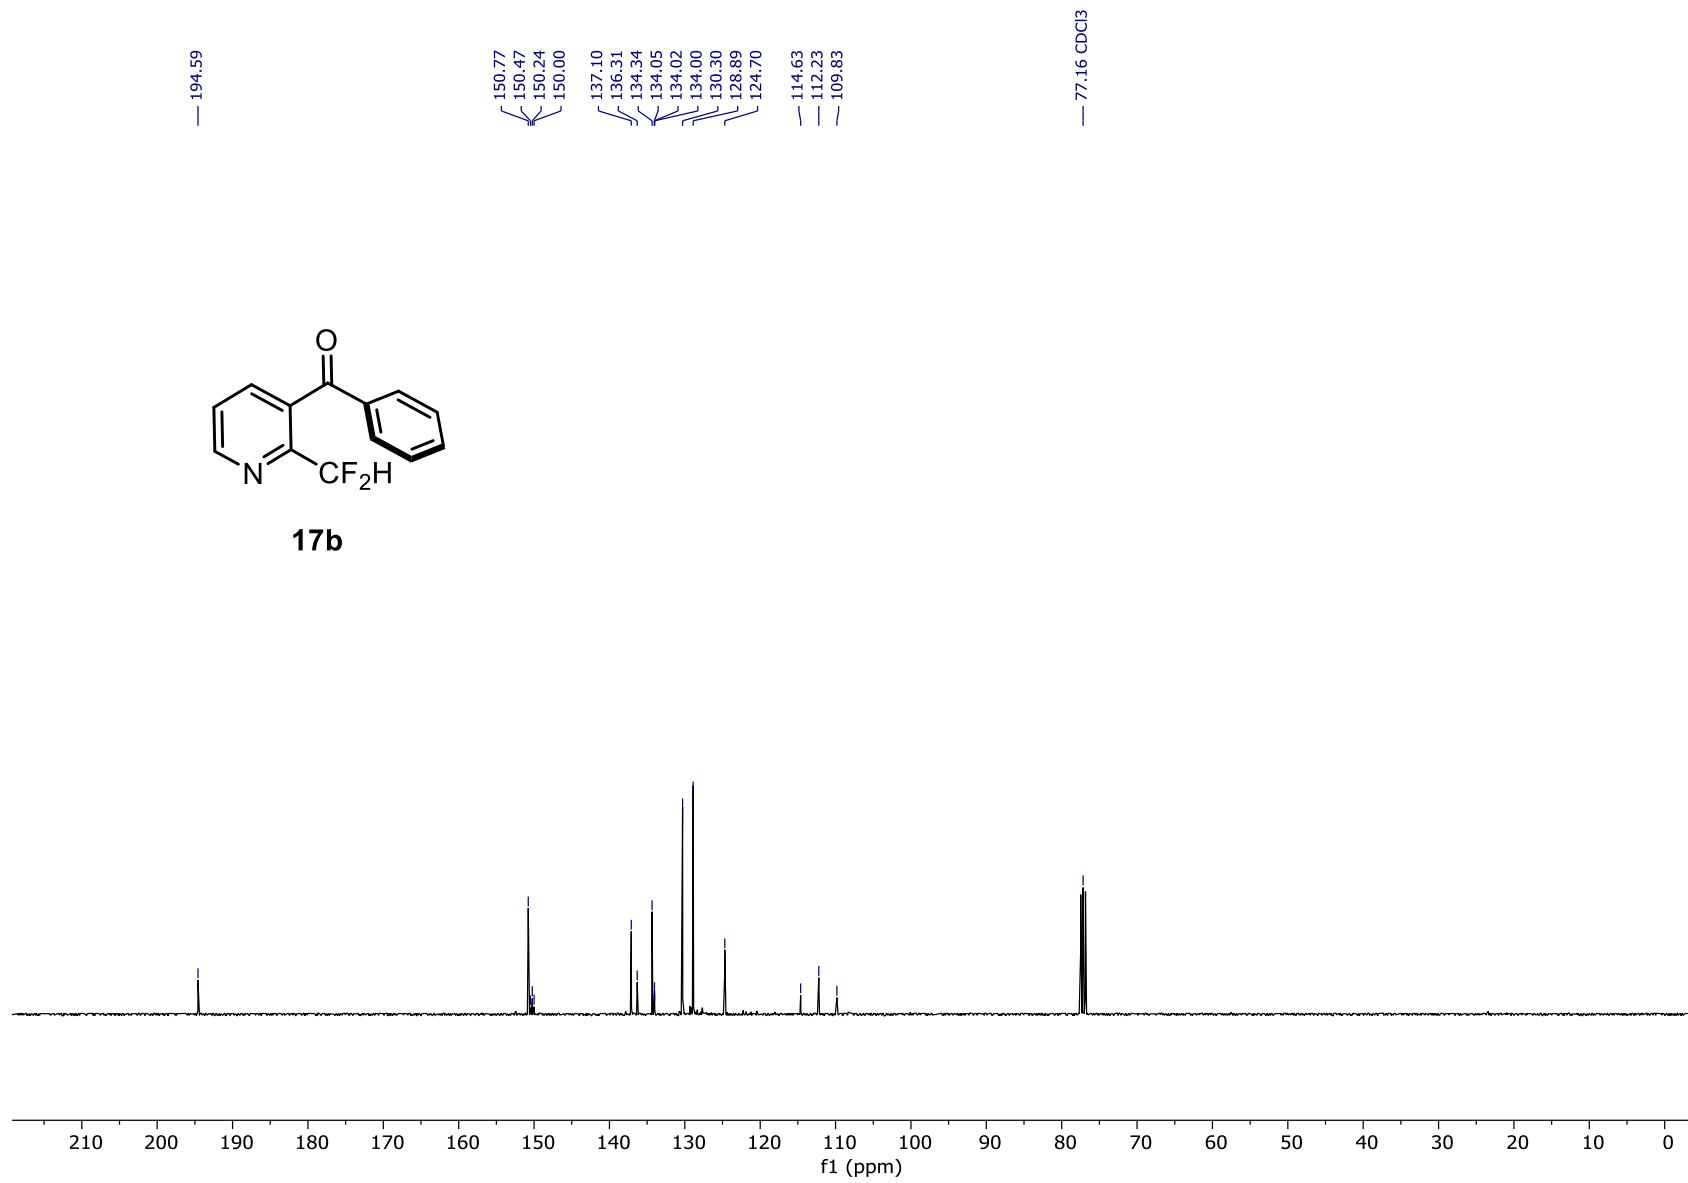

8.85  
8.84  
8.84  
8.84  
7.76  
7.74  
7.74  
7.72  
7.72  
7.65  
7.63  
7.61  
7.58  
7.56  
7.56  
7.54  
7.50  
7.48  
7.46  
7.26 CDCl<sub>3</sub>

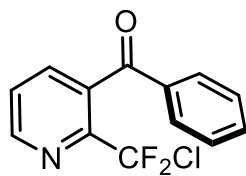

17c

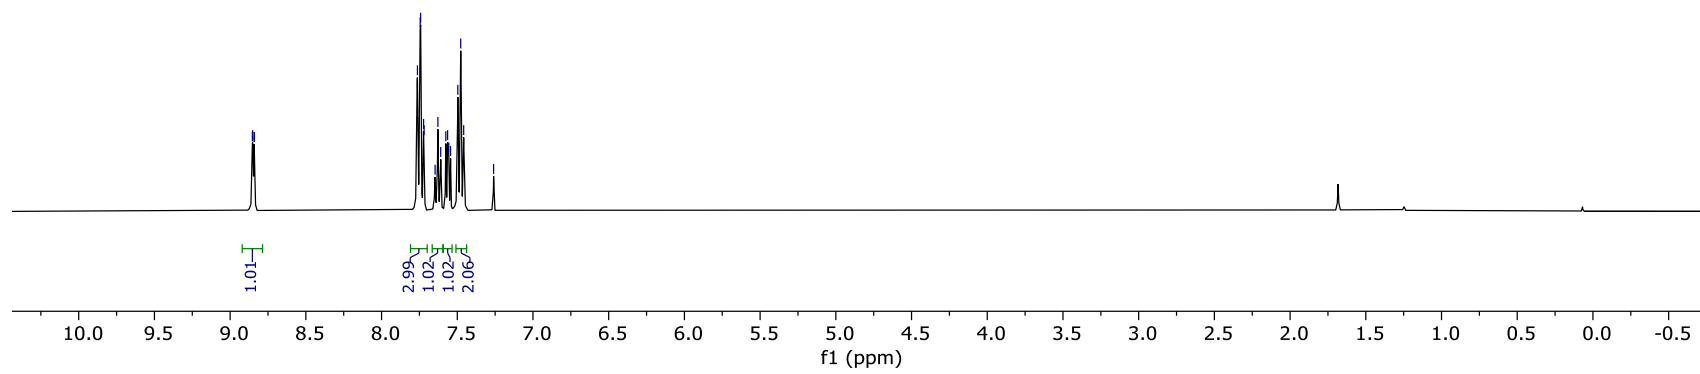

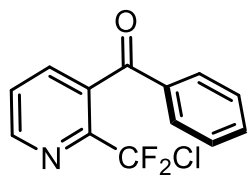

**17c**

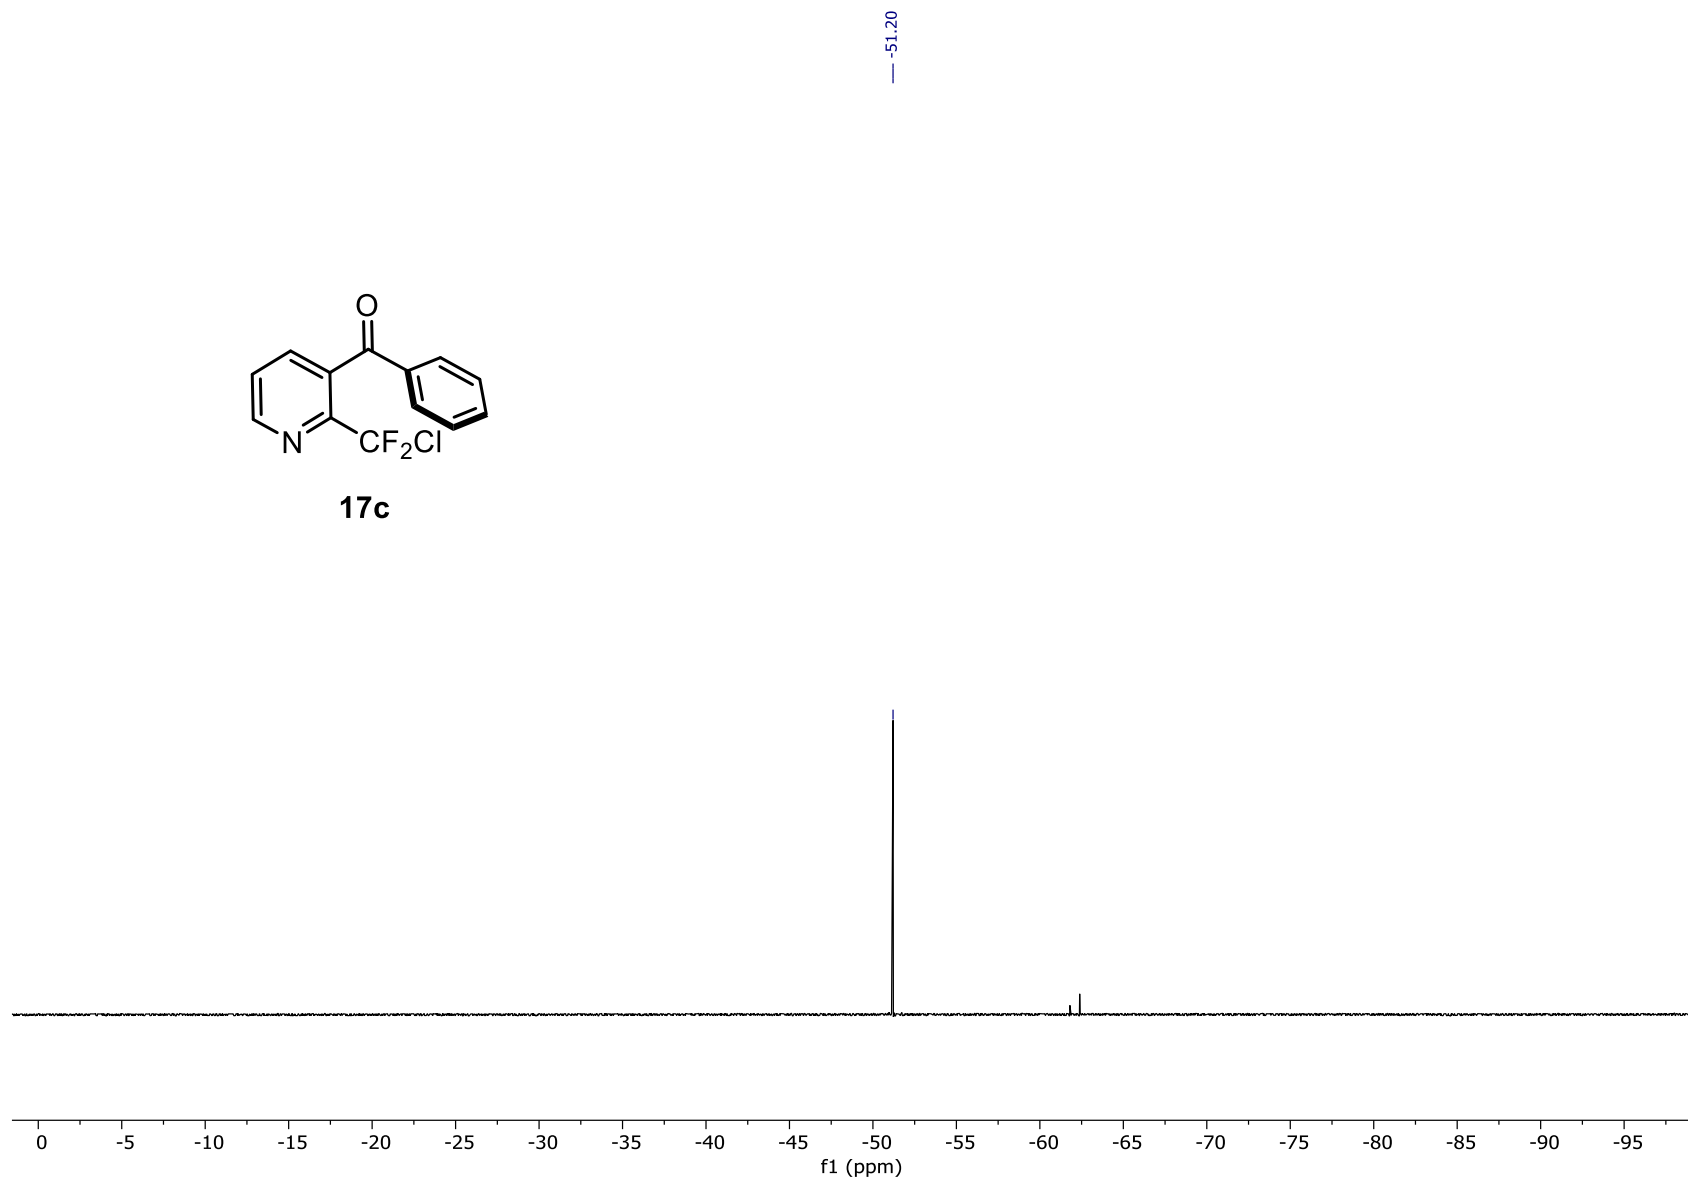

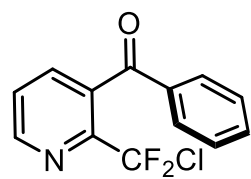

17c

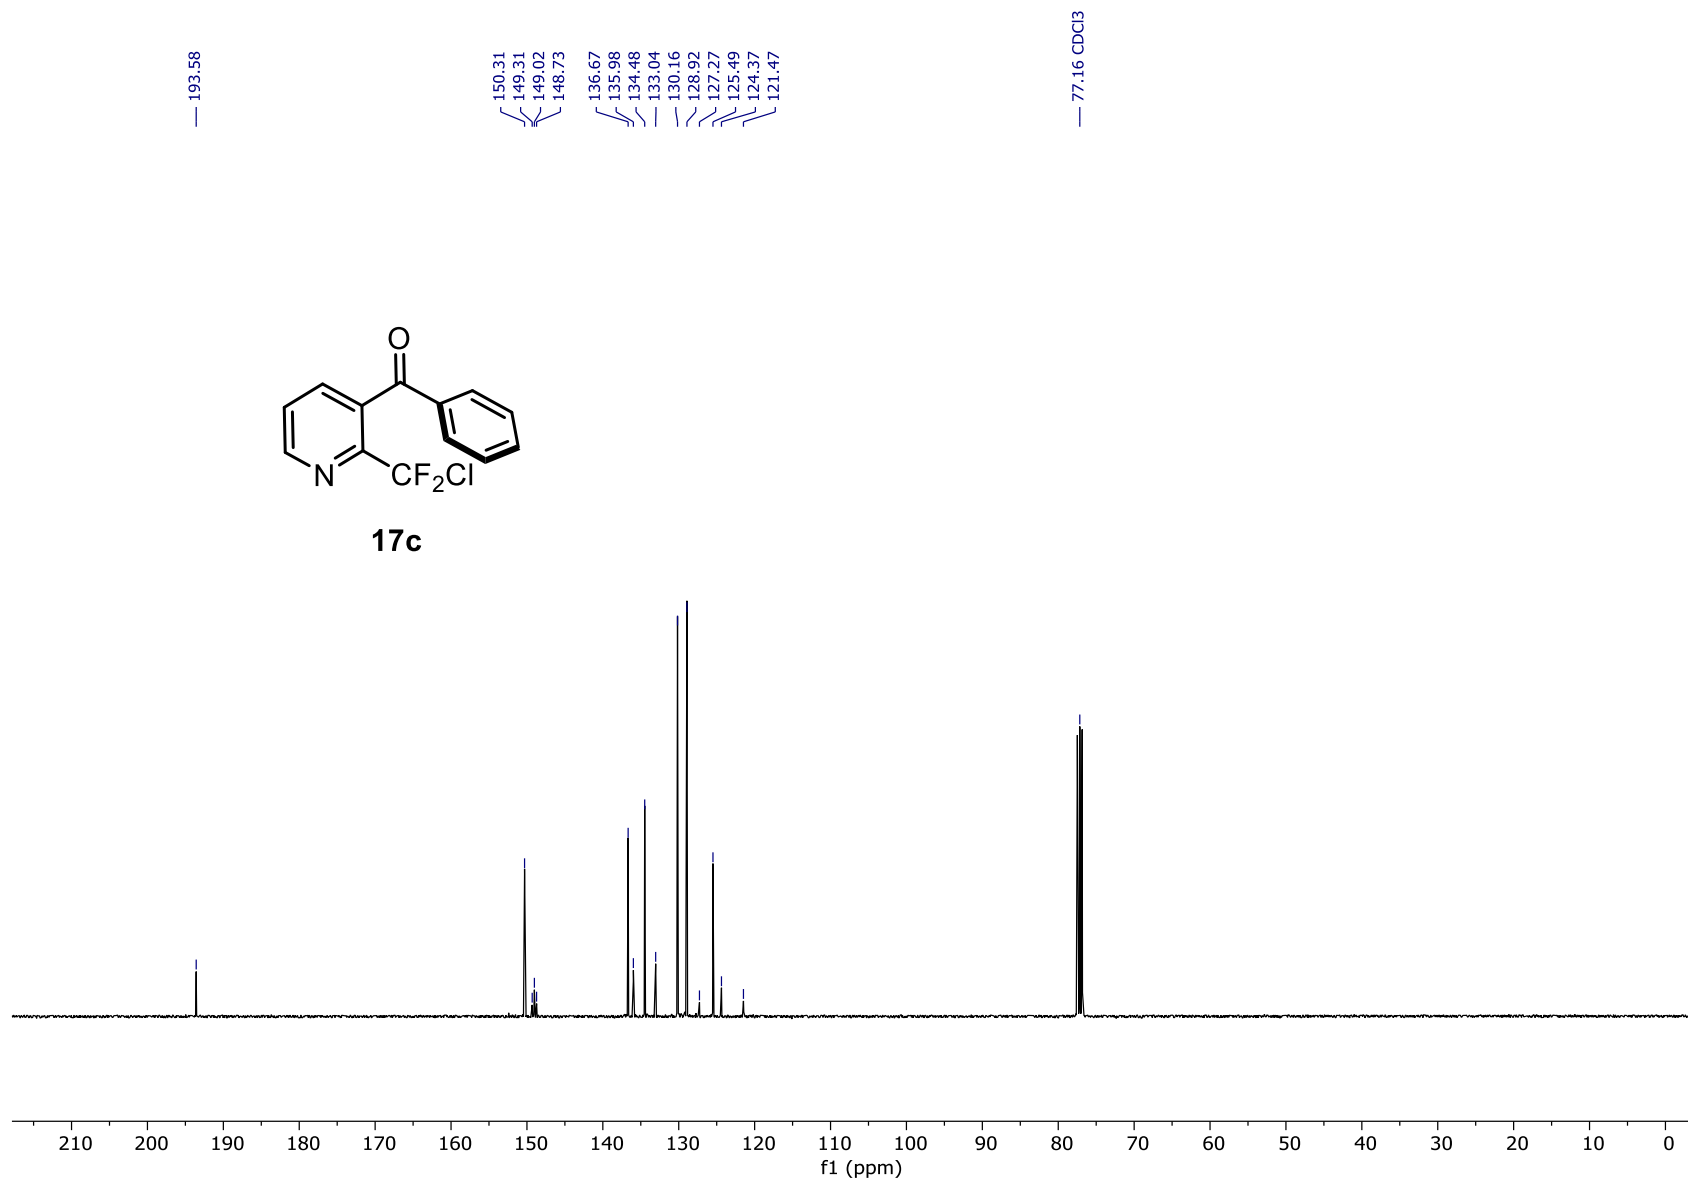

8.87  
8.87  
8.86  
7.76  
7.75  
7.74  
7.74  
7.73  
7.73  
7.65  
7.65  
7.63  
7.62  
7.61  
7.61  
7.60  
7.59  
7.50  
7.48  
7.46  
7.26 CDCl<sub>3</sub>

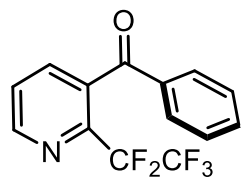

17d

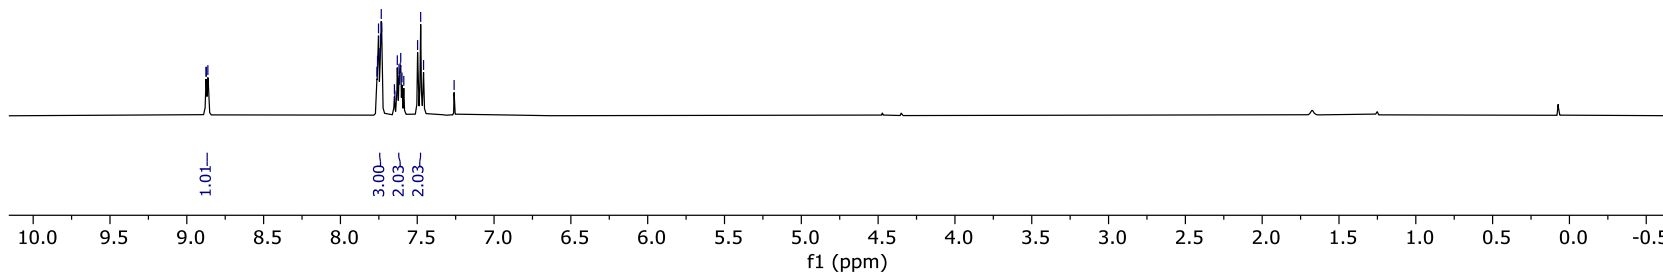

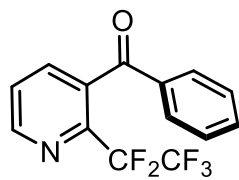

17d

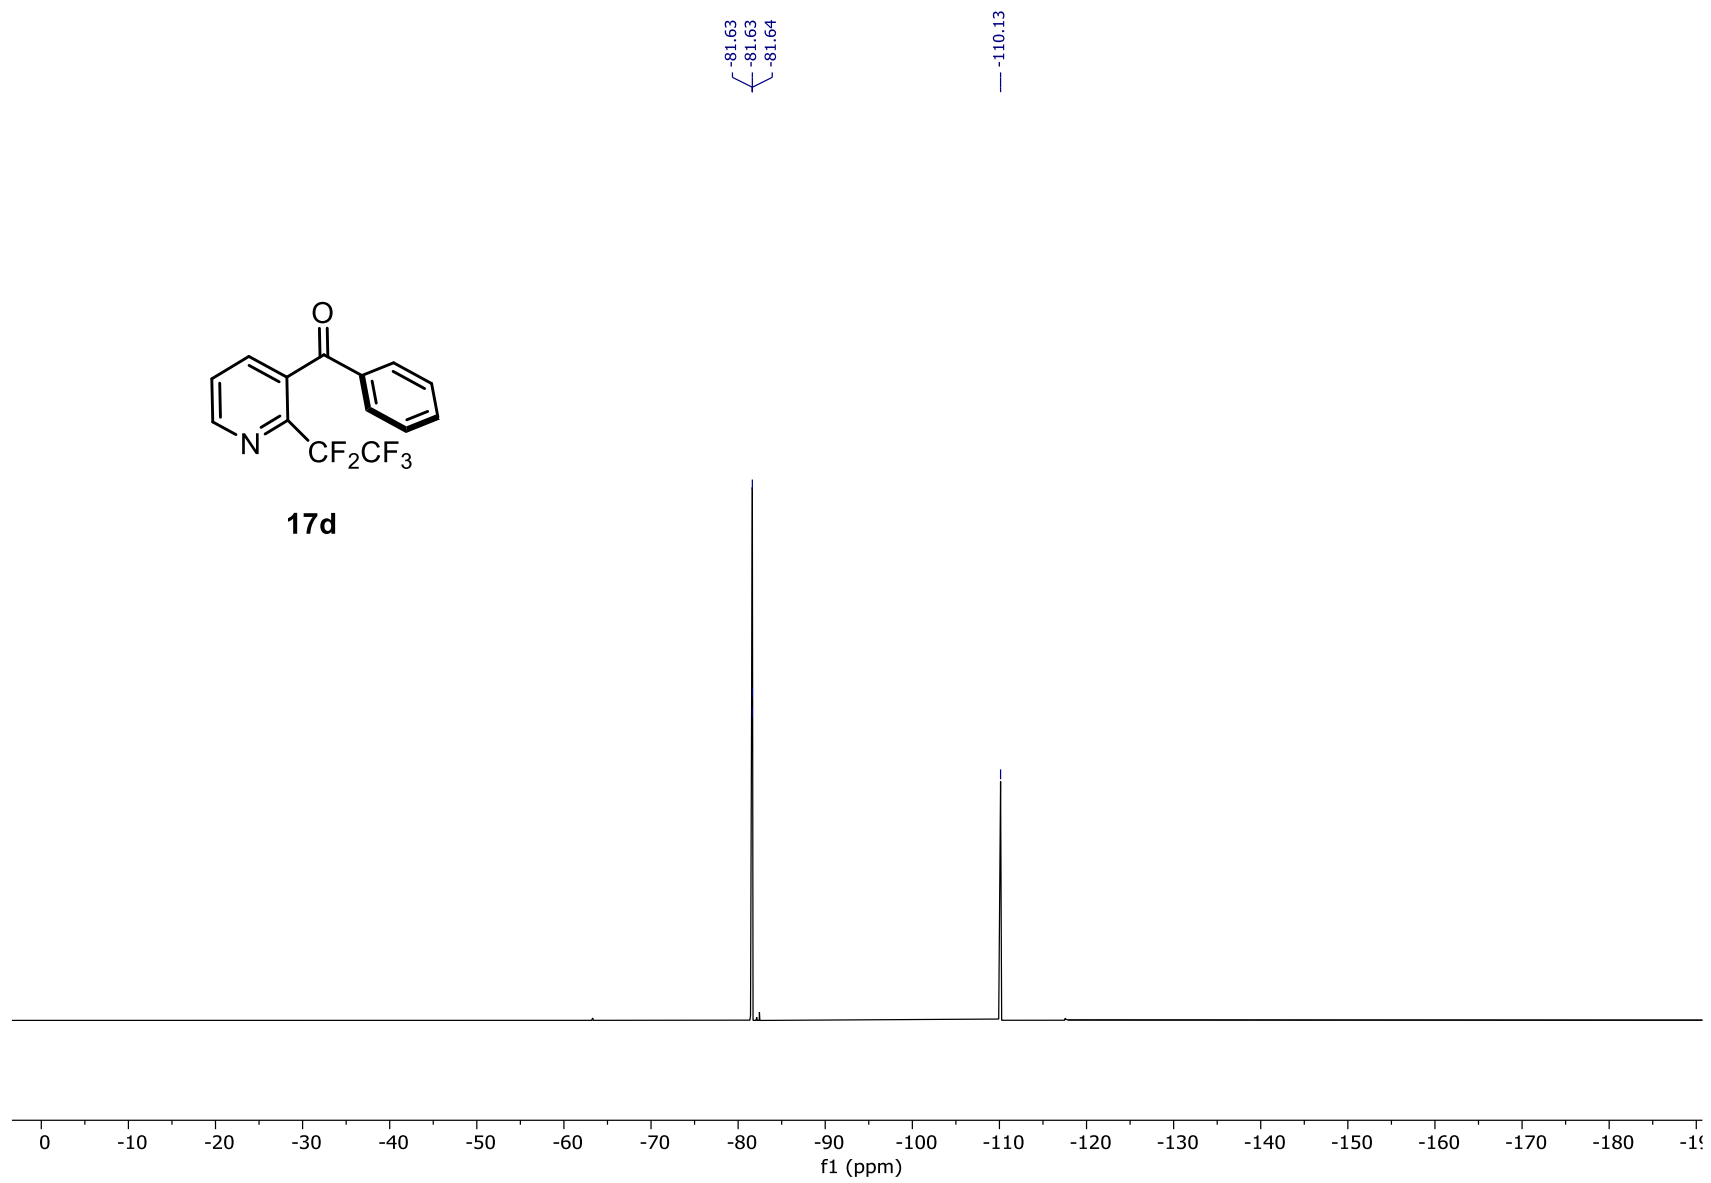

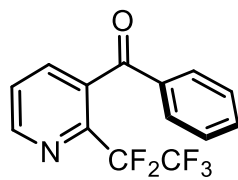

17d

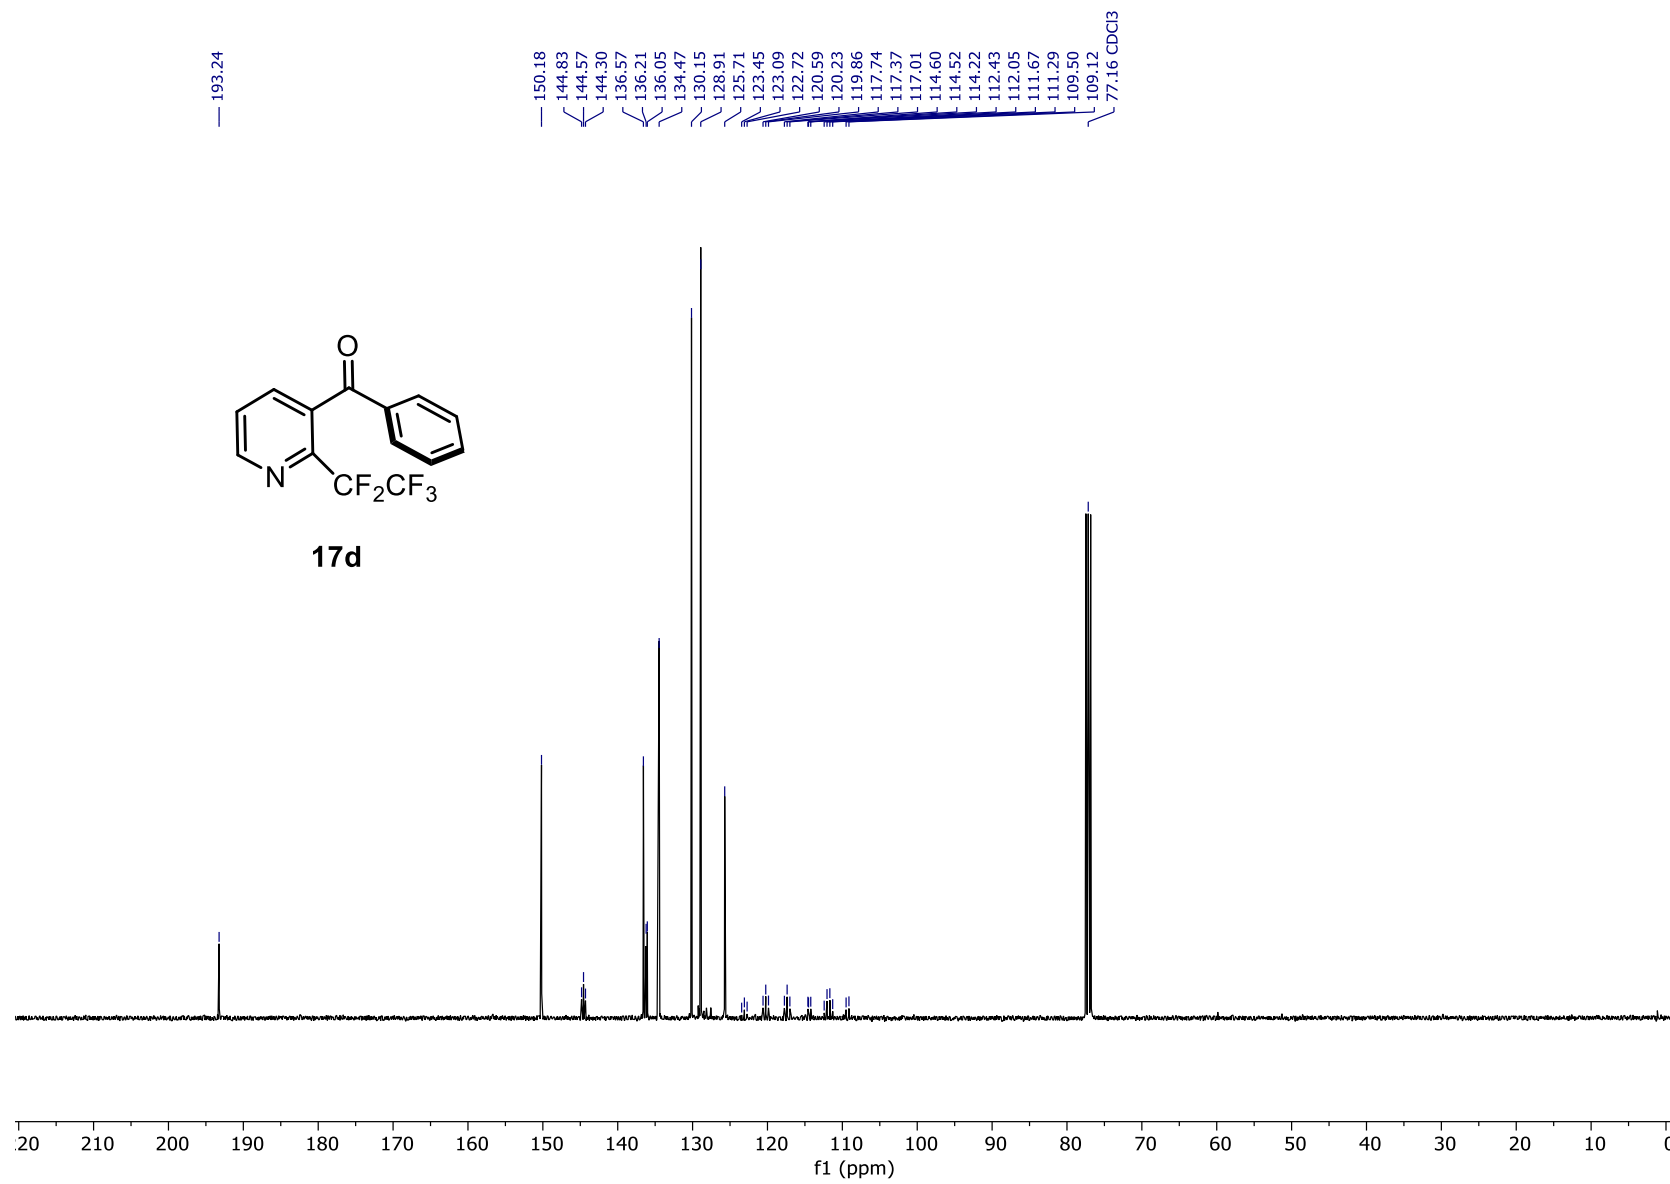

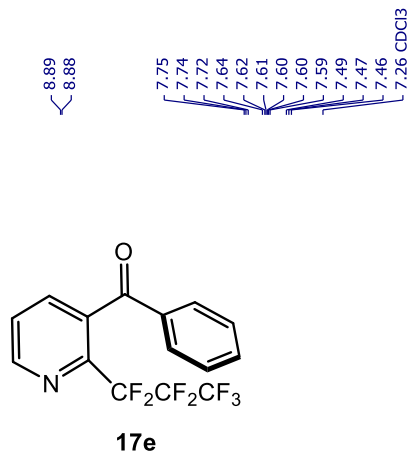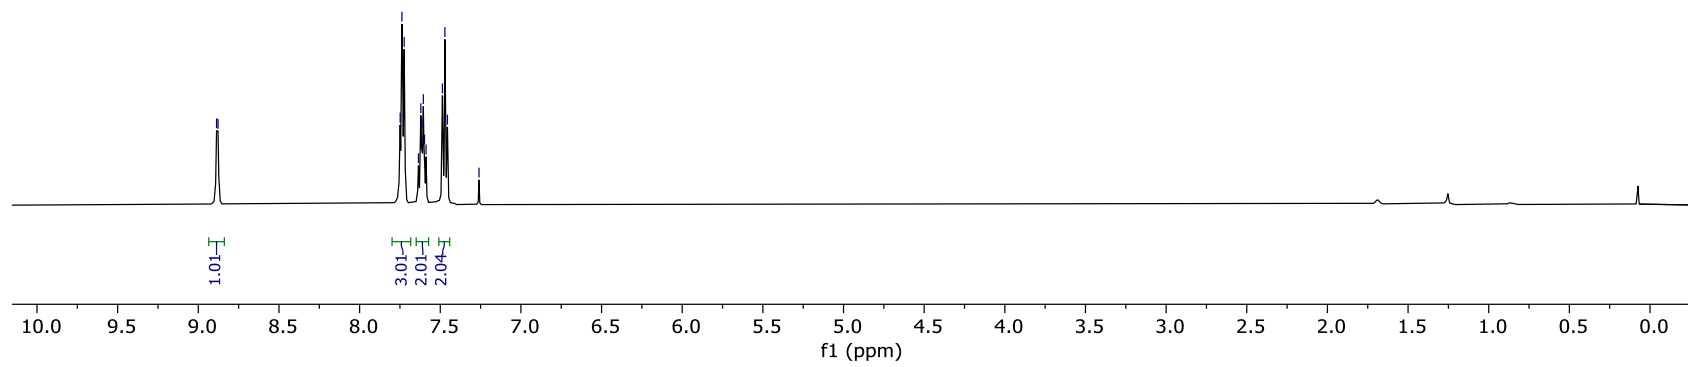

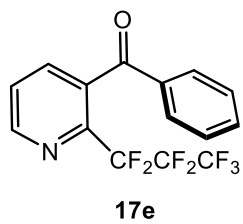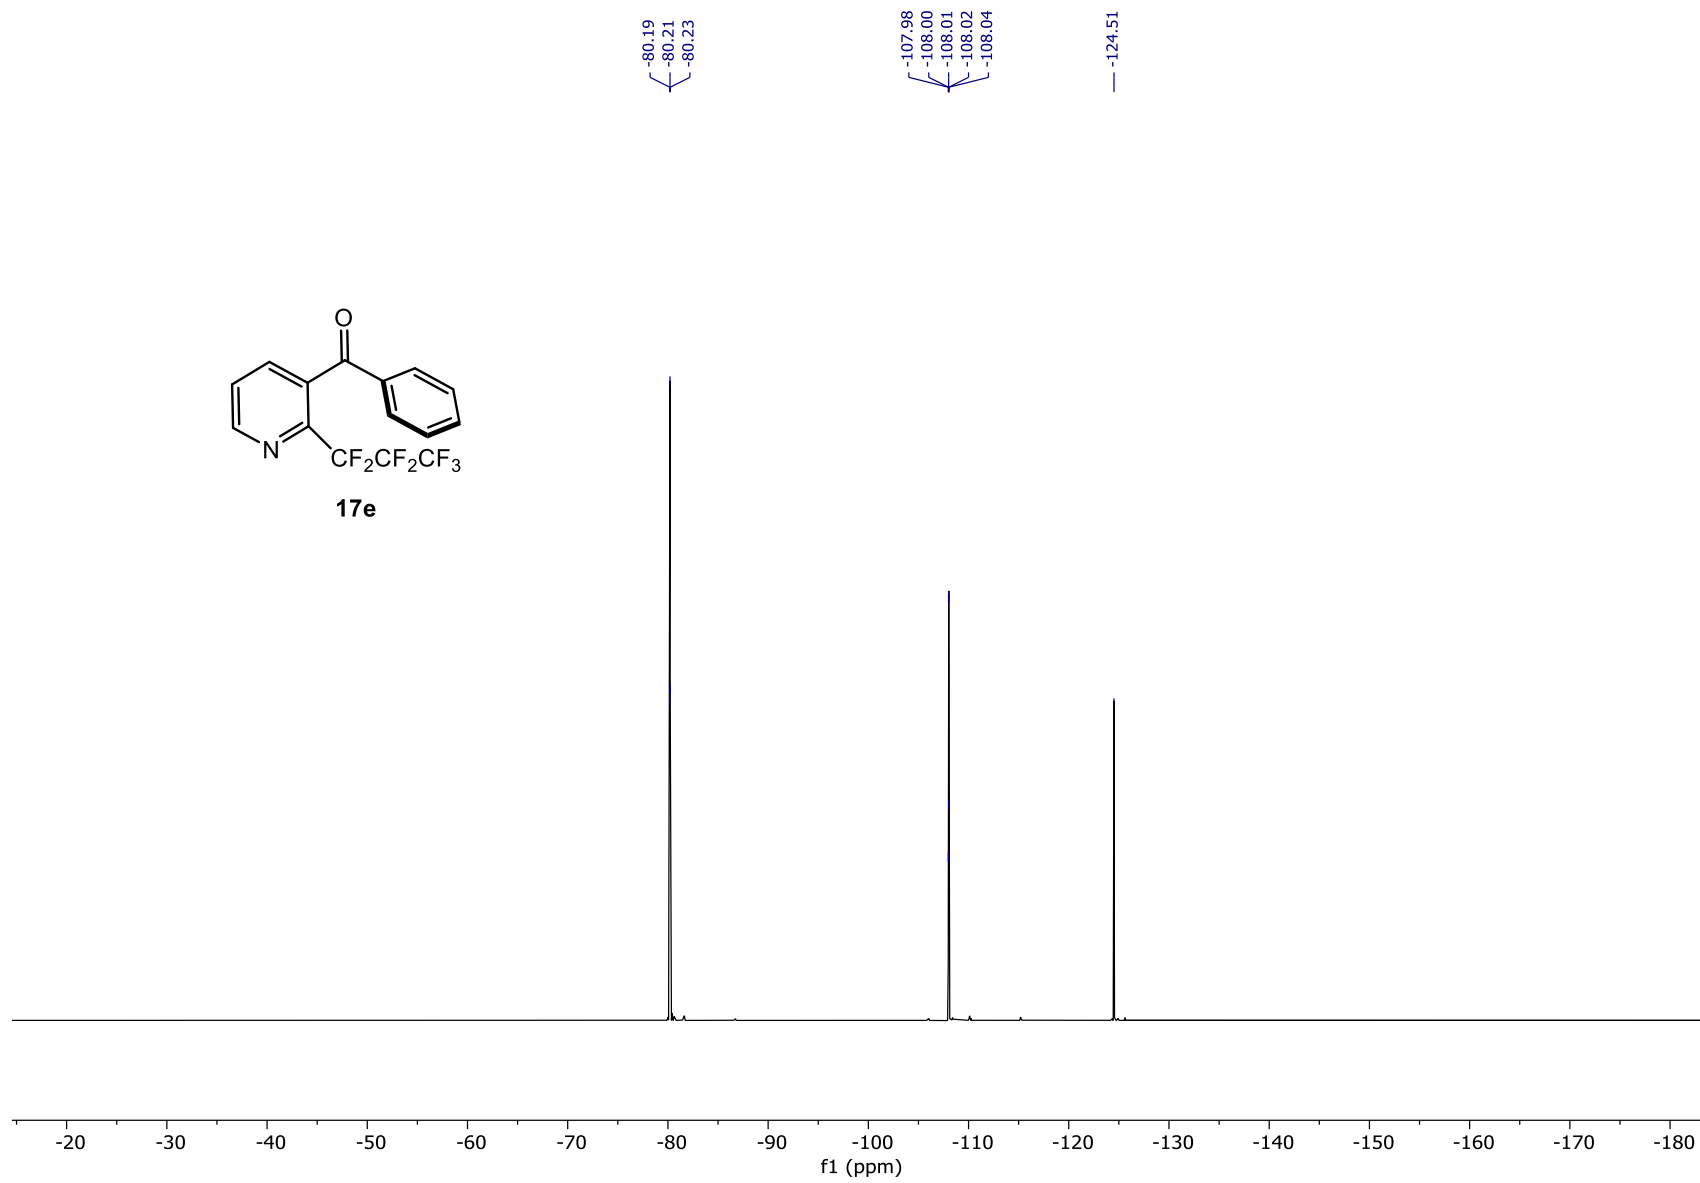

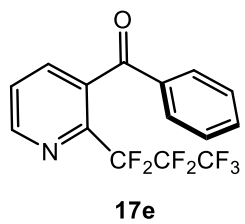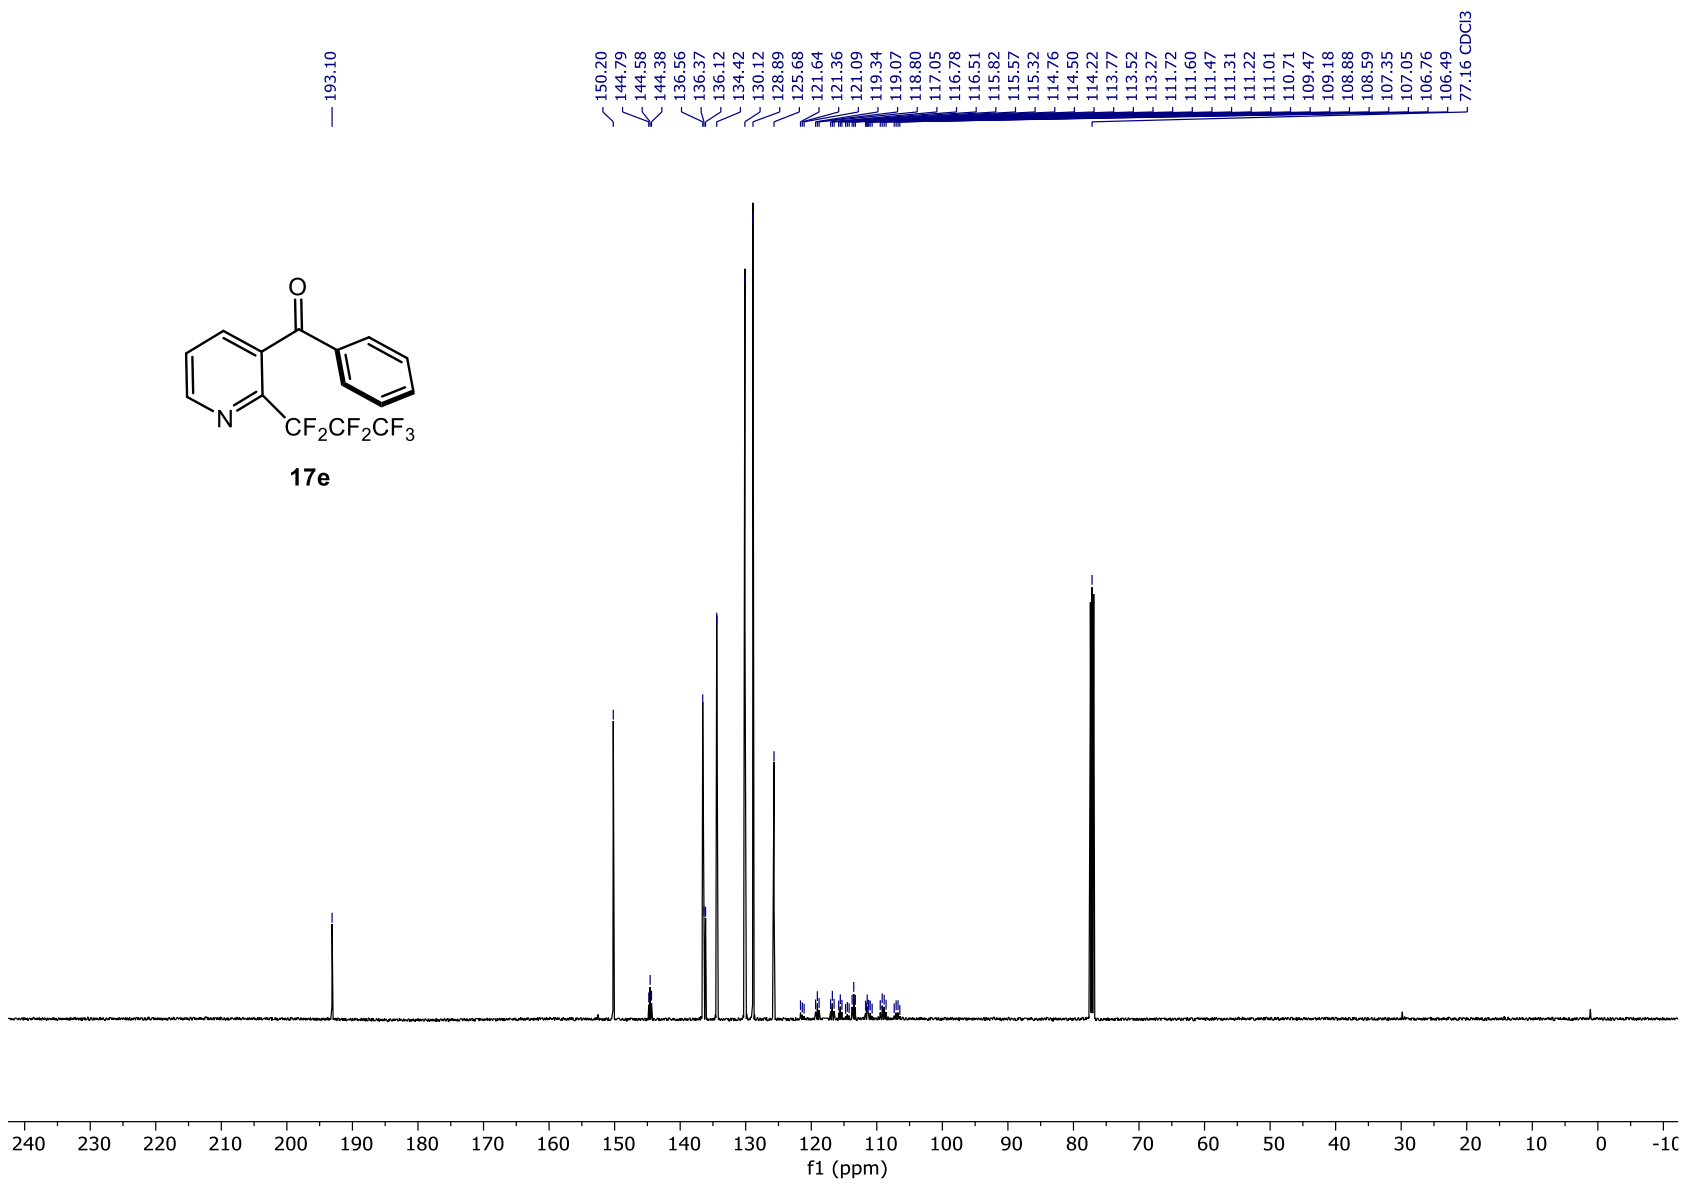

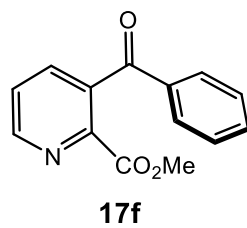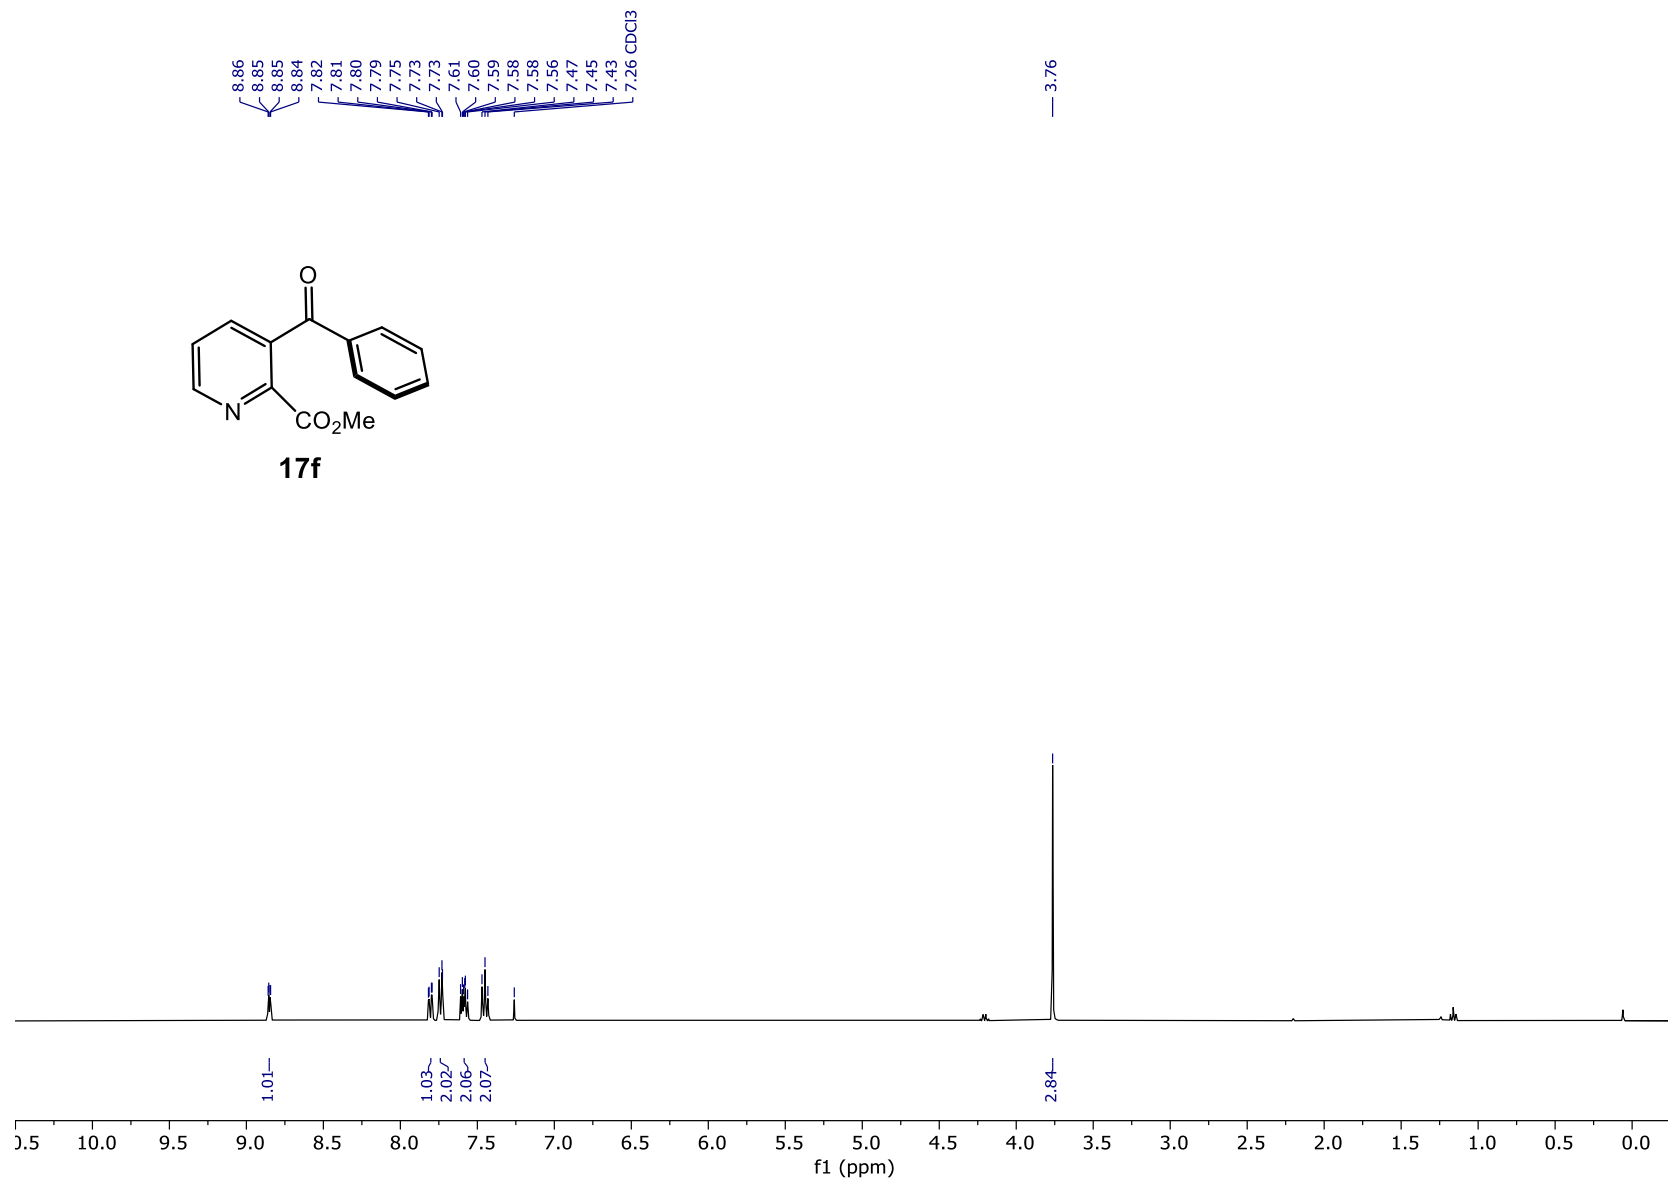

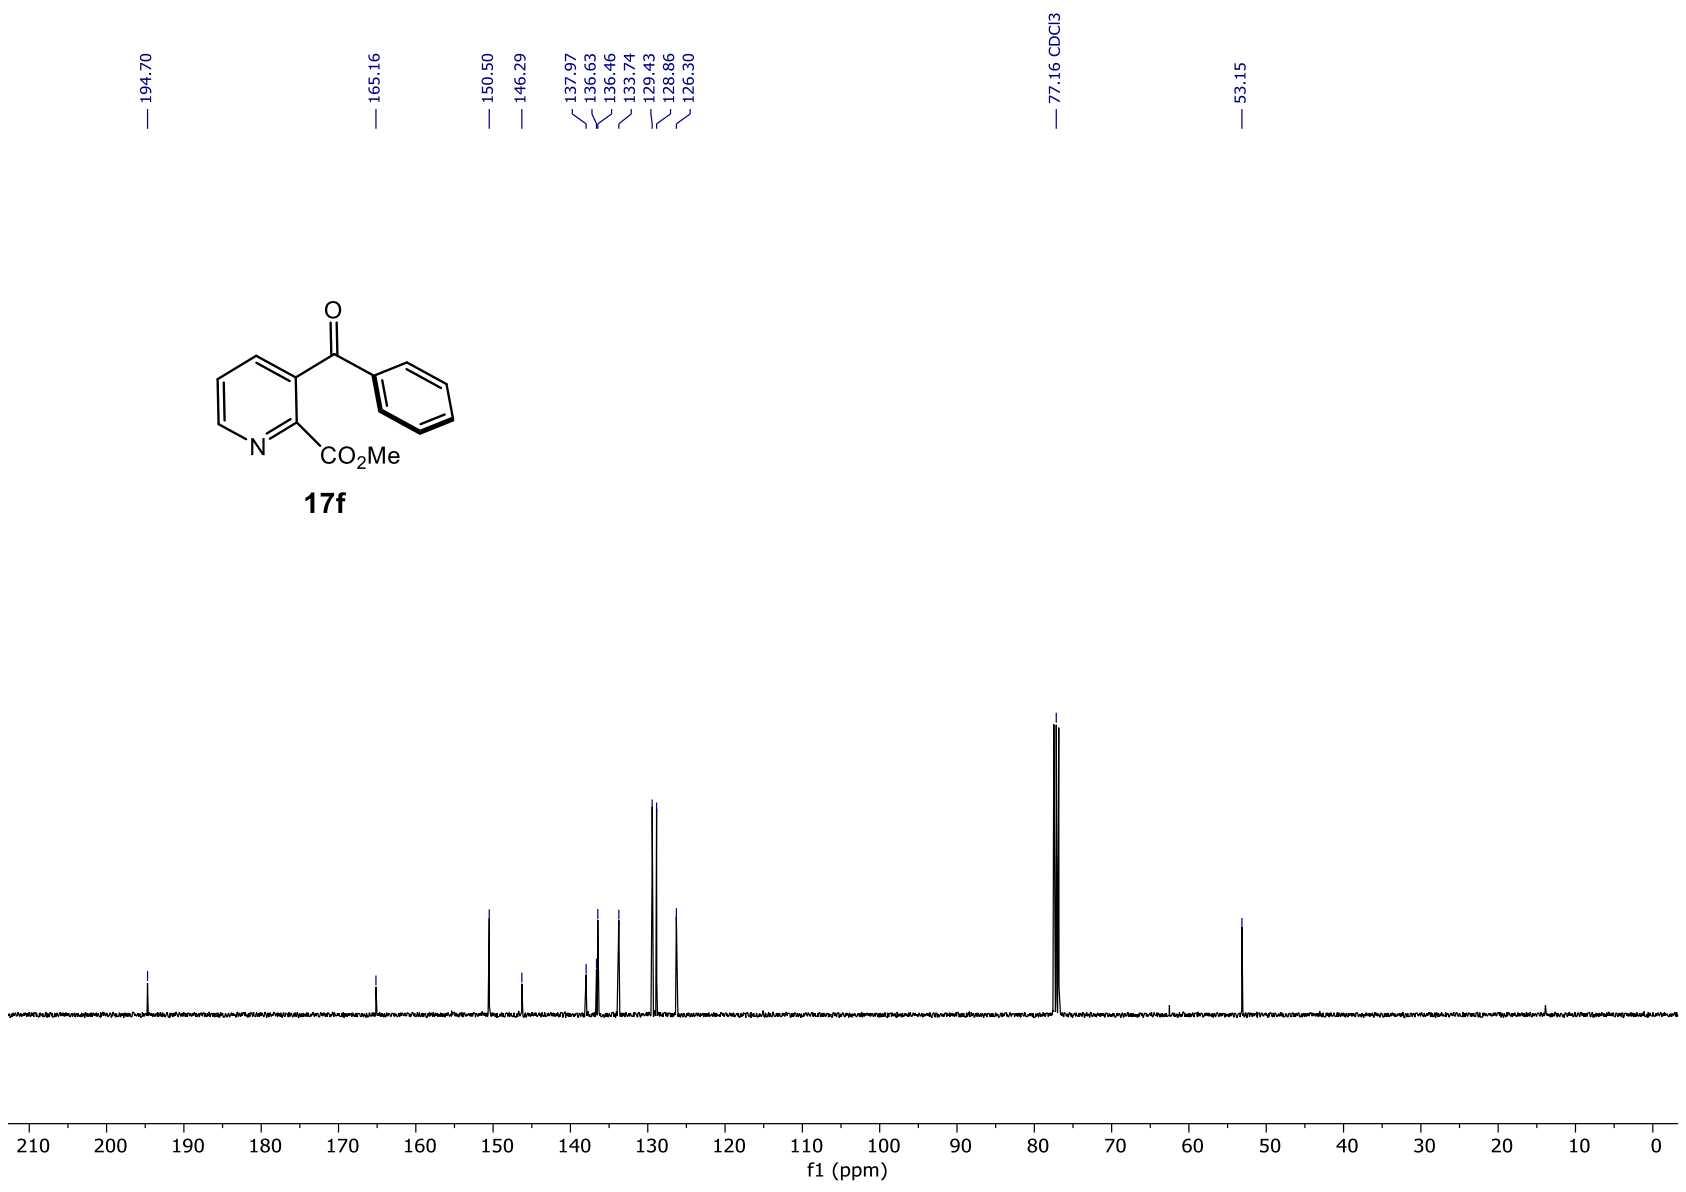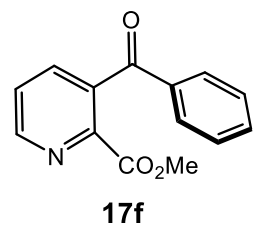

8.88  
8.87  
8.86  
8.86  
7.82  
7.81  
7.80  
7.79  
7.76  
7.74  
7.74  
7.60  
7.59  
7.59  
7.58  
7.57  
7.57  
7.47  
7.45  
7.44  
7.26 CDCl3

4.24  
4.23  
4.21  
4.19

1.19  
1.17  
1.15

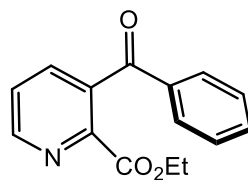

**17g**

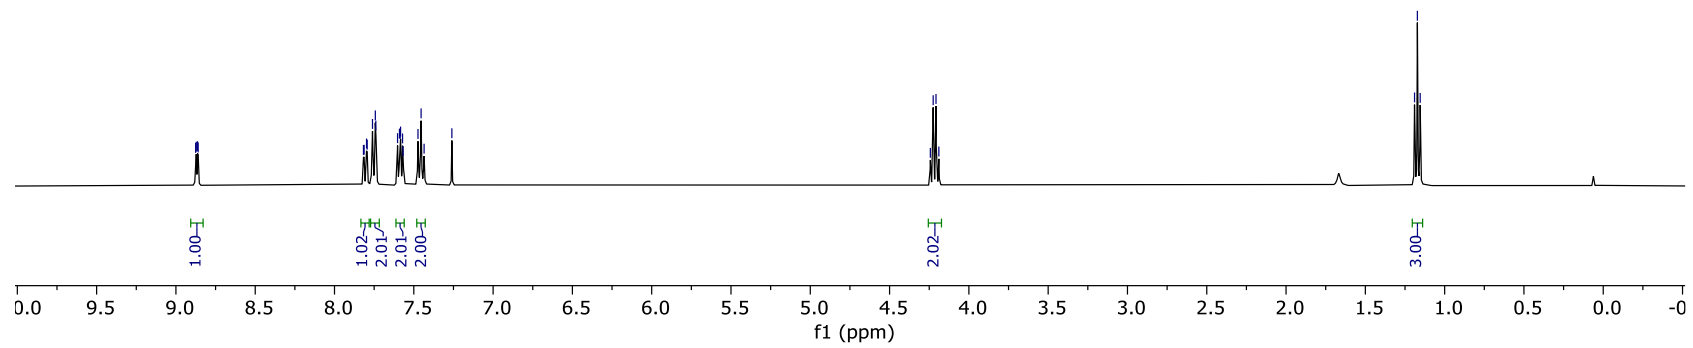

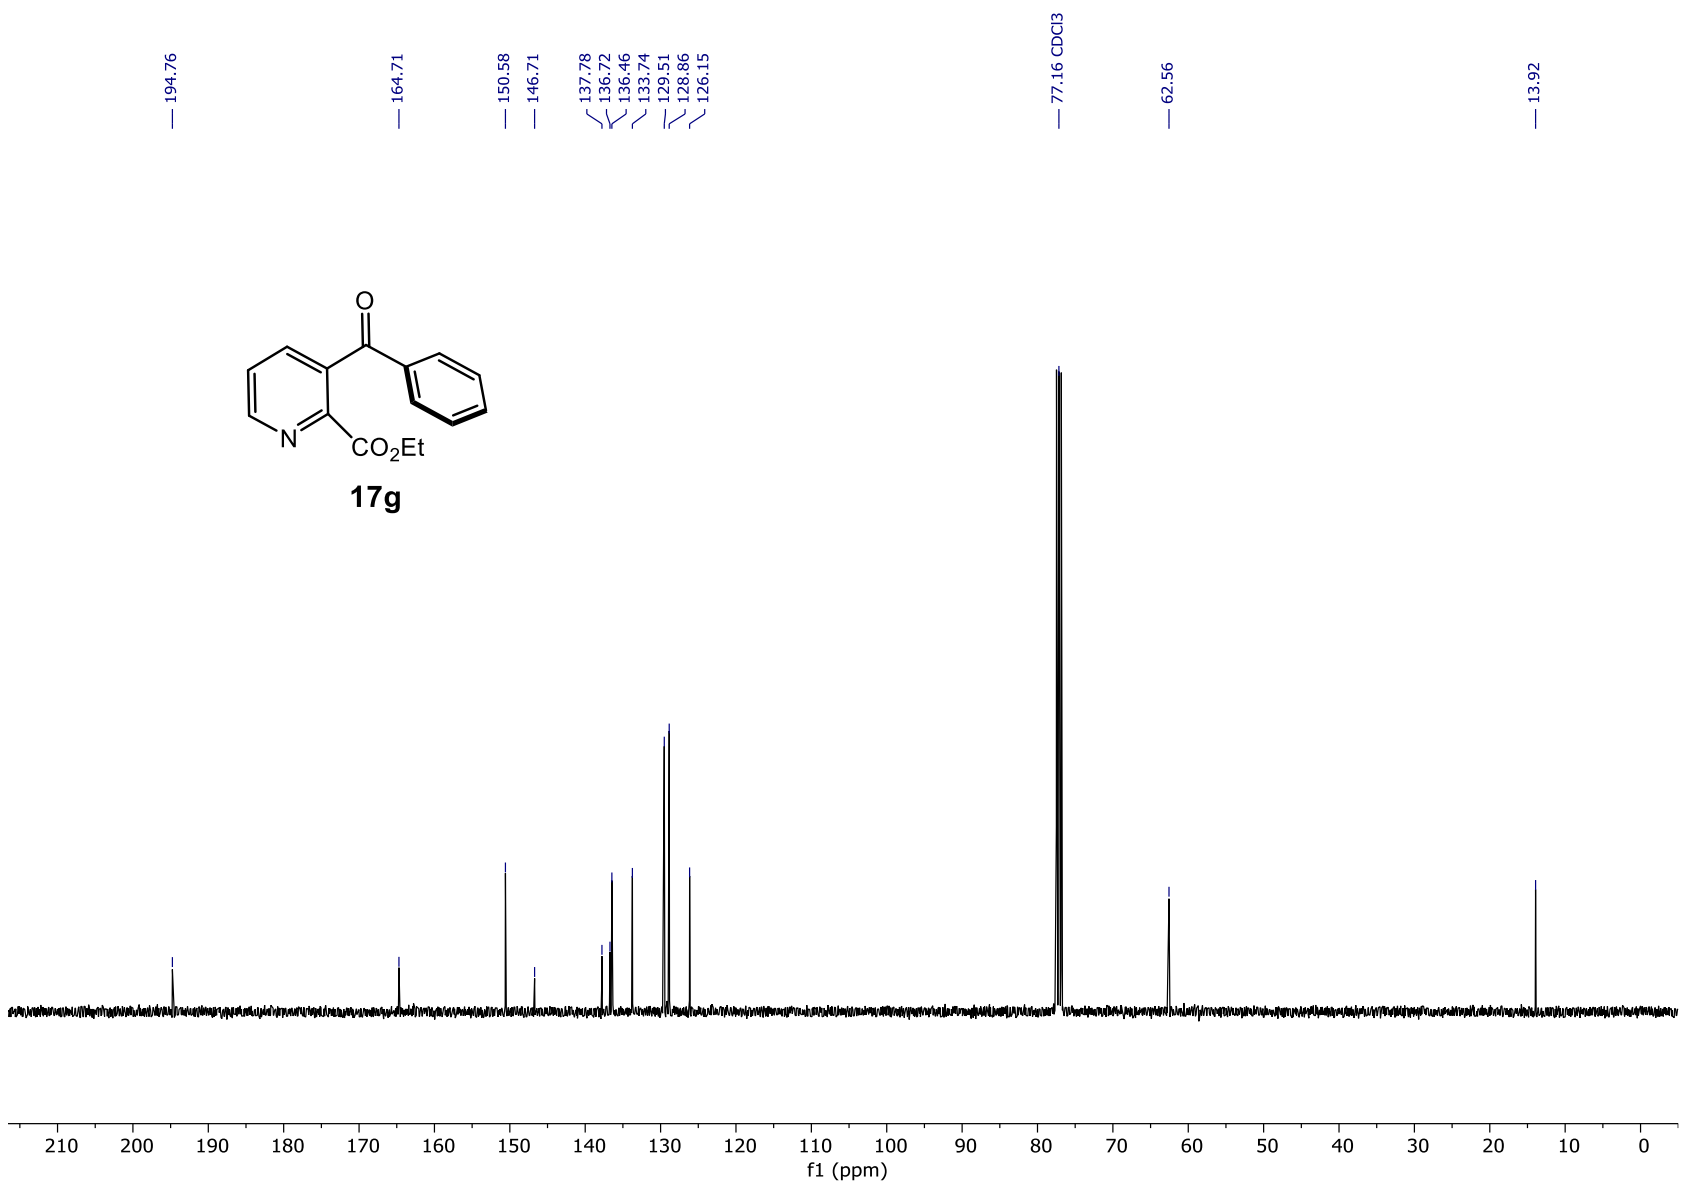

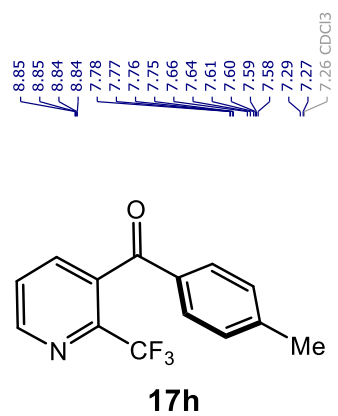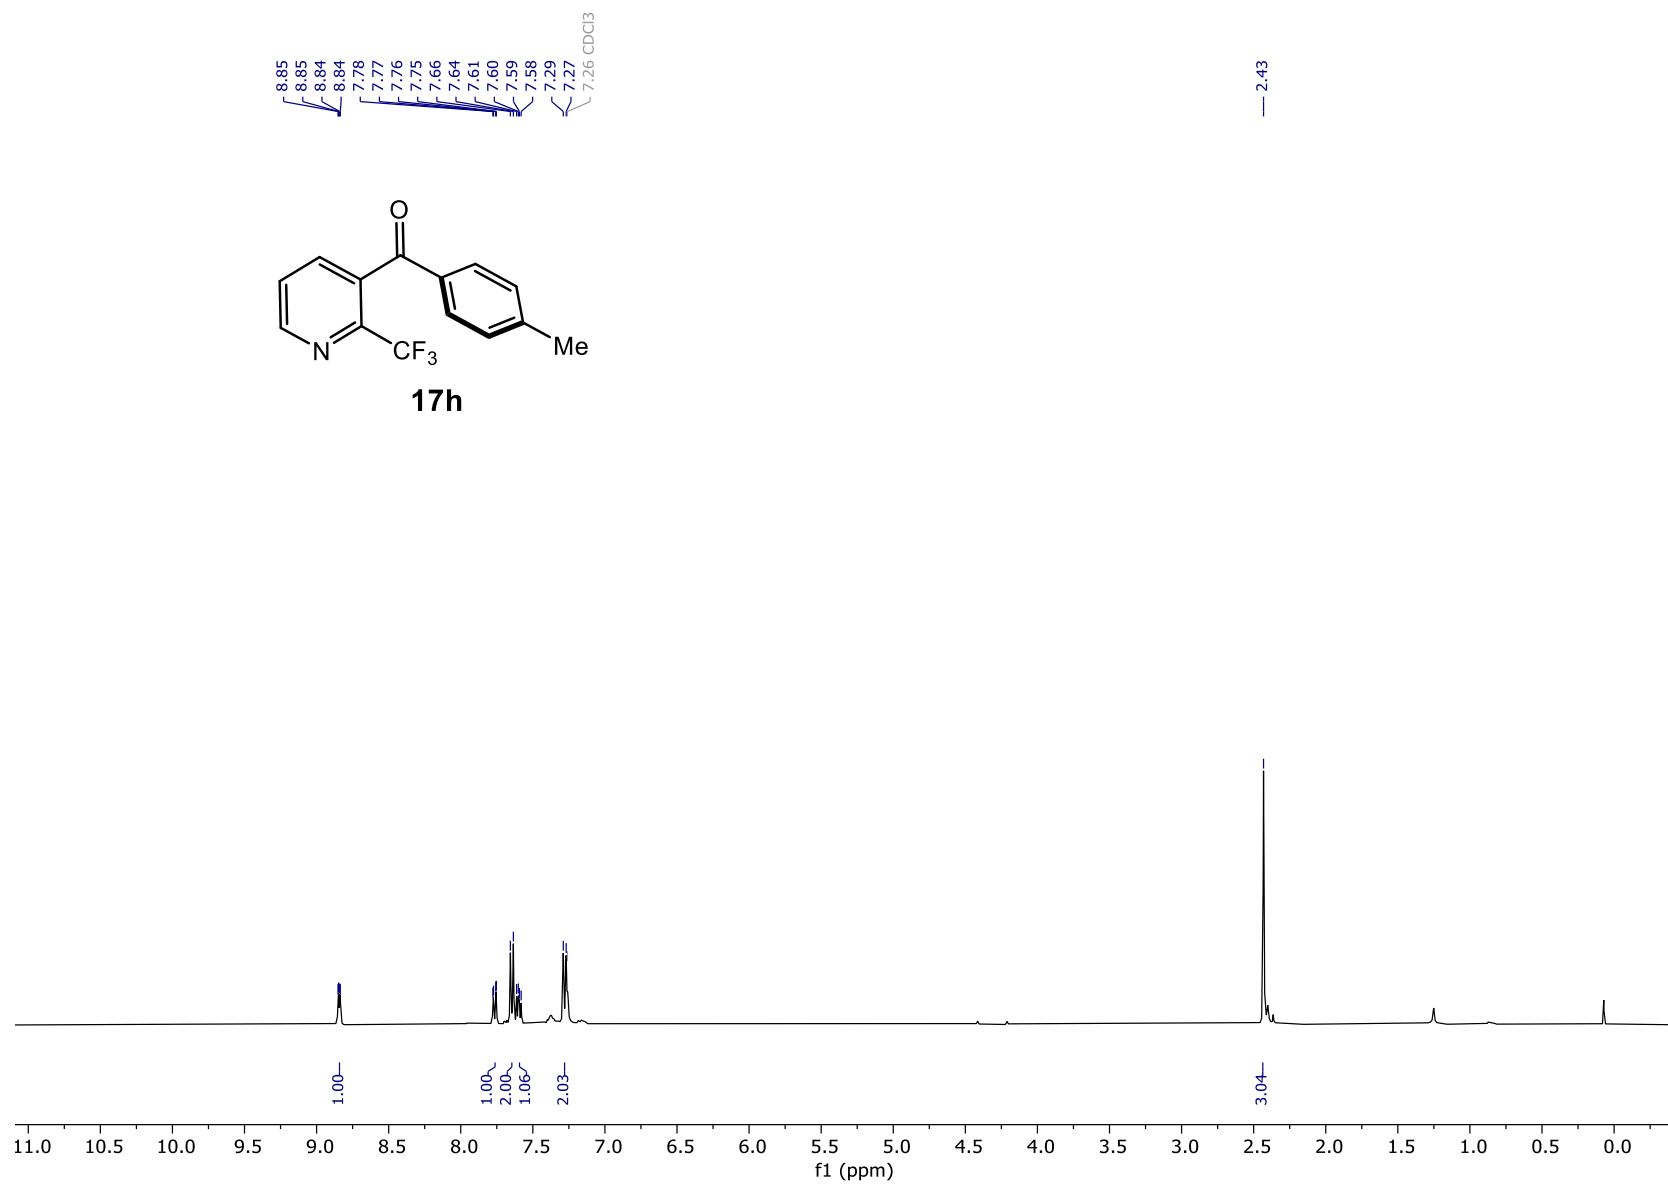

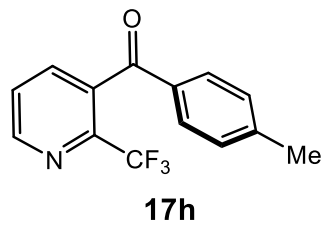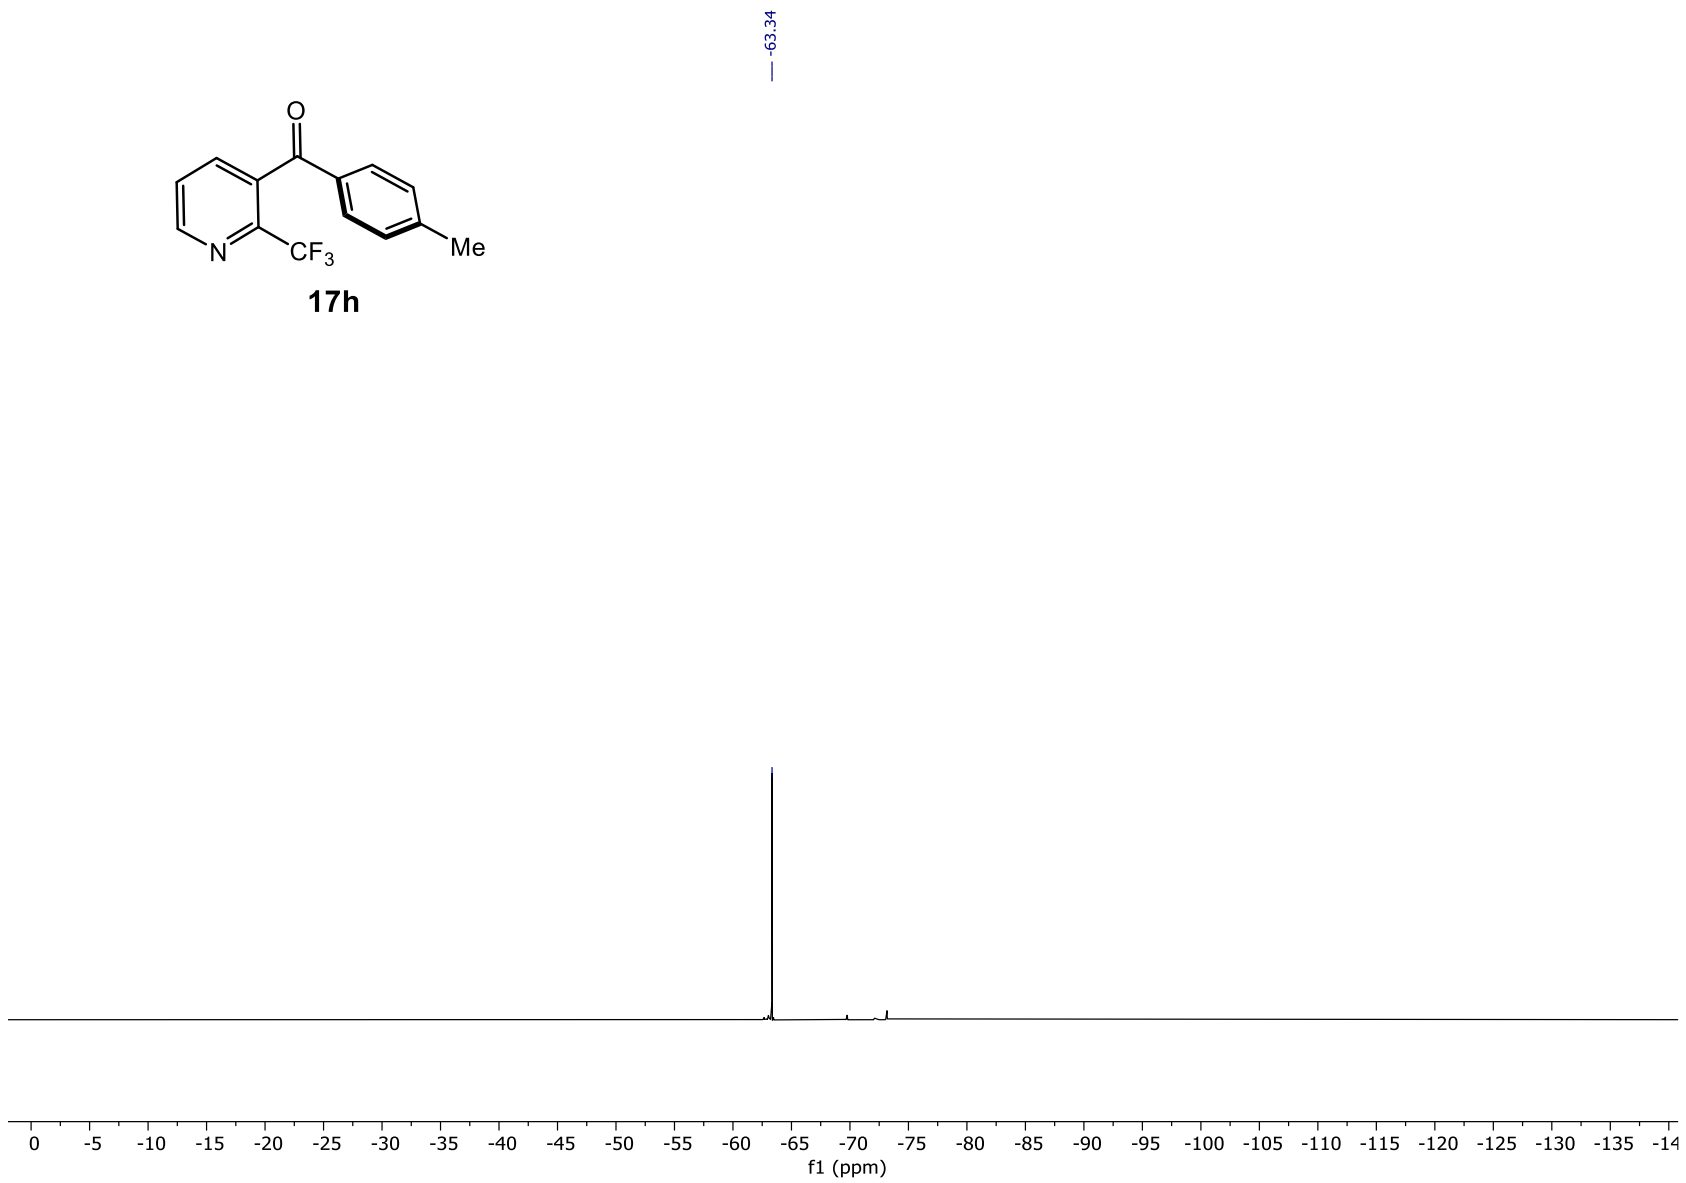

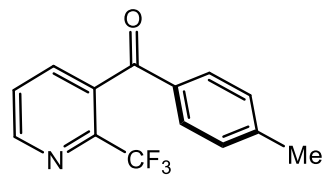

**17h**

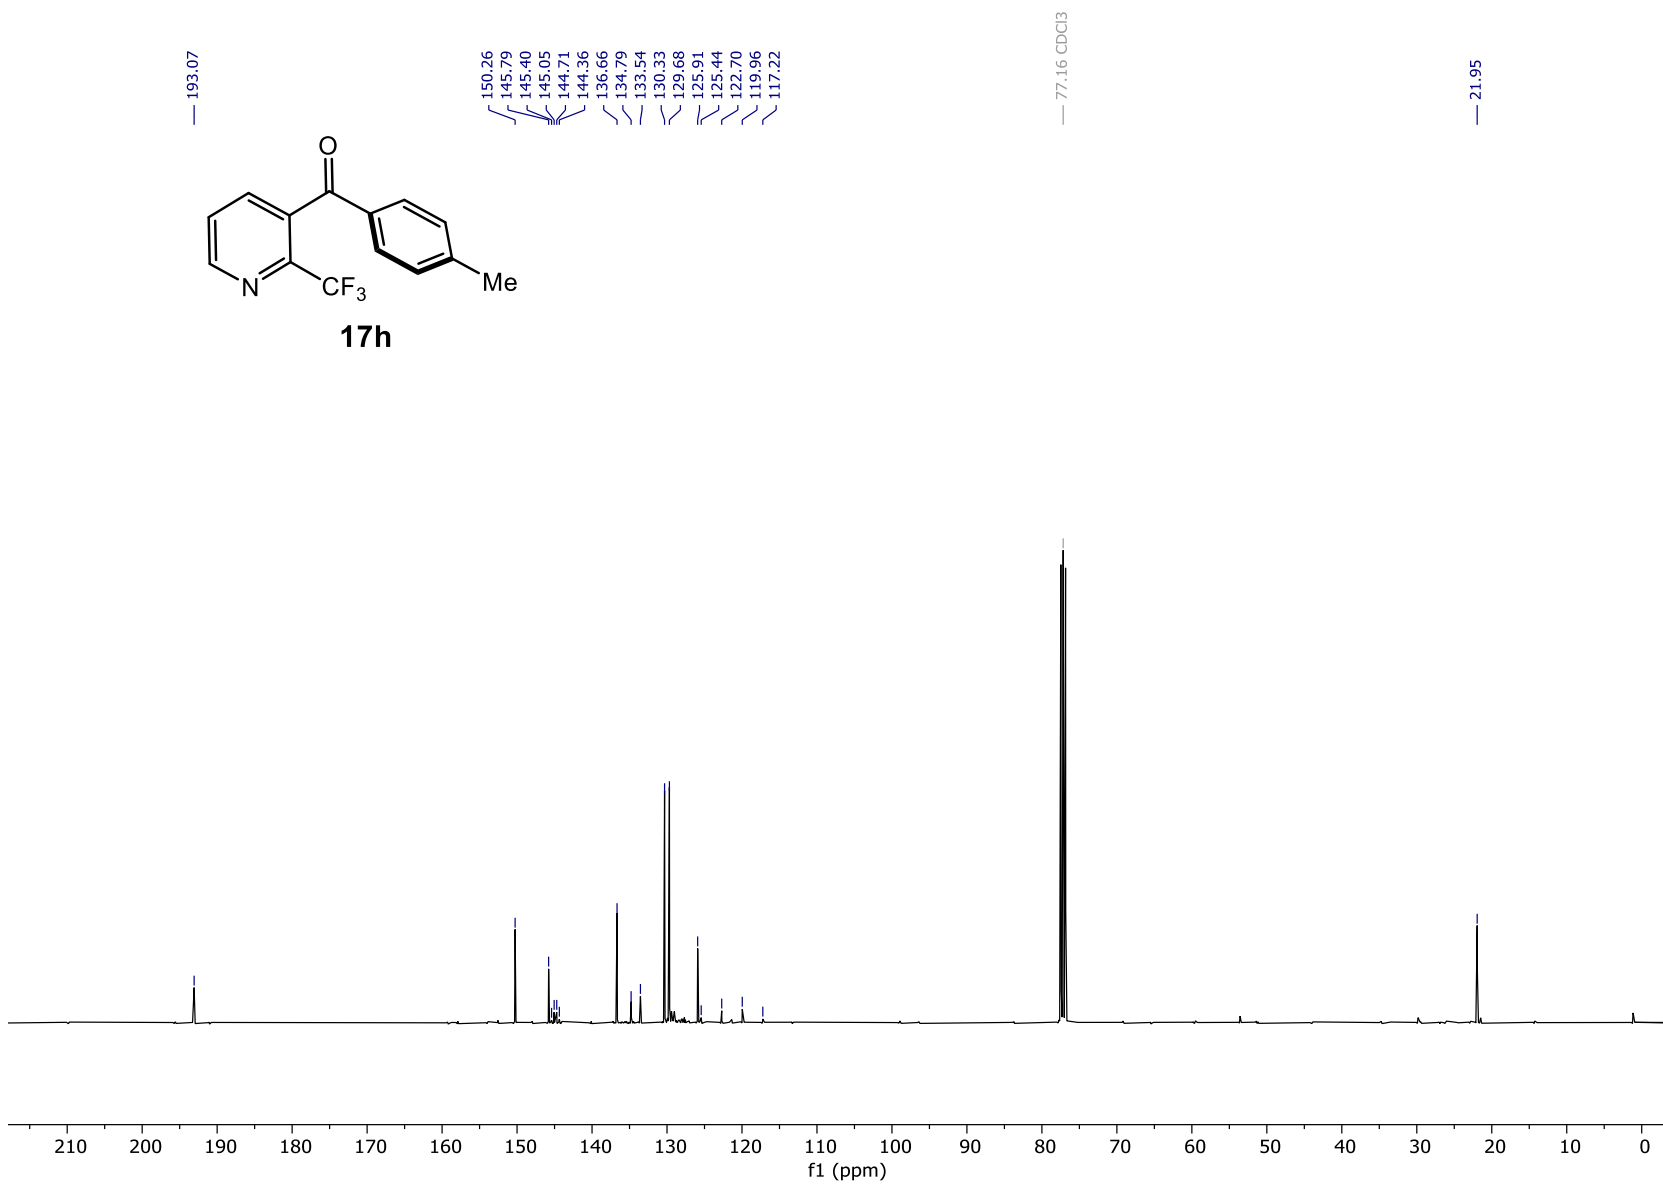

8.82  
8.82  
8.81  
8.81  
7.78  
7.76  
7.68  
7.66  
7.51  
7.50  
7.49  
7.29  
7.27  
7.26 CDCl3  
6.92  
6.81  
6.70  
2.43

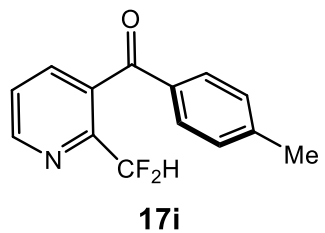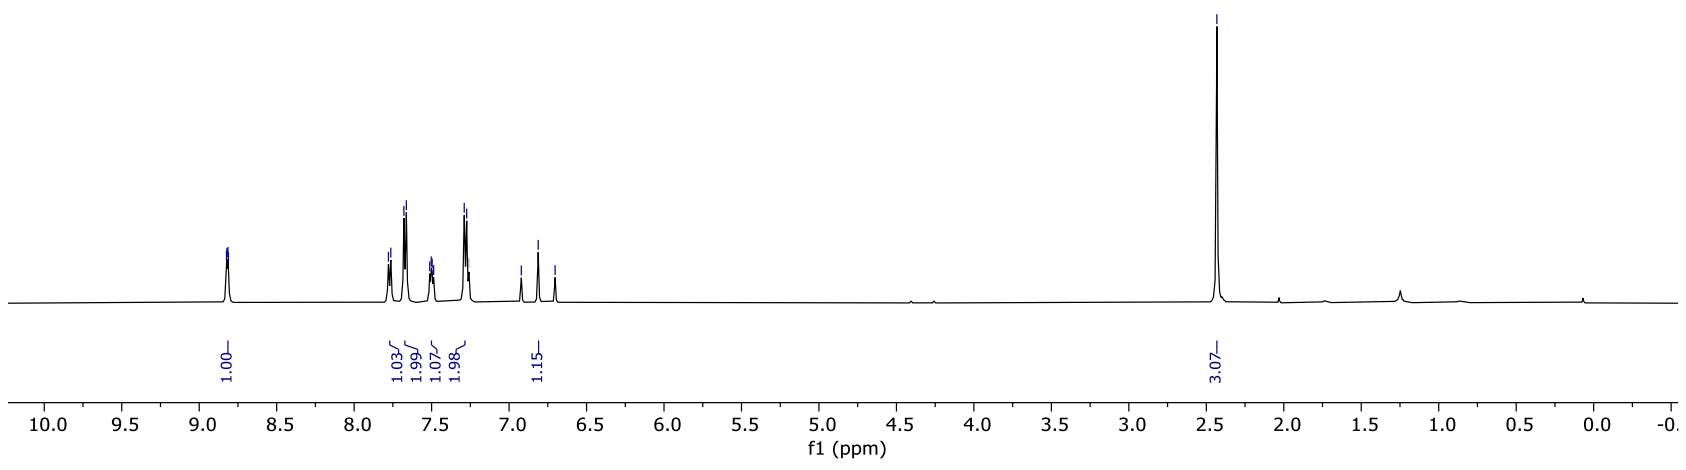

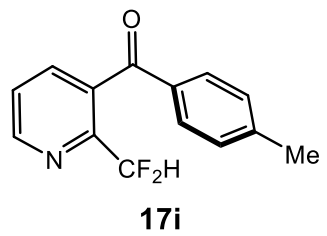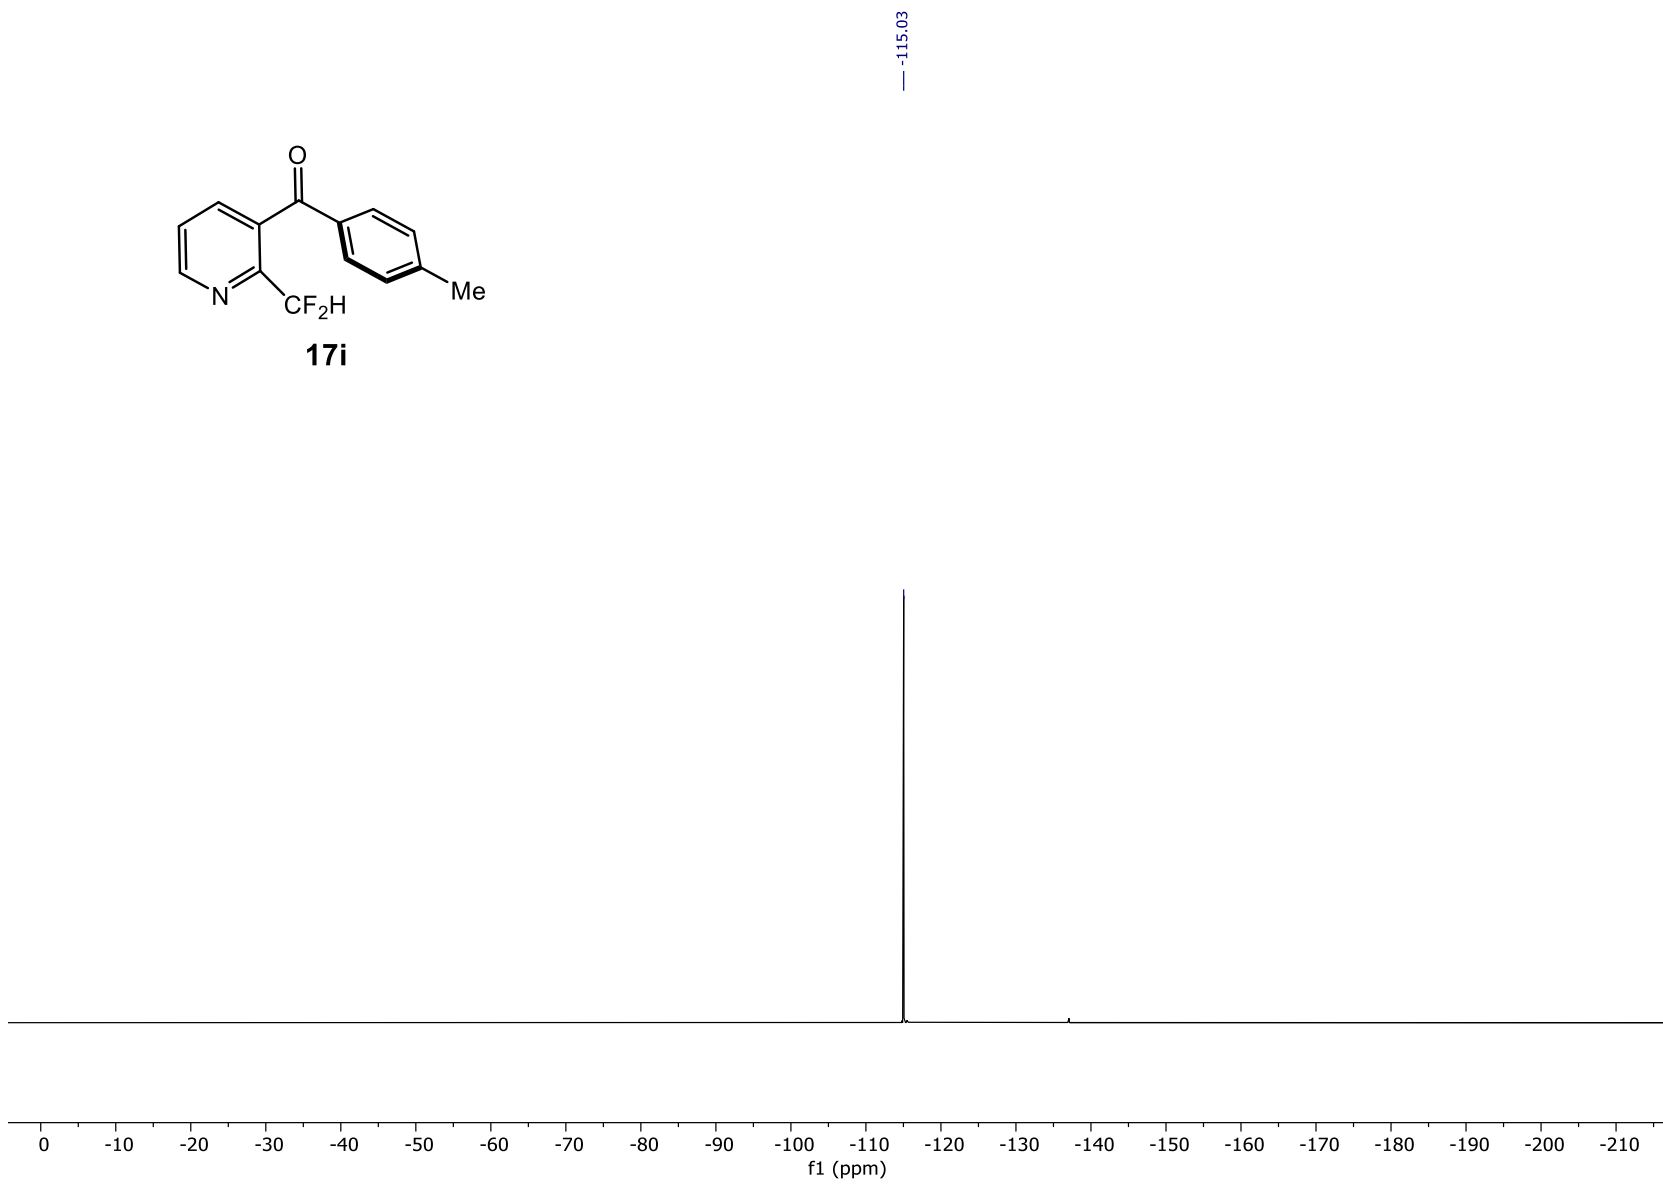

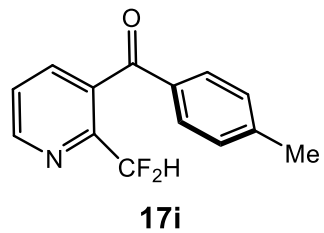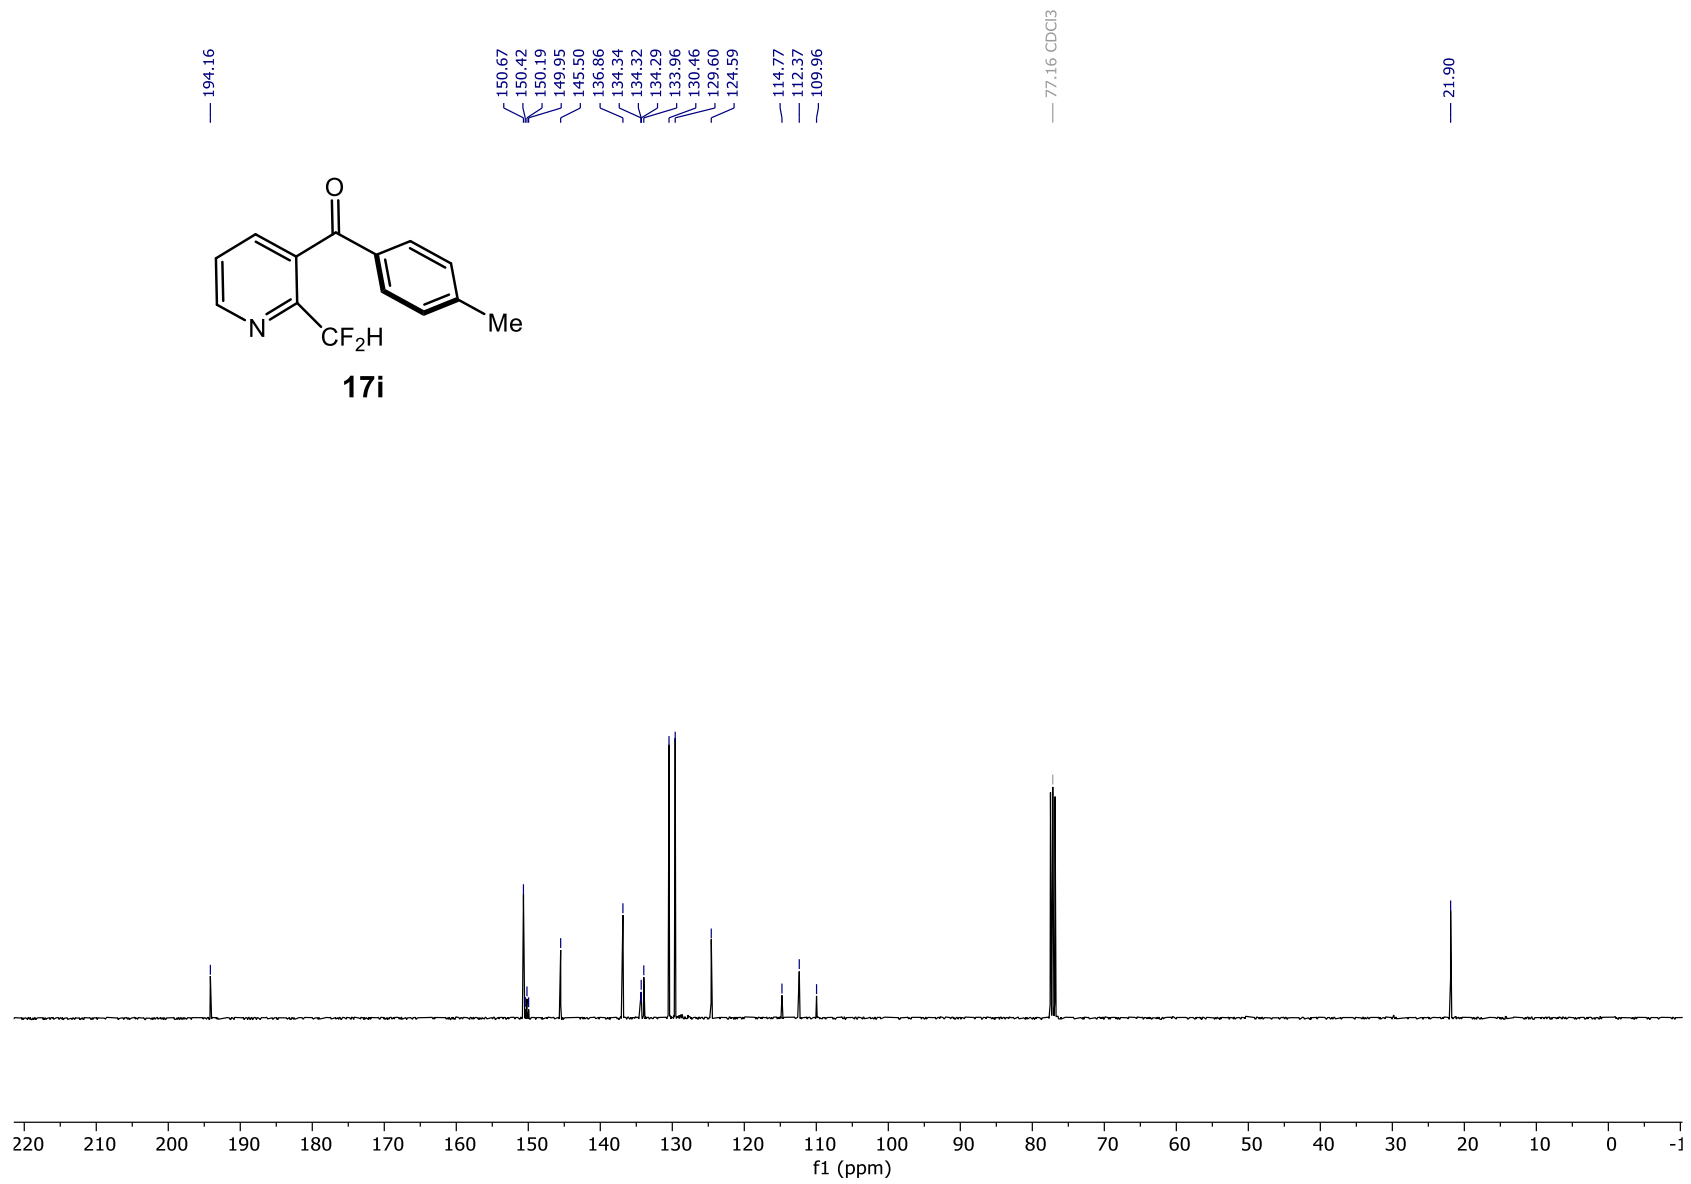

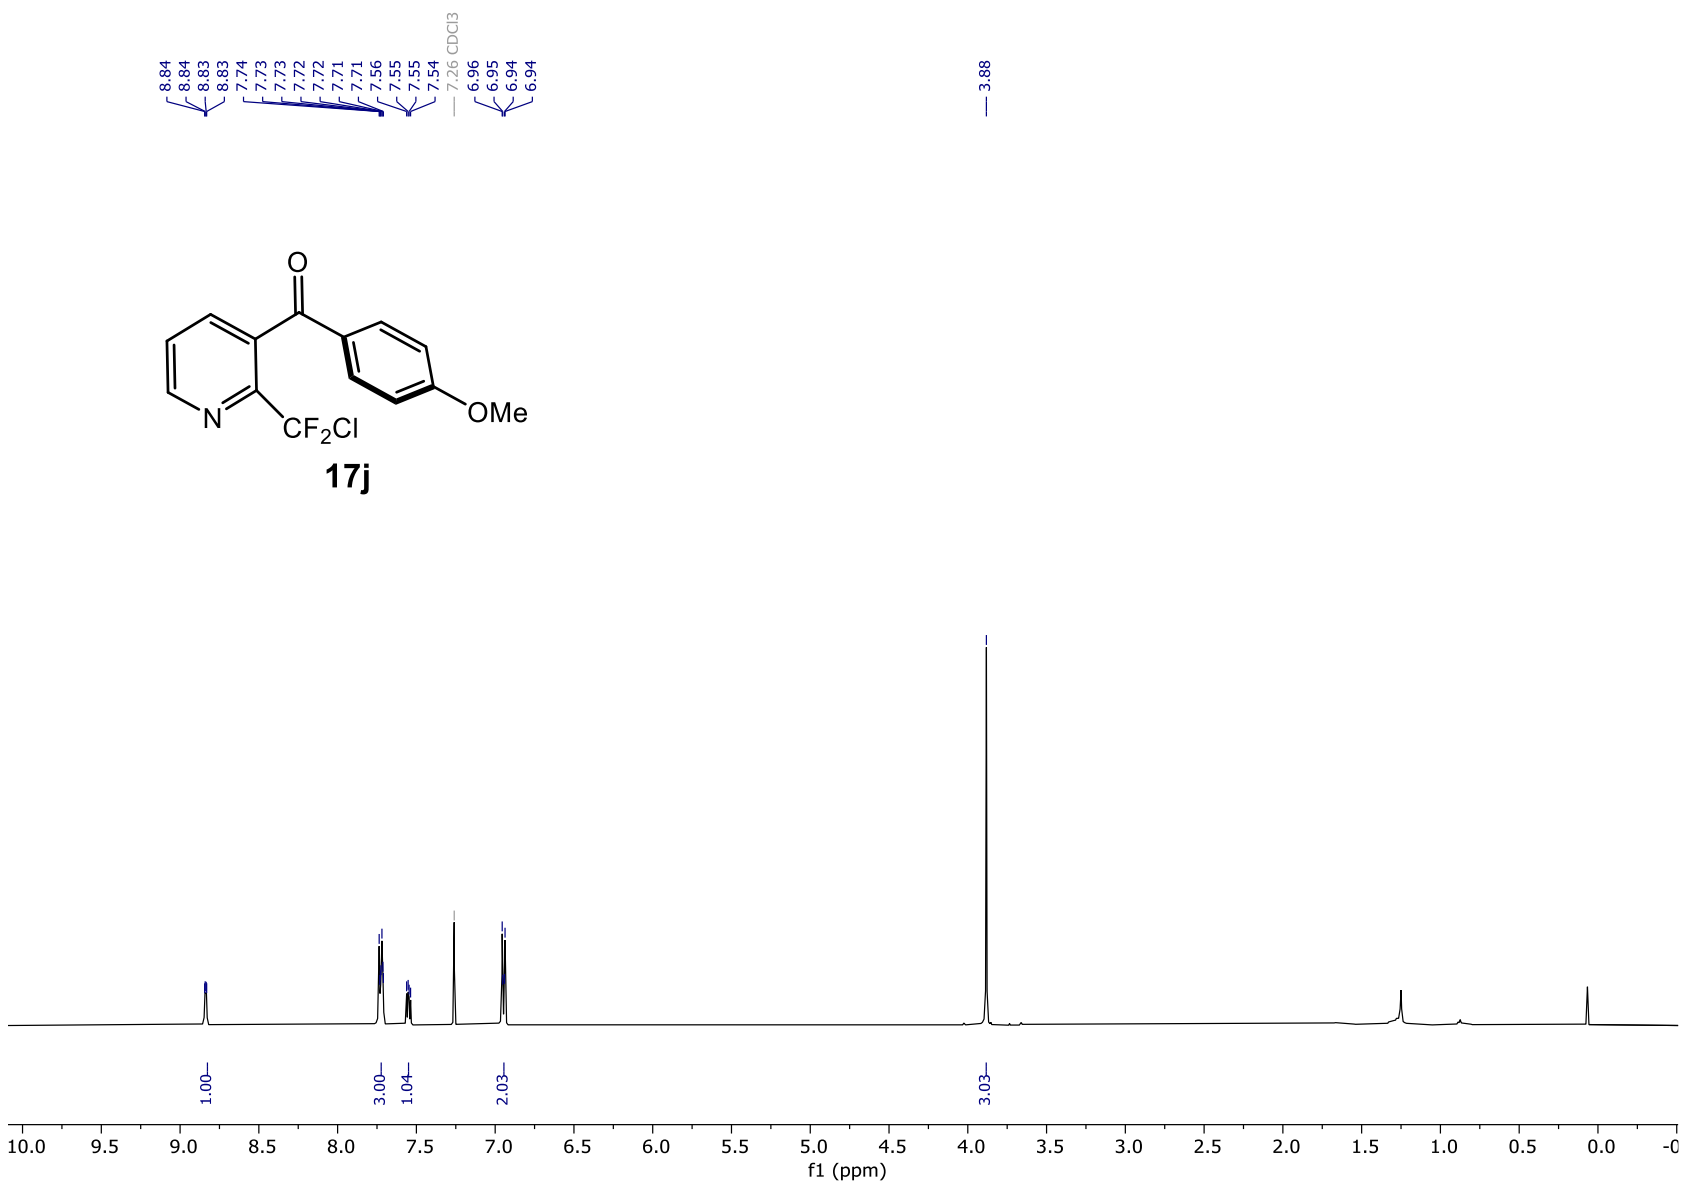

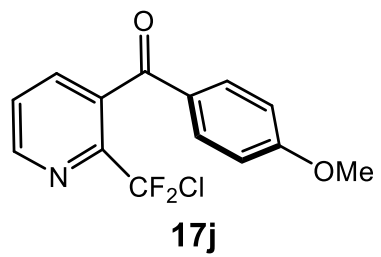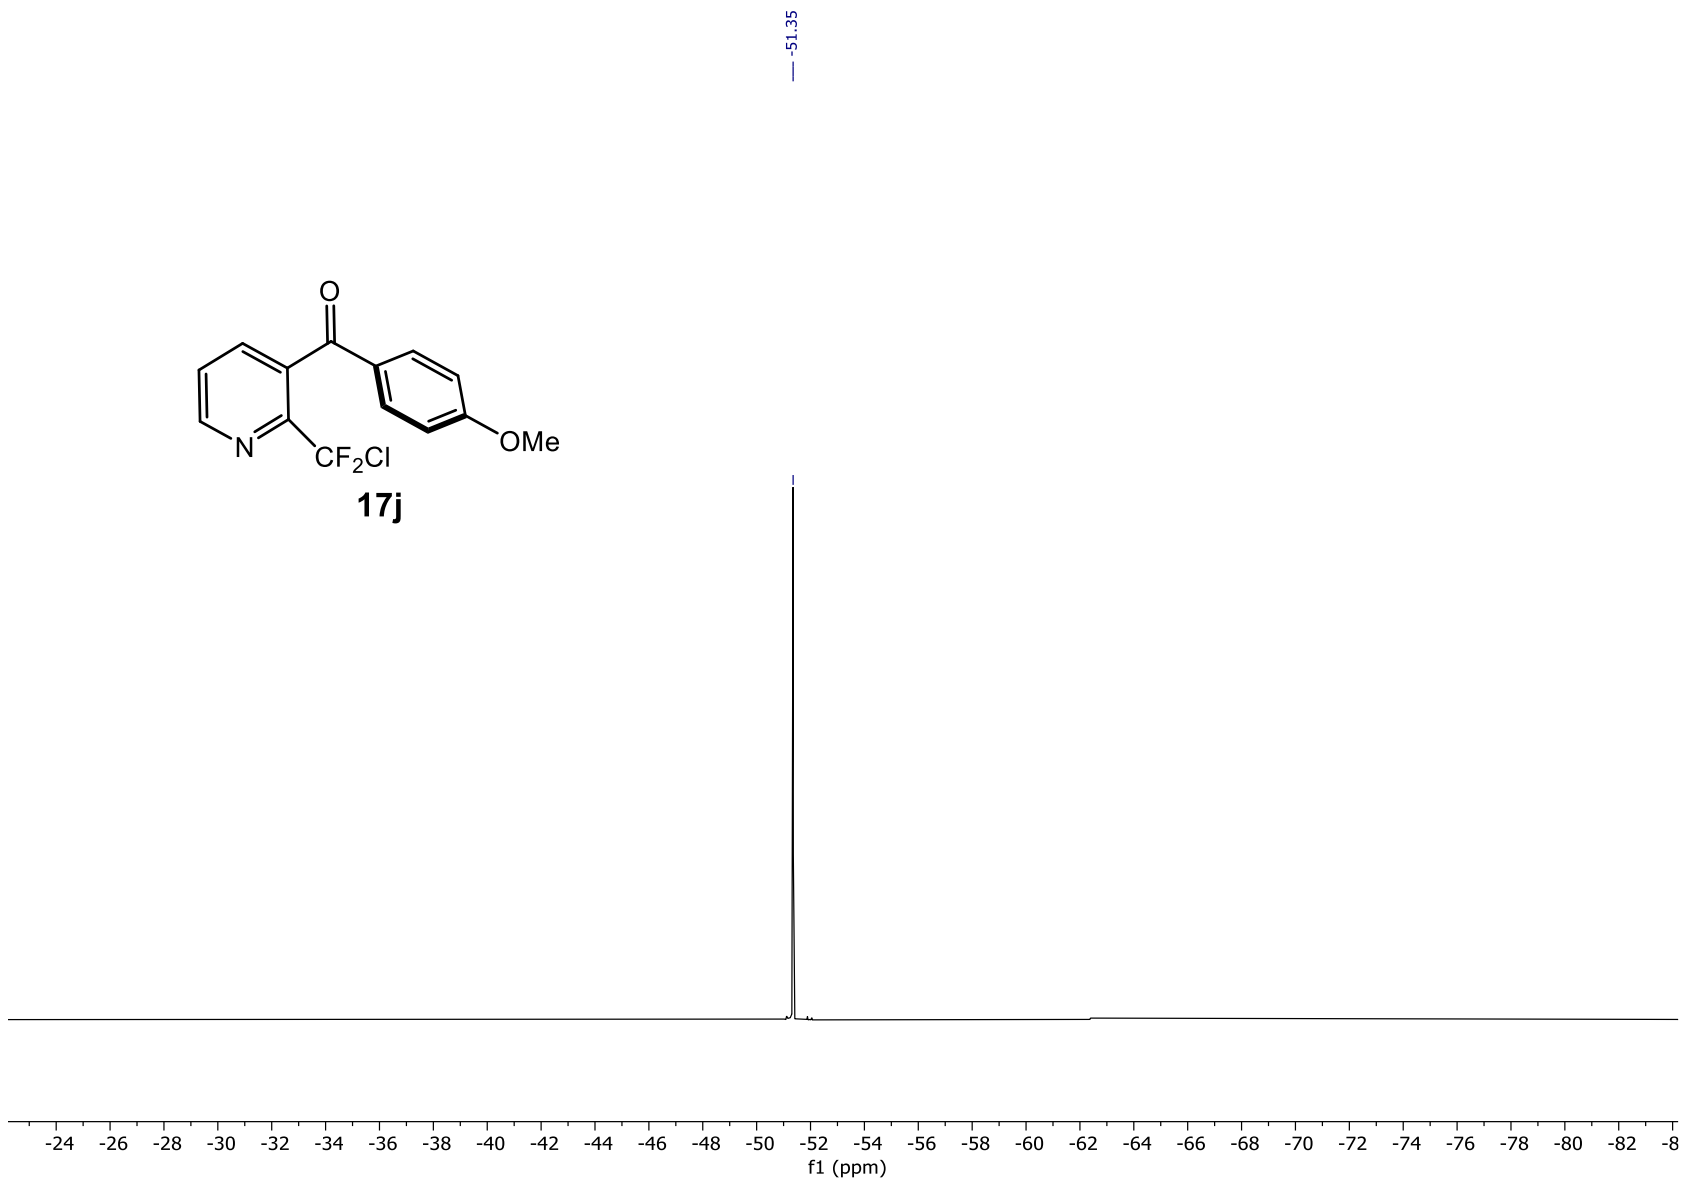

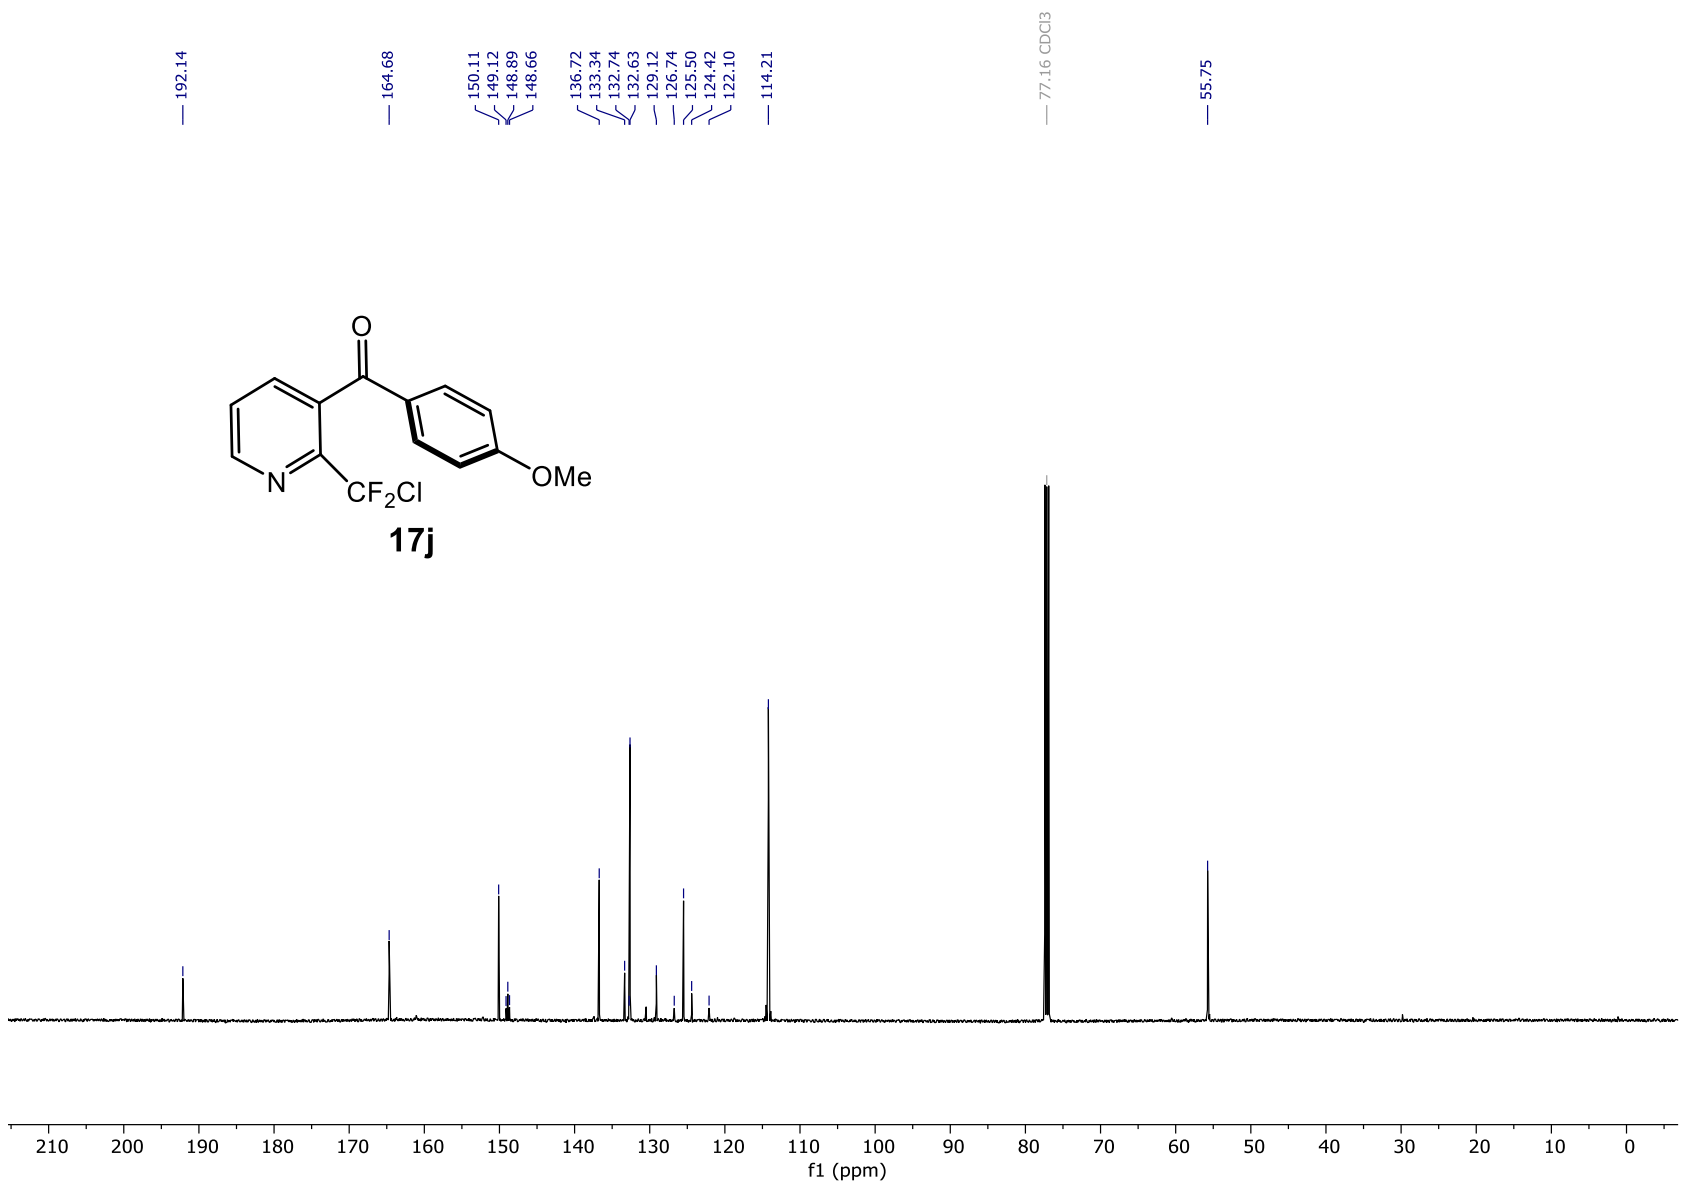

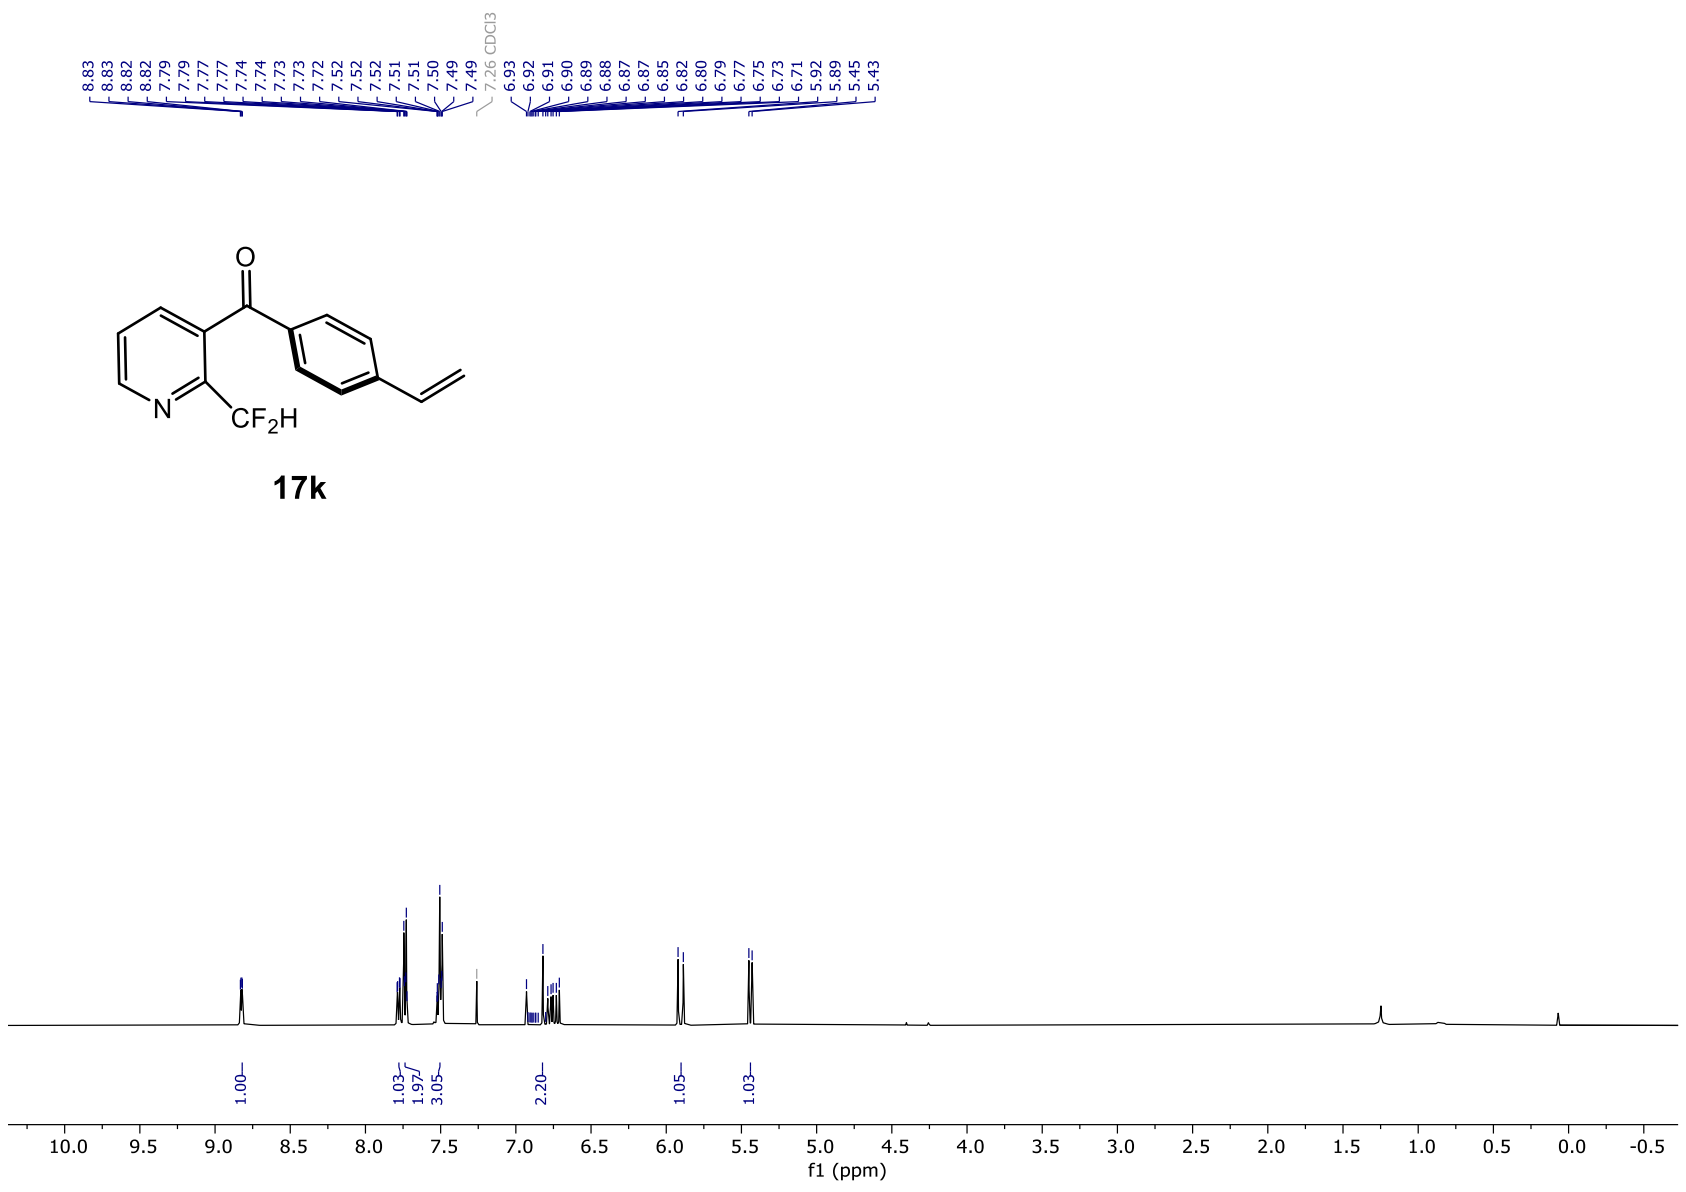

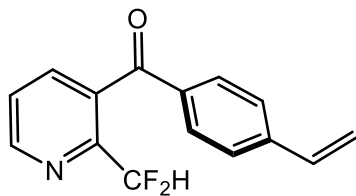

17k

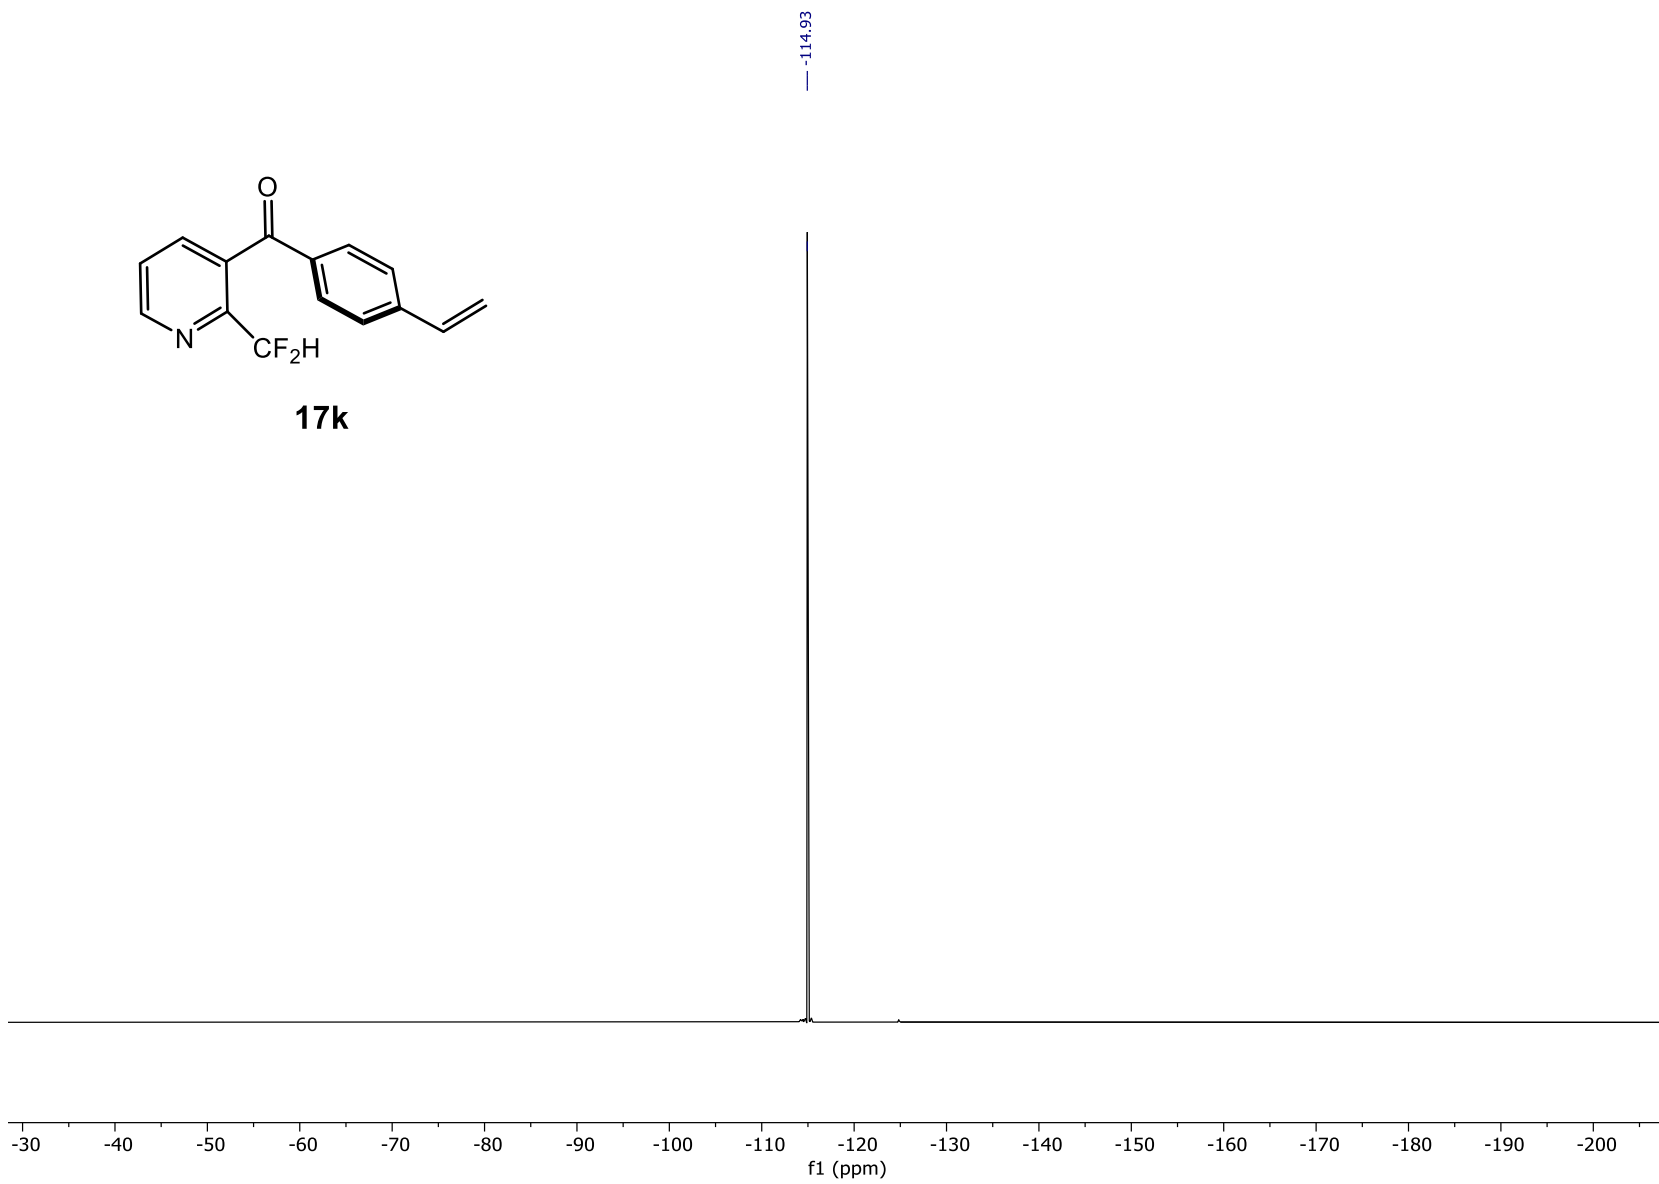

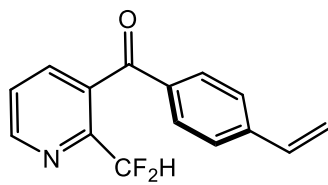

17k

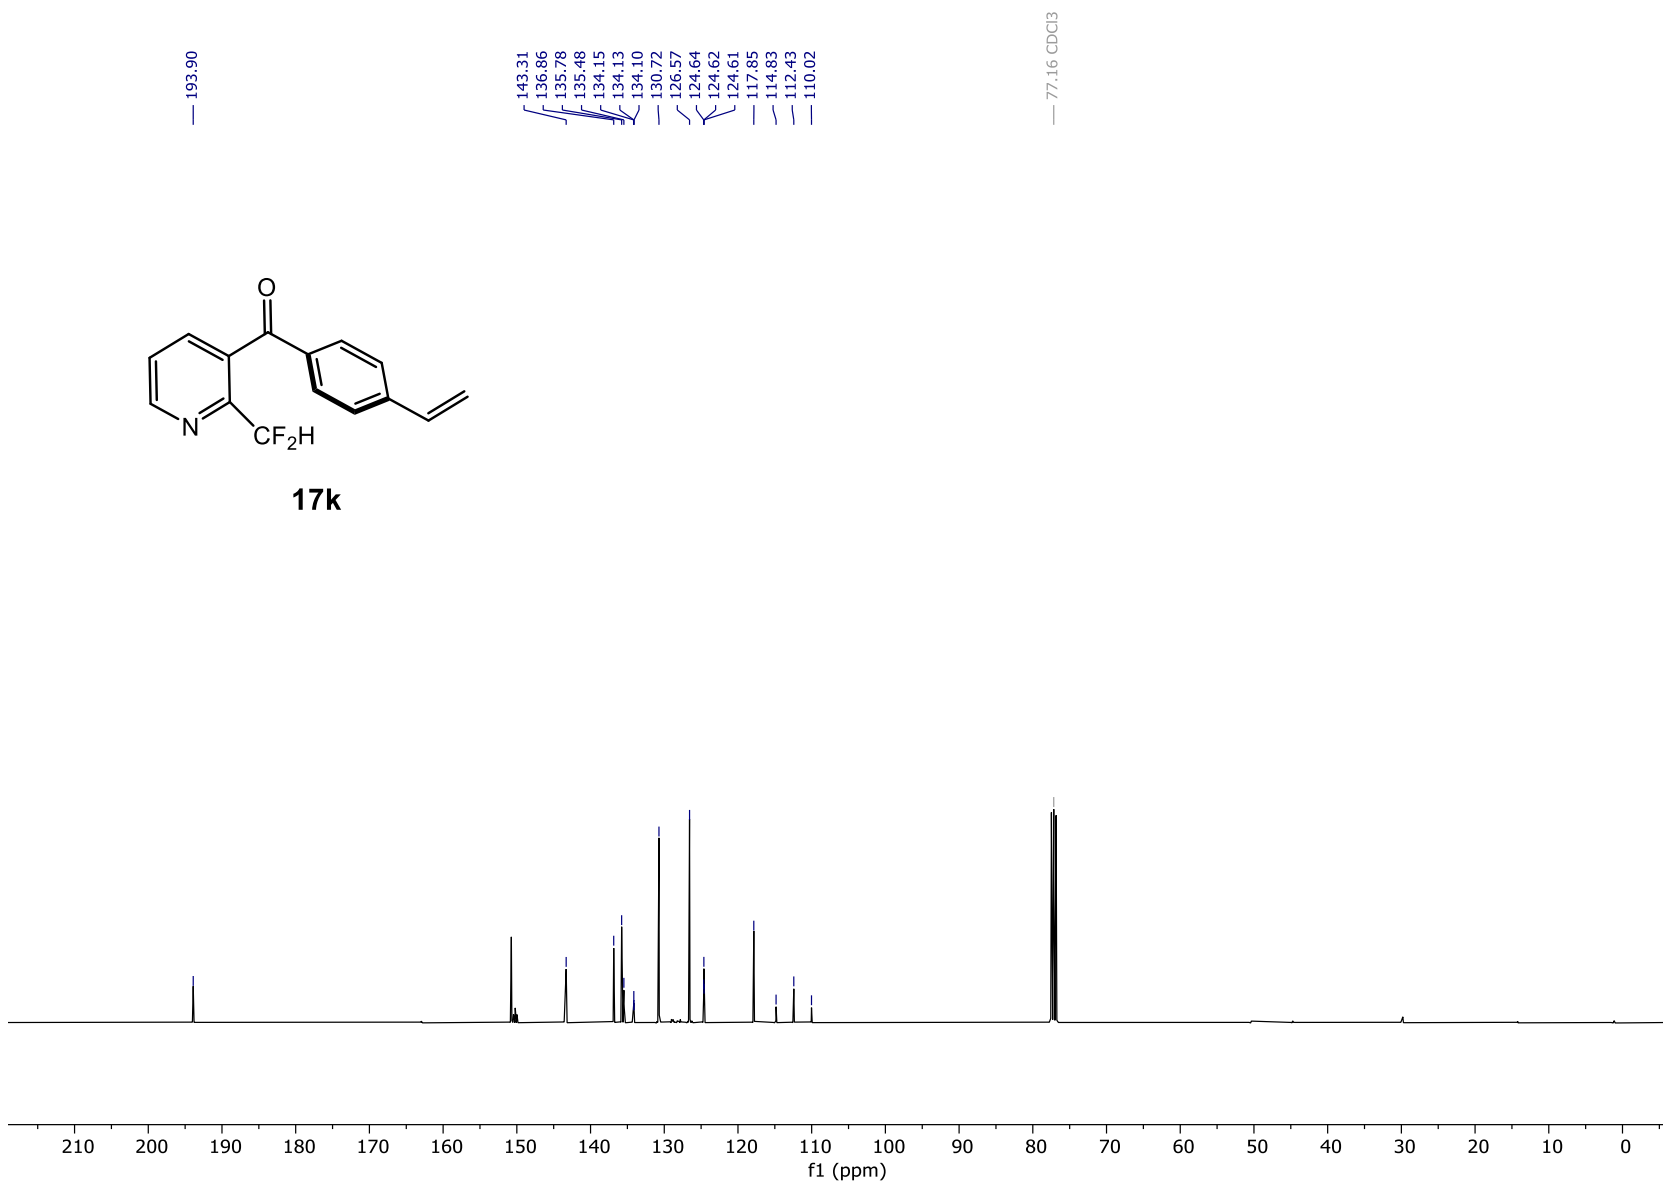

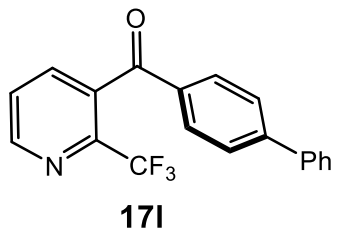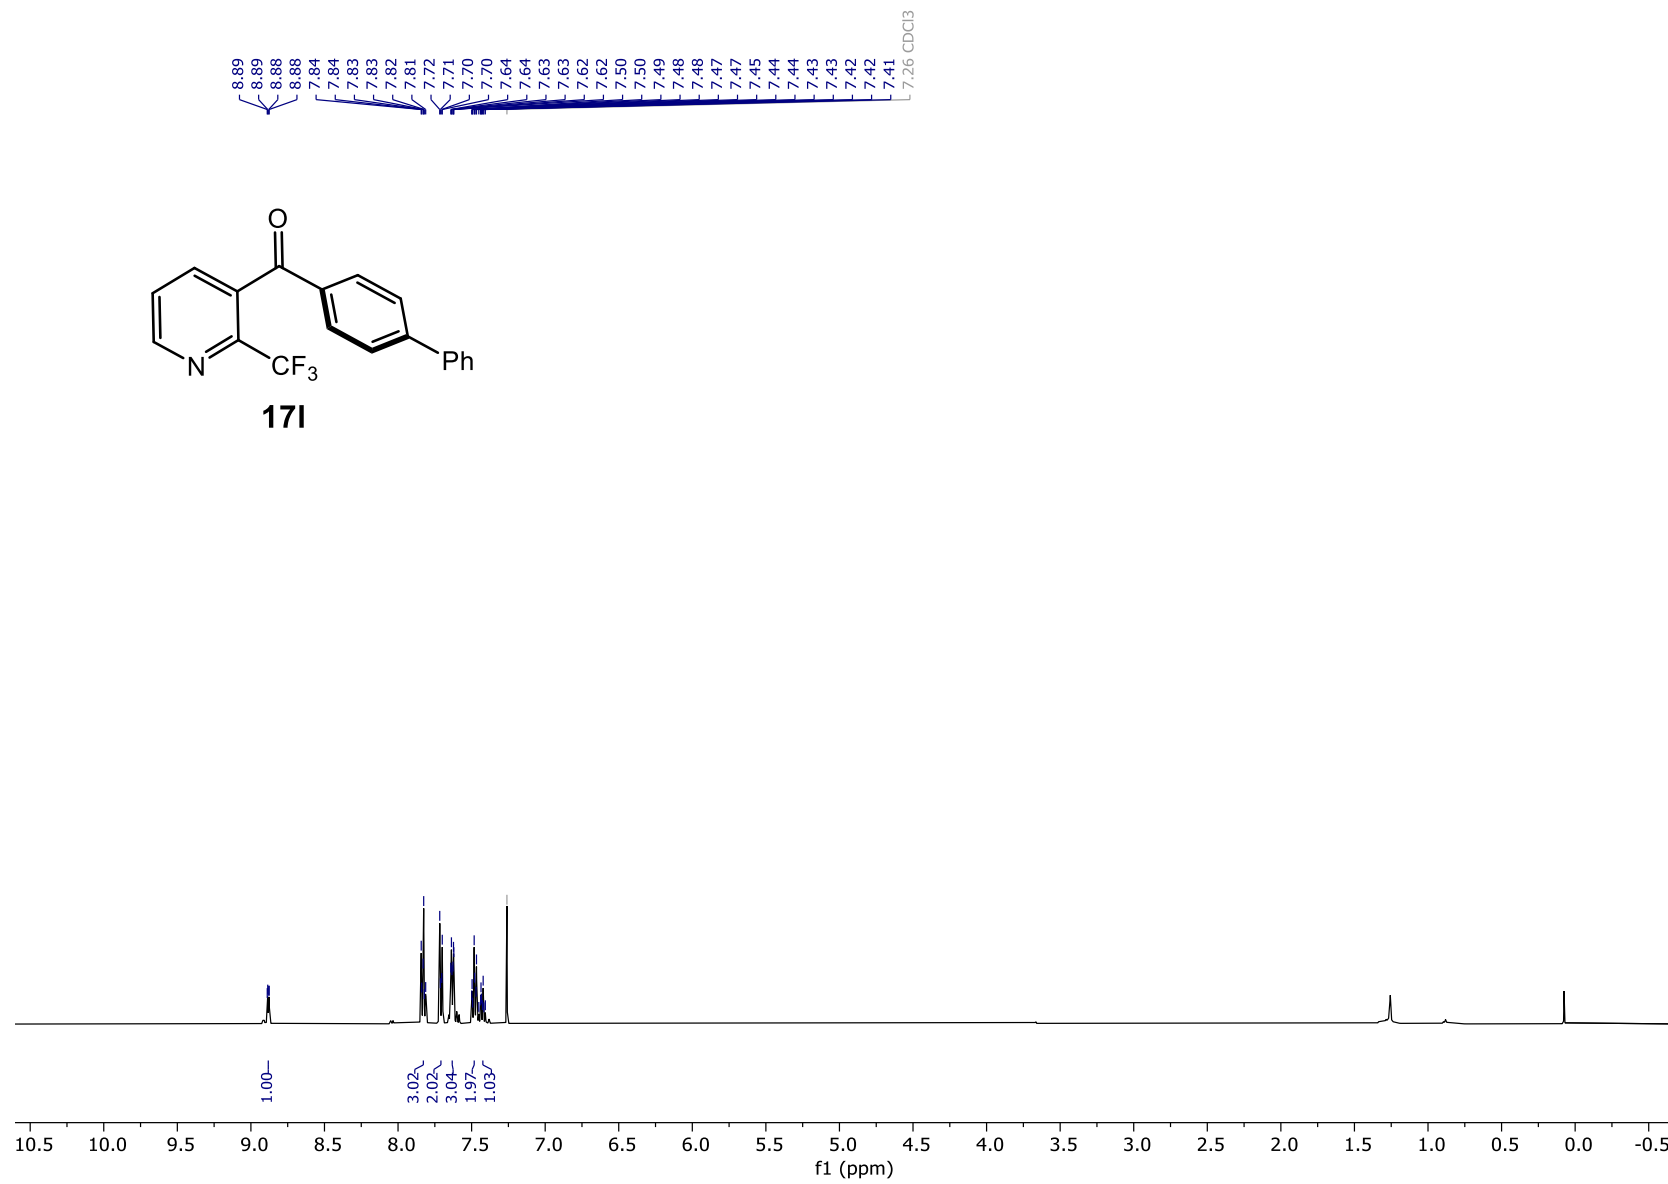

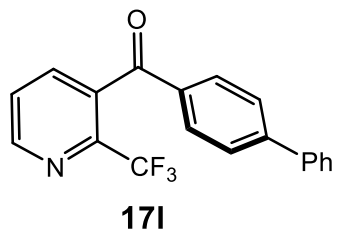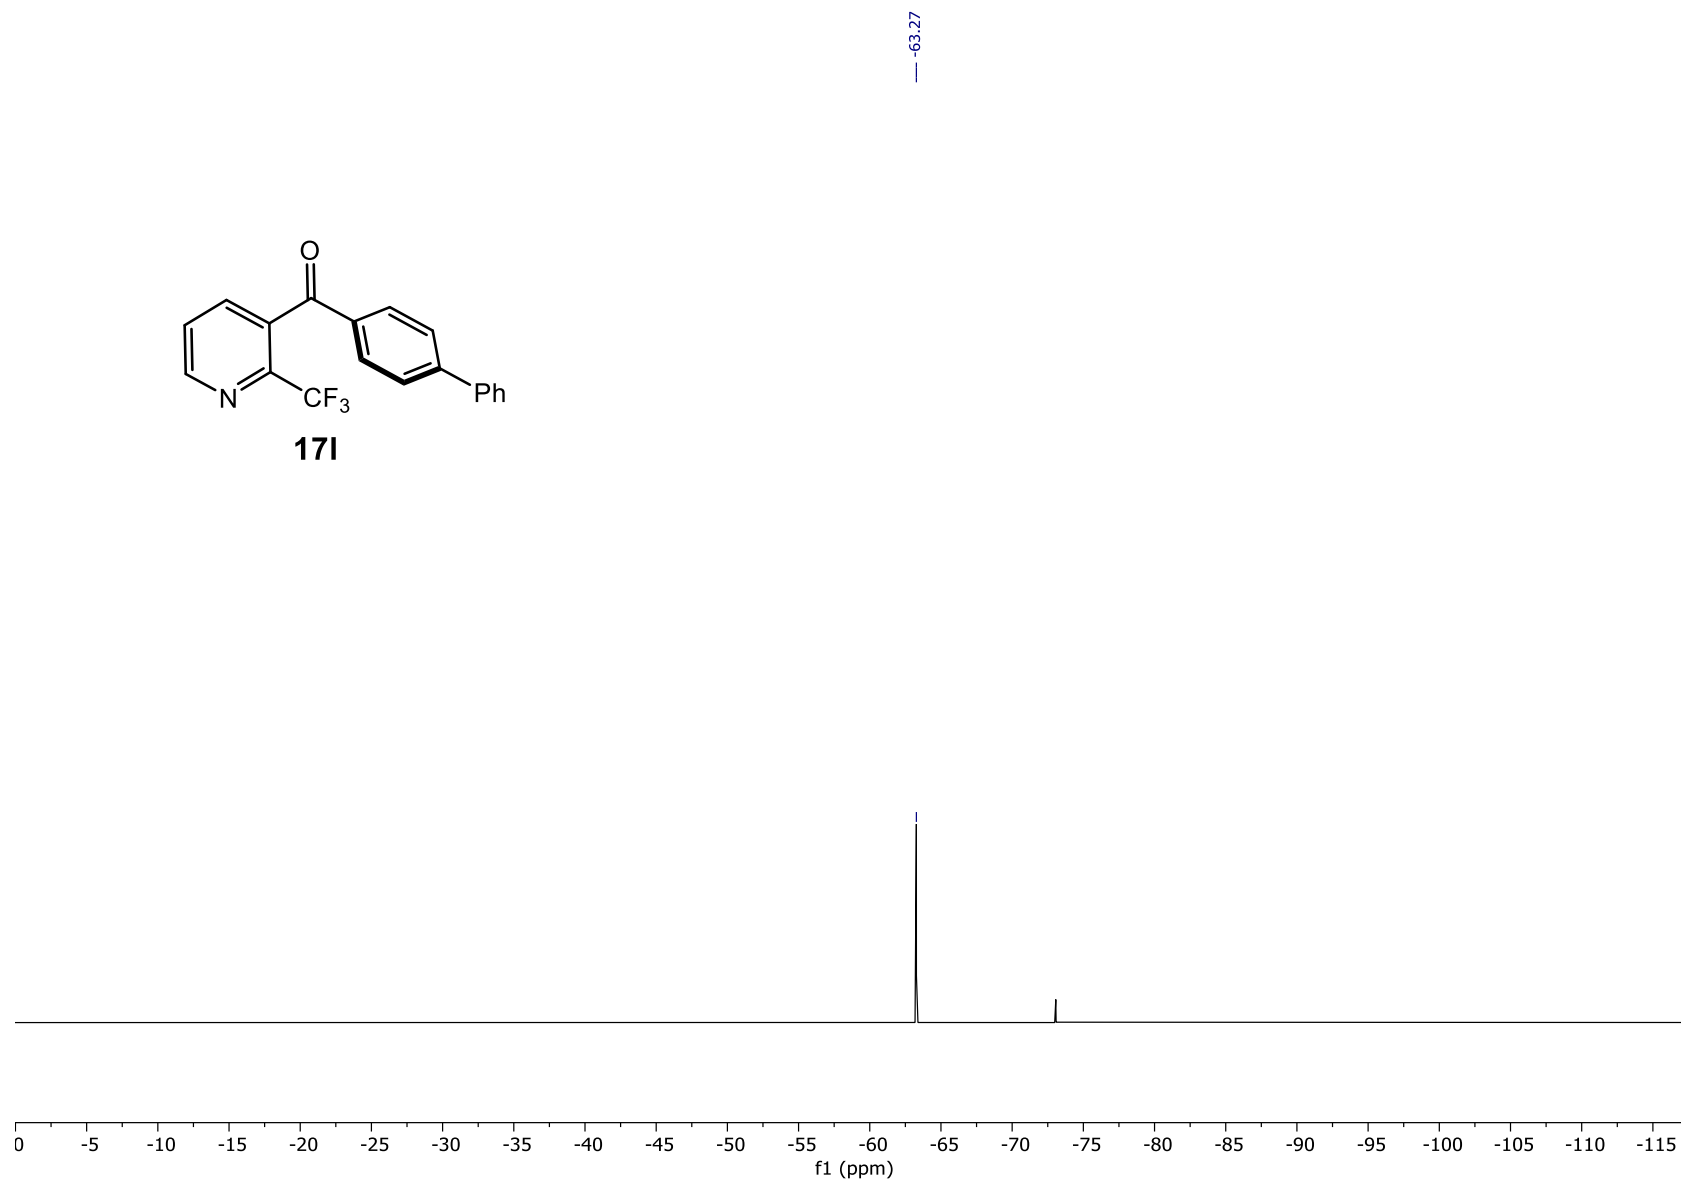

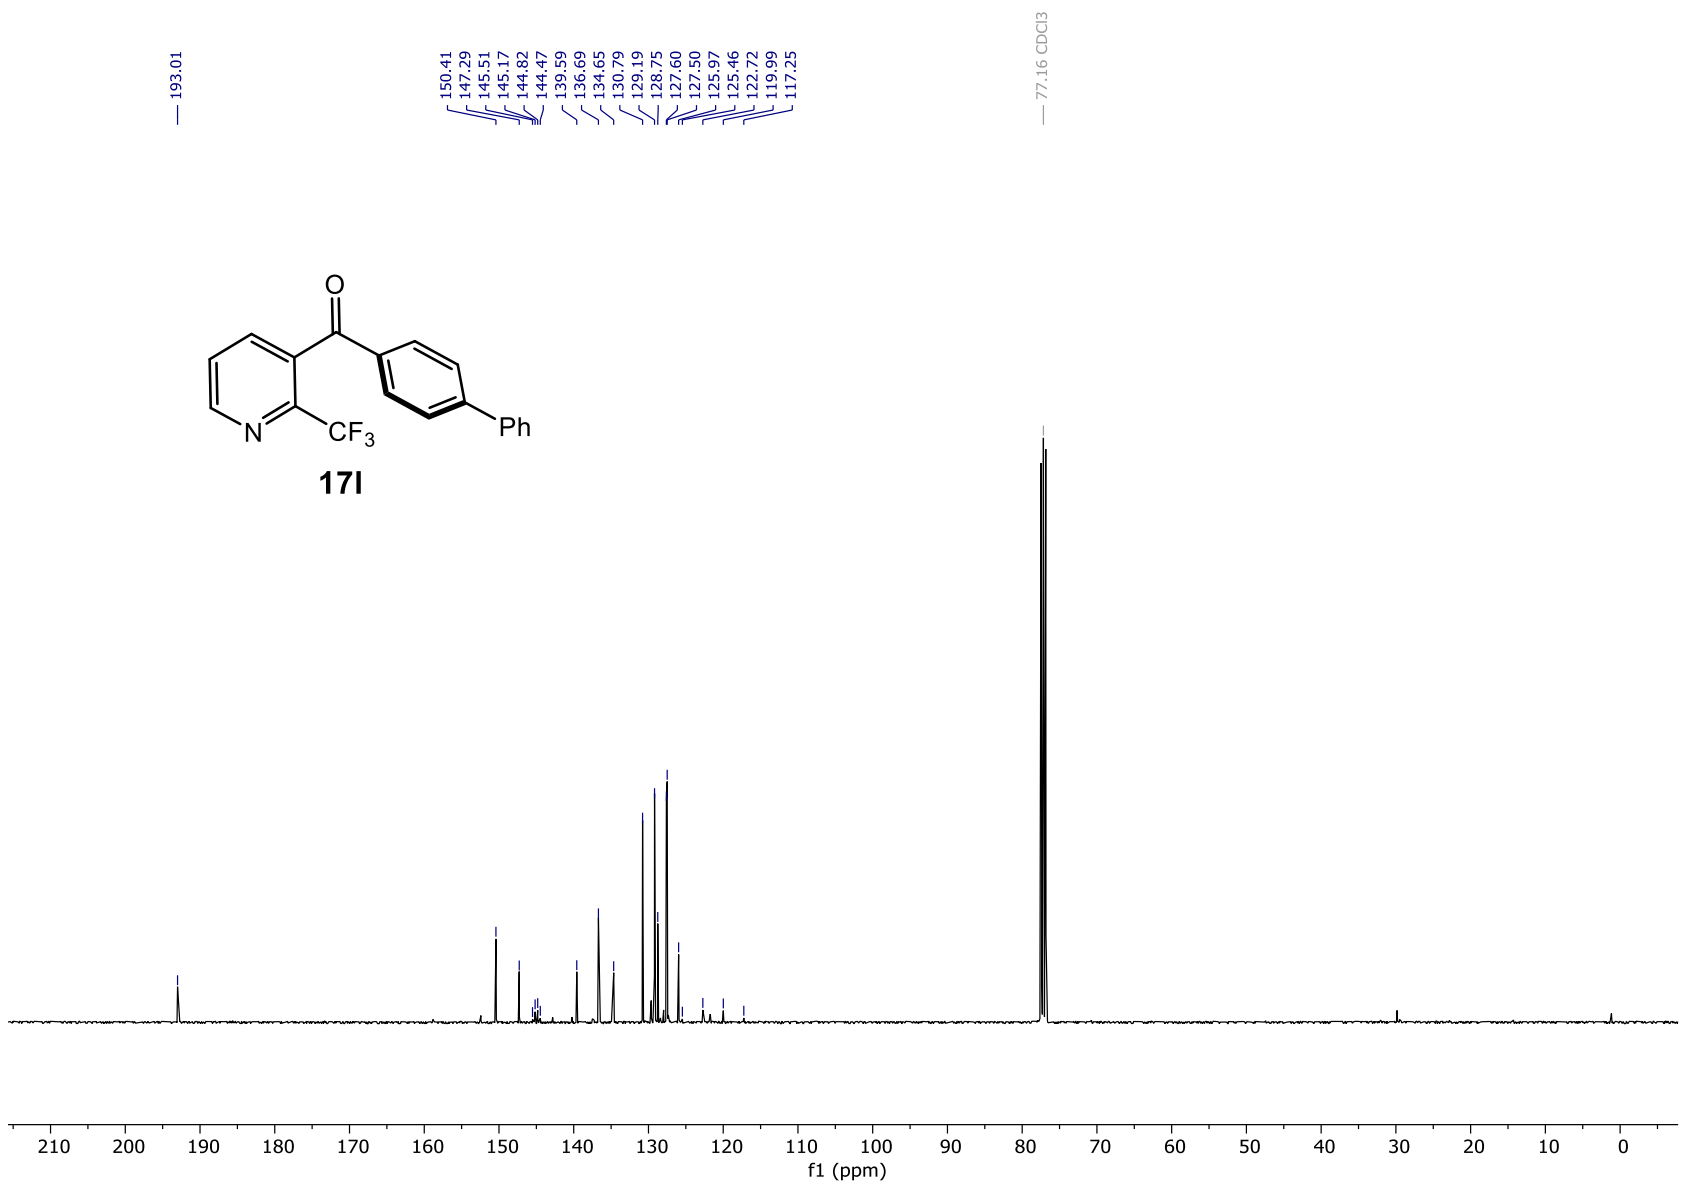

8.87  
8.86  
8.86  
8.85  
7.73  
7.71  
7.71  
7.64  
7.64  
7.64  
7.62  
7.60  
7.59  
7.58  
7.57  
7.56  
— 7.26 CDCl<sub>3</sub>

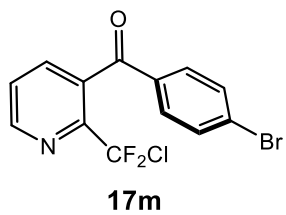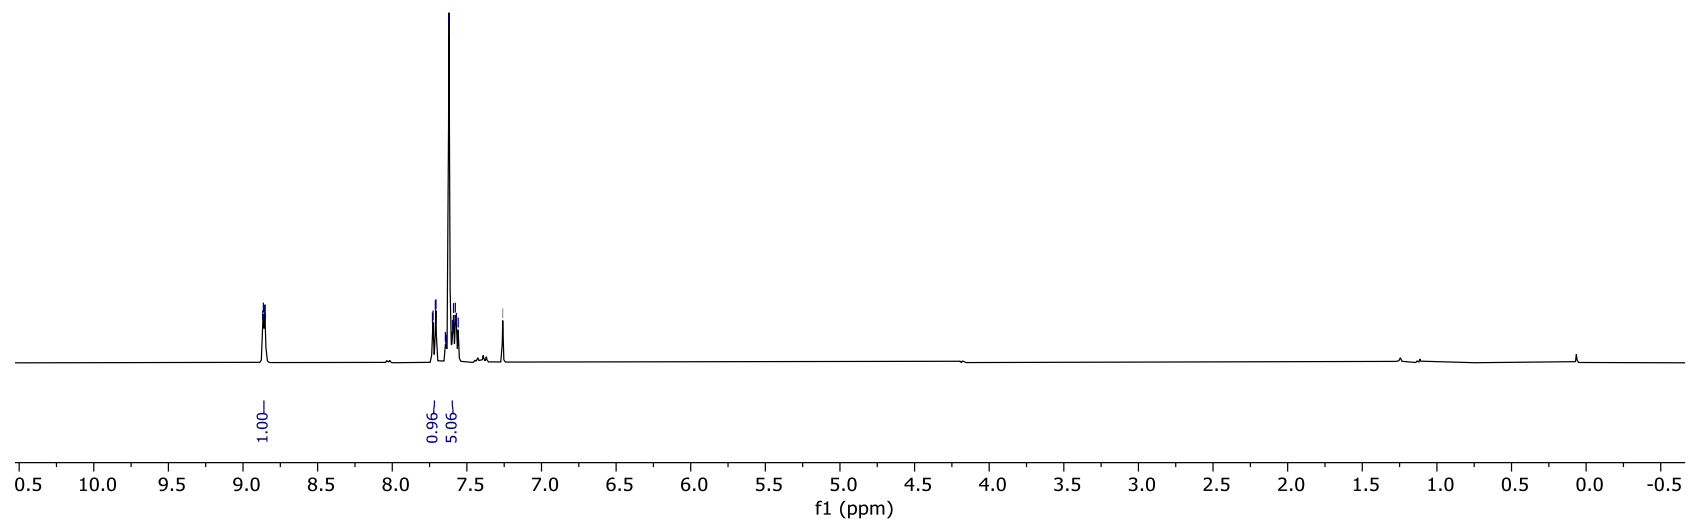

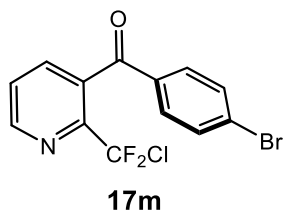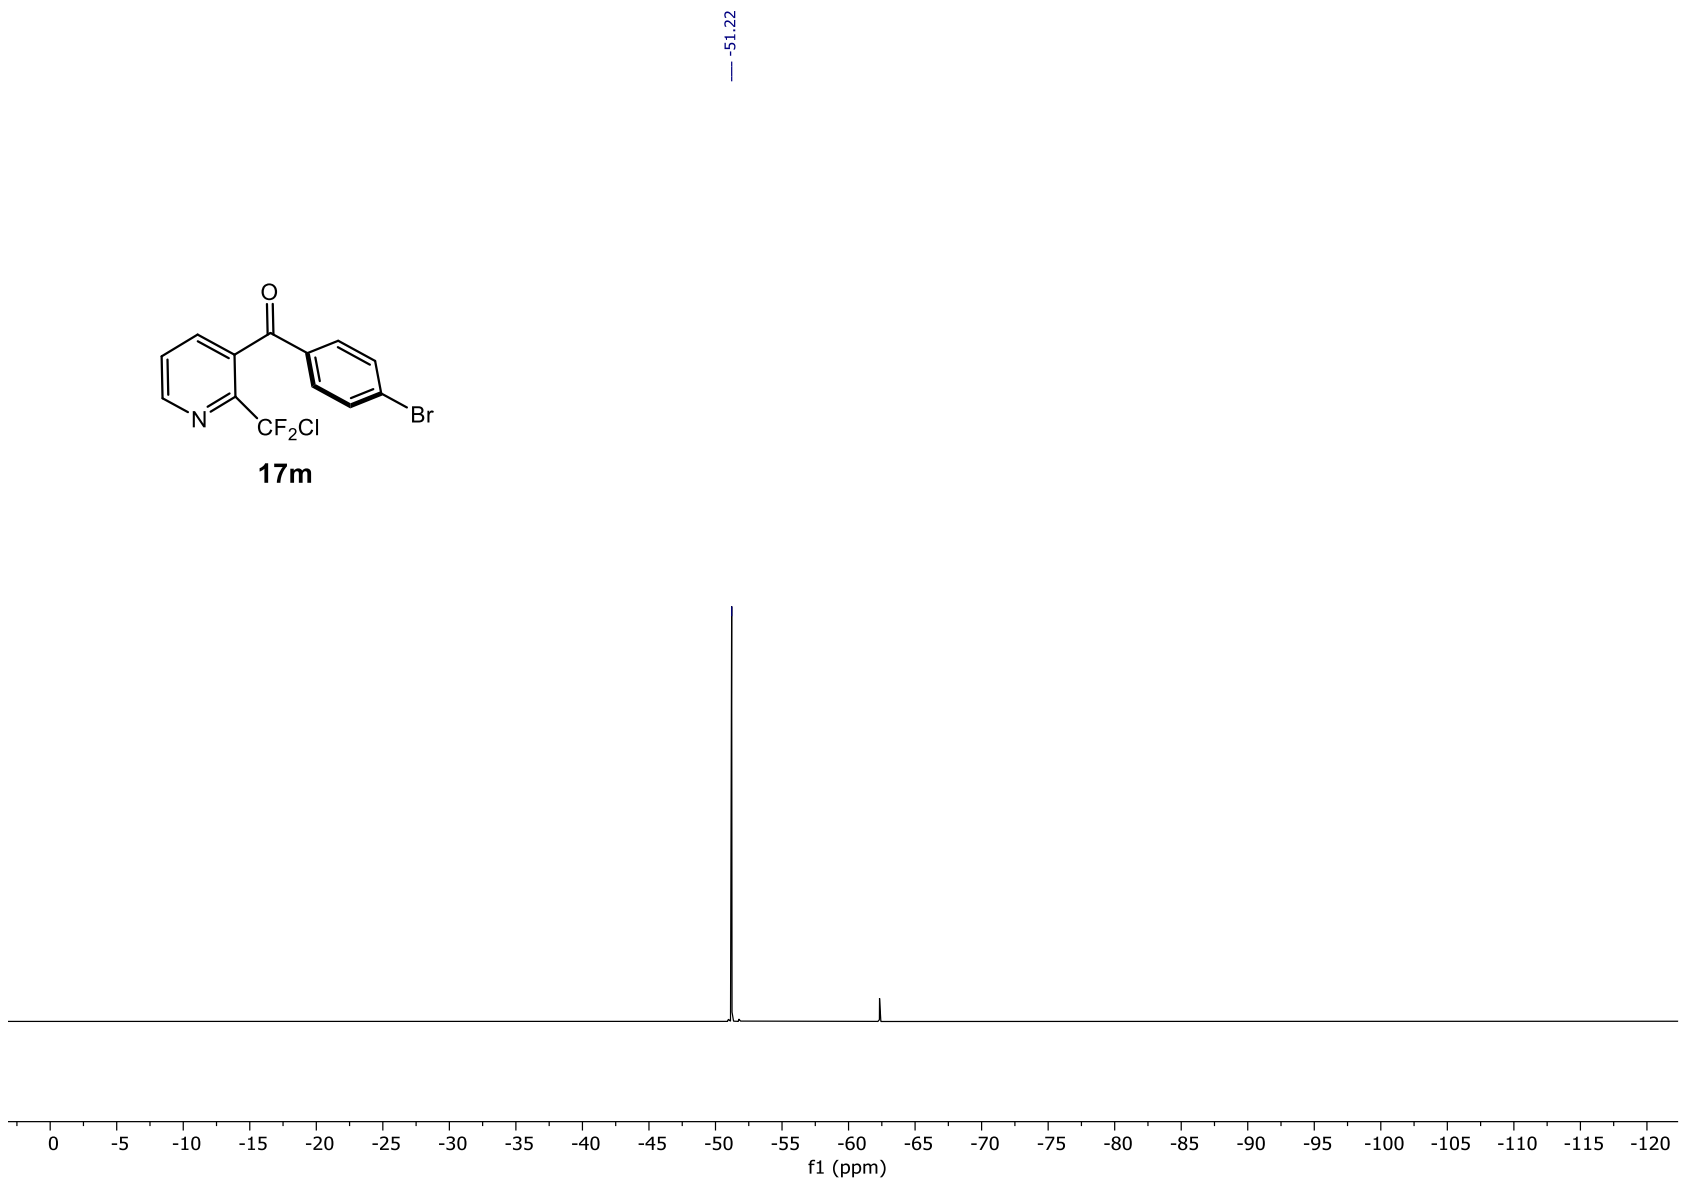

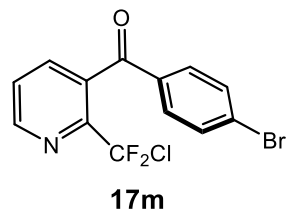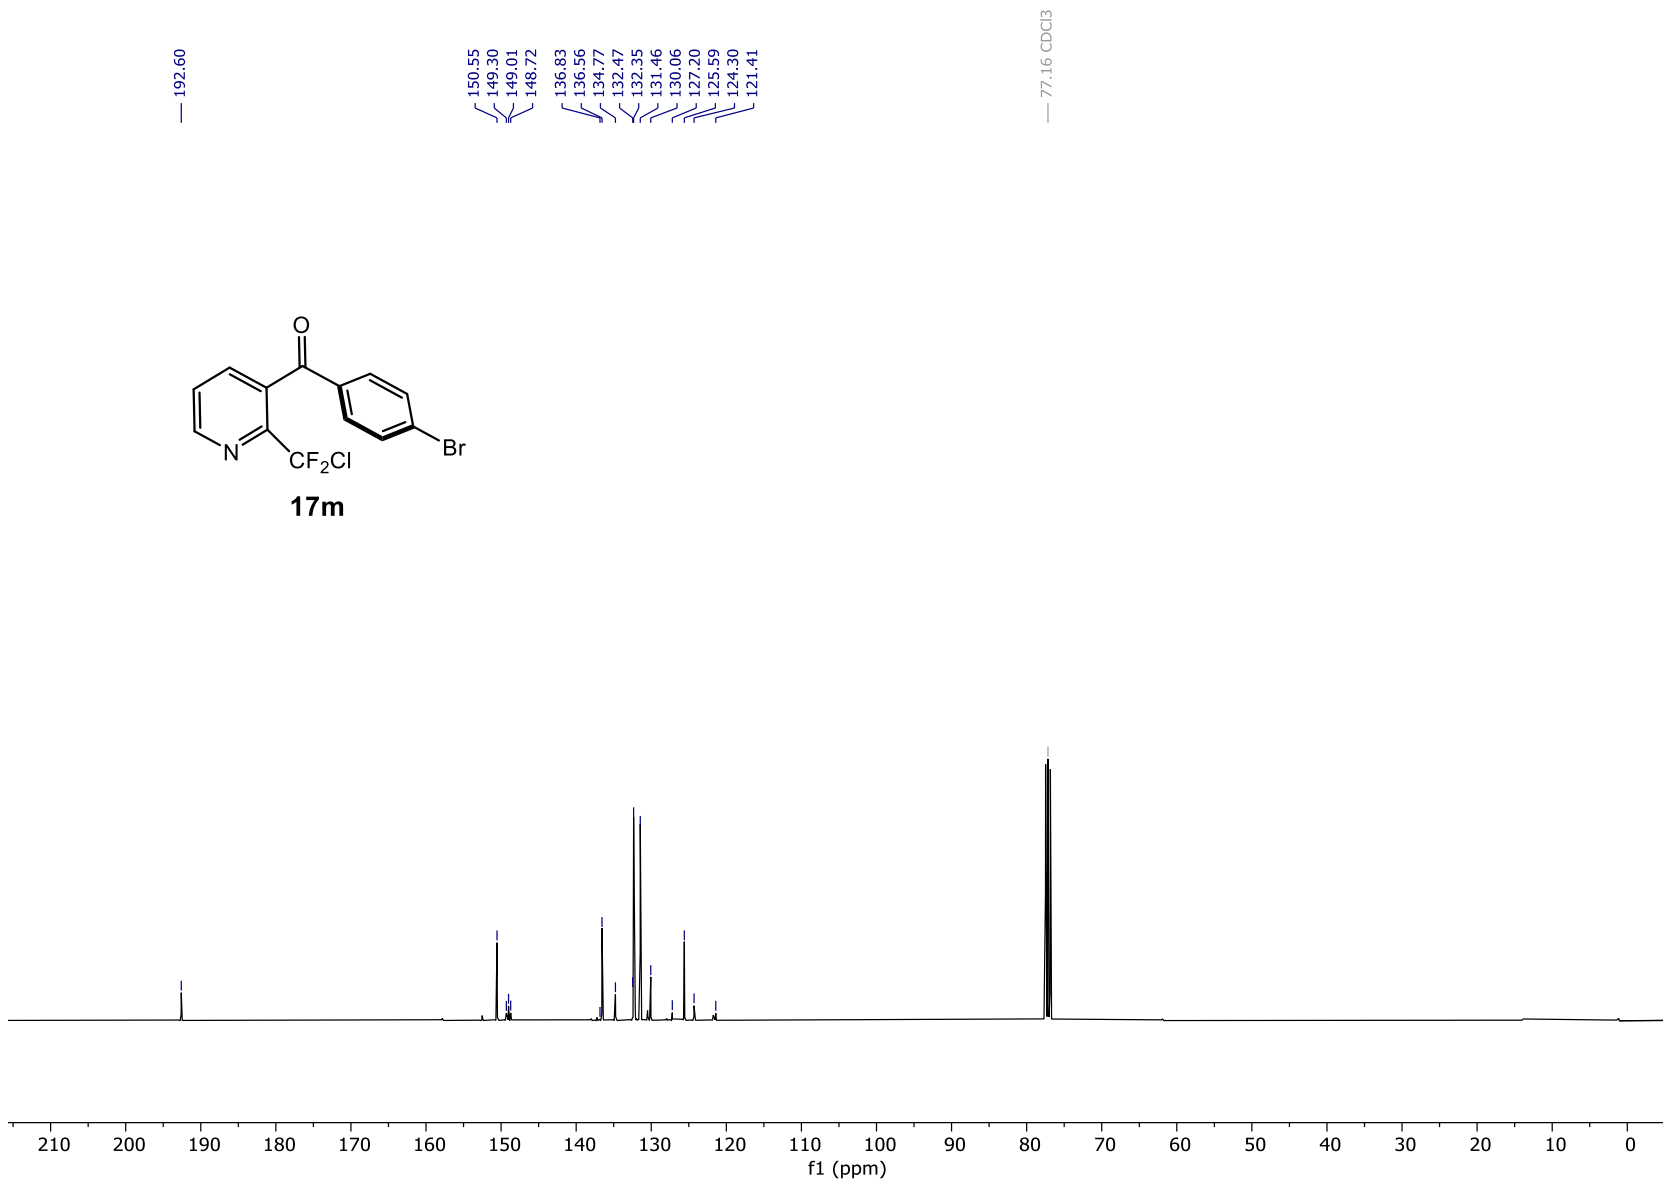

8.83  
8.83  
8.82  
8.82  
7.99  
7.98  
7.97  
7.96  
7.96  
7.94  
7.77  
7.77  
7.75  
7.75  
7.60  
7.59  
7.59  
7.58  
7.26 CDCl3  
7.06  
7.04  
7.04  
7.04  
7.04  
7.03  
7.02  
6.85  
6.85  
6.83  
6.83  
6.82  
6.81

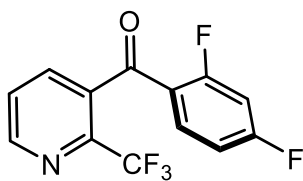

**17n**

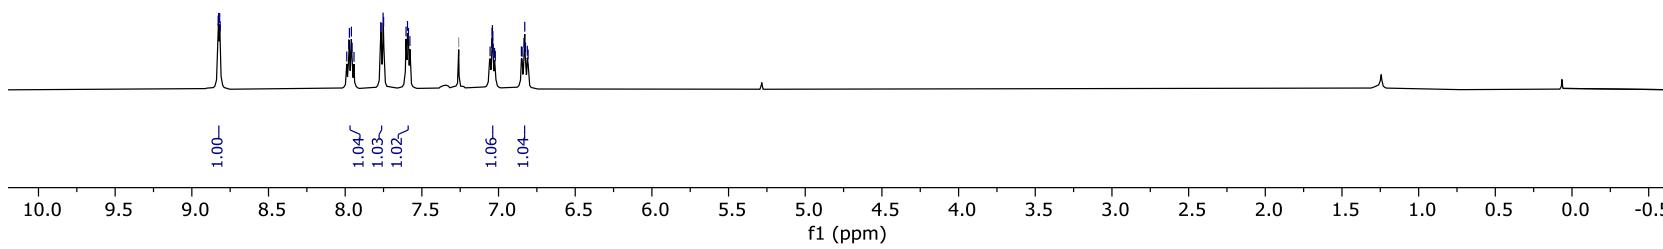

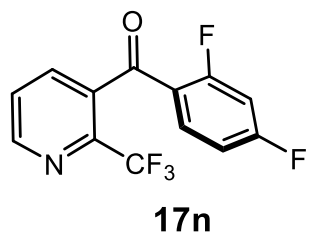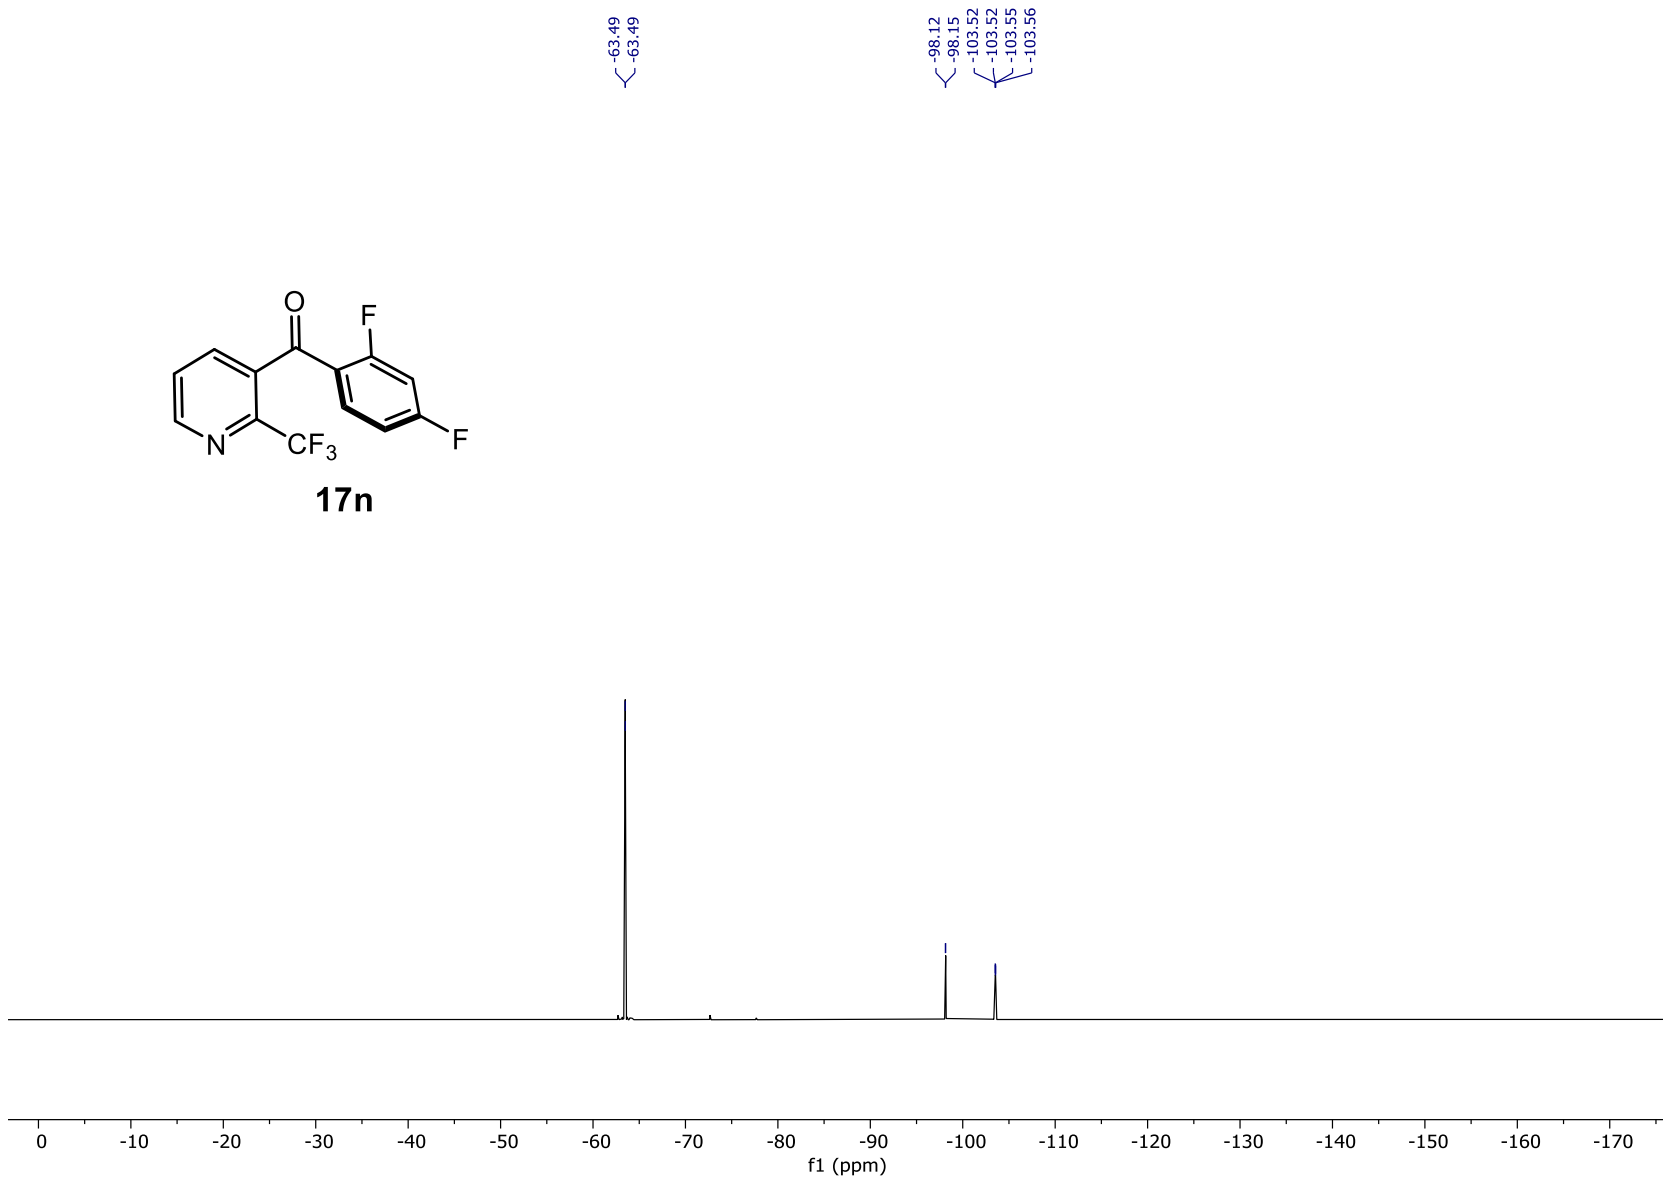

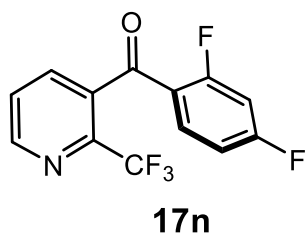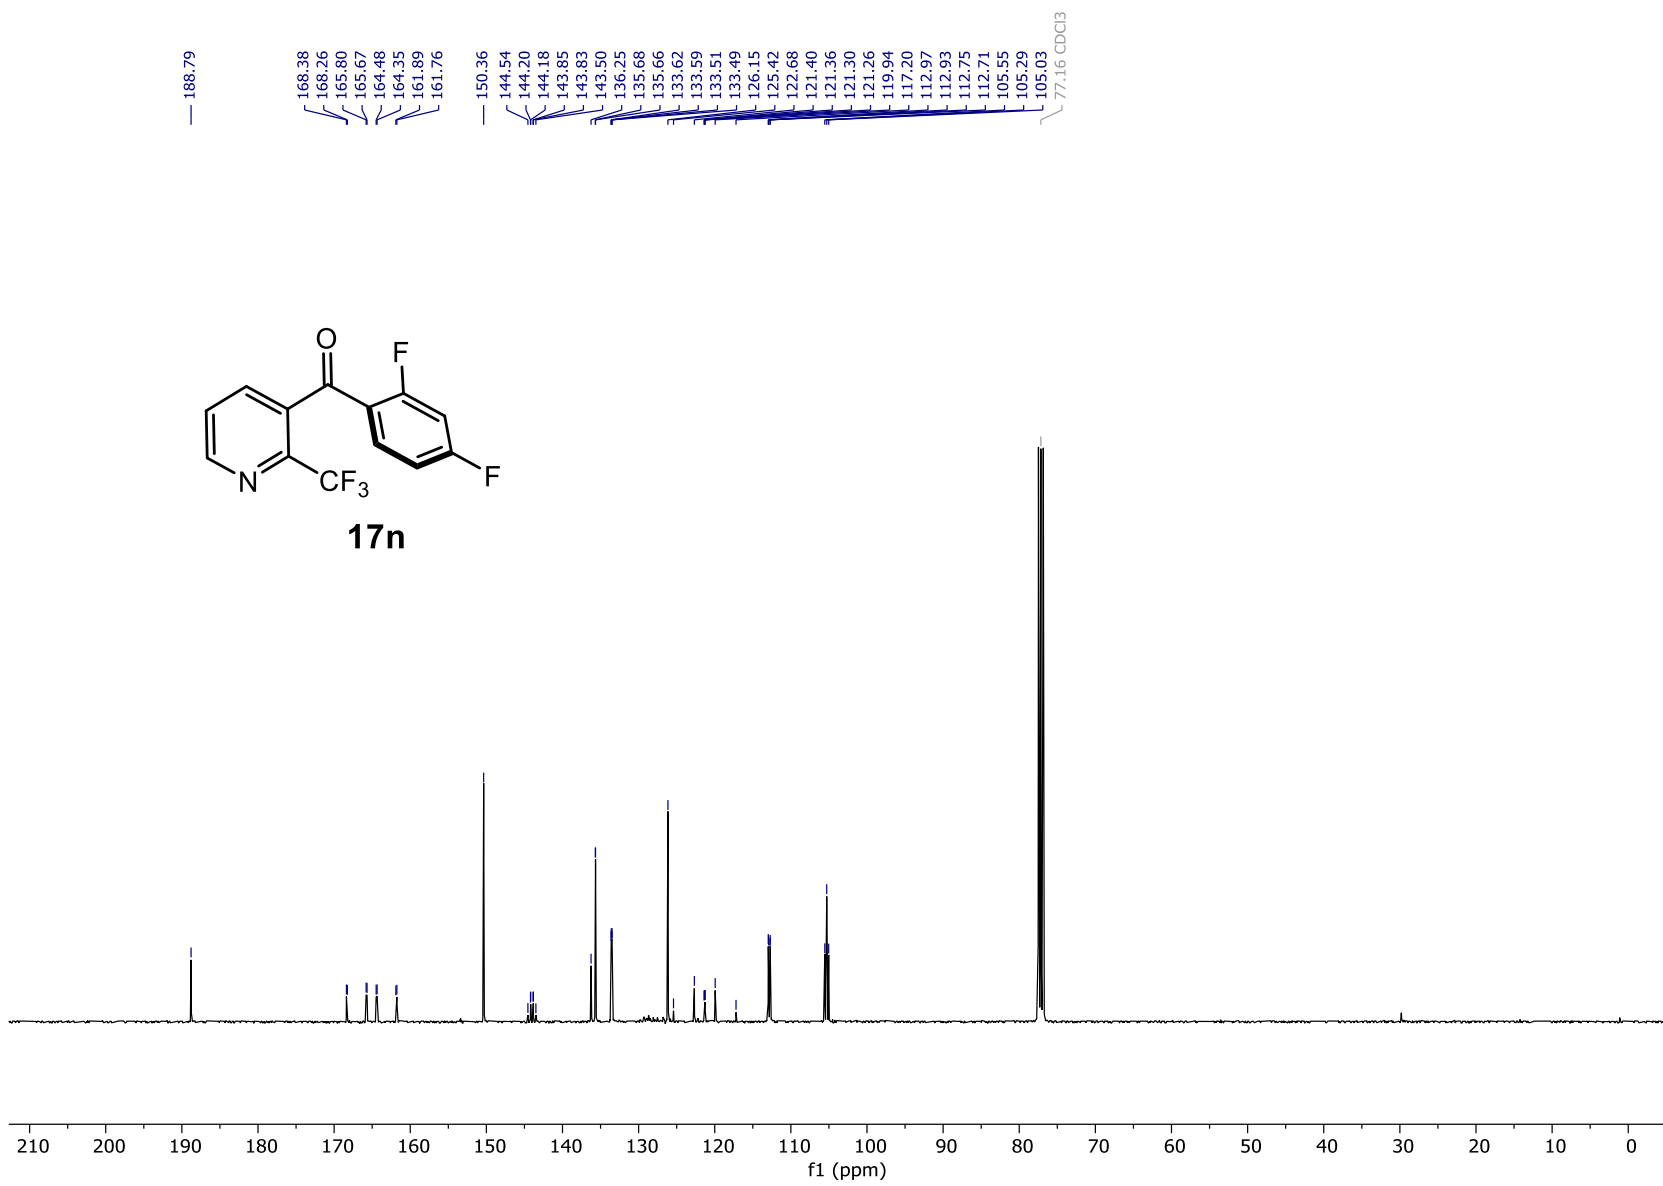

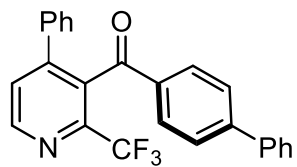

17o

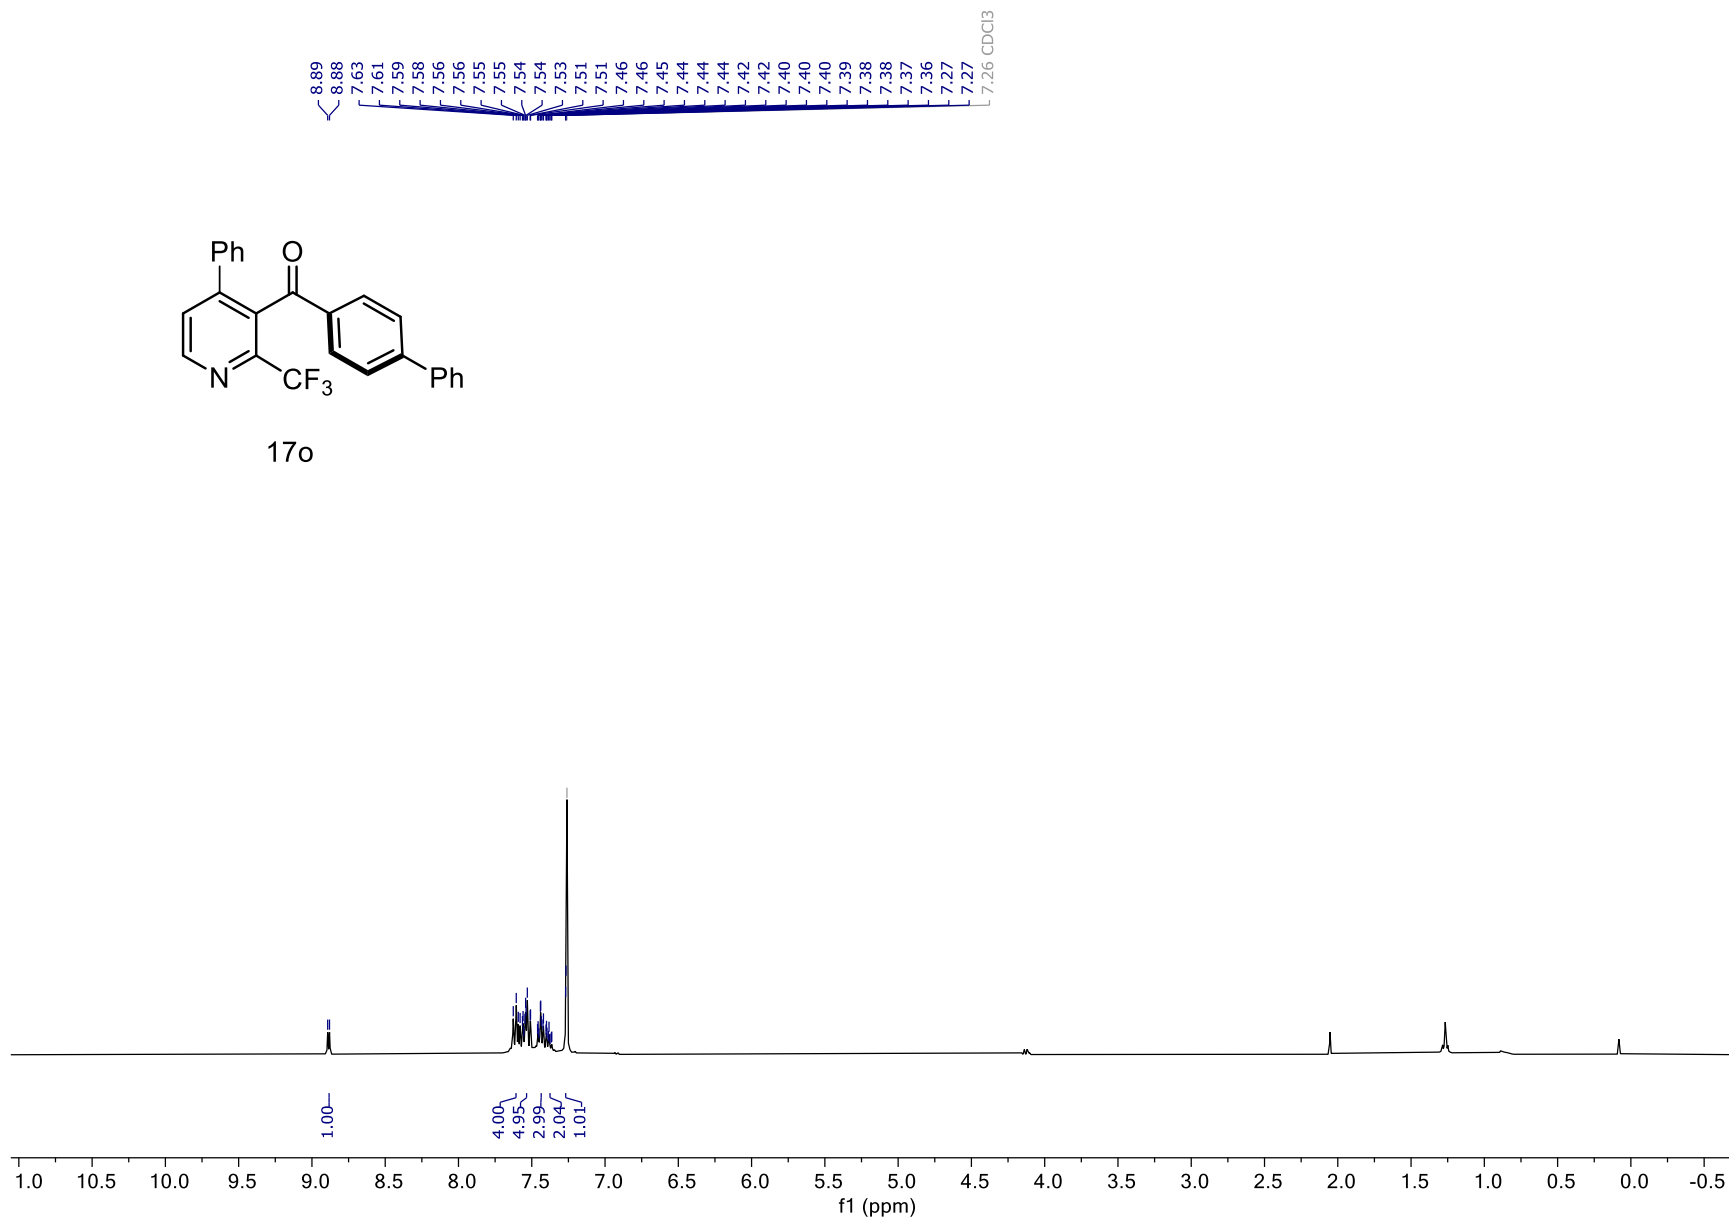

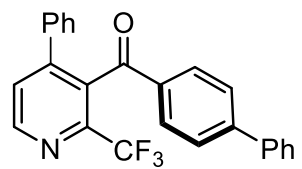

17o

-62.46

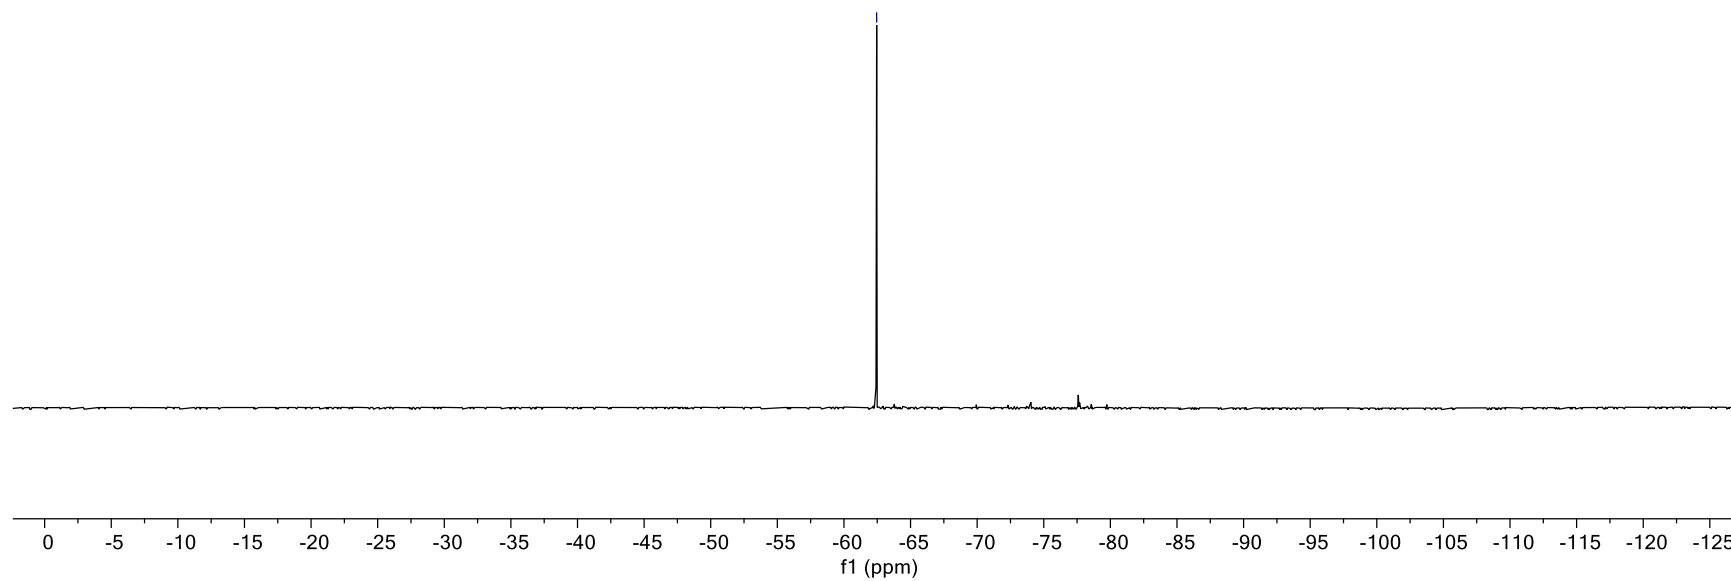

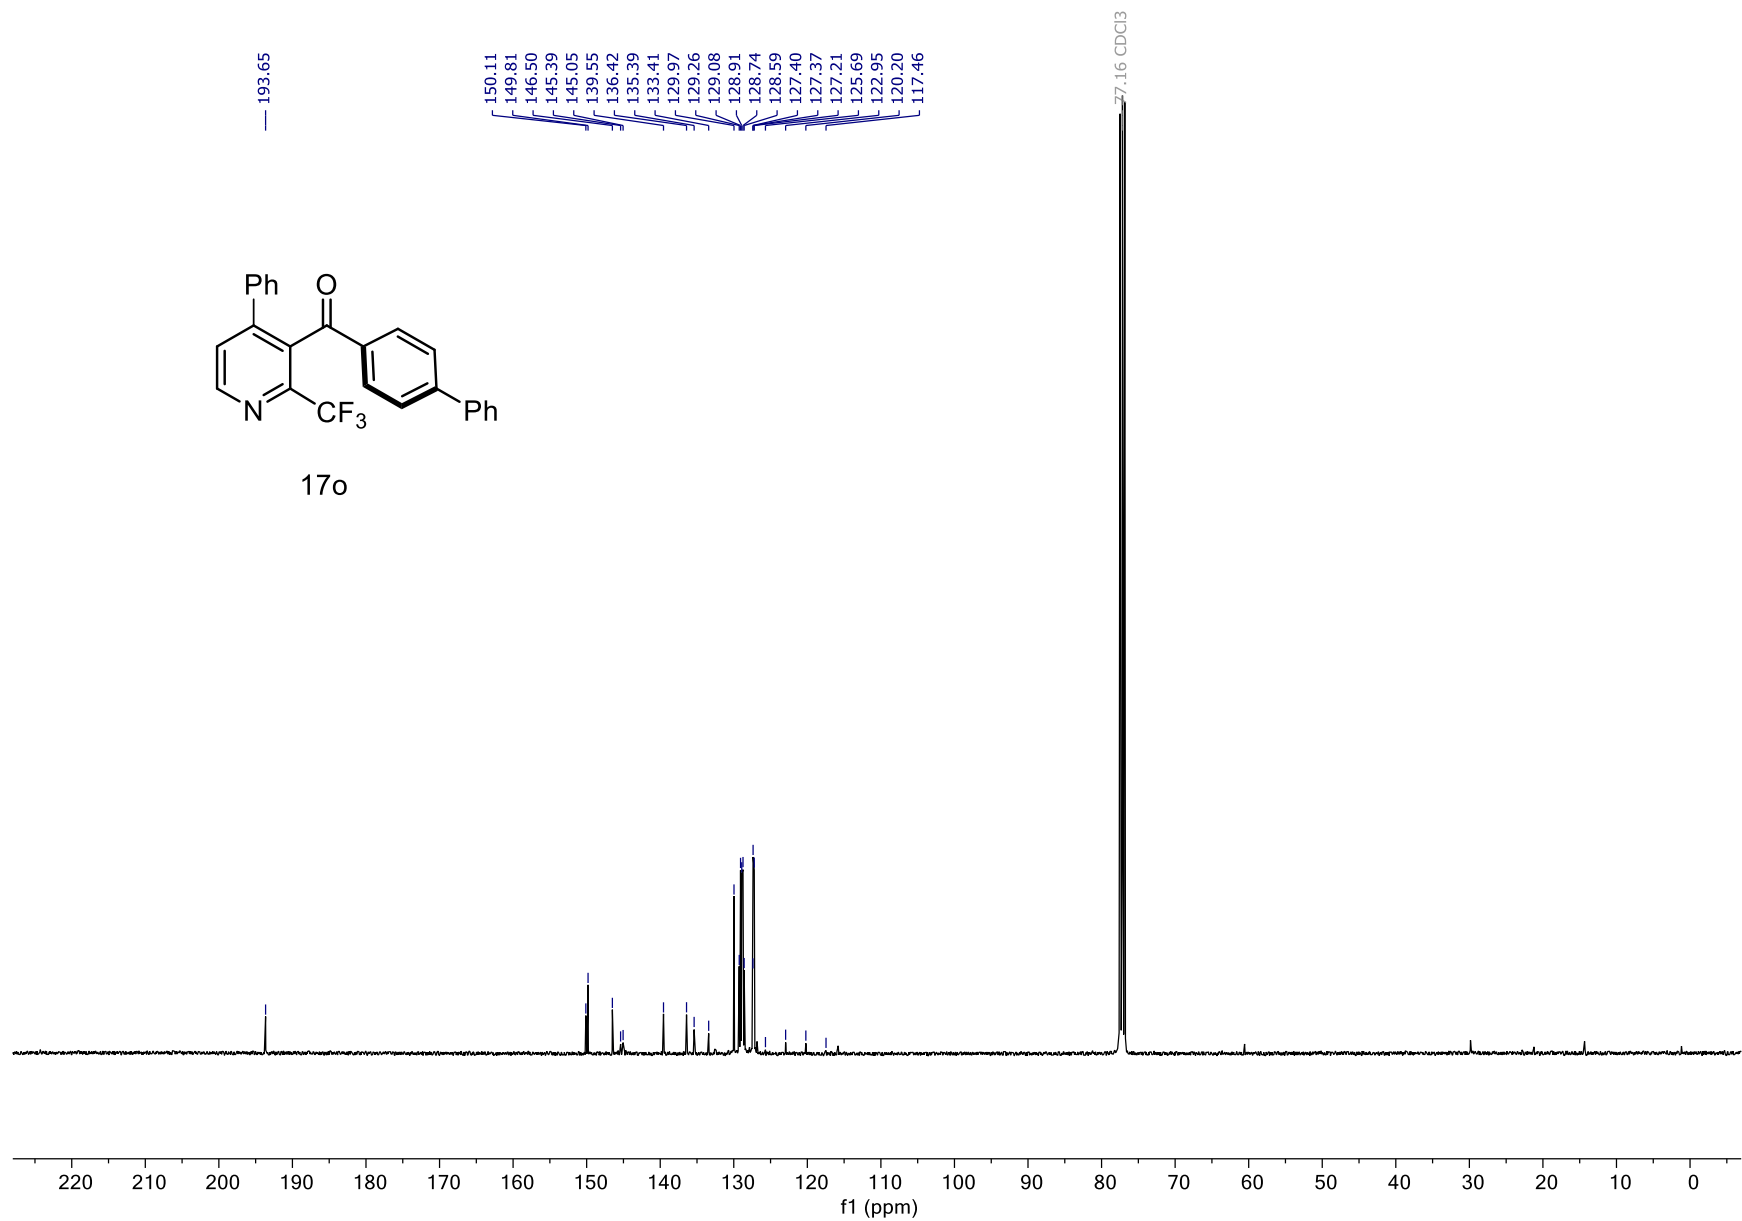

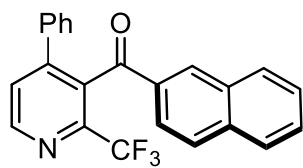

17p

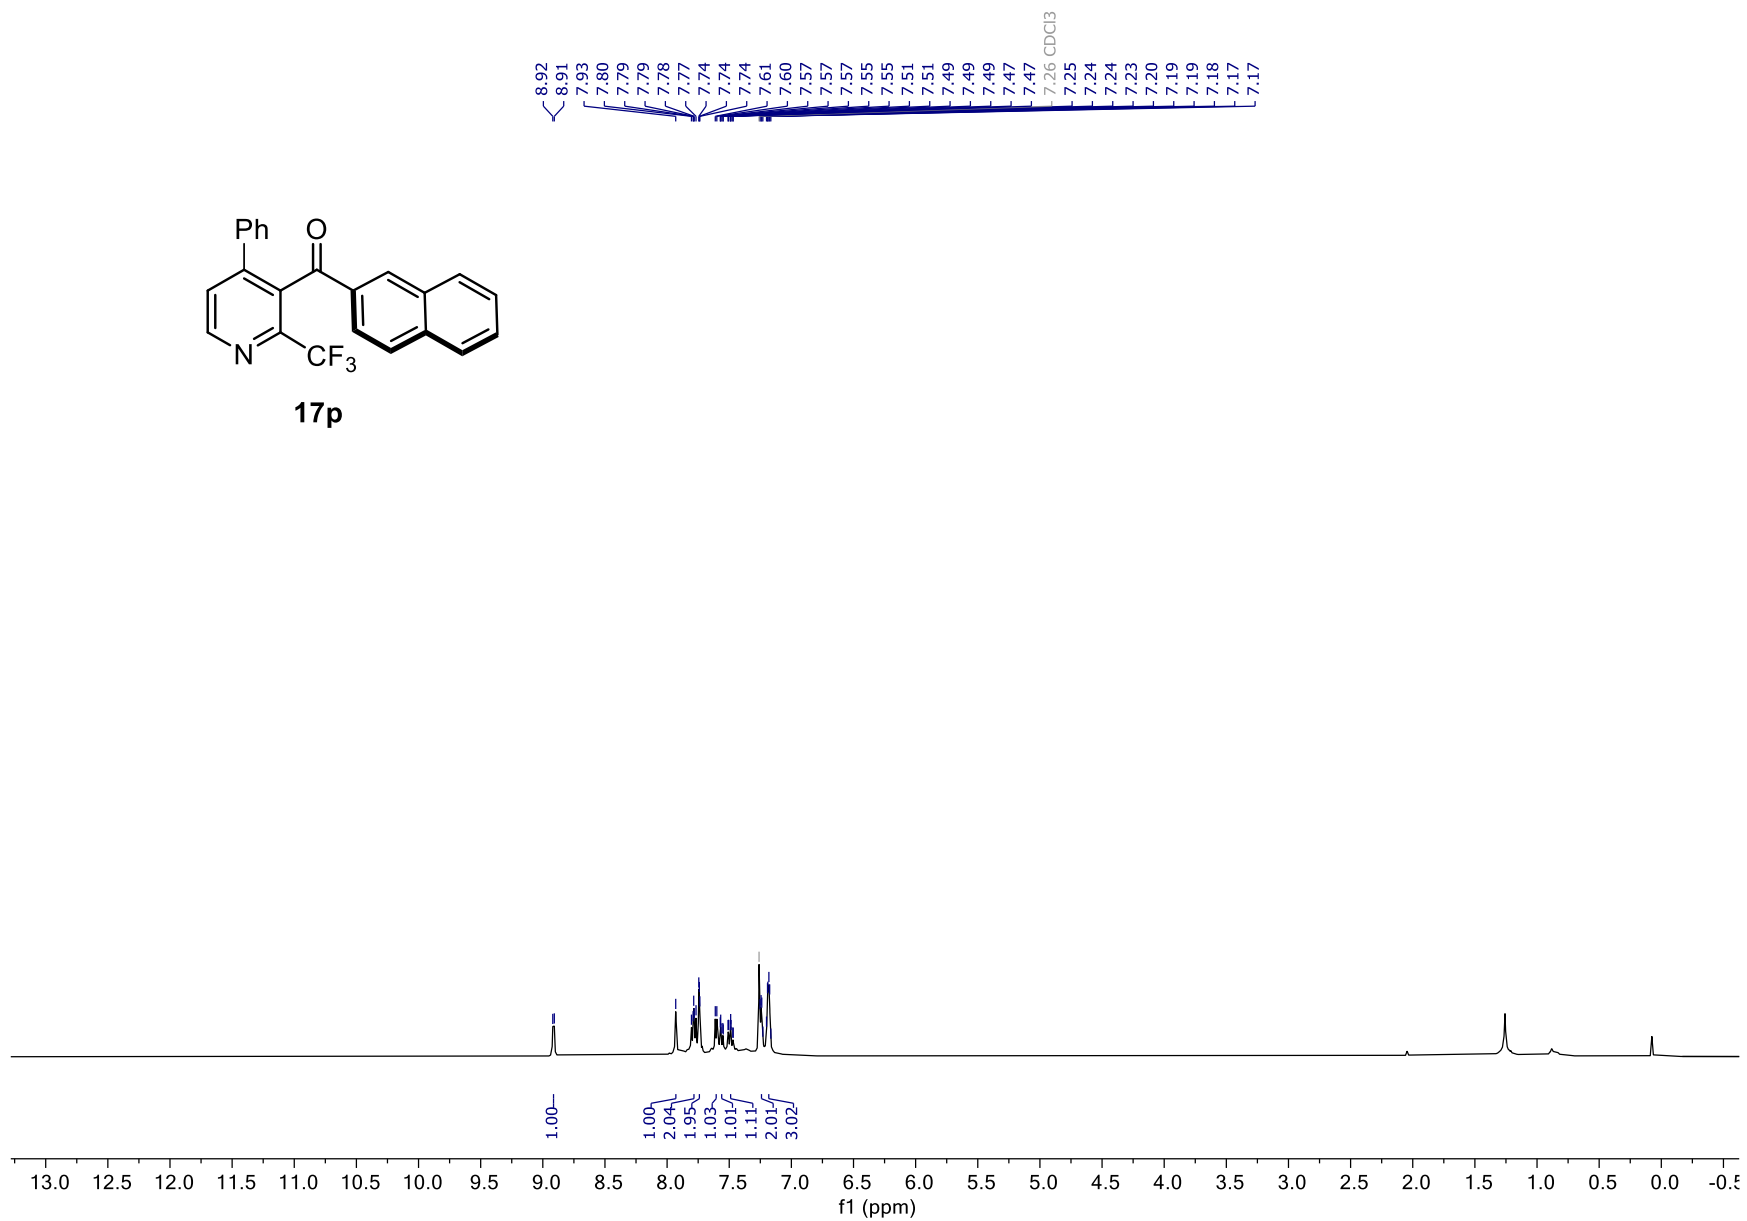

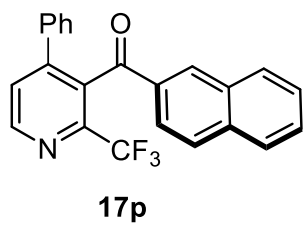

— 62.44

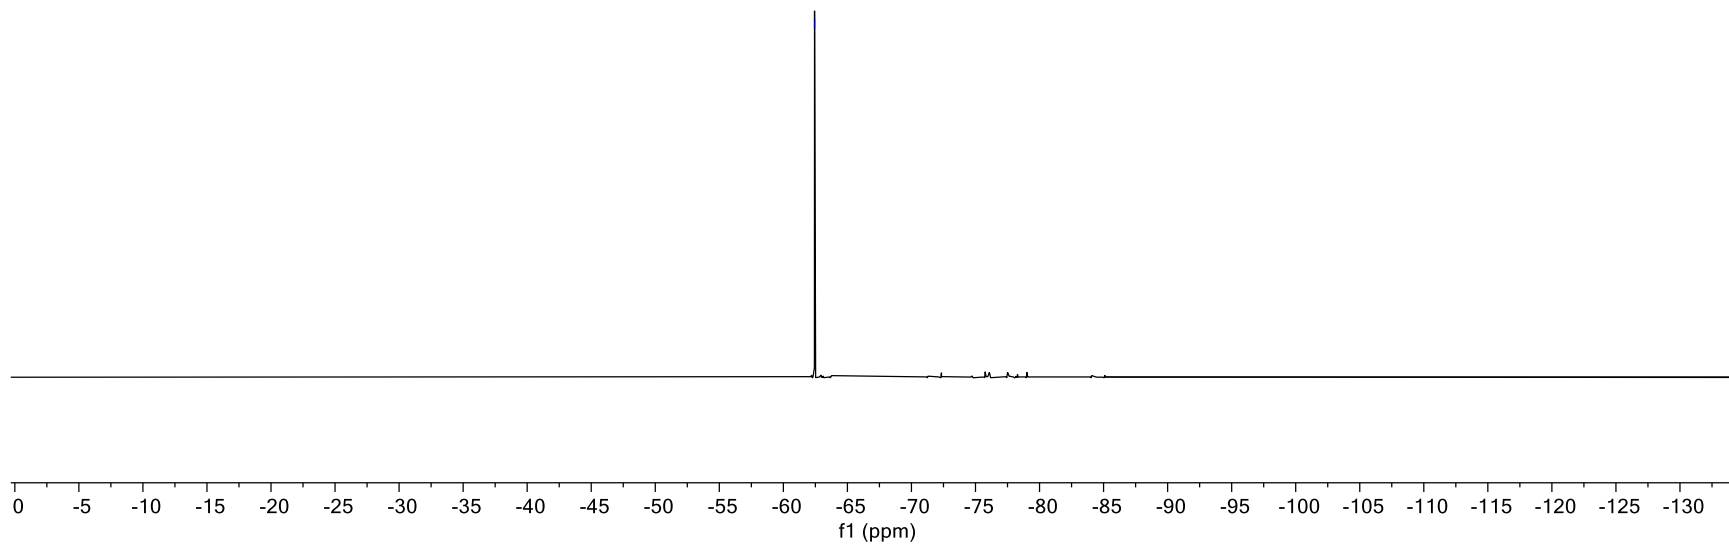

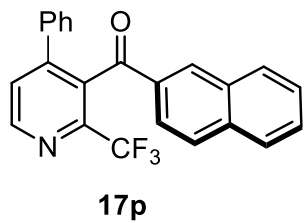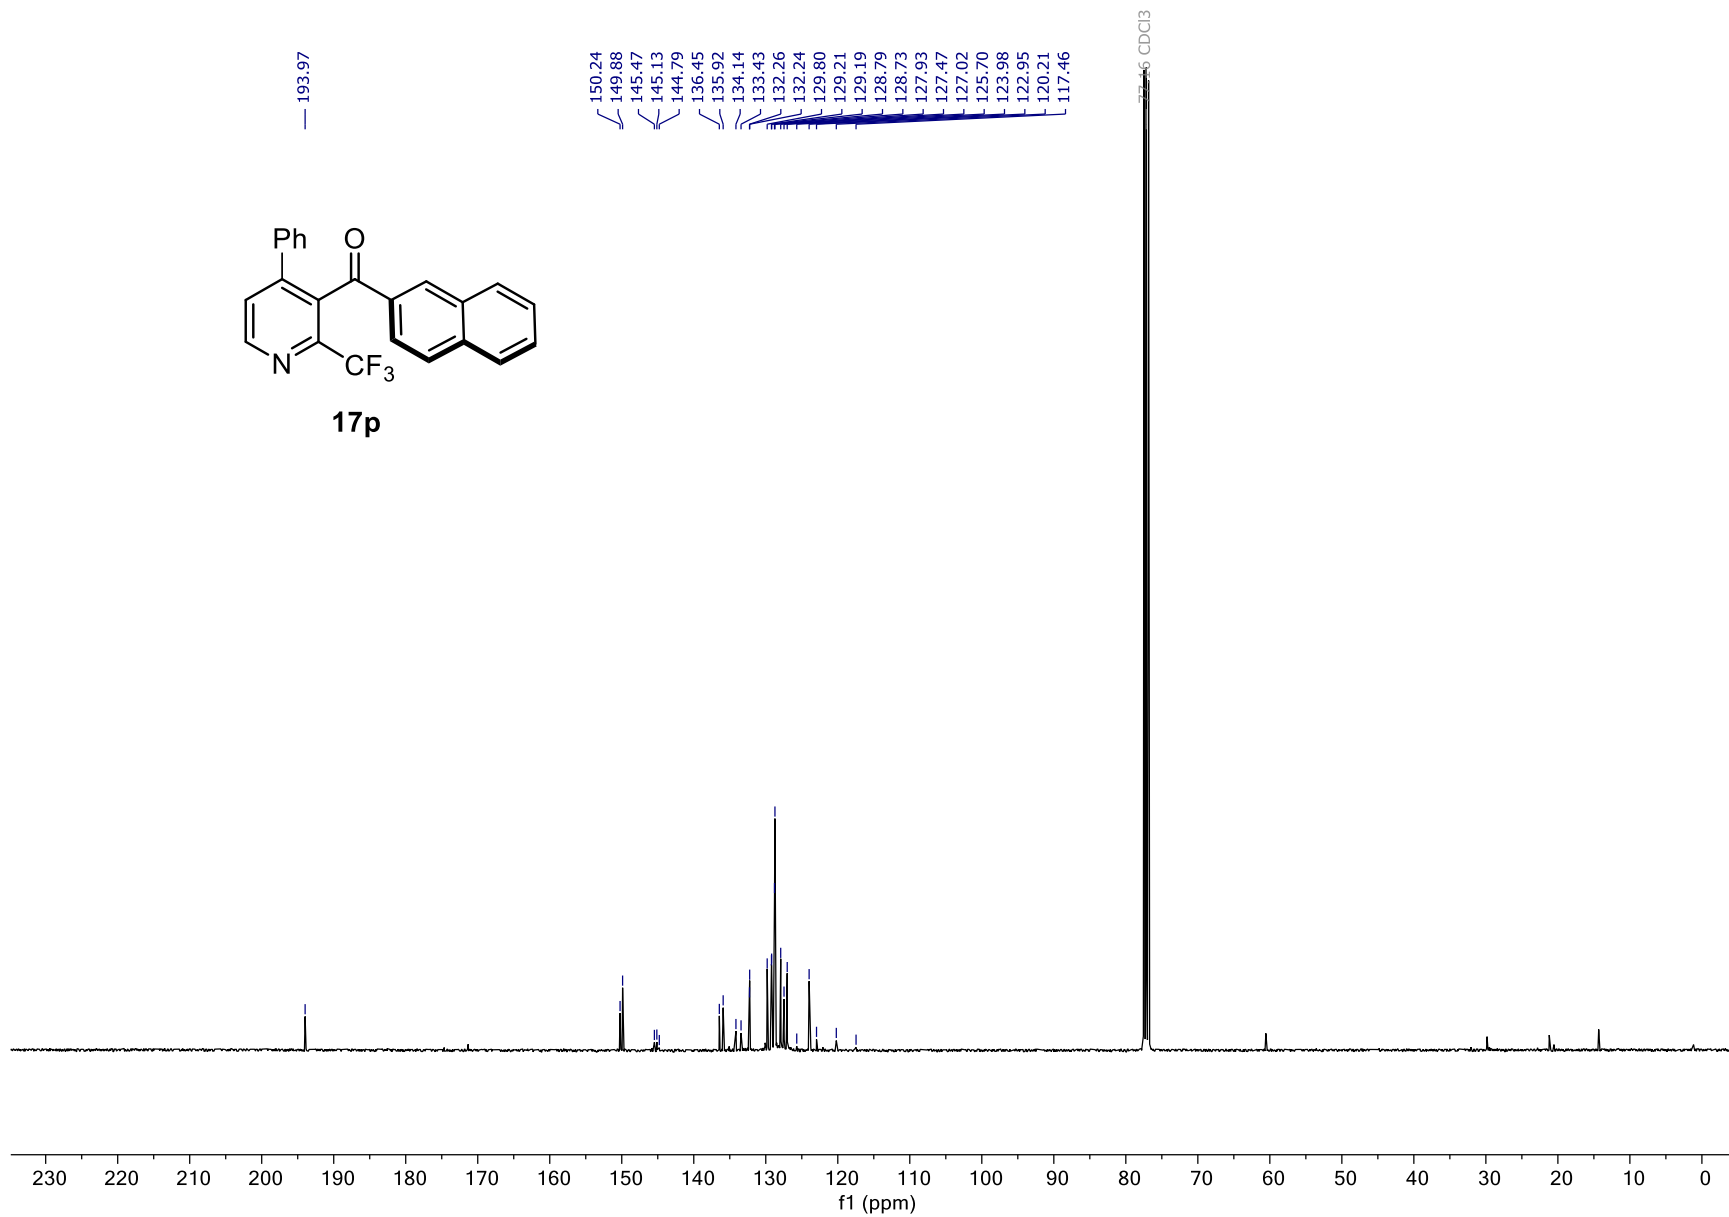

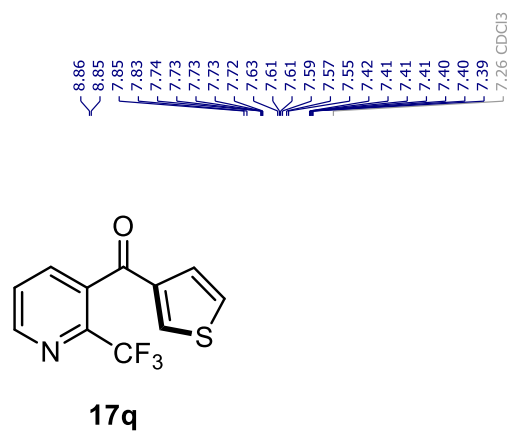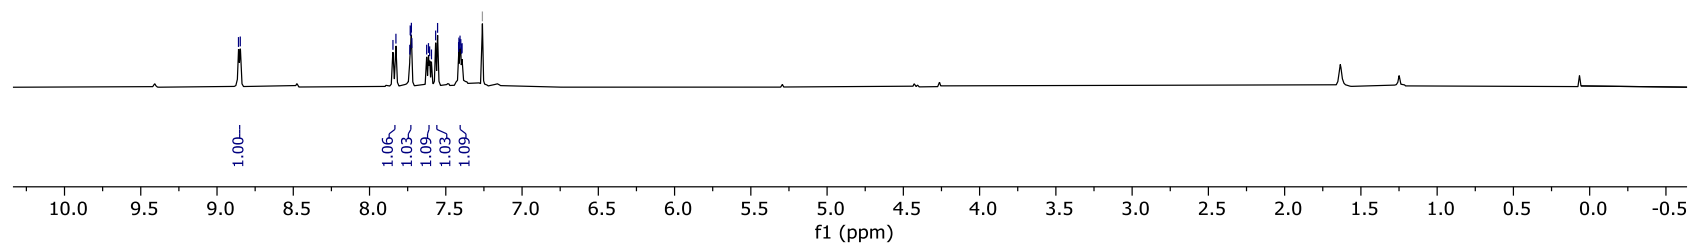

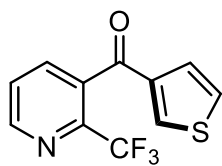

17q

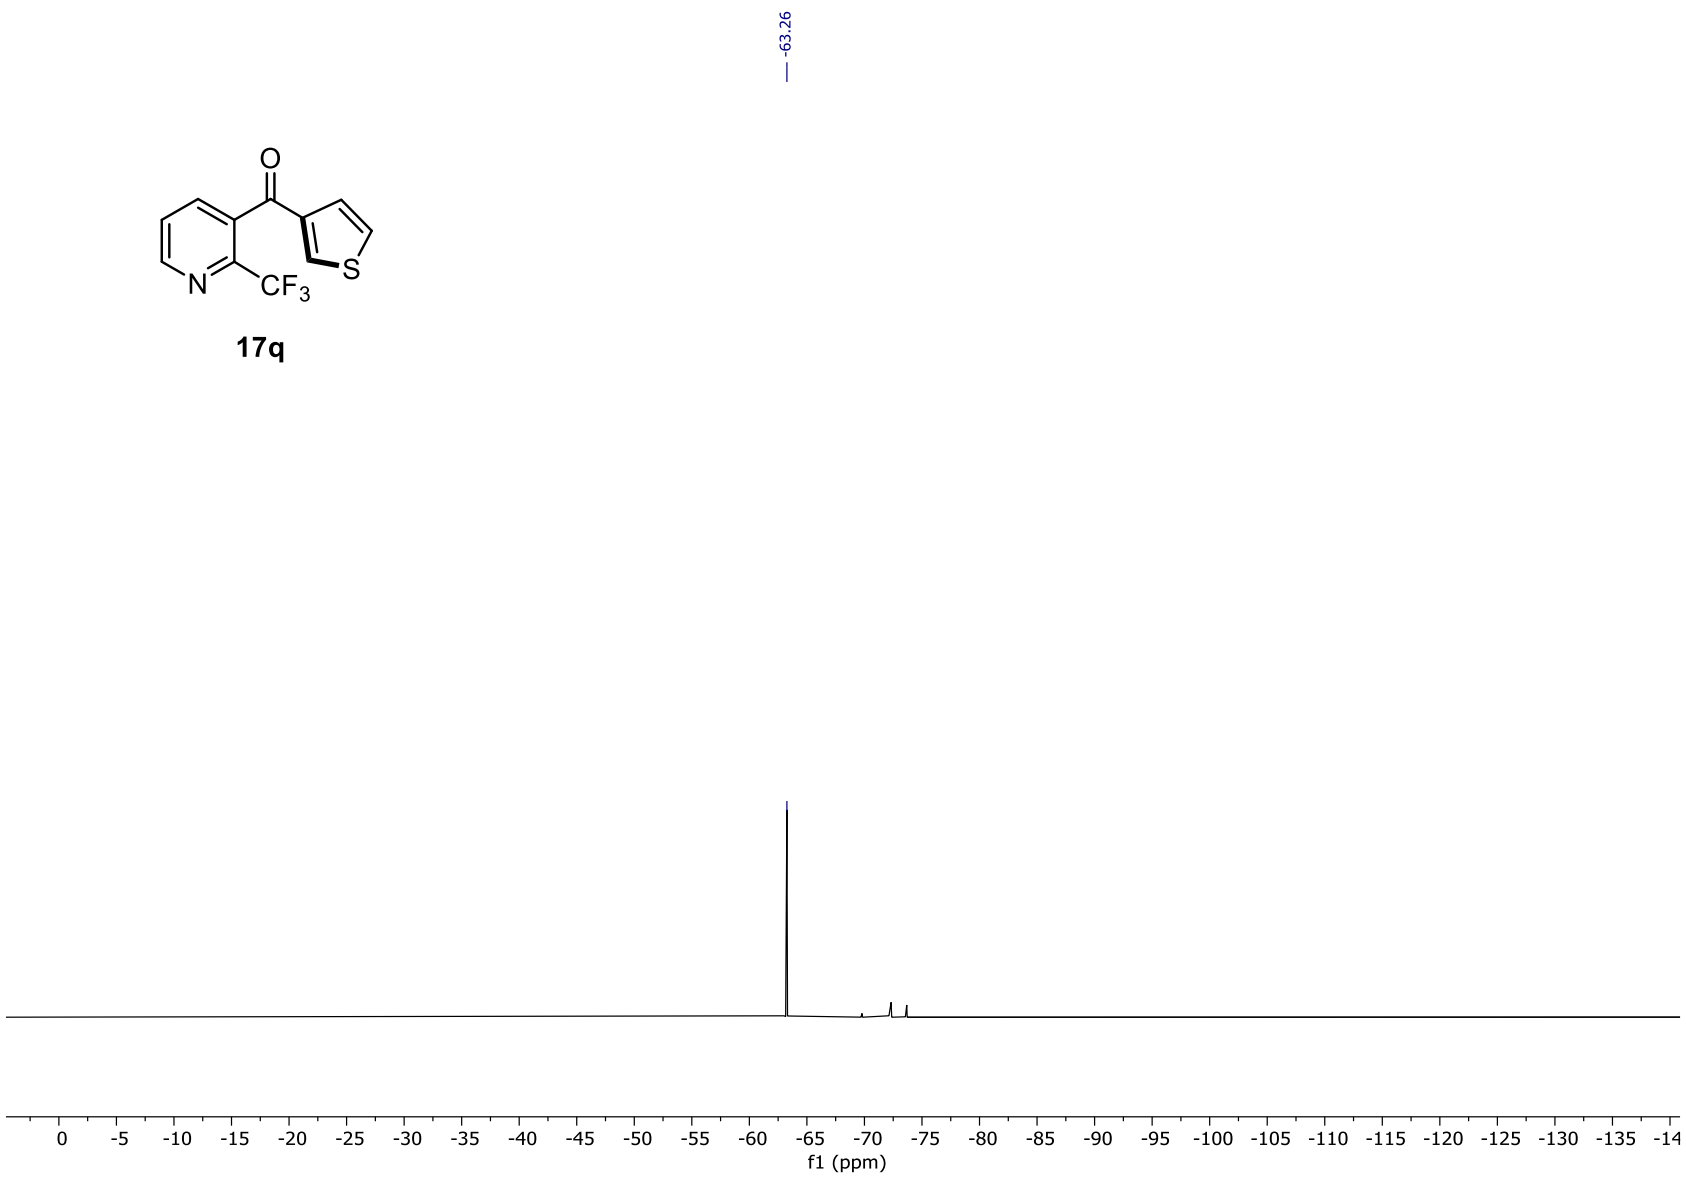

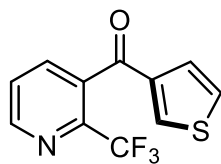

17q

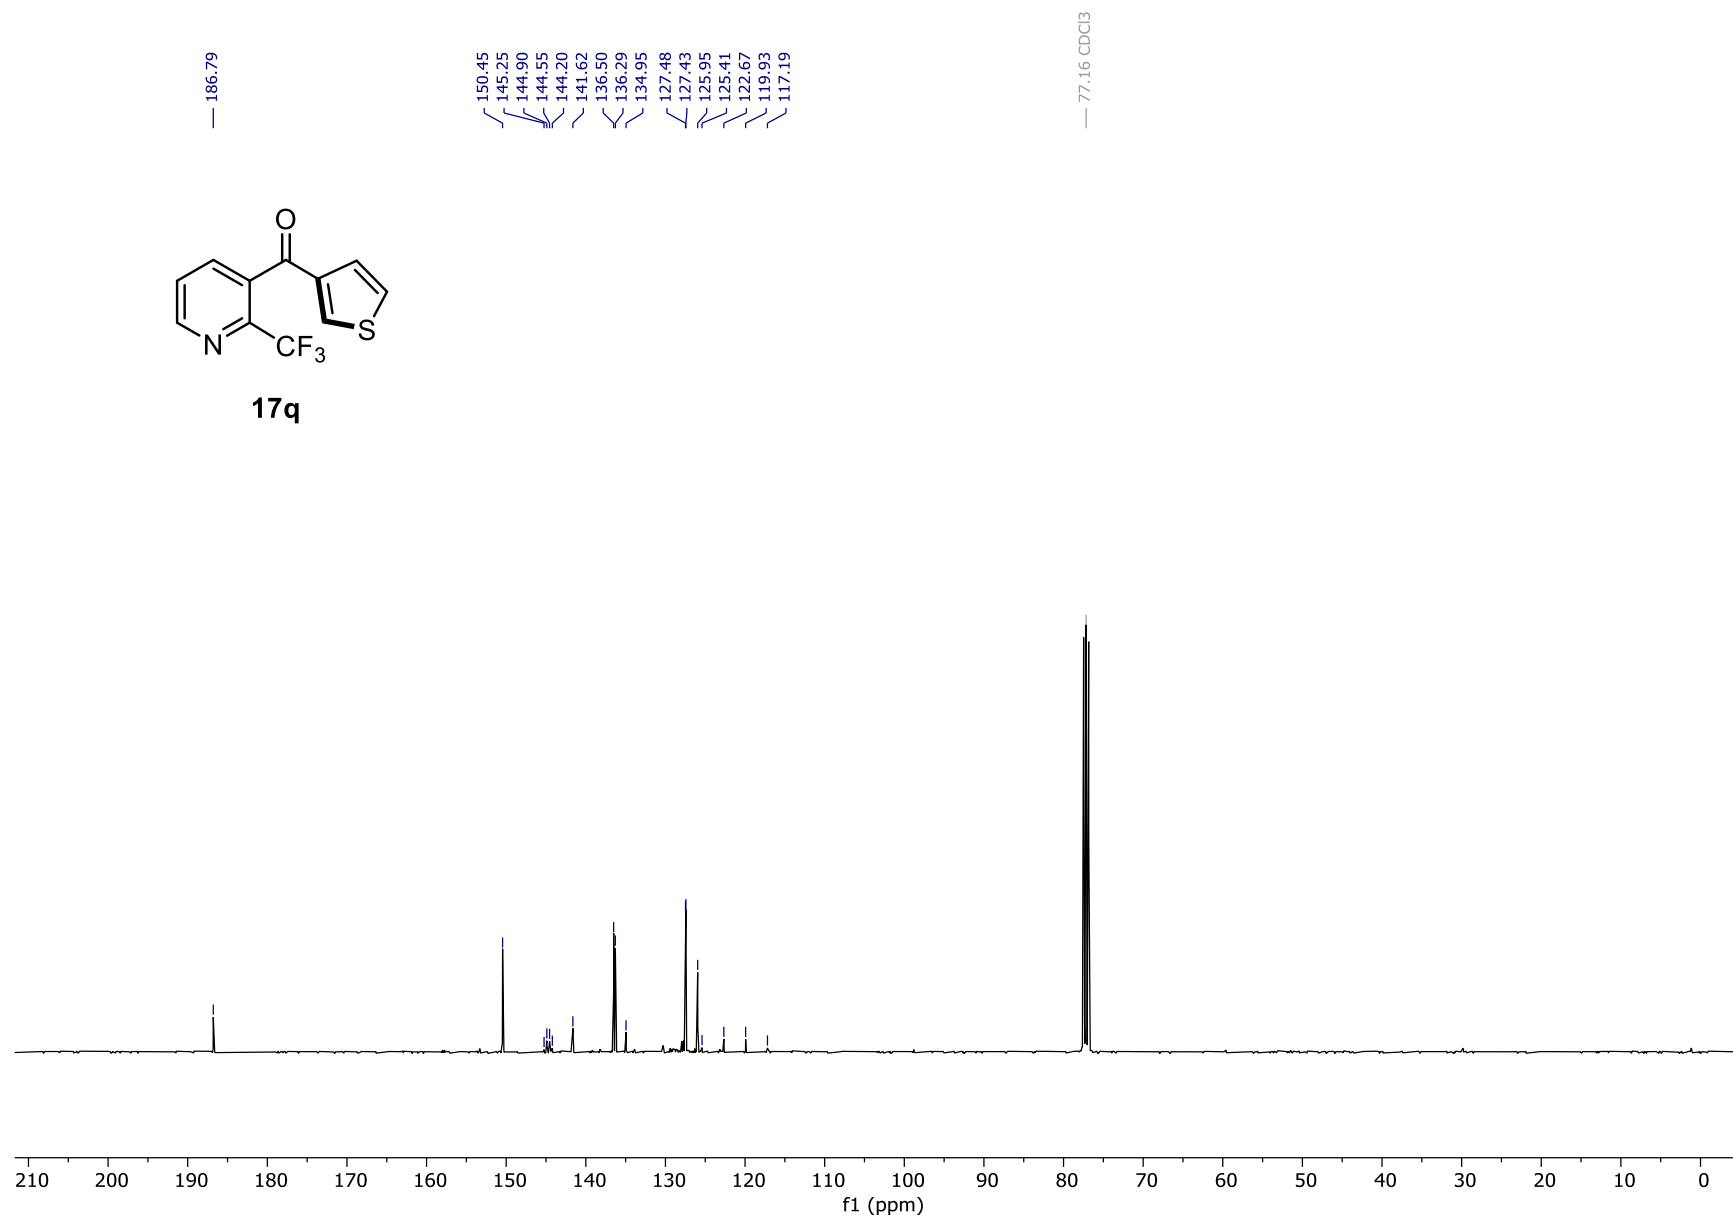

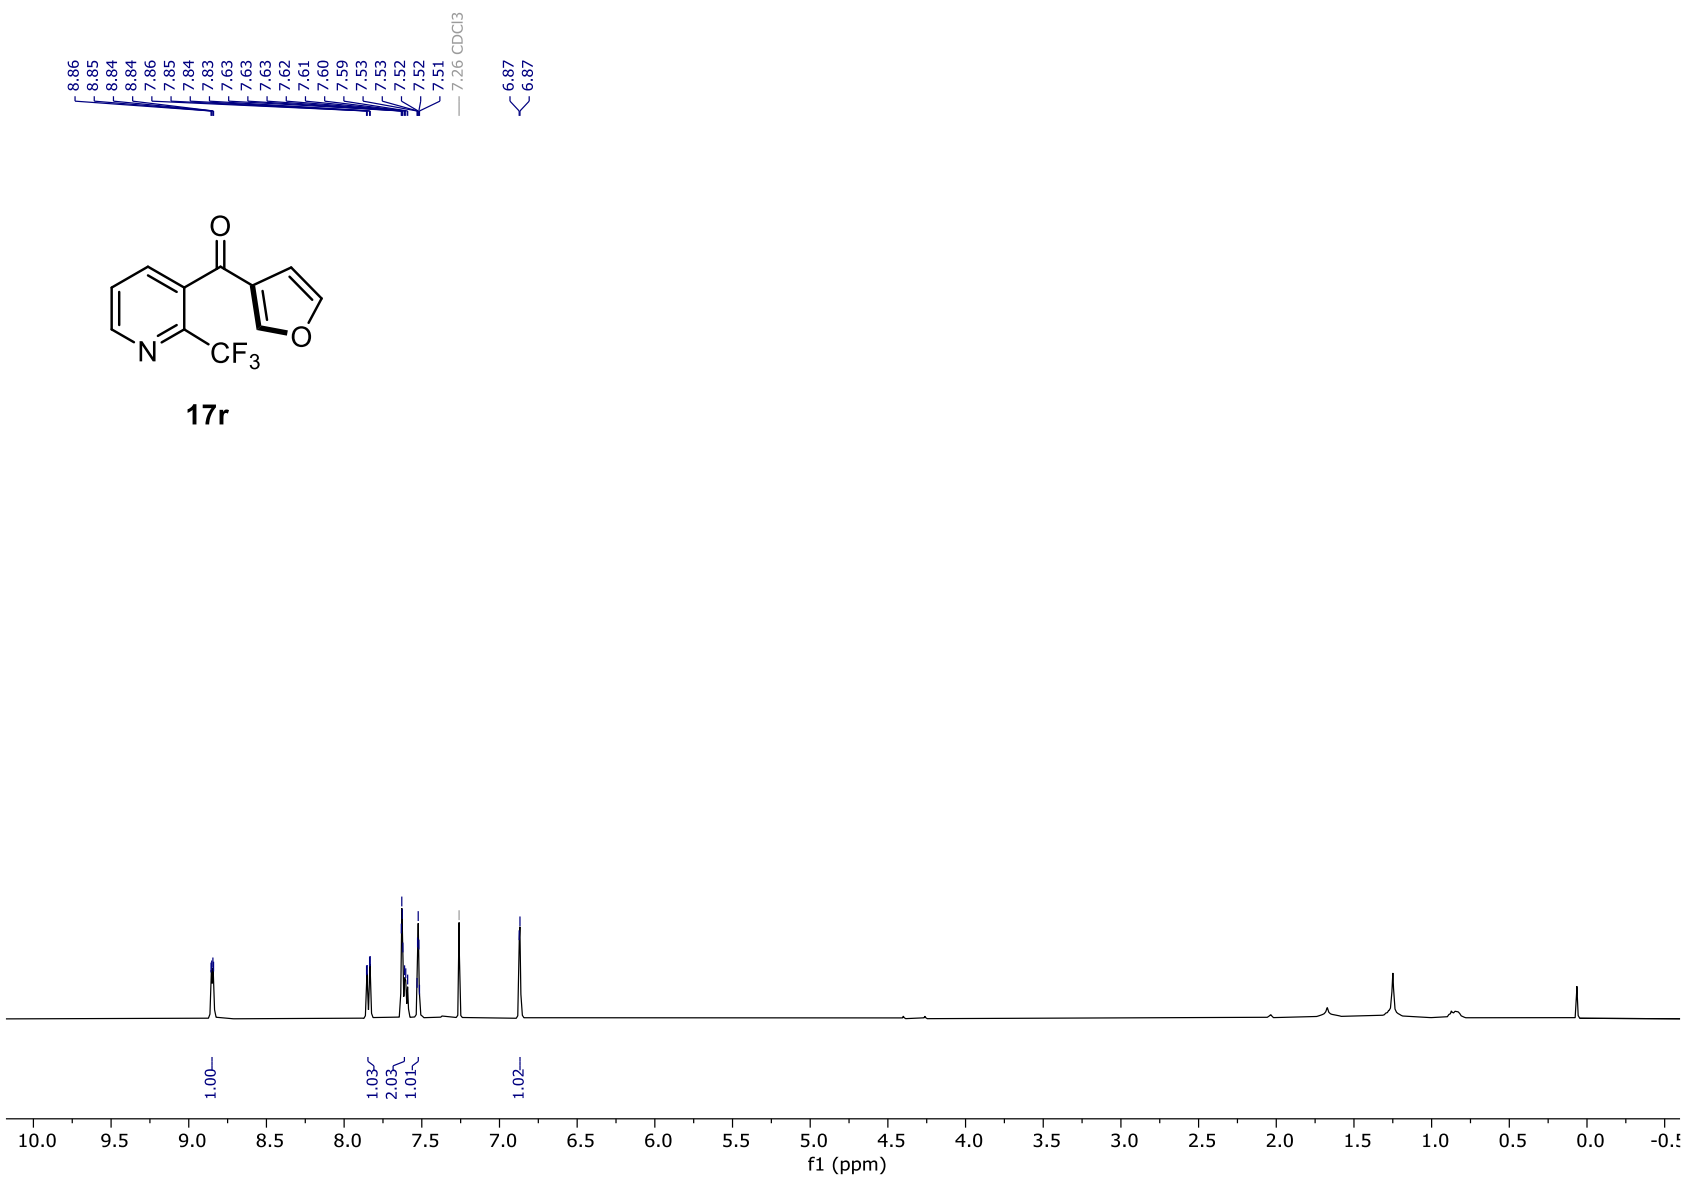

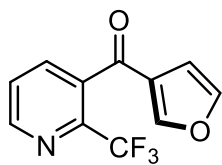

**17r**

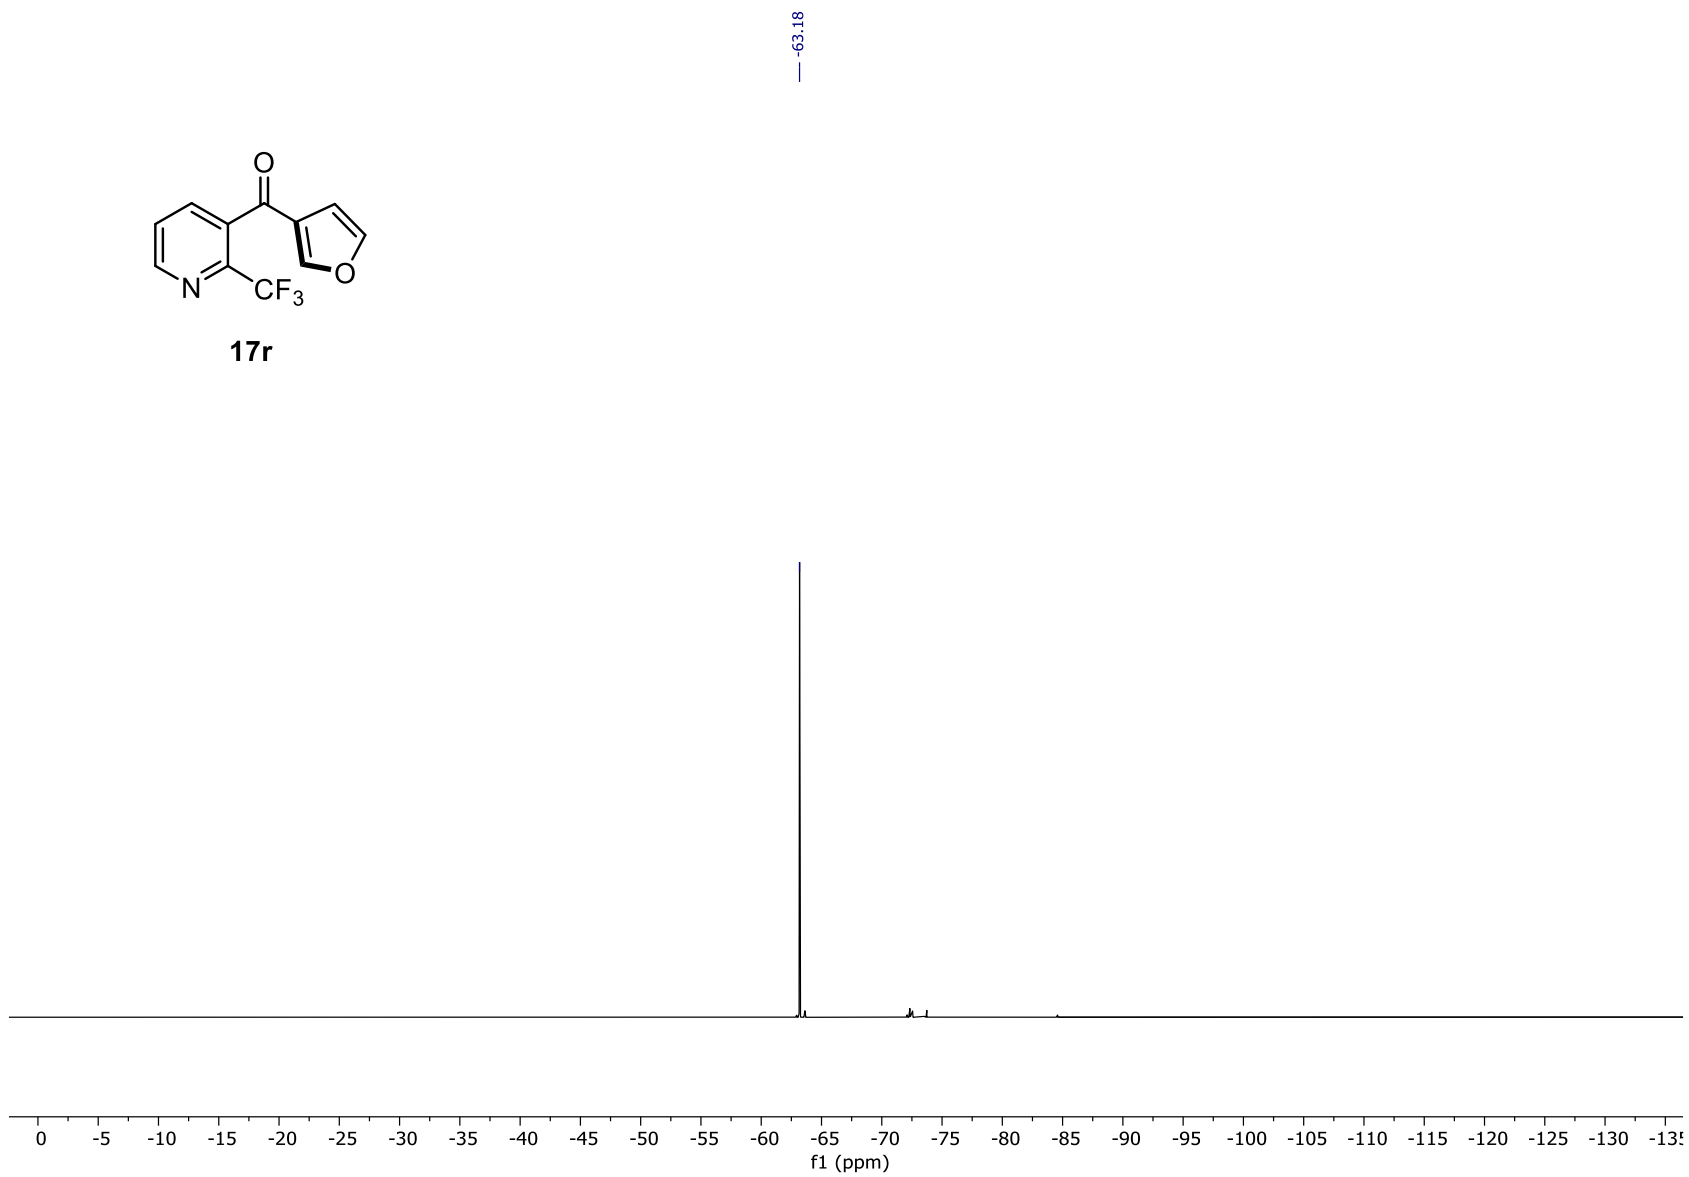

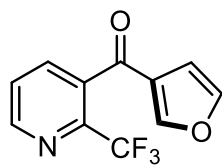

17r

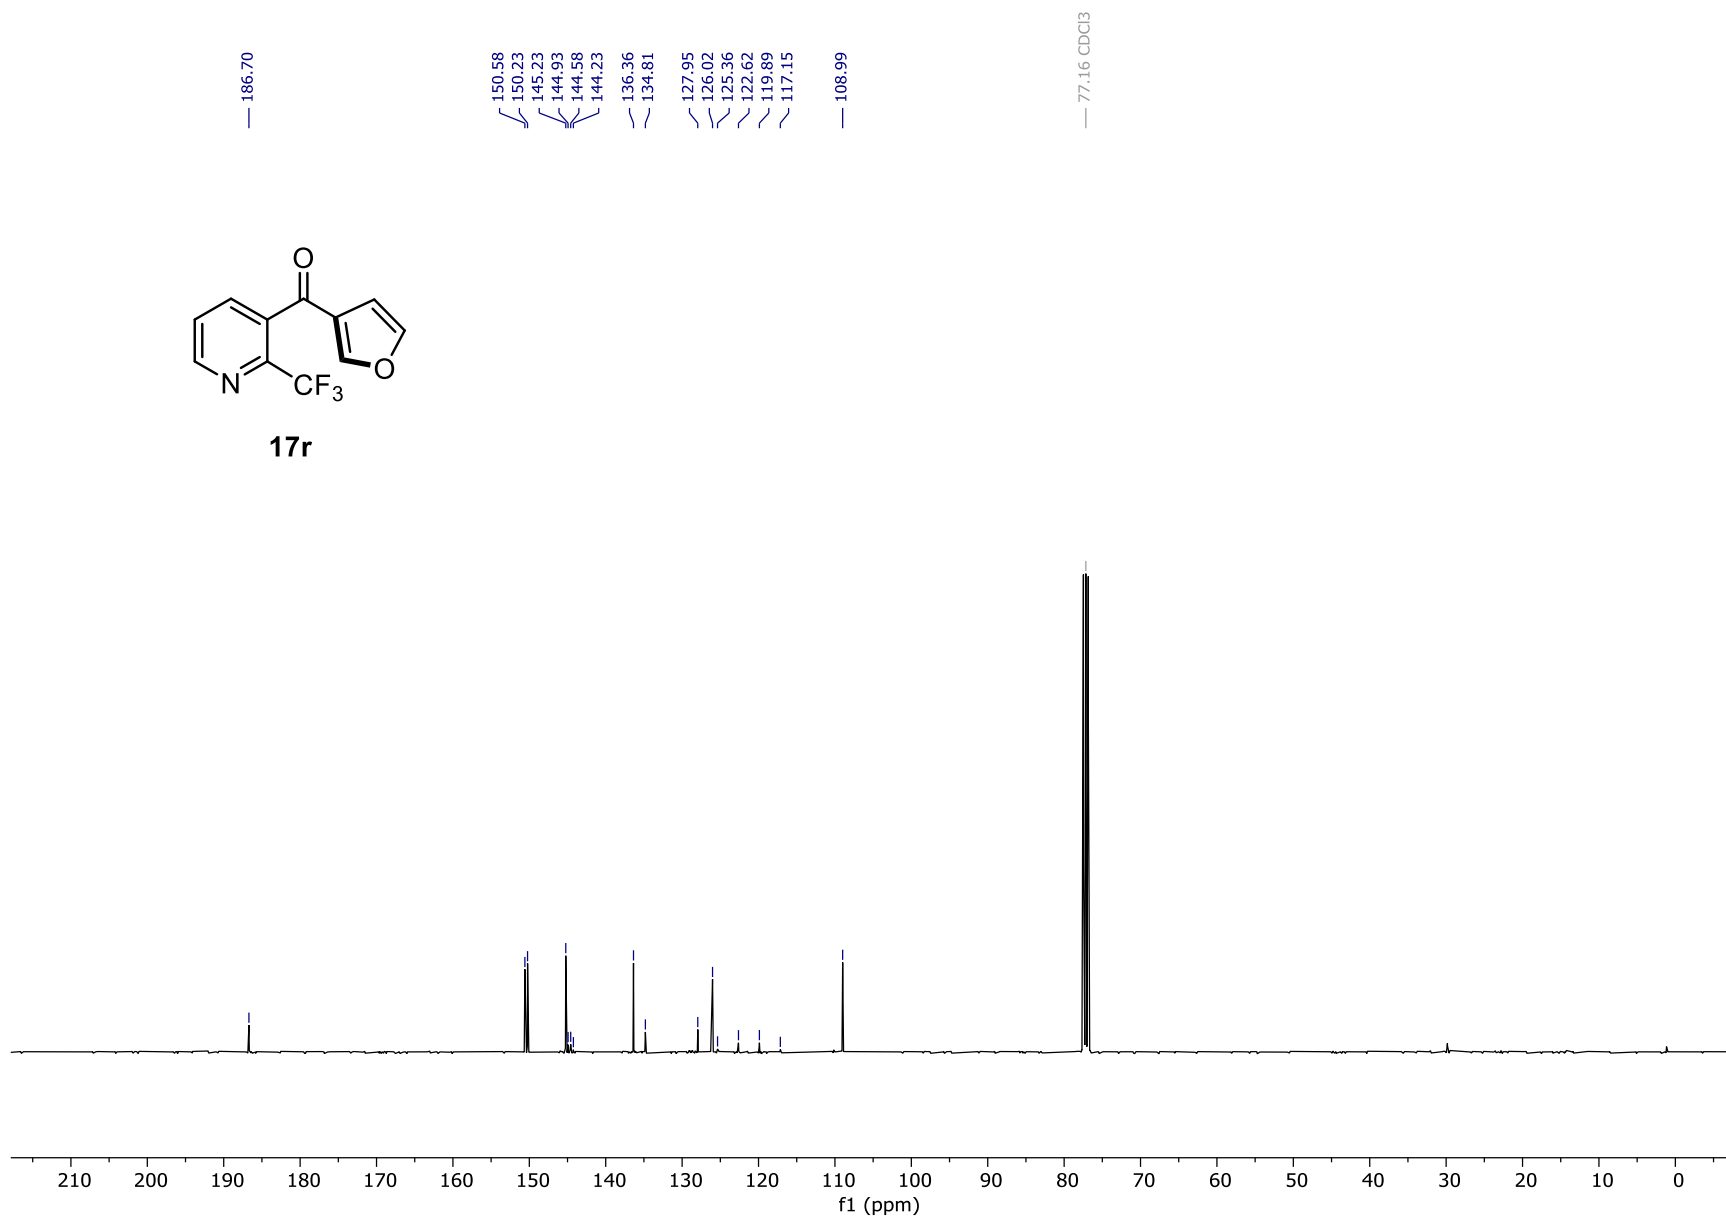

8.99  
8.98  
8.95  
8.95  
8.94  
8.94  
8.30  
8.30  
8.28  
8.28  
7.86  
7.86  
7.85  
7.84  
7.83  
7.83  
7.82  
7.82  
7.70  
7.70  
7.69  
7.68  
7.26 CDCl<sub>3</sub>

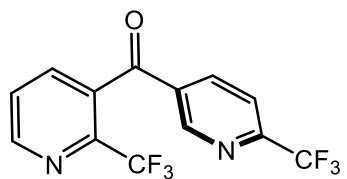

**17s**

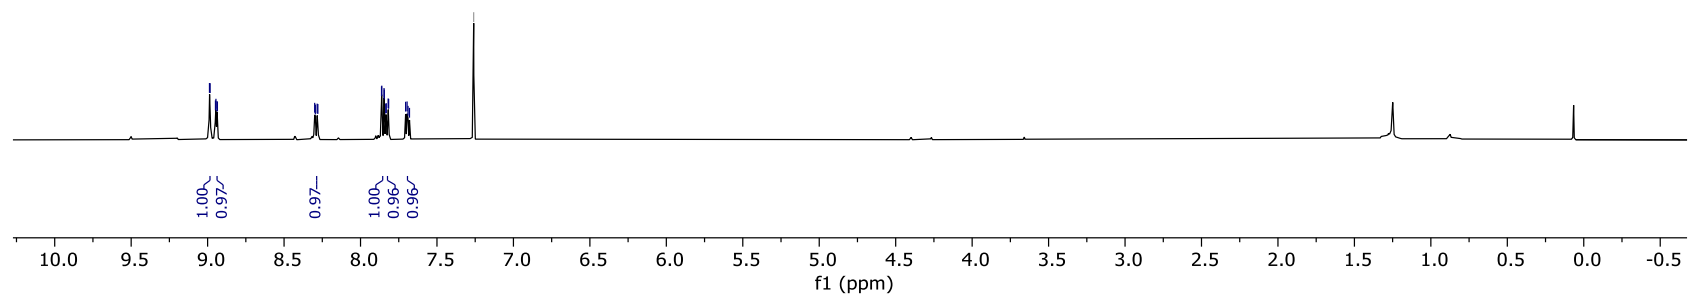

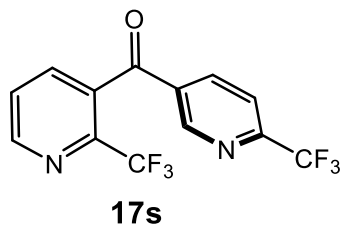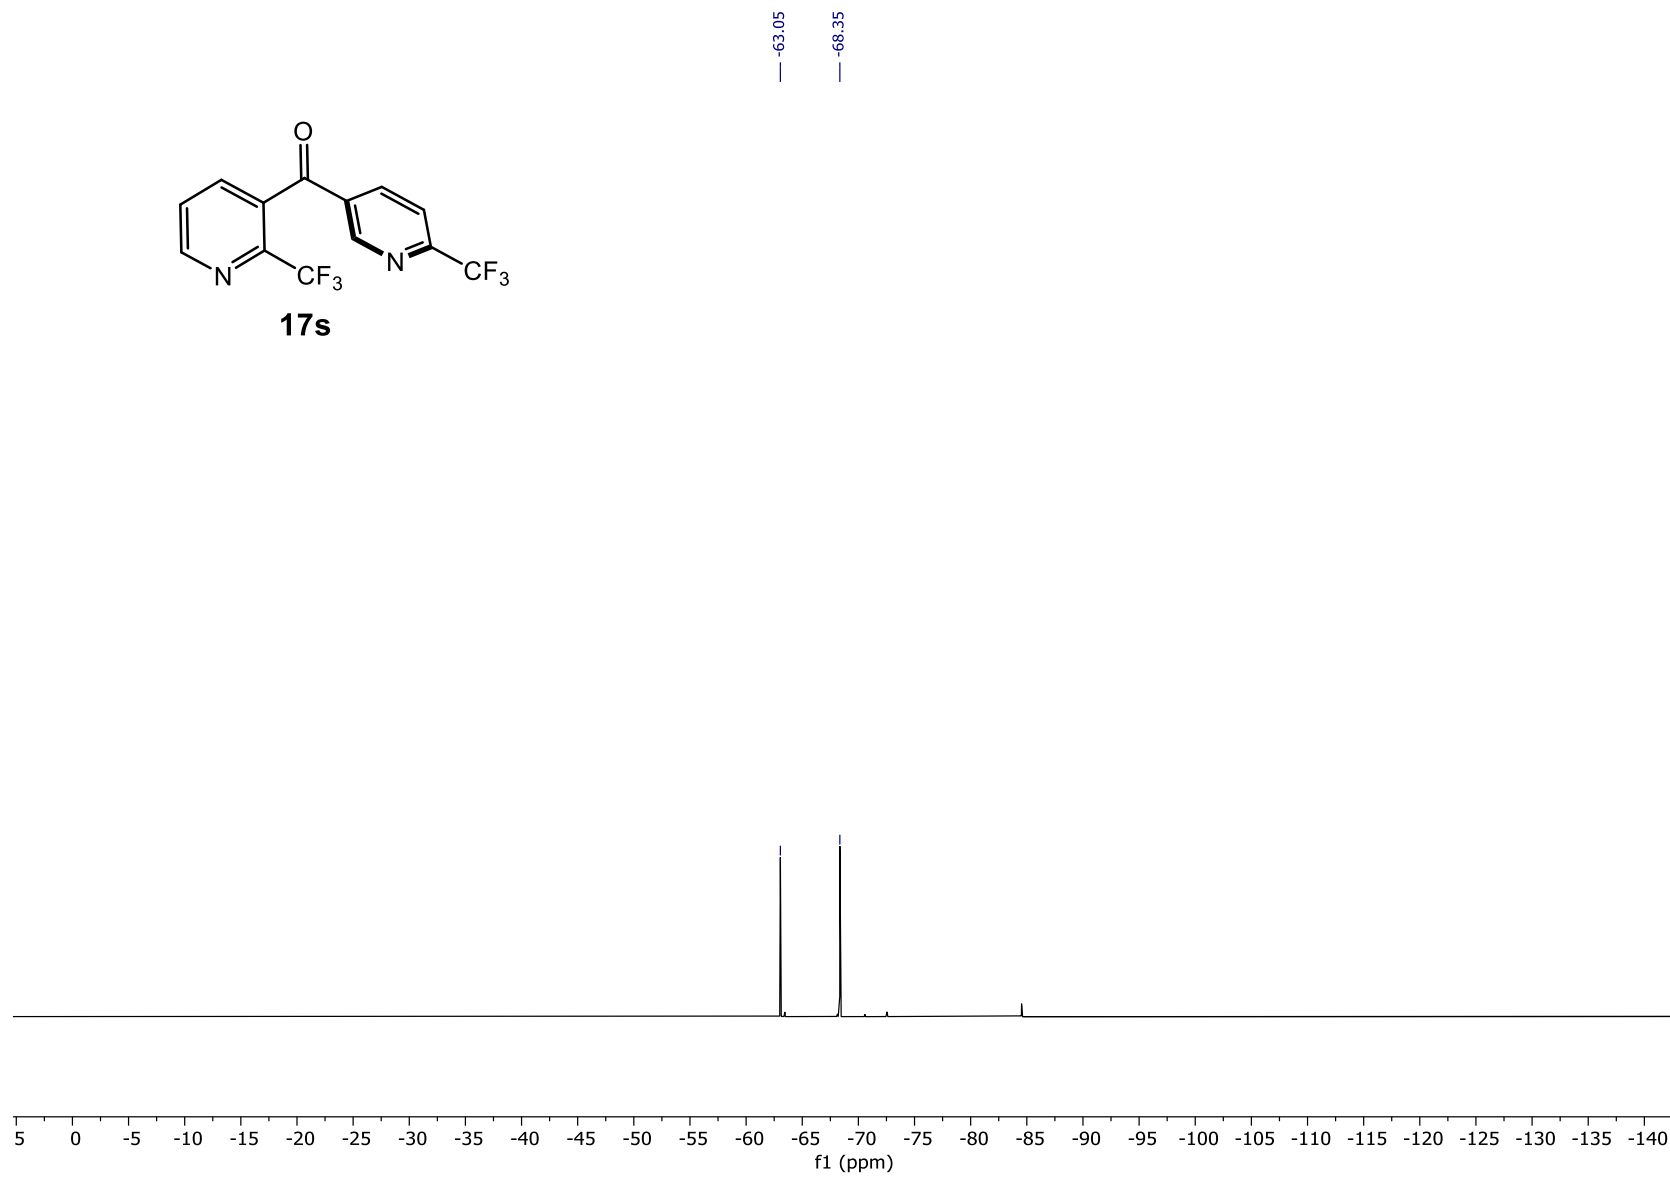

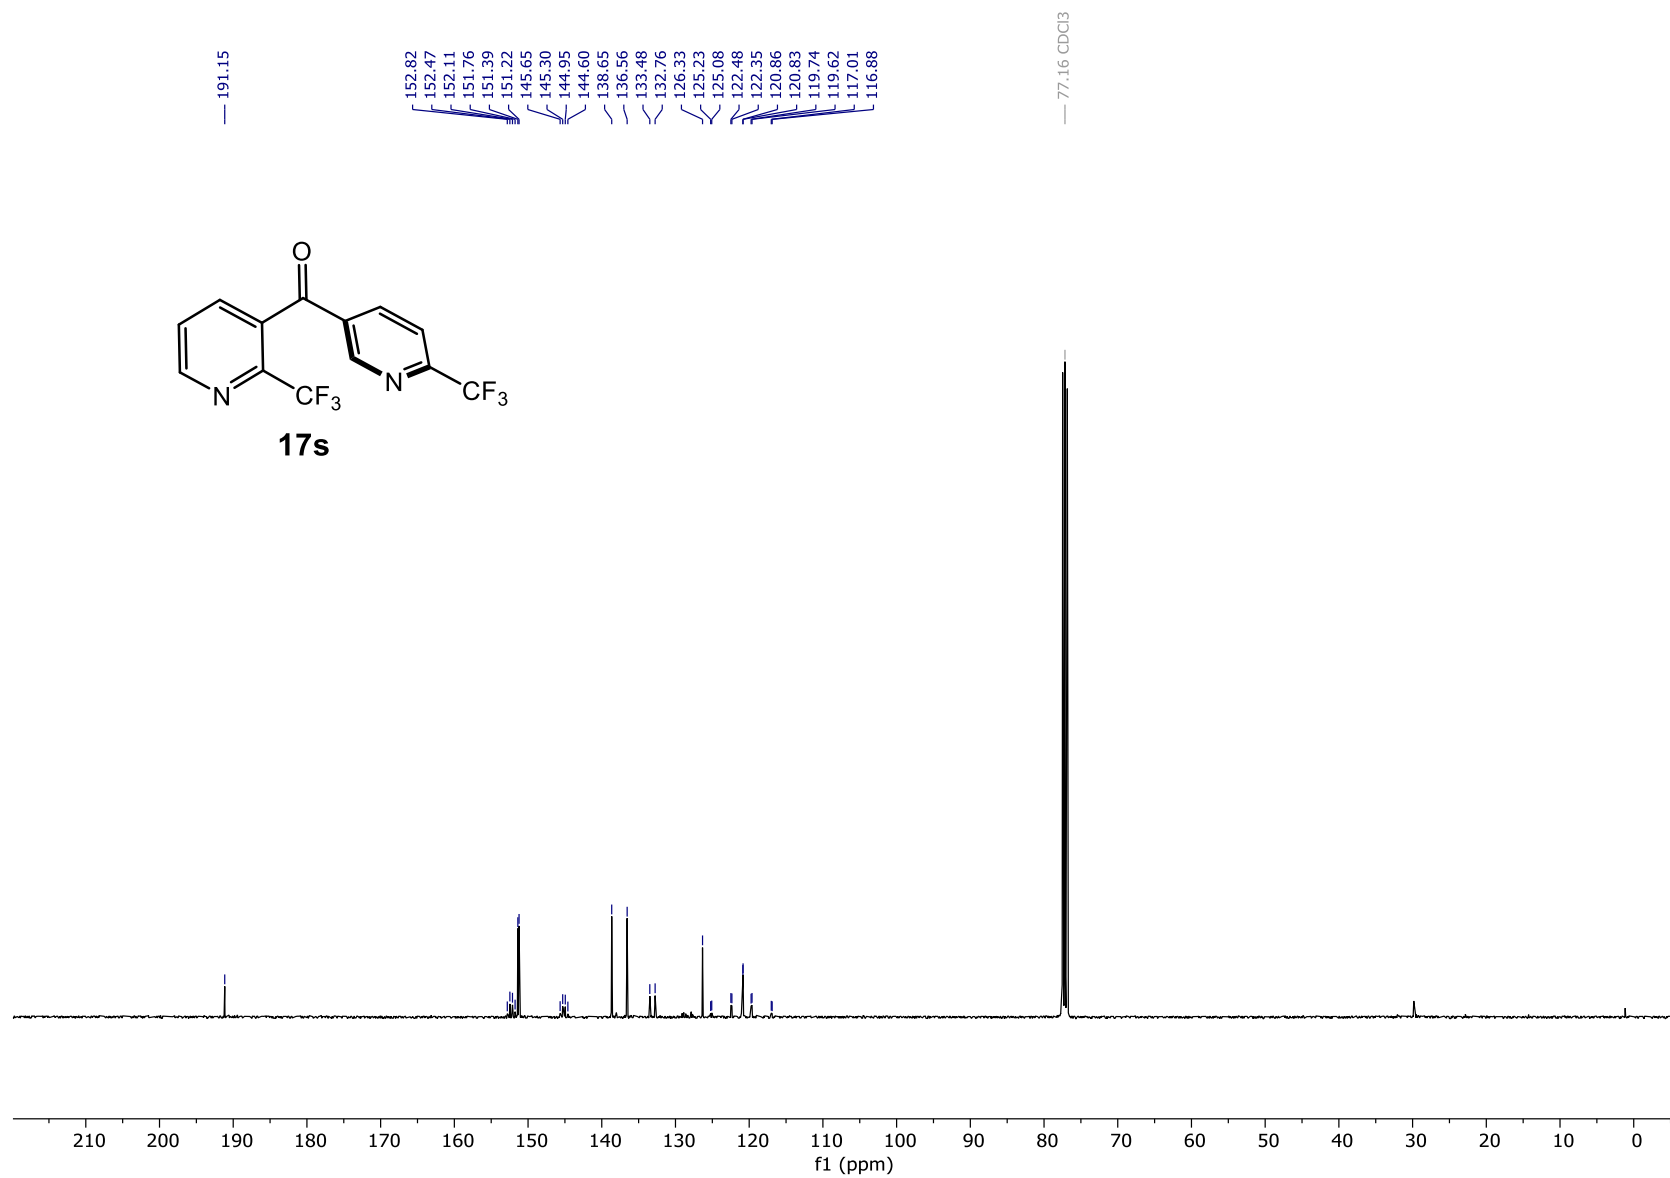

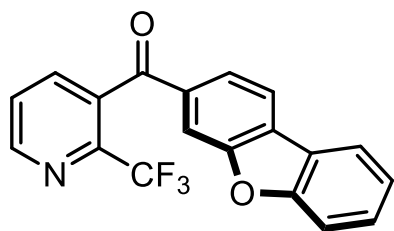

17t

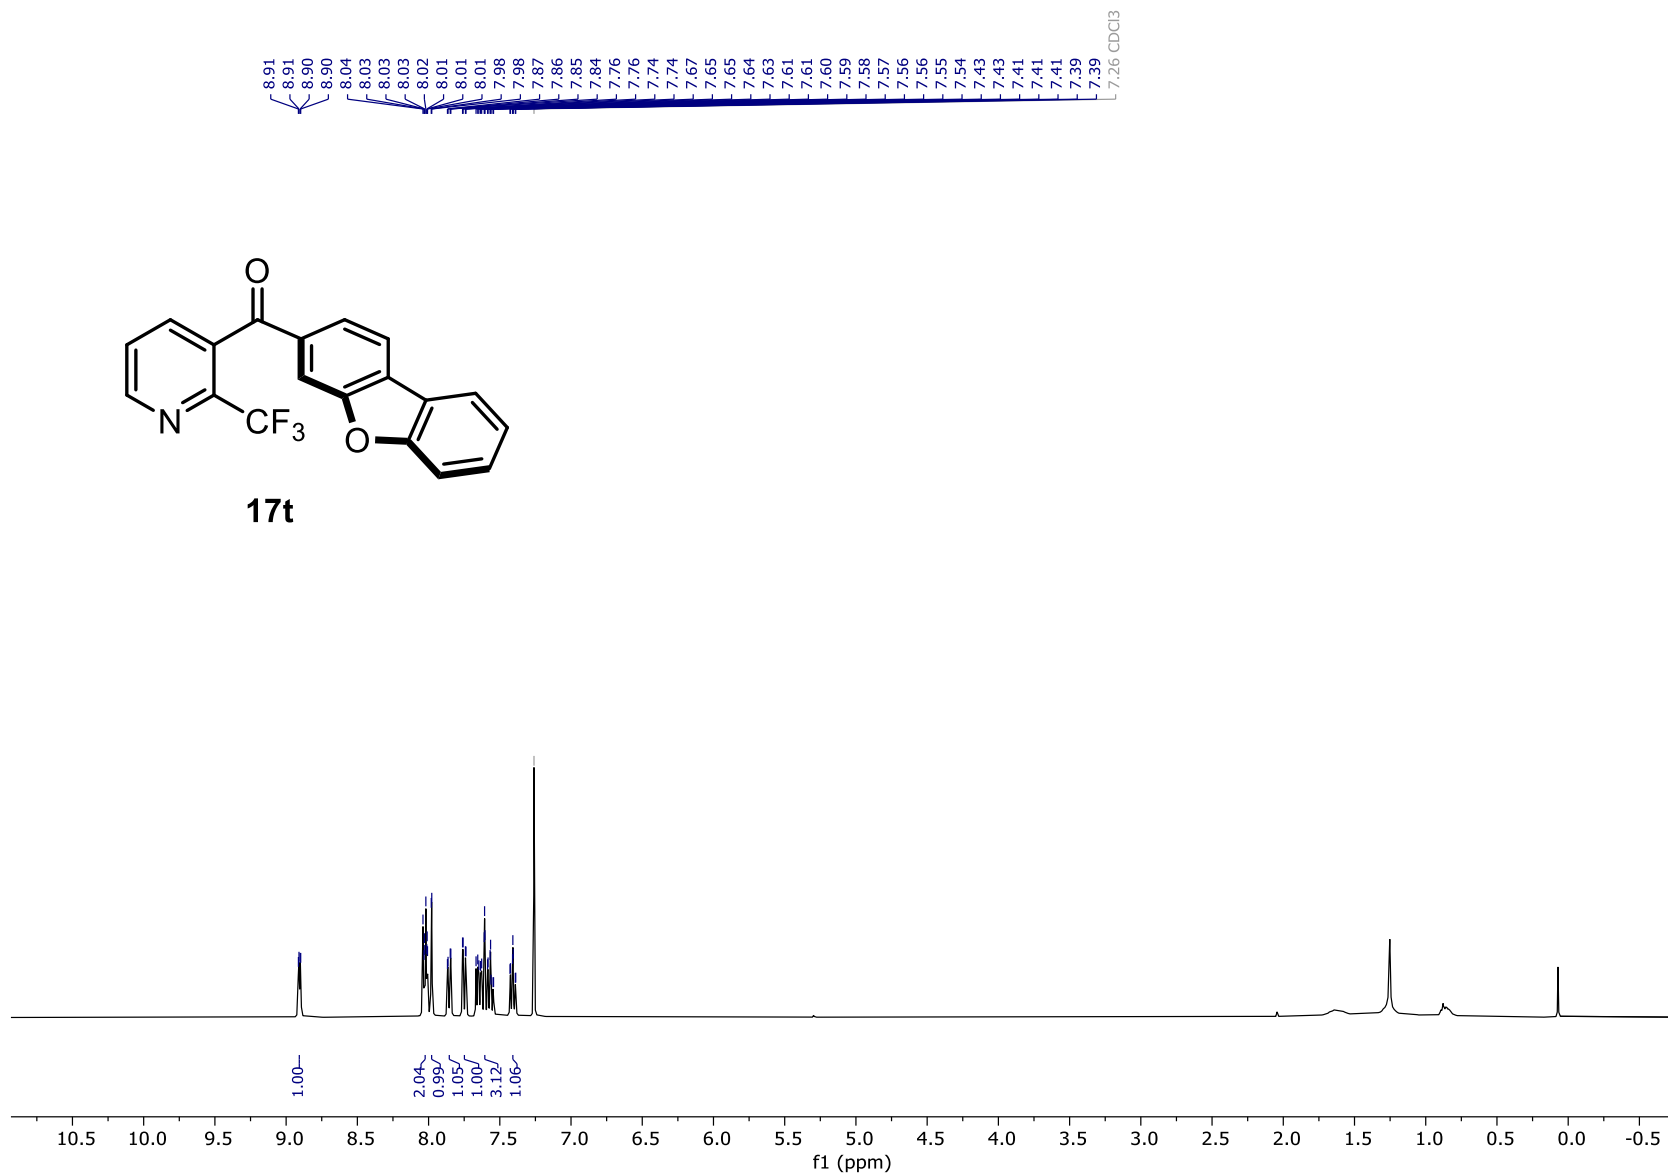

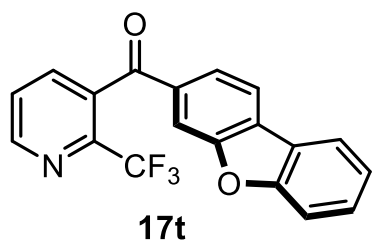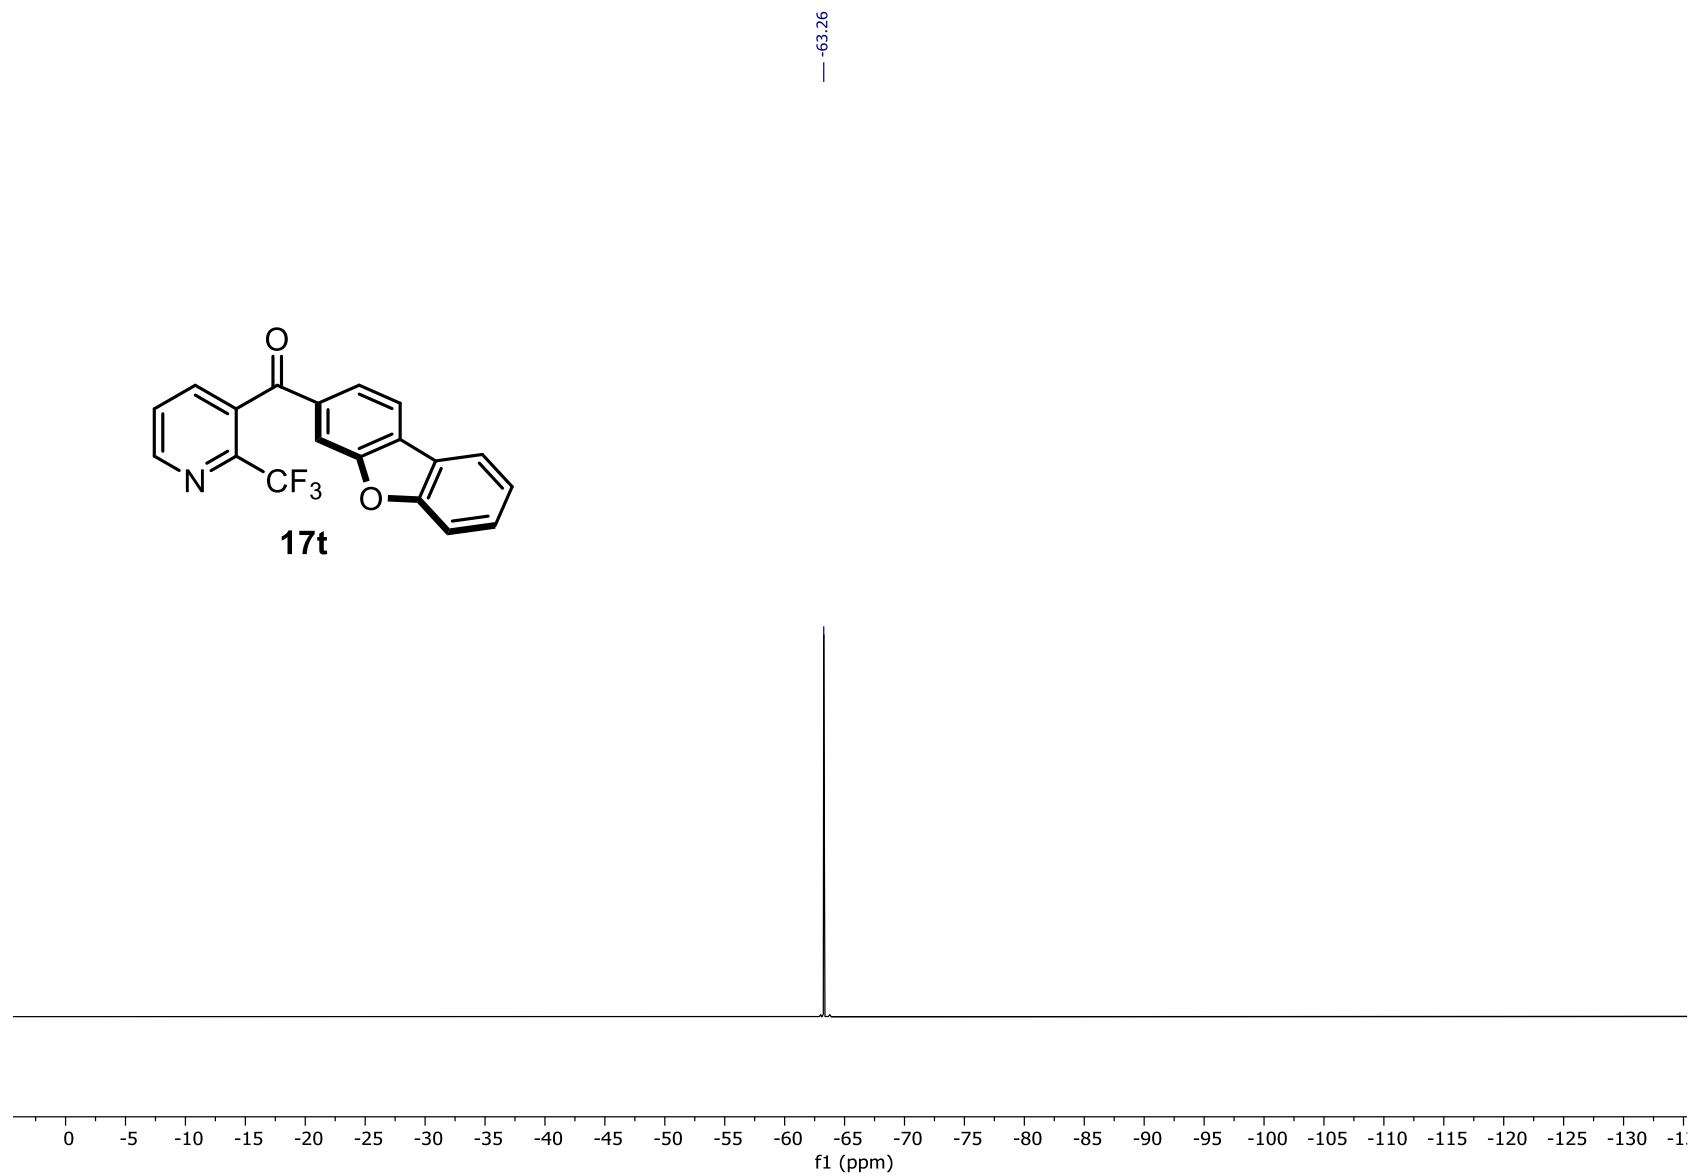

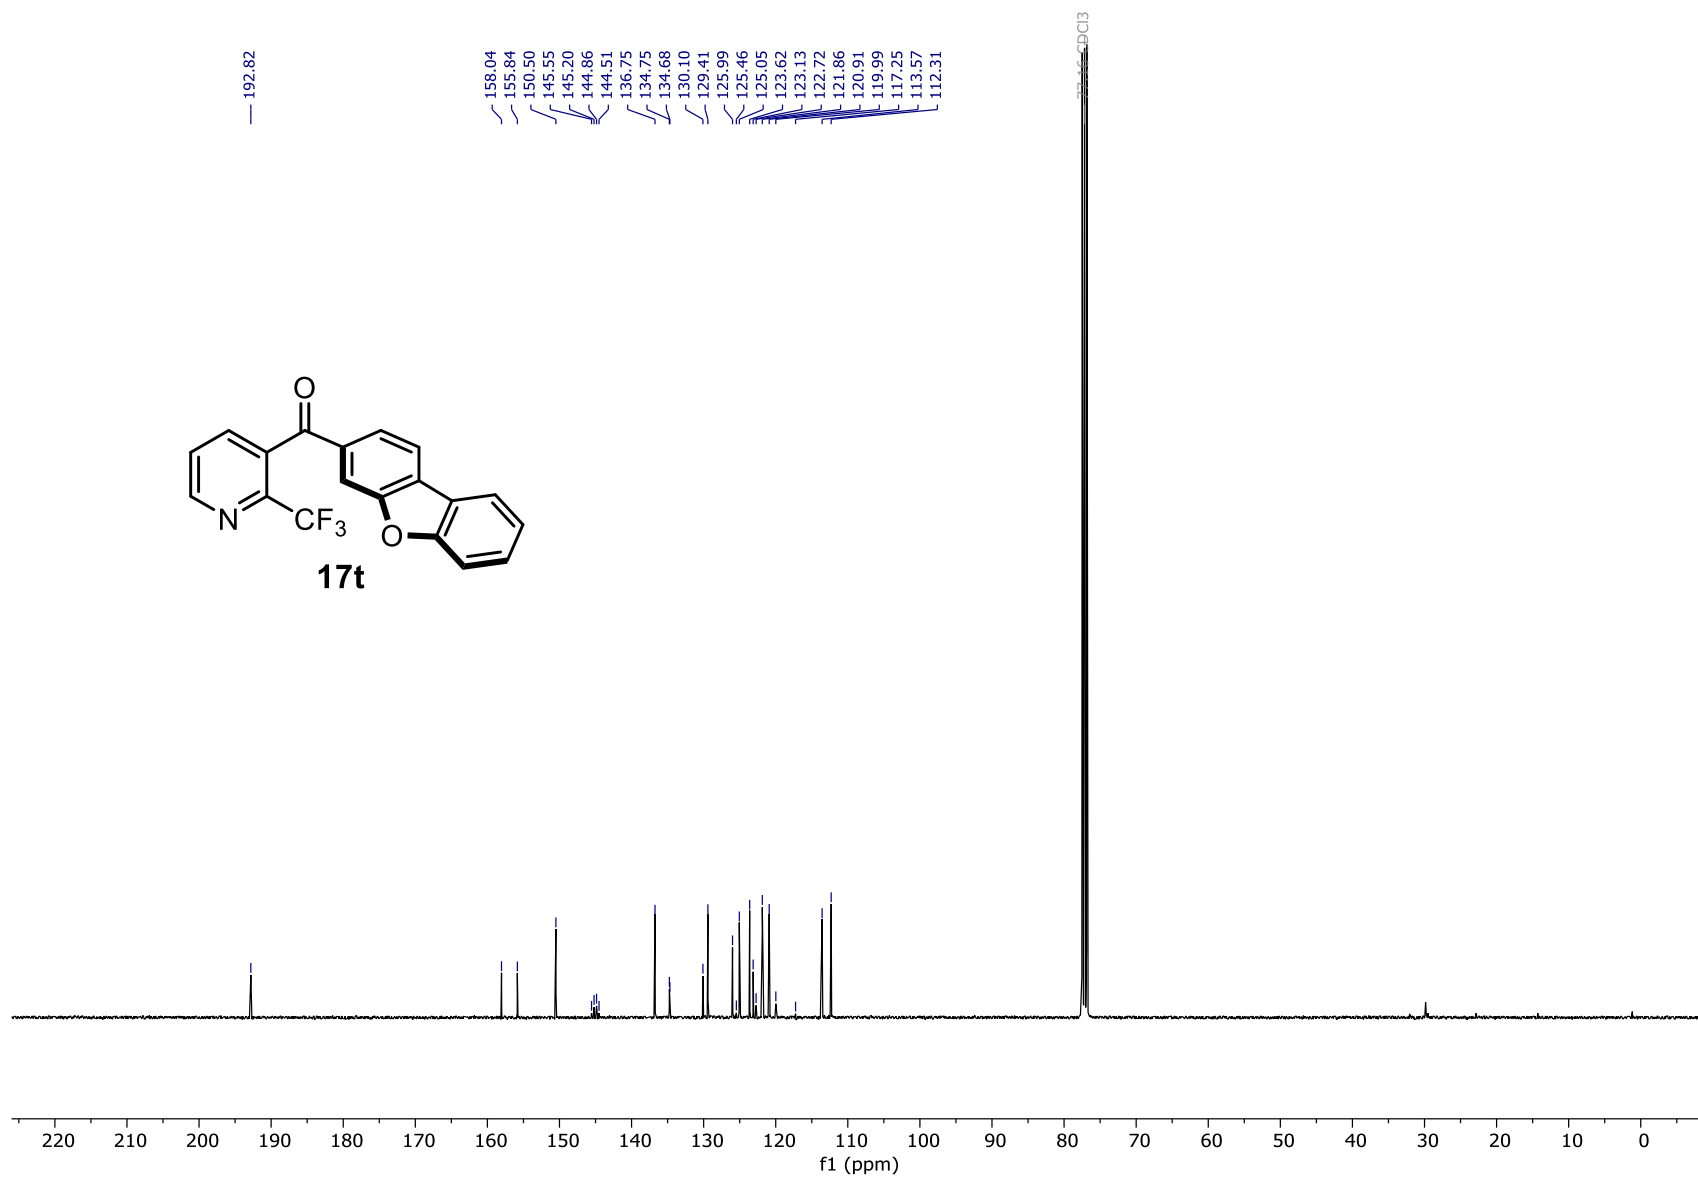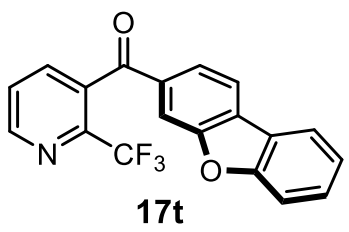

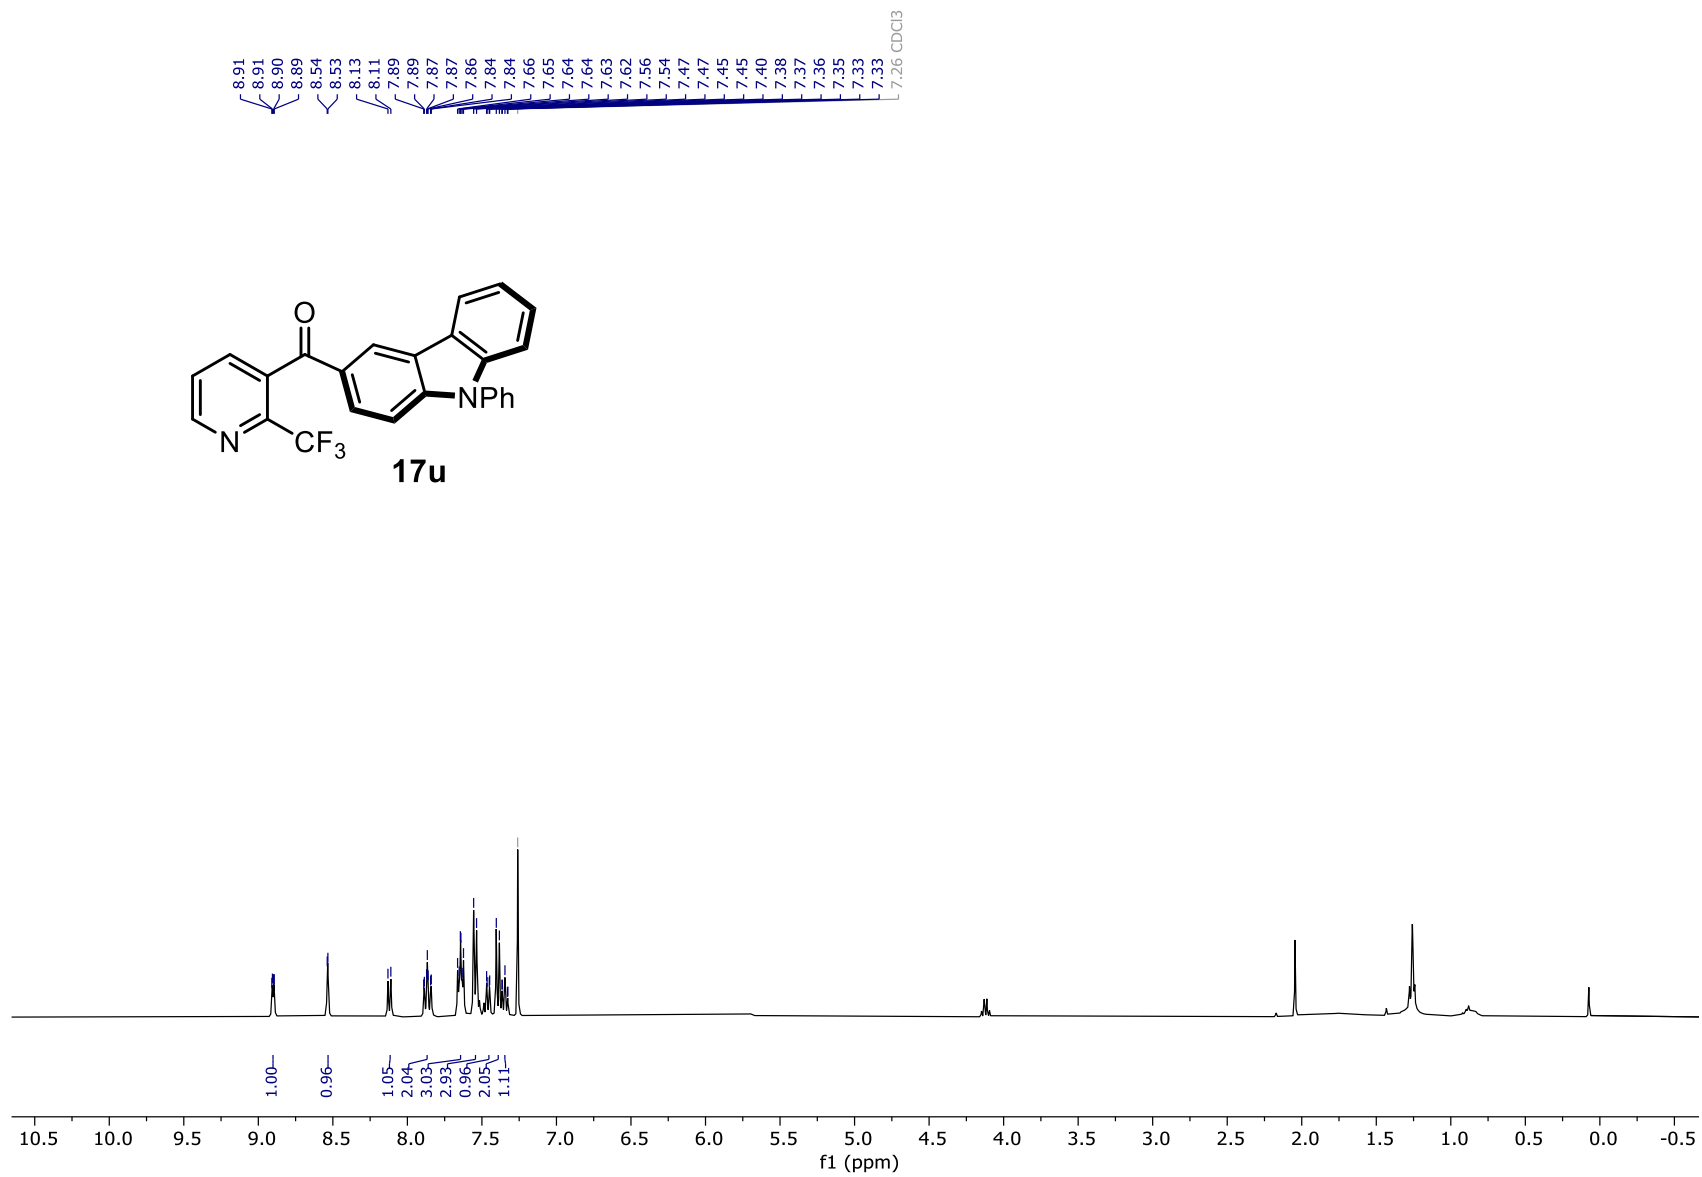

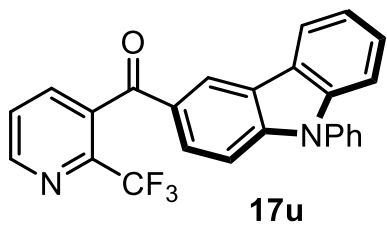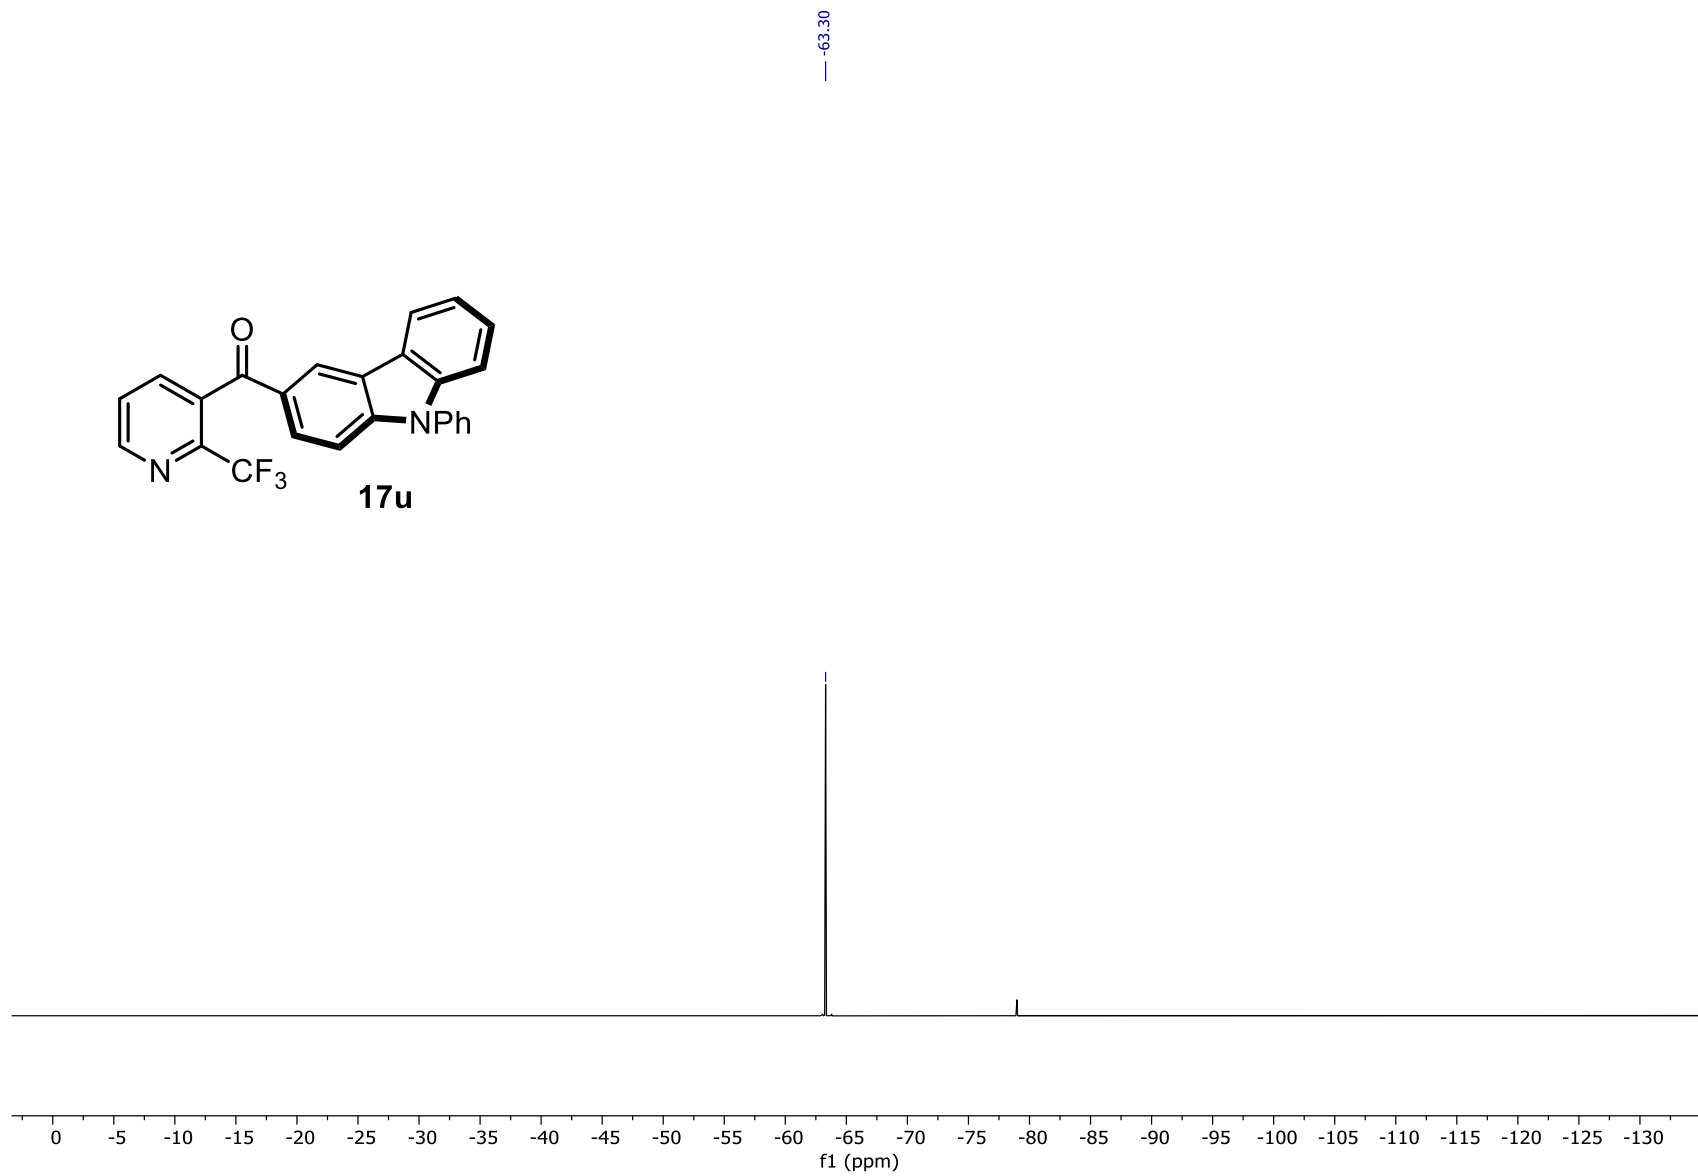

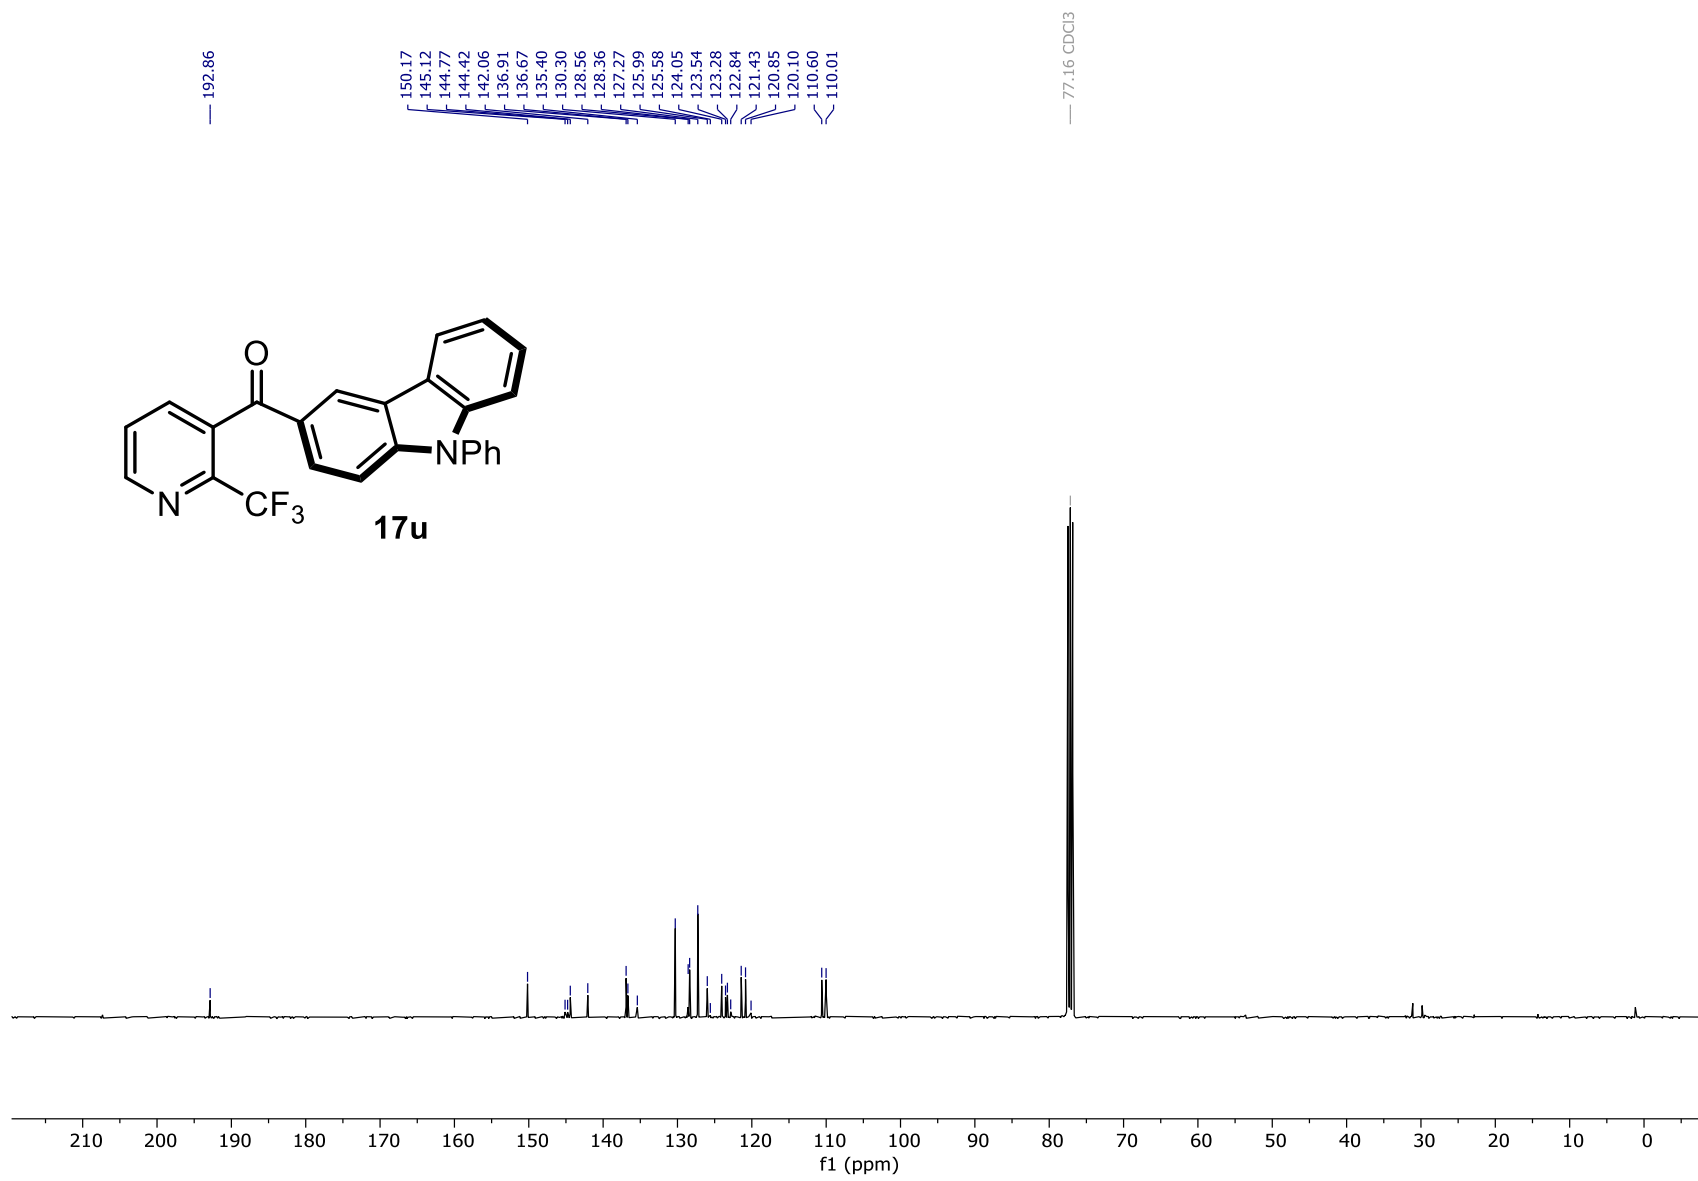

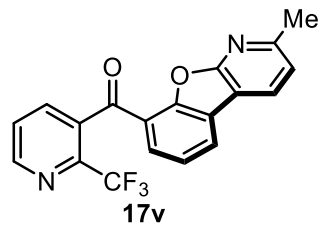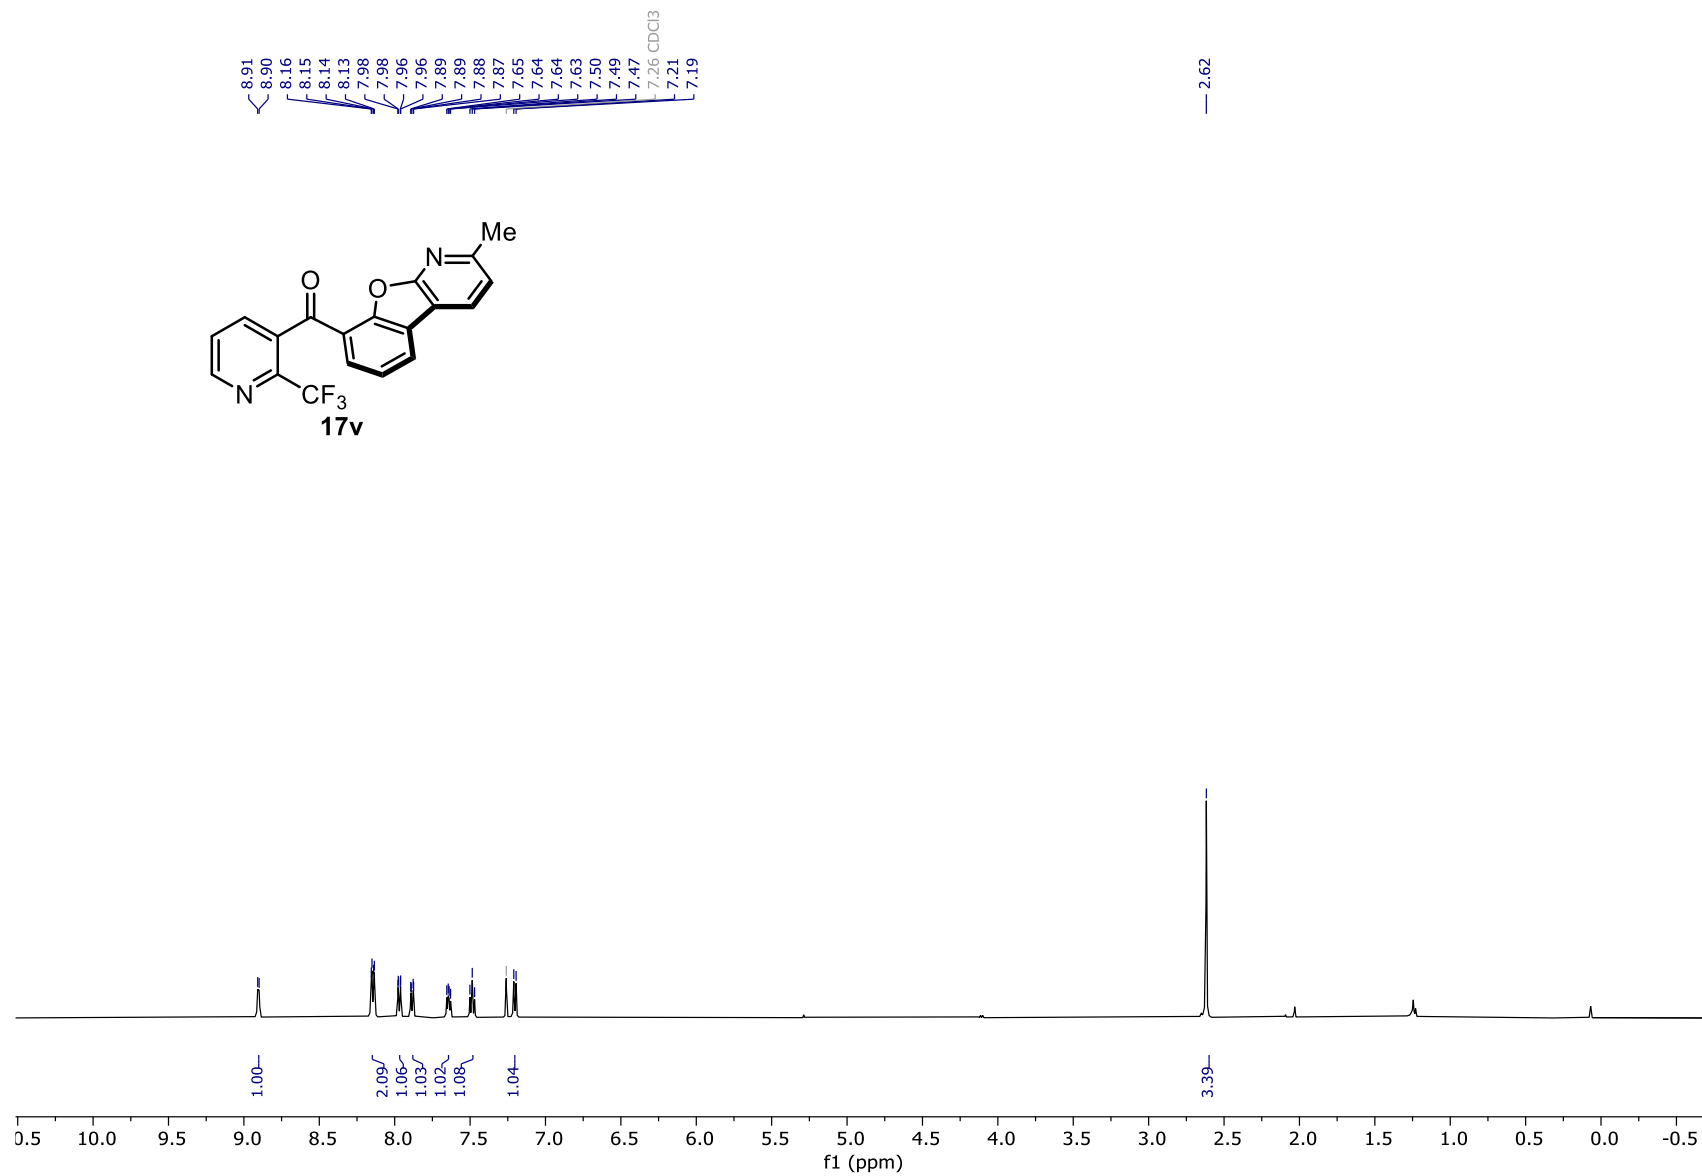

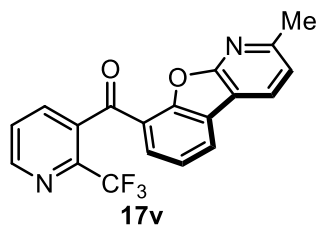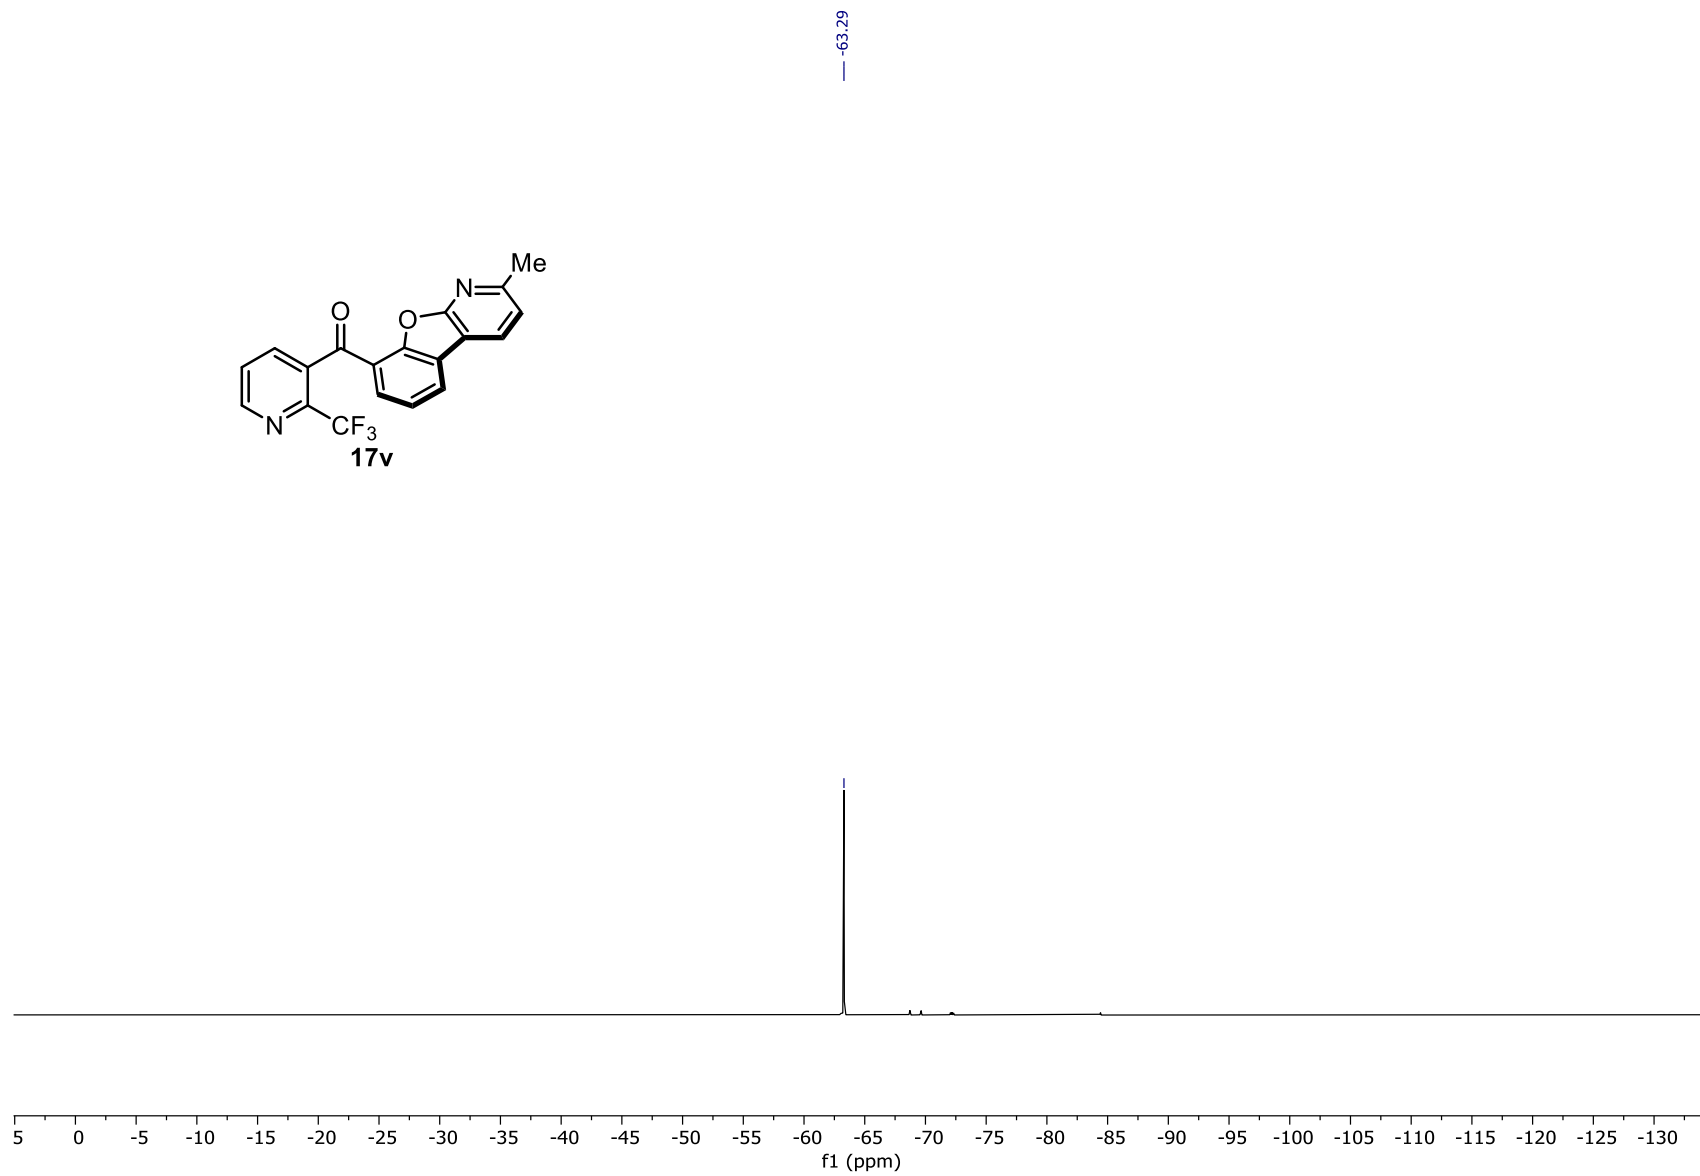

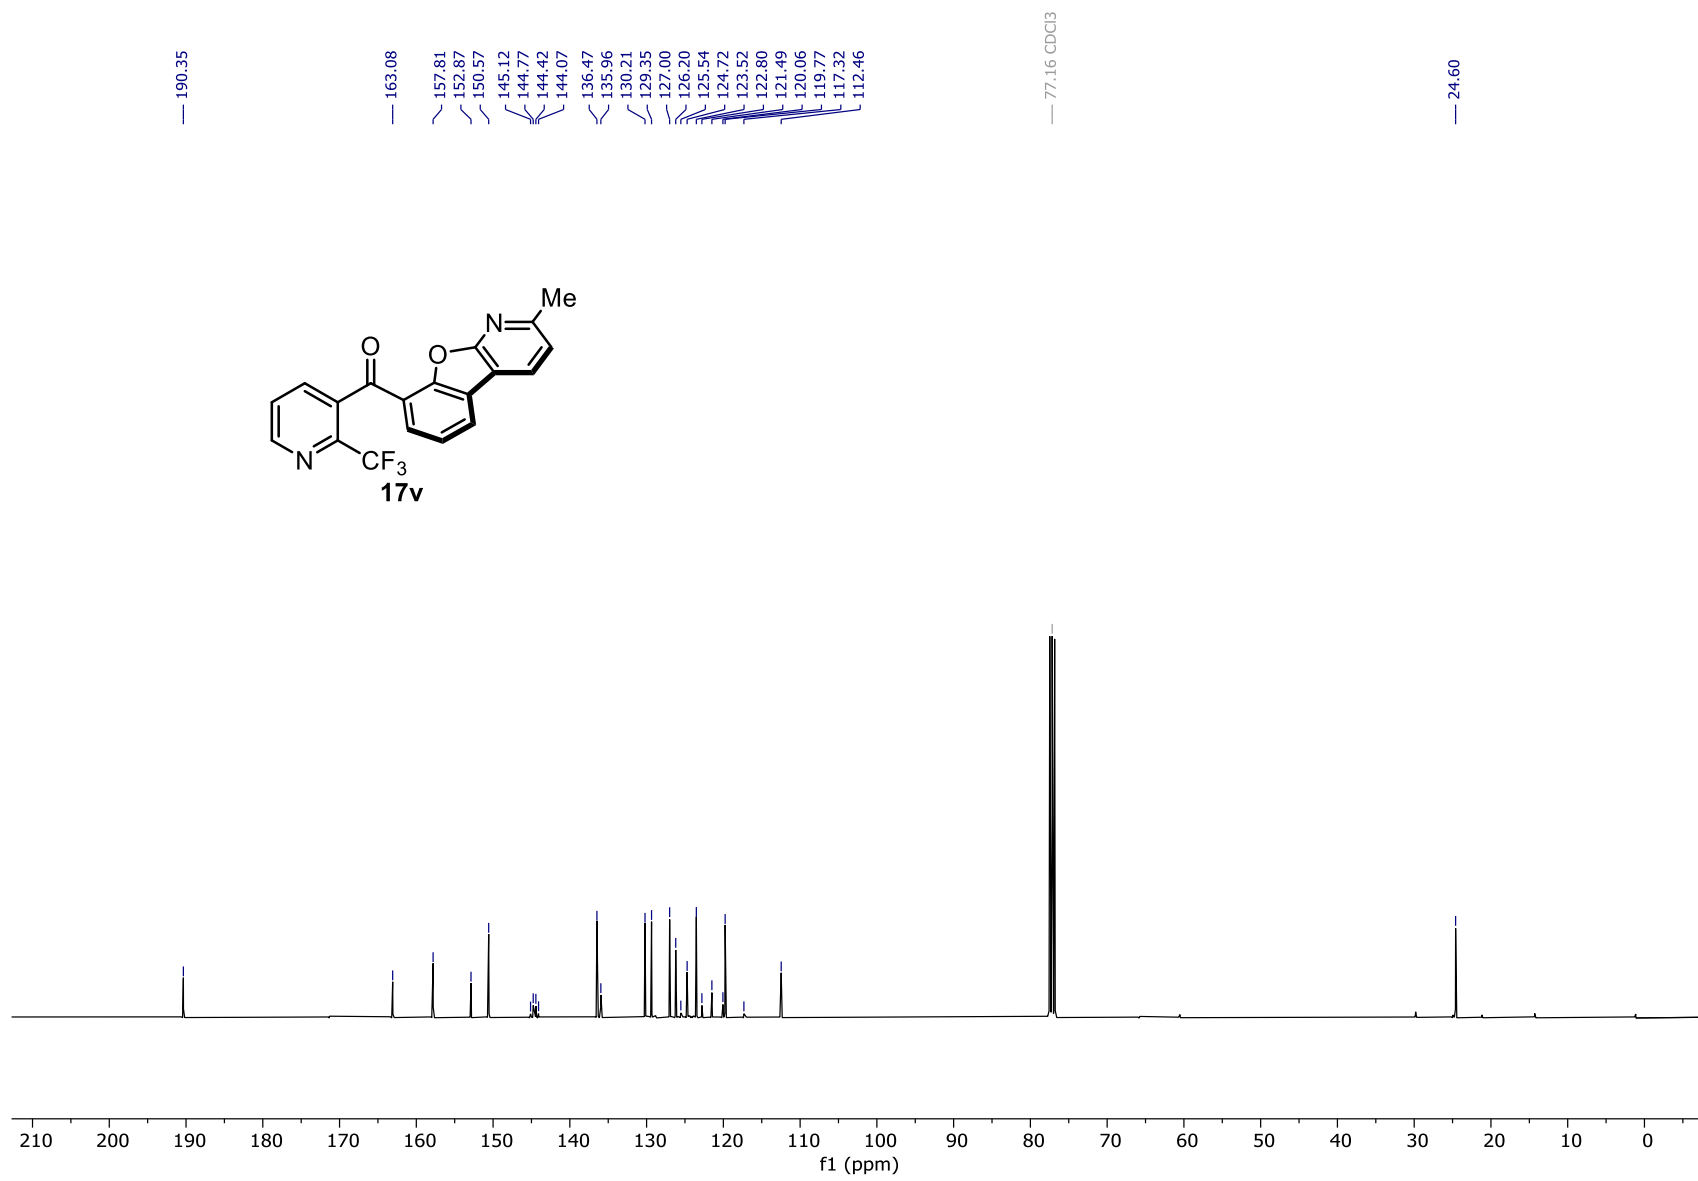

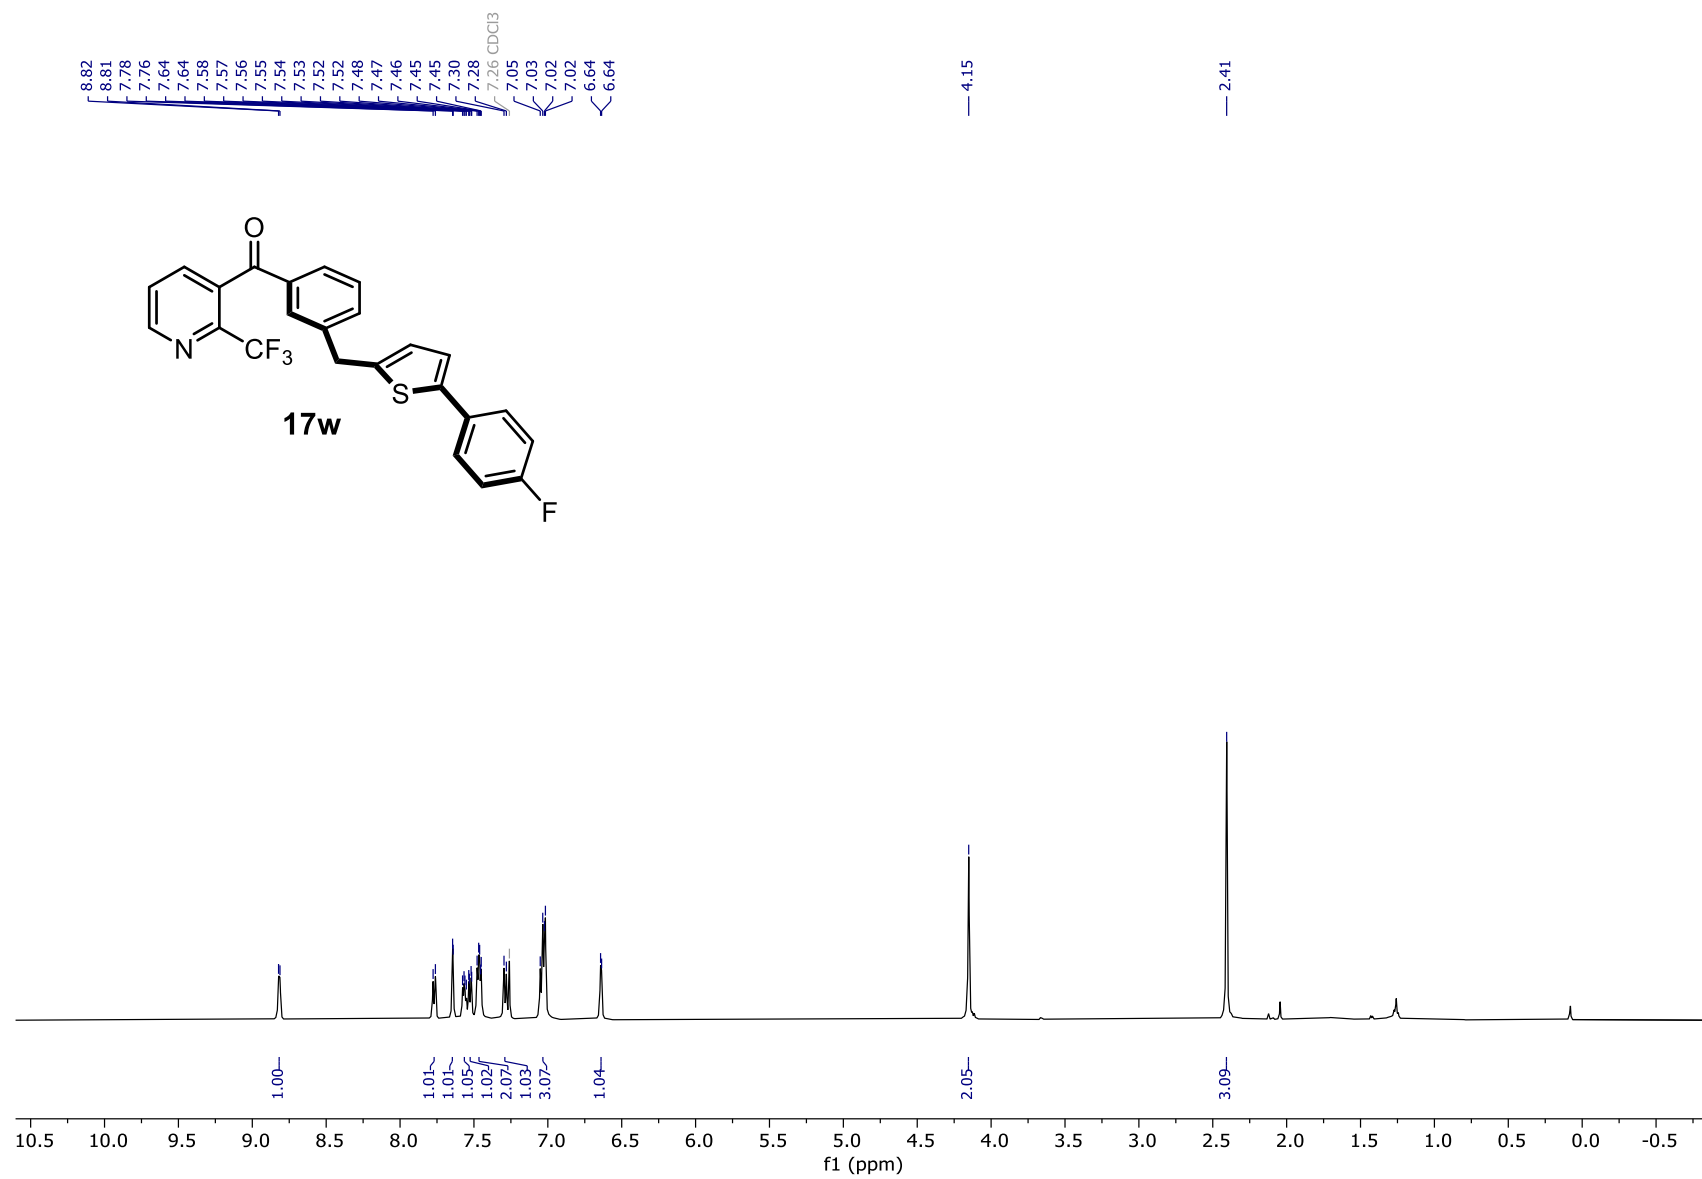



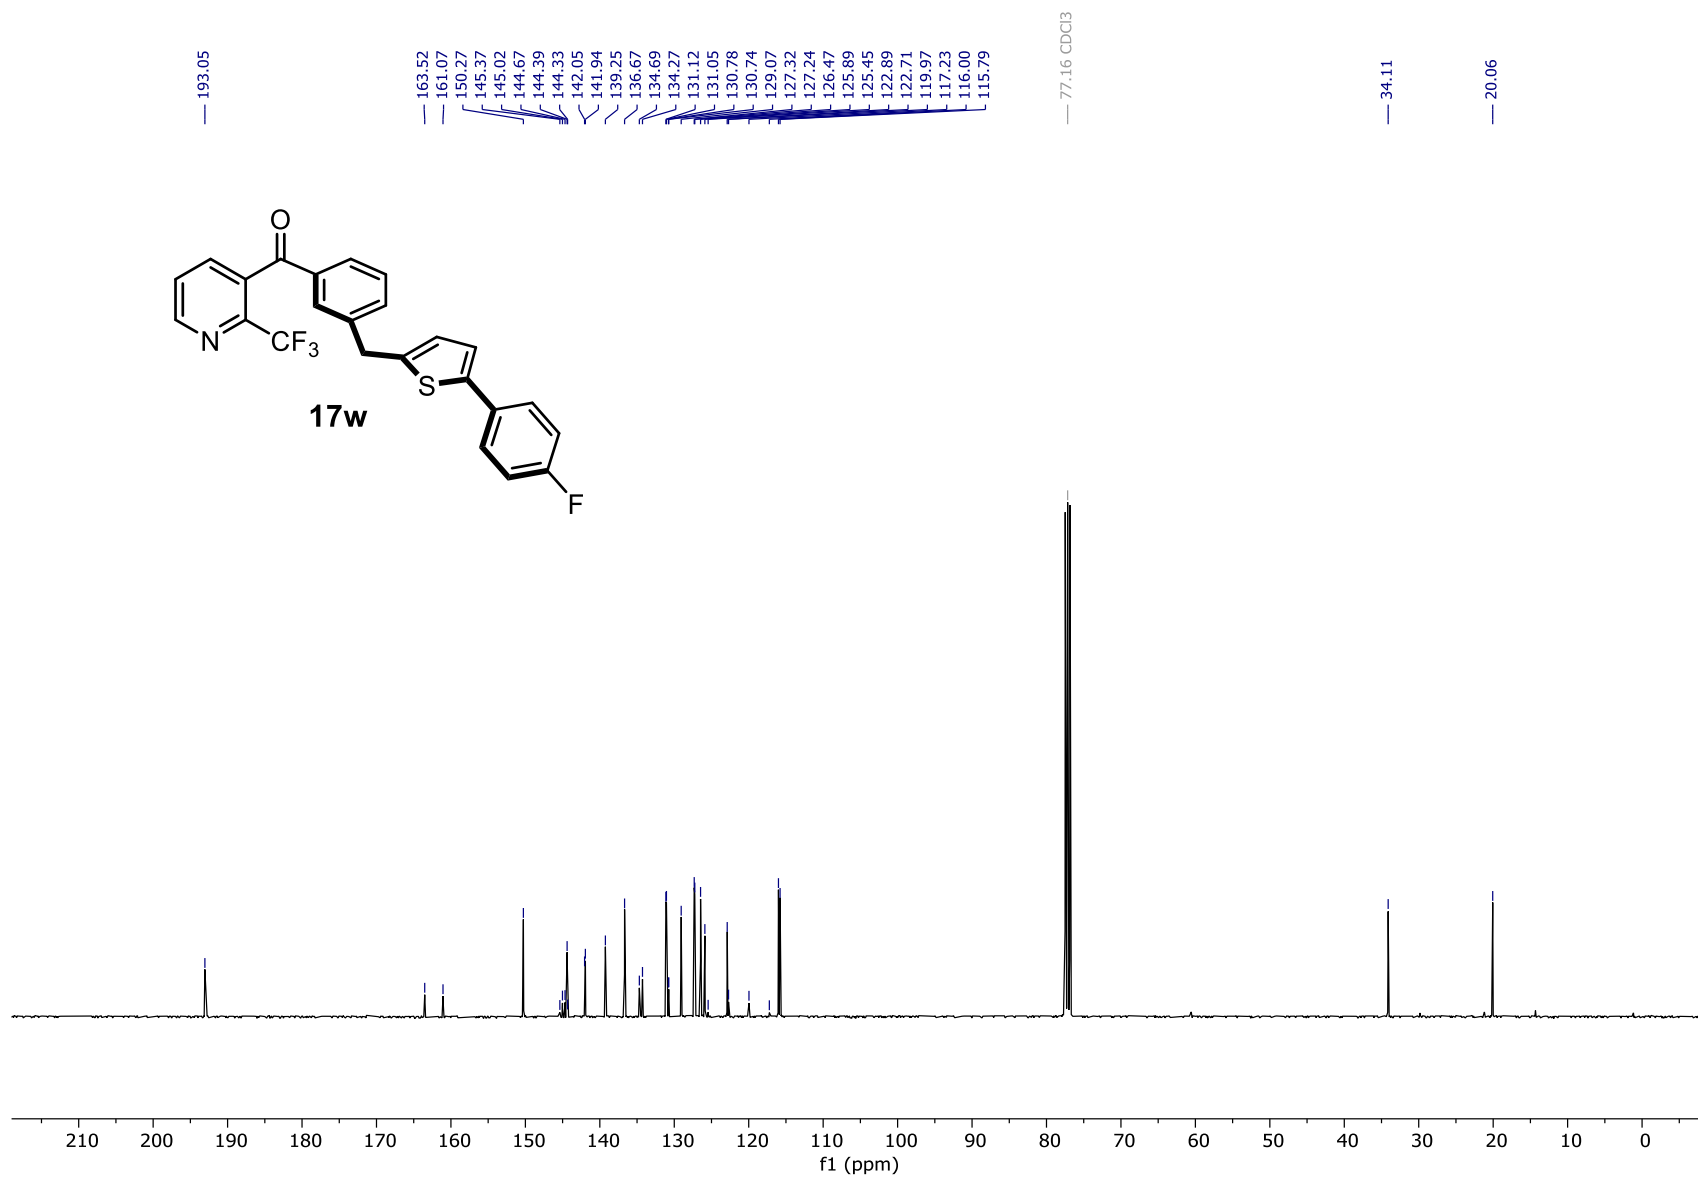

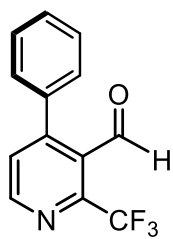

19a

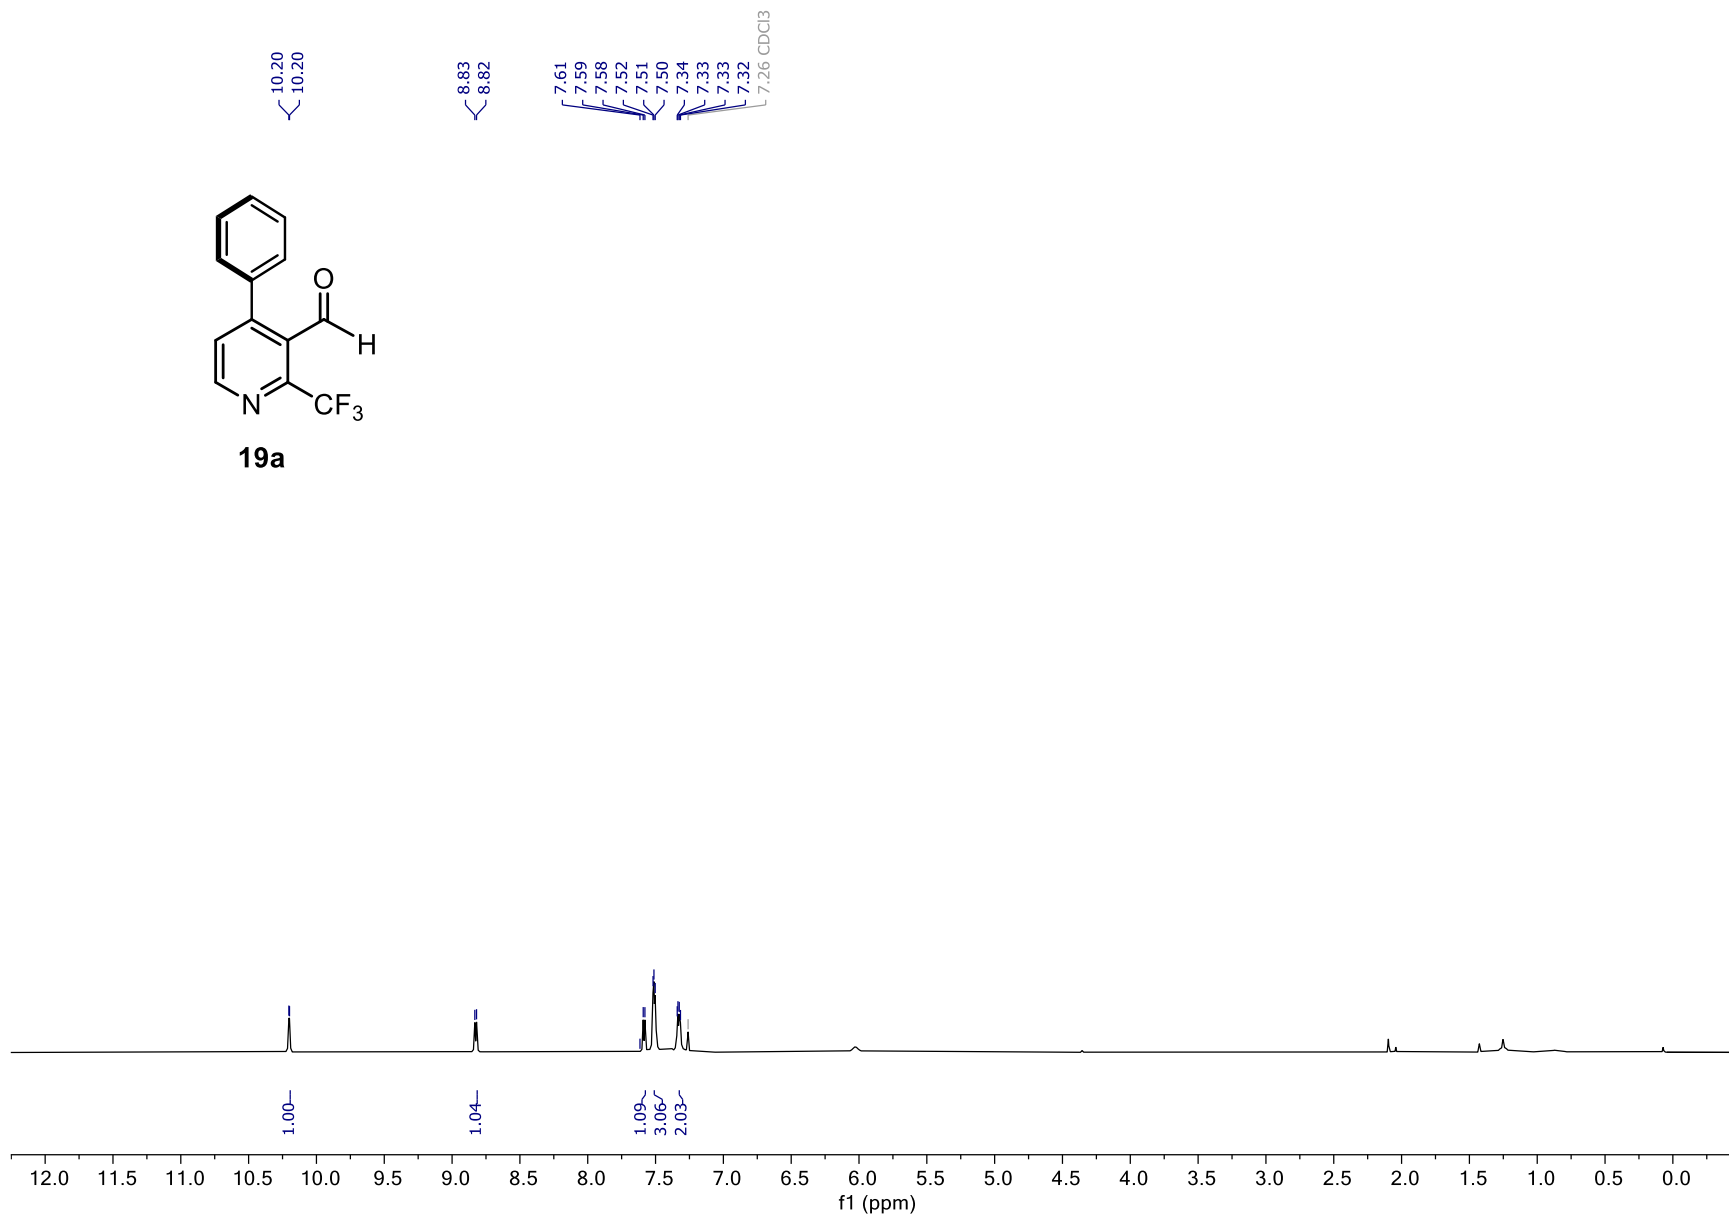

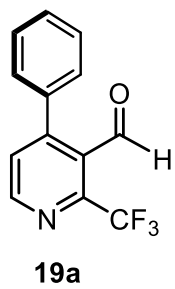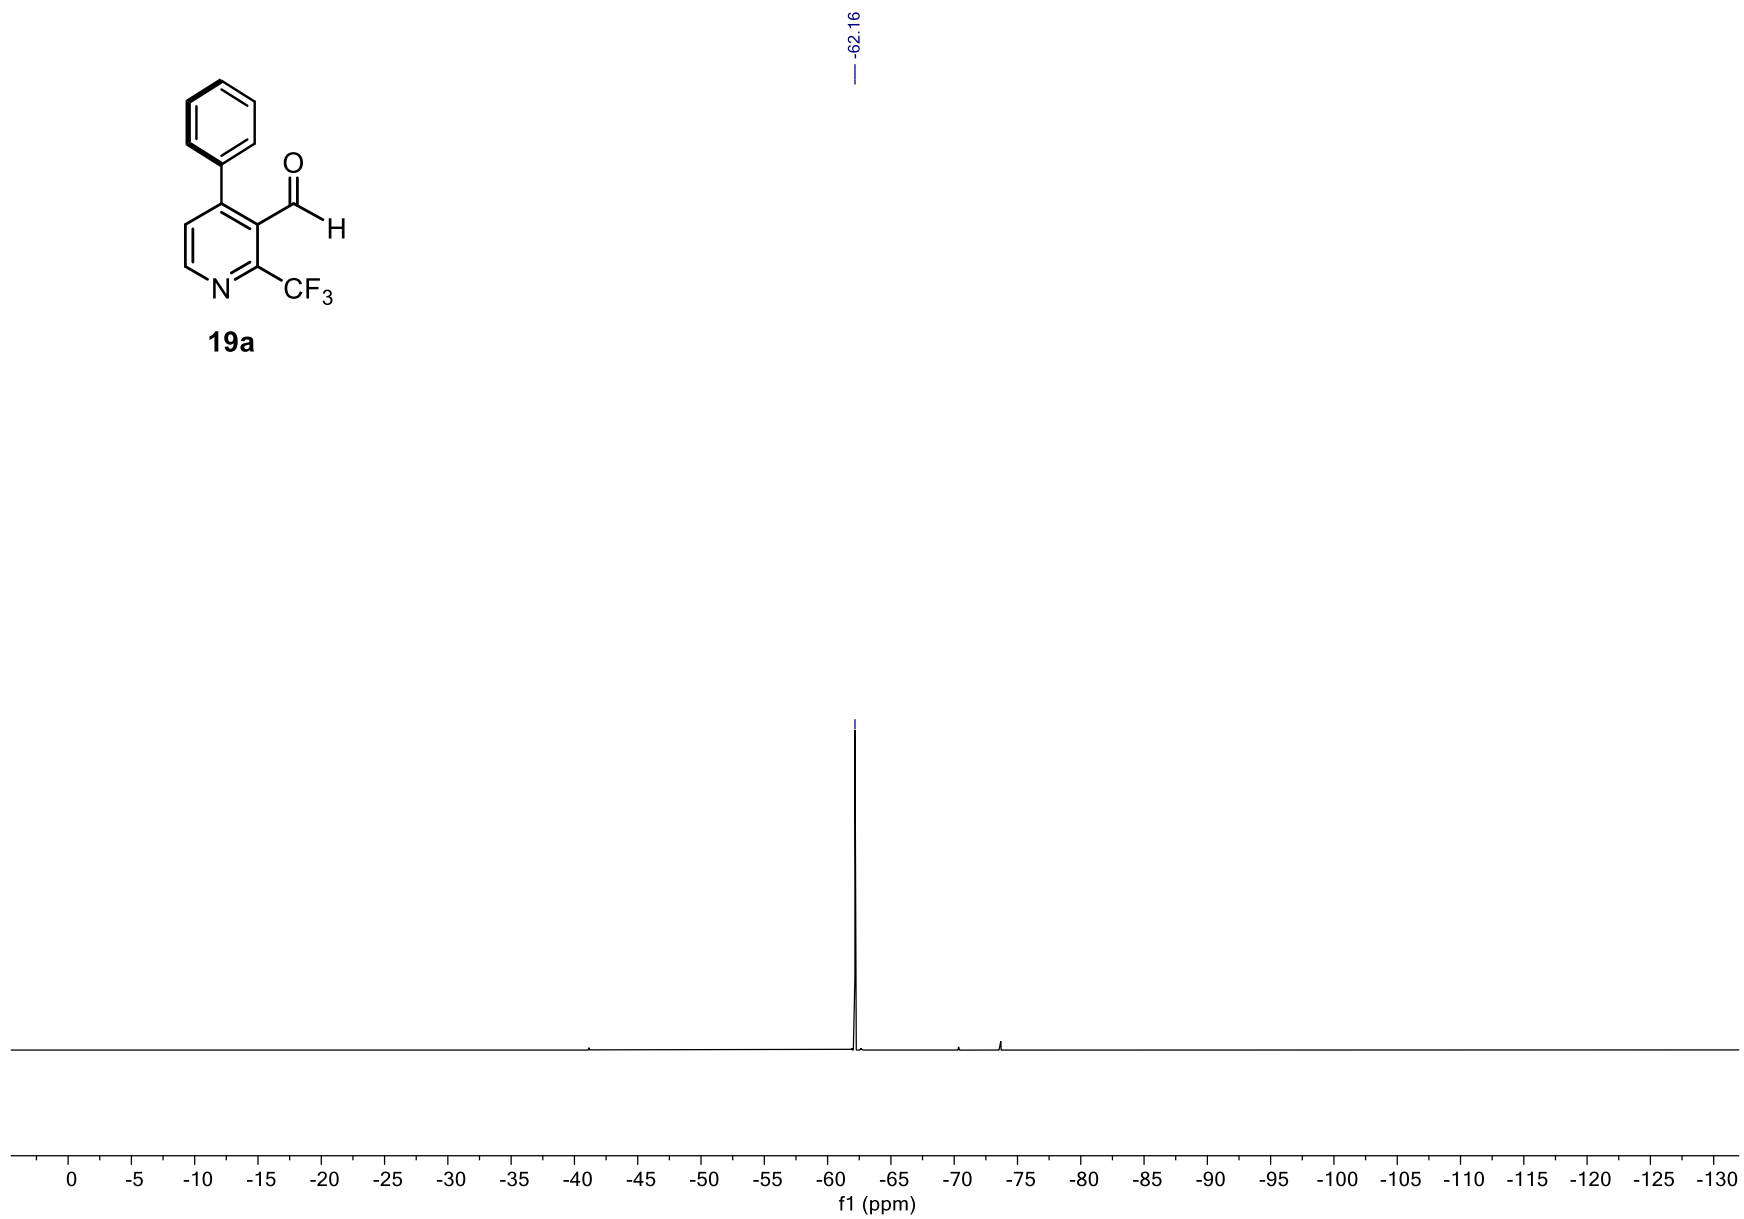

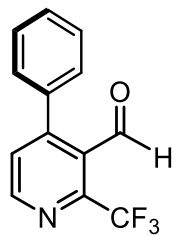

**19a**

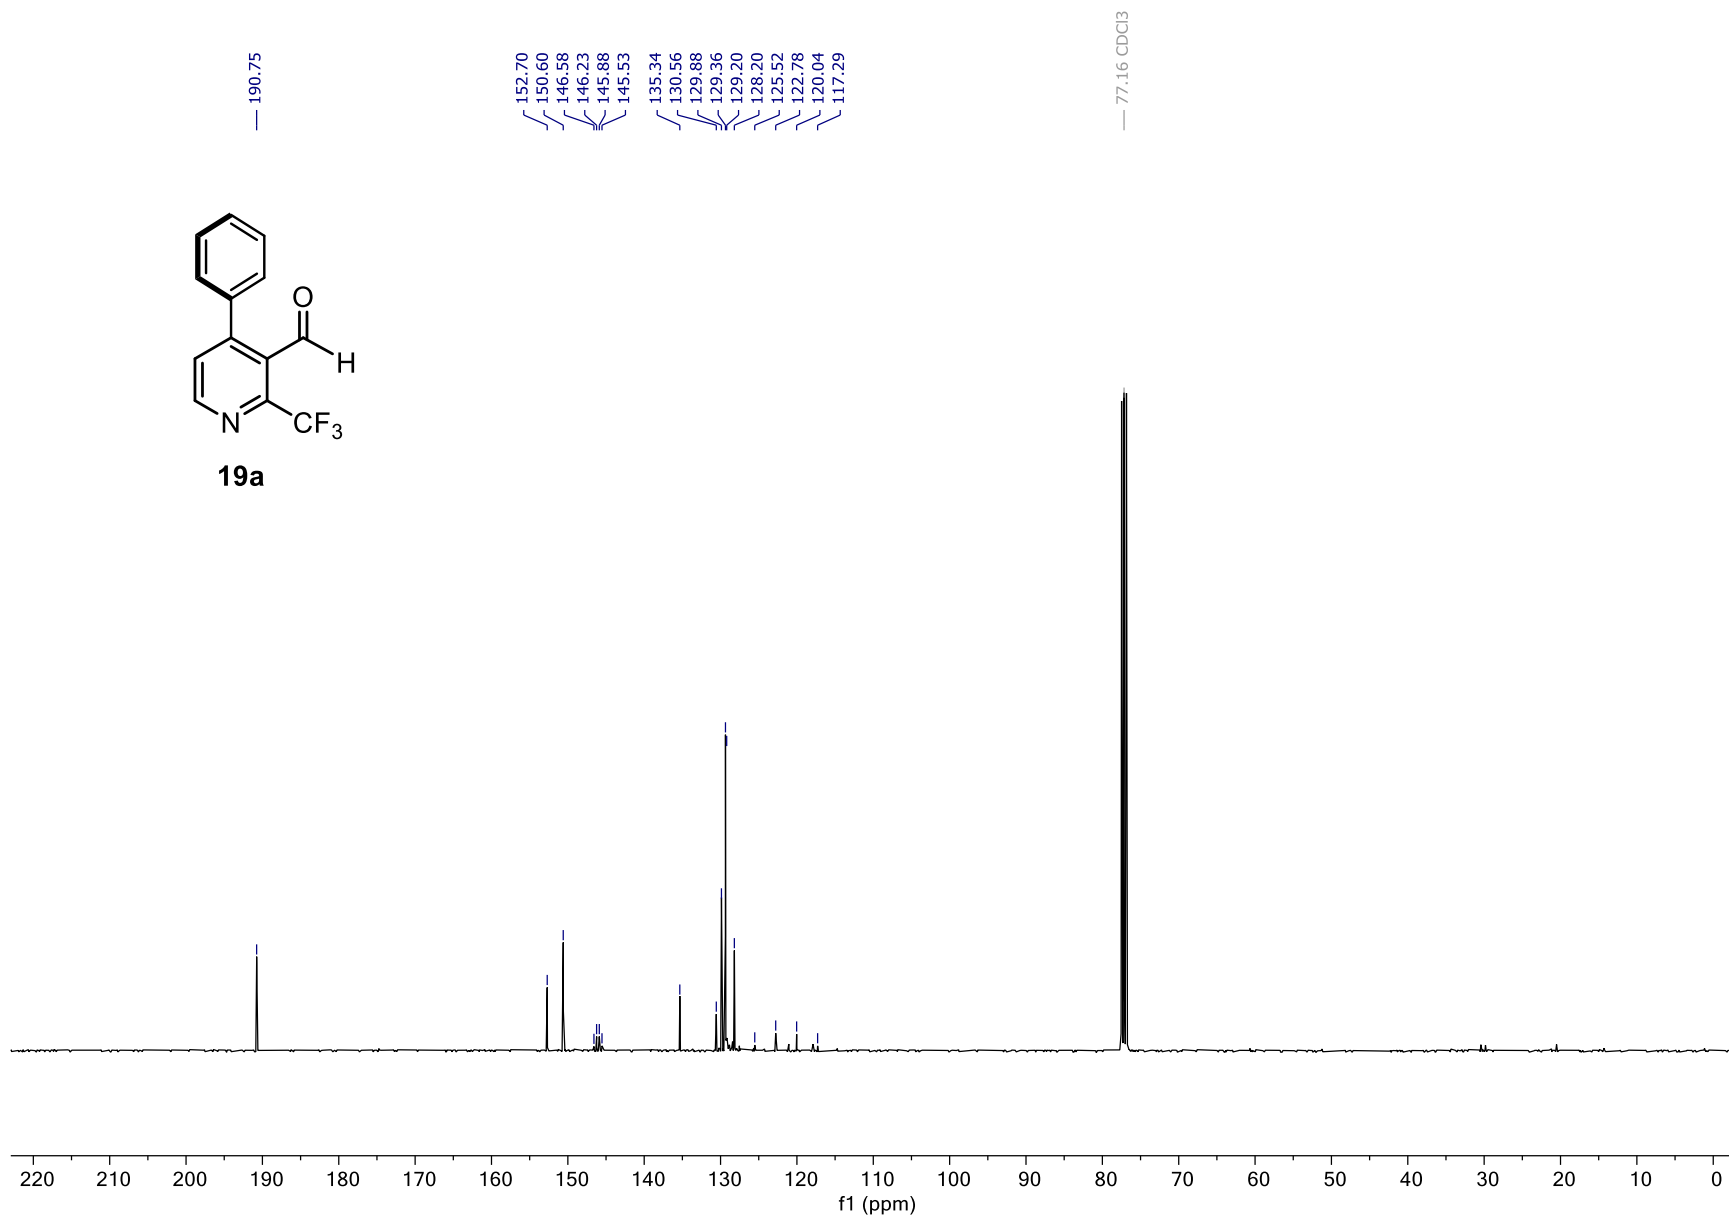

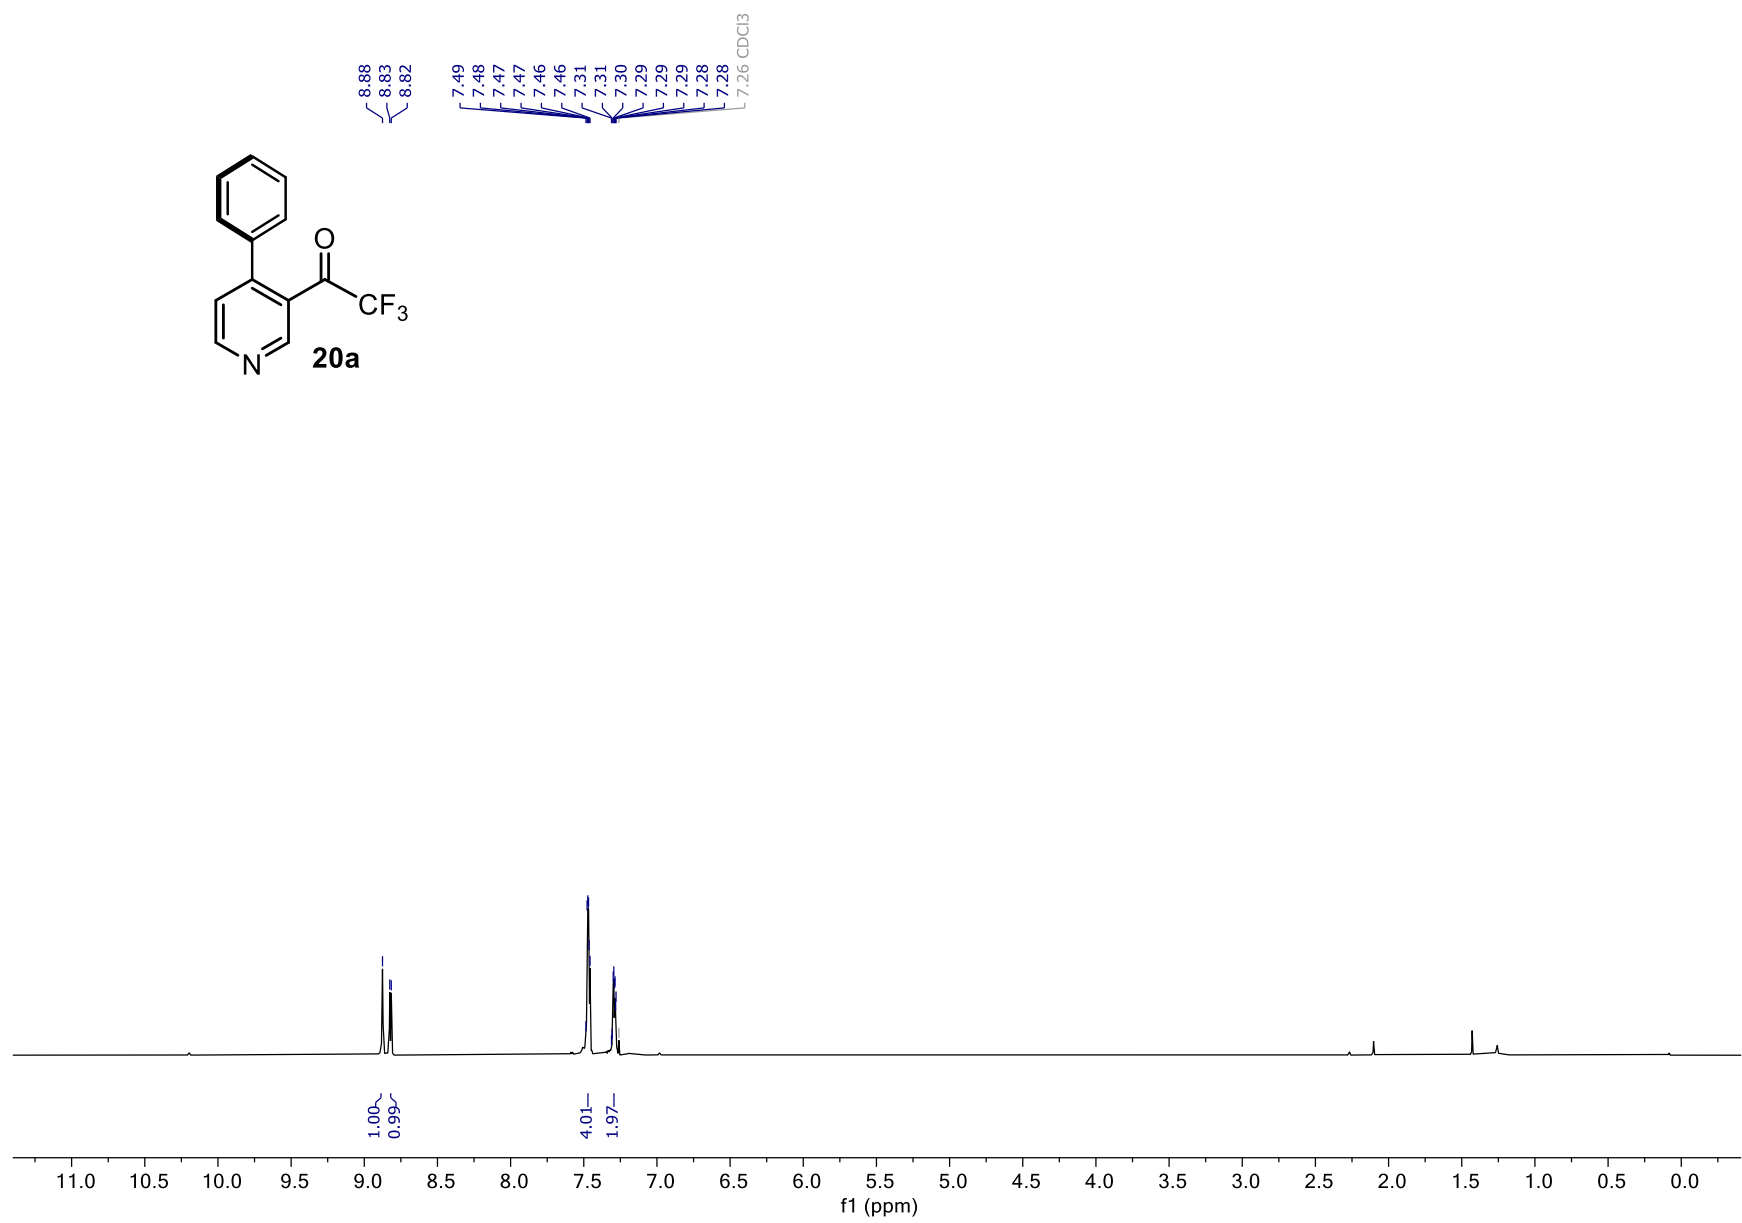

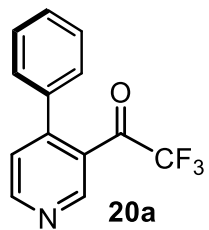

—73.71

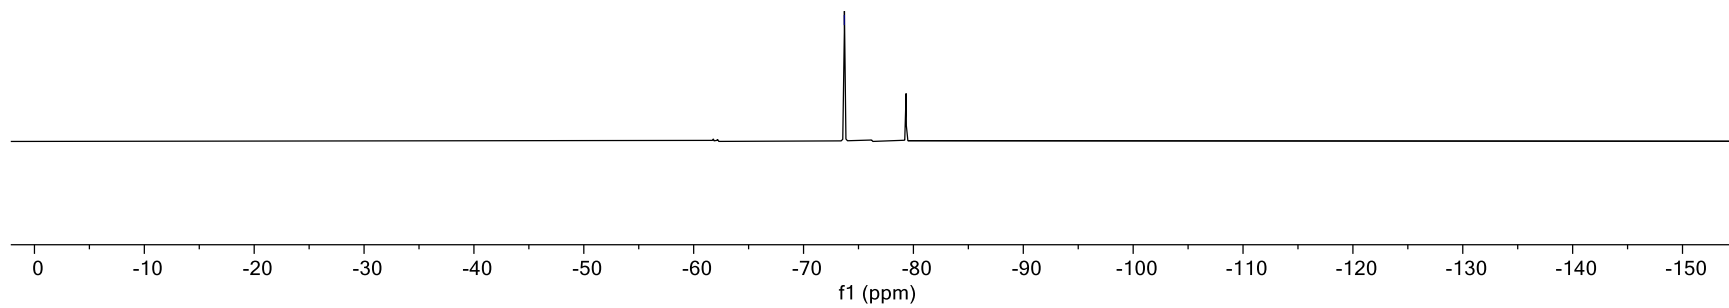

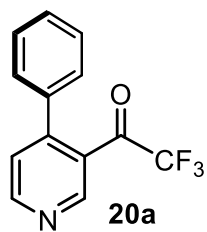

185.54  
185.17  
184.80  
184.42

152.97  
151.23  
148.98

136.87

129.69  
129.23  
128.36  
125.53

119.96  
117.06  
114.16  
111.26

77.16 CDCl<sub>3</sub>

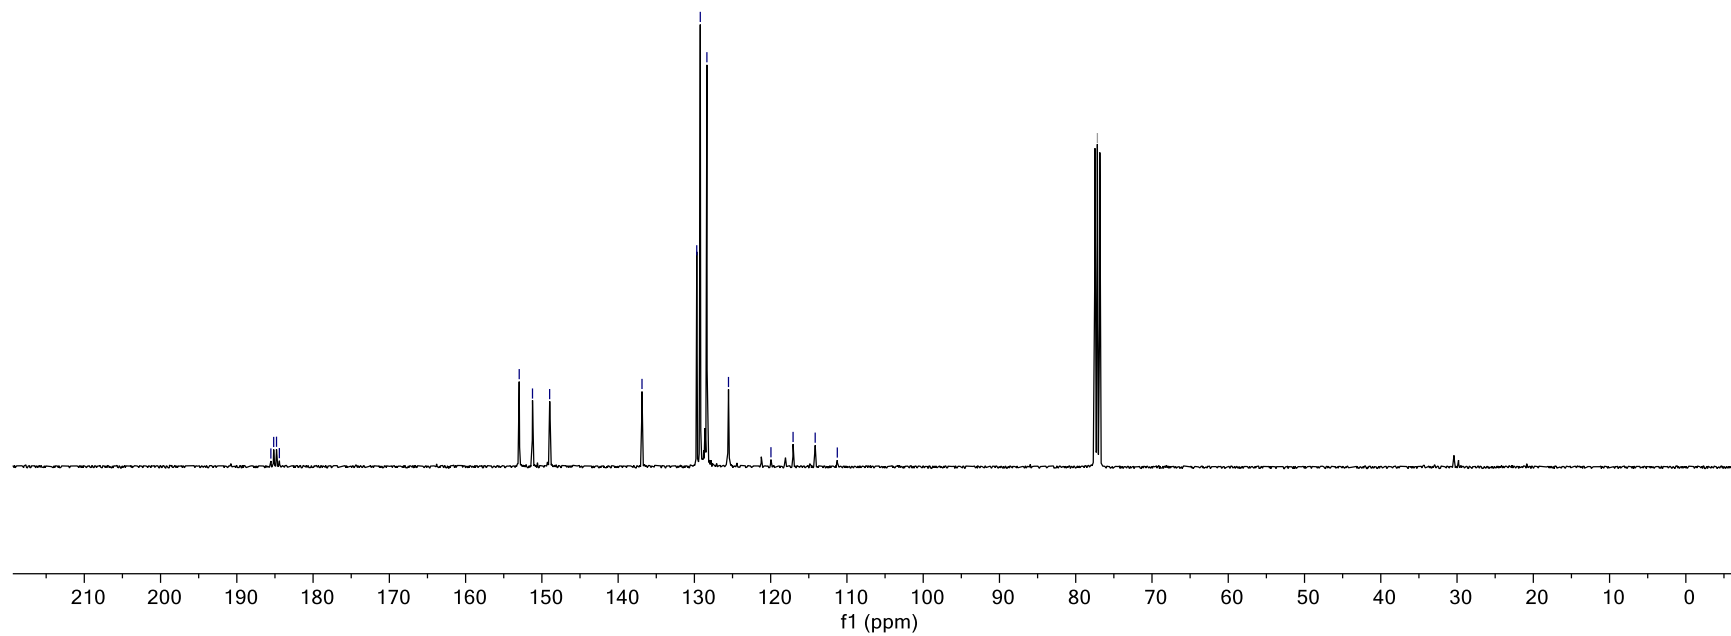

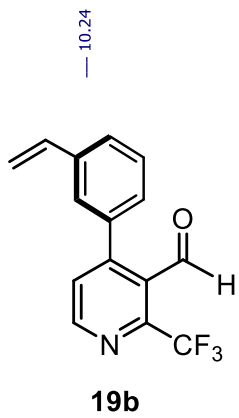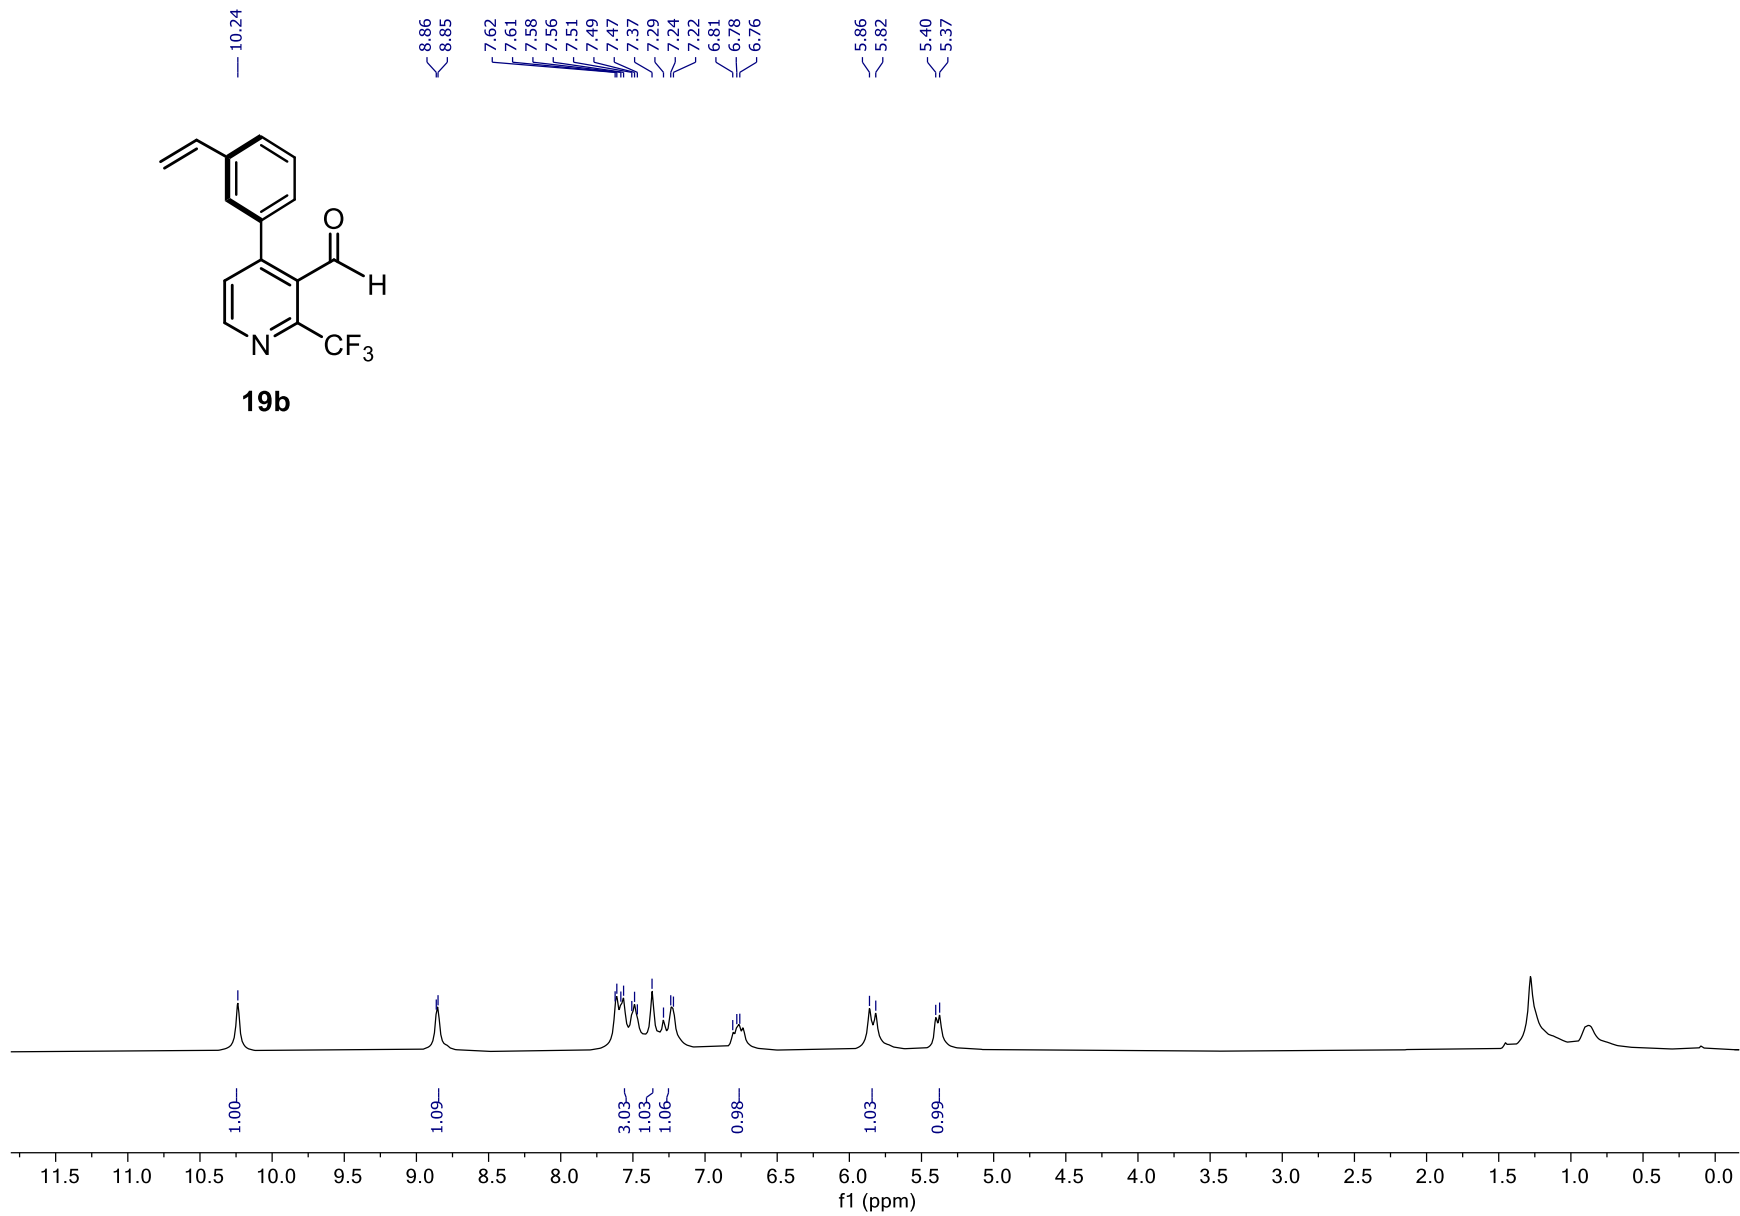

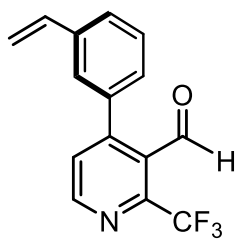

19b

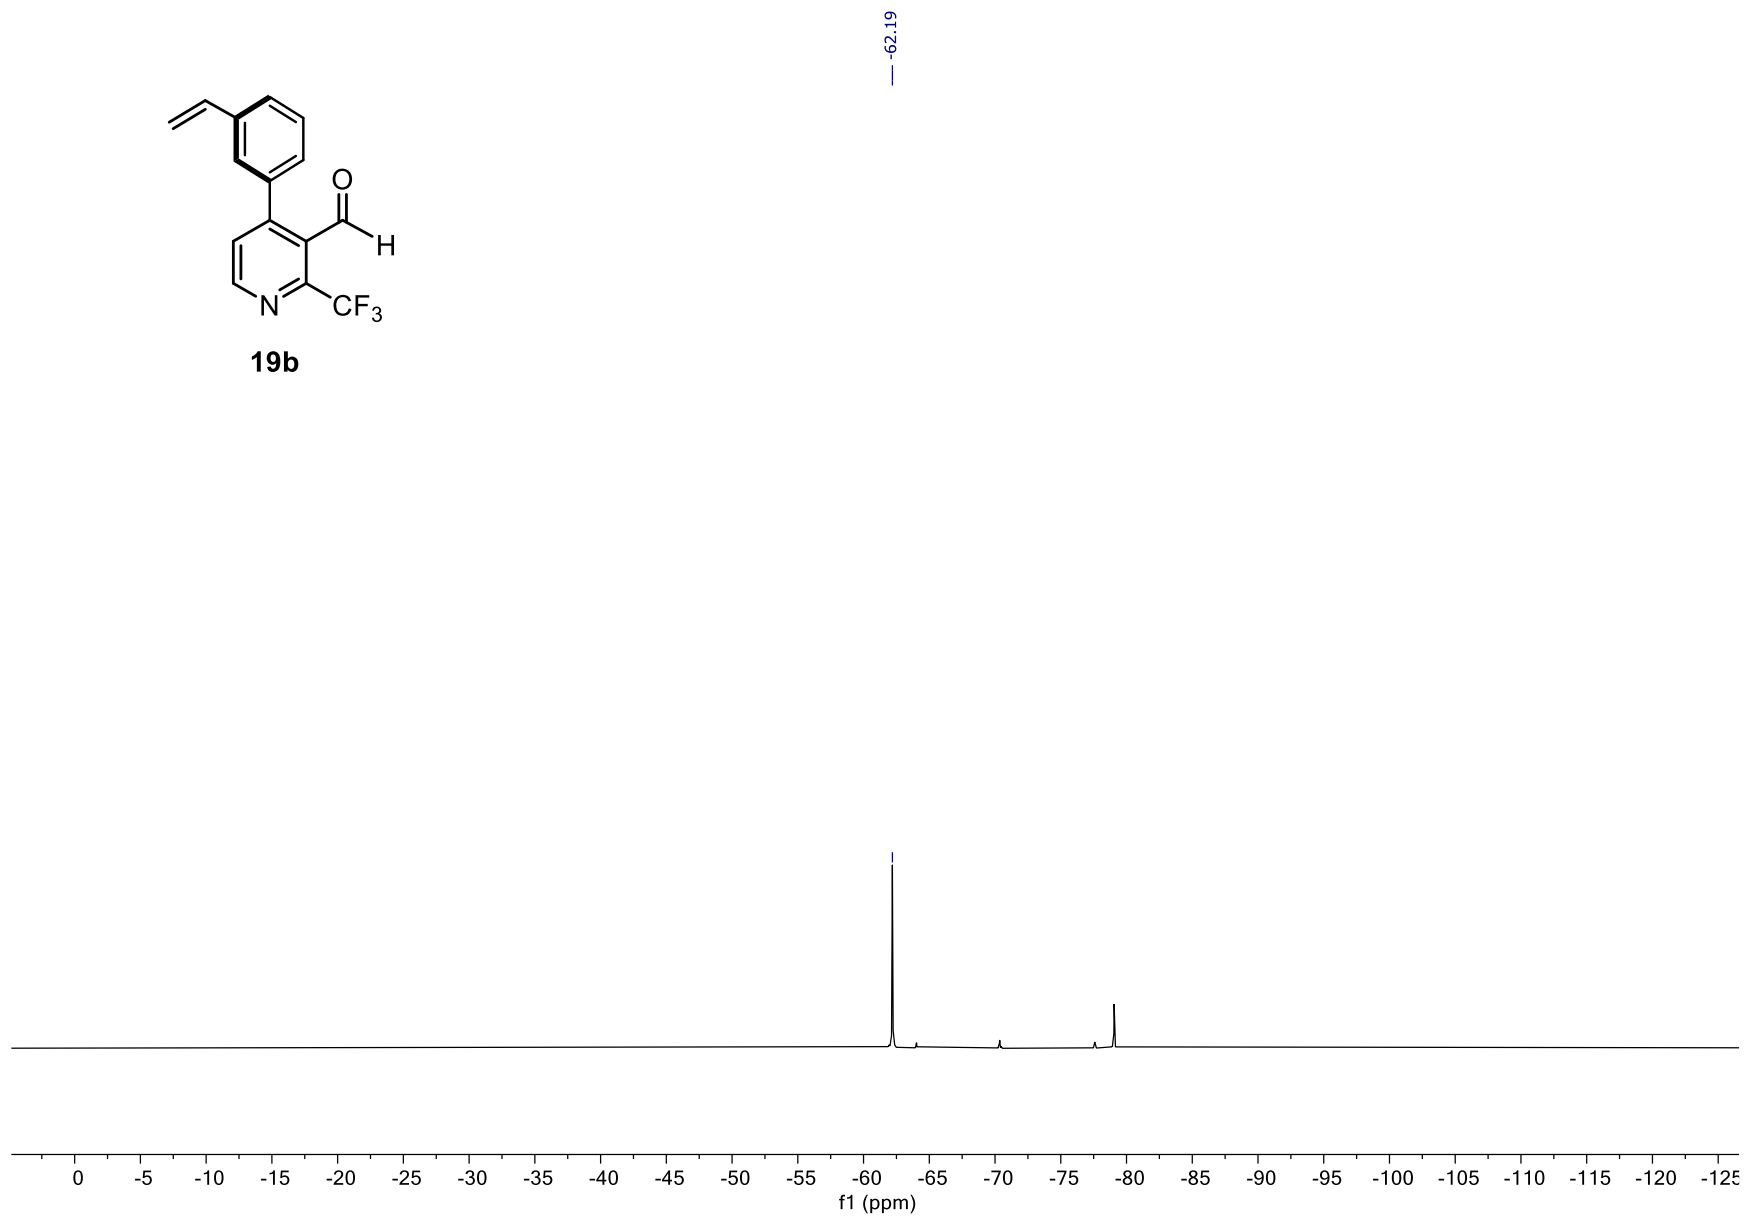

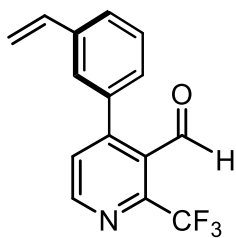

**19b**

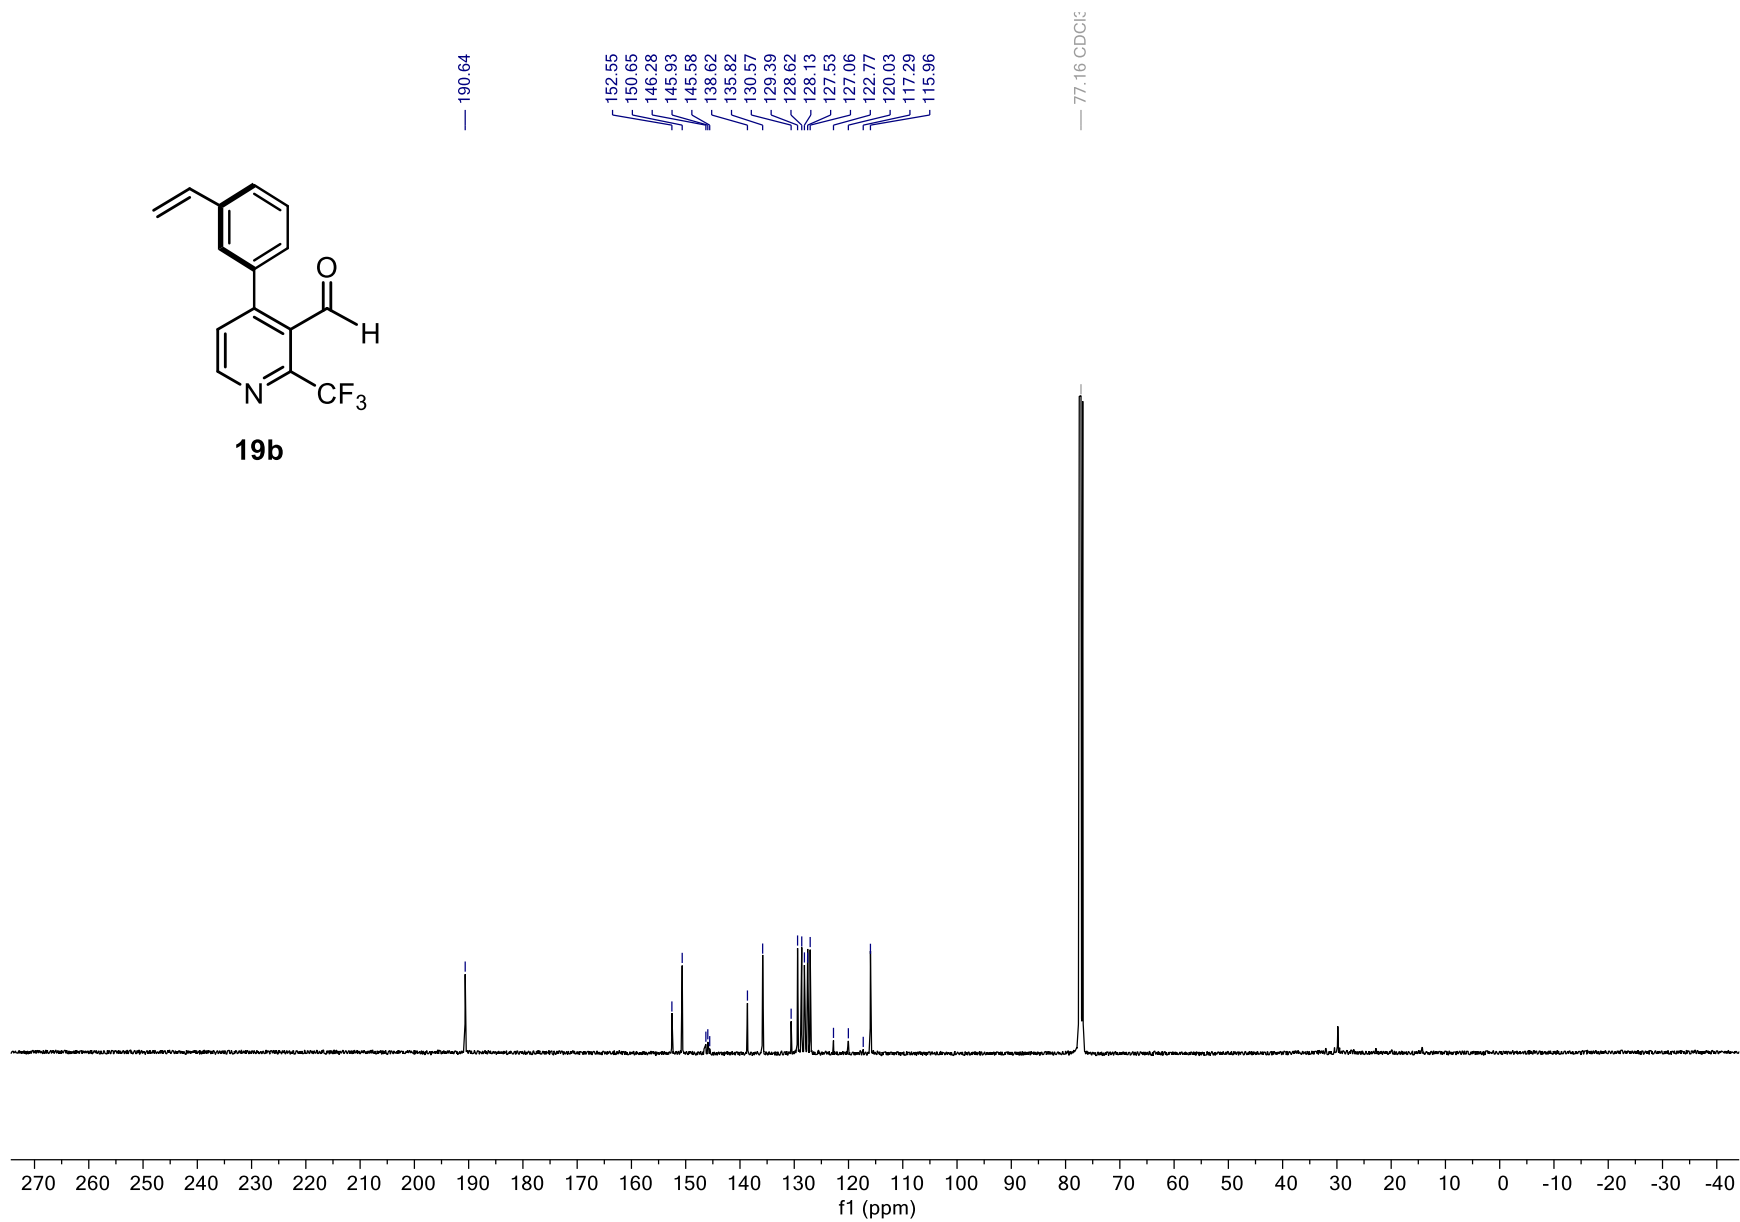

8.89  
8.85  
8.83  
7.54  
7.53  
7.53  
7.52  
7.51  
7.51  
7.50  
7.49  
7.45  
7.43  
7.41  
7.32  
7.32  
7.31  
7.26 CDCl<sub>3</sub>  
7.18  
7.18  
7.16  
7.16  
7.16  
6.77  
6.75  
6.73  
6.70  
5.81  
5.77  
5.35  
5.33

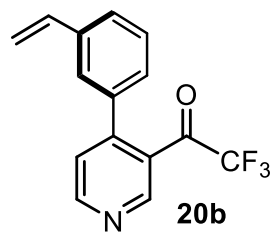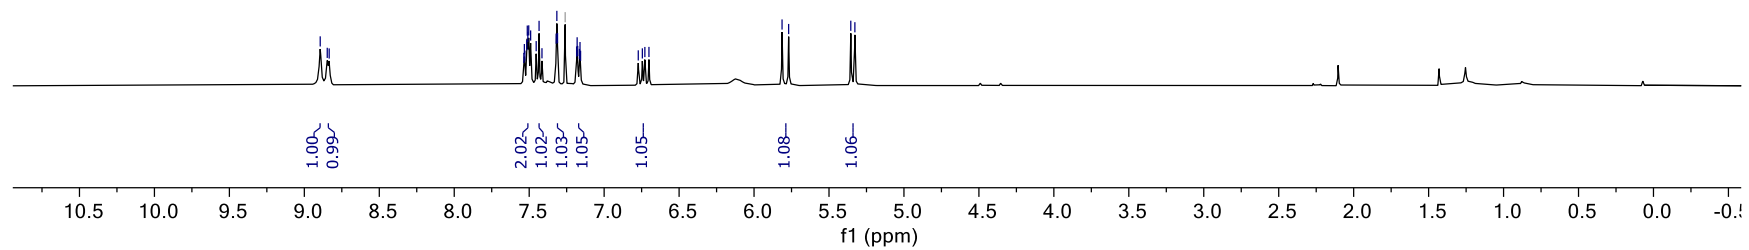

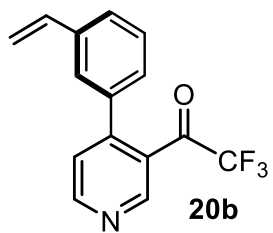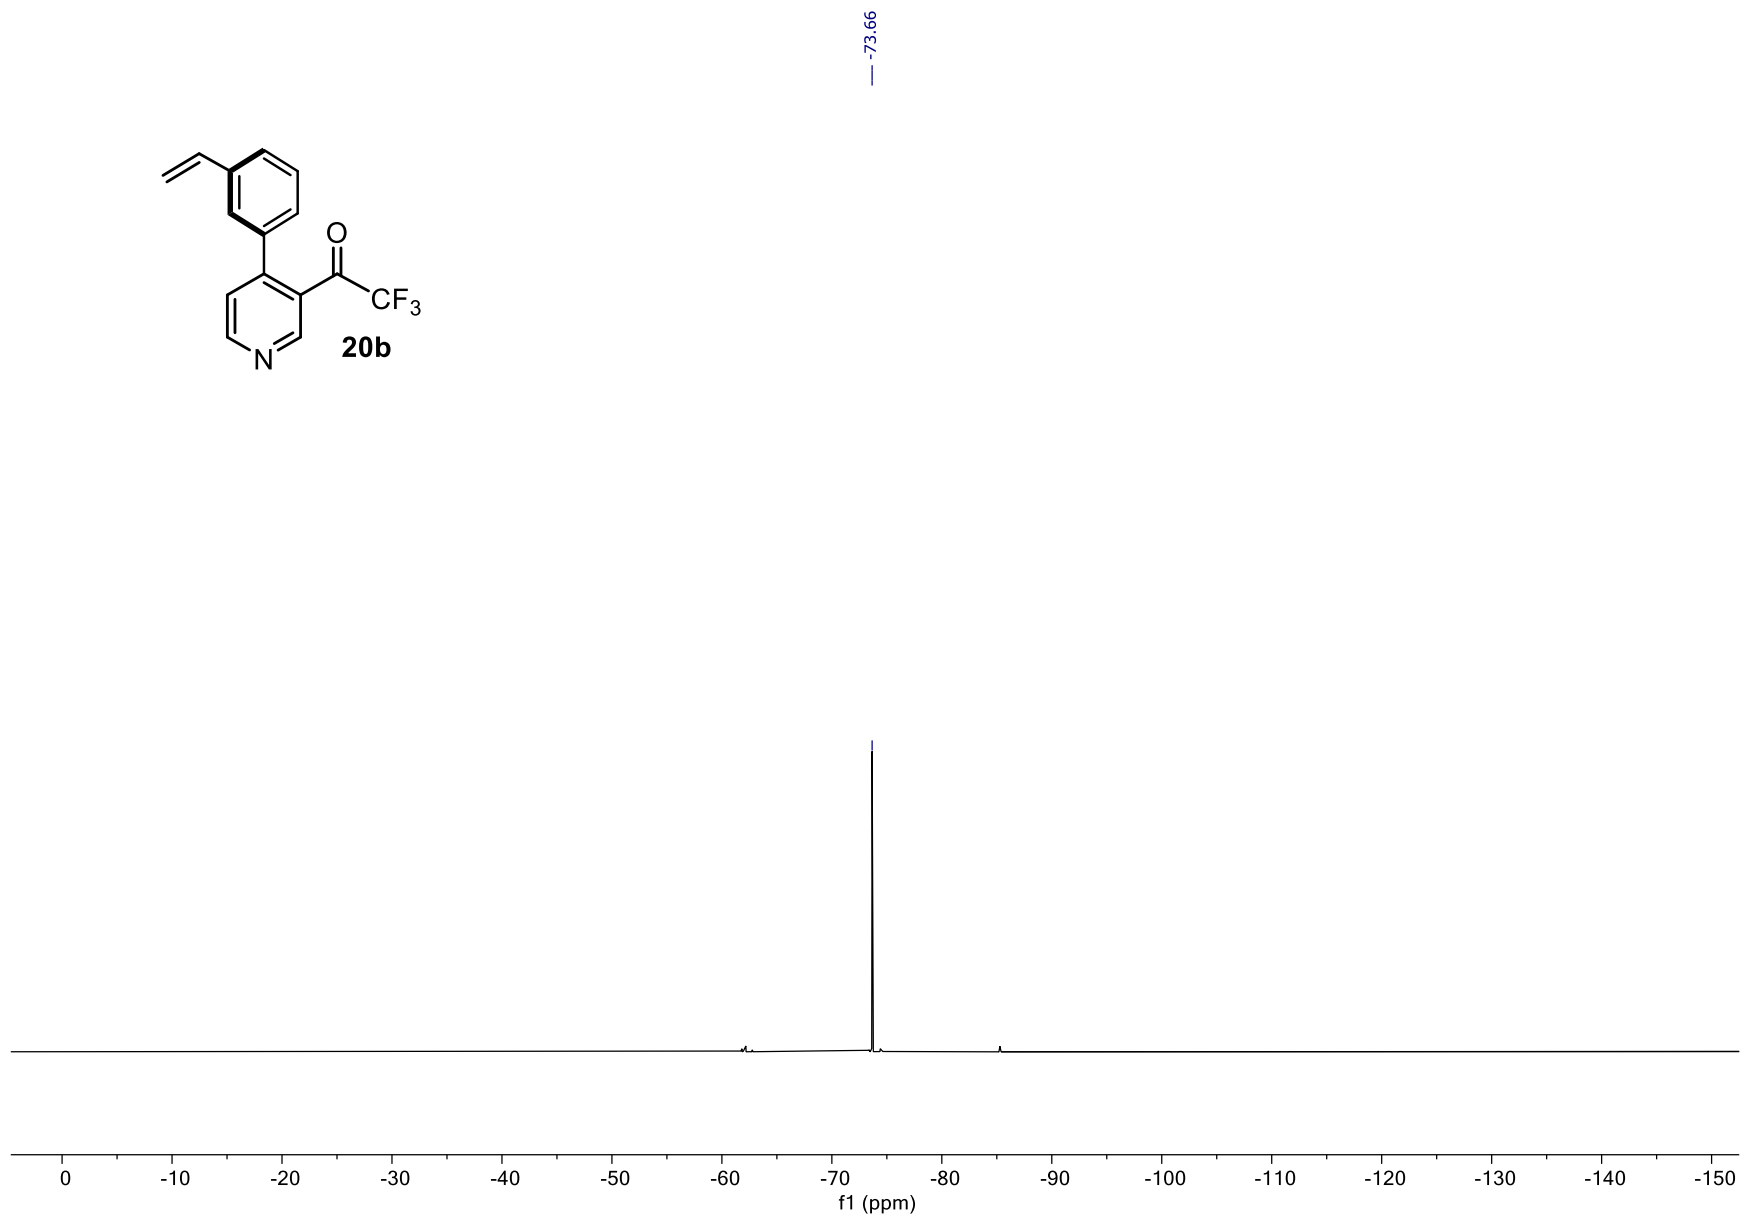

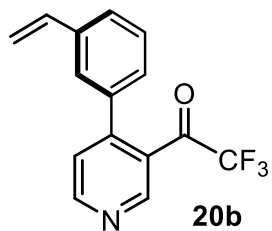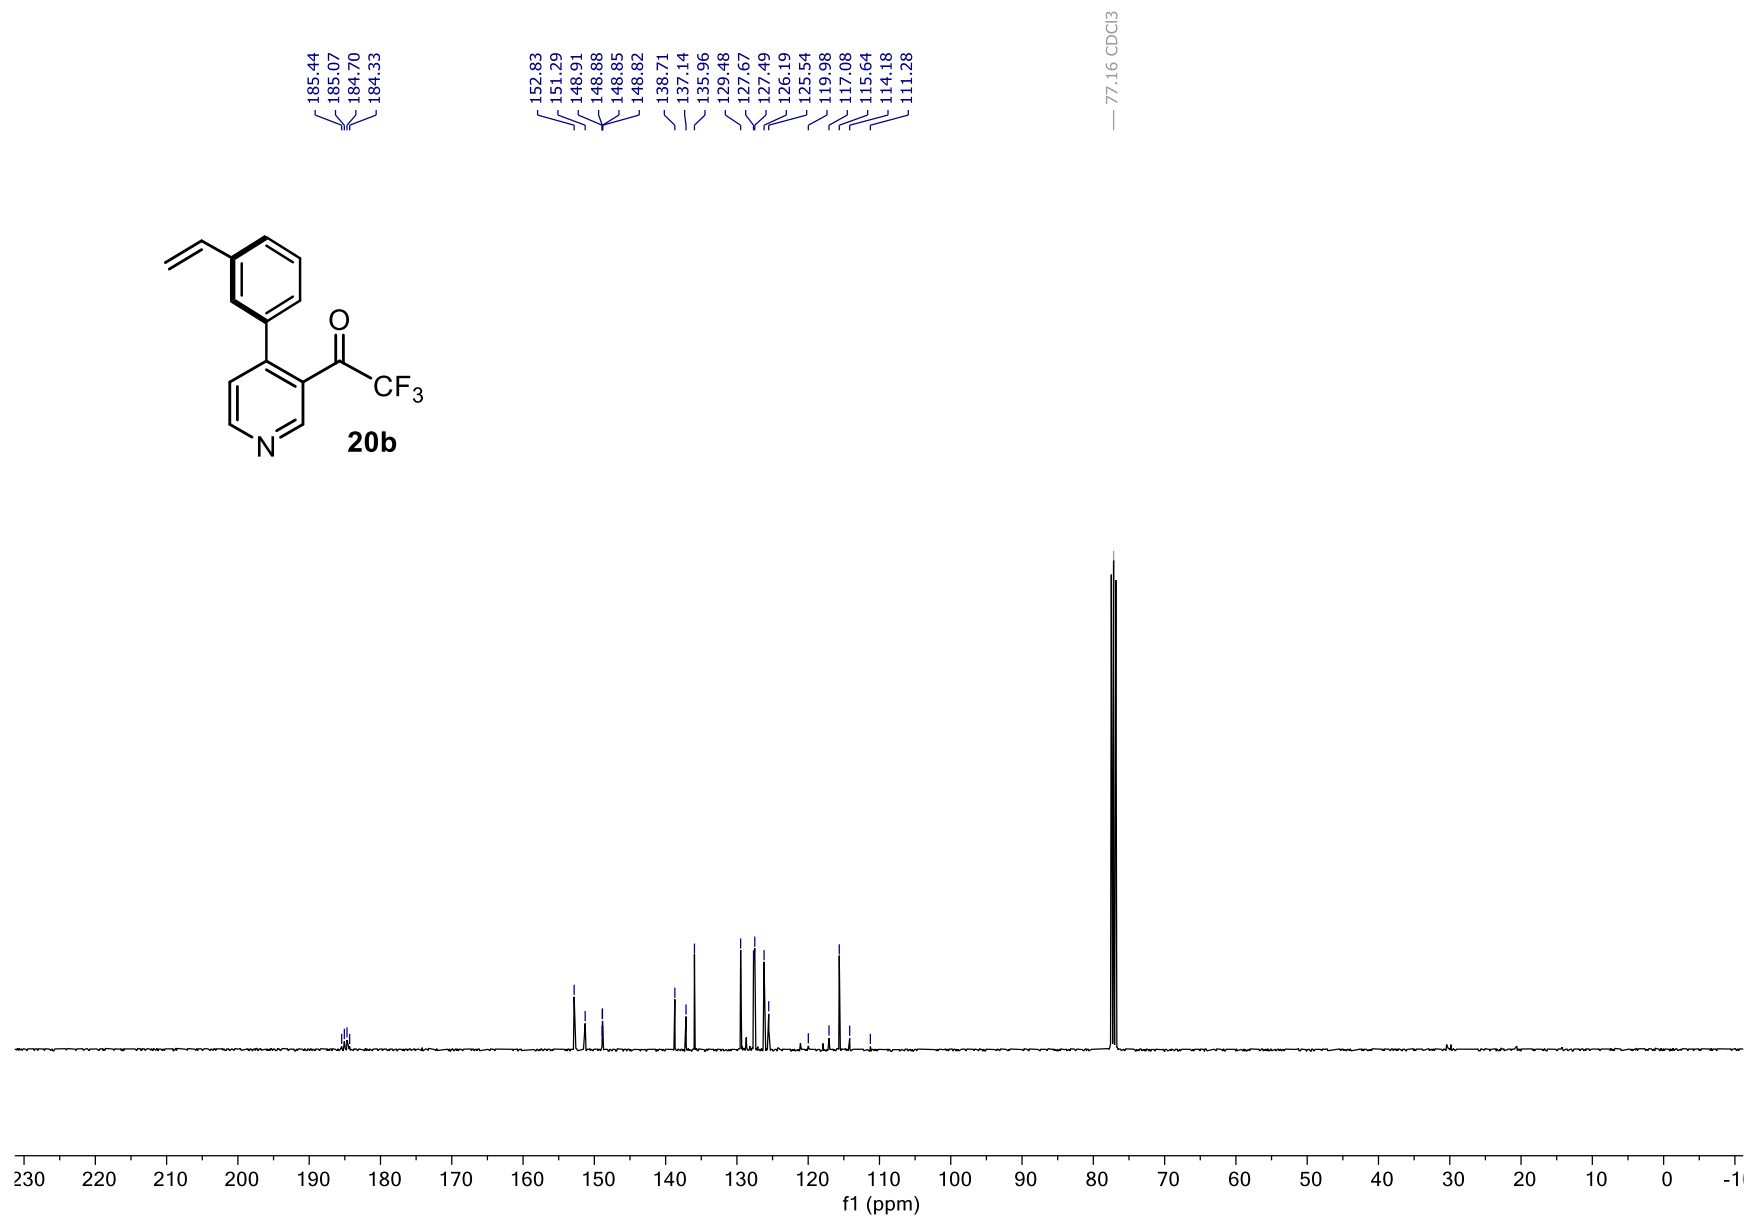

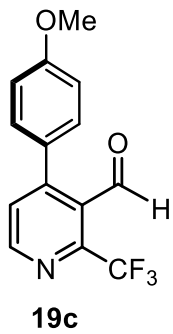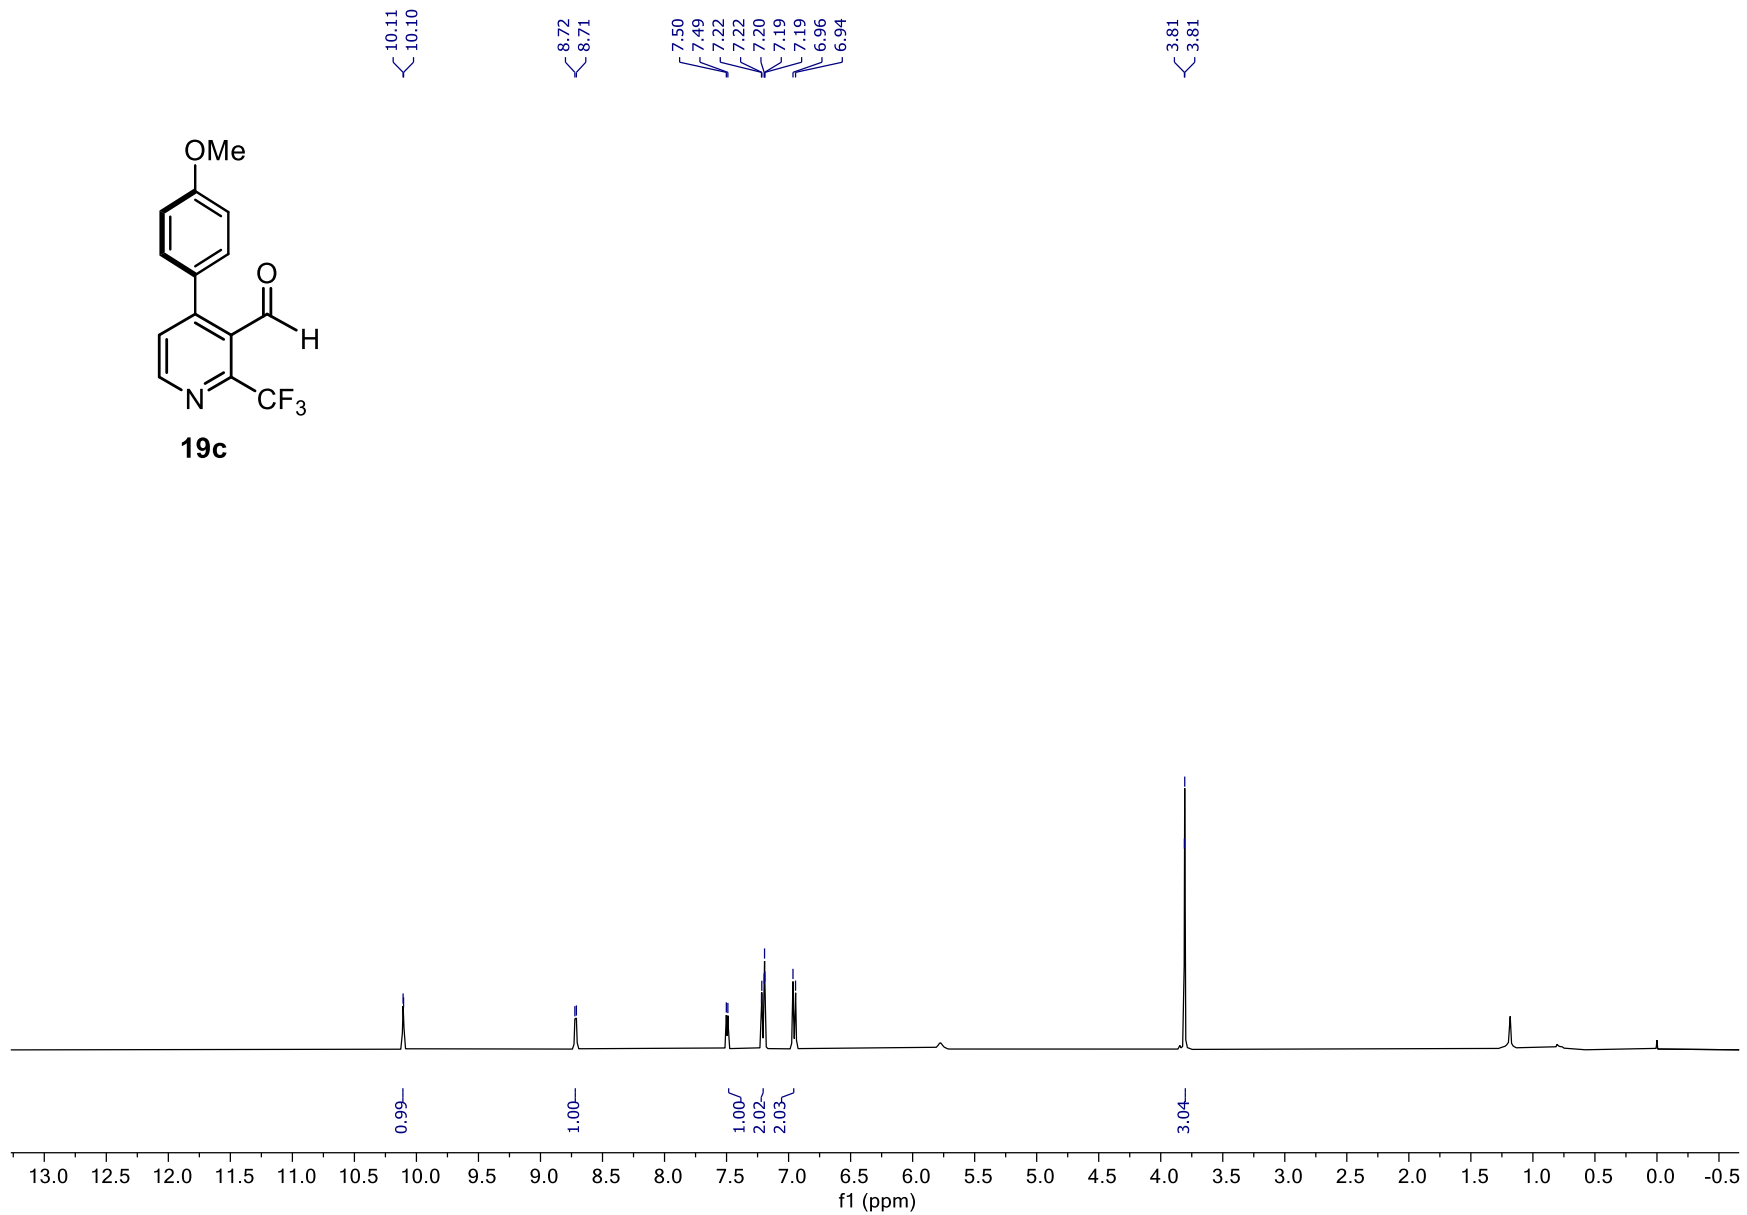

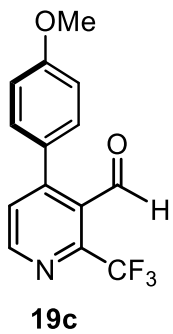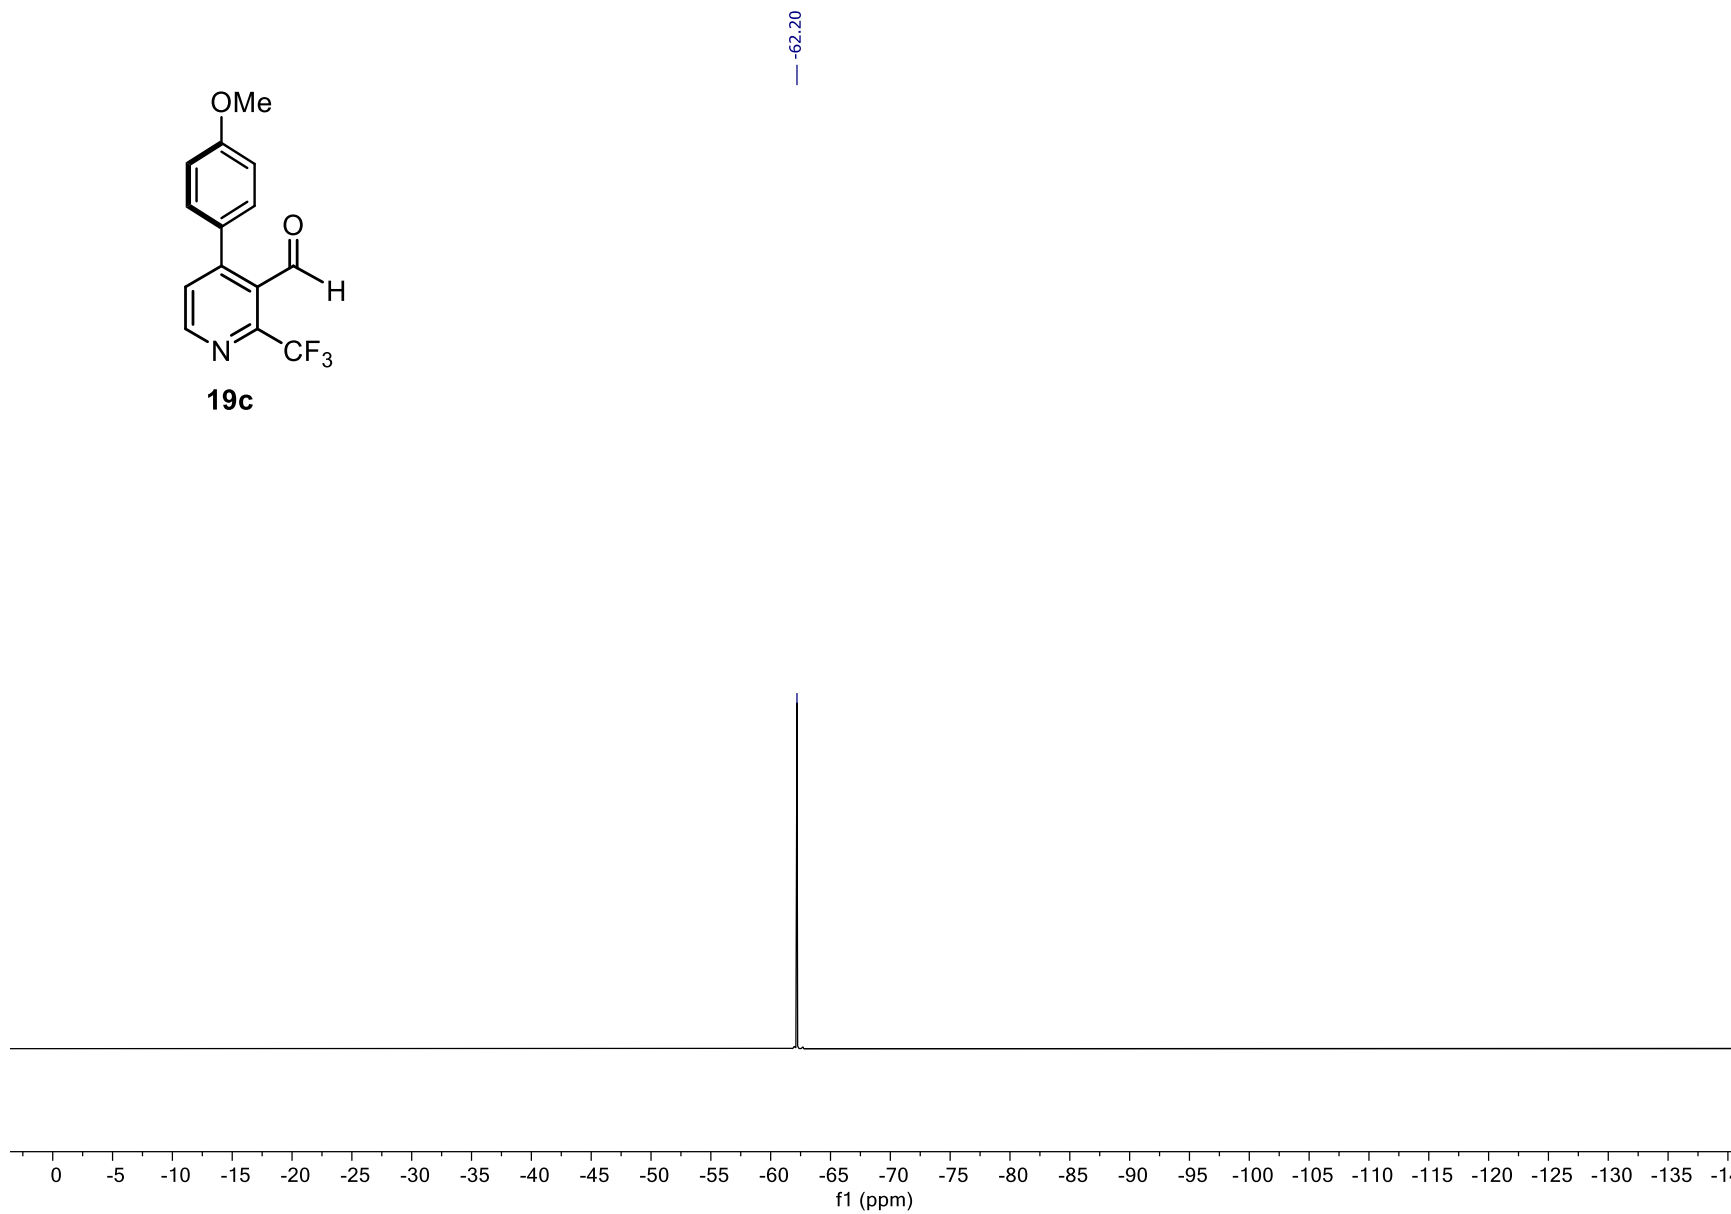

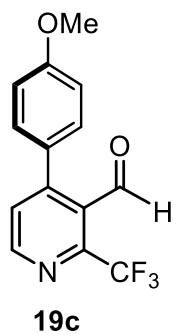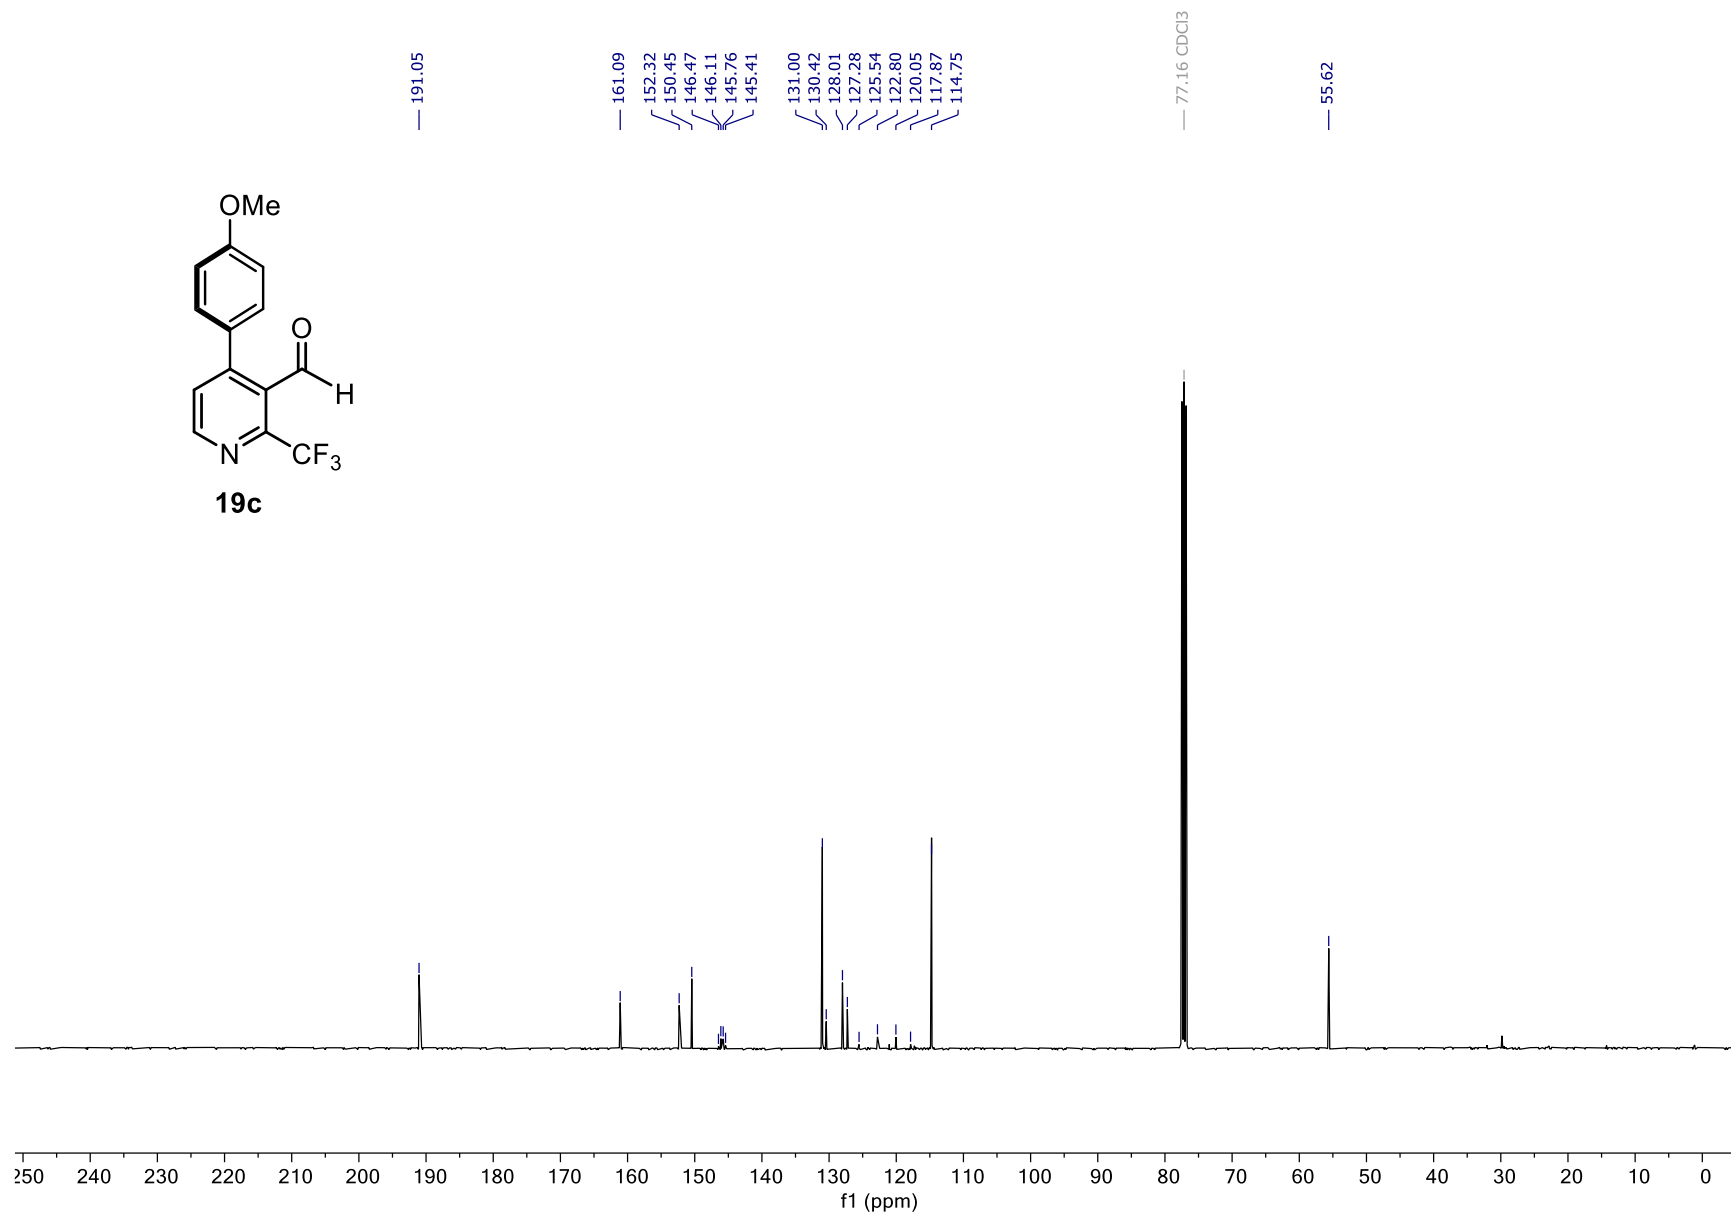

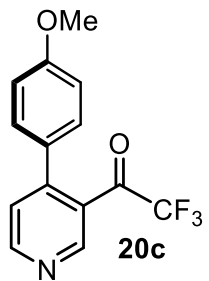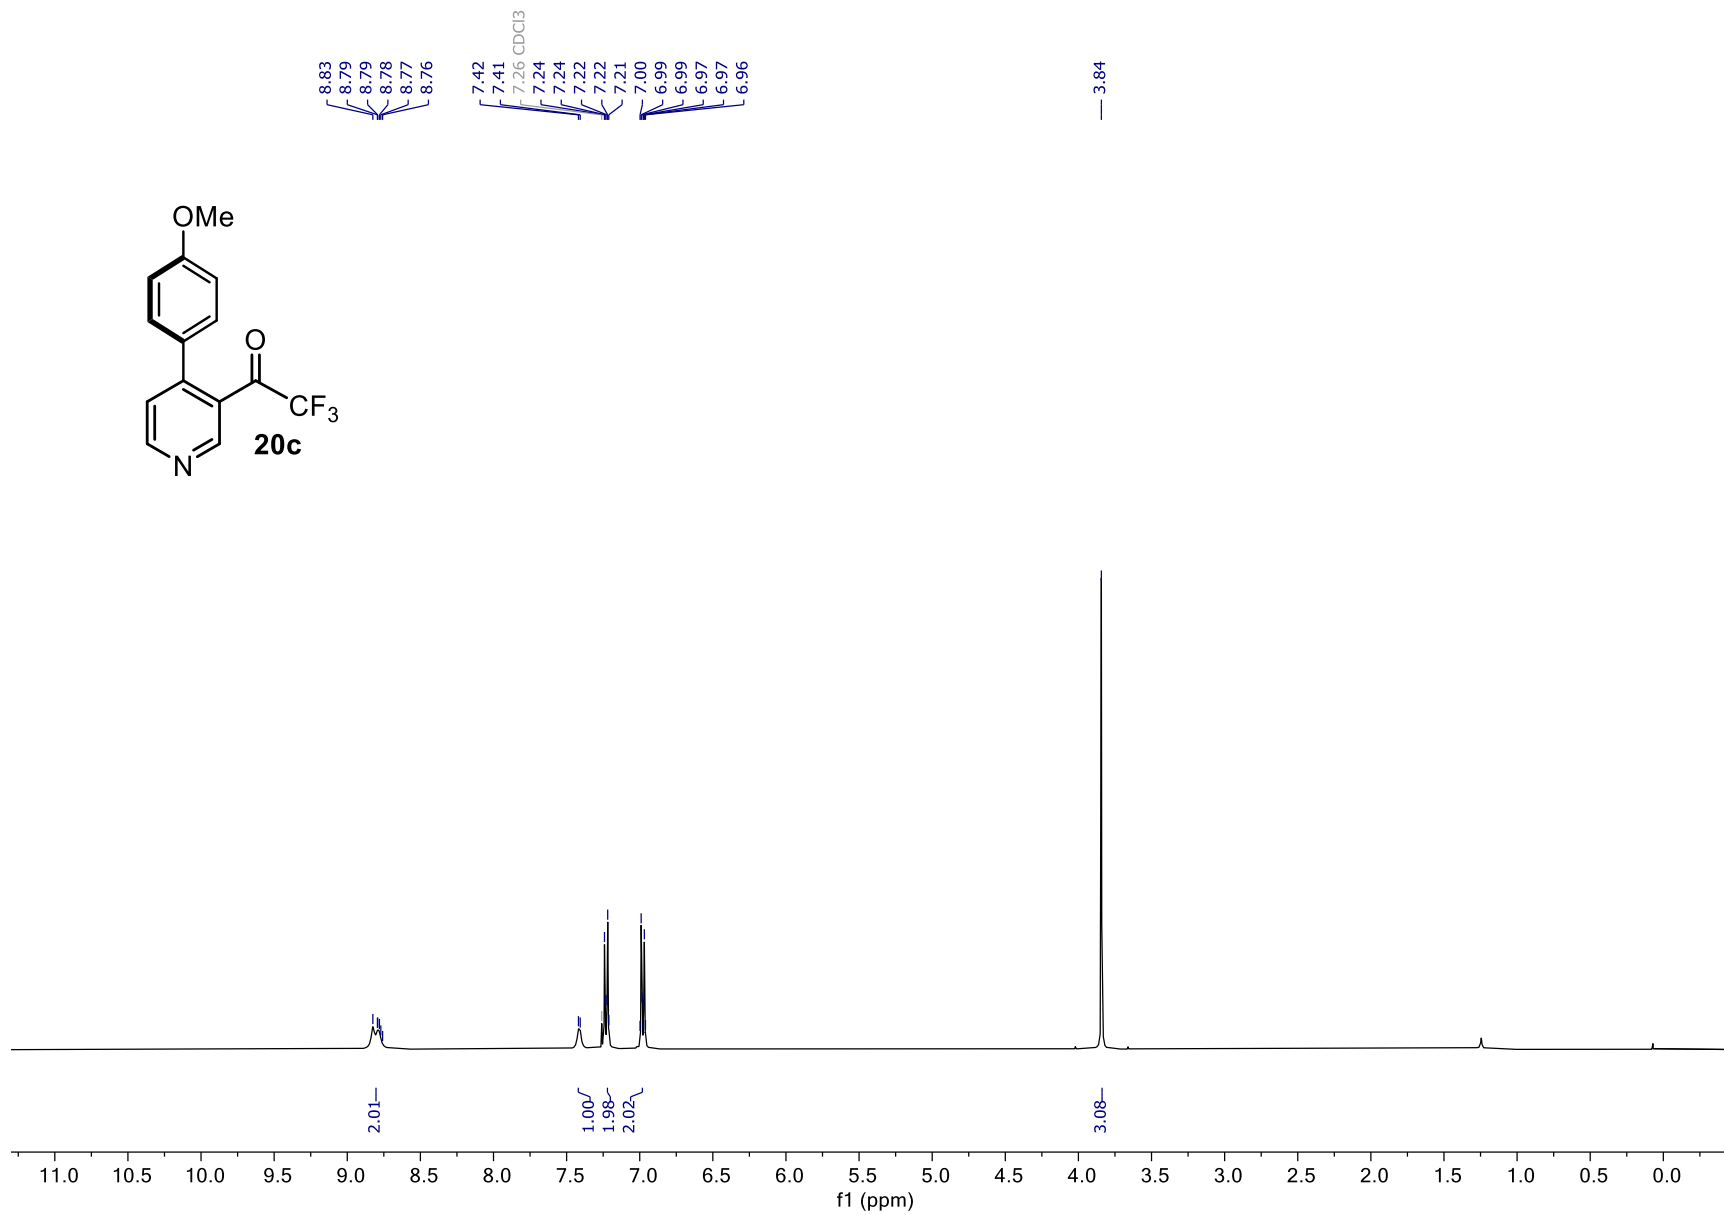

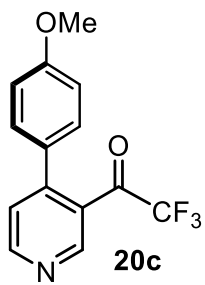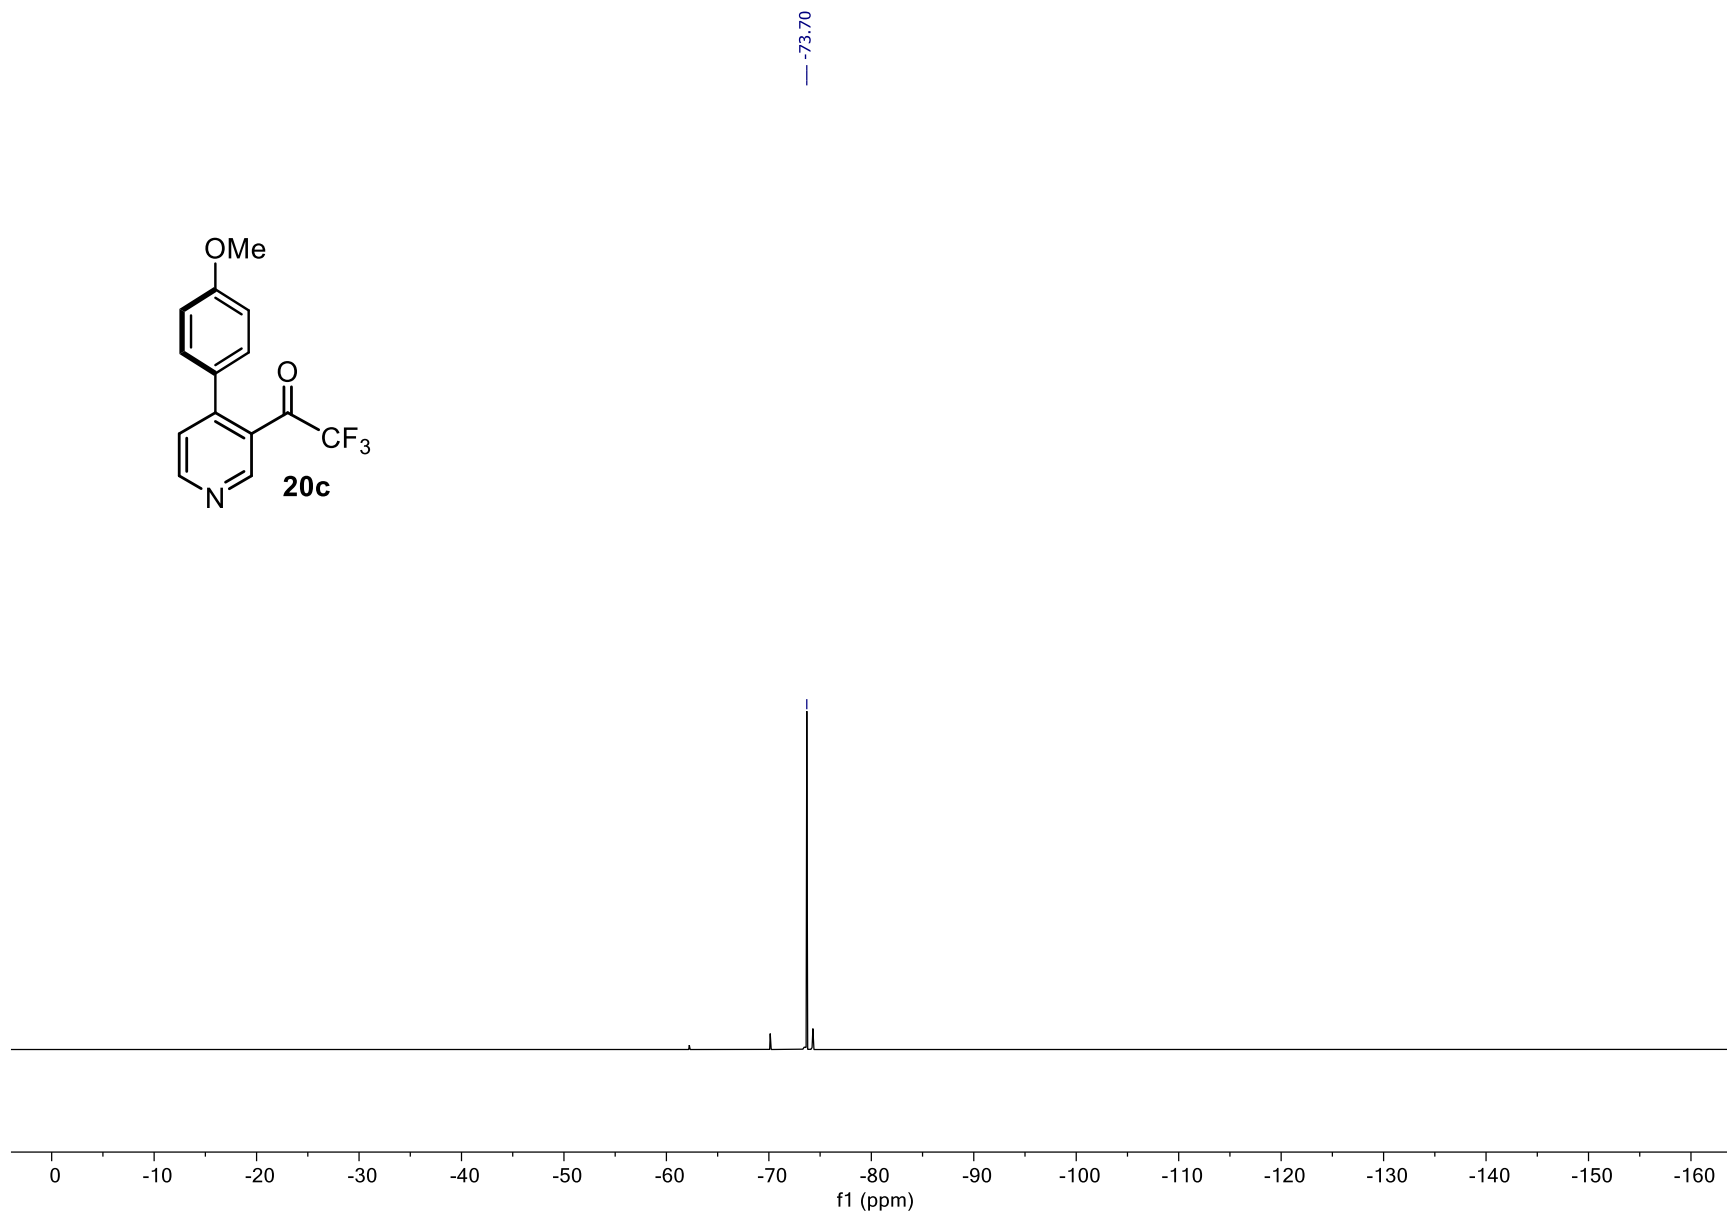

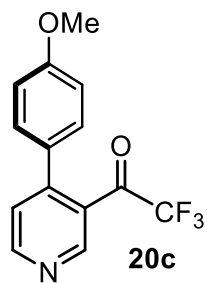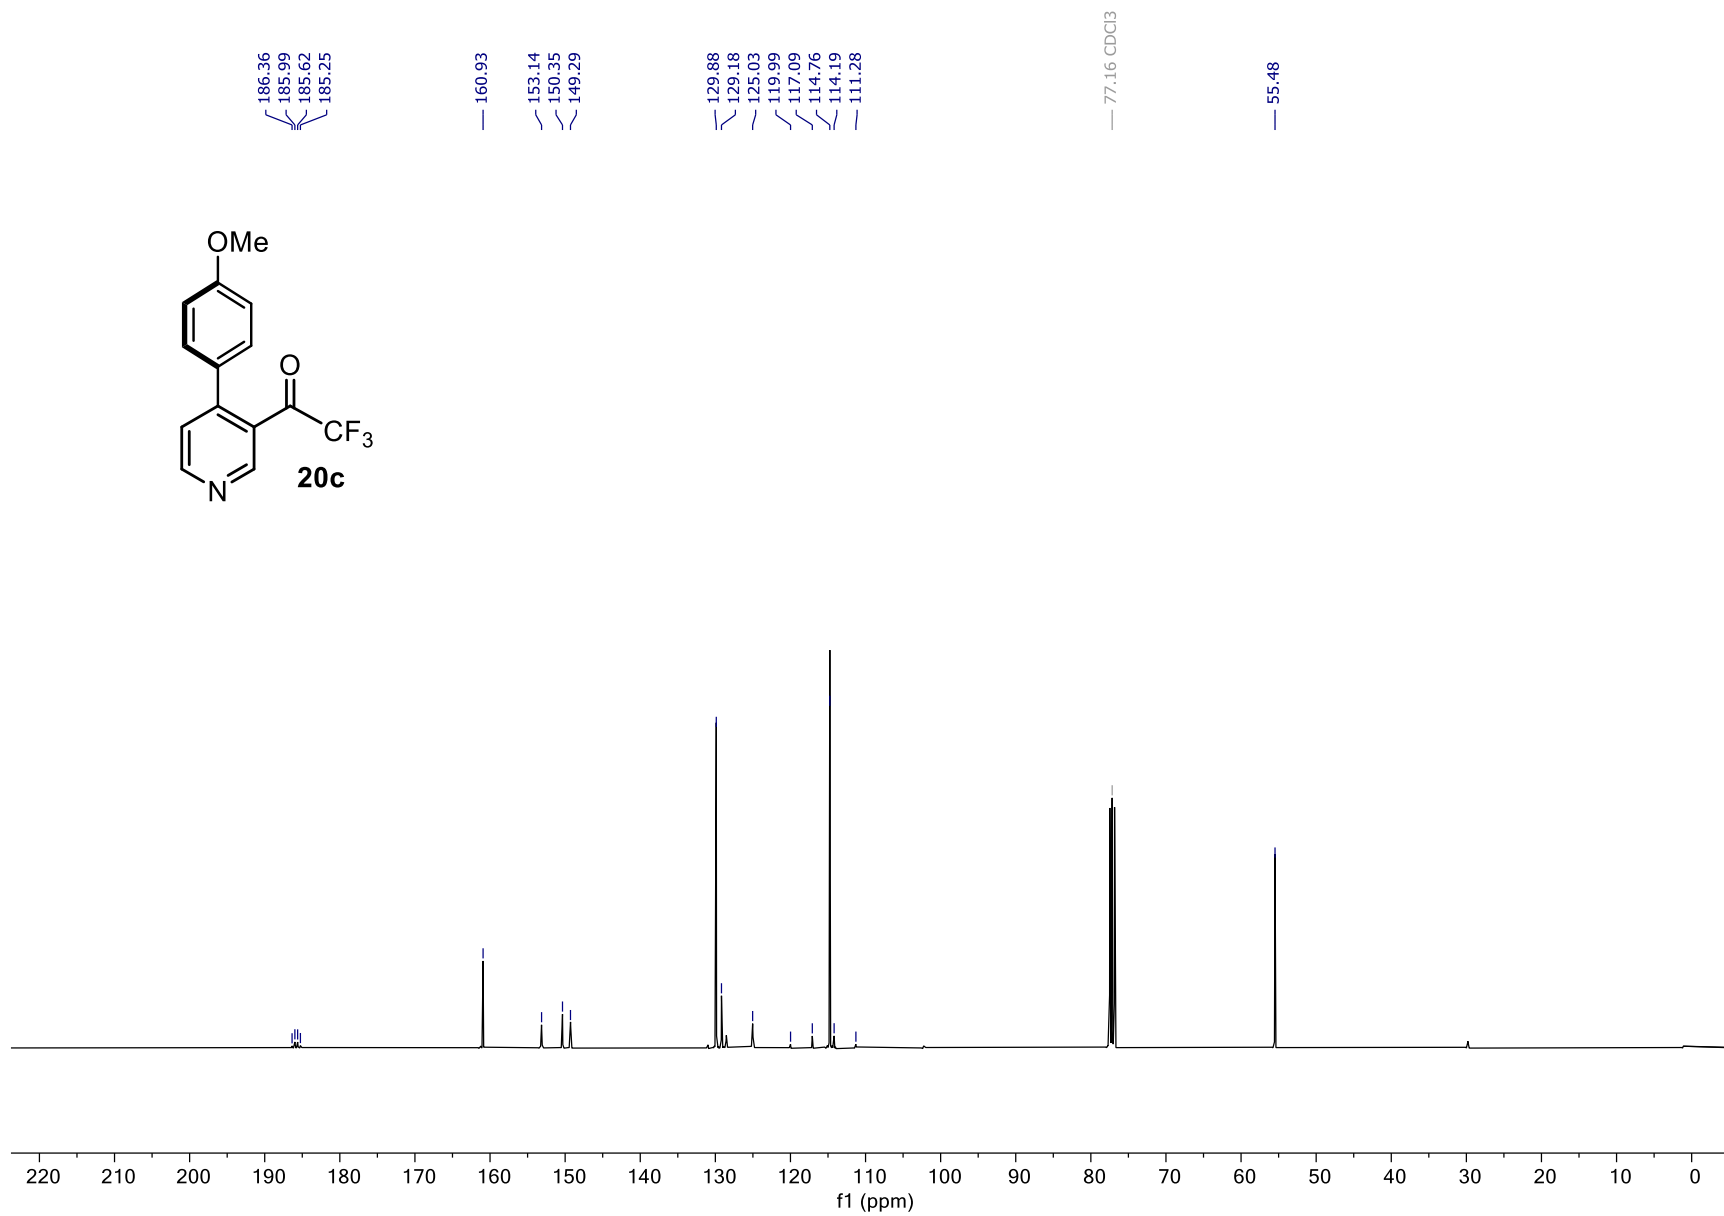

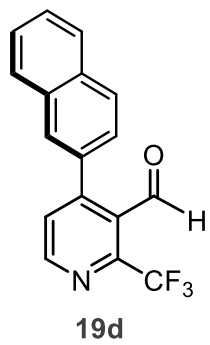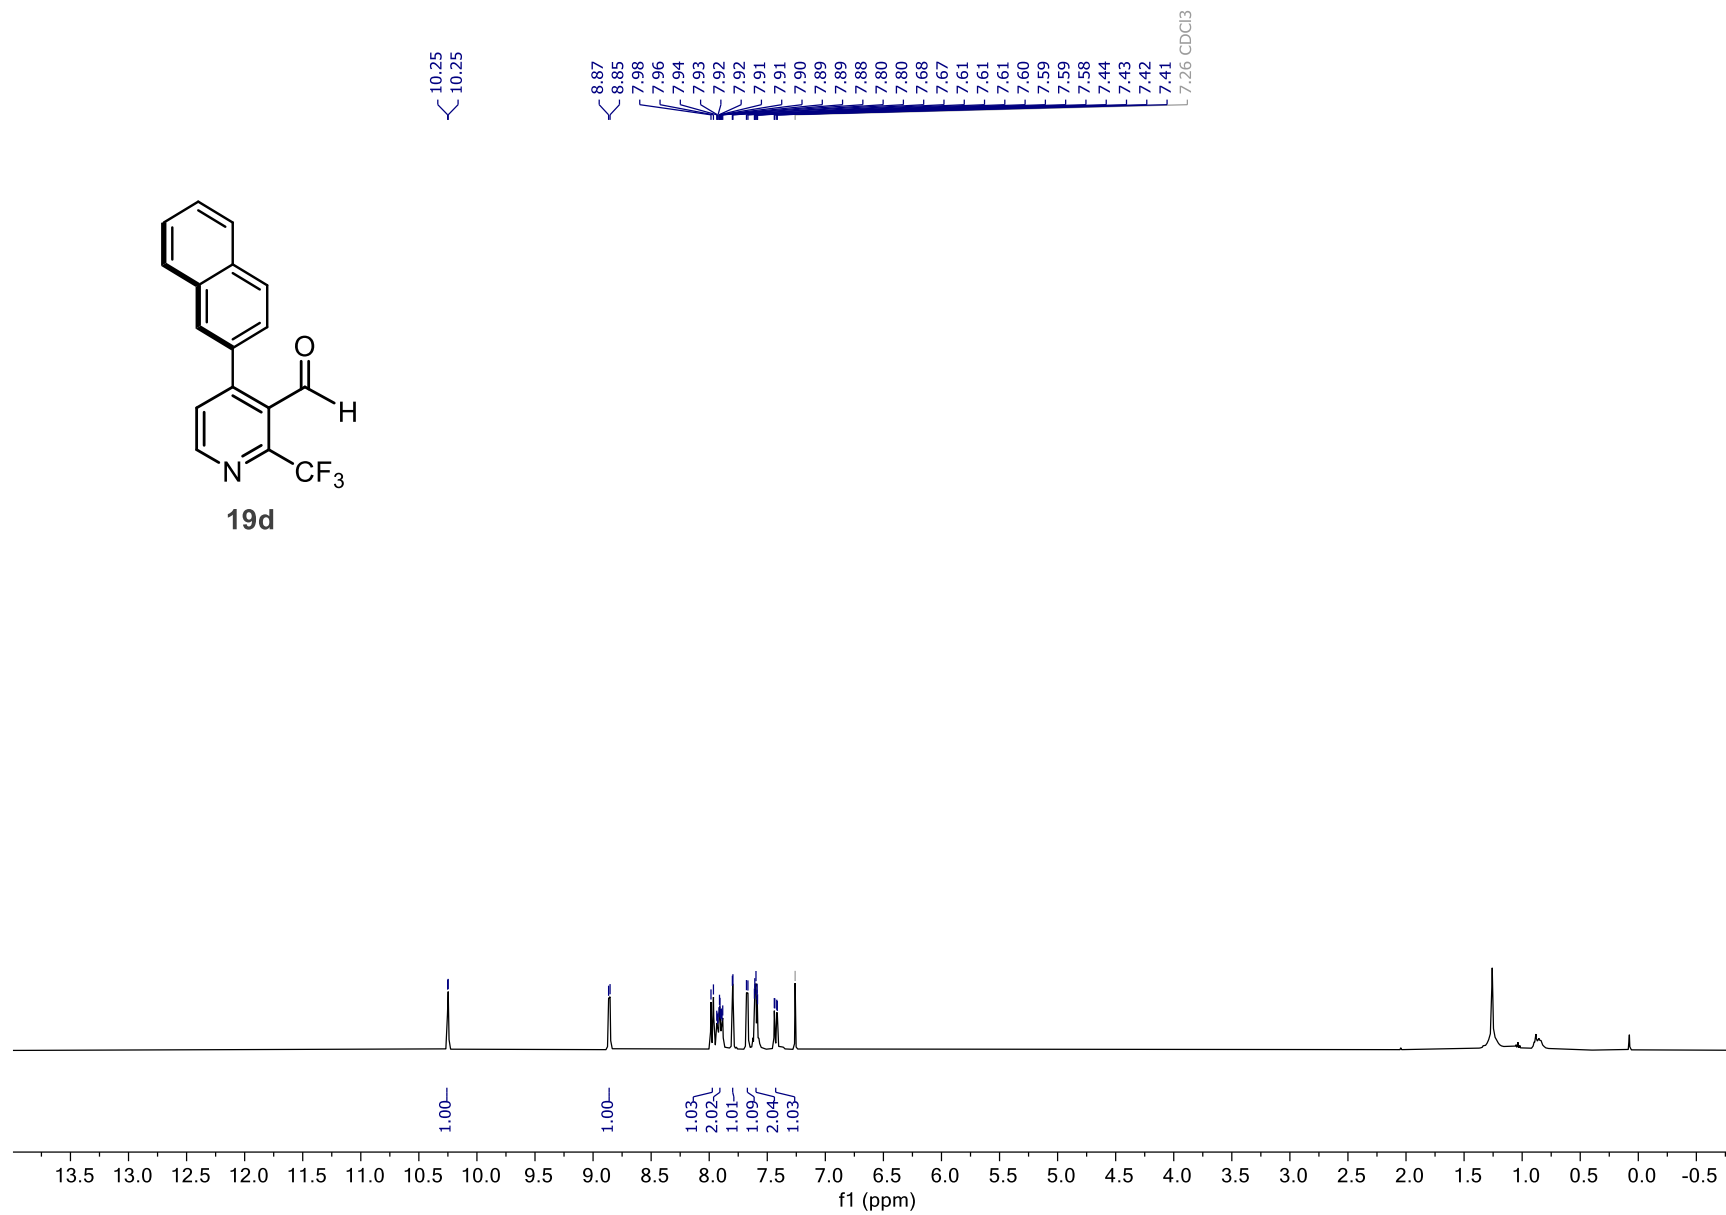



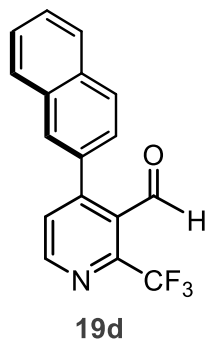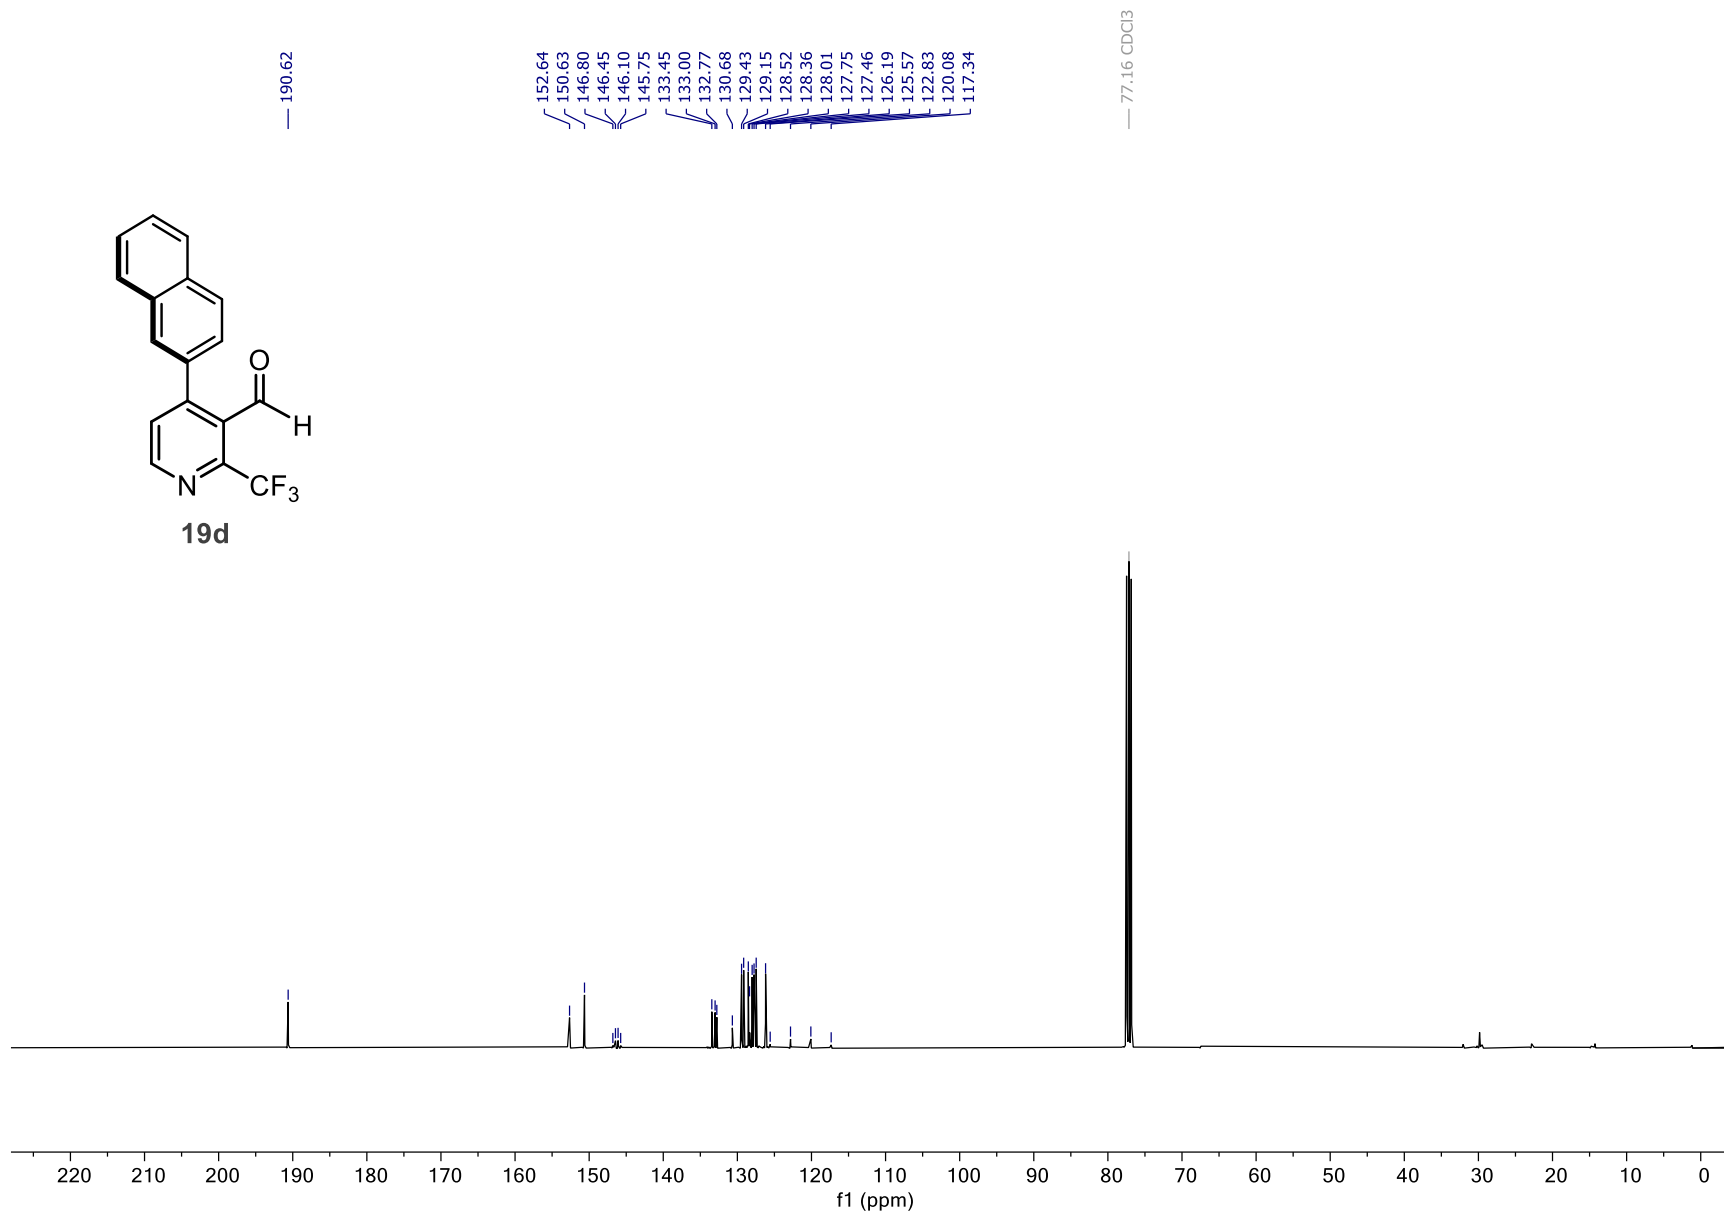

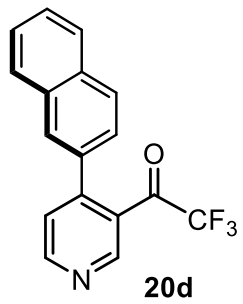

8.95  
8.87  
8.86  
7.95  
7.93  
7.91  
7.90  
7.89  
7.87  
7.86  
7.76  
7.59  
7.59  
7.57  
7.56  
7.55  
7.54  
7.40  
7.40  
7.38  
7.38  
7.26 CDCl<sub>3</sub>

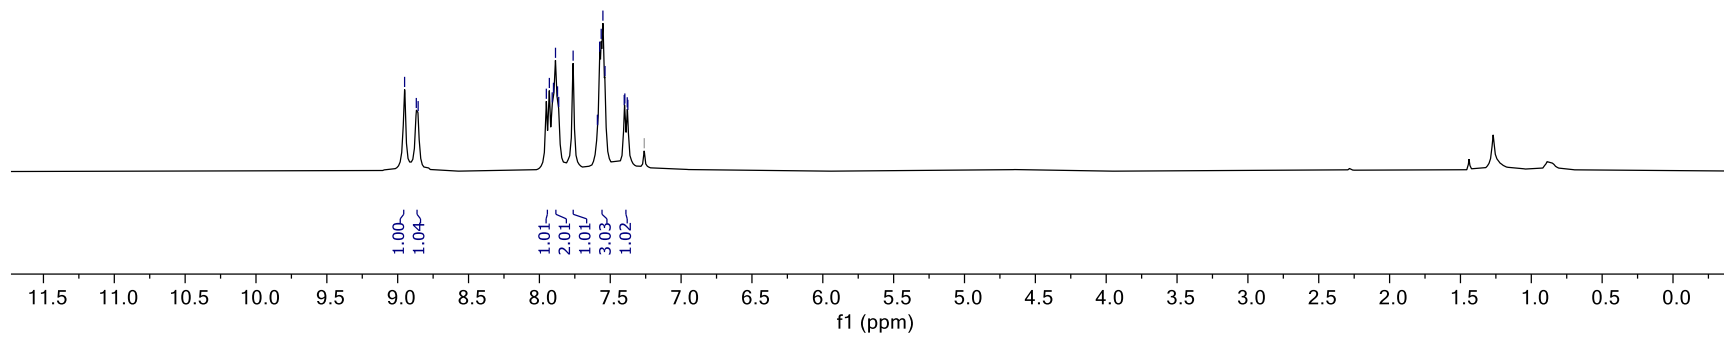

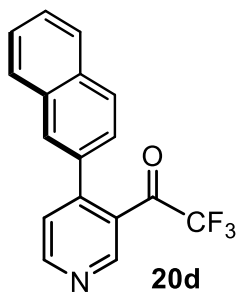

— 73.45

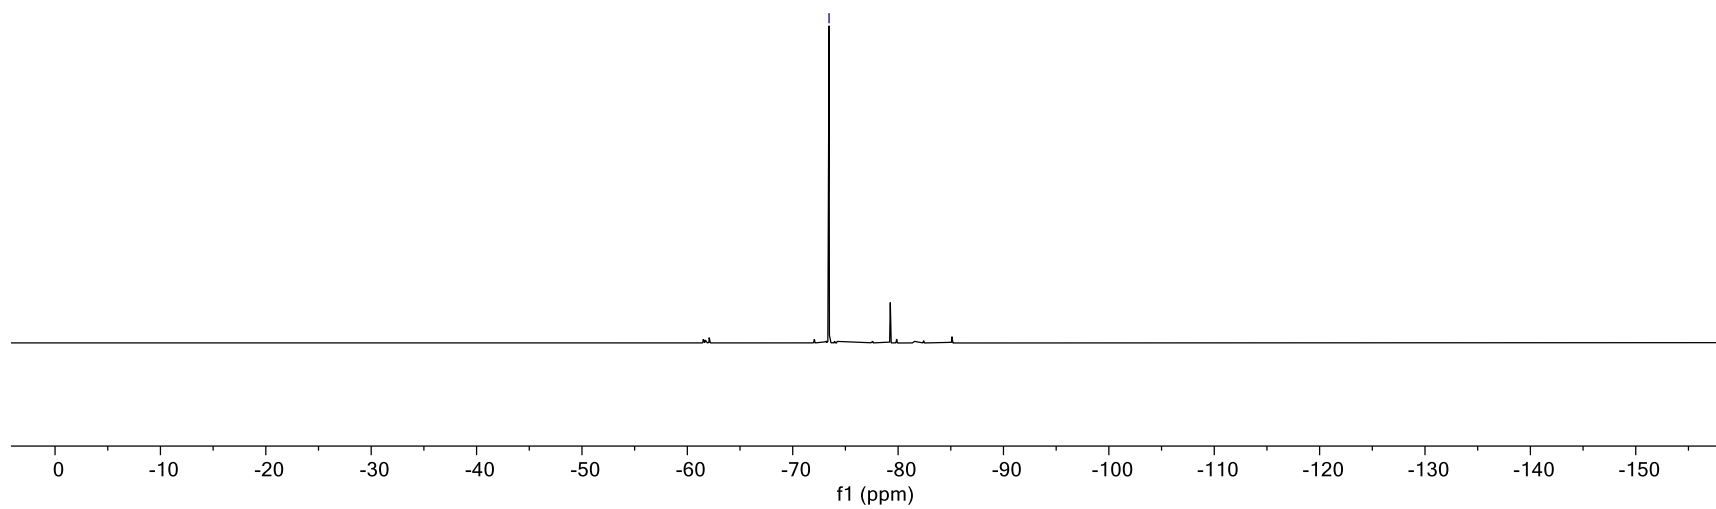

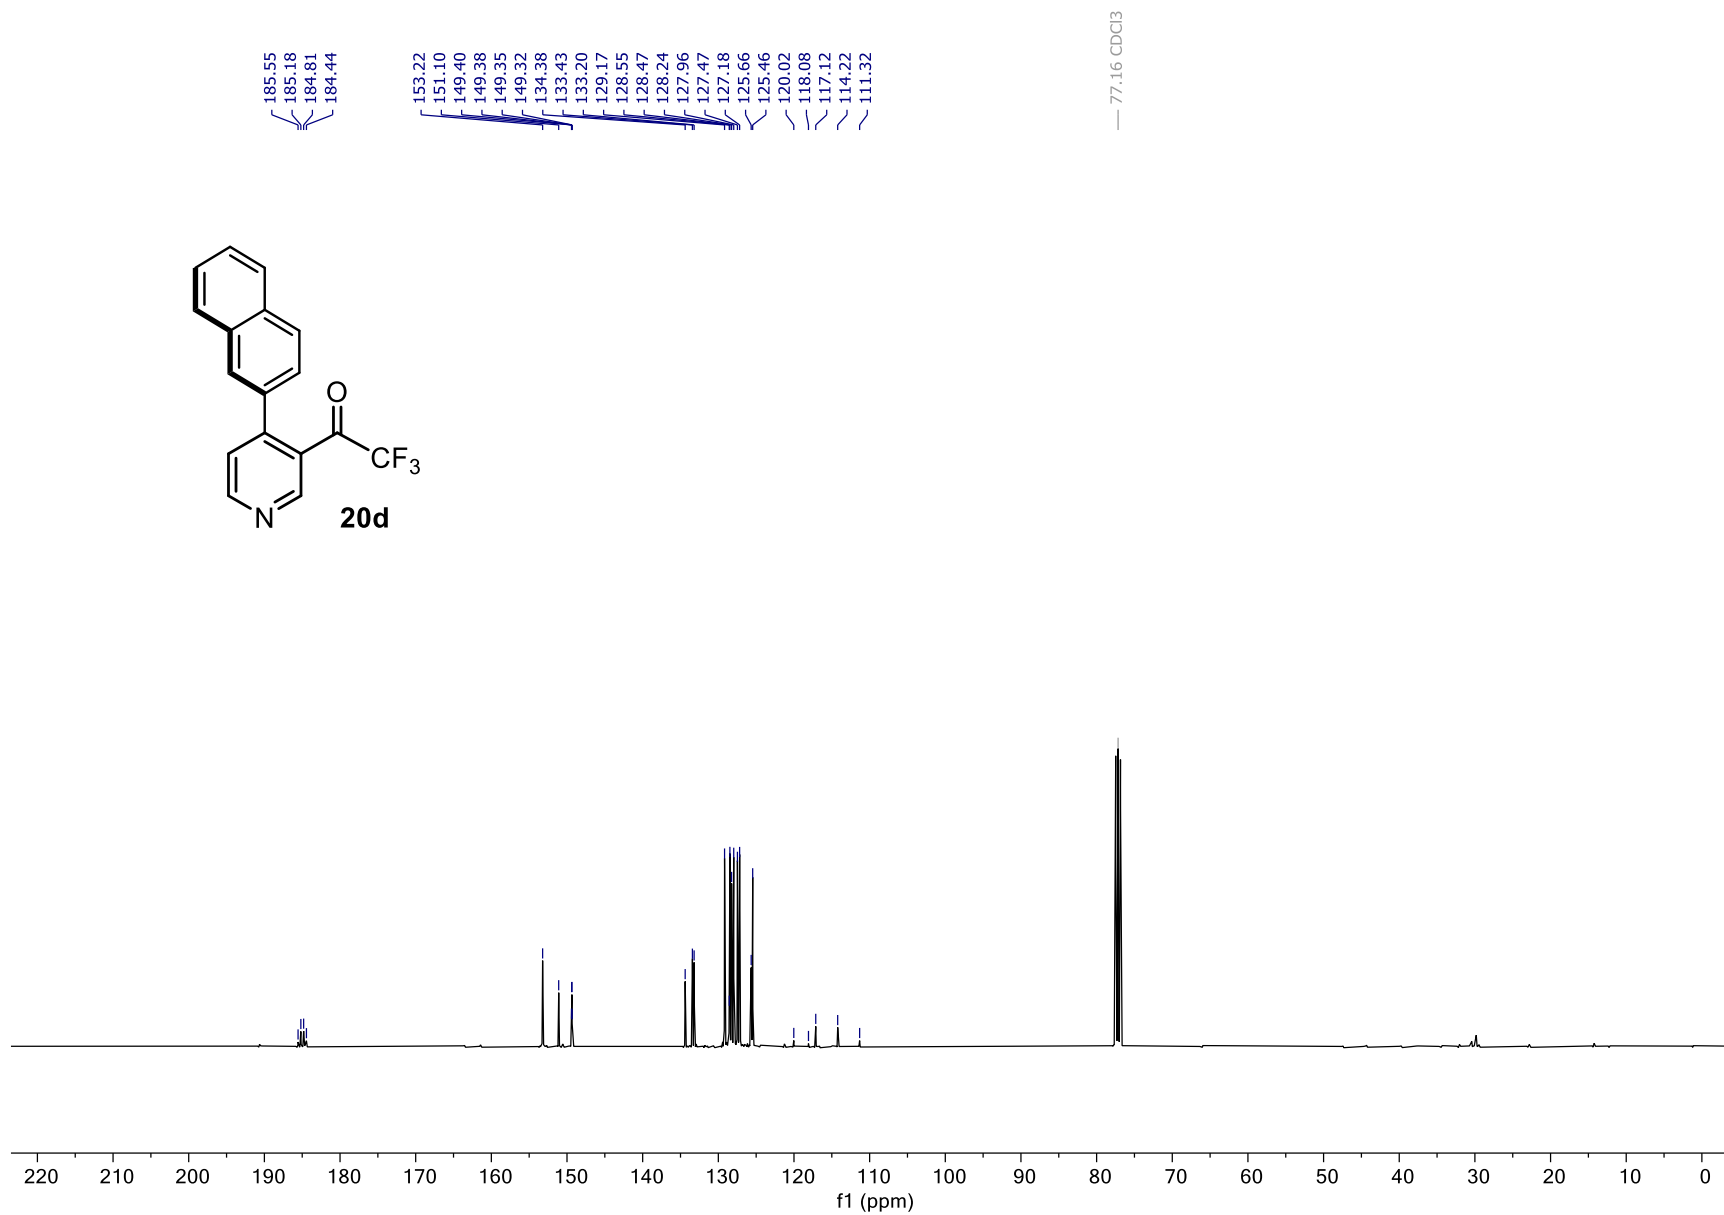

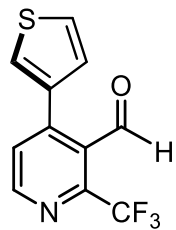

19e

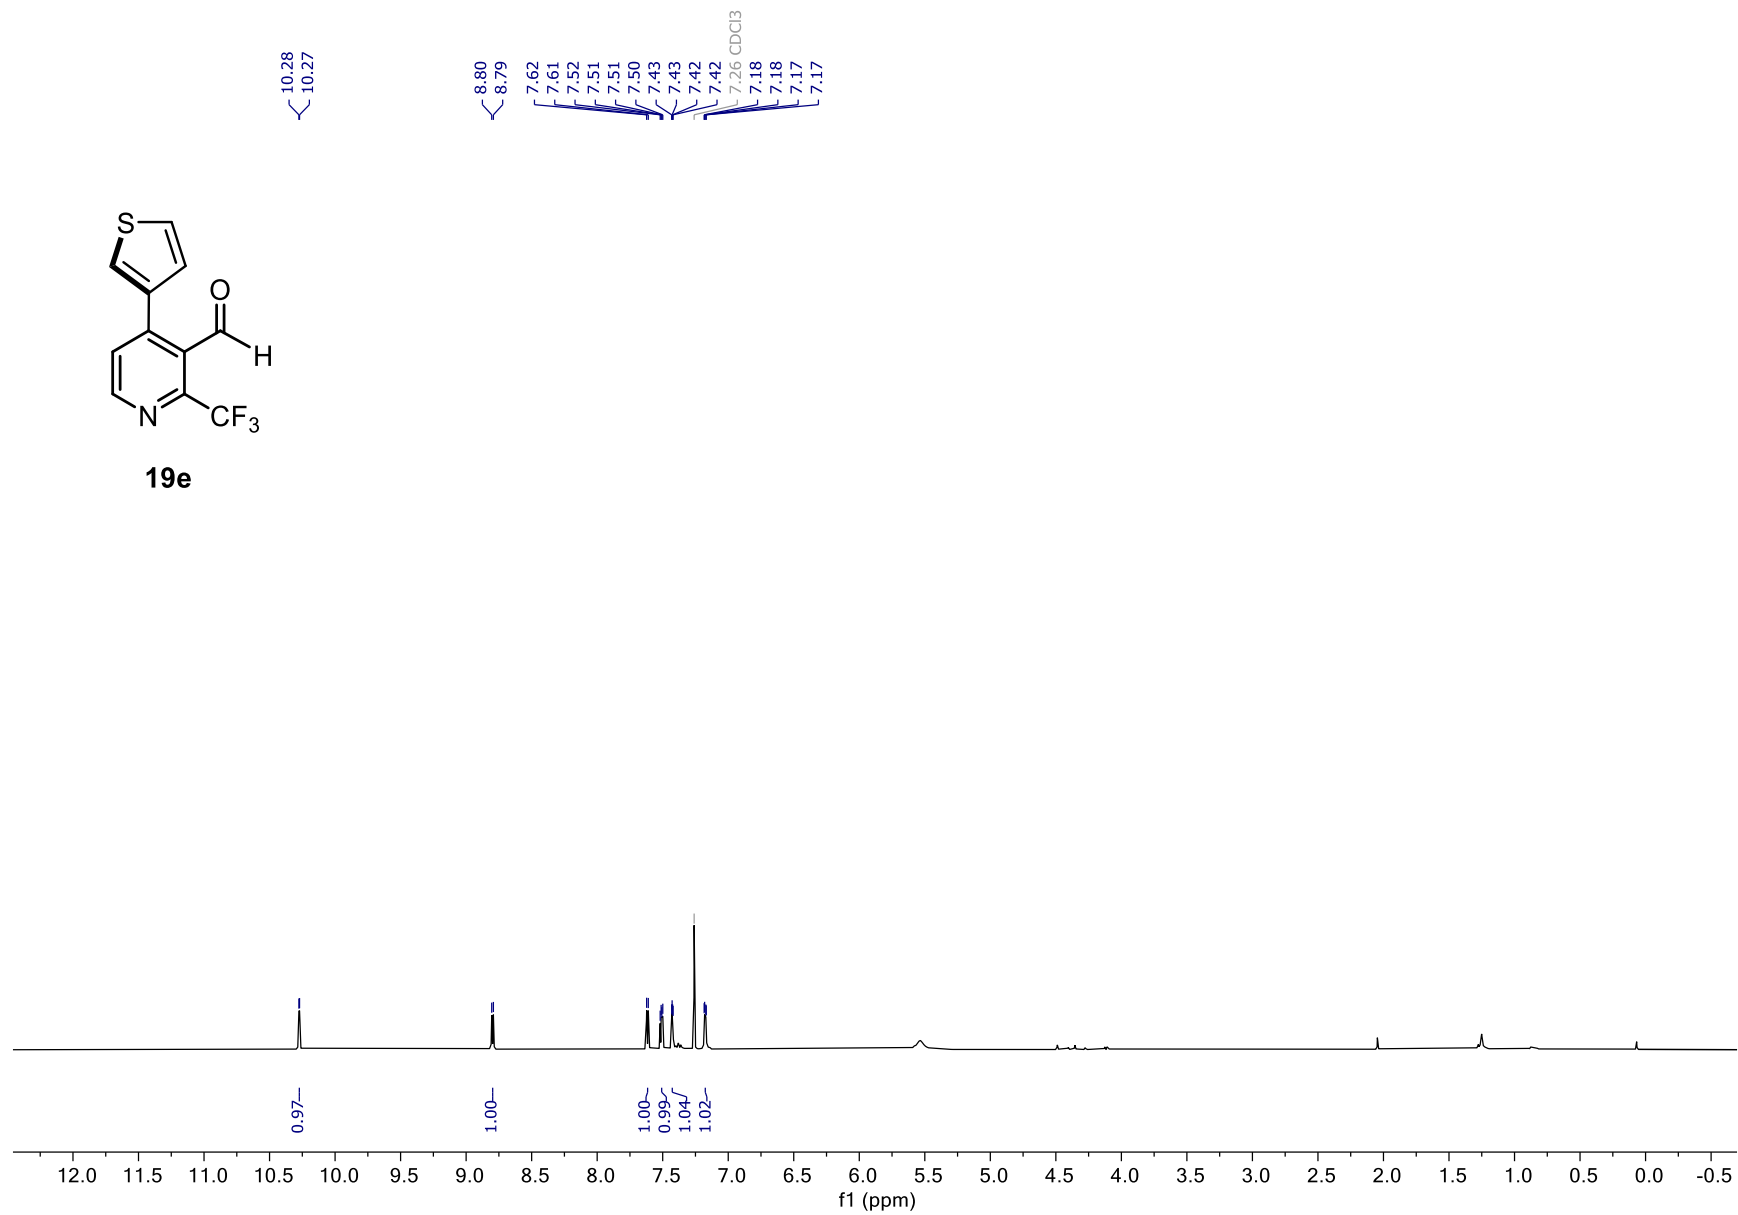

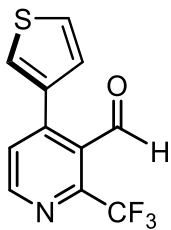

**19e**

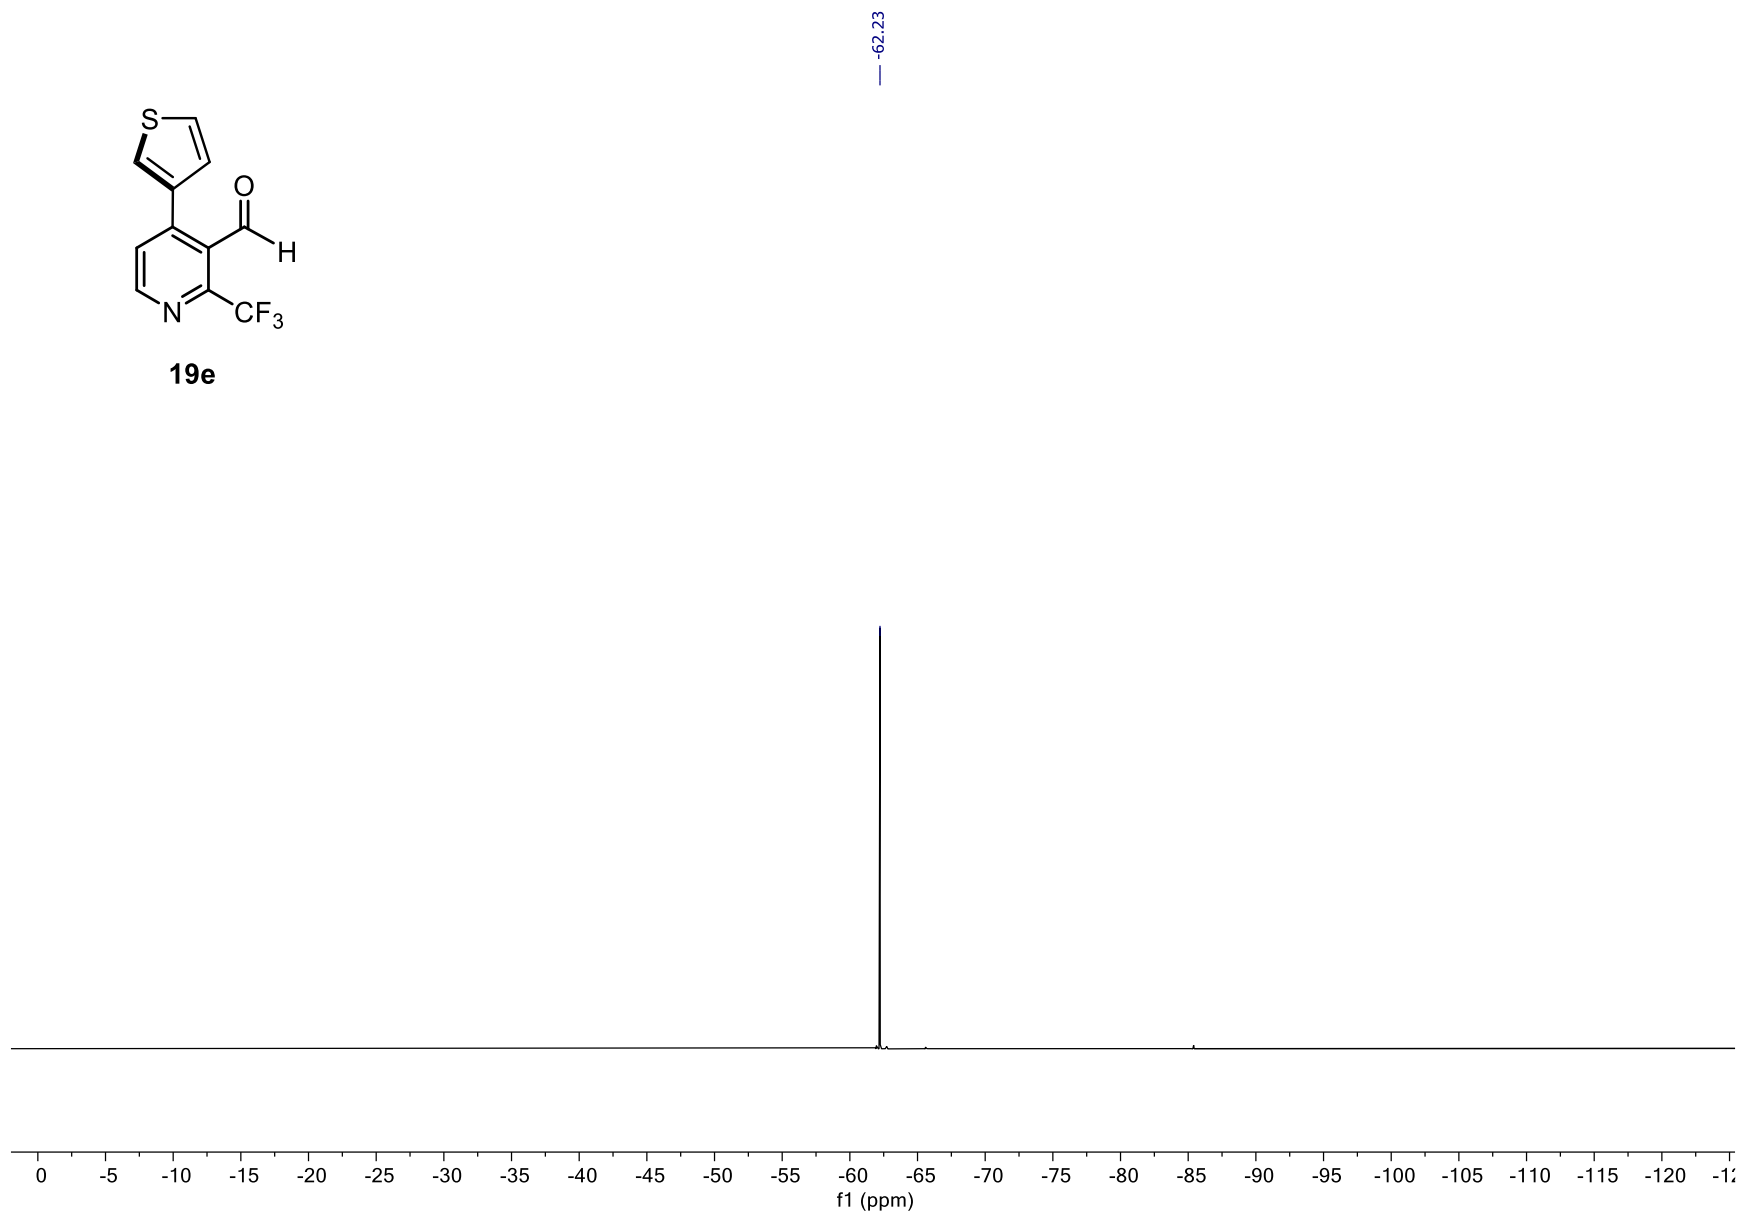

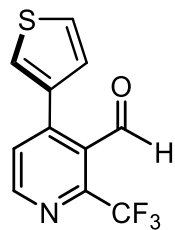

**19e**

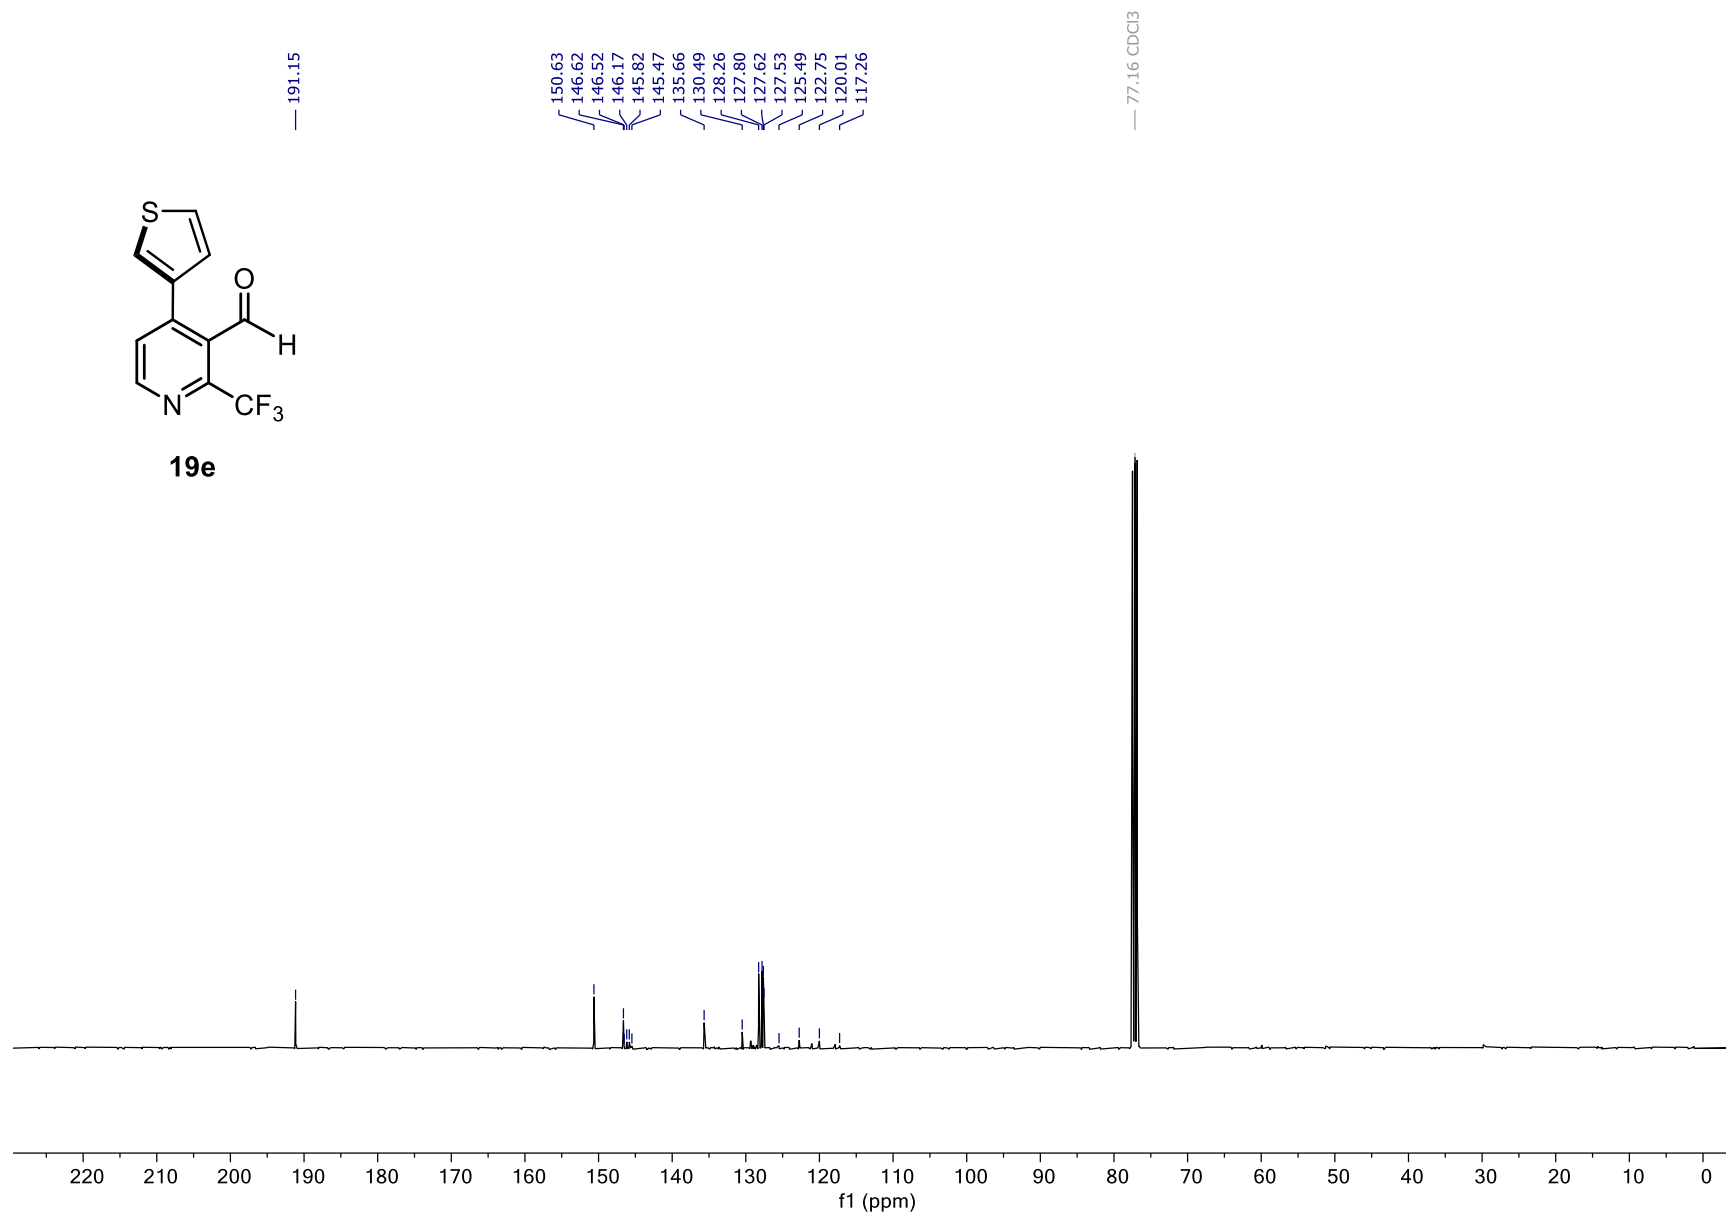

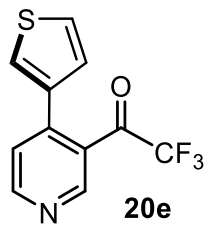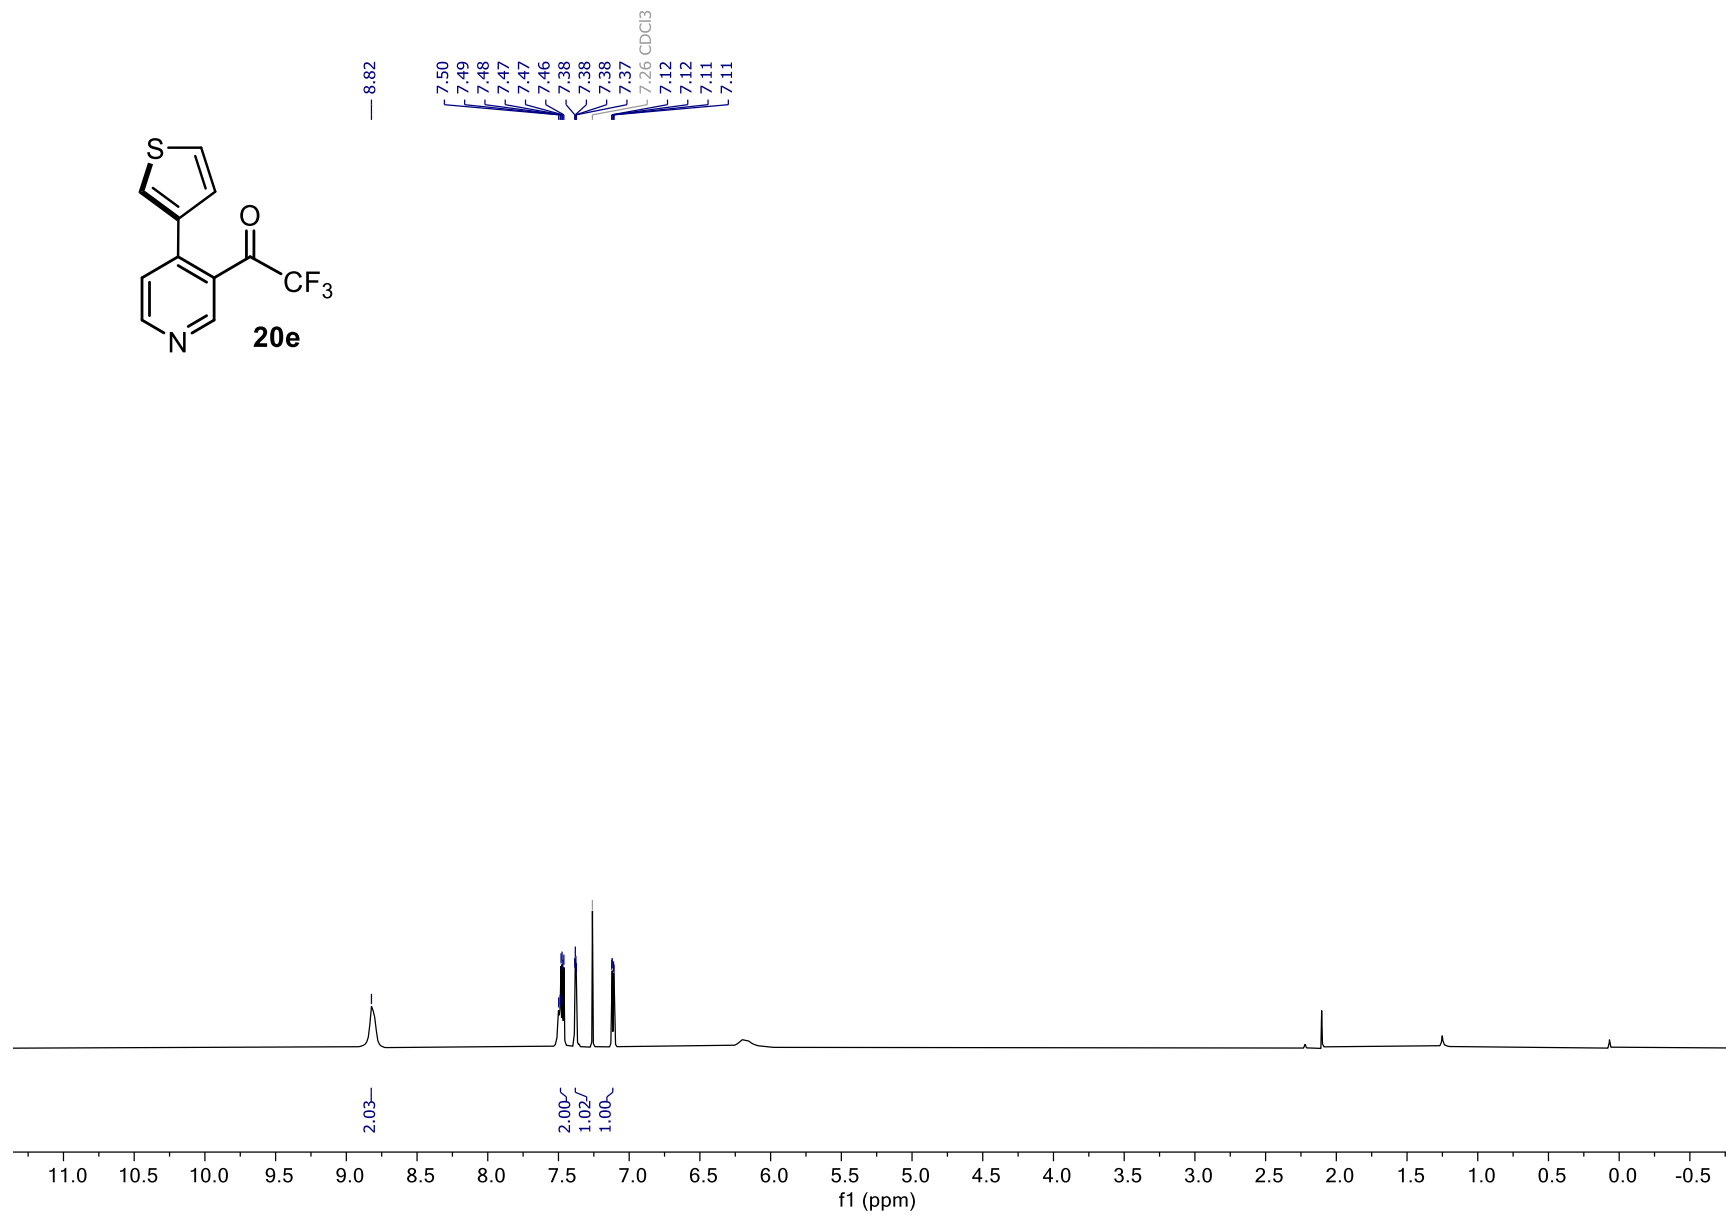

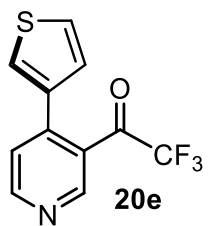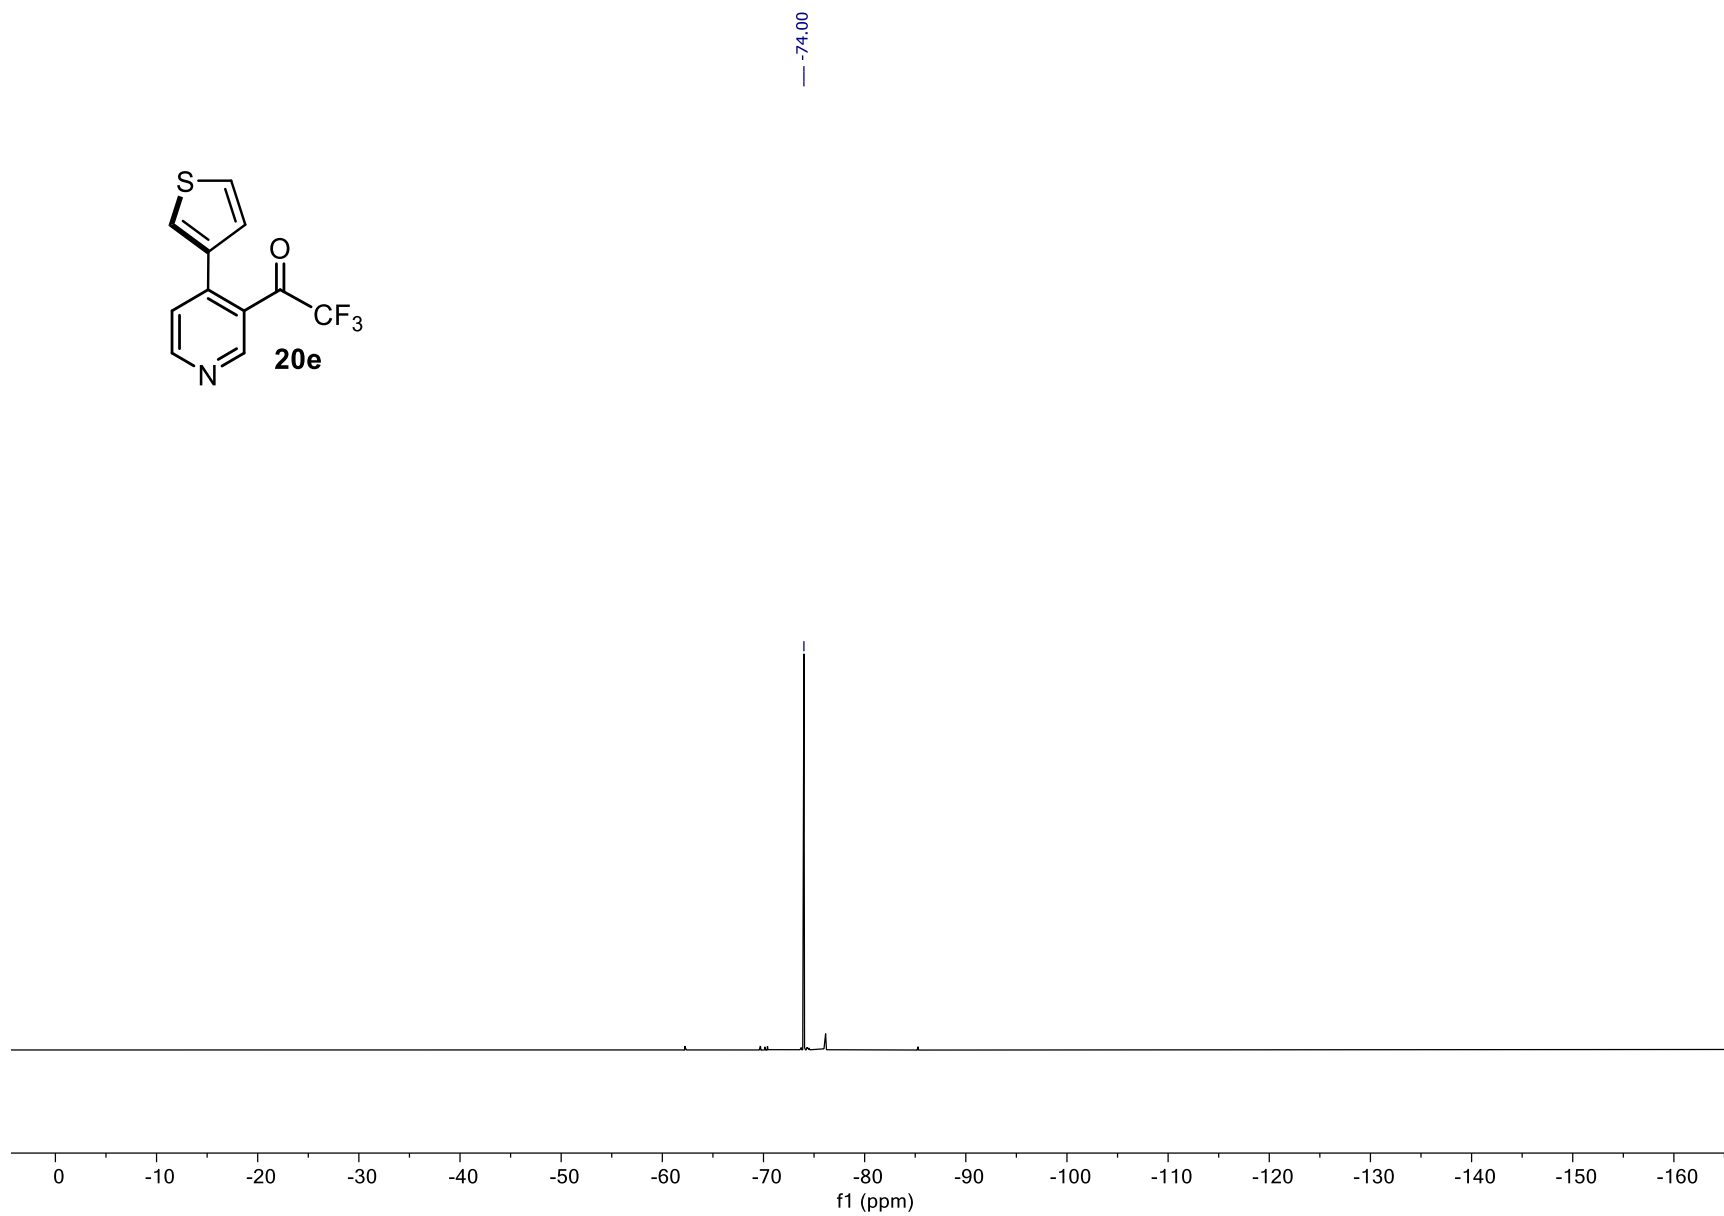

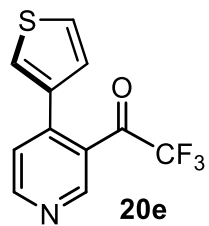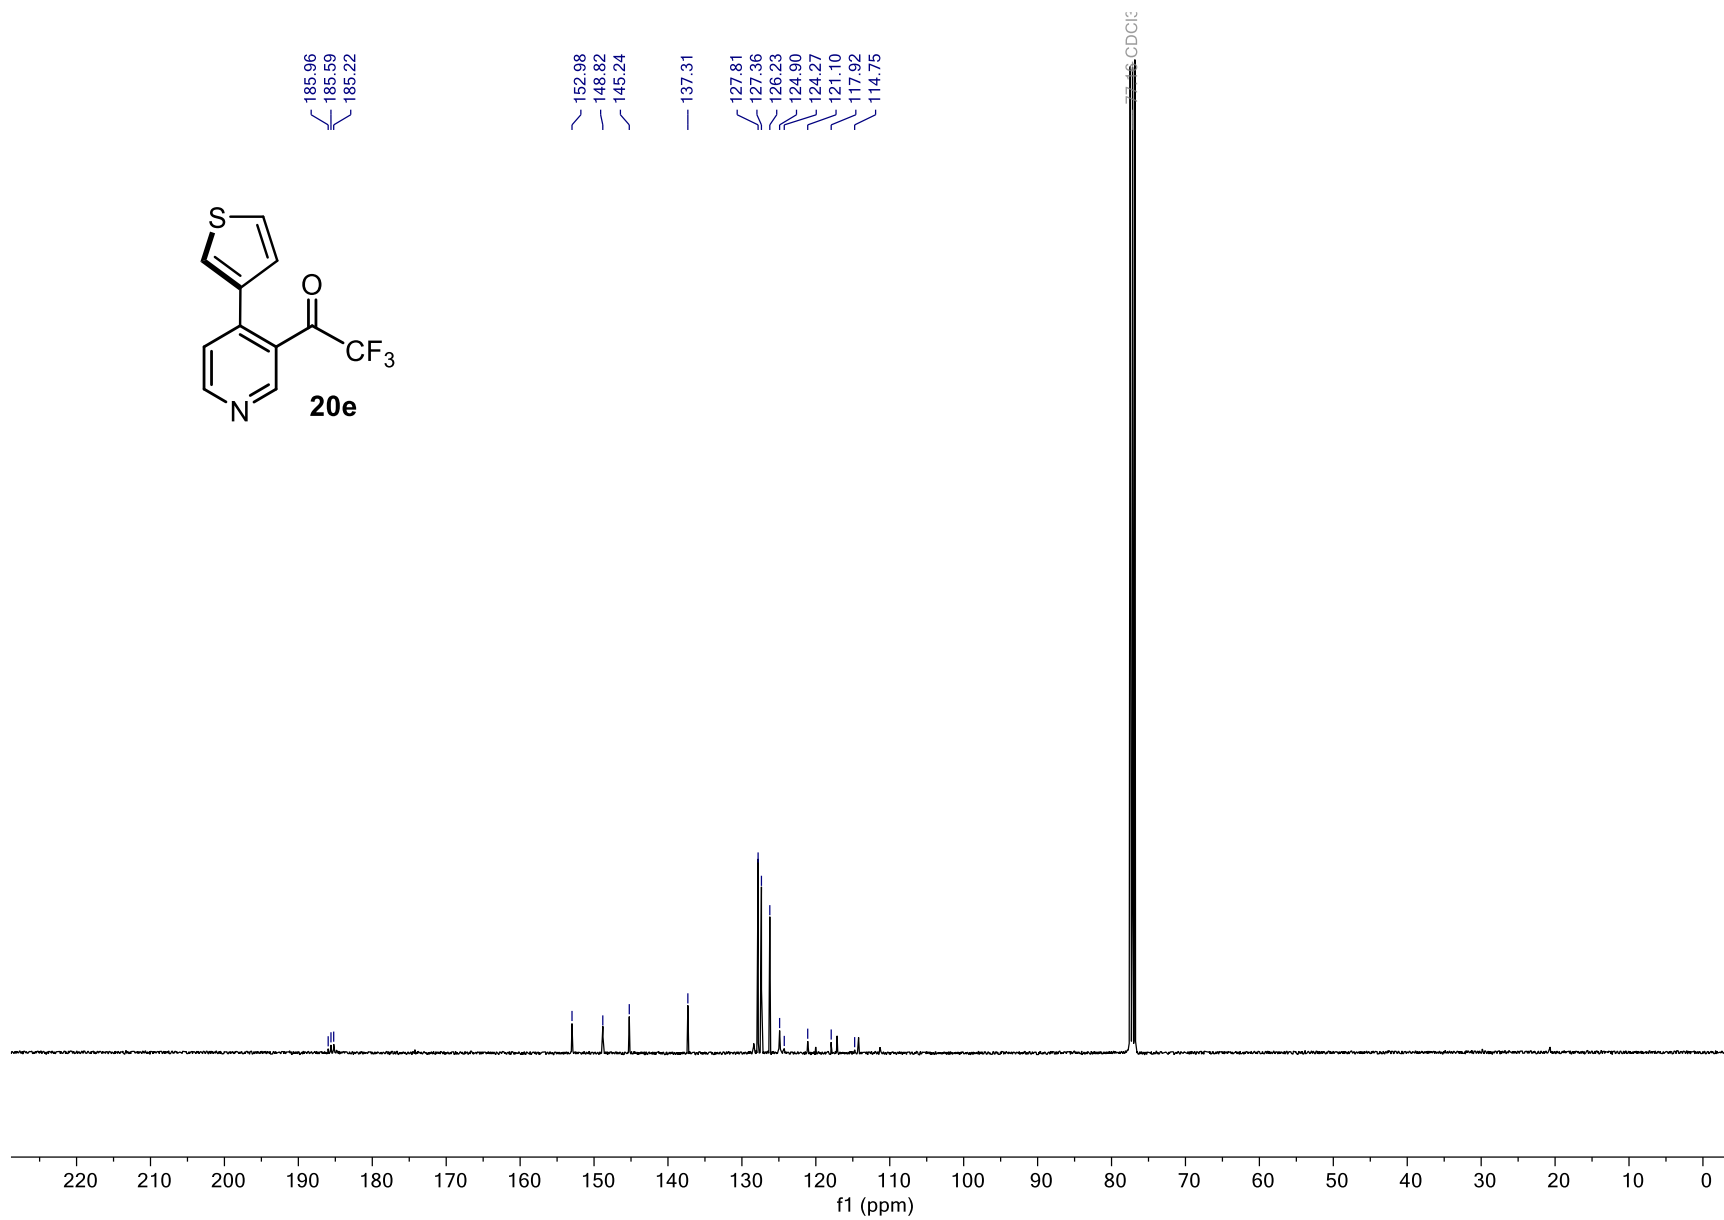

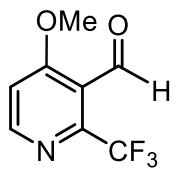

19f

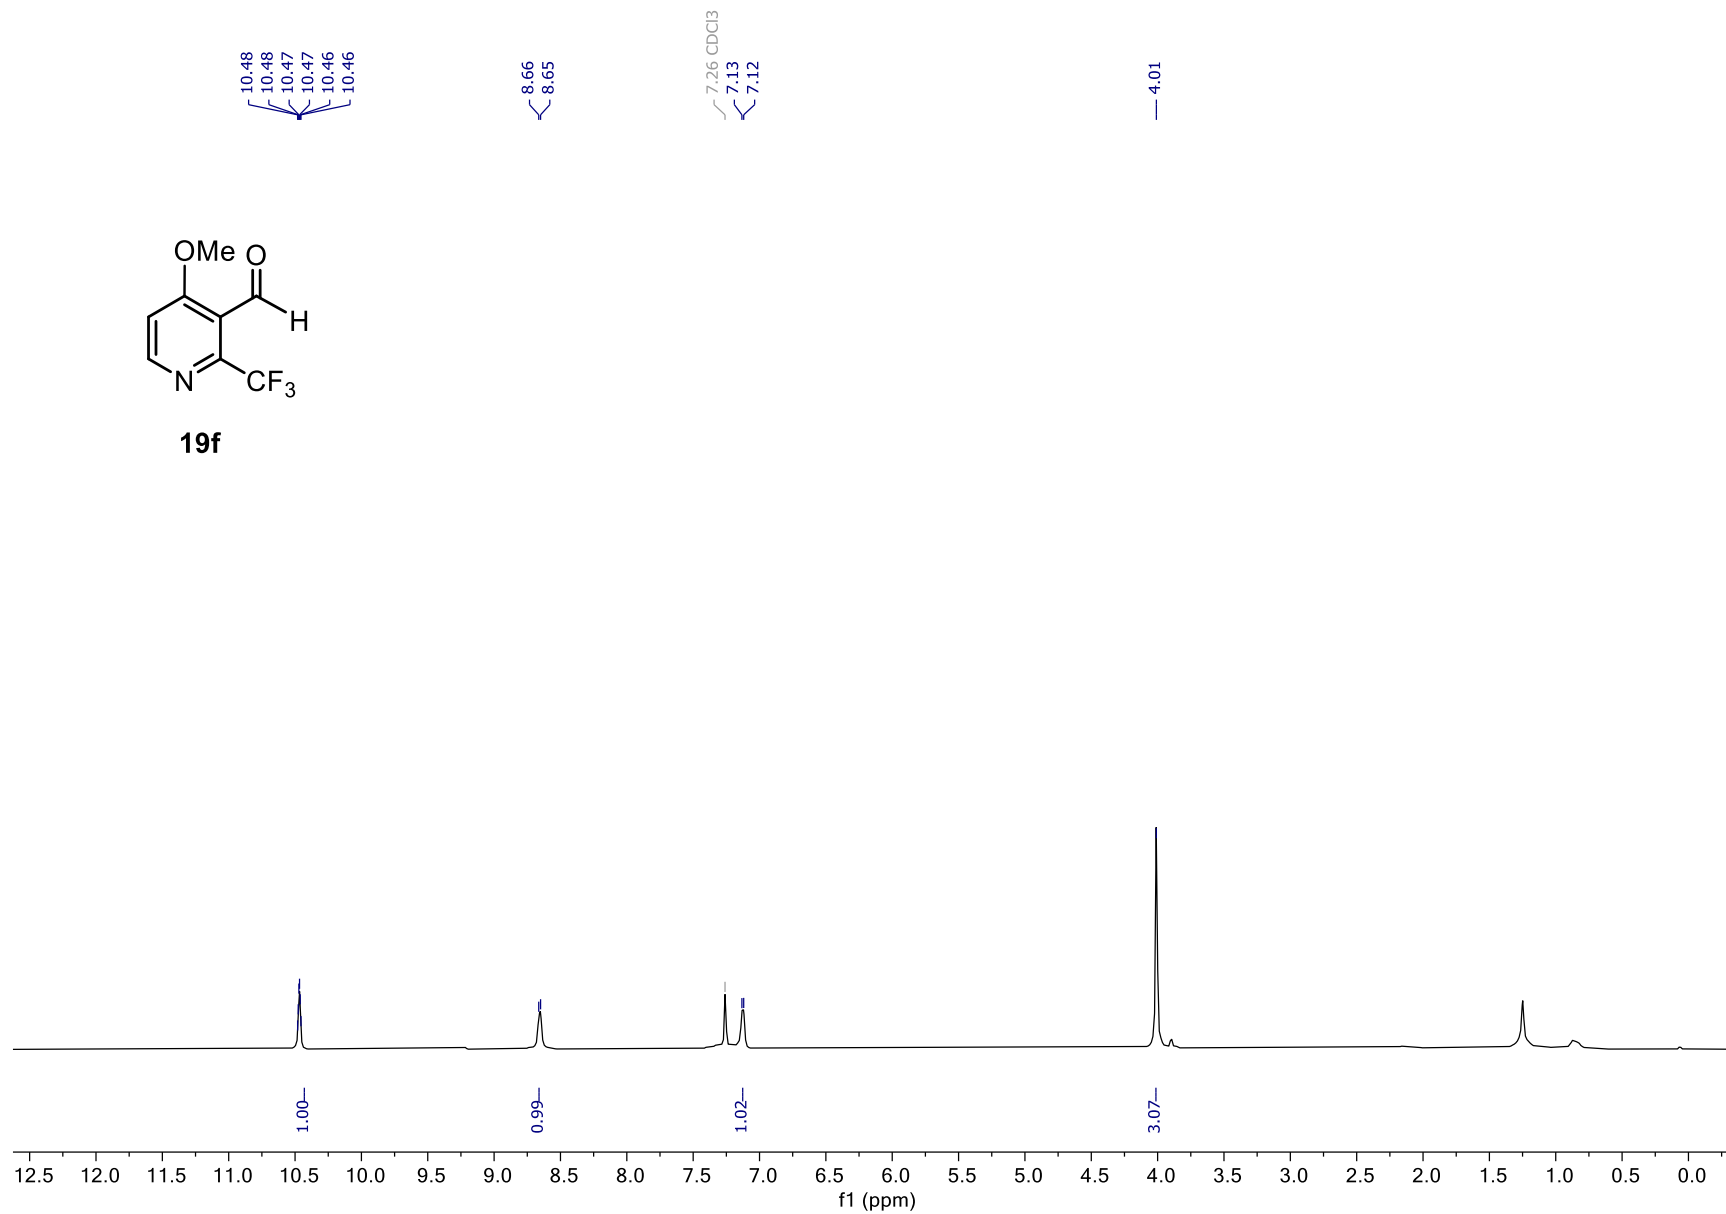

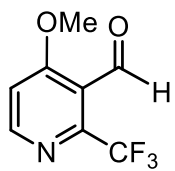

19f

-62.48  
-62.51  
-62.52  
-62.54

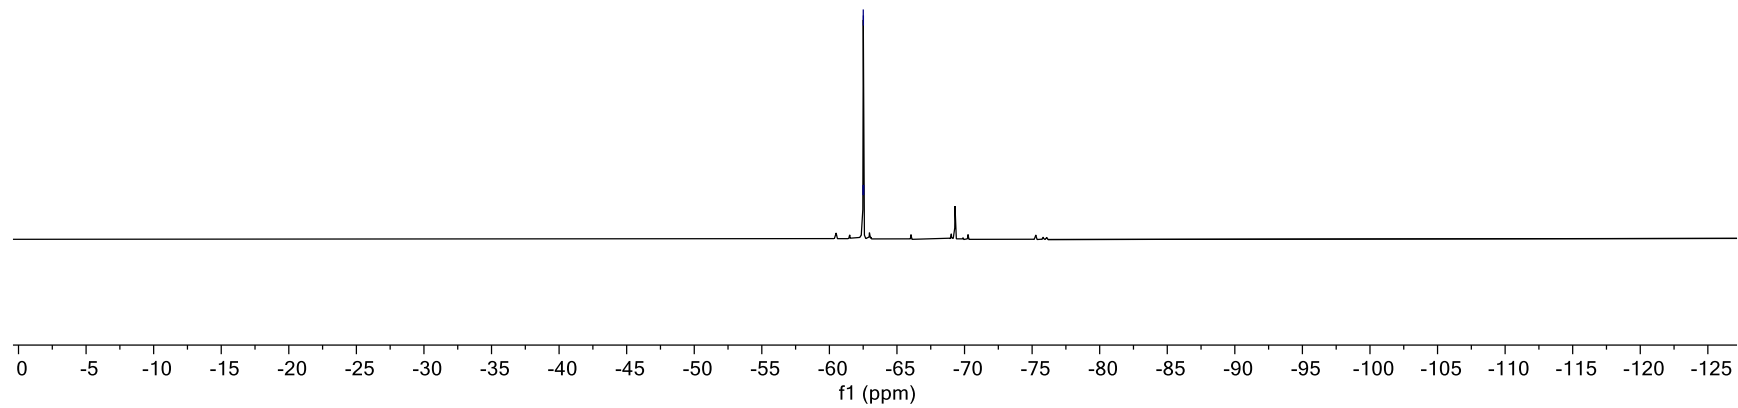

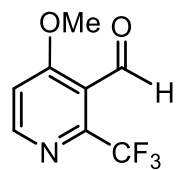

**19f**

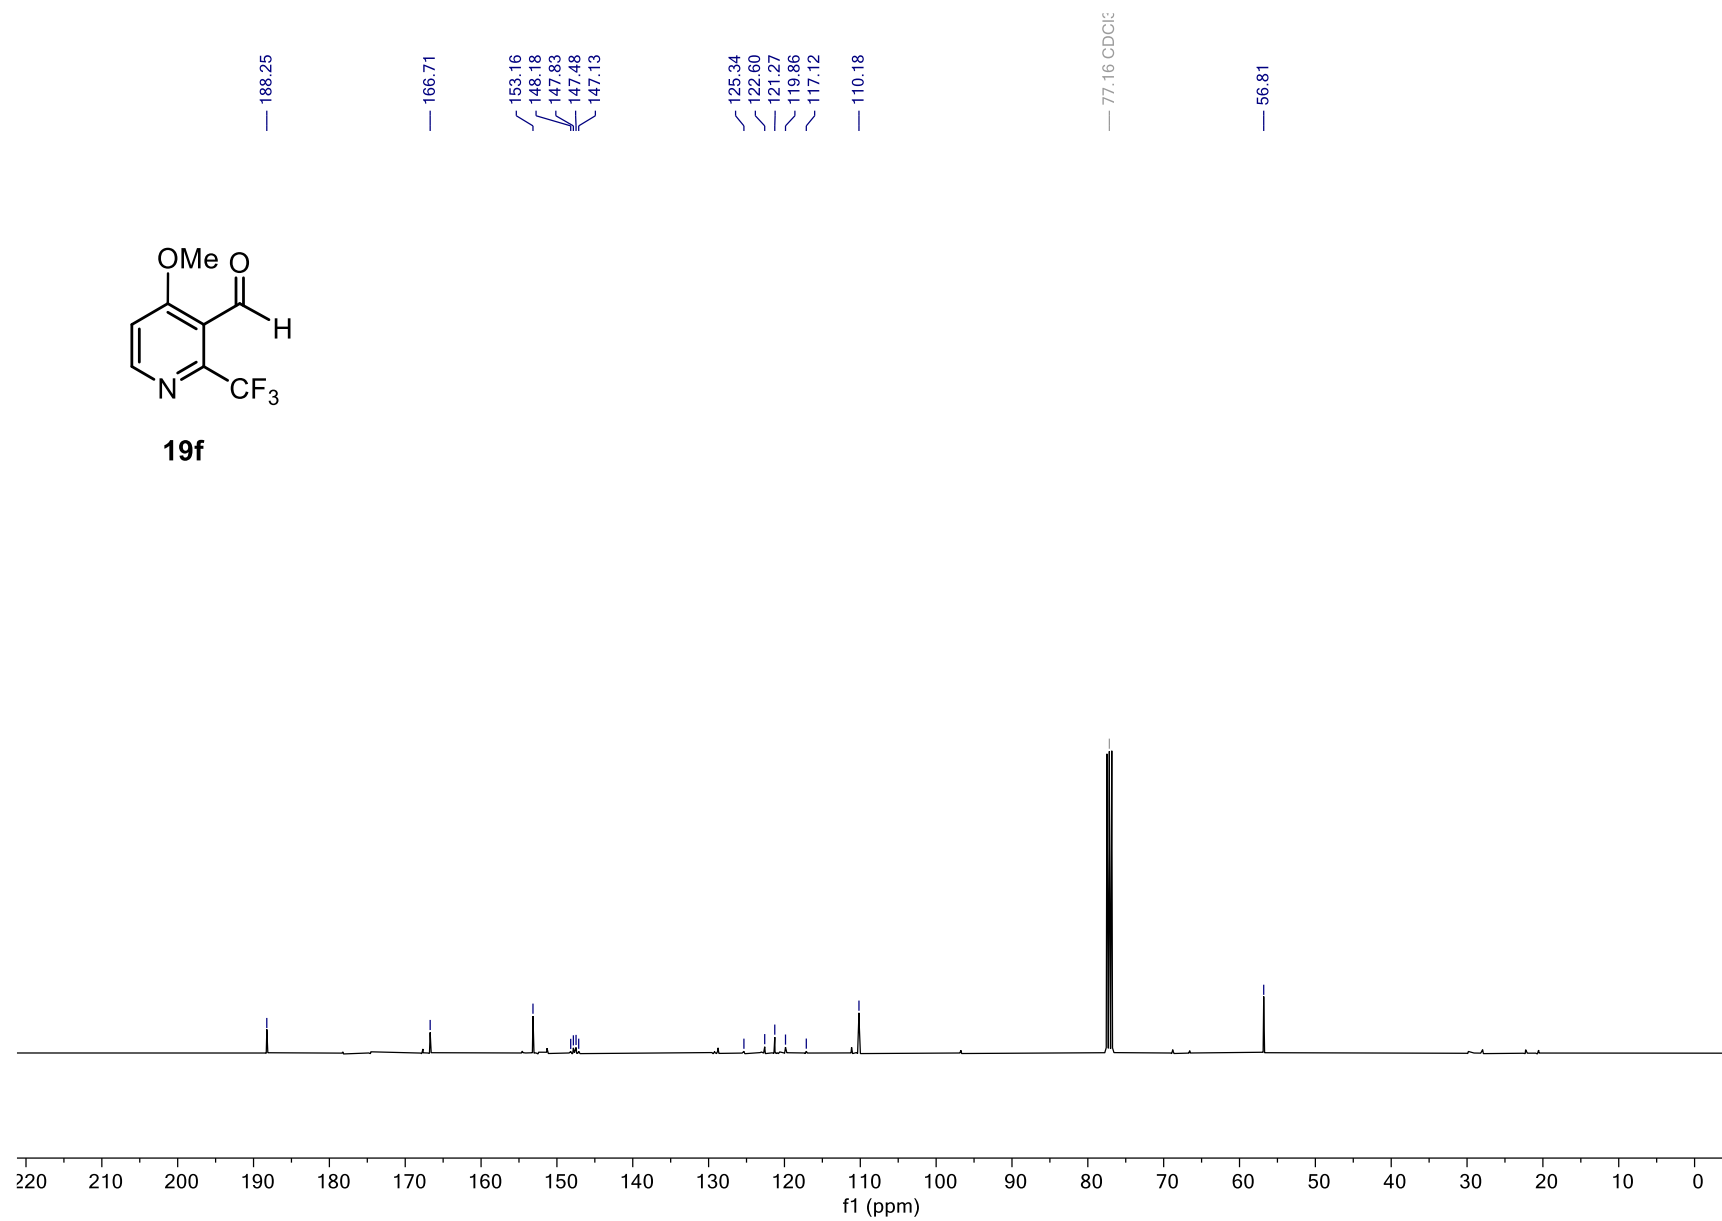

8.72  
8.72  
8.71  
8.71  
7.68  
7.68  
7.66  
7.66  
7.52  
7.51  
7.50  
7.49  
7.34  
7.33  
7.33  
7.32  
7.31  
7.31  
7.30  
7.30  
7.29  
7.29  
7.26 CDCl3  
7.23  
7.23  
7.22  
7.22  
7.21  
7.21  
5.94  
5.27

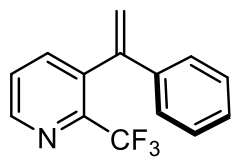

21

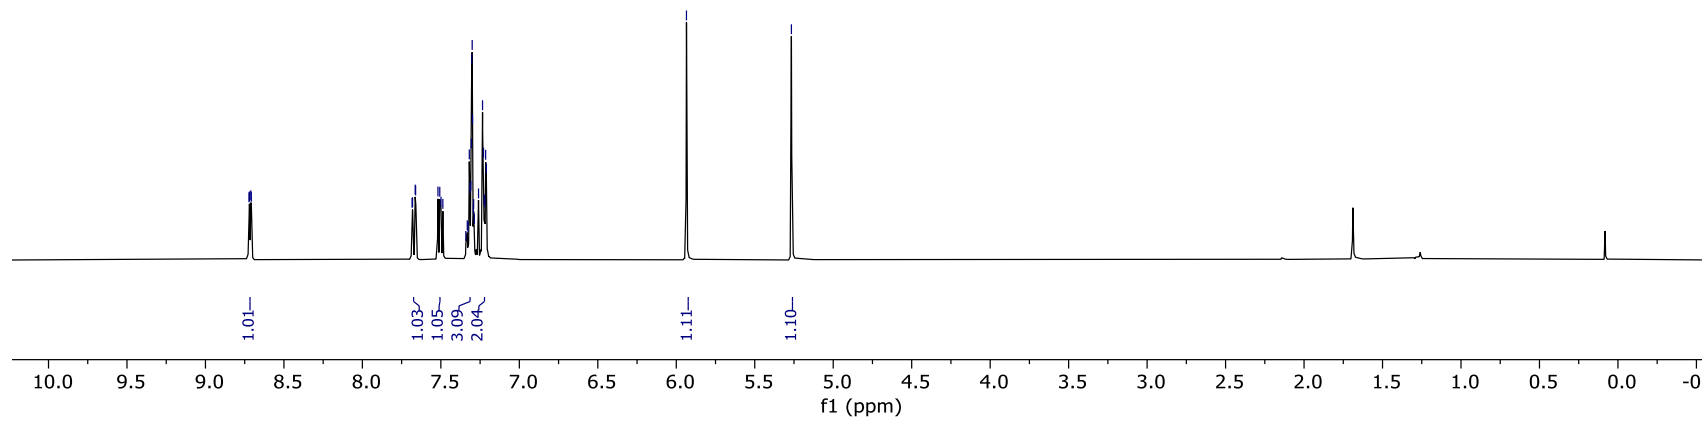

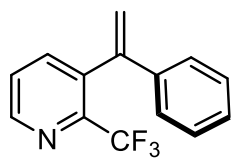

21

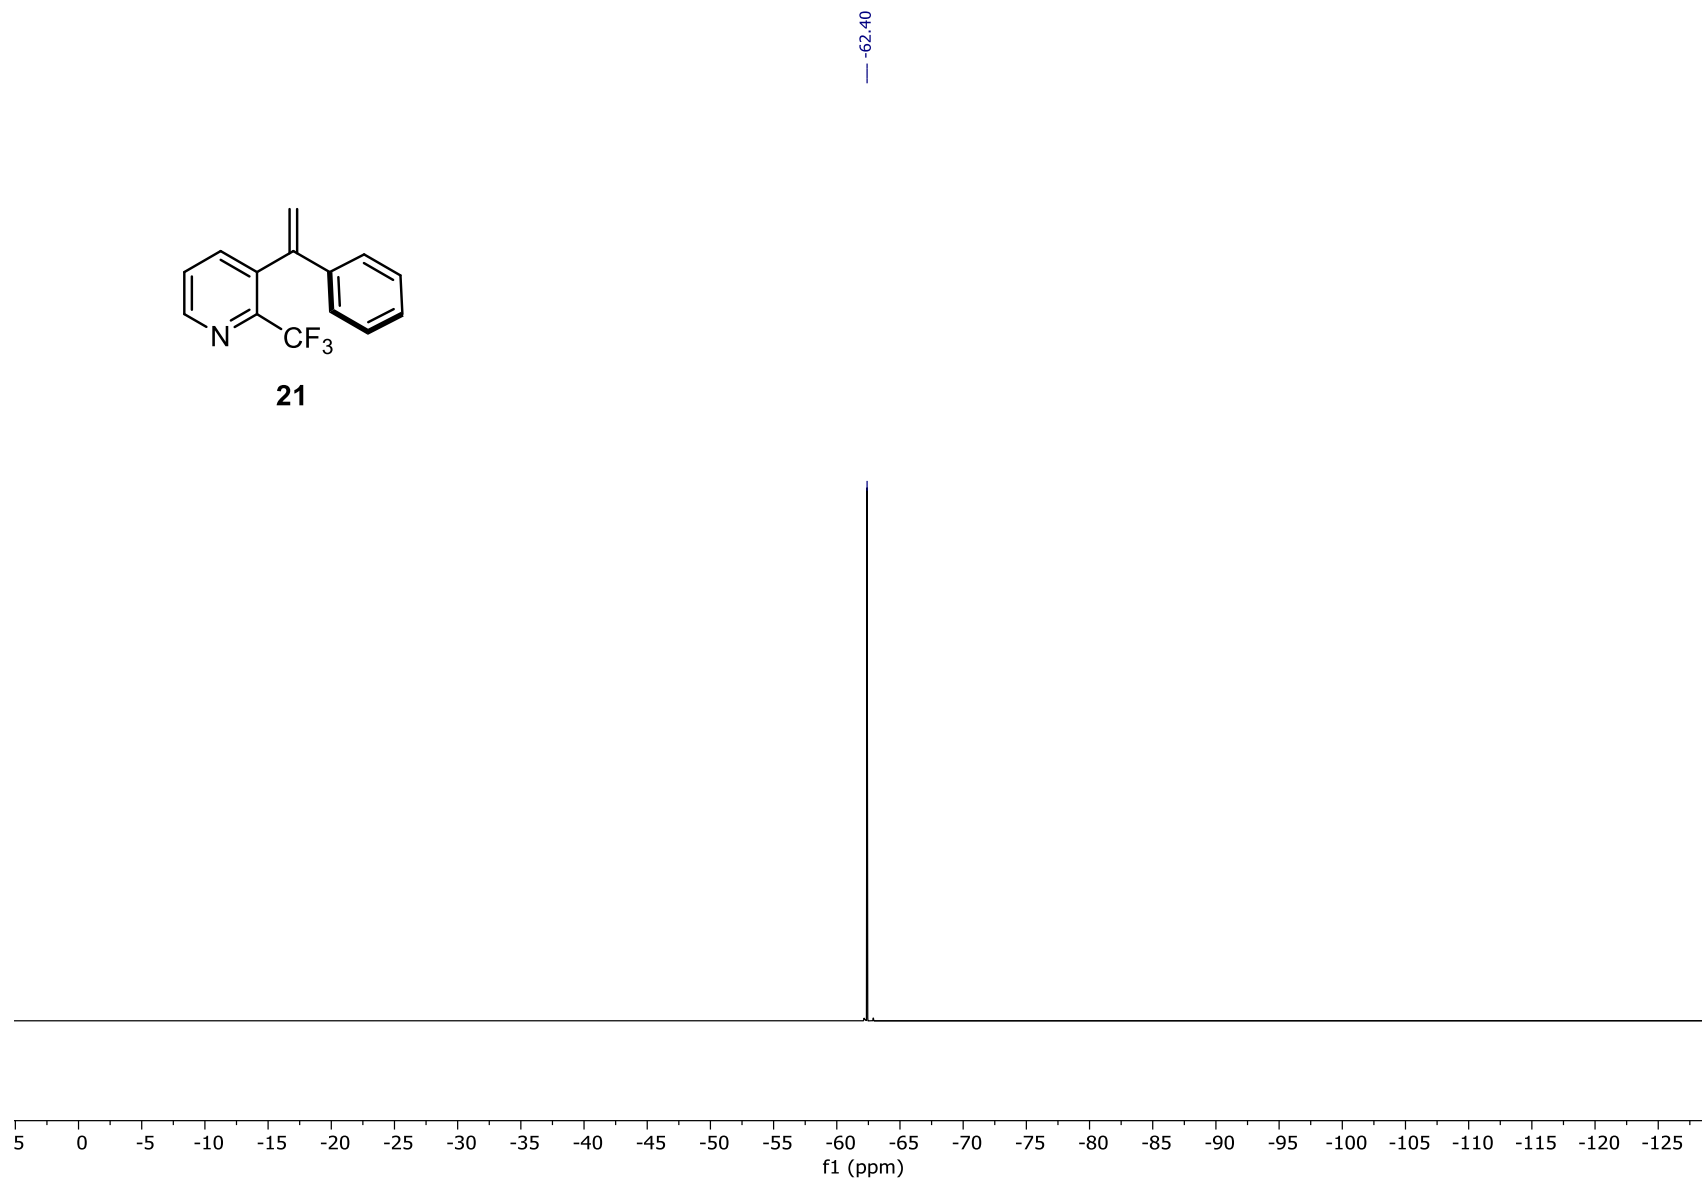

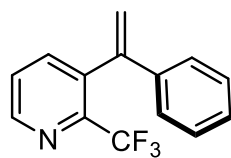

21

148.4  
146.4  
146.1  
145.8  
145.5  
144.3  
140.4  
139.4  
136.8  
128.6  
128.3  
126.7  
126.0  
123.3  
120.6  
117.8  
117.1  
117.1

— 77.2 CDCl<sub>3</sub>

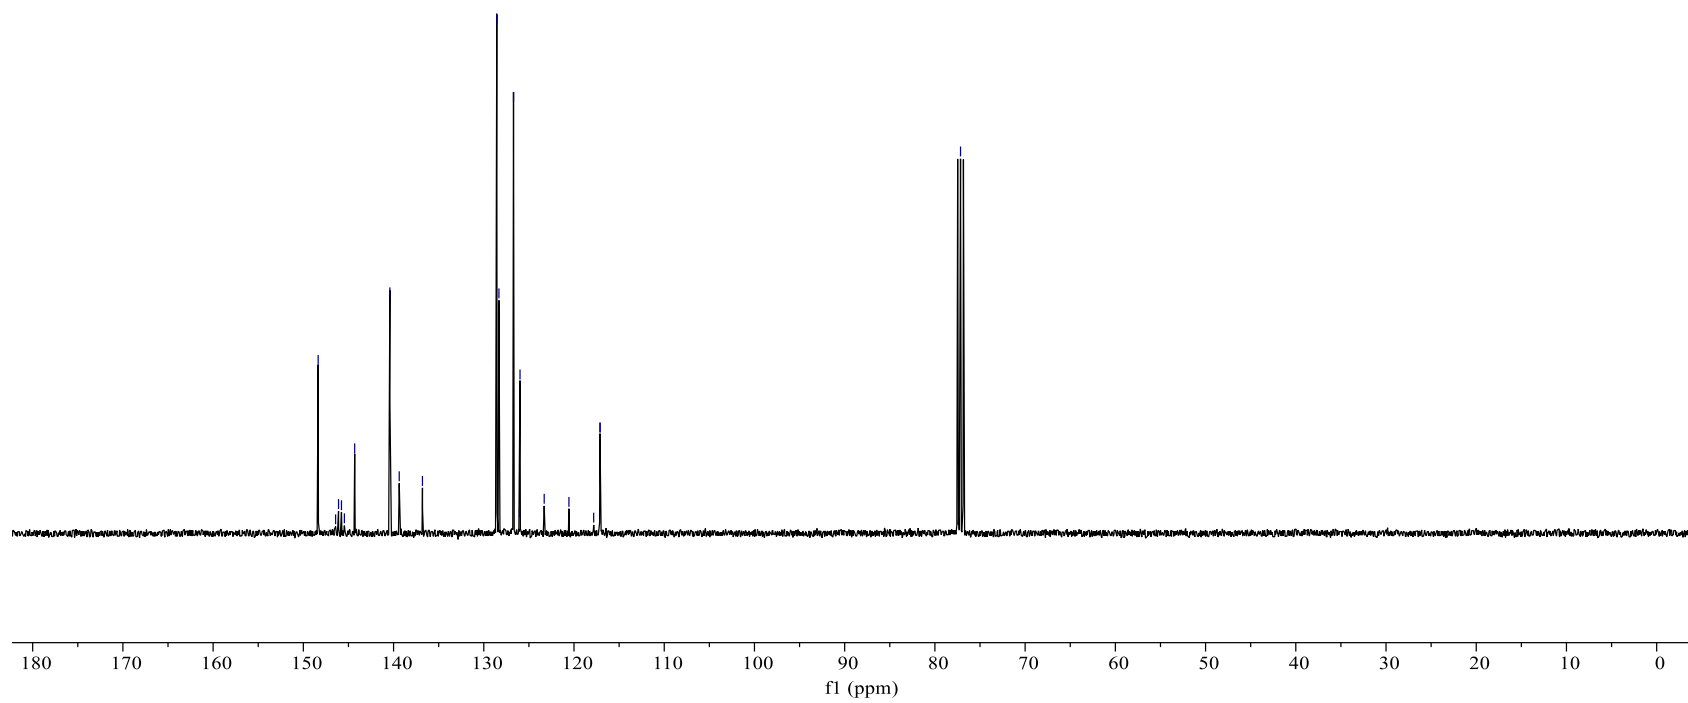

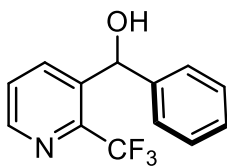

22

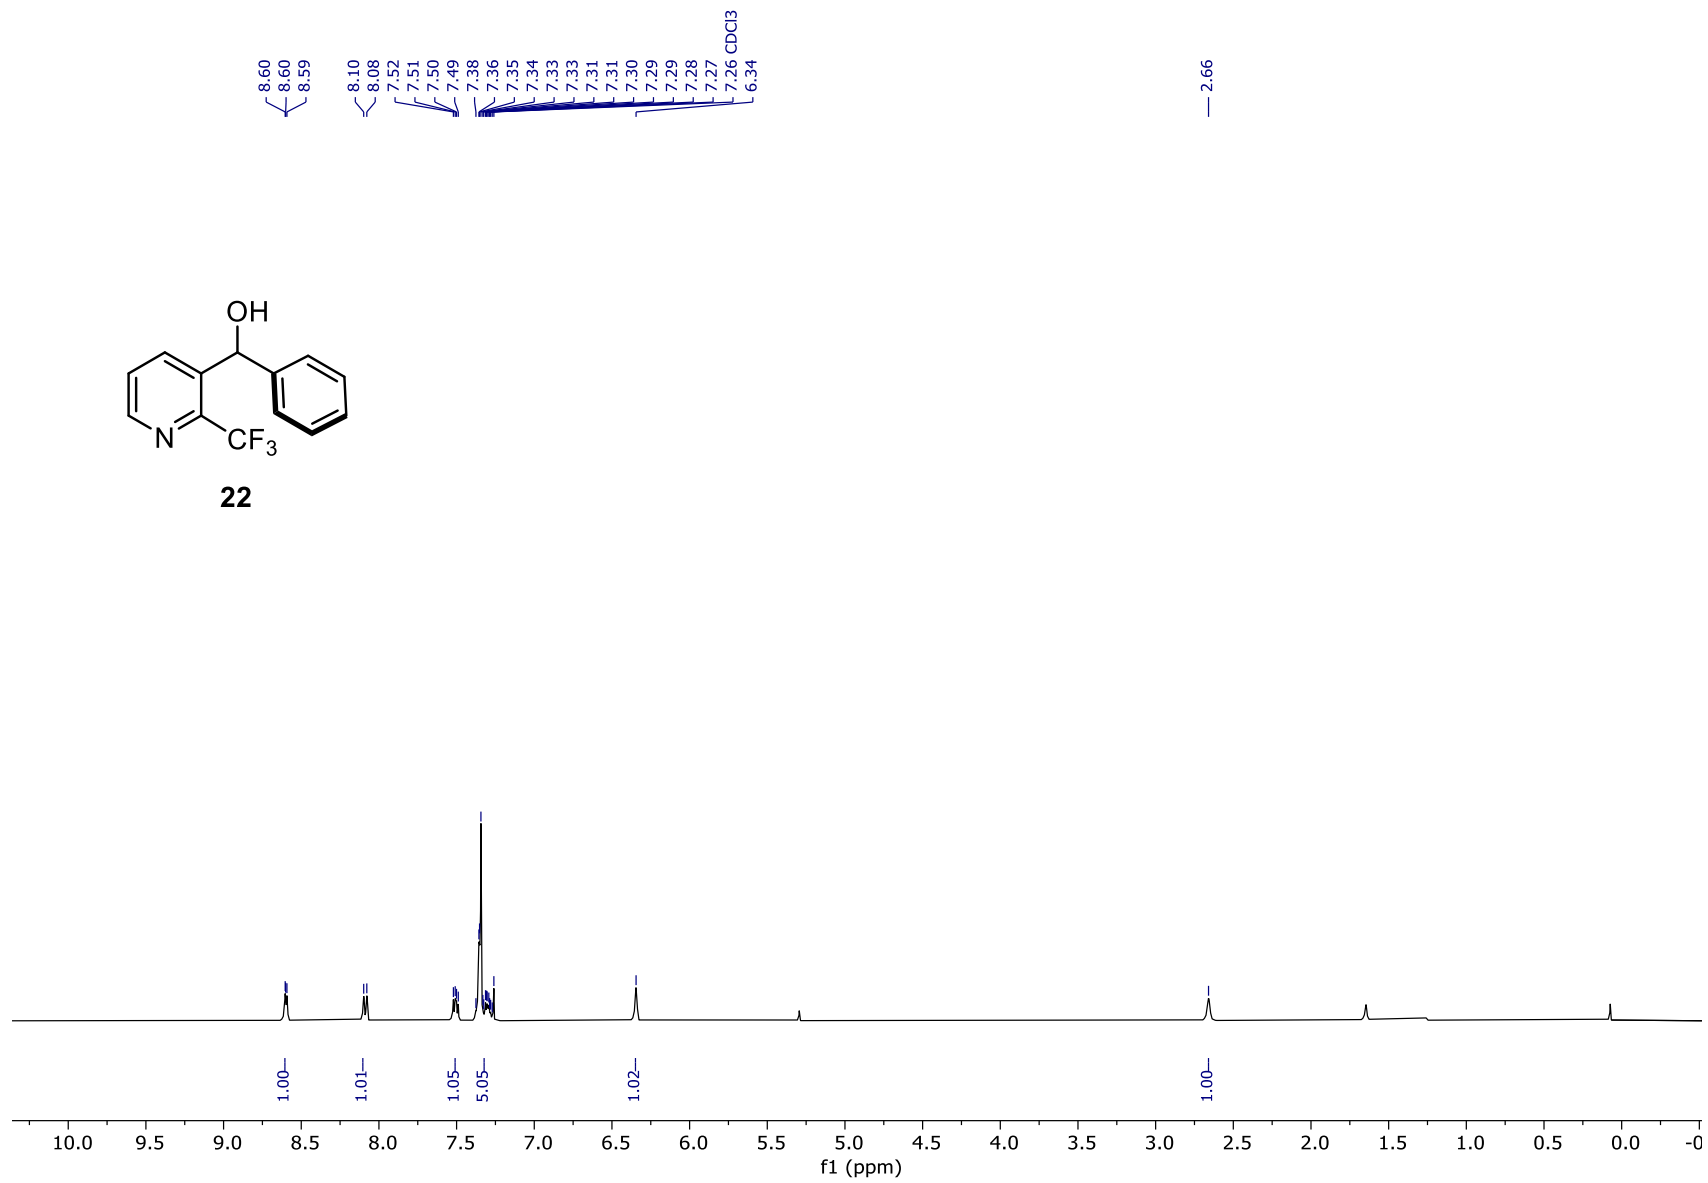

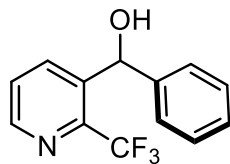

22

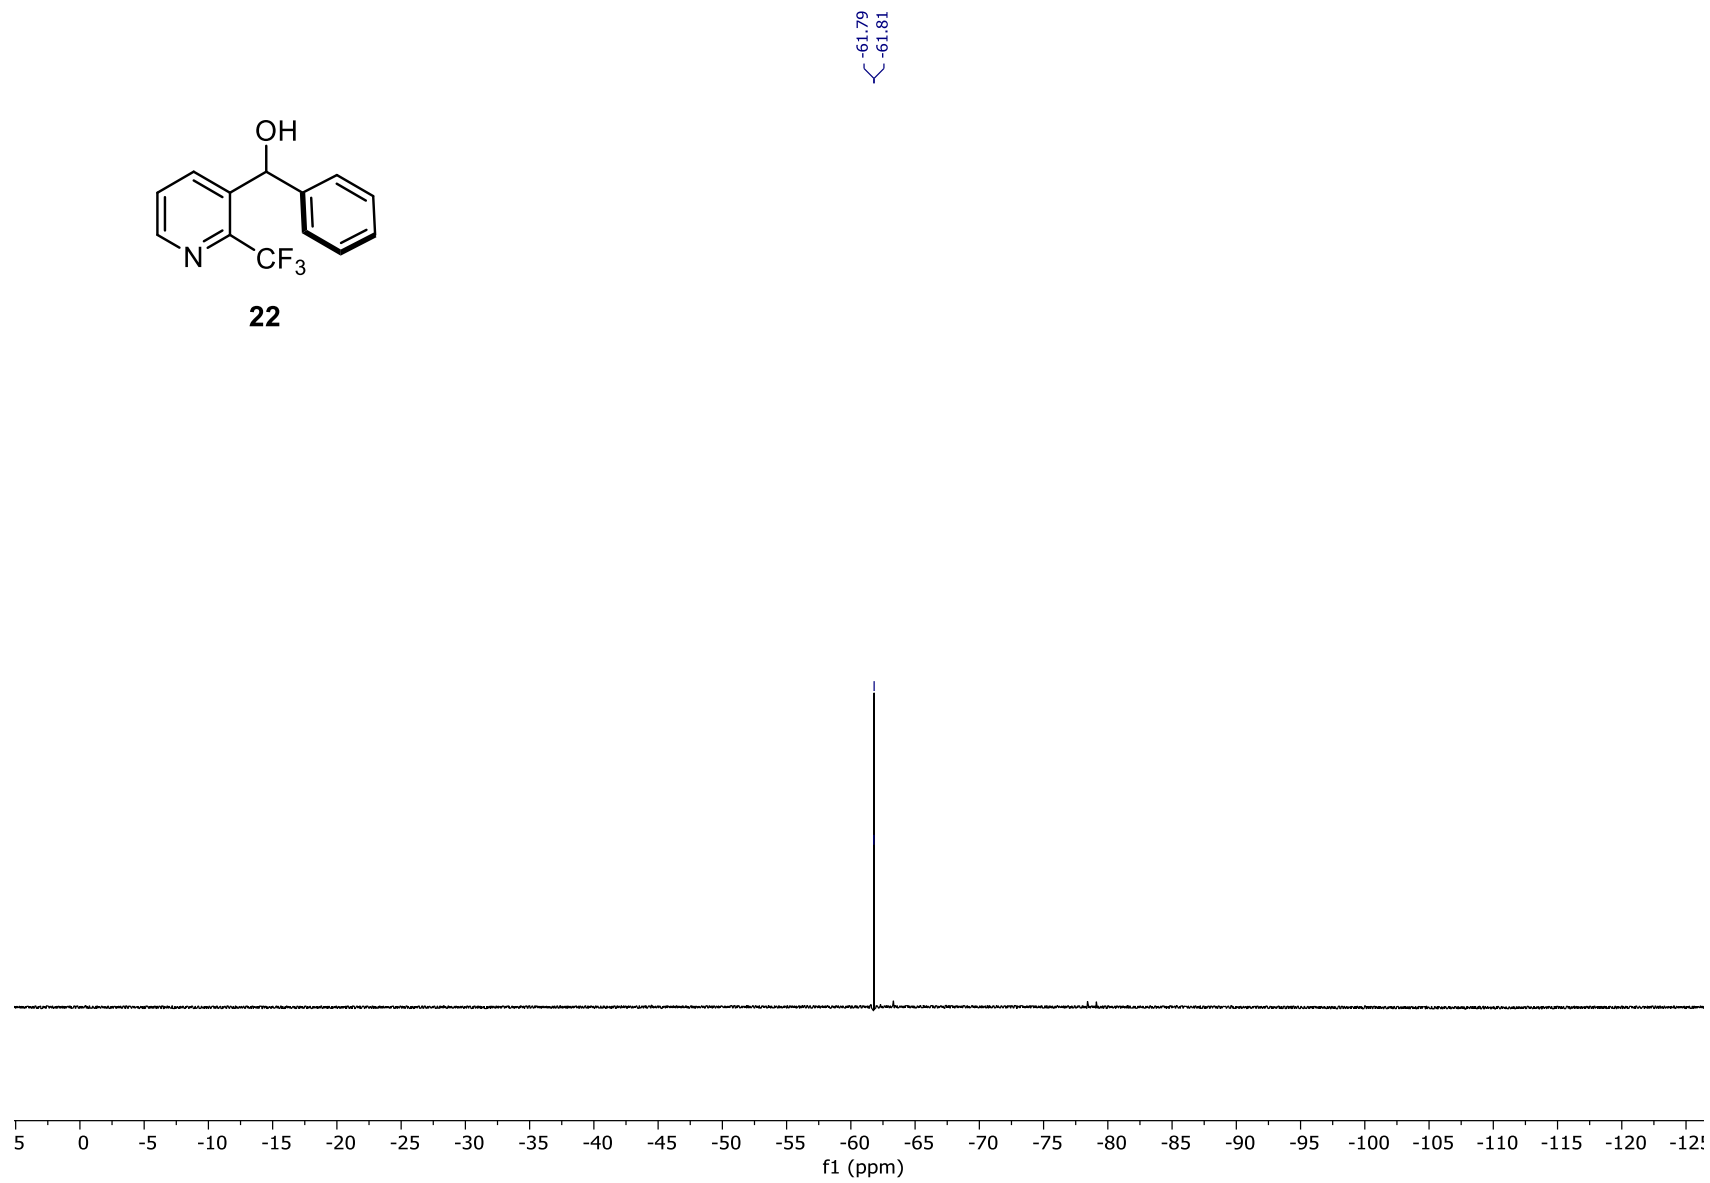

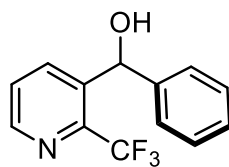

22

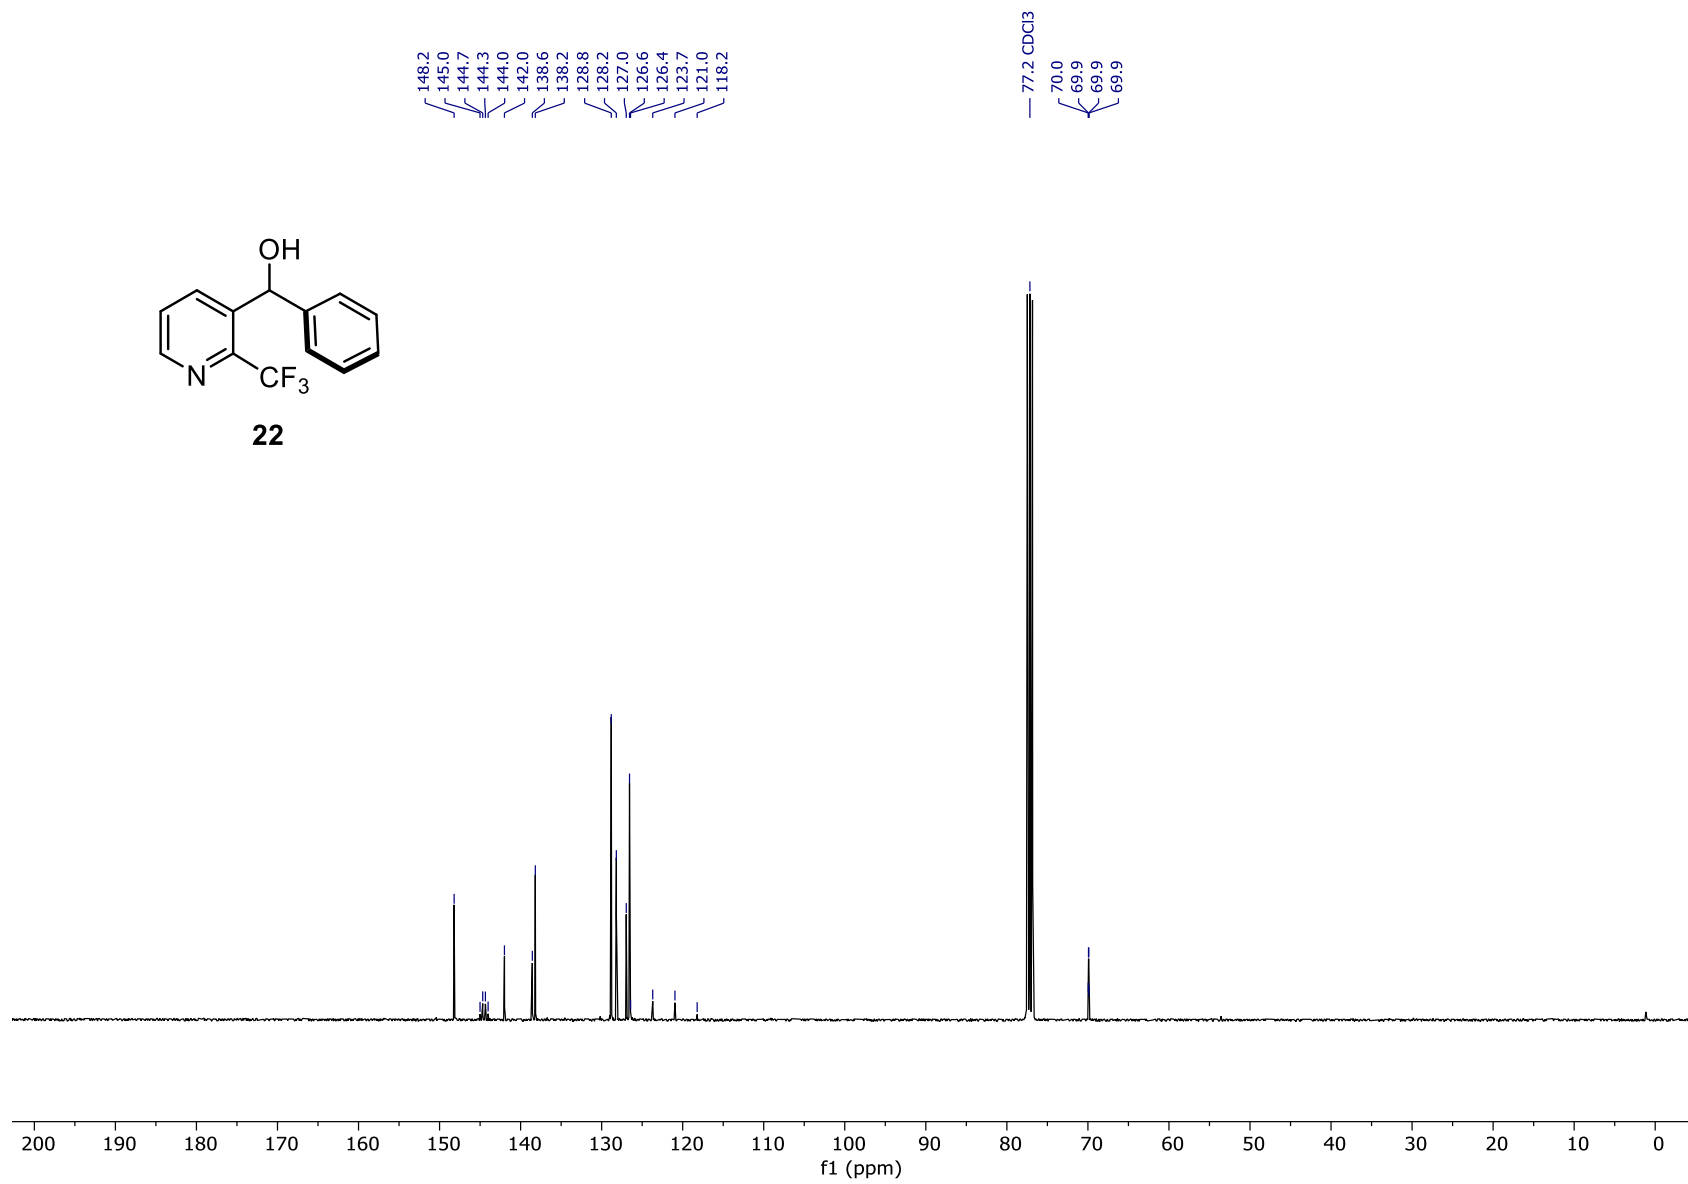

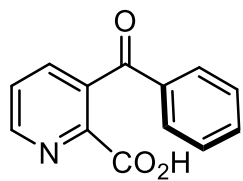

23

8.84  
8.84  
8.39  
7.87  
7.85  
7.74  
7.72  
7.71  
7.69  
7.68  
7.59  
7.58  
7.56  
7.46  
7.44  
7.42  
7.26 CDCl<sub>3</sub>

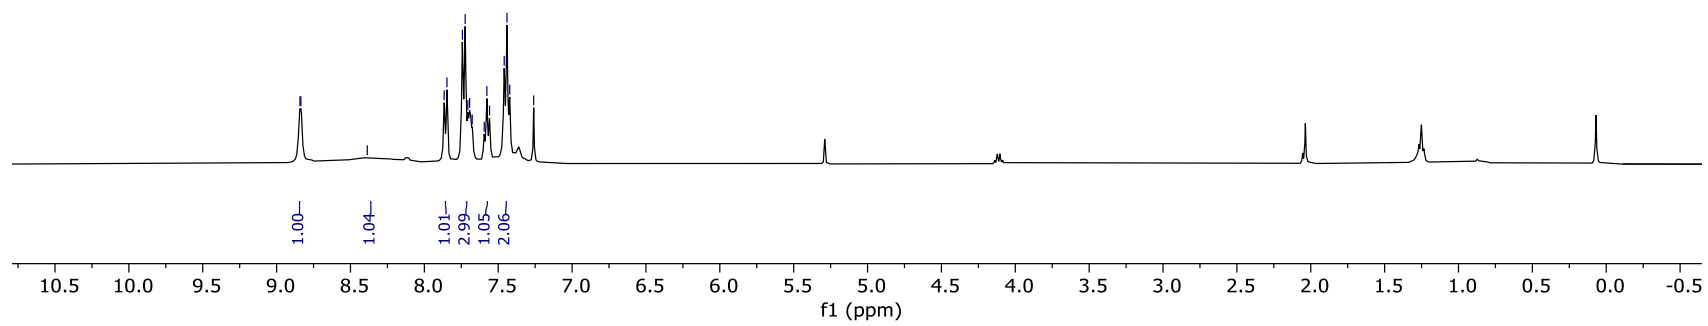

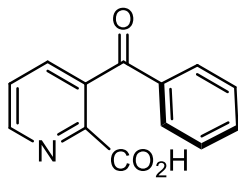

23

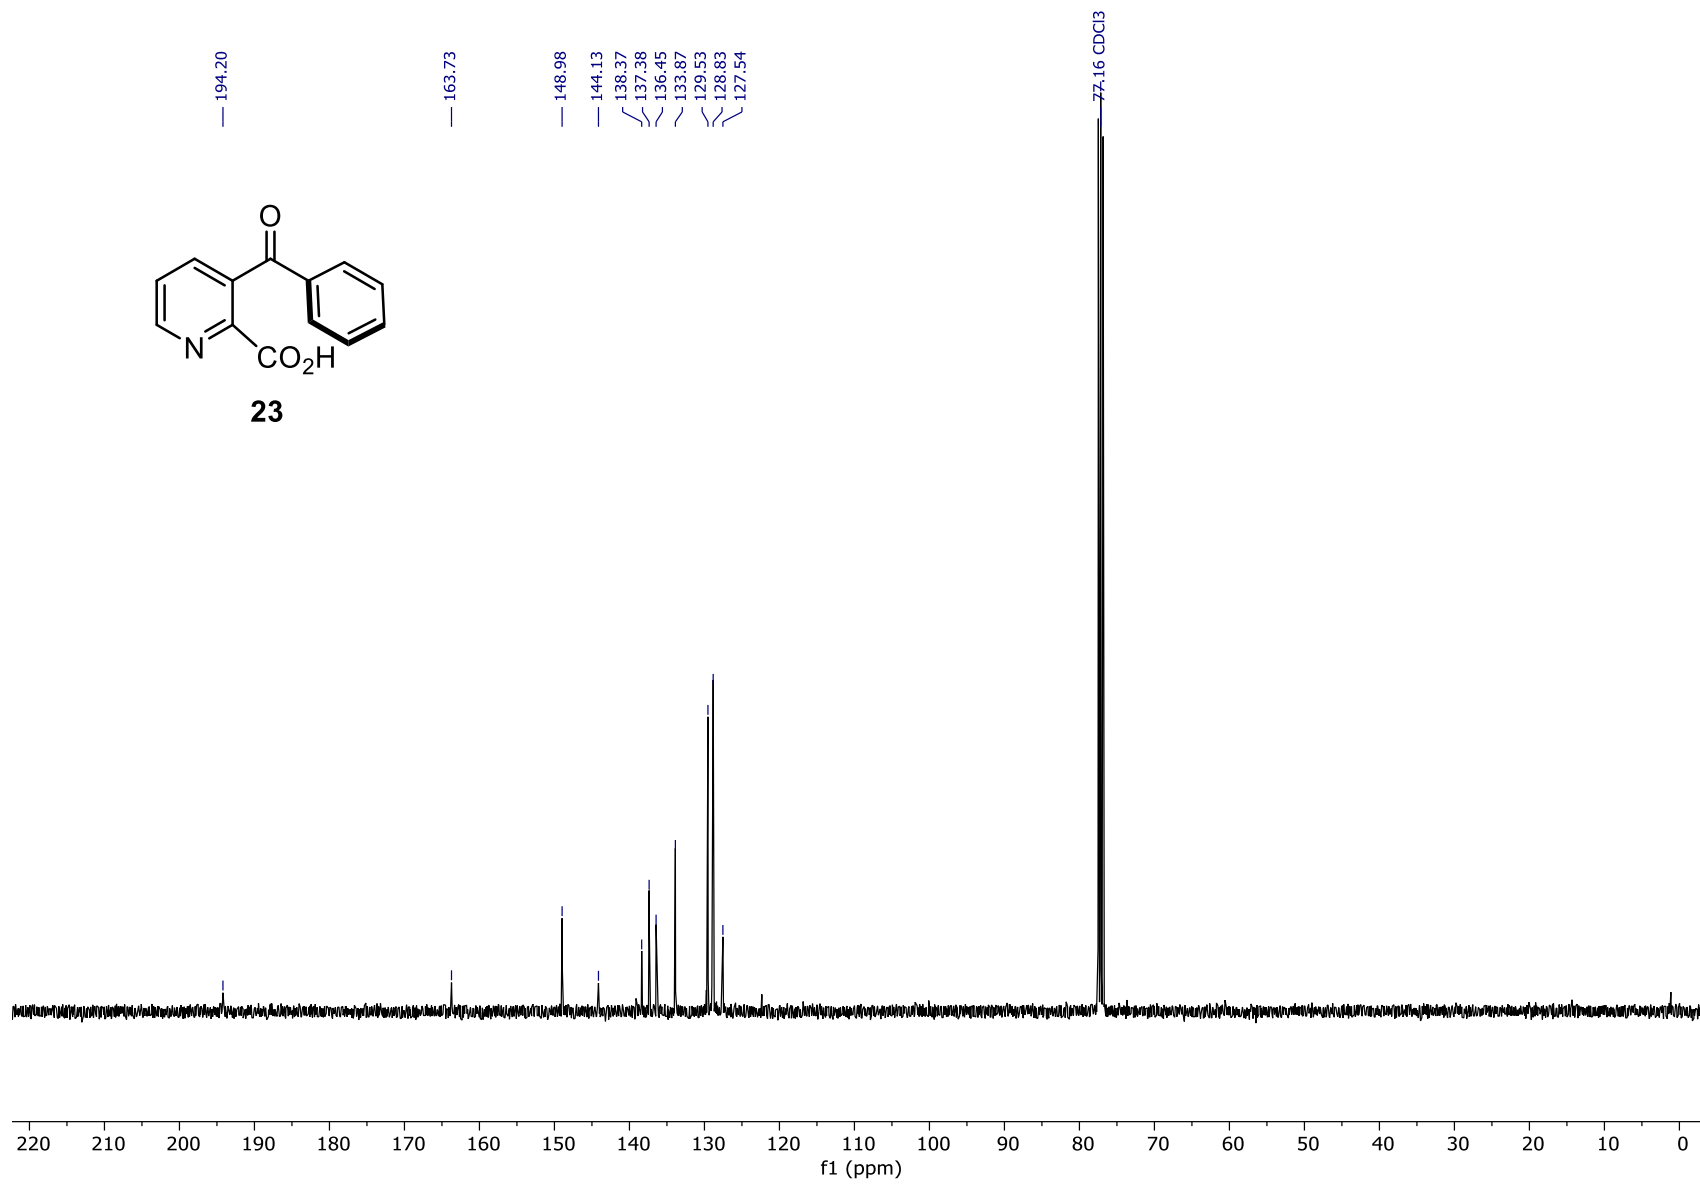

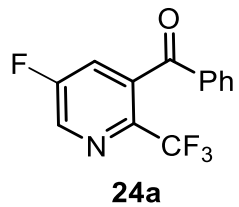

8.69  
8.69  
7.77  
7.75  
7.75  
7.68  
7.67  
7.65  
7.53  
7.51  
7.49  
7.49  
7.48  
7.48  
7.26 CDCl<sub>3</sub>

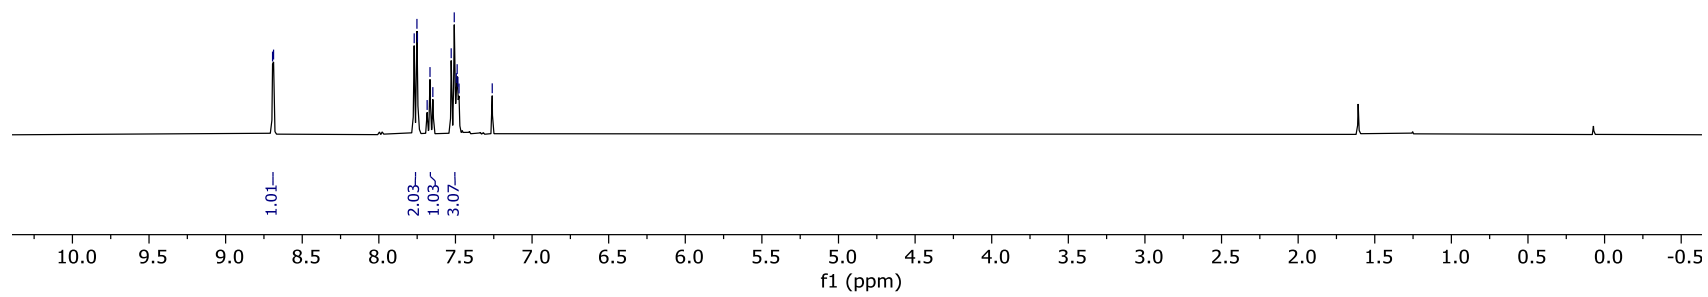

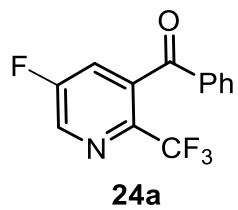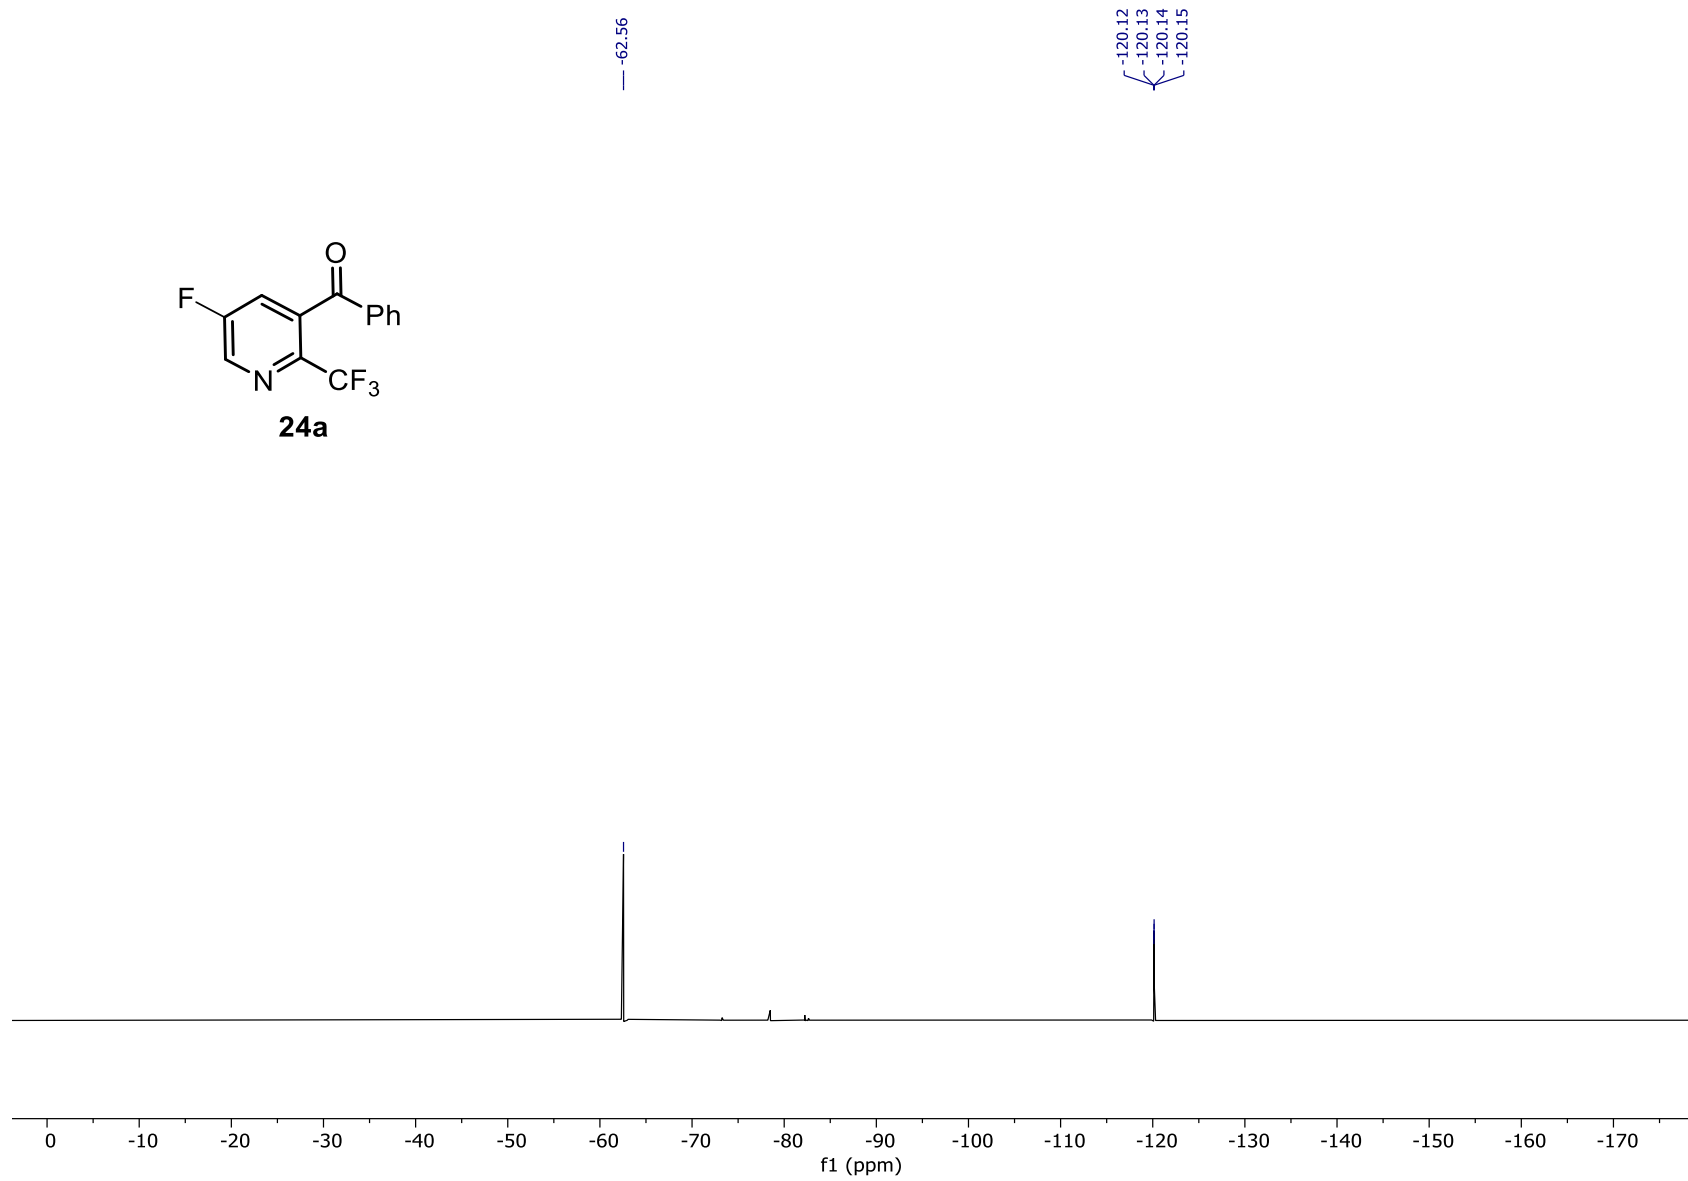

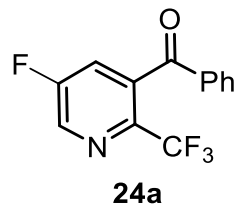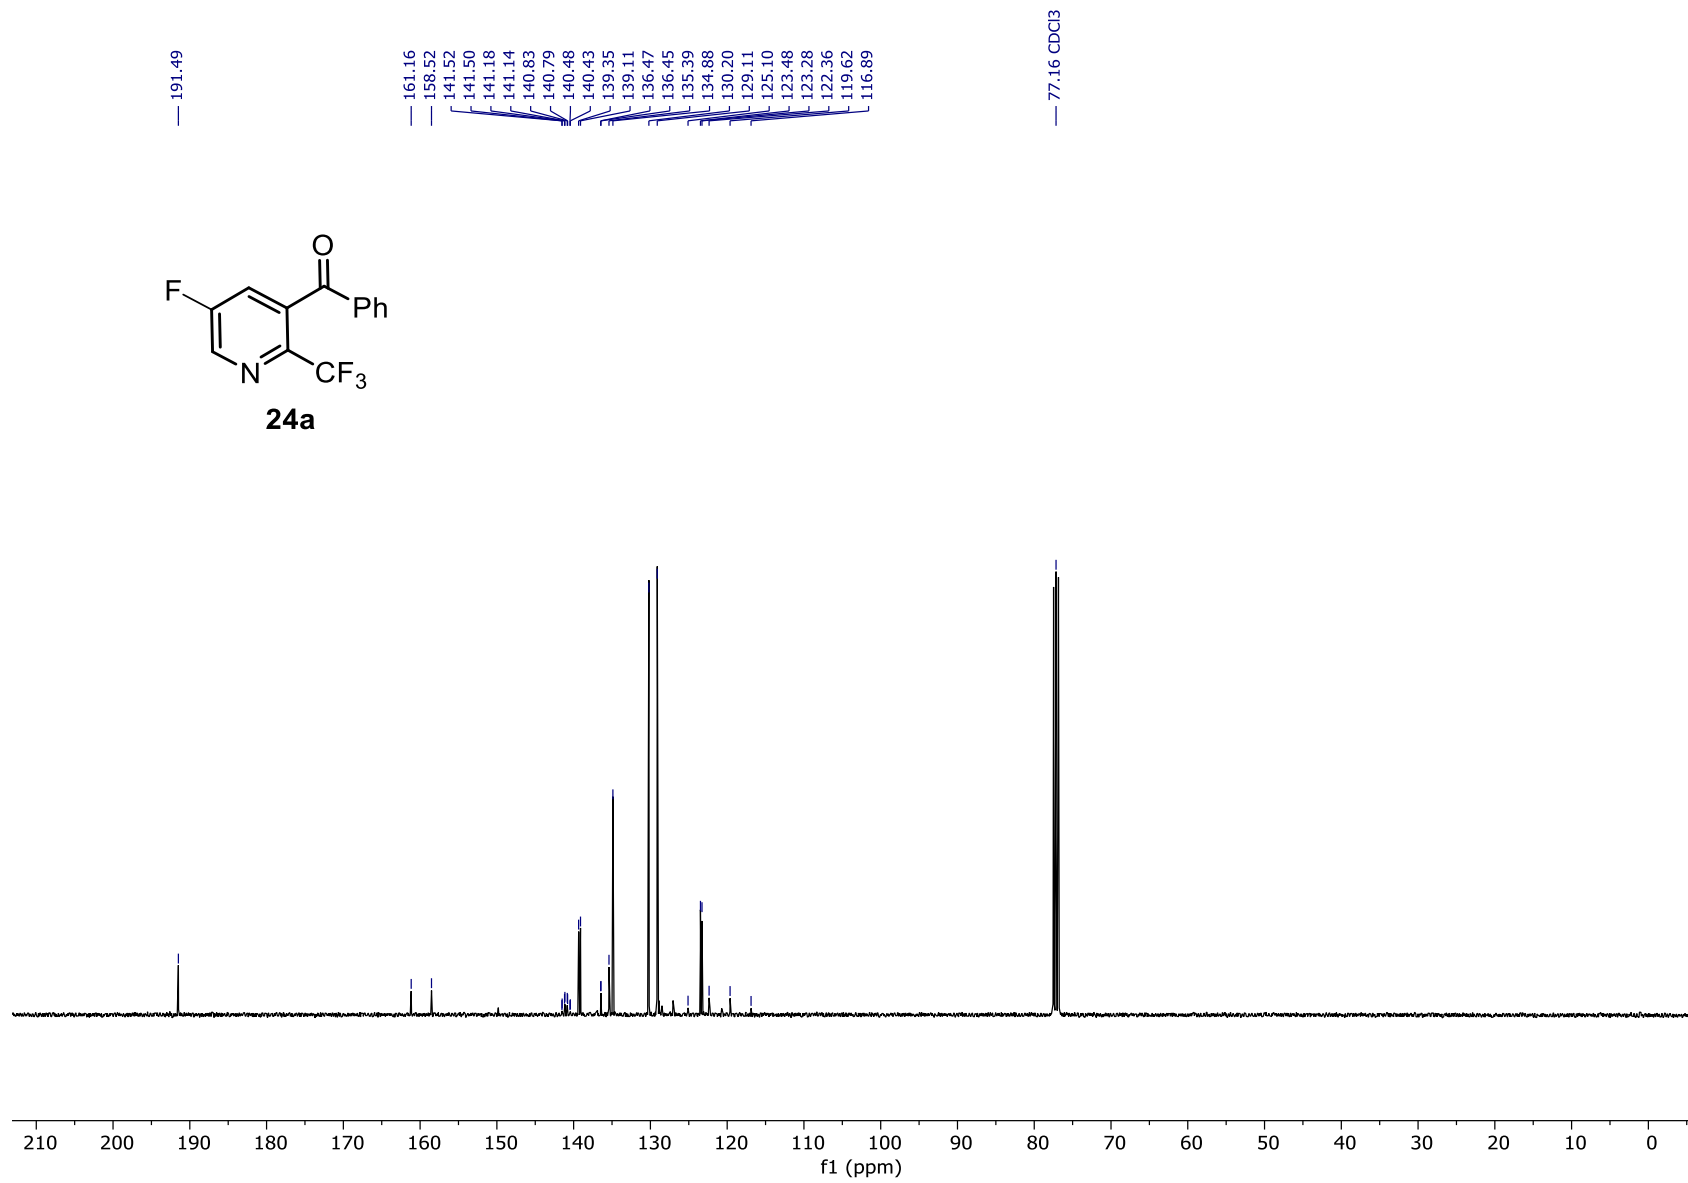

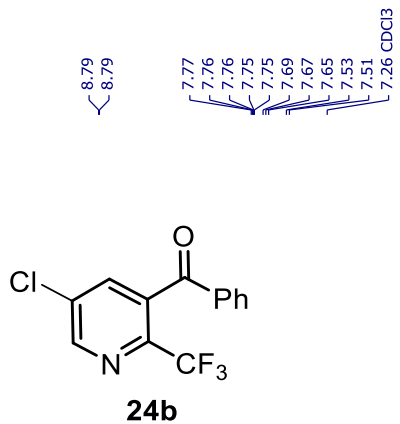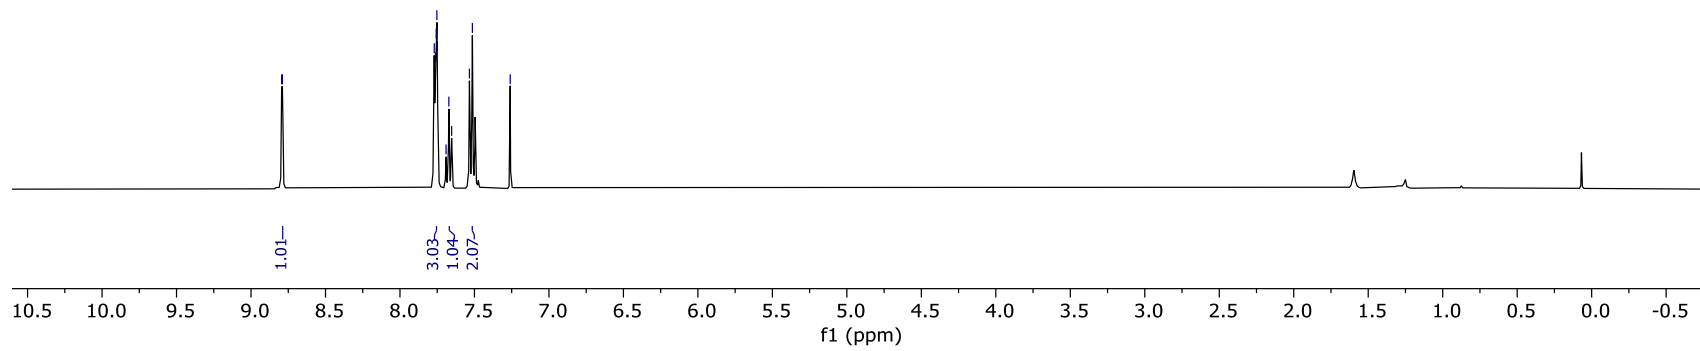

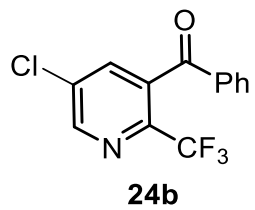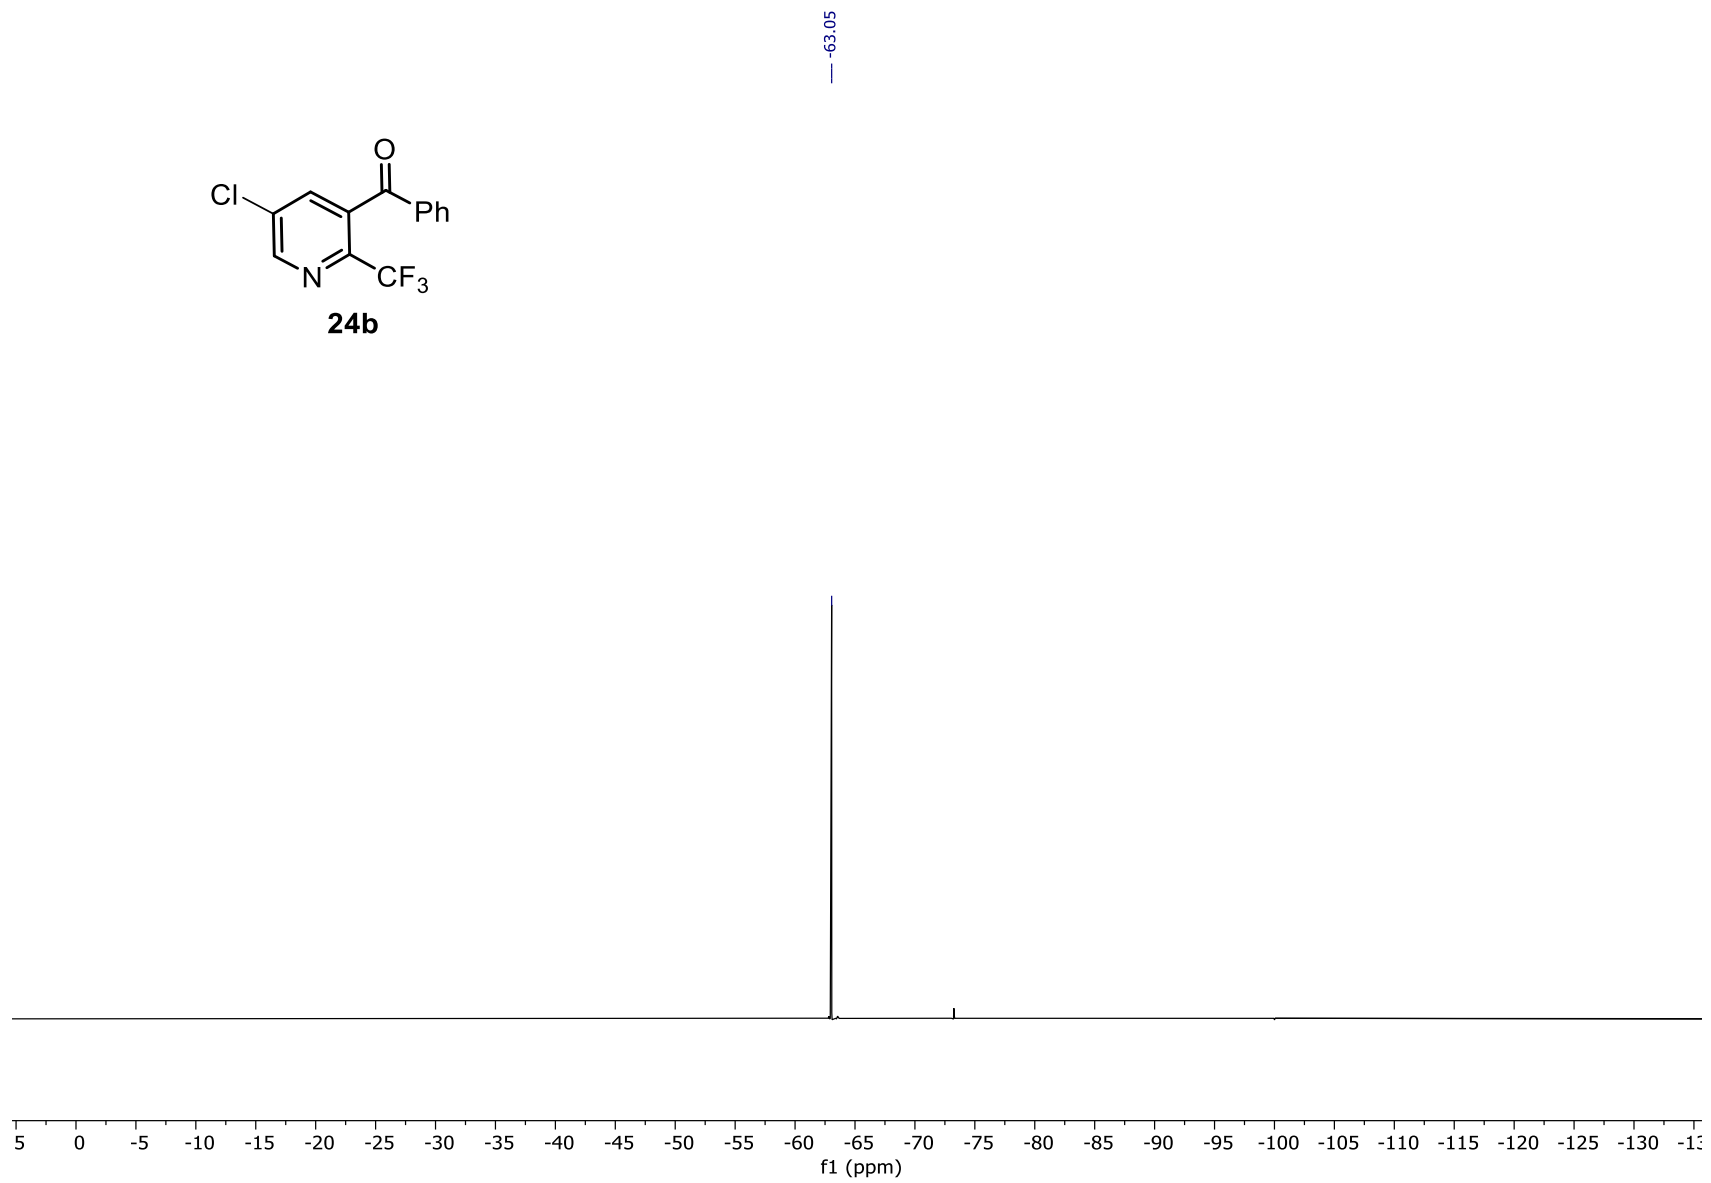

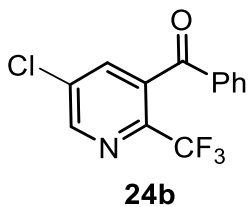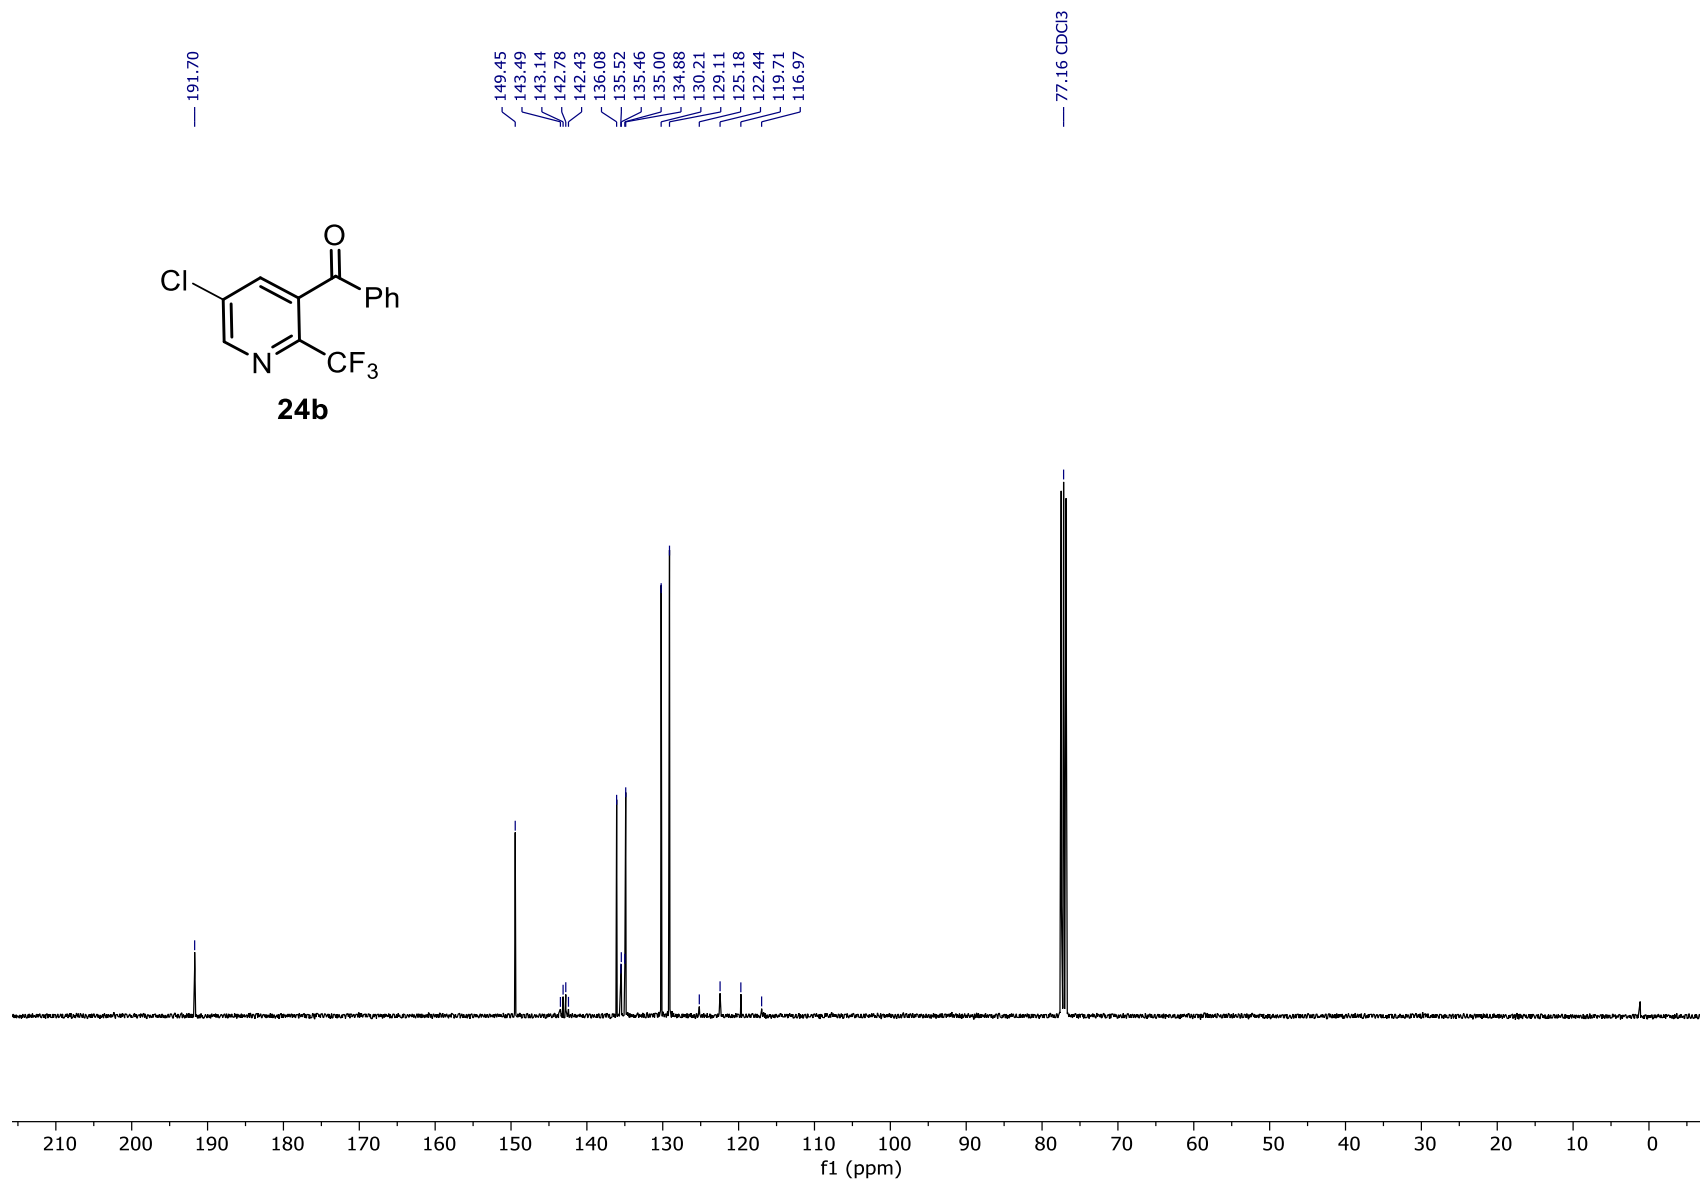

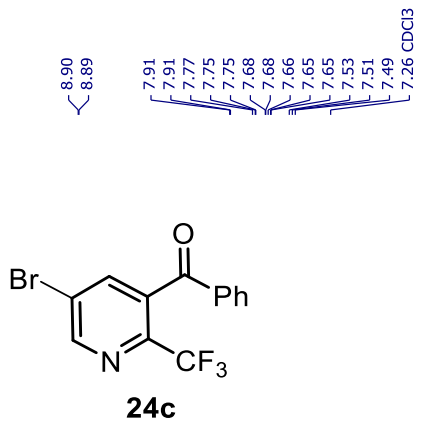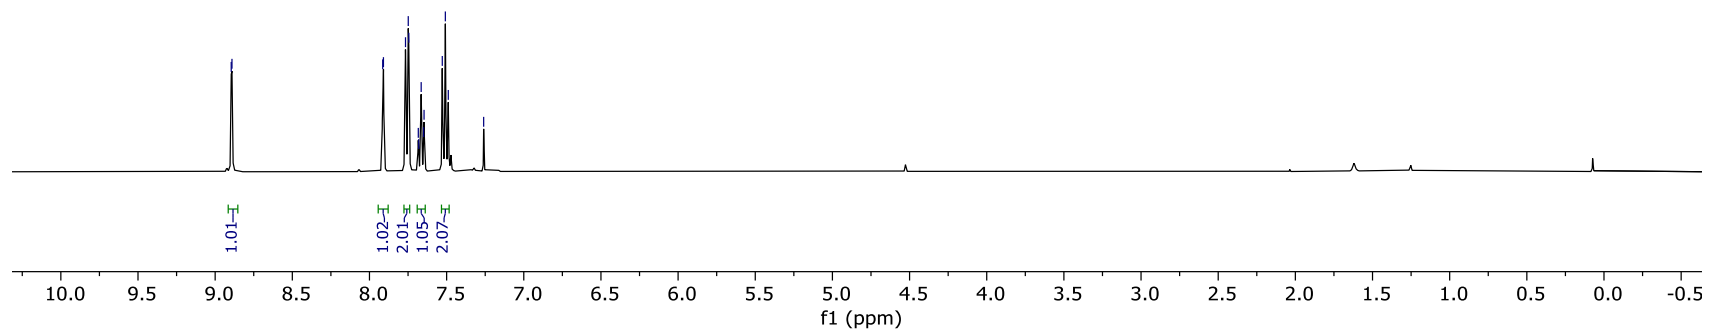

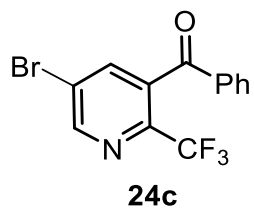

— 63.18

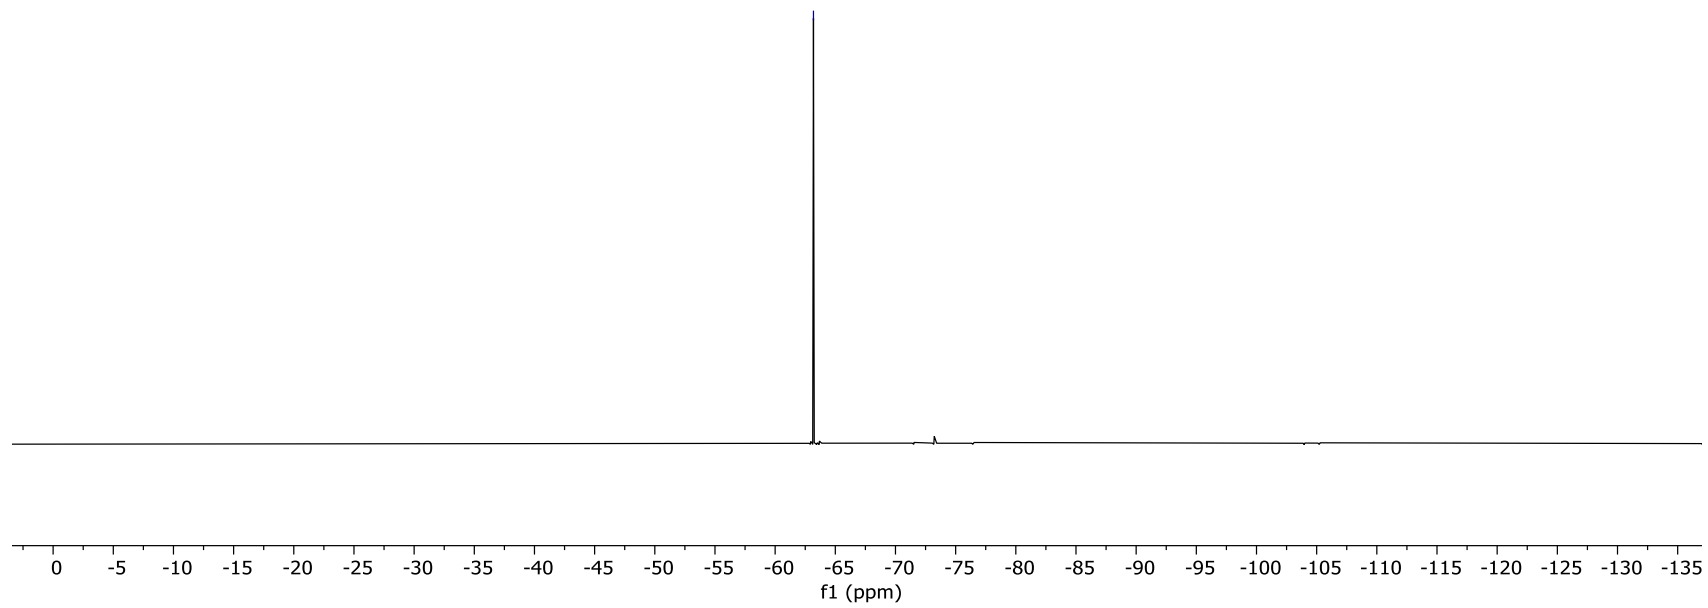

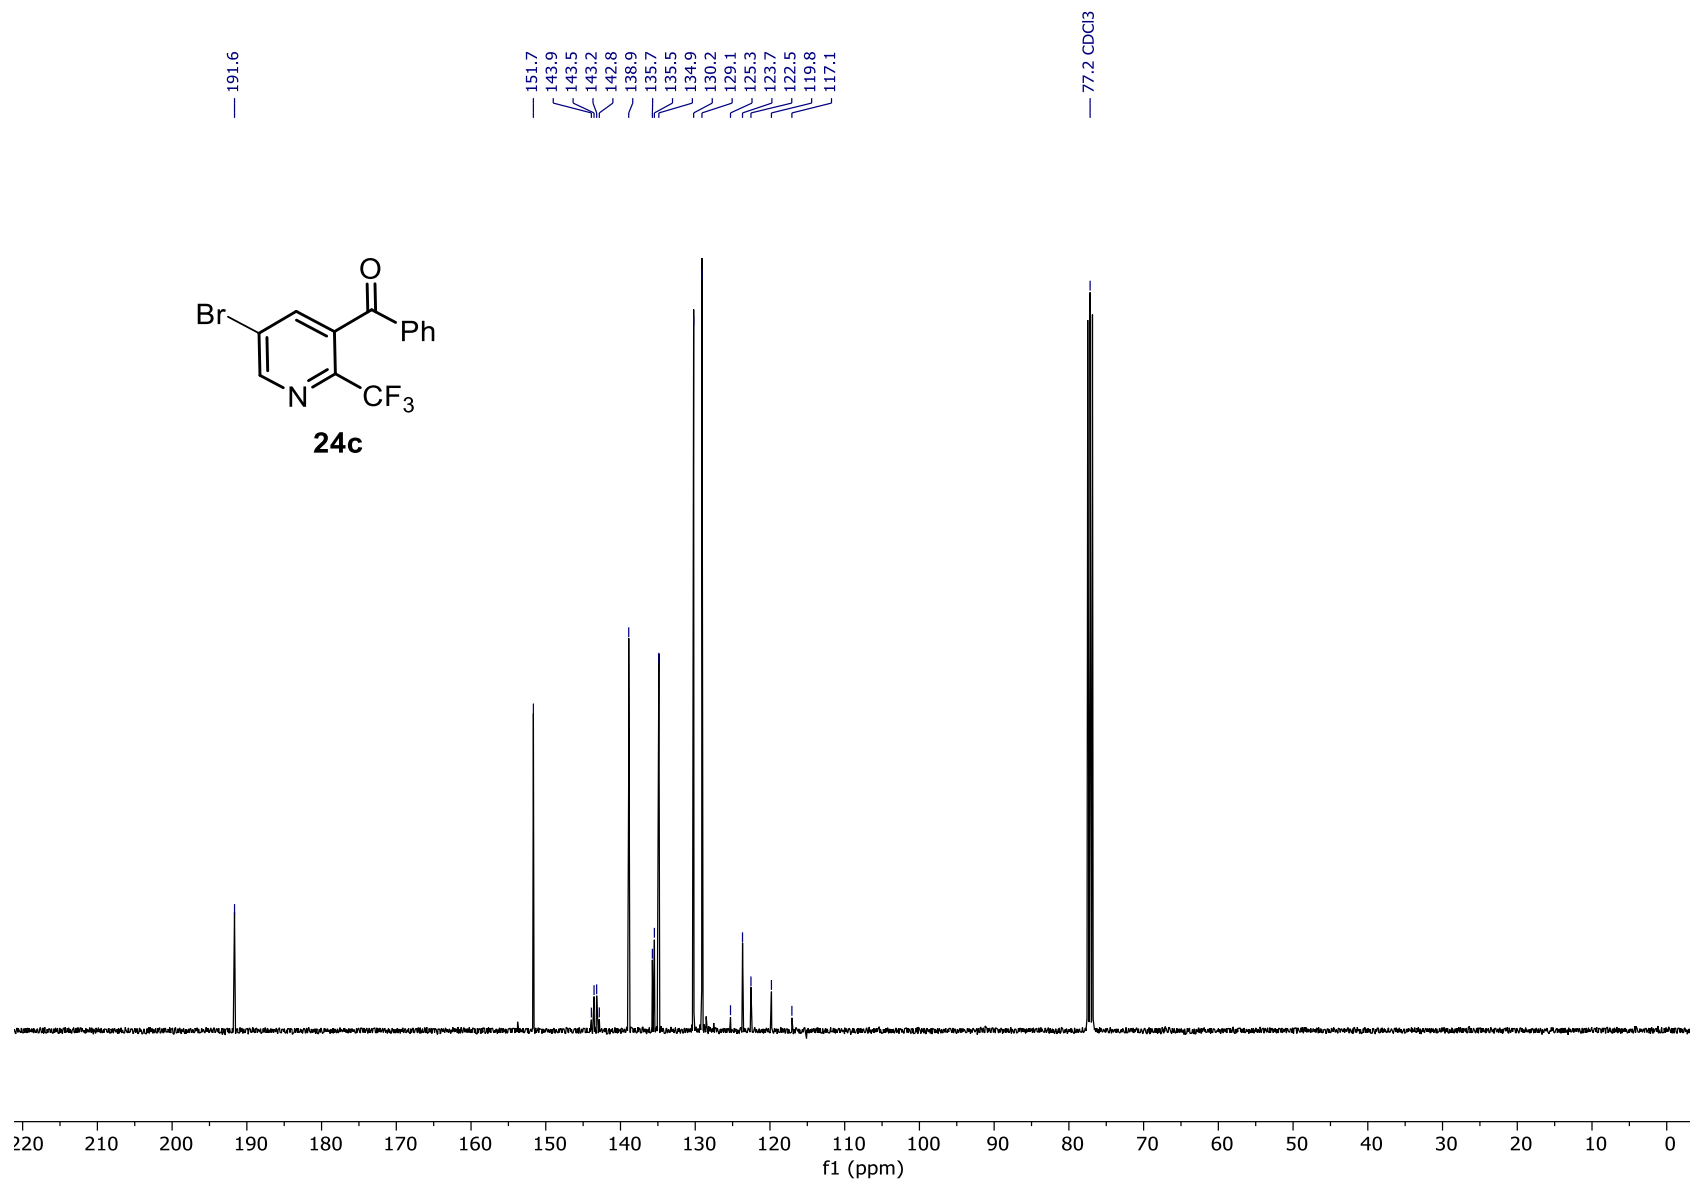

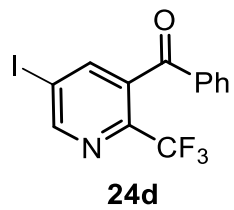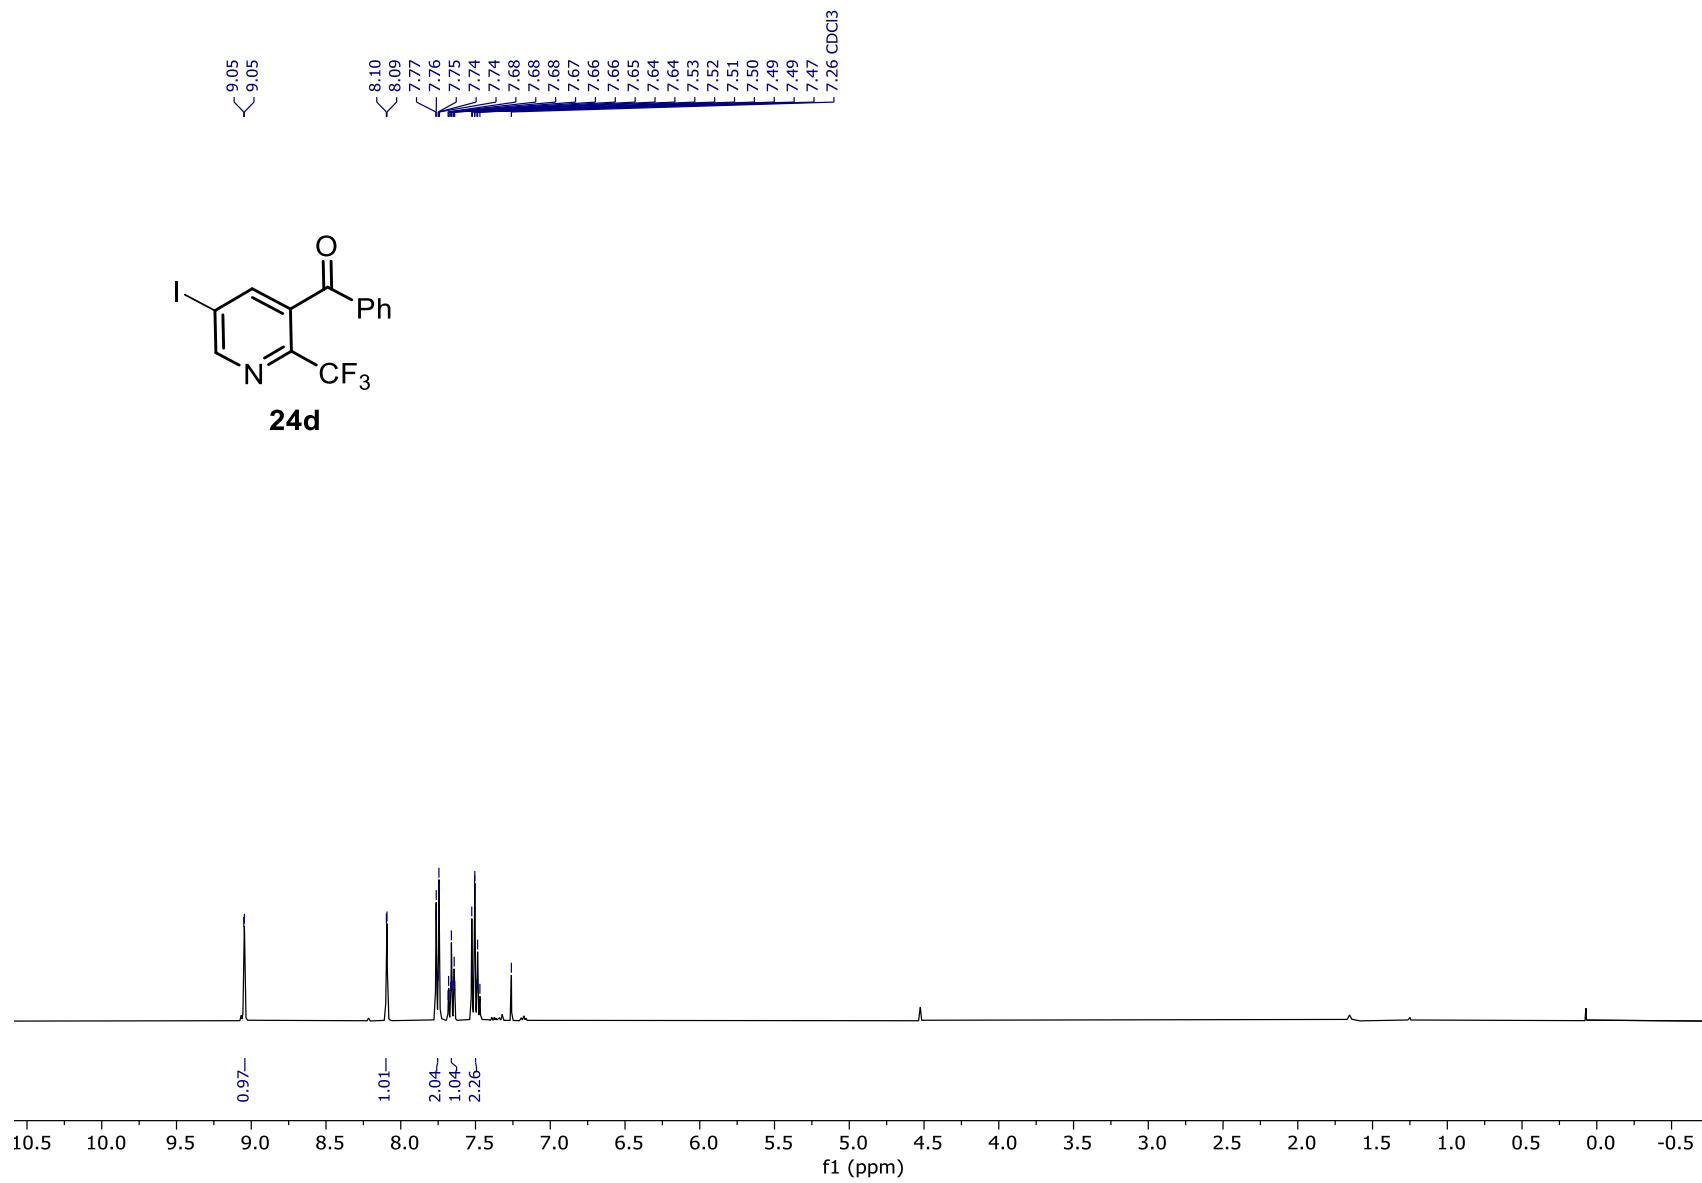

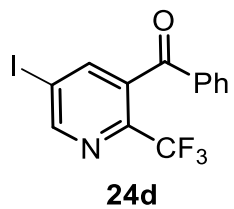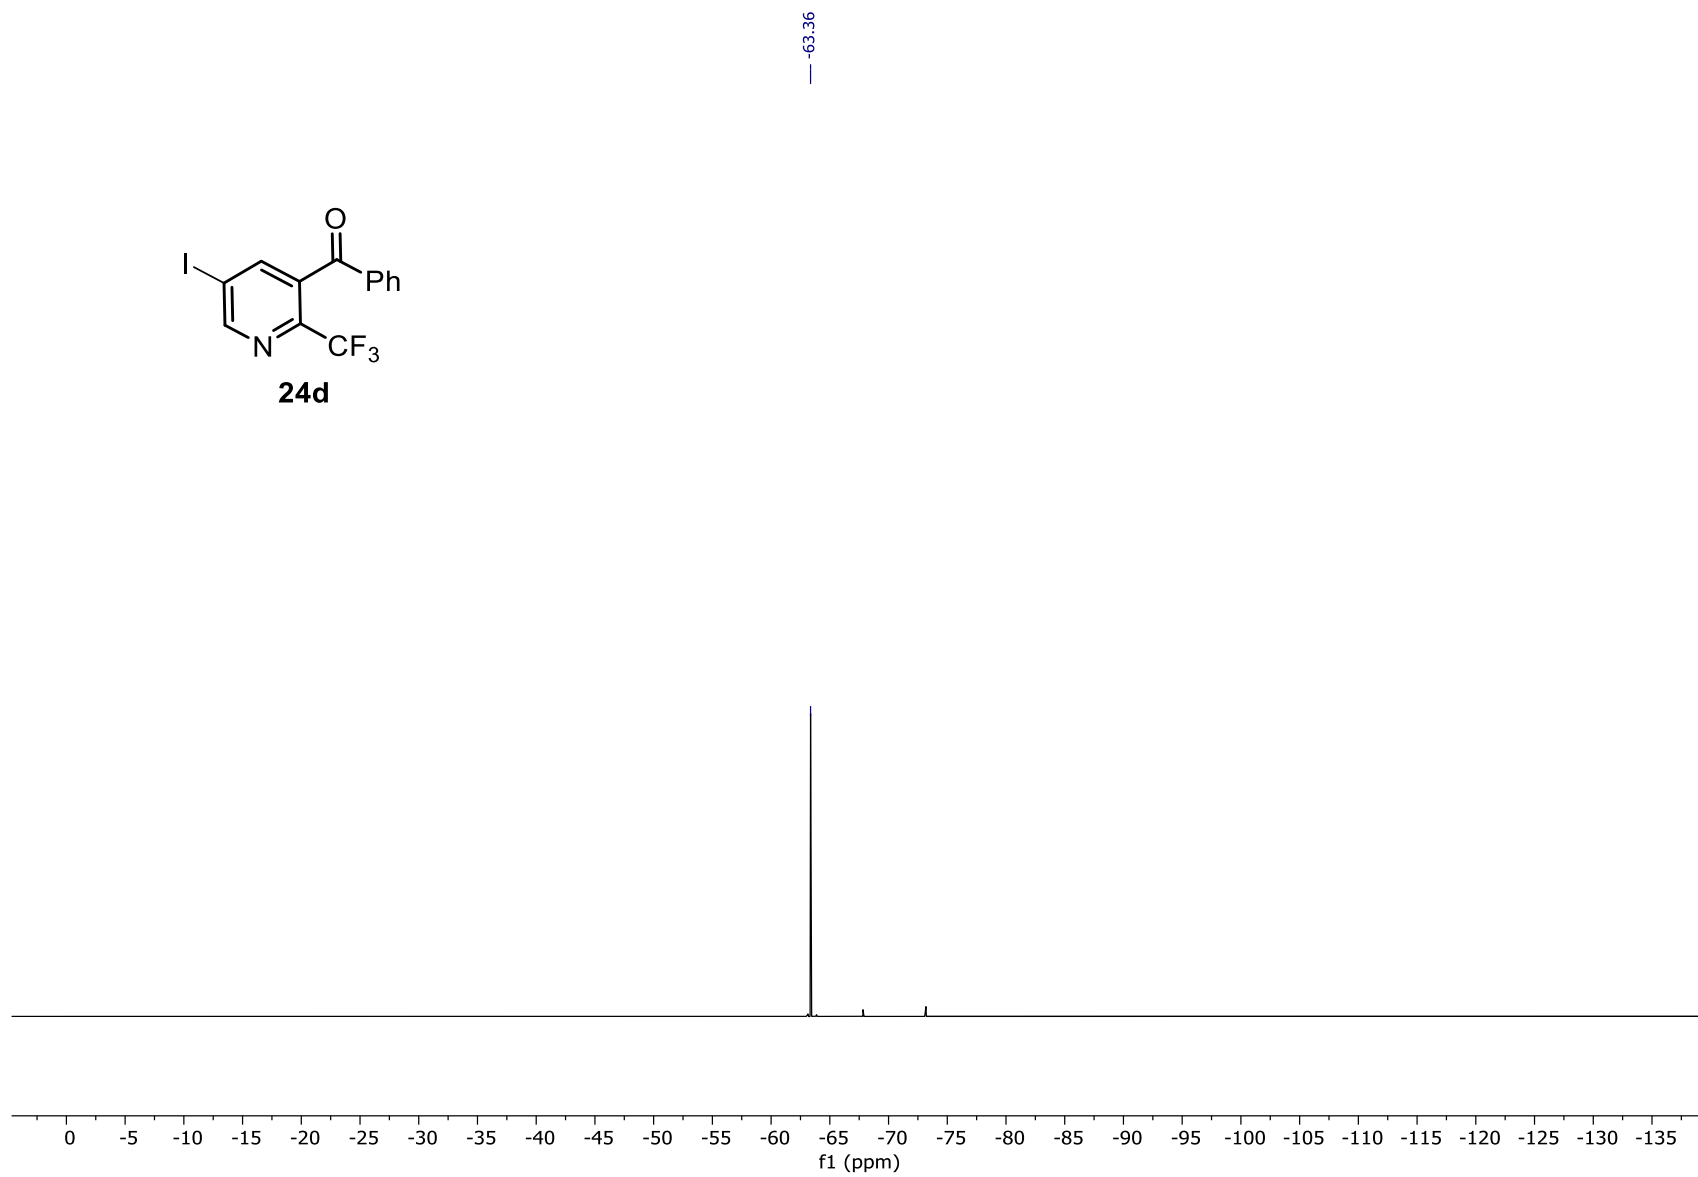

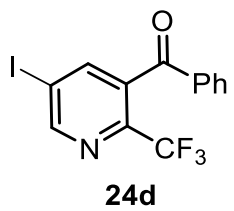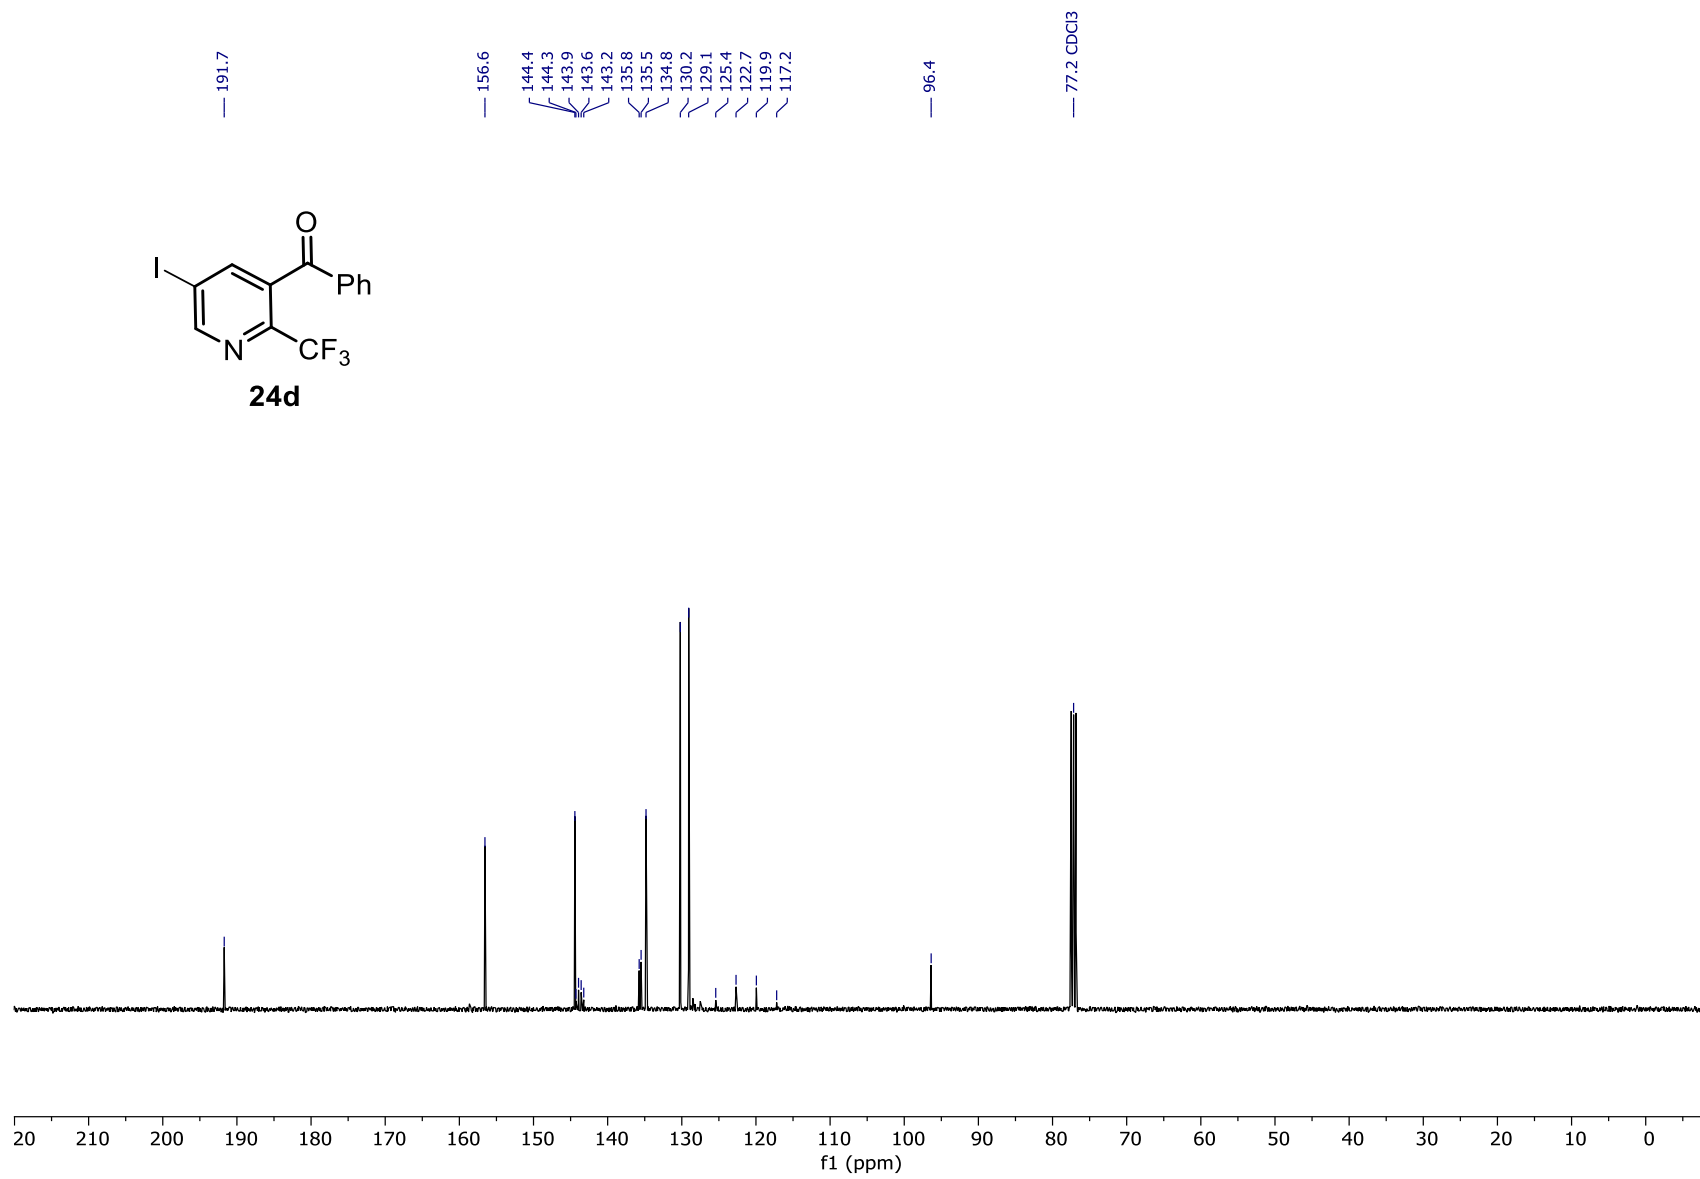

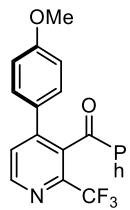

25a

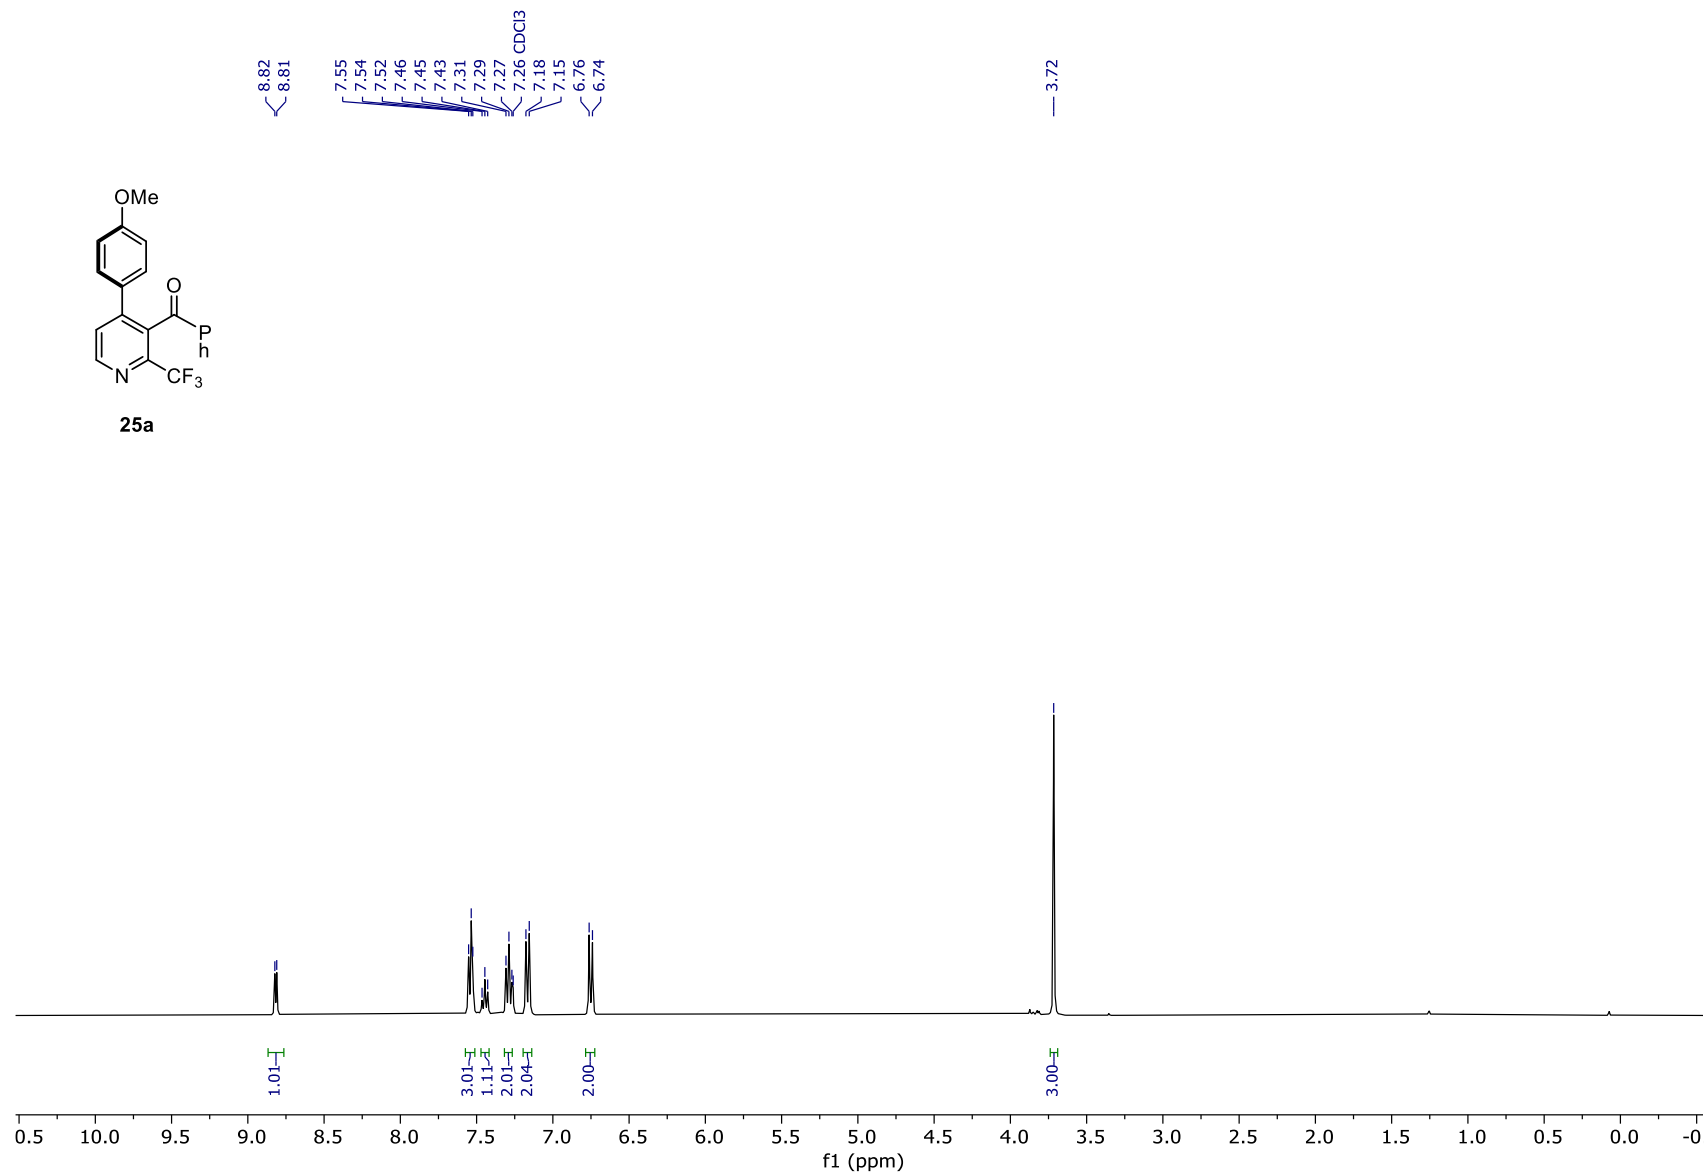

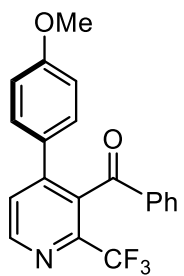

25a

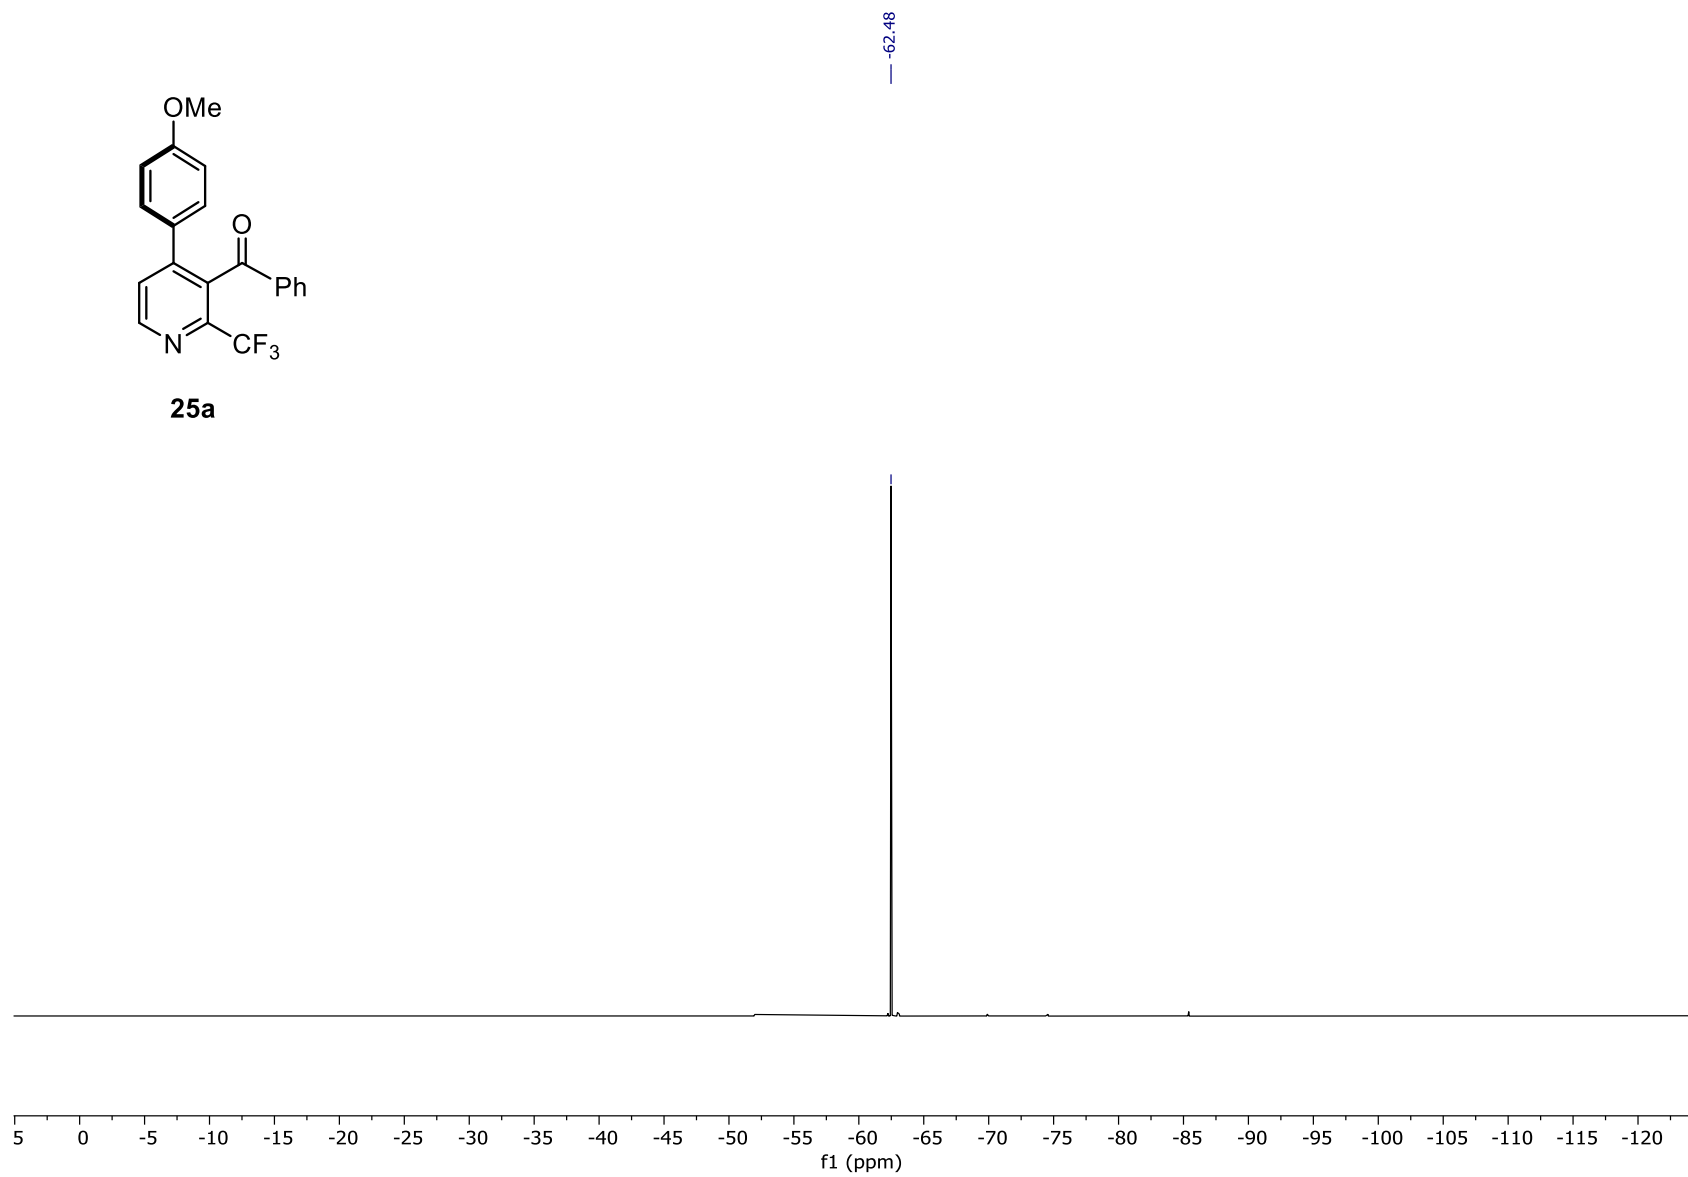

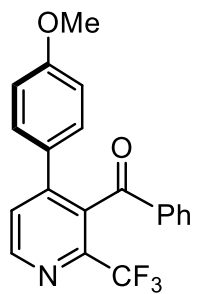

25a

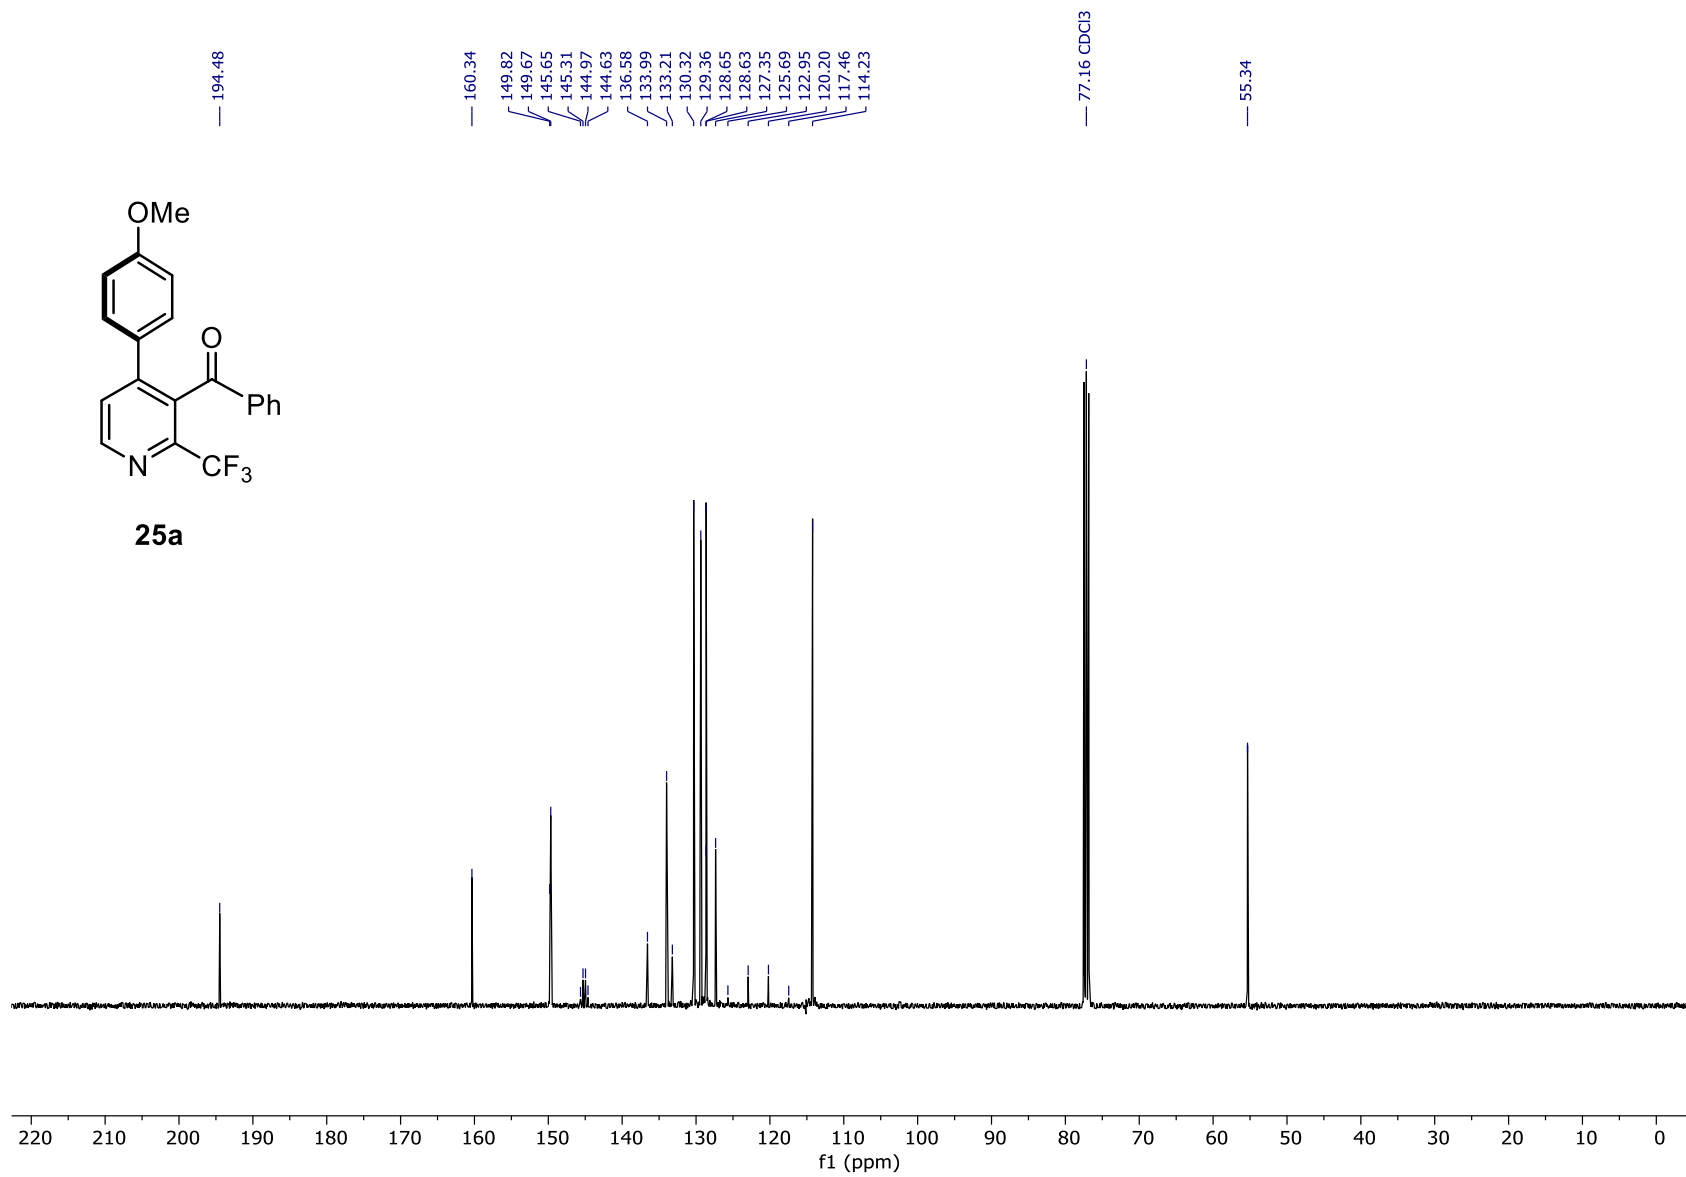

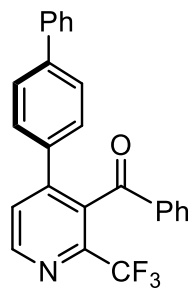

25b

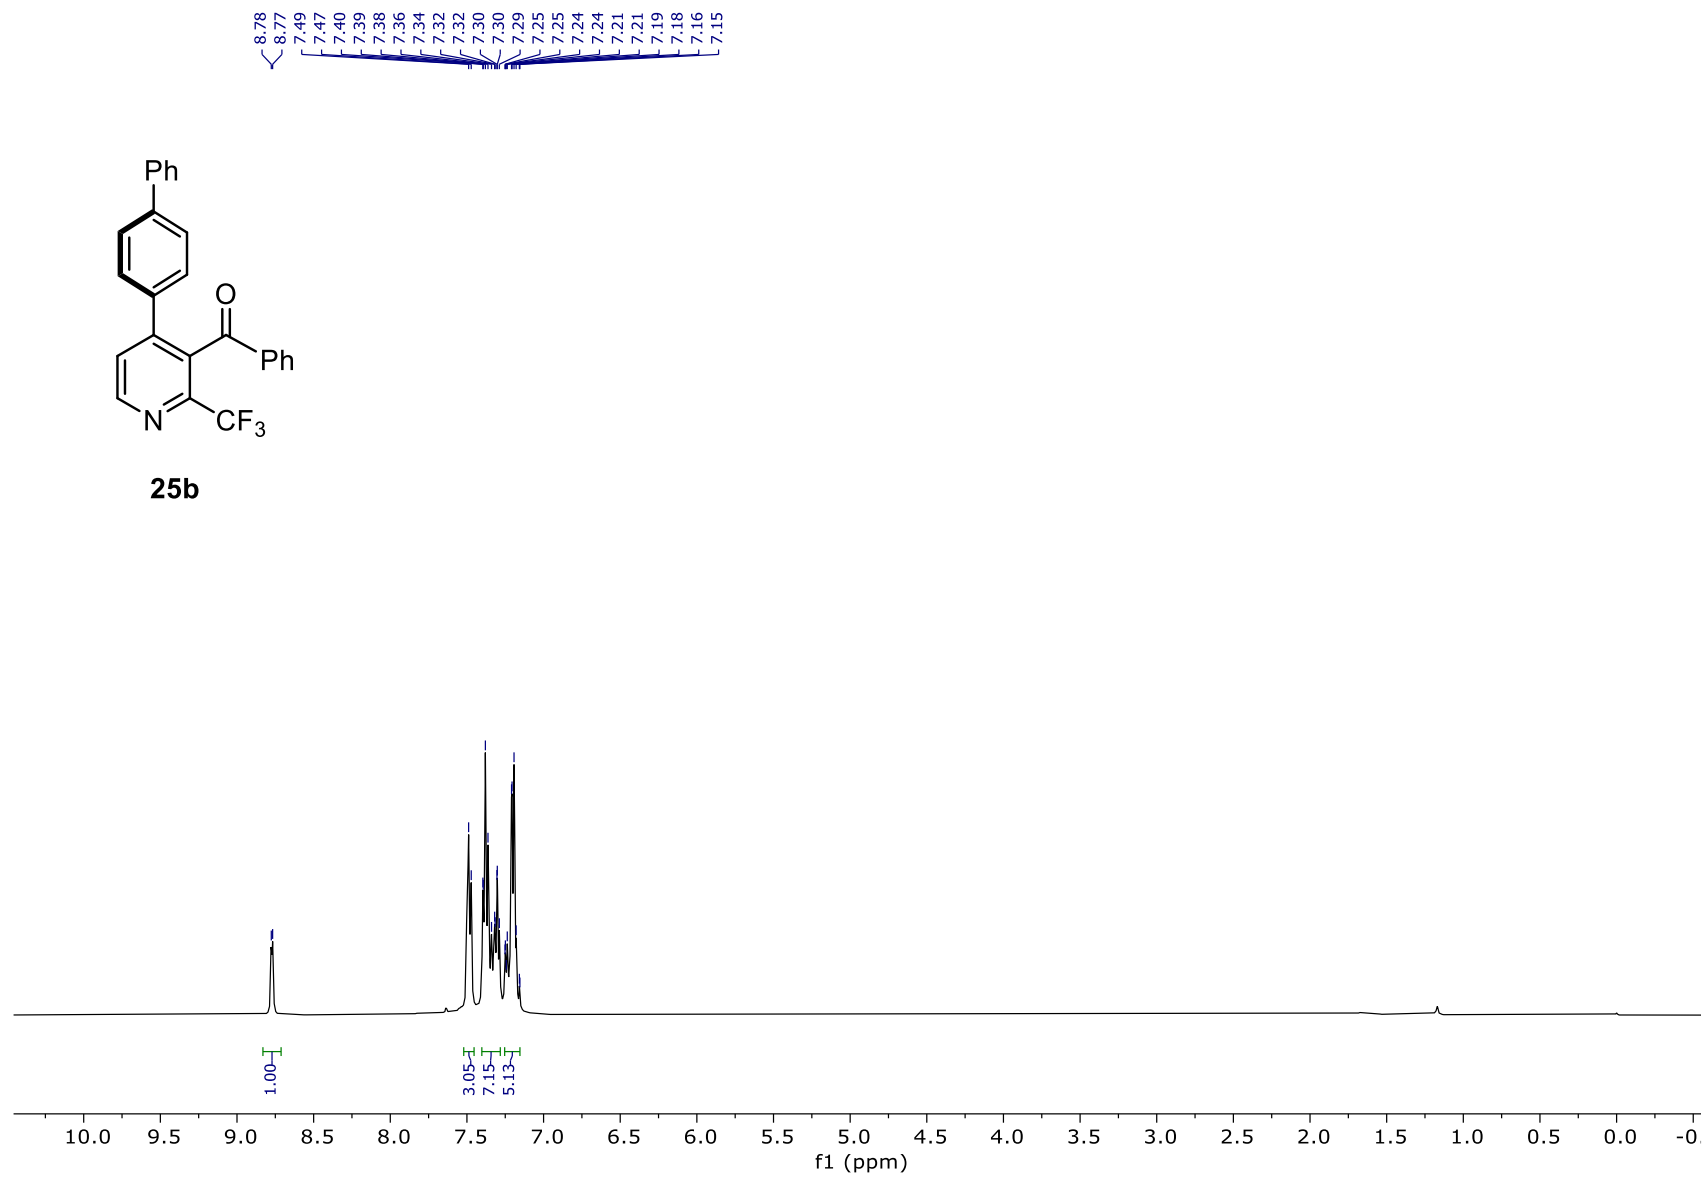

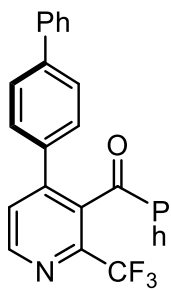

25b

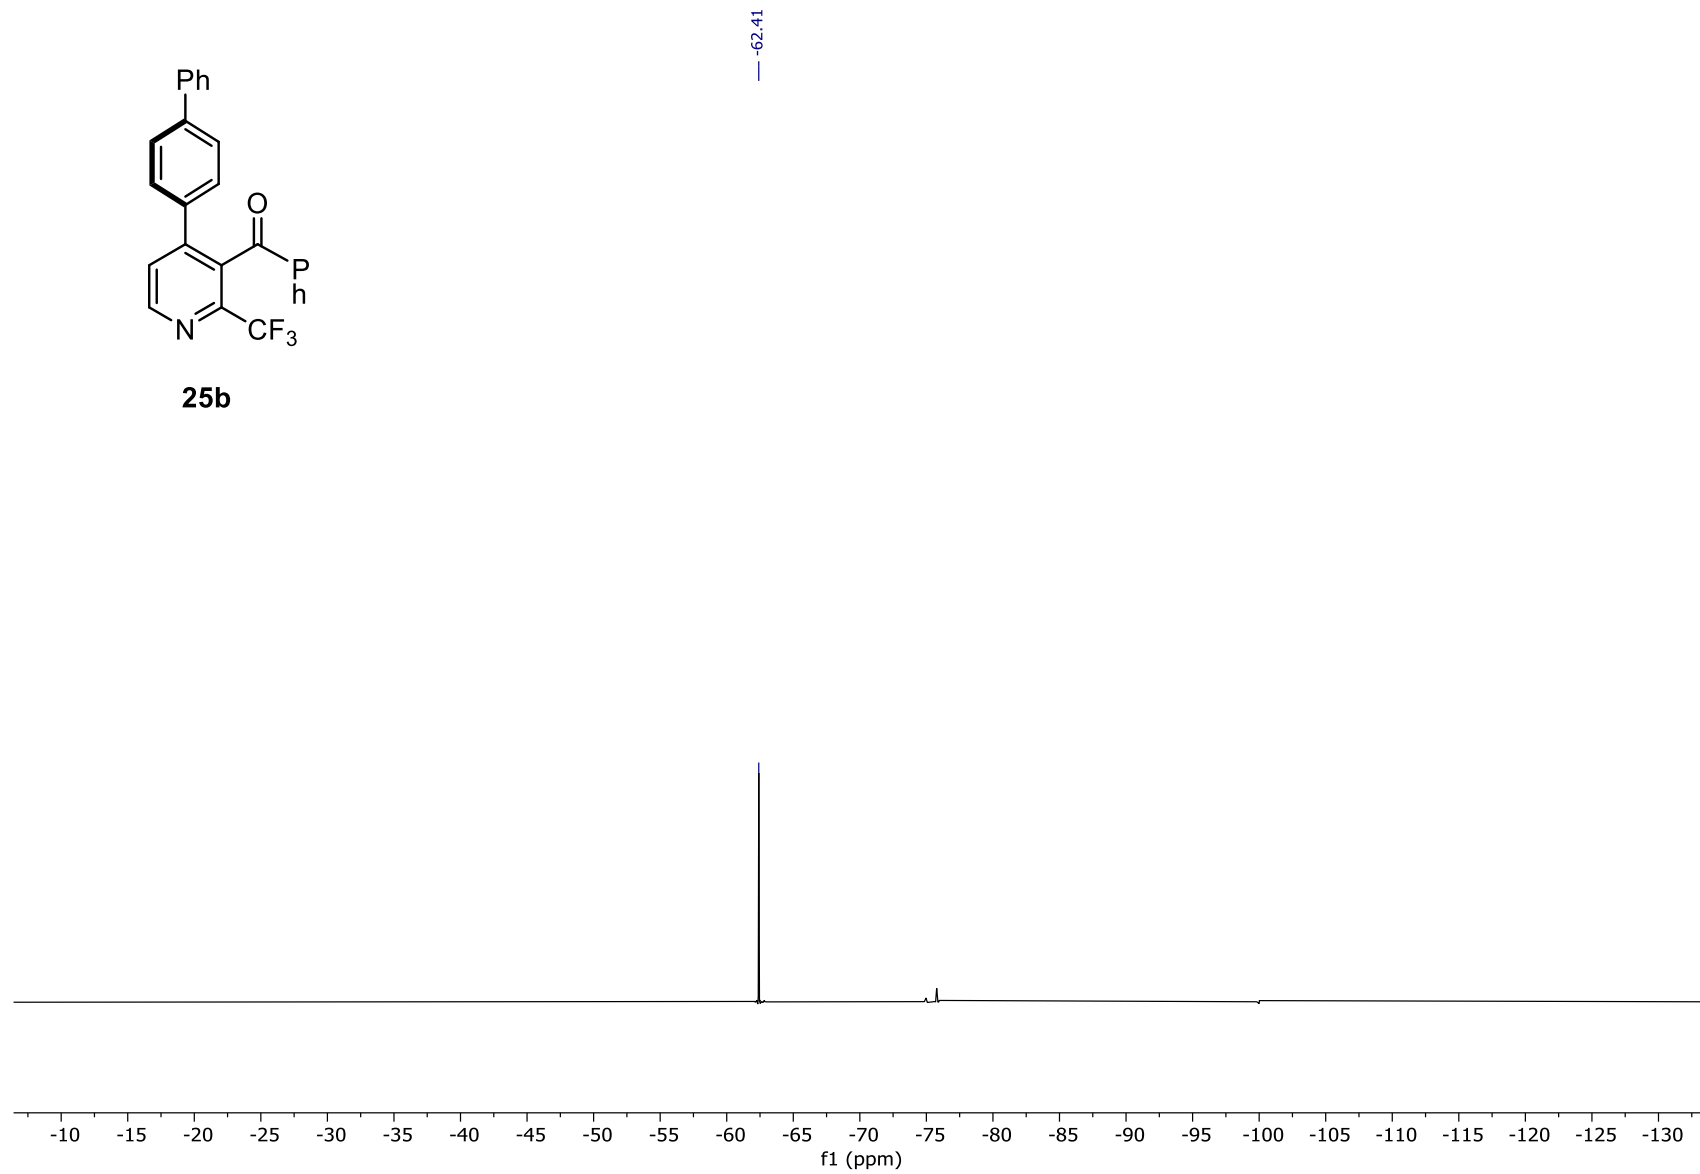

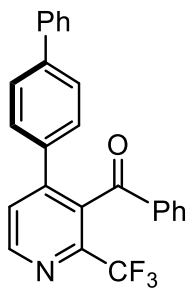

25b

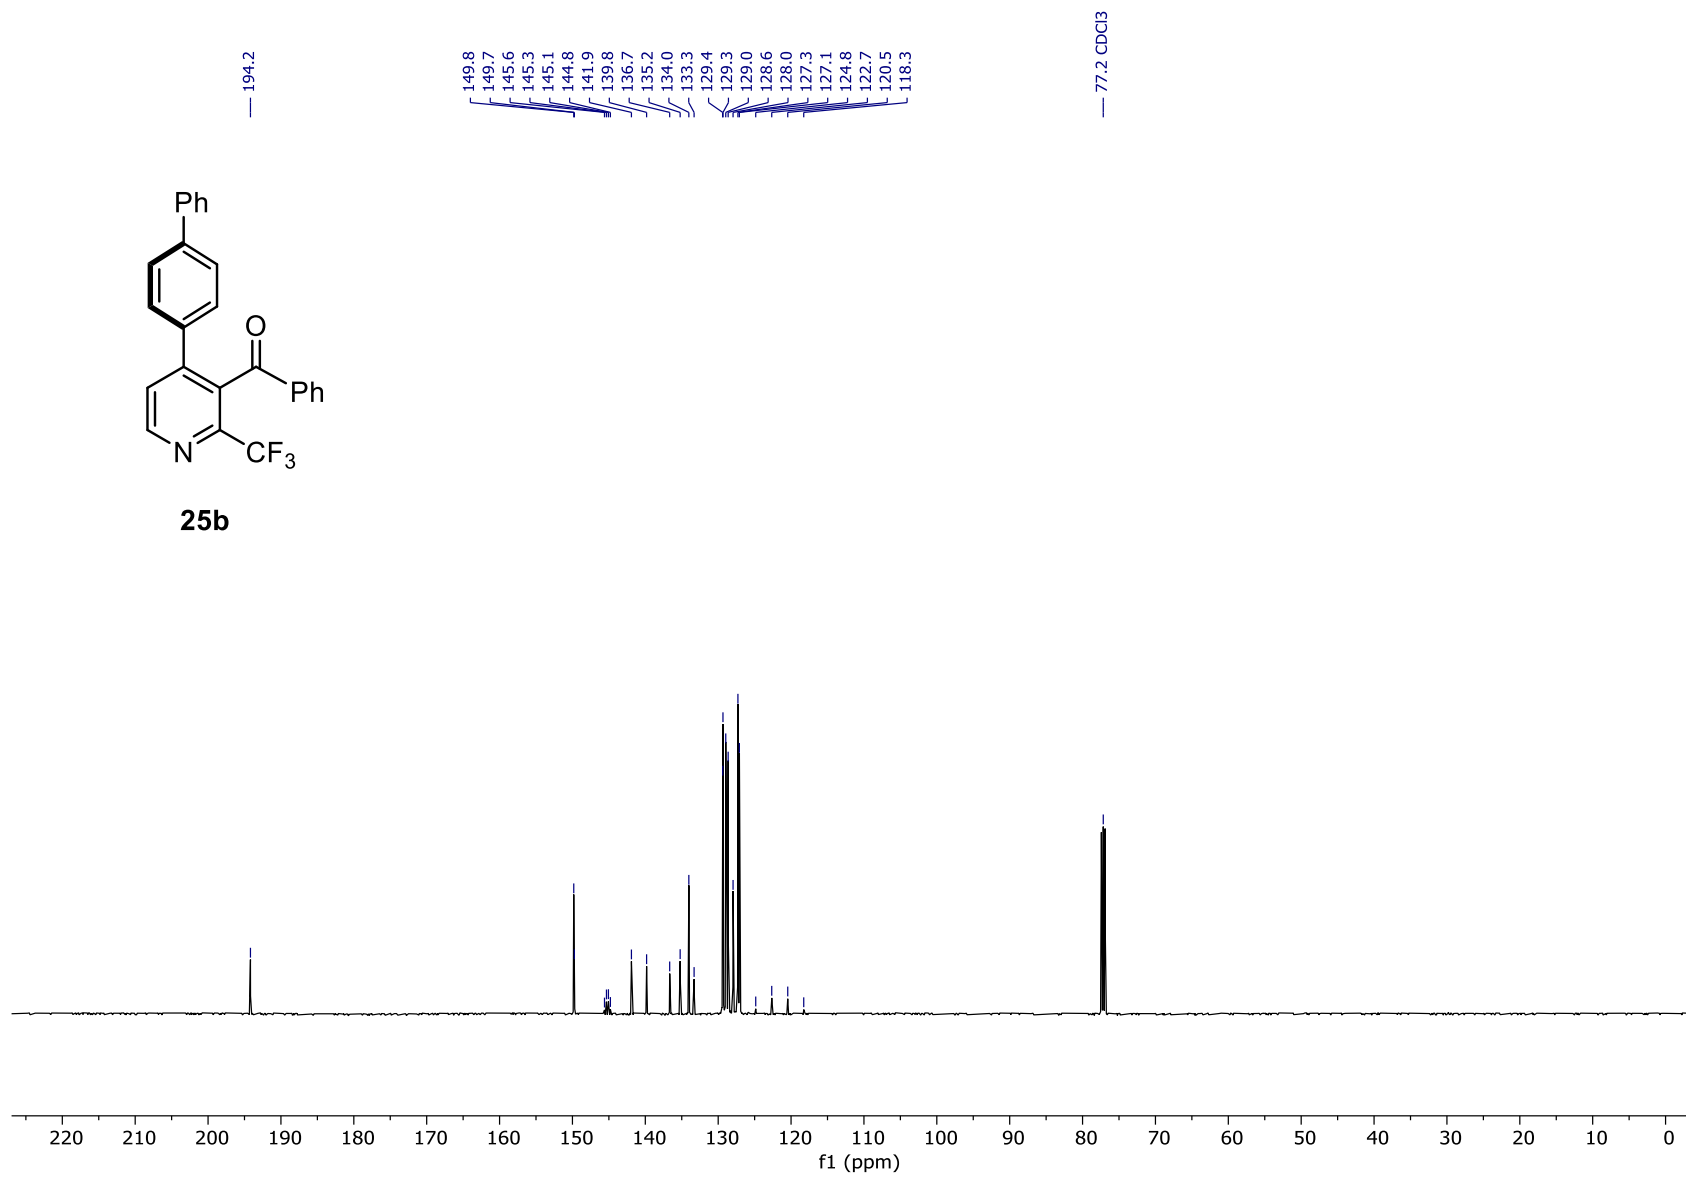

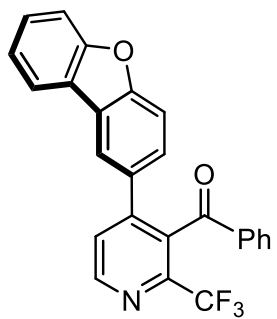

25c

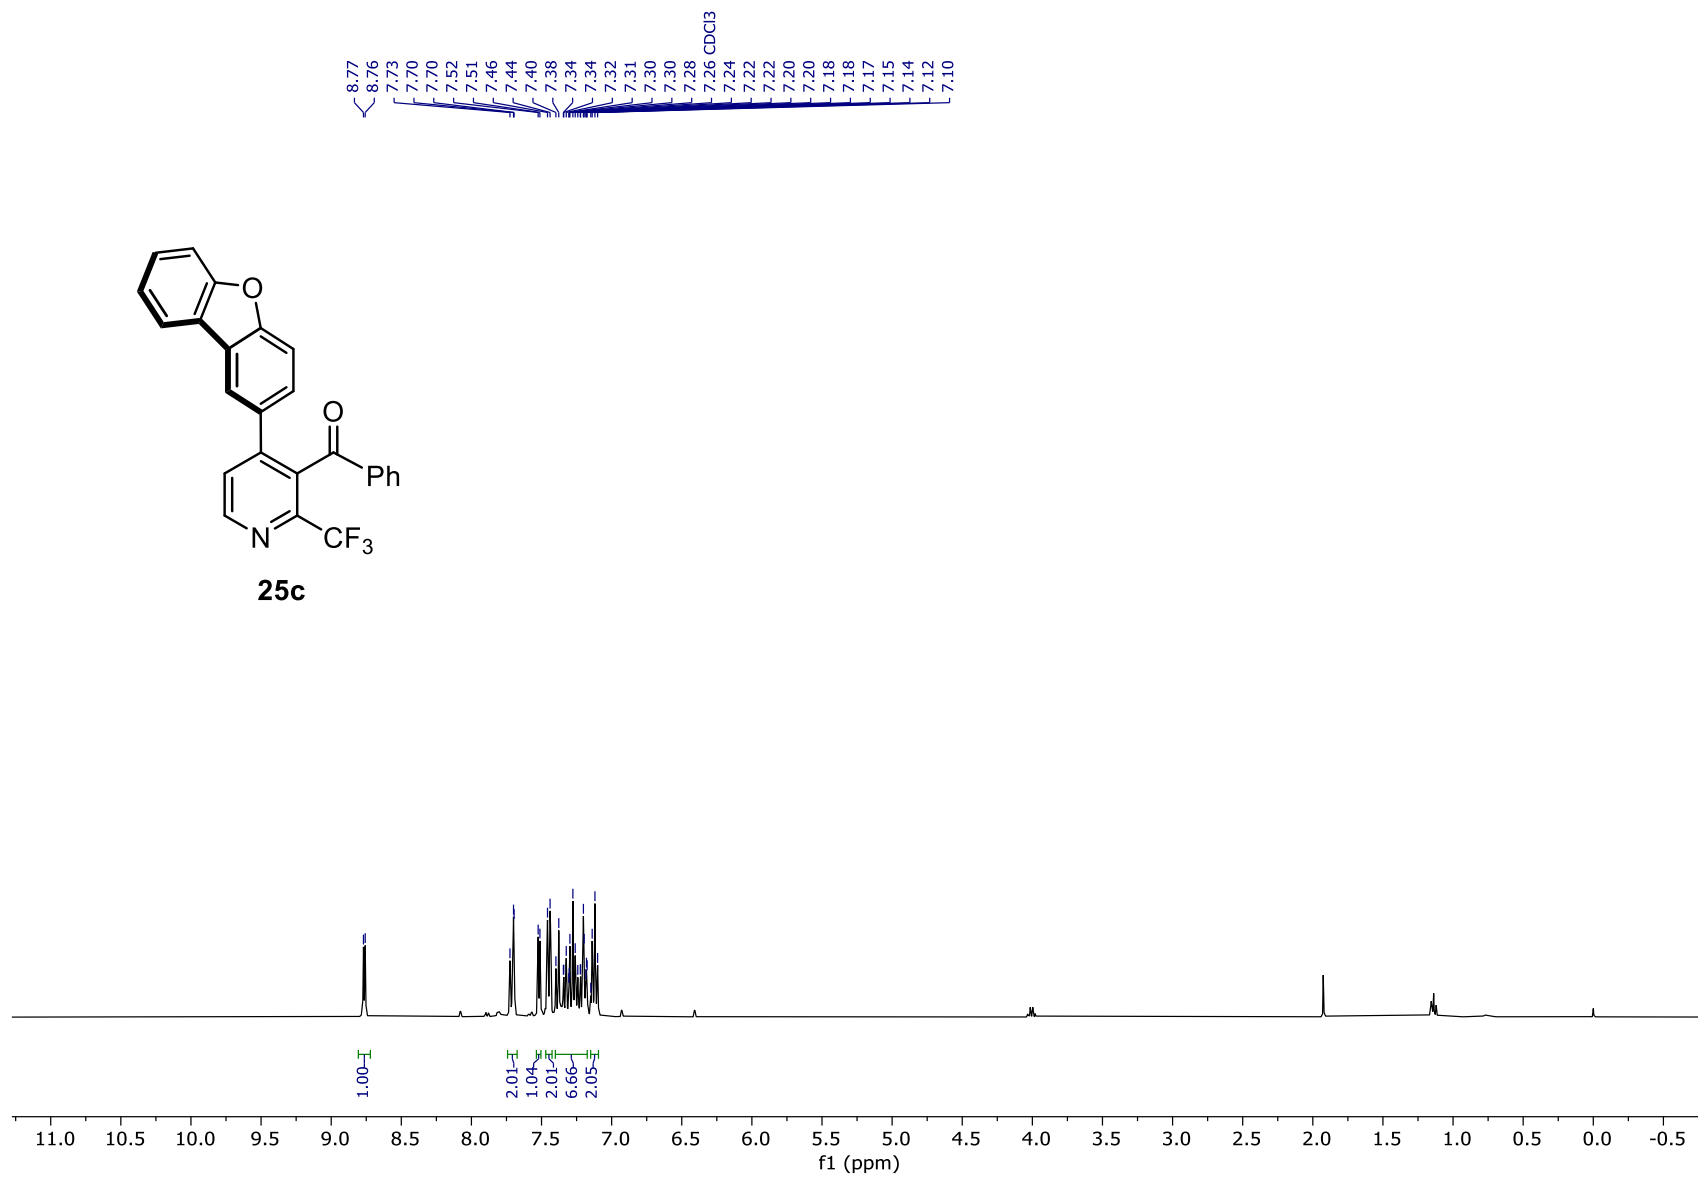

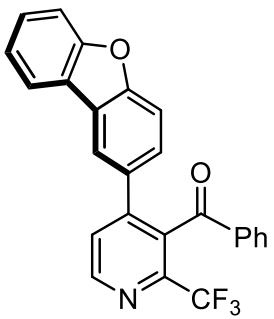

**25c**

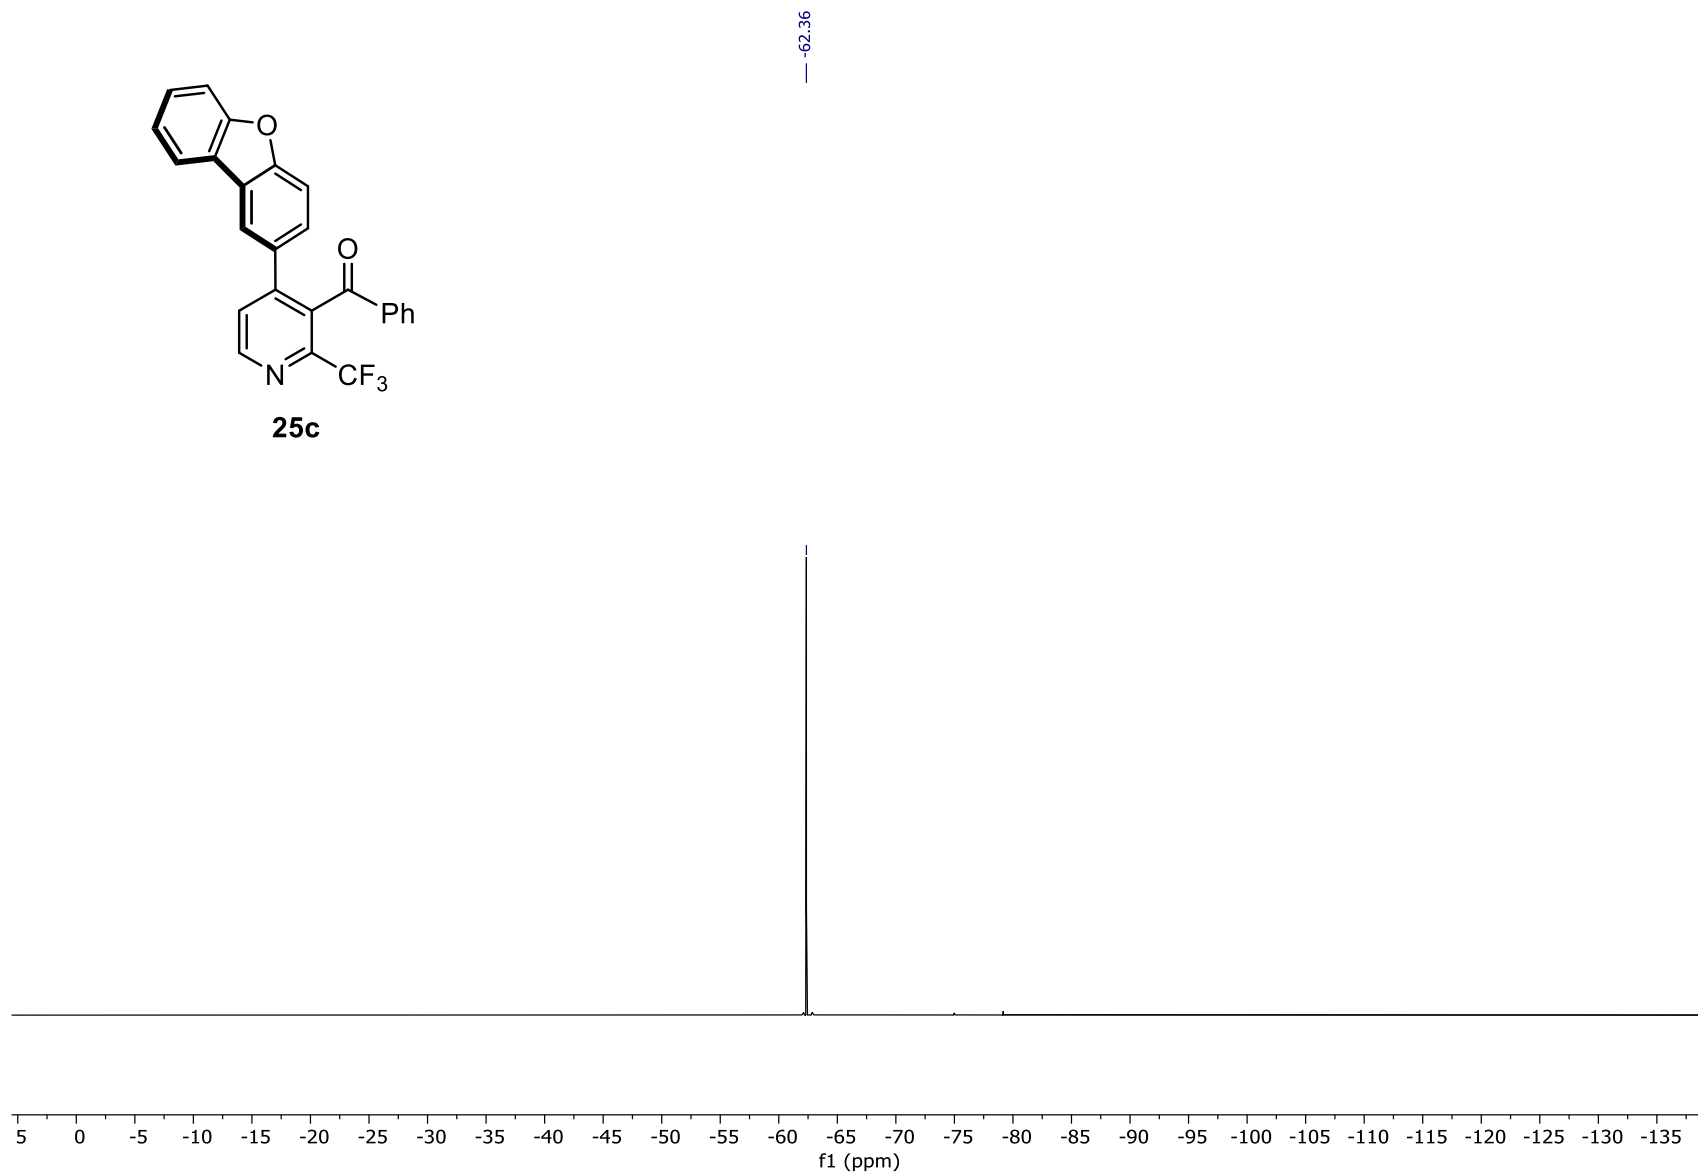

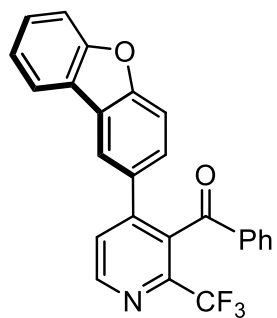

**25c**

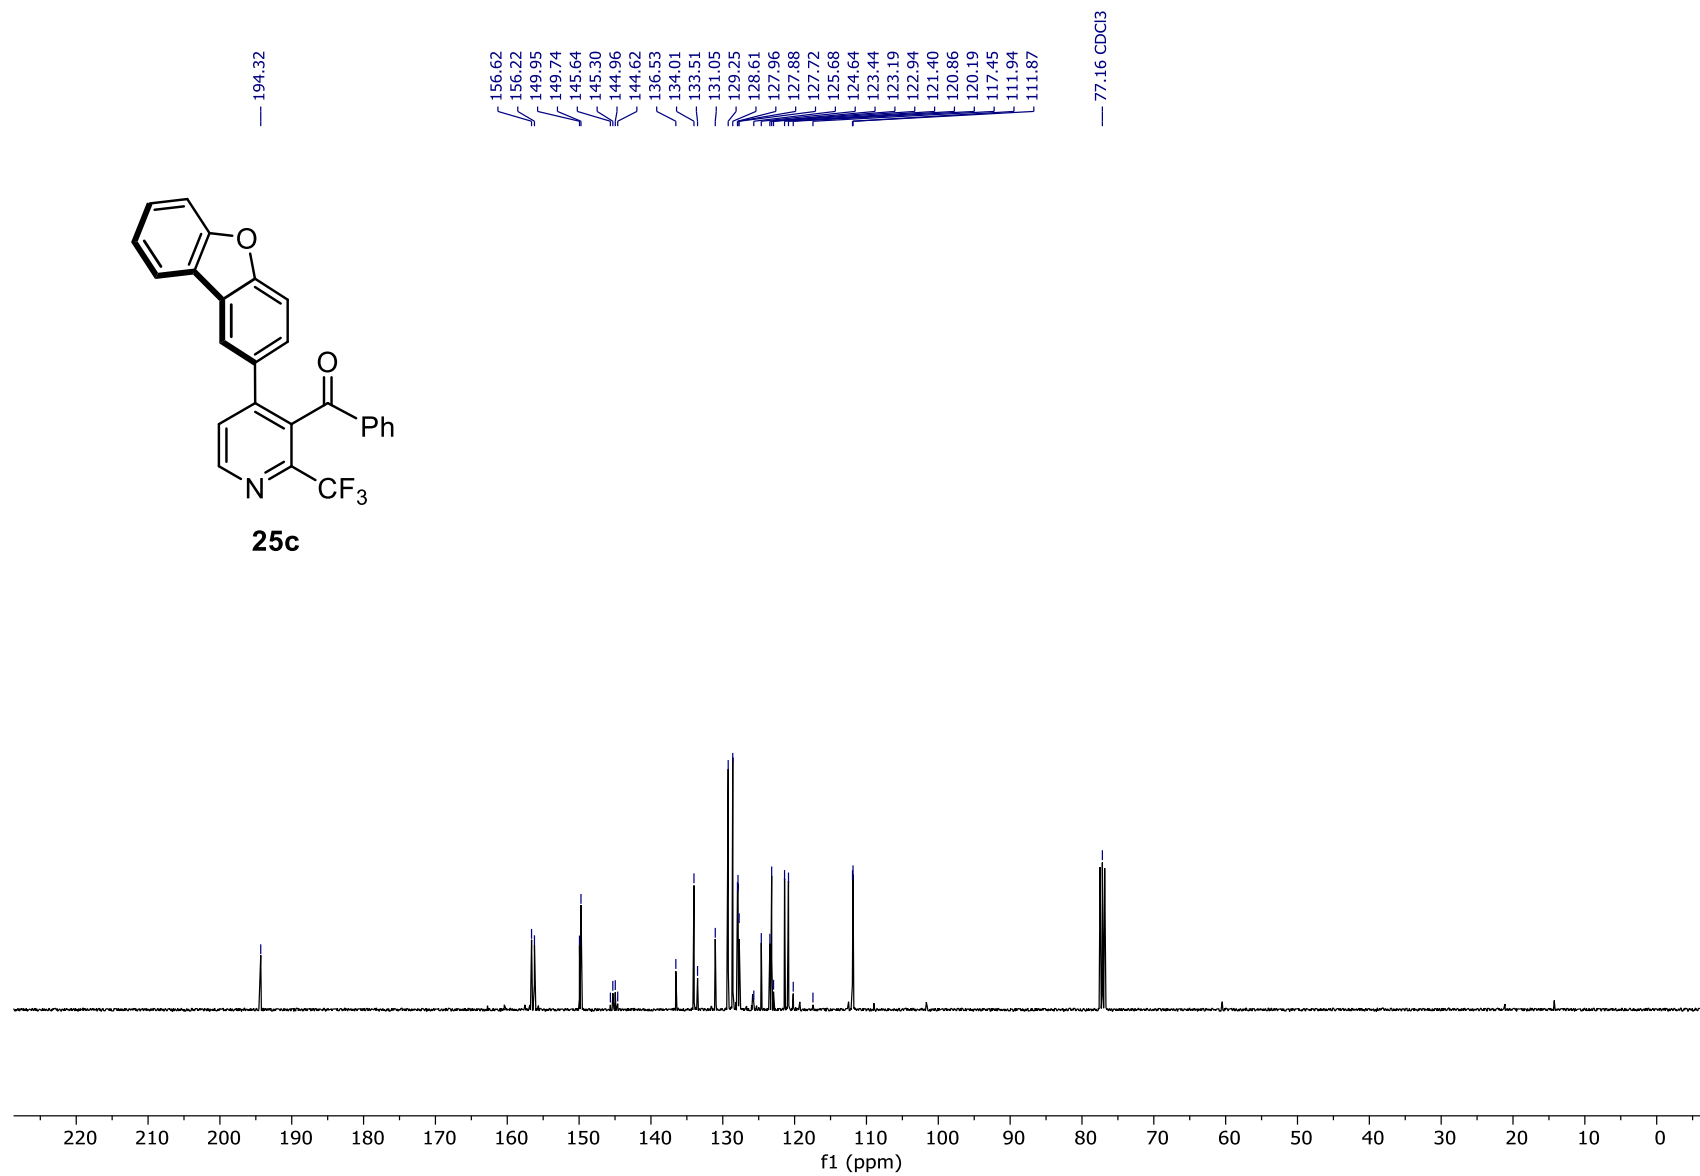

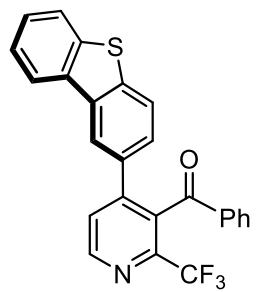

25d

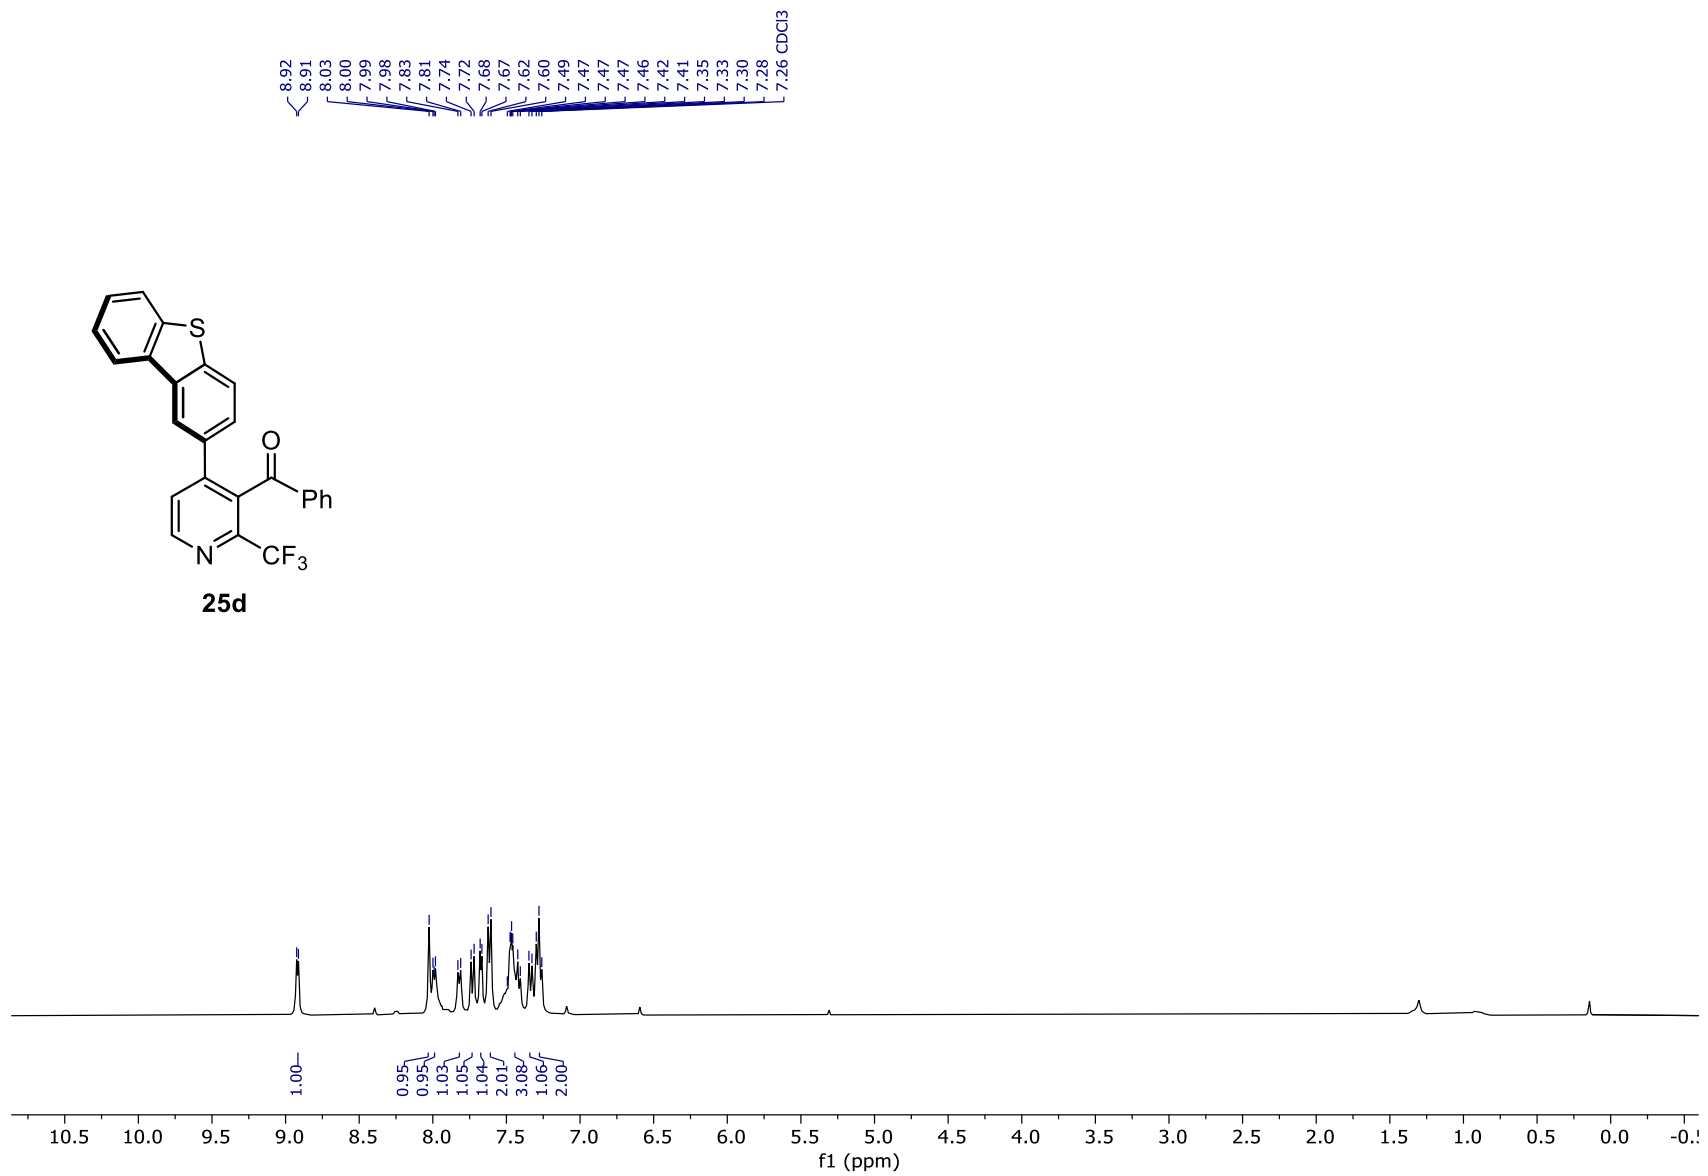

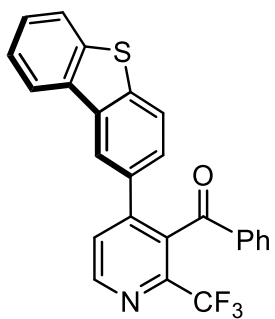

**25d**

-62.39

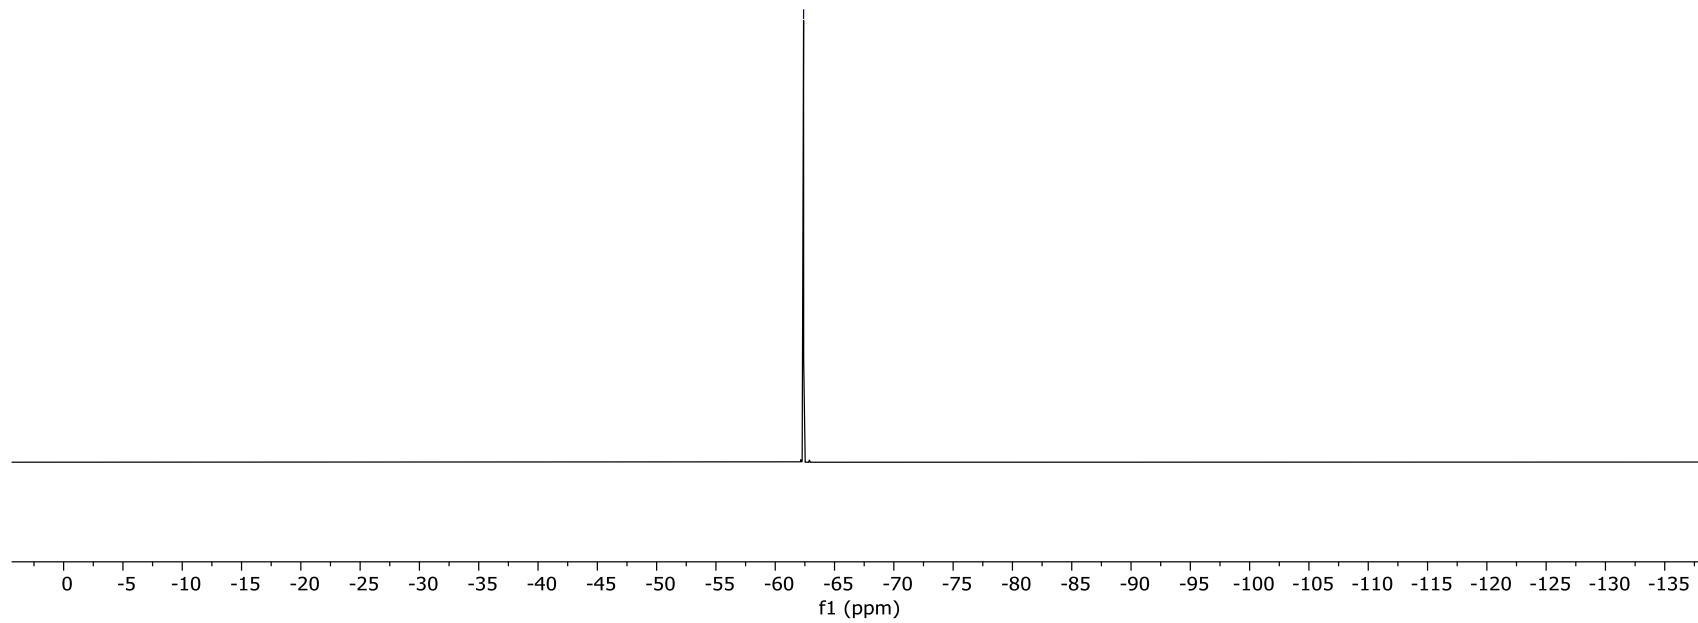

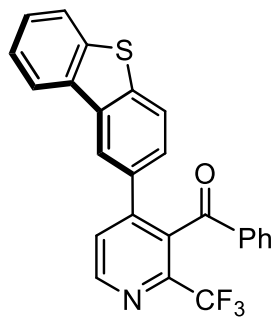

25d

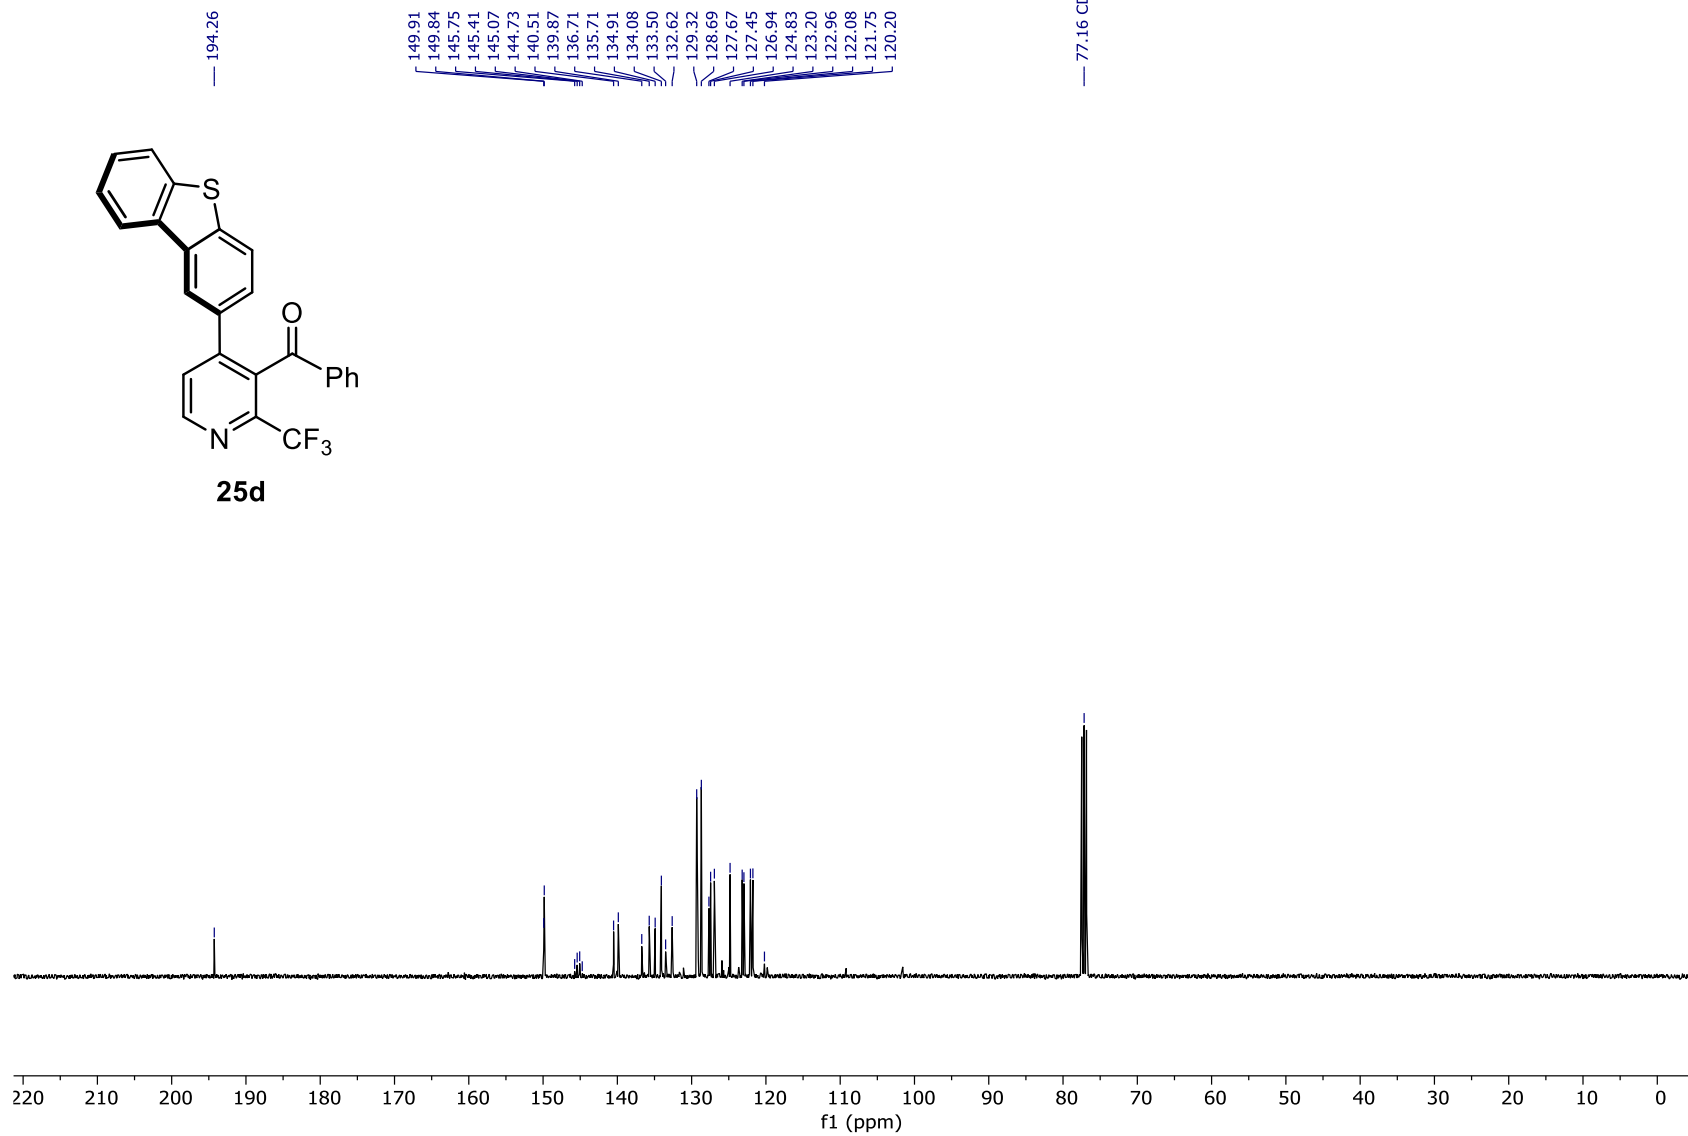

Supplement: d6sc04438g1.pdf [file d6sc04438g1.pdf]
